# Supplementary material for: Sesquiterpenes from the Fungus Antrodiella albocinnamomea with Cytotoxicity and Antibacterial Activity
Source: MDPI journal article supplement (doi:10.3390/jof9050521), 2023-04-28
Supplement: s1 [file s1]

## Supporting Information for

# Sesquiterpenes from the Fungus *Antrodiella albocinnamomea* with Cytotoxicity and Antibacterial Activity

Jin-Lei Ning <sup>†</sup>, Feng Wu <sup>†</sup>, Ji-Kai Liu, Juan He <sup>\*</sup> and Tao Feng <sup>\*</sup>

School of Pharmaceutical Sciences, South-Central Minzu University, Wuhan 430074, China;  
jlning026@163.com (J.-L.N.); wfeng828@163.com (F.W.); jkliu@mail.kib.ac.cn (J.-K.L.)

<sup>\*</sup> Correspondence: 2015048@mail.scuec.edu.cn (J.H.); tfeng@mail.scuec.edu.cn (T.F.)

<sup>†</sup> These authors contributed equally to this work.

## Content

### Sections S1. Computational details

S1.1 Computational details for albocinnamin A (1a/1b) (ECD)

S1.2 Computational details for albocinnamin B (2) (ECD)

S1.3 Computational details for albocinnamin C (3) (ECD)

S1.4 Computational details for albocinnamin F (6) (ECD)

S1.5 Computational details for albocinnamin G (7) (ECD)

### Sections S2. X-Ray details

S2.1 X-Ray details for albocinnamin A (1a/1b)

S2.1 X-Ray details for albocinnamin E (5)

### Sections S3. Supplementary of NMR and HRESIMS

S3.1 NMR and HRESIMS spectra of albocinnamin A (1a/1b)

S3.2 NMR and HRESIMS spectra of albocinnamin B (2)

S3.3 NMR and HRESIMS spectra of albocinnamin C (3)

S3.4 NMR and HRESIMS spectra of albocinnamin D (4)

S3.5 NMR and HRESIMS spectra of albocinnamin E (5)

S3.6 NMR and HRESIMS spectra of albocinnamin F (6)

S3.7 NMR and HRESIMS spectra of albocinnamin G (7)

S3.8 NMR and HRESIMS spectra of albocinnamin H (8)

## Section S1. ECD calculations for 1–3, 6–7

### S1.1. Computational details for 1a/1b (ECD)

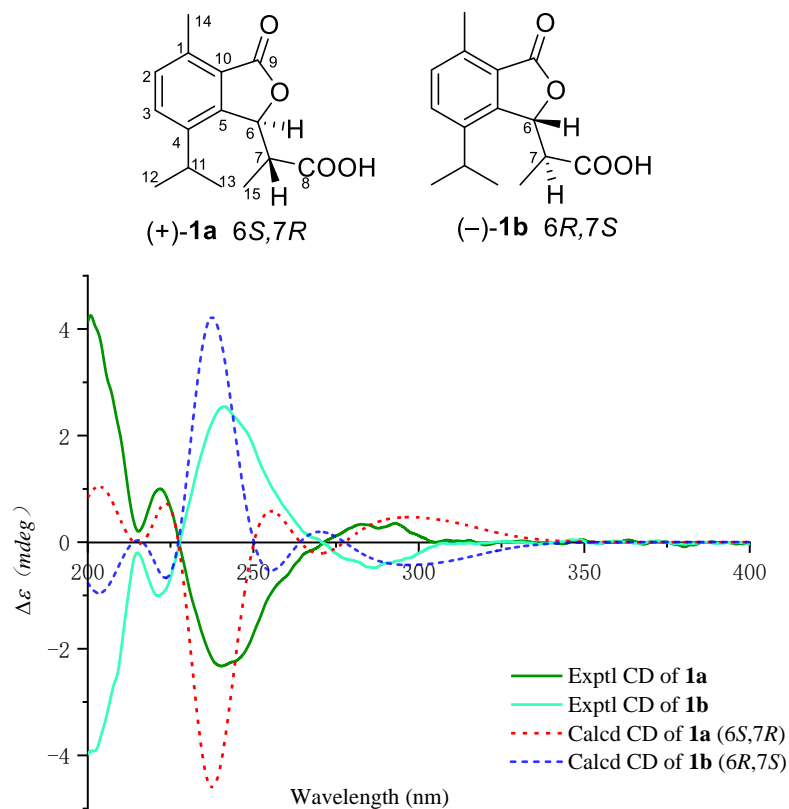

**Figure S1.** Comparison of the calculated ECD spectra for possible structure with the experimental spectrum of **1a/1b** in methanol with PCM model.

**Table S1.** Energy analysis for conformers of **1a** (6*S*,7*R*) and **1b** (6*R*,7*S*) at B3LYP/6-311G (d, p) level in the gas phase

| Species                       | $E'=E+ZPE$  | $E$         | $H$         | $G$         | $\Delta G(kcal/mol)$ | $\Delta E(kcal/mol)$ | PE%    |
|-------------------------------|-------------|-------------|-------------|-------------|----------------------|----------------------|--------|
| 6 <i>R</i> 7 <i>S</i> -1.out: | -883.357250 | -883.338715 | -883.337770 | -883.403363 | 0.000000             | 0.000000             | 96.34% |
| 6 <i>R</i> 7 <i>S</i> -2.out: | -883.353359 | -883.334947 | -883.334002 | -883.399681 | 0.003682             | 2.310490             | 1.95%  |
| 6 <i>R</i> 7 <i>S</i> -3.out: | -883.351231 | -883.332558 | -883.331614 | -883.397796 | 0.005567             | 3.493345             | 0.26%  |
| 6 <i>R</i> 7 <i>S</i> -4.out: | -883.351128 | -883.332434 | -883.331490 | -883.398227 | 0.005136             | 3.222889             | 0.42%  |
| 6 <i>R</i> 7 <i>S</i> -5.out: | -883.353294 | -883.334829 | -883.333885 | -883.399047 | 0.004316             | 2.708331             | 0.99%  |
| 6 <i>R</i> 7 <i>S</i> -6.out: | -883.349127 | -883.330324 | -883.329380 | -883.395961 | 0.007402             | 4.644825             | 0.04%  |
| 6 <i>S</i> 7 <i>R</i> -1.out: | -883.357250 | -883.338715 | -883.337770 | -883.403363 | 0.000000             | 0.000000             | 96.91% |
| 6 <i>S</i> 7 <i>R</i> -2.out: | -883.353359 | -883.334947 | -883.334002 | -883.399681 | 0.003682             | 2.310490             | 1.96%  |
| 6 <i>S</i> 7 <i>R</i> -3.out: | -883.351231 | -883.332558 | -883.331614 | -883.397796 | 0.005567             | 3.493345             | 0.27%  |
| 6 <i>S</i> 7 <i>R</i> -4.out: | -883.351127 | -883.332434 | -883.331490 | -883.398220 | 0.005143             | 3.227281             | 0.42%  |
| 6 <i>S</i> 7 <i>R</i> -5.out: | -883.349127 | -883.330324 | -883.329380 | -883.395961 | 0.007402             | 4.644825             | 0.04%  |
| 6 <i>S</i> 7 <i>R</i> -6.out: | -883.351128 | -883.332434 | -883.331490 | -883.398225 | 0.005138             | 3.224144             | 0.42%  |

$E$ ,  $E'$ ,  $H$ ,  $G$ : total energy, total energy with zero-point energy (ZPE), enthalpy, and Gibbs free energy

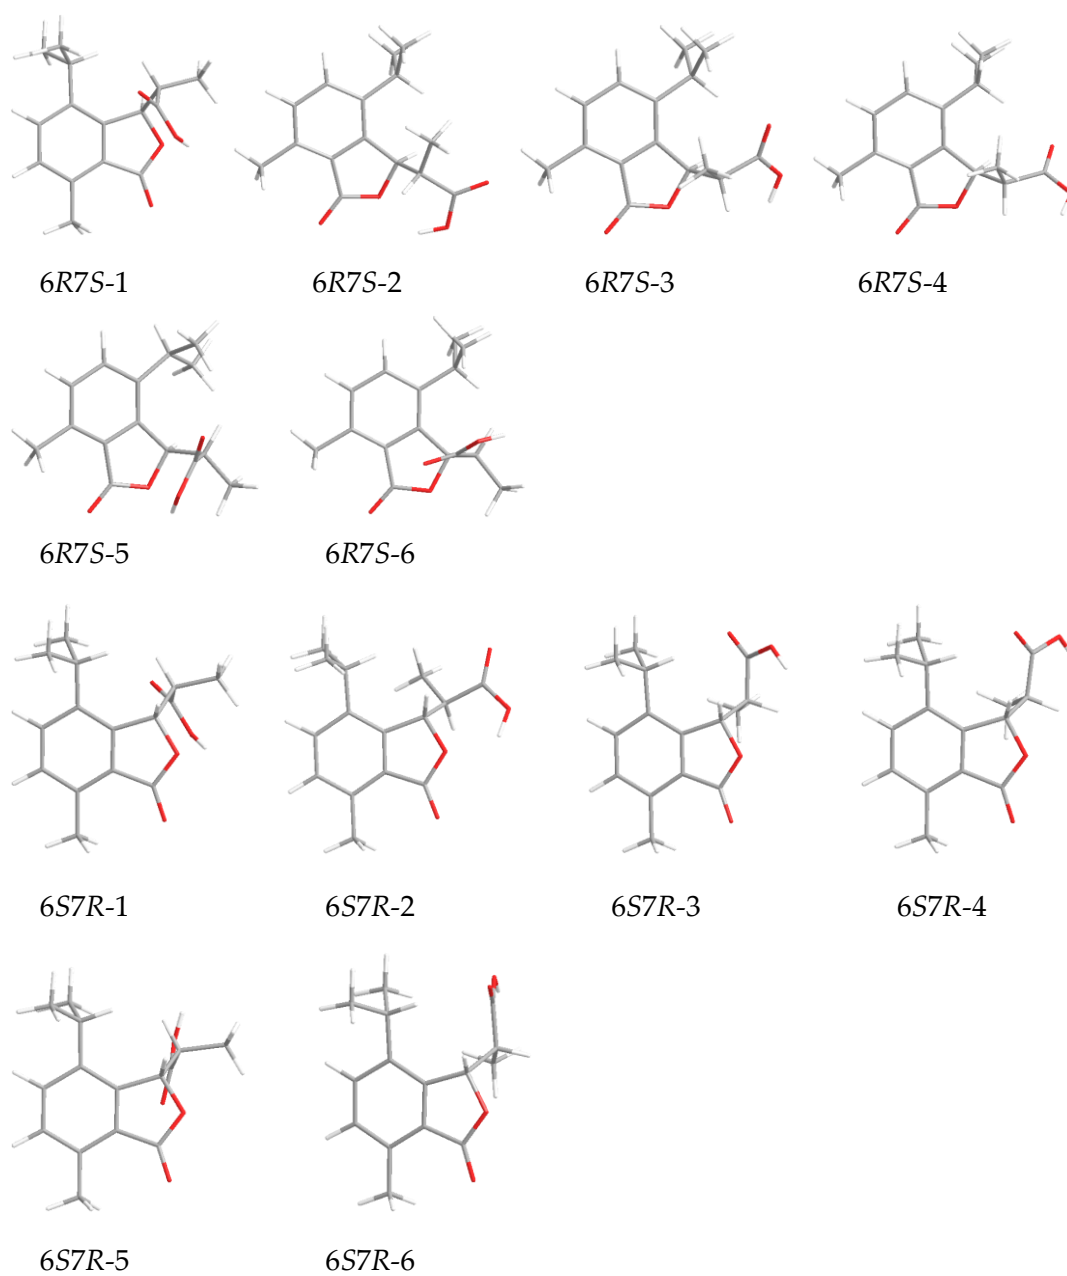

**Figure S2.** Main conformers of 6R7S and 6S7R



### S1.2. Computational details for **2** (ECD)

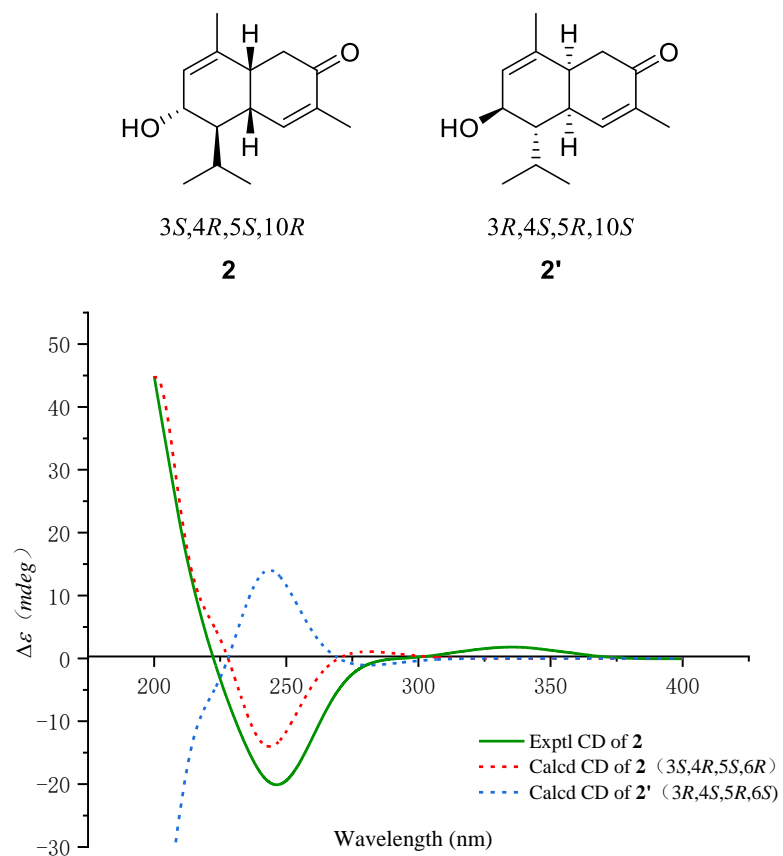

**Figure S3.** Comparison of the calculated ECD spectra for possible structure with the experimental spectrum of **2** in methanol with PCM model.

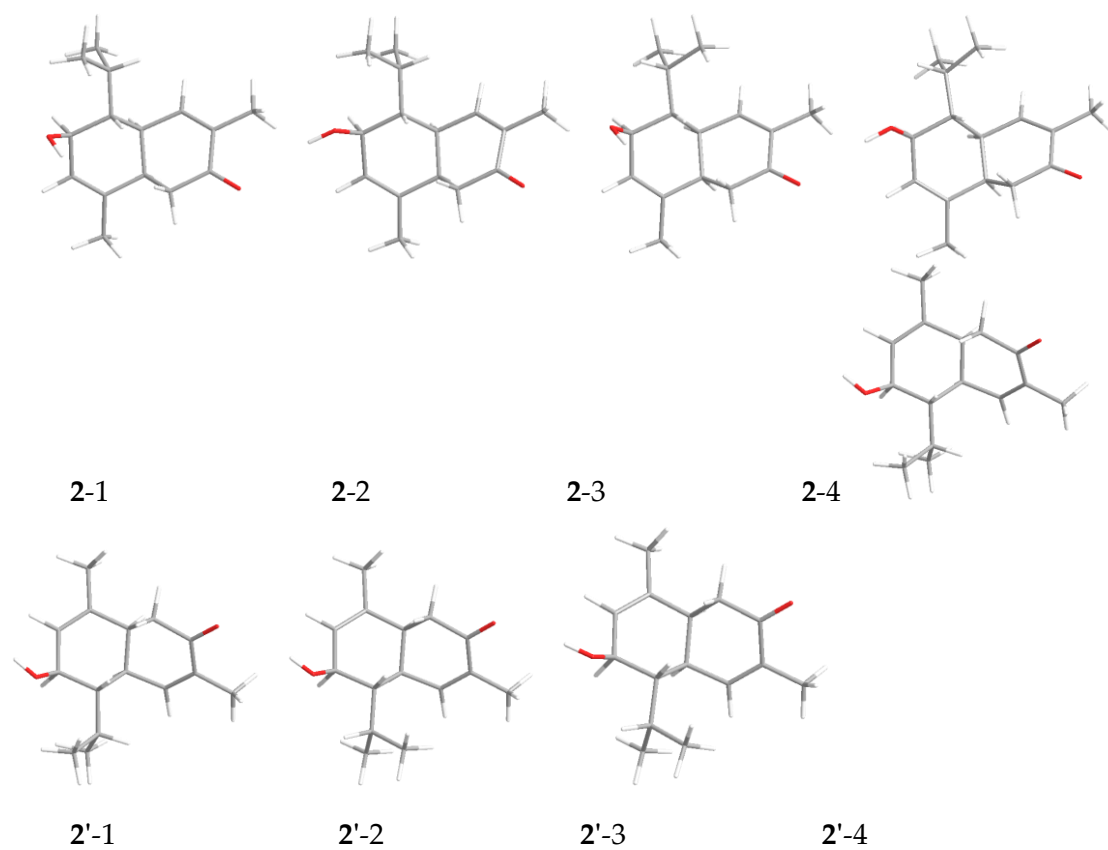

**Figure S4.** Main conformers of 2 and 2'

### S1.3. Computational details for **3** (ECD)

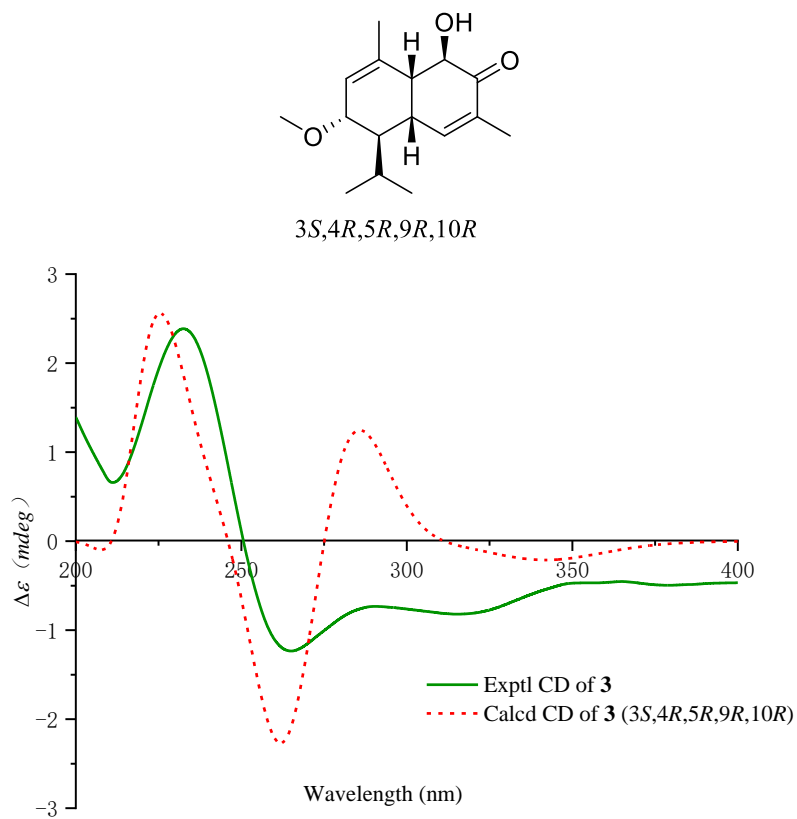

**Figure S5.** Comparison of the calculated ECD spectra for possible structure with the experimental spectrum of **3** in methanol with PCM model.

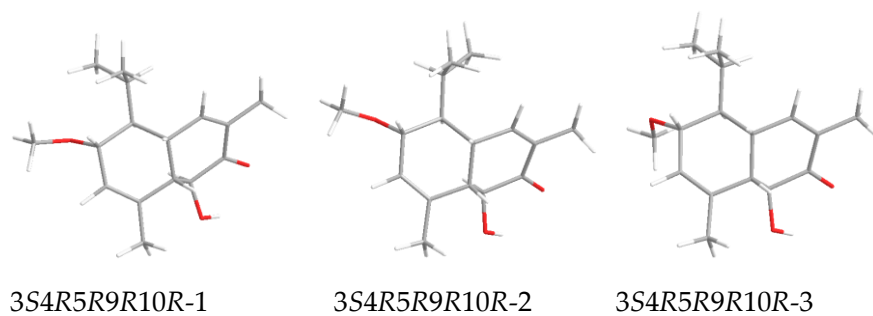

**Figure S6.** Main conformers of 3*S*4*R*5*R*9*R*10*R*.

**Table S2.** Energy analysis for conformers of **2** (3S4R5S10R) at B3LYP/6-311G (d, p) level in the gas phase

| Species          | $E'=E+ZPE$  | $E$         | $H$         | $G$         | $\Delta G(kcal/mol)$ | $\Delta E(kcal/mol)$ | PE%    |
|------------------|-------------|-------------|-------------|-------------|----------------------|----------------------|--------|
| 3S4R5S10R-1.out: | -735.005251 | -734.987719 | -734.986775 | -735.049735 | 0.000000             | 0.000000             | 57.81% |
| 3S4R5S10R-2.out: | -735.002565 | -734.984907 | -734.983962 | -735.047466 | 0.002269             | 1.423819             | 5.22%  |
| 3S4R5S10R-3.out: | -735.005259 | -734.987755 | -734.986811 | -735.049240 | 0.000495             | 0.310617             | 34.21% |
| 3S4R5S10R-4.out: | -735.002691 | -734.985047 | -734.984103 | -735.046862 | 0.002873             | 1.802835             | 2.75%  |
| 3R4S5R10S-1.out: | -734.062317 | -734.044817 | -734.043873 | -734.106993 | 0.000000             | 0.000000             | 72.05% |
| 3R4S5R10S-2.out: | -734.060257 | -734.042690 | -734.041746 | -734.104736 | 0.002257             | 1.416289             | 6.59%  |
| 3R4S5R10S-3.out: | -734.061789 | -734.044317 | -734.043373 | -734.105712 | 0.001281             | 0.803840             | 18.54% |
| 3R4S5R10S-4.out: | -734.059816 | -734.042206 | -734.041261 | -734.103939 | 0.003054             | 1.916414             | 2.83%  |

**Table S3.** Energy analysis for conformers of **3** (3S4R5R9R10R) at B3LYP/6-311G (d, p) level in the gas phase

| Species            | $E'=E+ZPE$ | $E$         | $H$         | $G$         | $\Delta G(kcal/mol)$ | $\Delta E(kcal/mol)$ | PE%    |
|--------------------|------------|-------------|-------------|-------------|----------------------|----------------------|--------|
| 3S4R5R9R10R-1.out: | 848.563791 | -848.544292 | -848.543348 | -848.610356 | 0.001450             | 0.909889             | 11.32% |
| 3S4R5R9R10R-2.out: | 848.564319 | -848.544504 | -848.543559 | -848.611448 | 0.000358             | 0.224648             | 36.03% |
| 3S4R5R9R10R-3.out: | 848.564766 | -848.545156 | -848.544212 | -848.611806 | 0.000000             | 0.000000             | 52.65% |

$E$ ,  $E'$ ,  $H$ ,  $G$ : total energy, total energy with zero-point energy (ZPE), enthalpy, and Gibbs free energy

#### S1.4. Computational details for **6** (ECD)

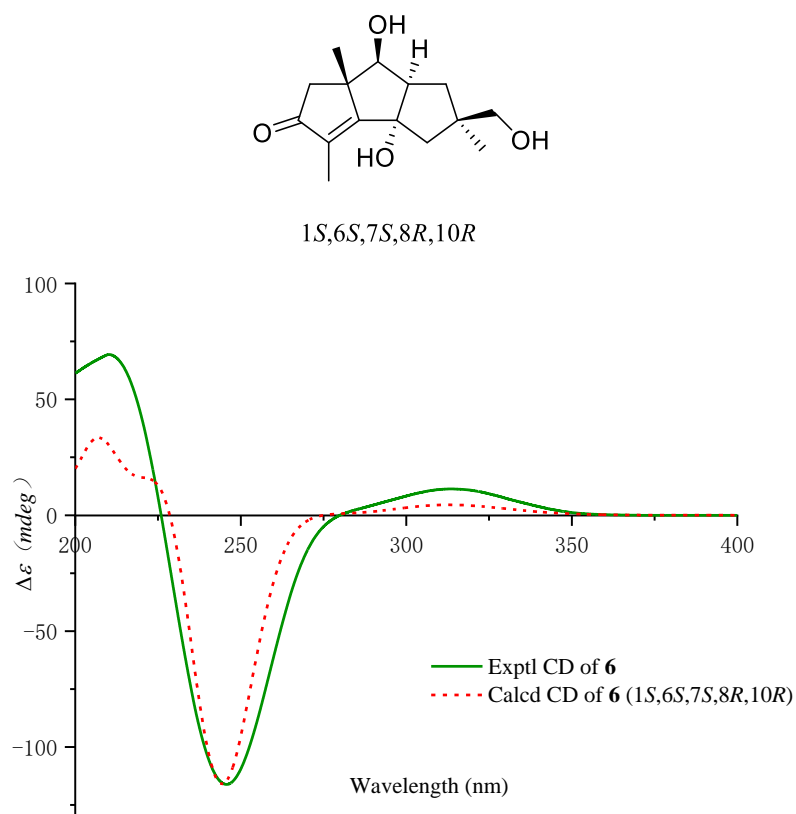

**Figure S7.** Comparison of the calculated ECD spectra for possible structure with the experimental spectrum of **6** in methanol with PCM model

**Table S4.** Energy analysis for conformers of **6** (6S7S8S10R) at B3LYP/6-311G (d, p) level in the gas phase

| Species            | $E'=E+ZPE$ | $E$         | $H$         | $G$         | $\Delta G(kcal/mol)$ | $\Delta E(kcal/mol)$ | PE%    |
|--------------------|------------|-------------|-------------|-------------|----------------------|----------------------|--------|
| 1S6S7S8R10R-1.out: | 885.430857 | -885.411688 | -885.410744 | -885.476233 | 0.003444             | 2.161143             | 1.24%  |
| 1S6S7S8R10R-2.out: | 885.432722 | -885.413560 | -885.412616 | -885.477981 | 0.001696             | 1.064256             | 7.91%  |
| 1S6S7S8R10R-3.out: | 885.434557 | -885.415464 | -885.414519 | -885.479677 | 0.000000             | 0.000000             | 47.73% |
| 1S6S7S8R10R-4.out: | 885.430334 | -885.411161 | -885.410217 | -885.475683 | 0.003994             | 2.506273             | 0.69%  |
| 1S6S7S8R10R-5.out: | 885.430688 | -885.411505 | -885.410561 | -885.476070 | 0.003607             | 2.263427             | 1.04%  |
| 1S6S7S8R10R-6.out: | 885.431272 | -885.412181 | -885.411237 | -885.476612 | 0.003065             | 1.923317             | 1.85%  |
| 1S6S7S8R10R-7.out: | 885.432170 | -885.413078 | -885.412134 | -885.477358 | 0.002319             | 1.455195             | 4.09%  |
| 1S6S7S8R10R-8.out: | 885.429418 | -885.410209 | -885.409264 | -885.474934 | 0.004743             | 2.976278             | 0.31%  |
| 1S6S7S8R10R-9.out: | 885.433371 | -885.414377 | -885.413433 | -885.478403 | 0.001274             | 0.799447             | 12.37% |

**Table S5.** Energy analysis for conformers of **7** (6S7S8S10R) at B3LYP/6-311G (d, p) level in the gas phase

| Species          | $E'=E+ZPE$  | $E$         | $H$         | $G$         | $\Delta G(kcal/mol)$ | $\Delta E(kcal/mol)$ | PE%    |
|------------------|-------------|-------------|-------------|-------------|----------------------|----------------------|--------|
| 6S7S8S10R-1.out: | -808.009663 | -807.991905 | -807.990961 | -808.054232 | 0.000000             | 0.000000             | 47.73% |
| 6S7S8S10R-2.out: | -808.006822 | -807.989028 | -807.988084 | -808.051349 | 0.002883             | 1.809110             | 2.25%  |
| 6S7S8S10R-3.out: | -808.009300 | -807.991625 | -807.990680 | -808.053428 | 0.000804             | 0.504518             | 20.36% |
| 6S7S8S10R-4.out: | -808.007265 | -807.989392 | -807.988448 | -808.052180 | 0.002052             | 1.287649             | 5.42%  |
| 6S7S8S10R-5.out: | -808.009488 | -807.991824 | -807.990880 | -808.053593 | 0.000639             | 0.400979             | 24.25% |

$E$ ,  $E'$ ,  $H$ ,  $G$ : total energy, total energy with zero-point energy (ZPE), enthalpy, and Gibbs free energy

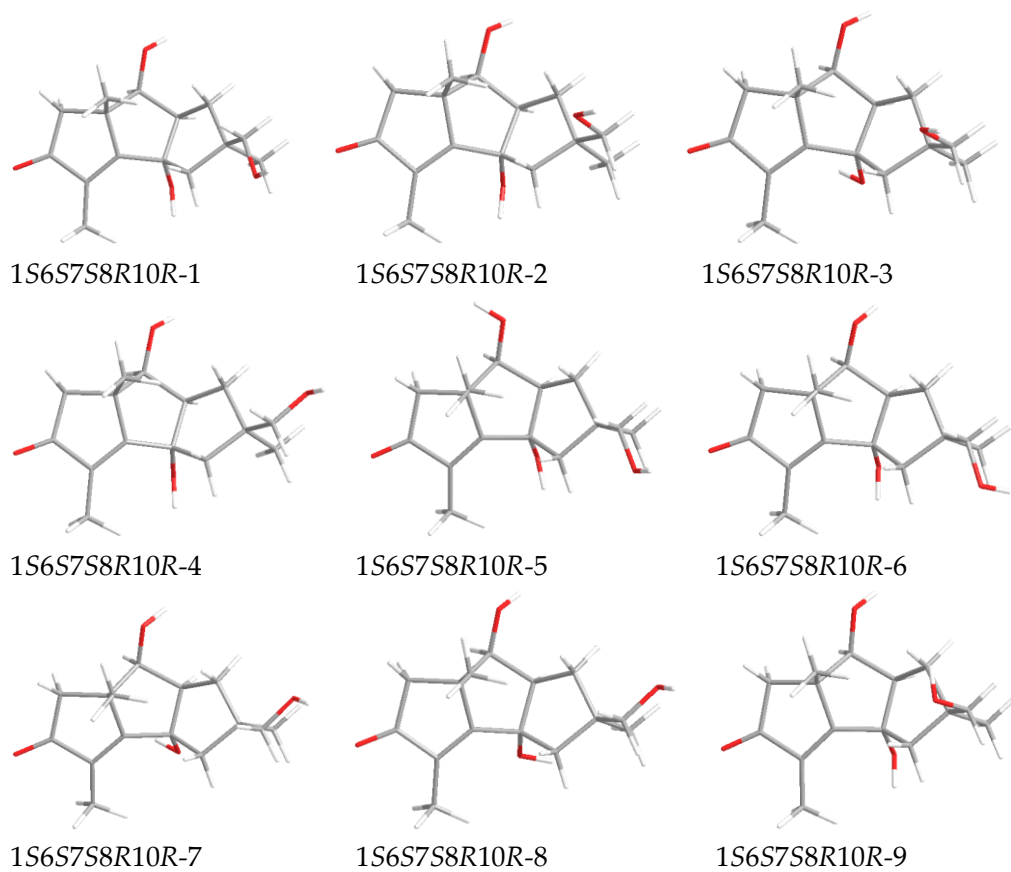

**Figure S8.** Comparison of the calculated ECD spectra for possible structure with the experimental spectrum of 6 in methanol with PCM model

### S1.5. Computational details for **7** (ECD)

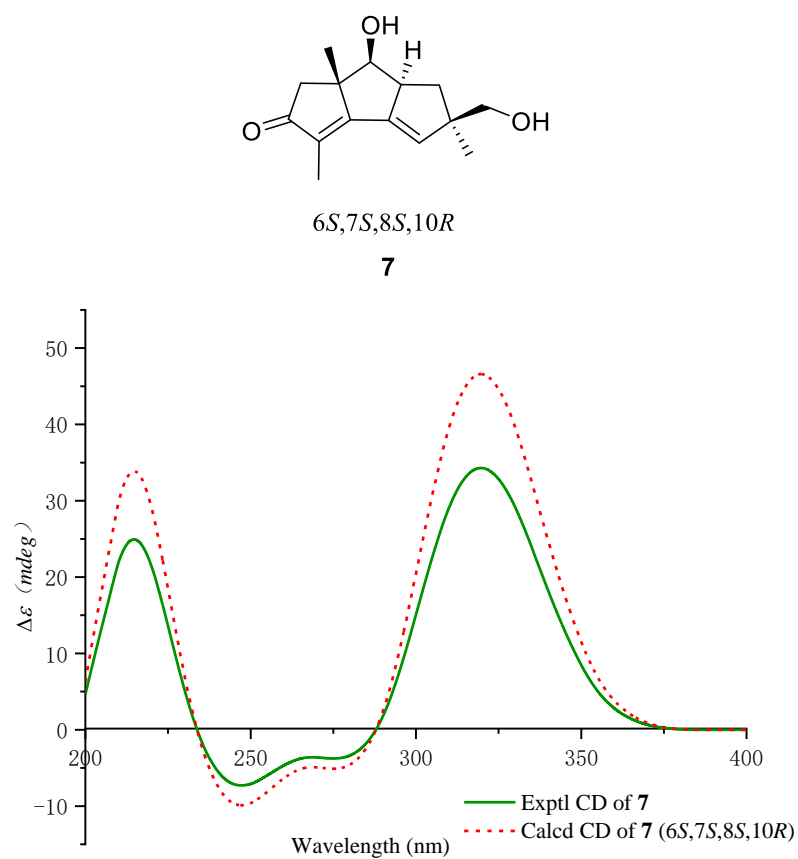

**Figure S9.** Comparison of the calculated ECD spectra for possible structure with the experimental spectrum of **7** in methanol with PCM model.



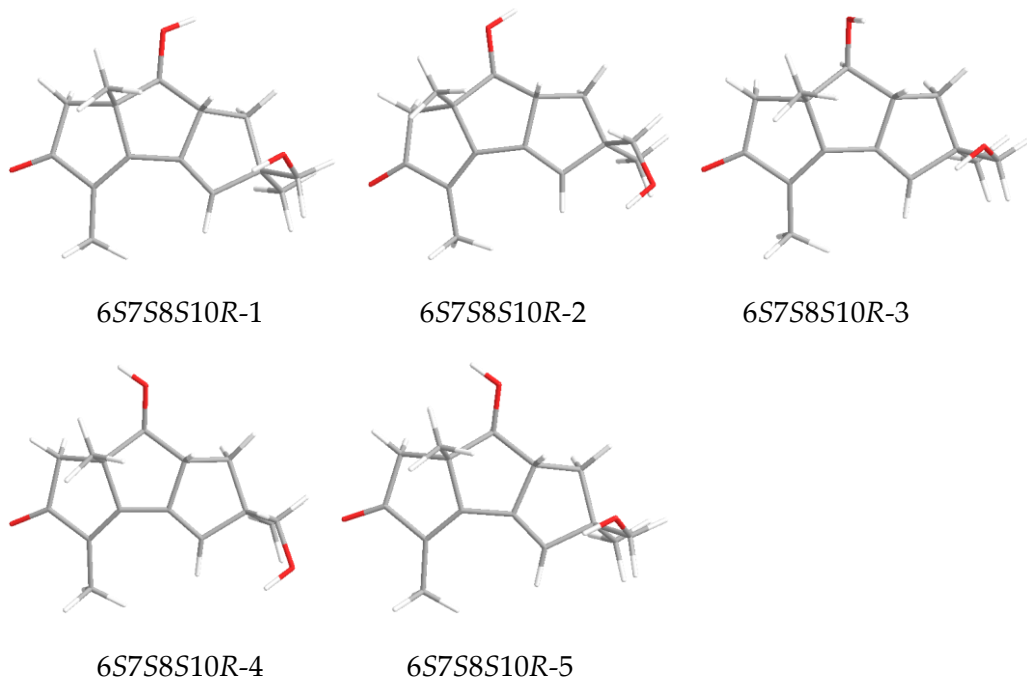

**Figure S10.** Main conformers of 6S7S8S10R

## Sections S2. X-Ray details

### S2.1 X-Ray details for albocinnamin A (1a/1b)

Crystal data for compound **1a/1b**: approximate dimensions 0.600 mm × 0.130 mm × 0.110 mm, was used for the X-ray crystallographic analysis on the BRUKER D8 QUEST. C<sub>15</sub>H<sub>18</sub>O<sub>4</sub>, (*M* = 262.29 g/mol): monoclinic, space group Pbca, *a* = 11.1153(5) Å, *b* = 13.4703(6) Å, *c* = 18.6151(8) Å,  $\alpha = 90^\circ$ ,  $\beta = 90^\circ$ ,  $\gamma = 90^\circ$ , *V* = 2787.2(2) Å<sup>3</sup>, *Z* = 8, *T* = 100(2) K,  $\mu(\text{Cu K}\alpha) = 0.739 \text{ mm}^{-1}$ , *D*<sub>calc</sub> = 1.250 mg/m<sup>3</sup>, 22765 reflections measured, 2749 independent reflections (*R*<sub>int</sub> = 0.0608). The final *R*<sub>1</sub> was 0.0347 (*I* > 2σ(*I*)), and *wR*(*F*<sup>2</sup>) was 0.0923 (*I* > 2σ(*I*)). The final *R*<sub>1</sub> was 0.0456 (all data), and *wR*(*F*<sup>2</sup>) was 0.0962 (all data).

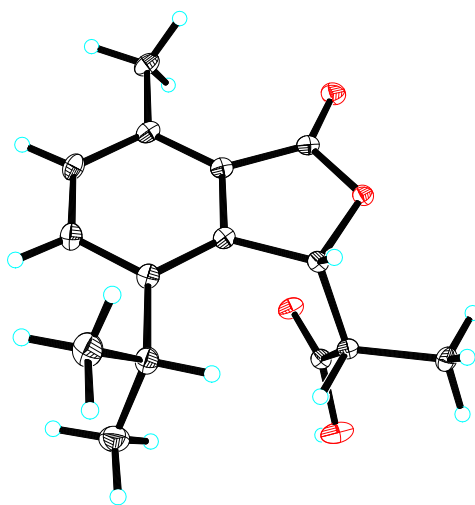

**Figure S11.** View of a molecule of **1a/1b** with the atom-labelling scheme.

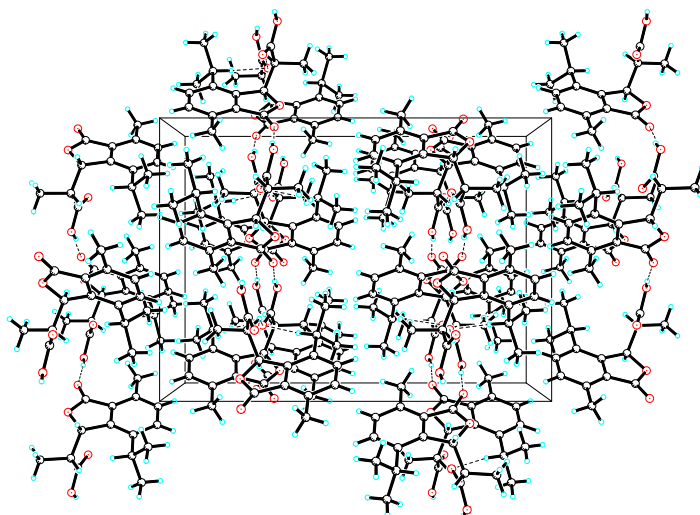

**Figure S12.** View of the pack drawing of **1a/1b**. Hydrogen-bonds are shown as dashed lines.

## S2.2 X-Ray details for albocinnamin E (5)

Crystal data for compound **5**: approximate dimensions 0.820 mm × 0.570 mm × 0.440 mm, was used for the X-ray crystallographic analysis on the BRUKER D8 QUEST. C<sub>15</sub>H<sub>22</sub>O<sub>3</sub>, (*M* = 250.32 g/mol): monoclinic, space group P2<sub>1</sub>2<sub>1</sub>2<sub>1</sub>, *a* = 7.7864(4) Å, *b* = 9.0991(4) Å, *c* = 19.0099(9) Å,  $\alpha = 90^\circ$ ,  $\beta = 90^\circ$ ,  $\gamma = 90^\circ$ , *V* = 1346.84(11) Å<sup>3</sup>, *Z* = 4, *T* = 100(2) K,  $\mu(\text{Cu K}\alpha) = 0.676 \text{ mm}^{-1}$ , *D*<sub>calc</sub> = 1.235 mg/m<sup>3</sup>, 12794 reflections measured, 2639 independent reflections (*R*<sub>int</sub> = 0.0419). The final *R*<sub>1</sub> was 0.0309 (*I* > 2σ(*I*)), and *wR*(*F*<sup>2</sup>) was 0.0806 (*I* > 2σ(*I*)). The final *R*<sub>1</sub> was 0.0312 (all data), and *wR*(*F*<sup>2</sup>) was 0.0808 (all data). Flack parameter = 0.01(5).

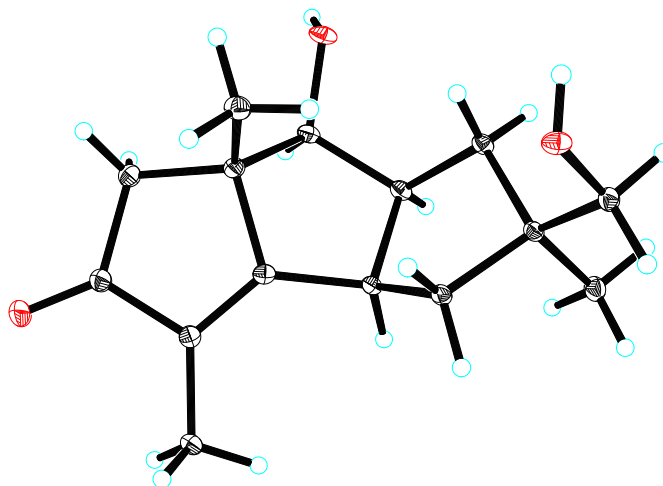

**Figure S13.** View of a molecule of **5** with the atom-labelling scheme.

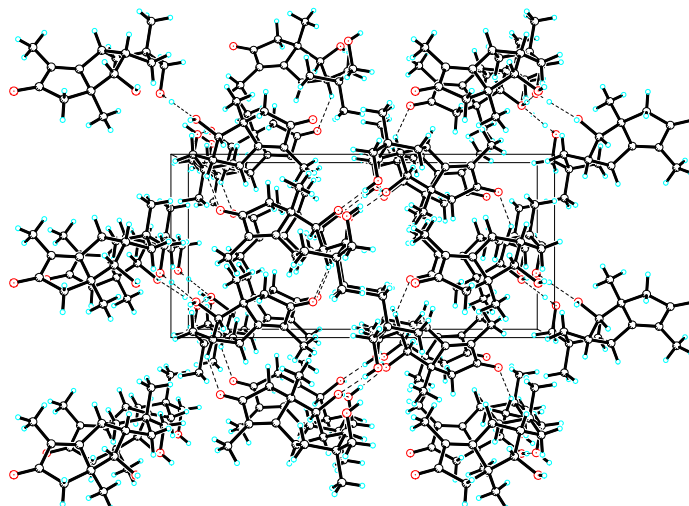

**Figure S14.** View of the pack drawing of **5**. Hydrogen-bonds are shown as dashed lines.

## Sections S3. Supplementary of NMR and HRESIMS

### S3.1 NMR and HRESIMS spectra of albocinnamin A (1a/1b)

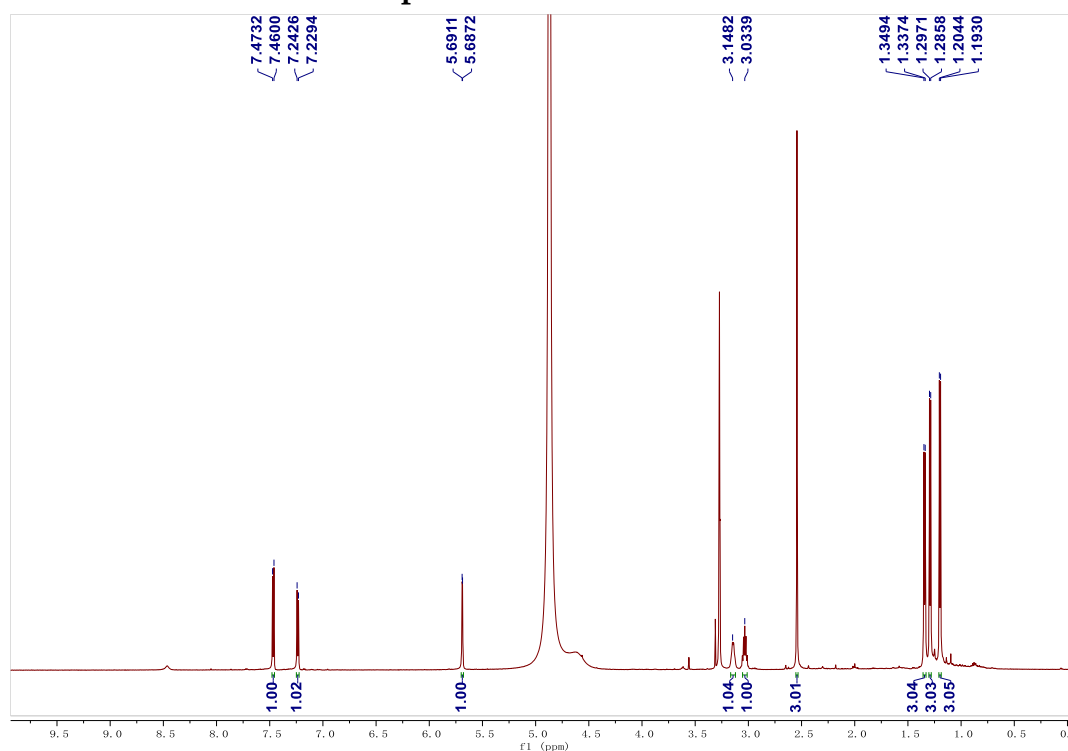

Figure S15. <sup>1</sup>H NMR spectrum of compound 1. (600 MHz, methanol-*d*<sub>4</sub>)

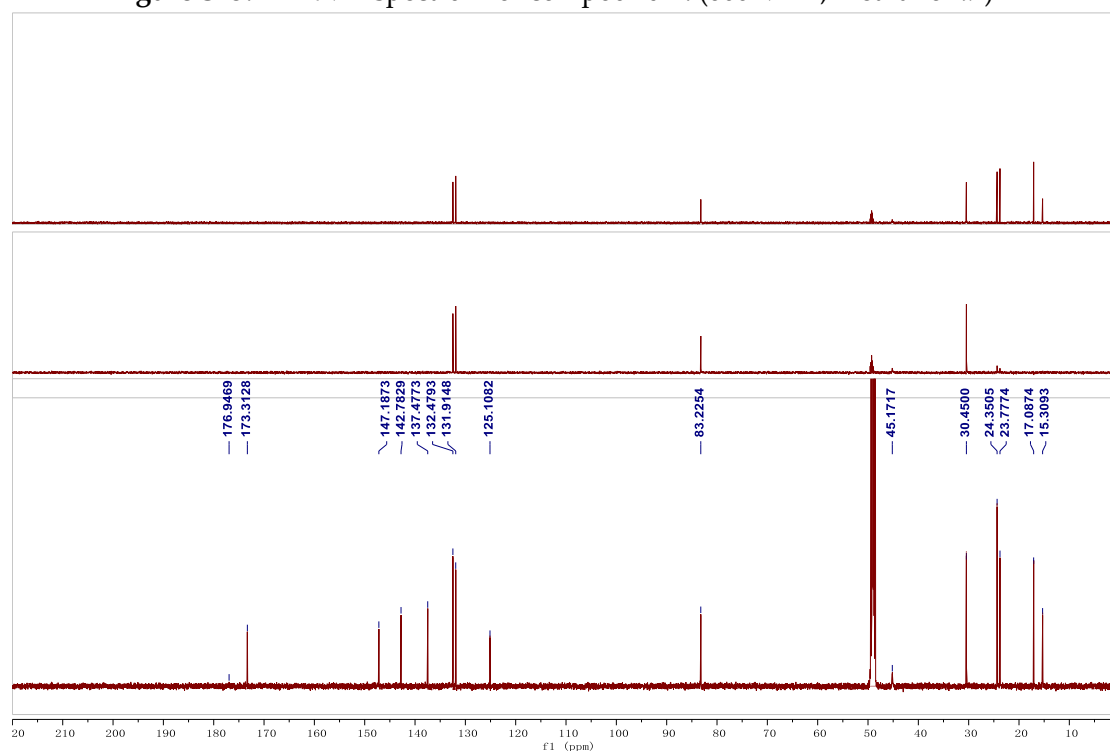

Figure S16. <sup>13</sup>C NMR spectrum of compound 1. (150 MHz, methanol-*d*<sub>4</sub>)

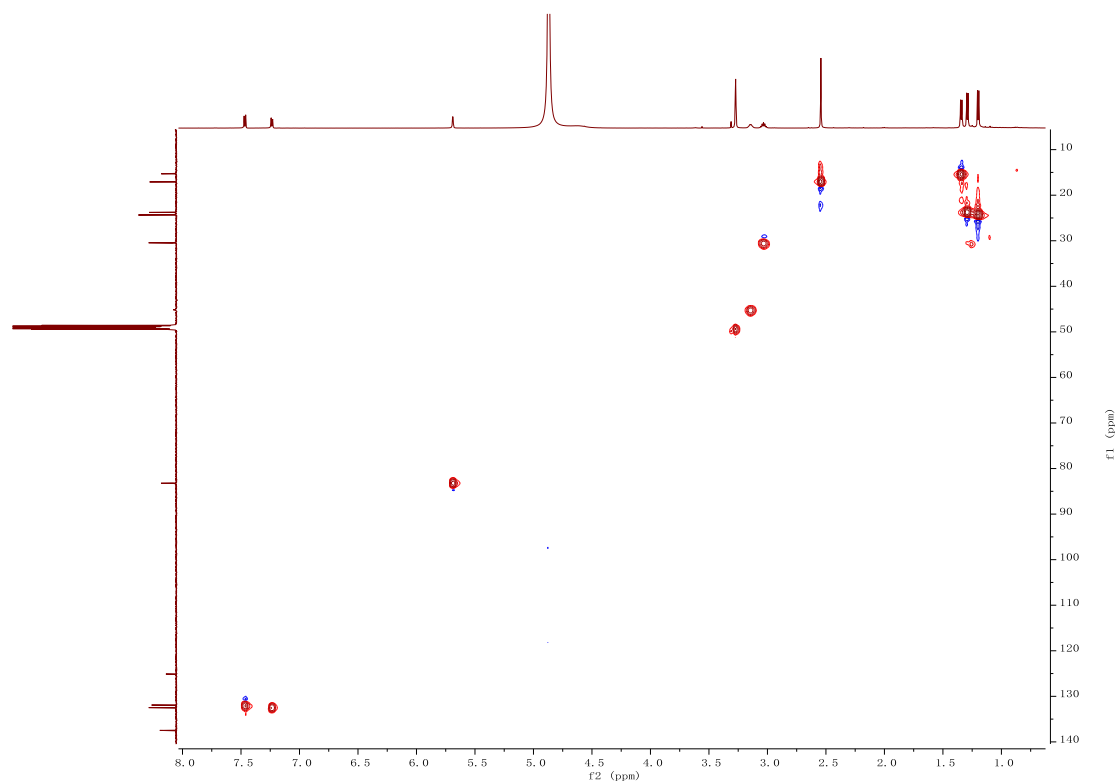

Figure S17. HSQC spectrum of compound 1

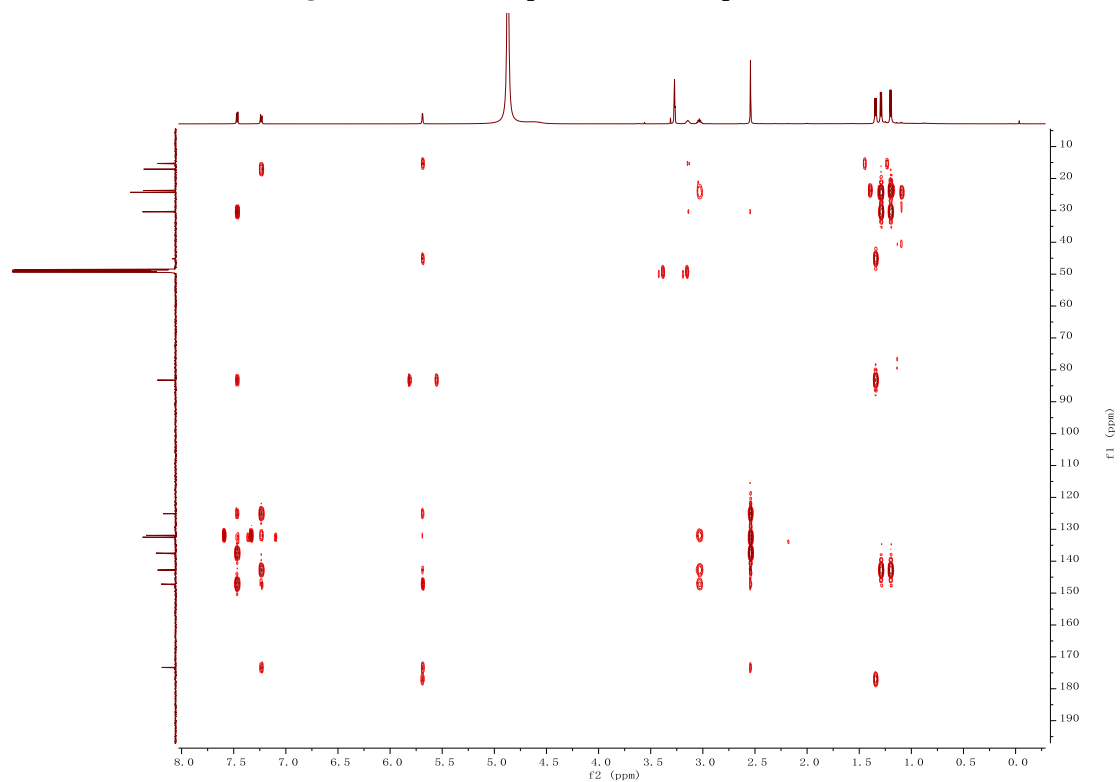

Figure S18. HMBC spectrum of compound 1

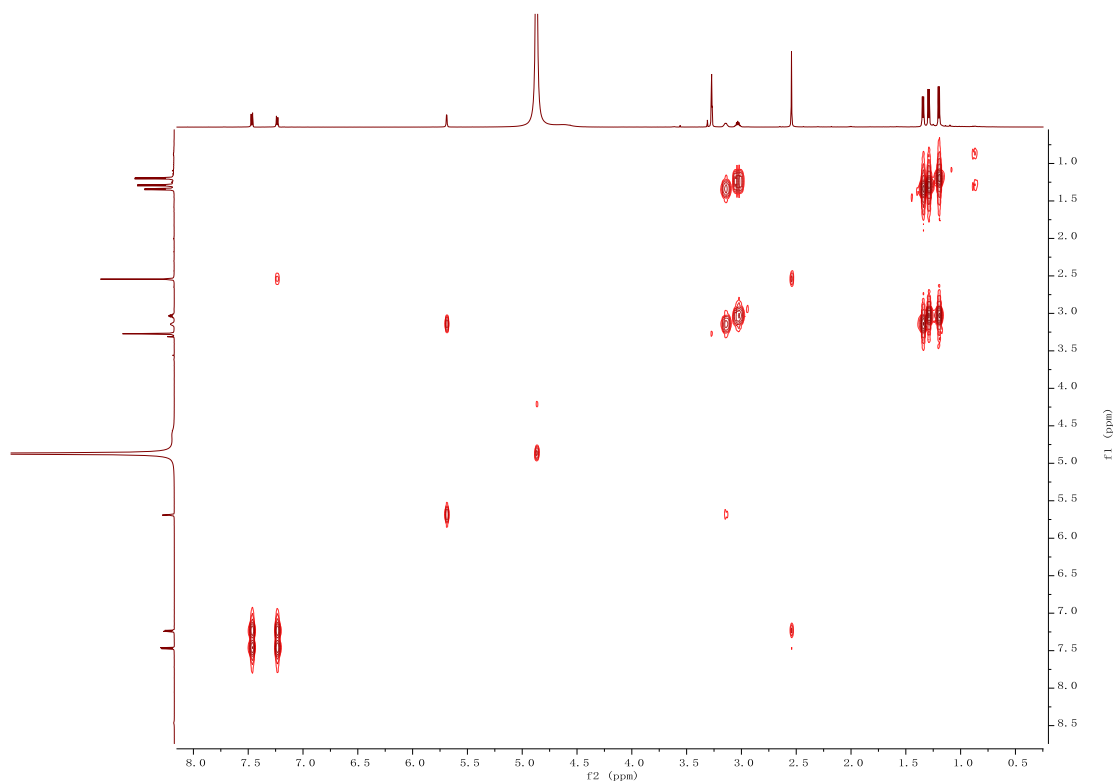

**Figure S19.**  $^1\text{H}$ - $^1\text{H}$  COSY spectrum of compound **1**

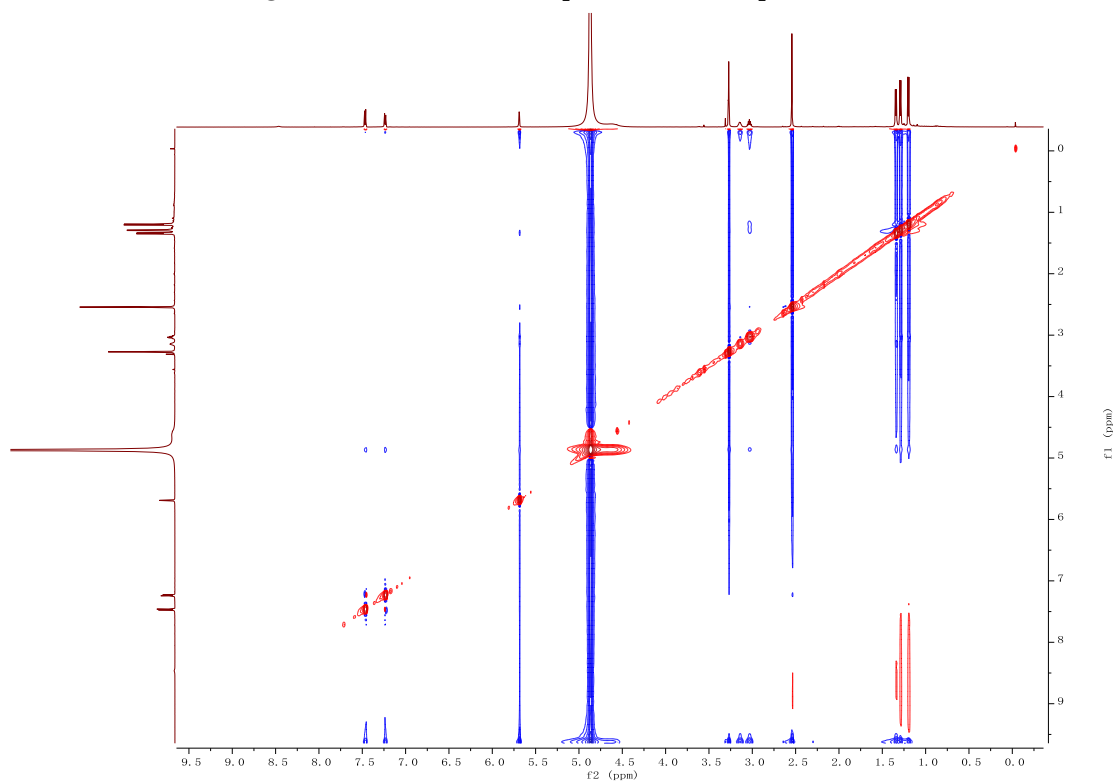

**Figure S20.** ROESY spectrum of compound **1**

T: FTMS + p ESI Full lock ms [50.0000-750.0000]

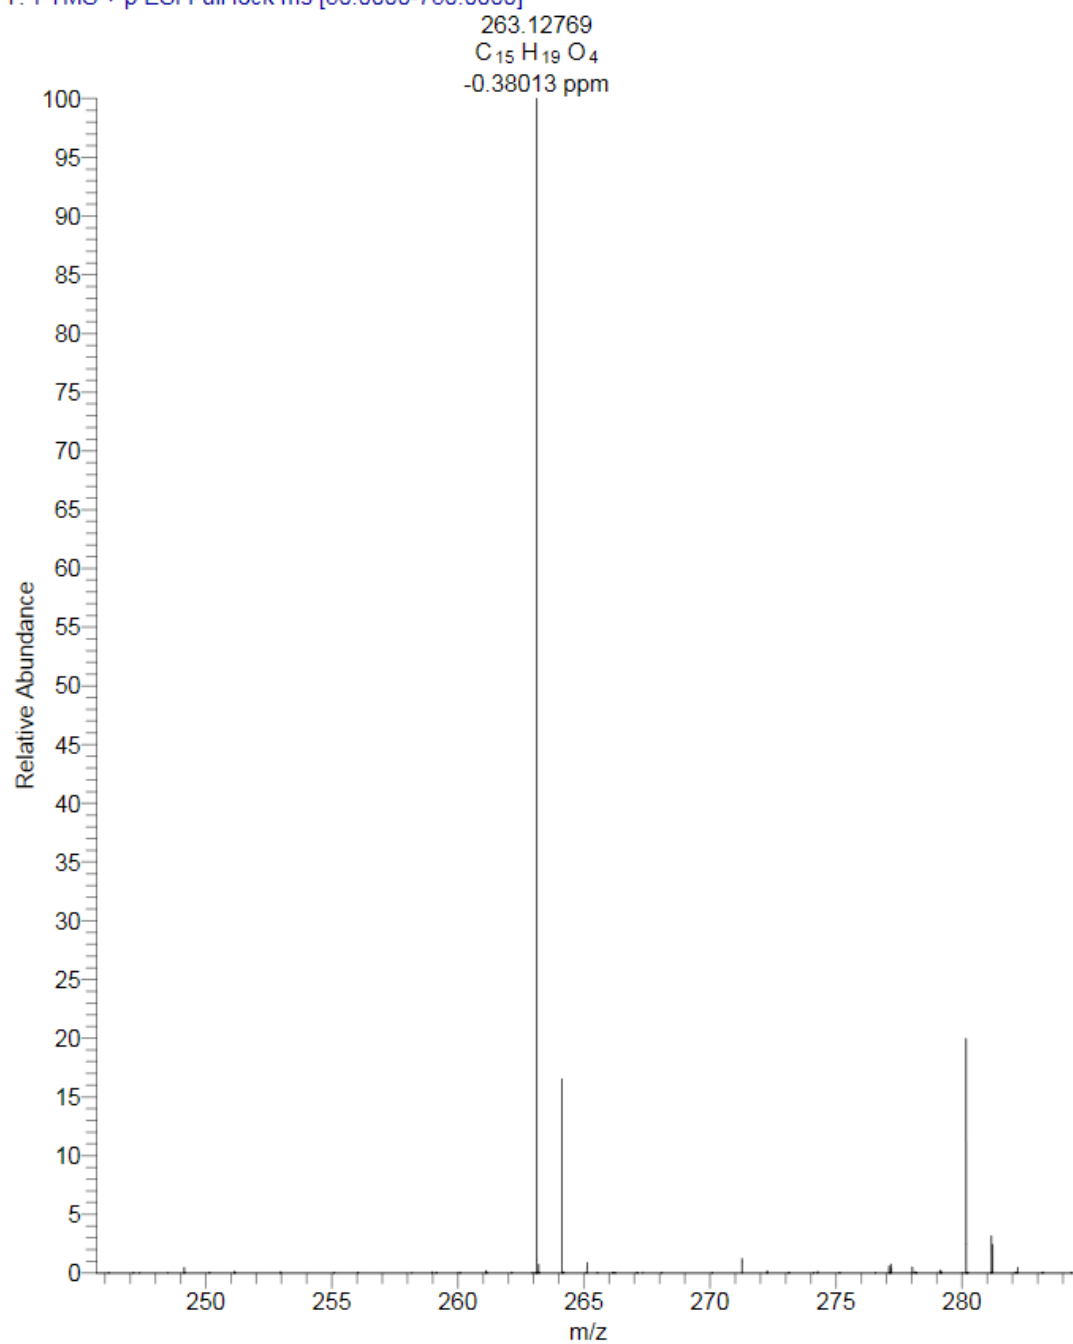

**Figure S21.** HRESIMS data of compound **1**

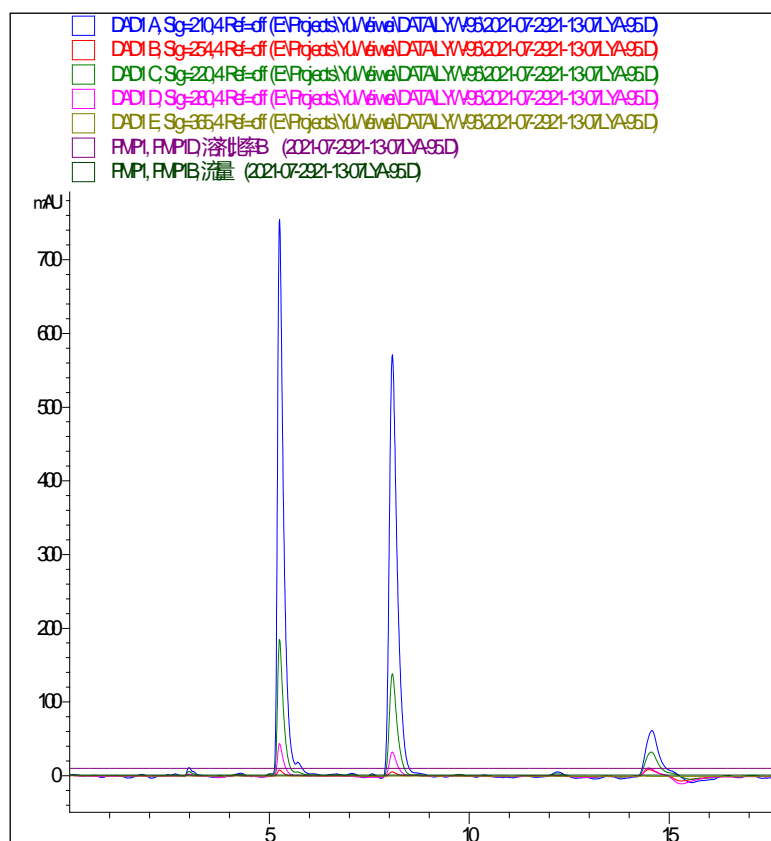

**Figure S22.** Chiral HPLC analysis of compound **1**



### S3.2 NMR and HRESIMS spectra of albocinnamin B (2)

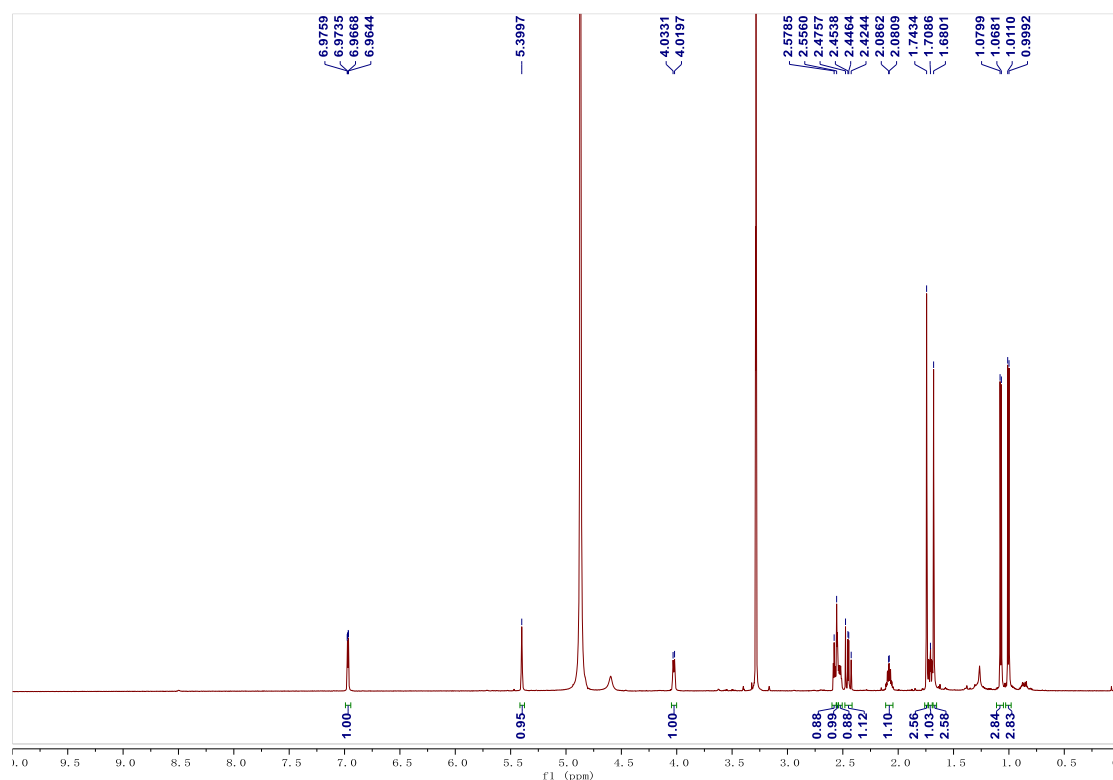

Figure S23. <sup>1</sup>H NMR spectrum of compound 2. (600 MHz, methanol-*d*<sub>4</sub>)

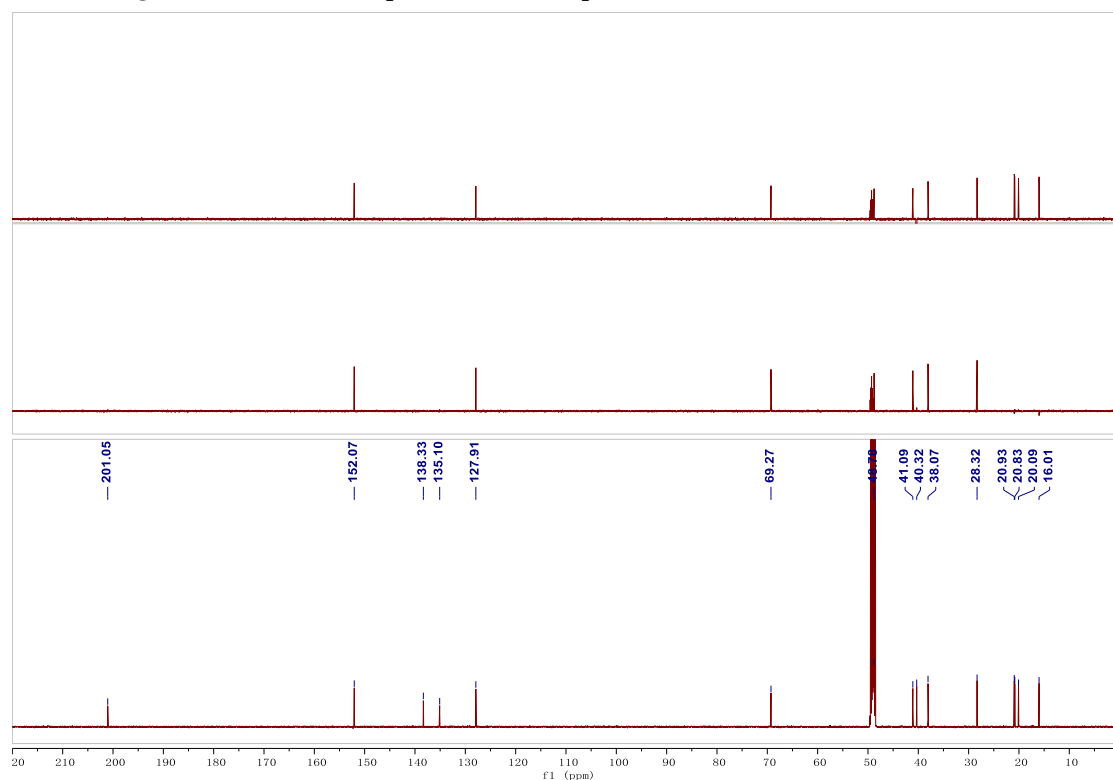

Figure S24. <sup>13</sup>C NMR spectrum of compound 2. (150 MHz, methanol-*d*<sub>4</sub>)

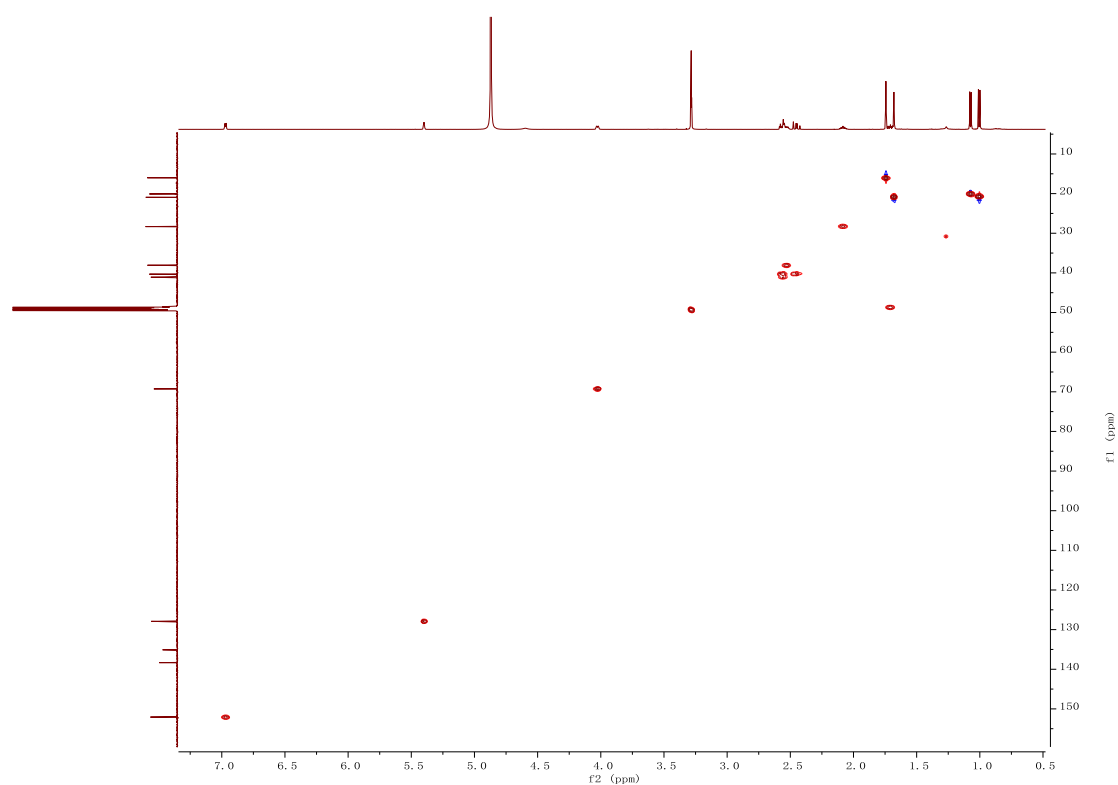

**Figure S25.** HSQC spectrum of compound **2**

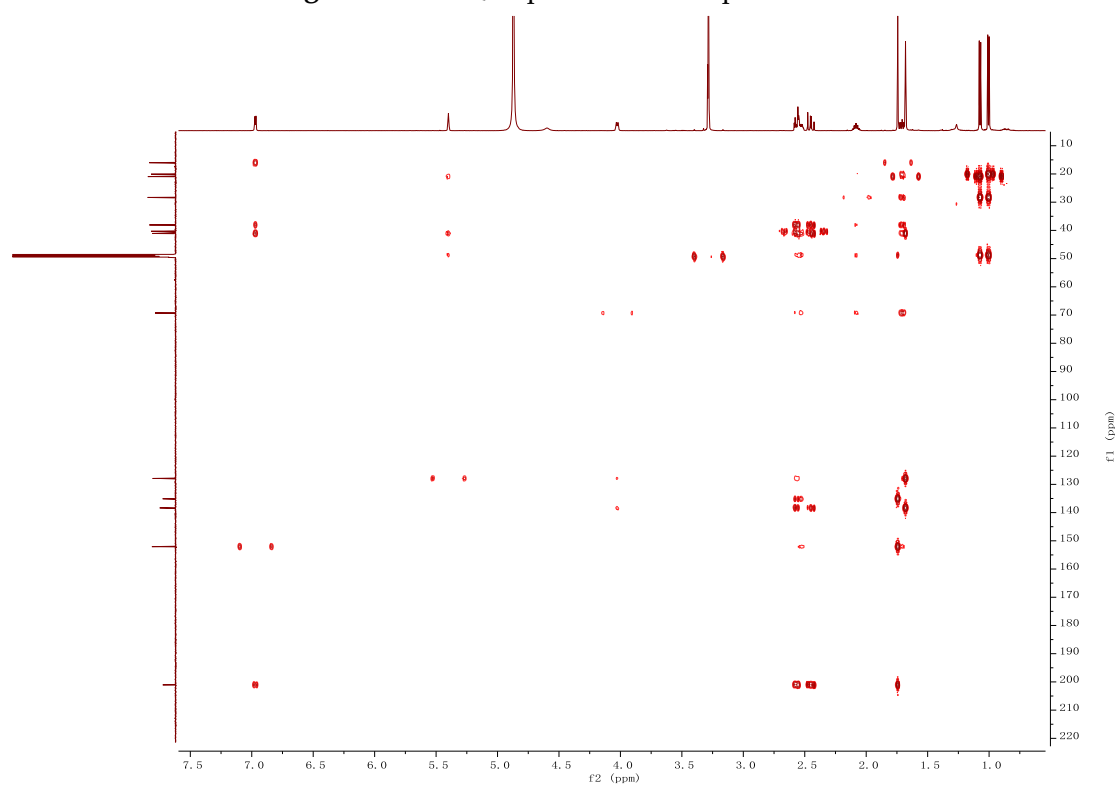

**Figure S26.** HMBC spectrum of compound **2**

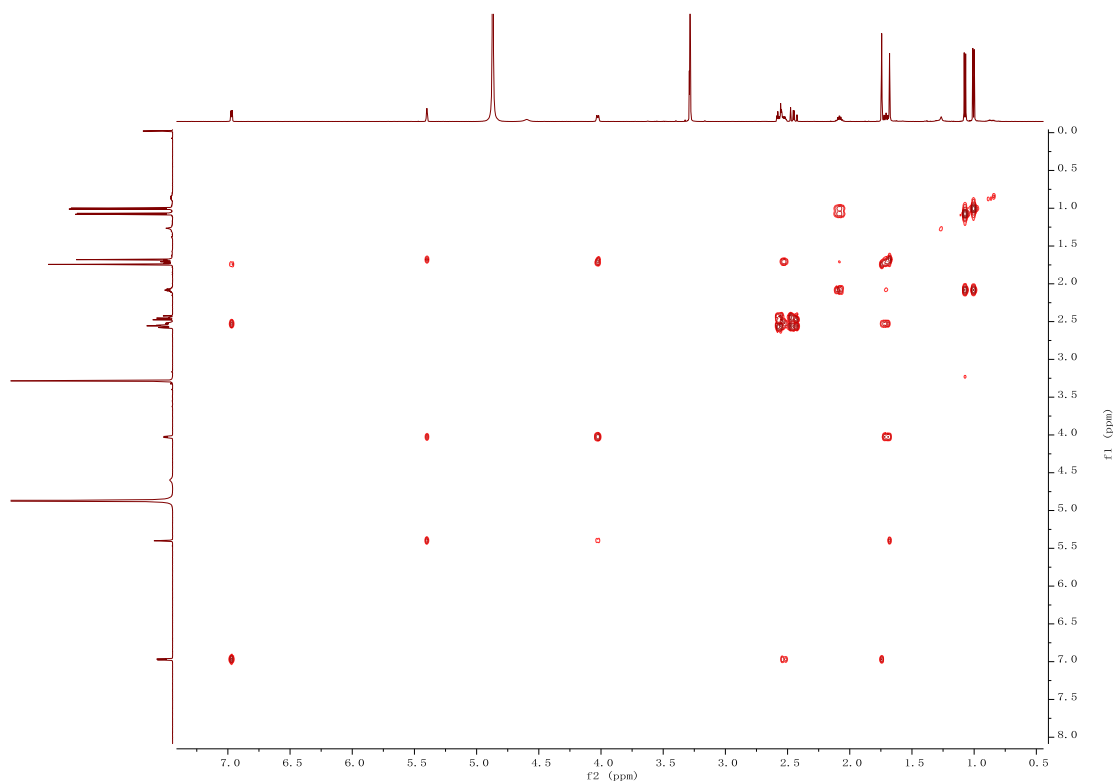

**Figure S27.**  $^1\text{H}$ - $^1\text{H}$  COSY spectrum of compound **2**

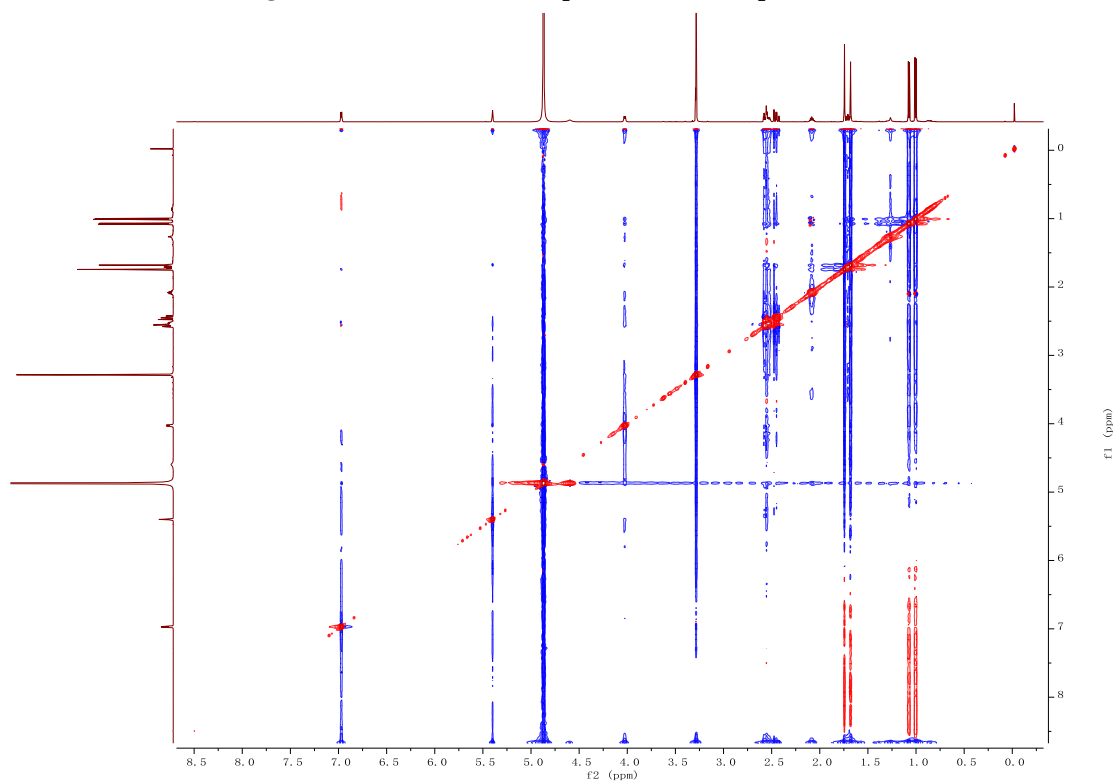

**Figure S28.** ROESY spectrum of compound **2**

T: FTMS + p ESI Full lock ms [150.0000-1100.0000]

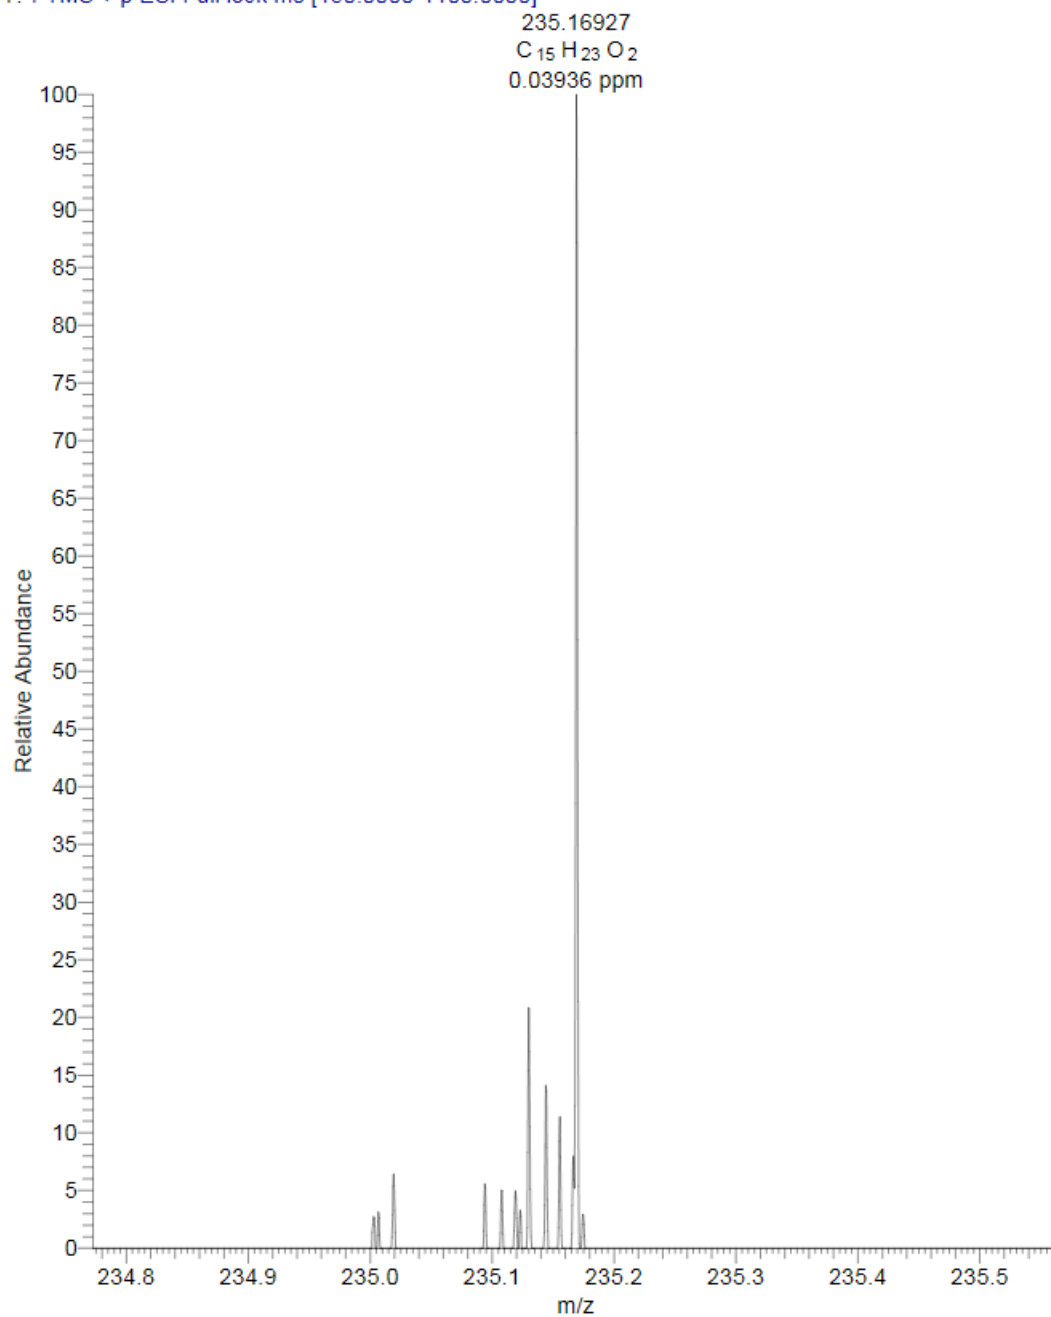

Figure S29. HRESIMS data of compound 2

### S3.3 NMR and HRESIMS spectra of albocinnamin C (3)

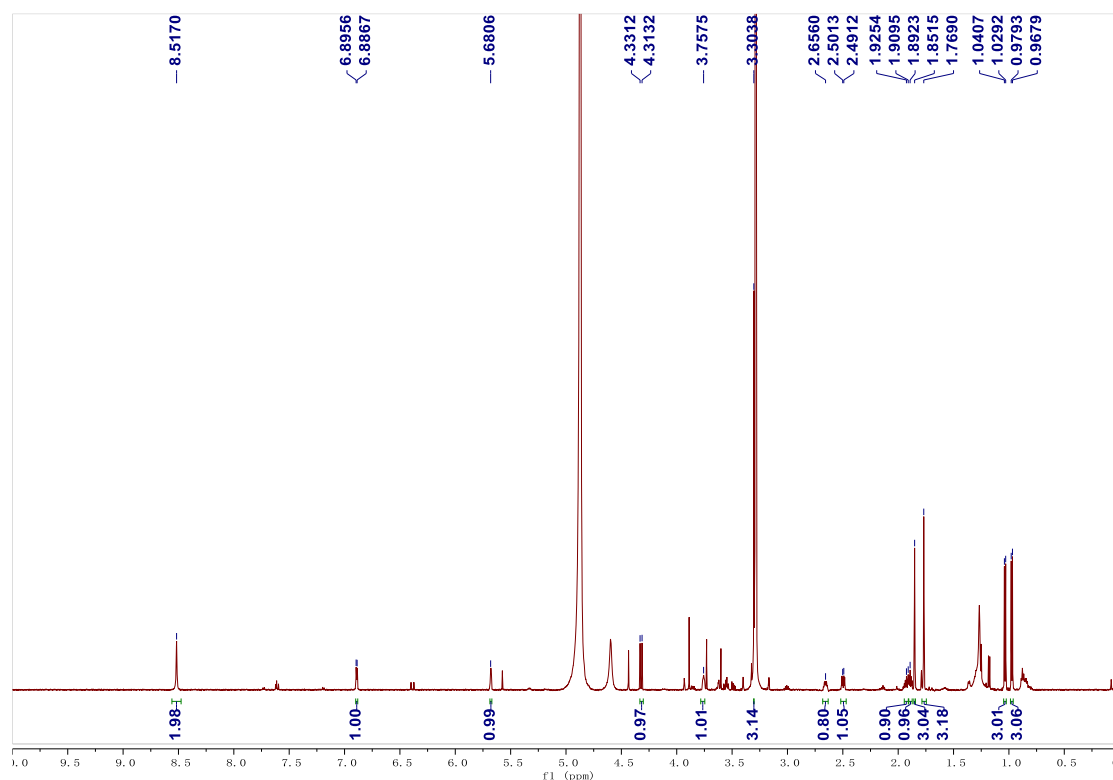

Figure S30. <sup>1</sup>H NMR spectrum of compound 3. (600 MHz, methanol-*d*<sub>4</sub>)

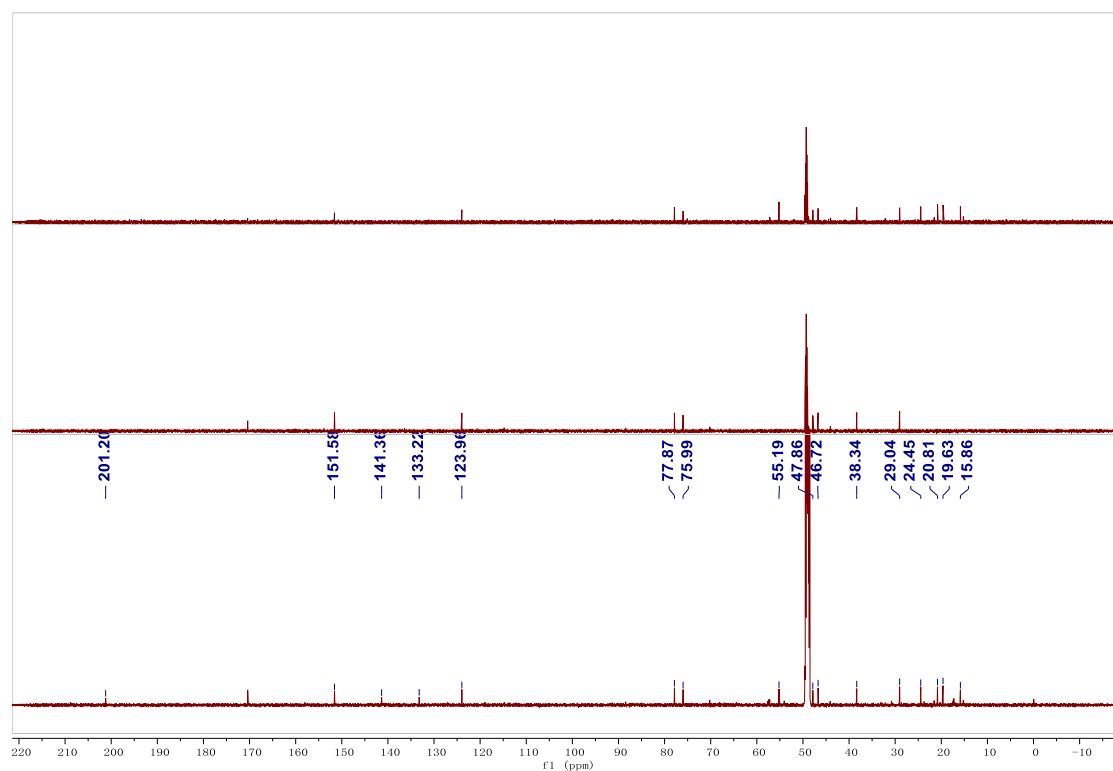

Figure S31. <sup>13</sup>C NMR spectrum of compound 3. (150 MHz, methanol-*d*<sub>4</sub>)

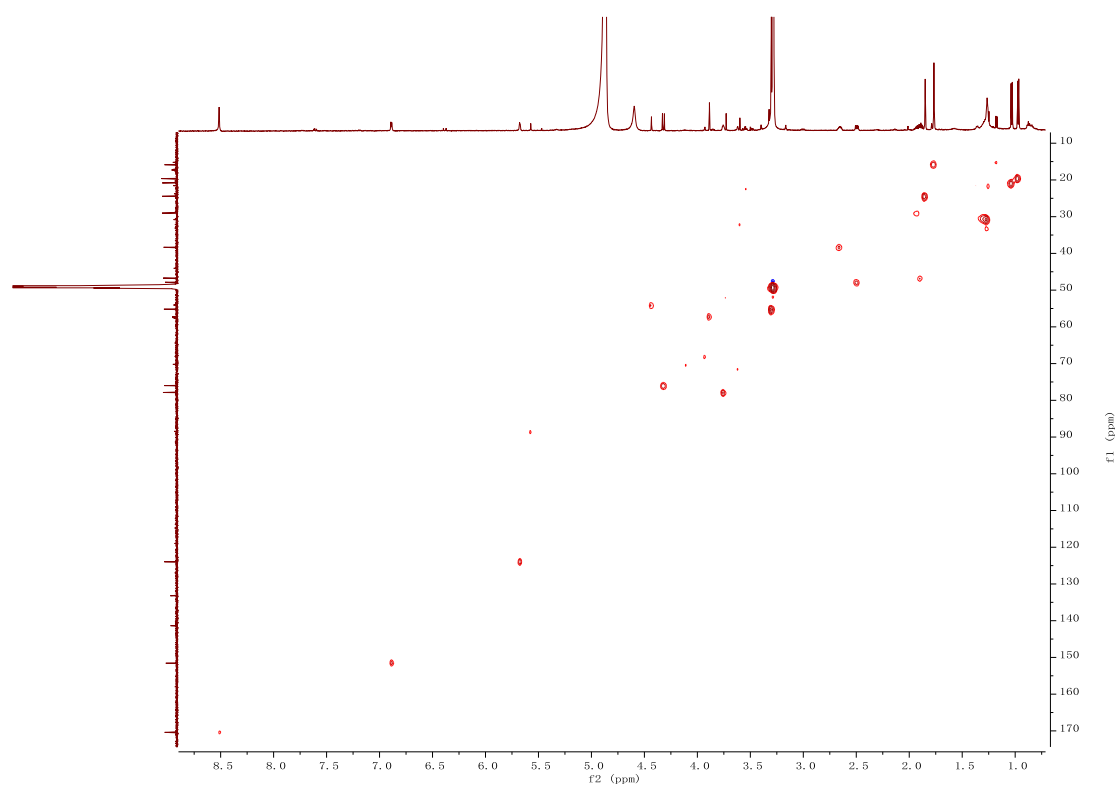

**Figure S32.** HSQC spectrum of compound **3**

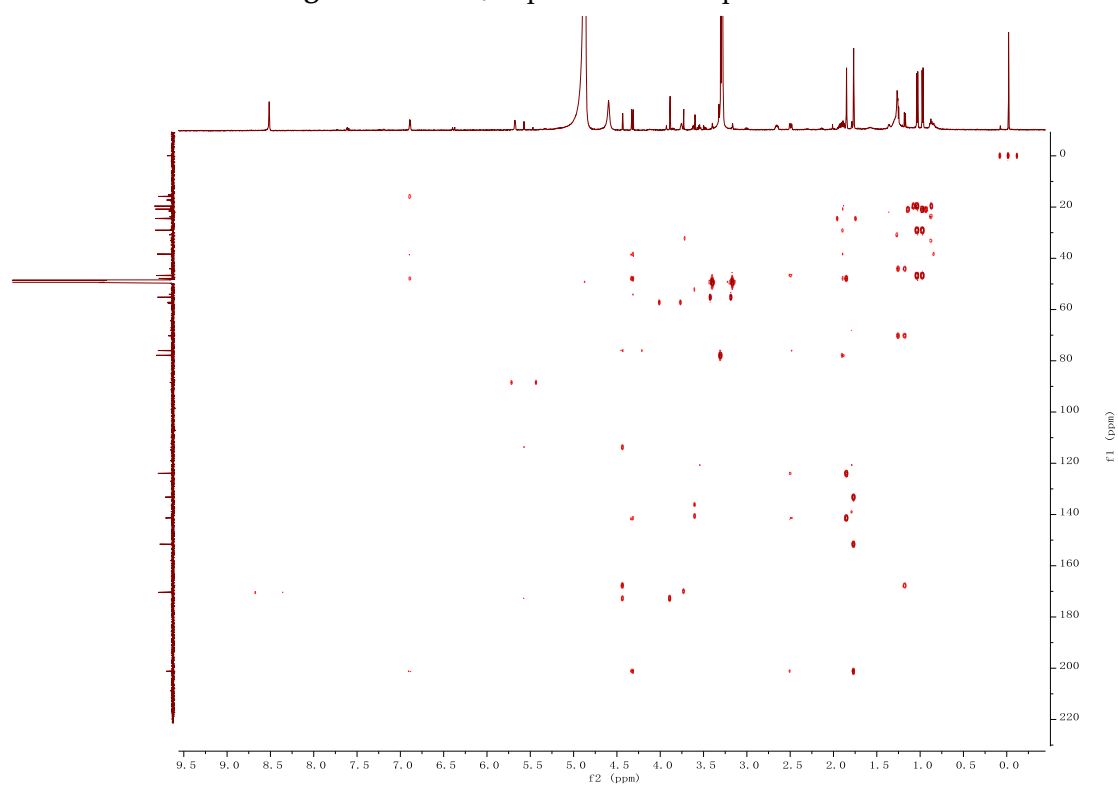

**Figure S33.** HMBC spectrum of compound **3**

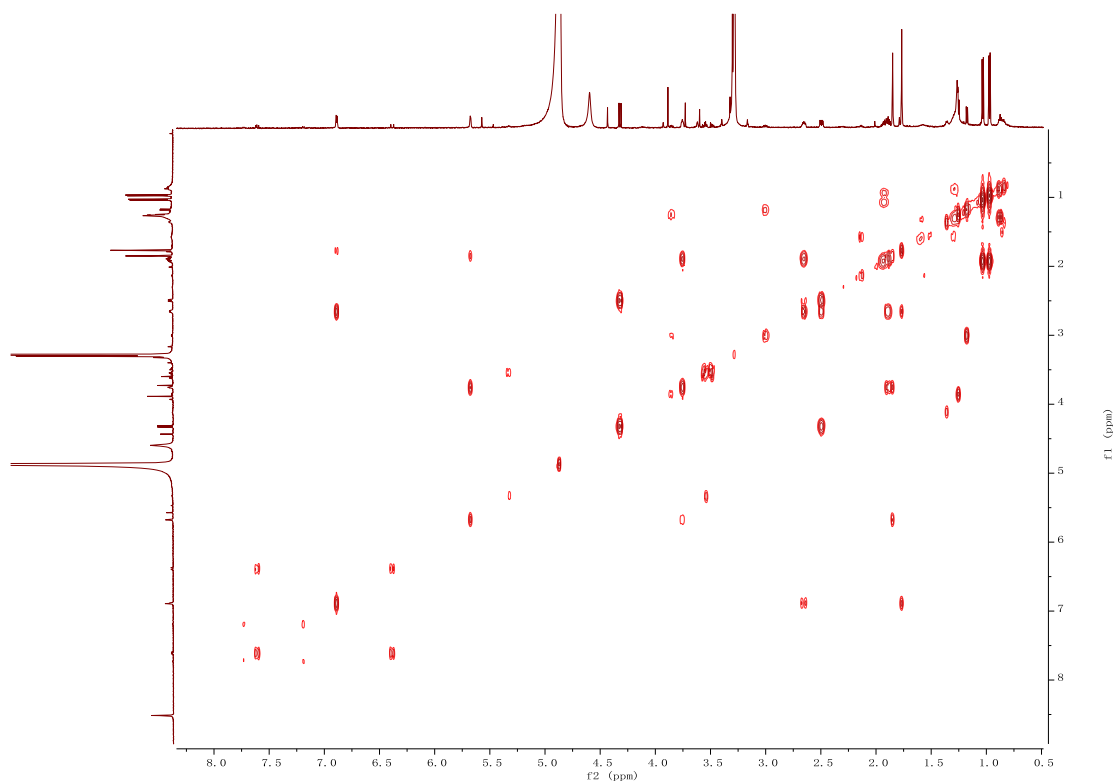

**Figure S34.**  $^1\text{H}$ - $^1\text{H}$  COSY spectrum of compound **3**

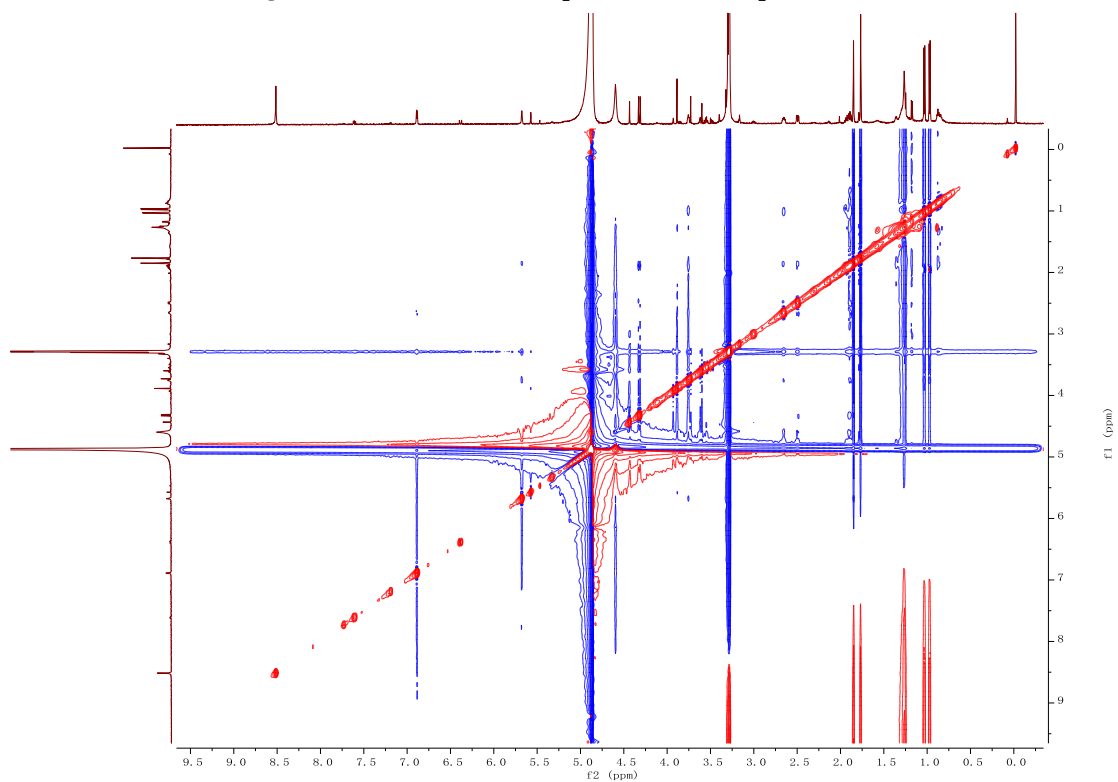

**Figure S35.** ROESY spectrum of compound **3**

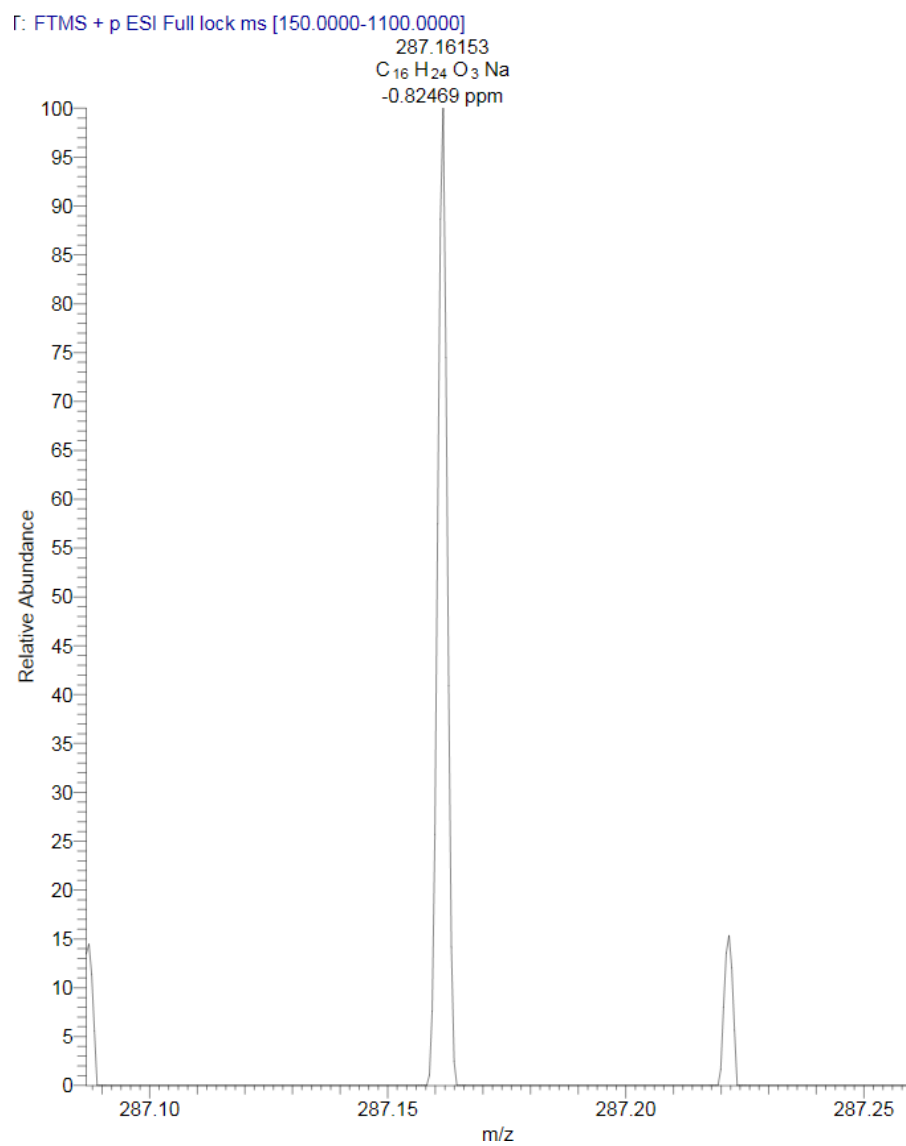

**Figure S36.** HRESIMS data of compound **3**



### S3.4 NMR and HRESIMS spectra of albocinnamin D (4)

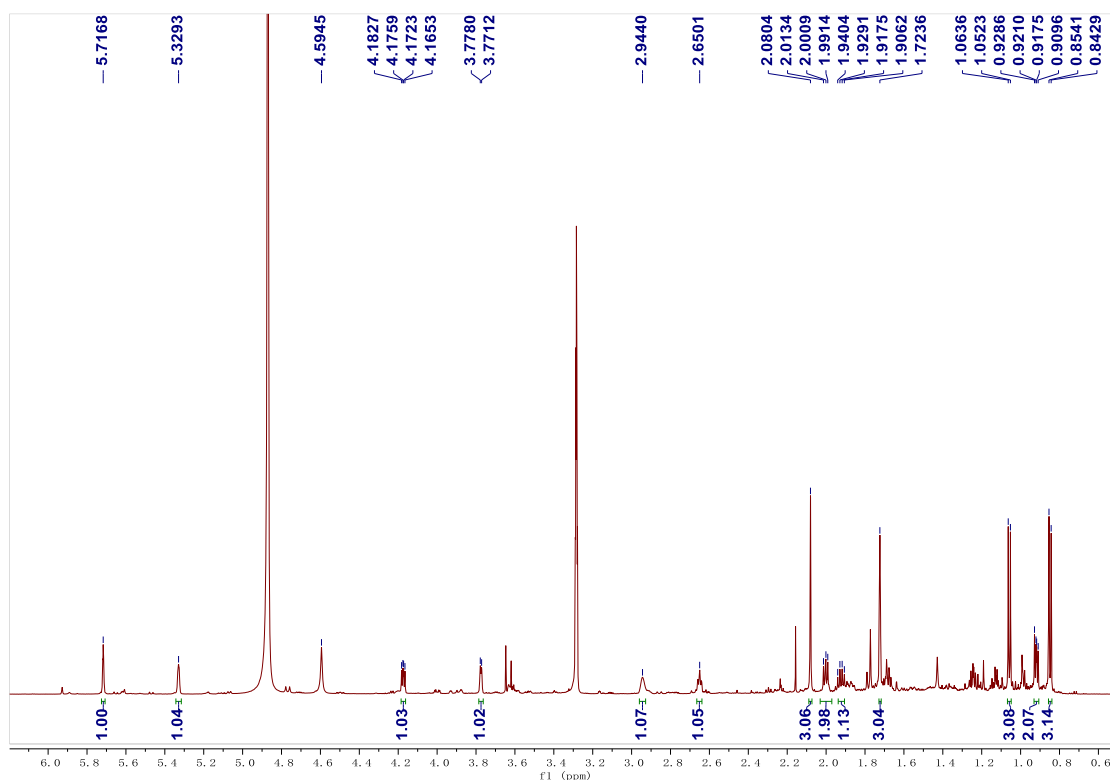

Figure S37. <sup>1</sup>H NMR spectrum of compound 4. (600 MHz, methanol-*d*<sub>4</sub>)

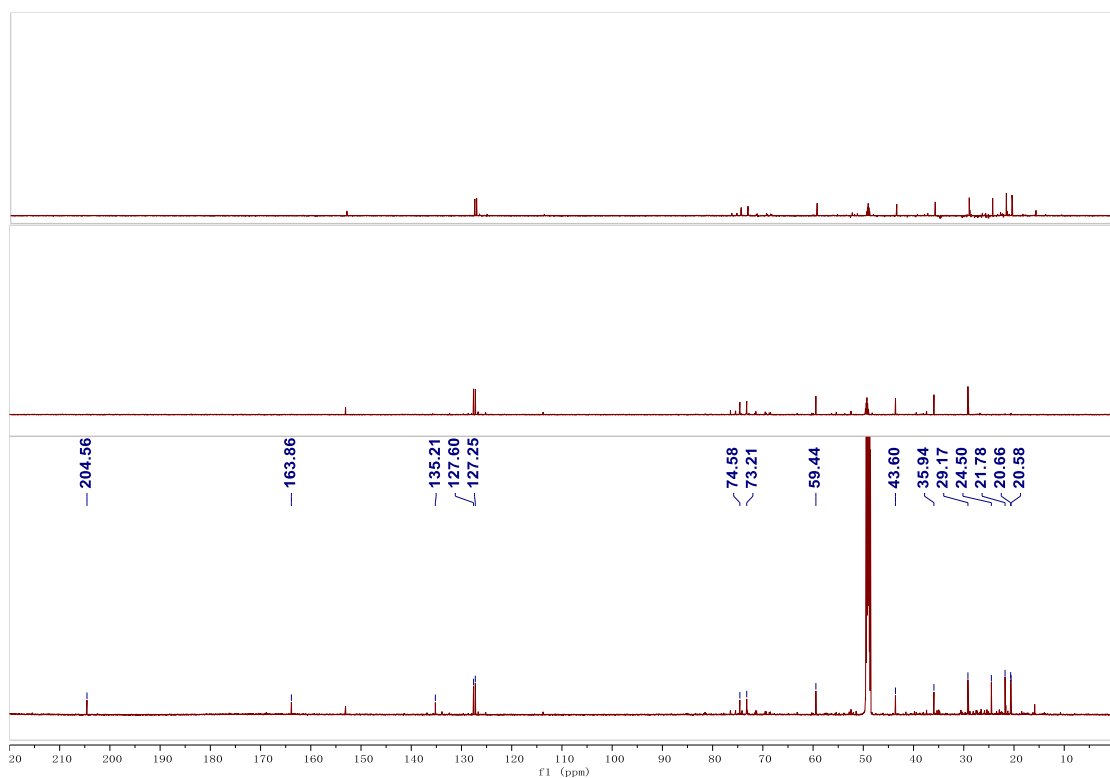

Figure S38. <sup>13</sup>C NMR spectrum of compound 4. (150 MHz, methanol-*d*<sub>4</sub>)

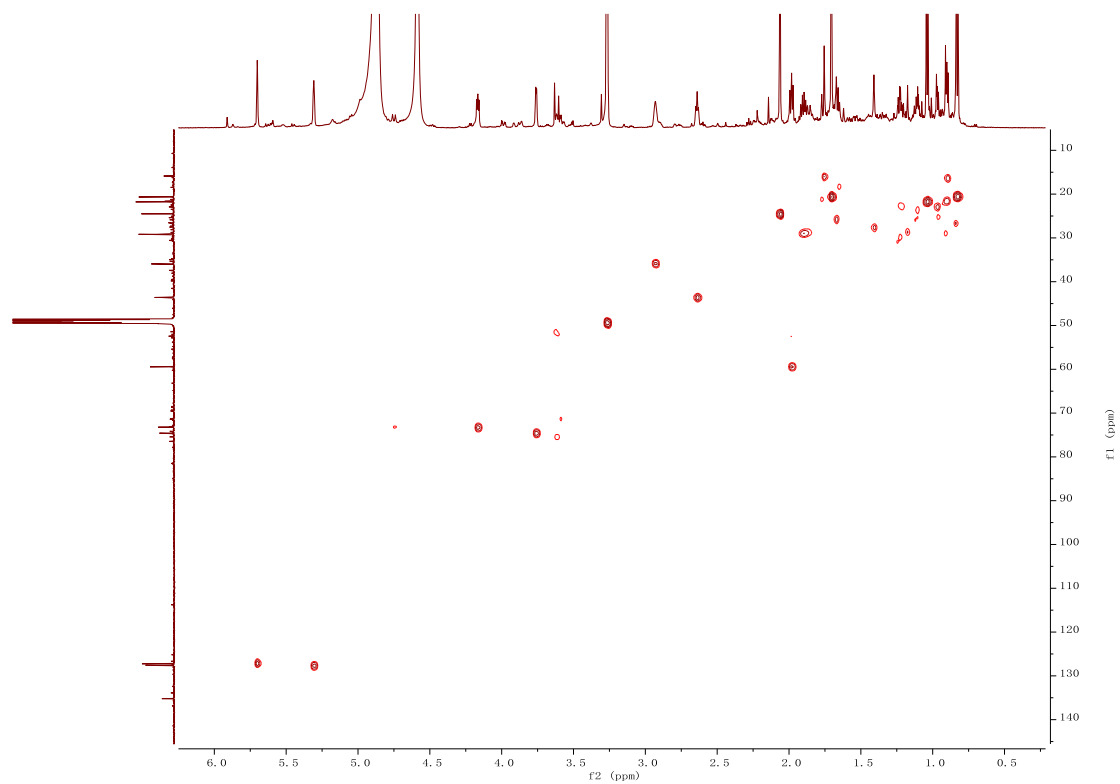

**Figure S39. HSQC spectrum of compound 4**

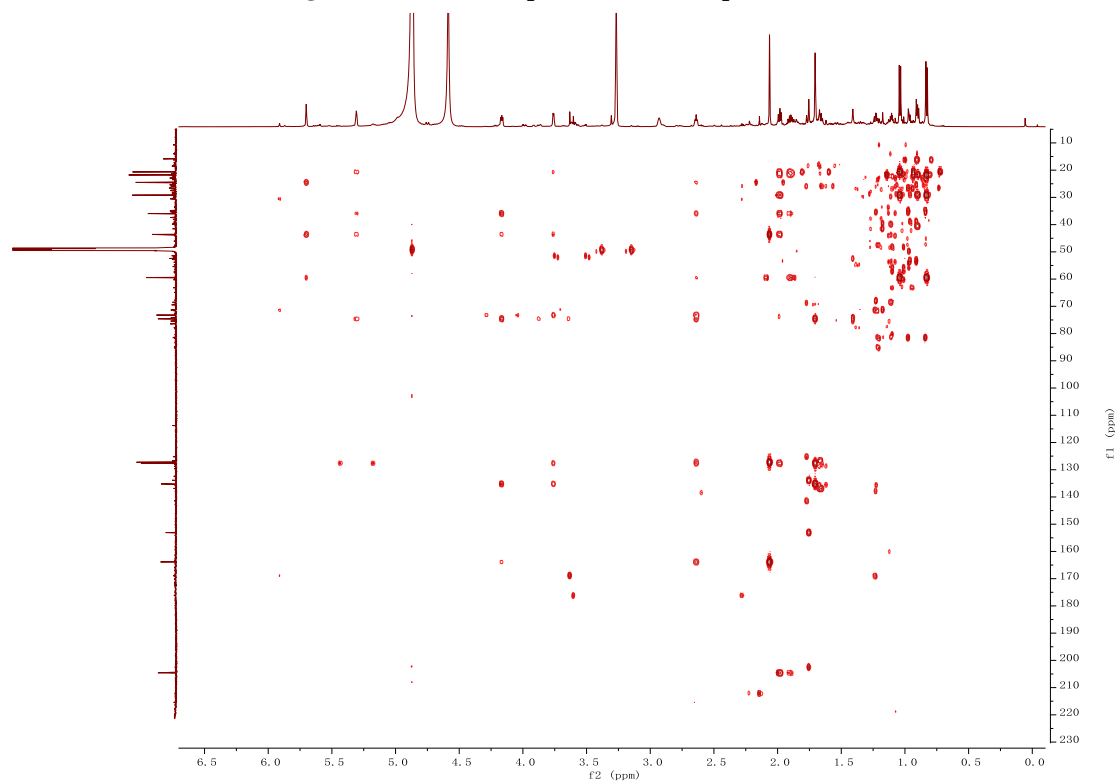

**Figure S40. HMBC spectrum of compound 4**

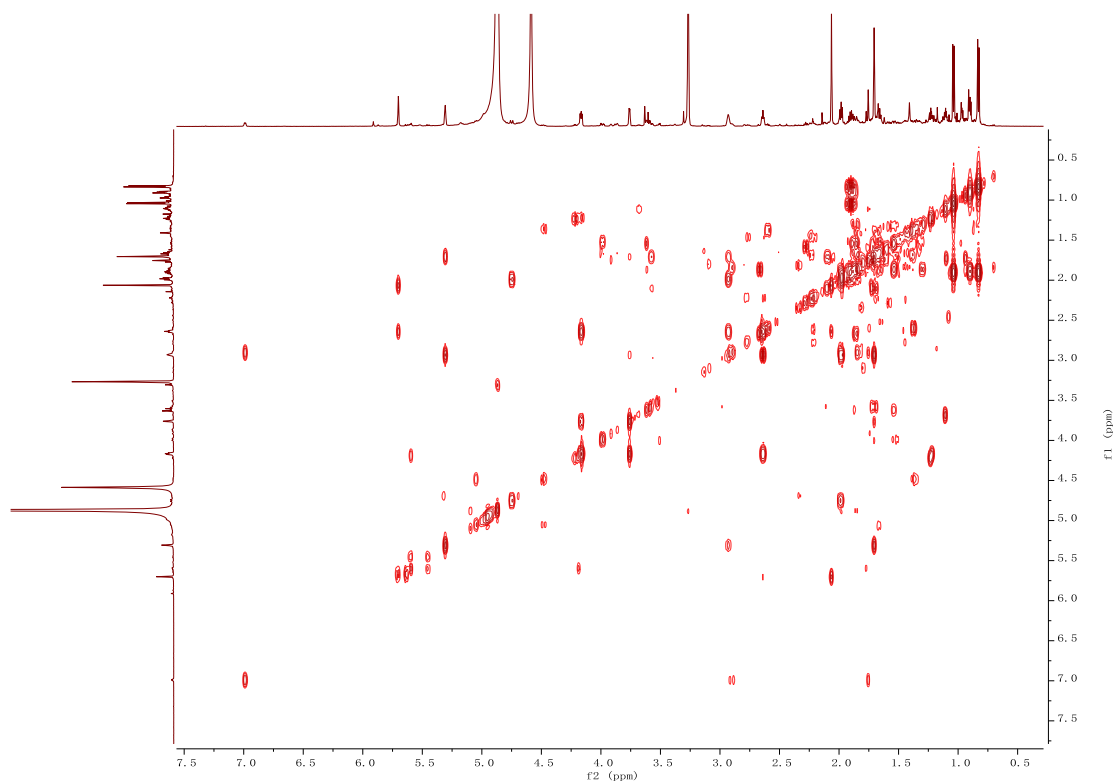

**Figure S41.**  $^1\text{H}$ - $^1\text{H}$  COSY spectrum of compound 4

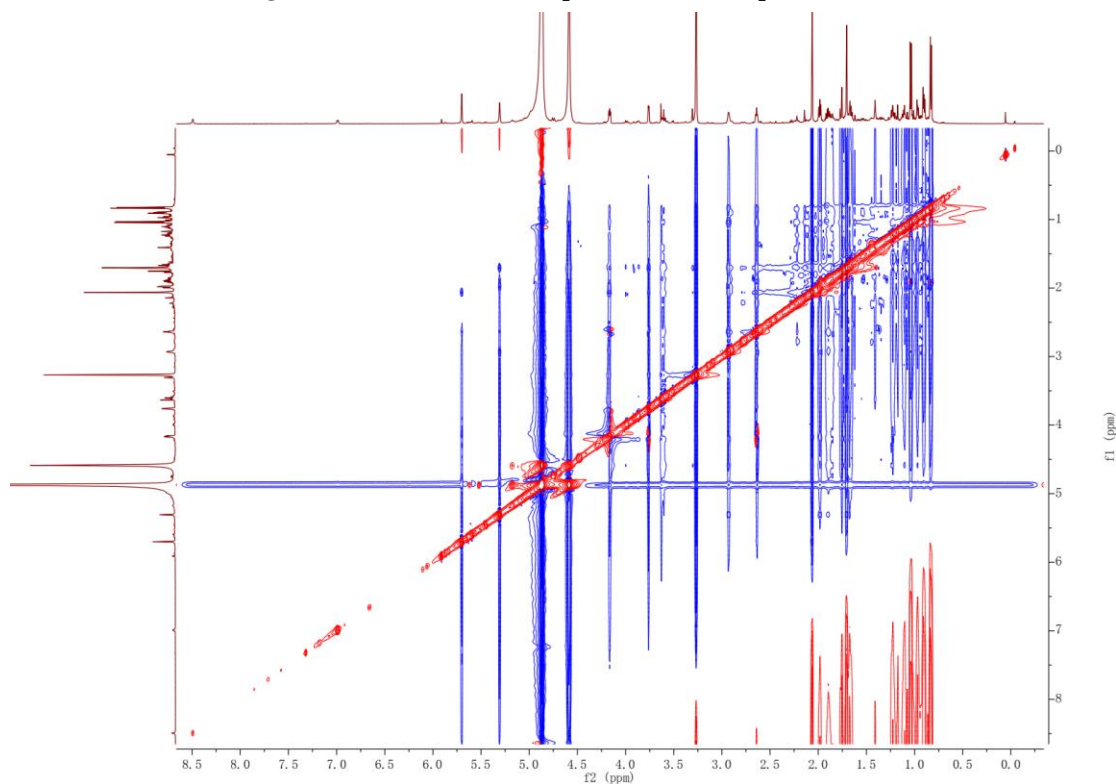

**Figure S42.** ROESY spectrum of compound 4

T: FTMS + p ESI Full lock ms [150.0000-1100.0000]

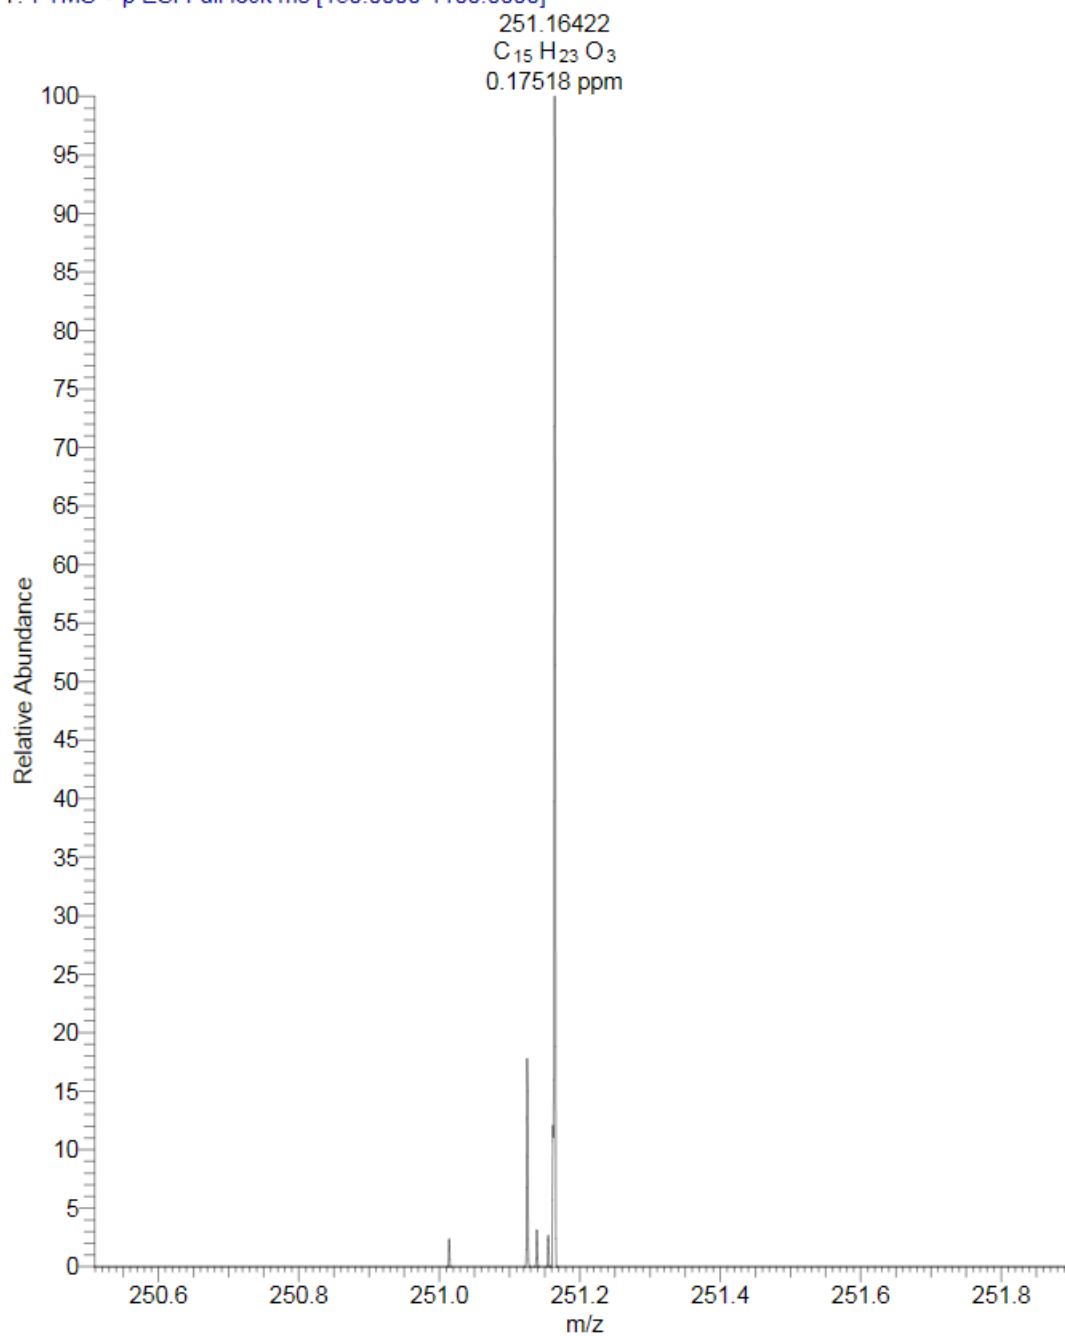

**Figure S43.** HRESIMS data of compound **4**

### S3.5 NMR and HRESIMS spectra of albocinnamin E (5)

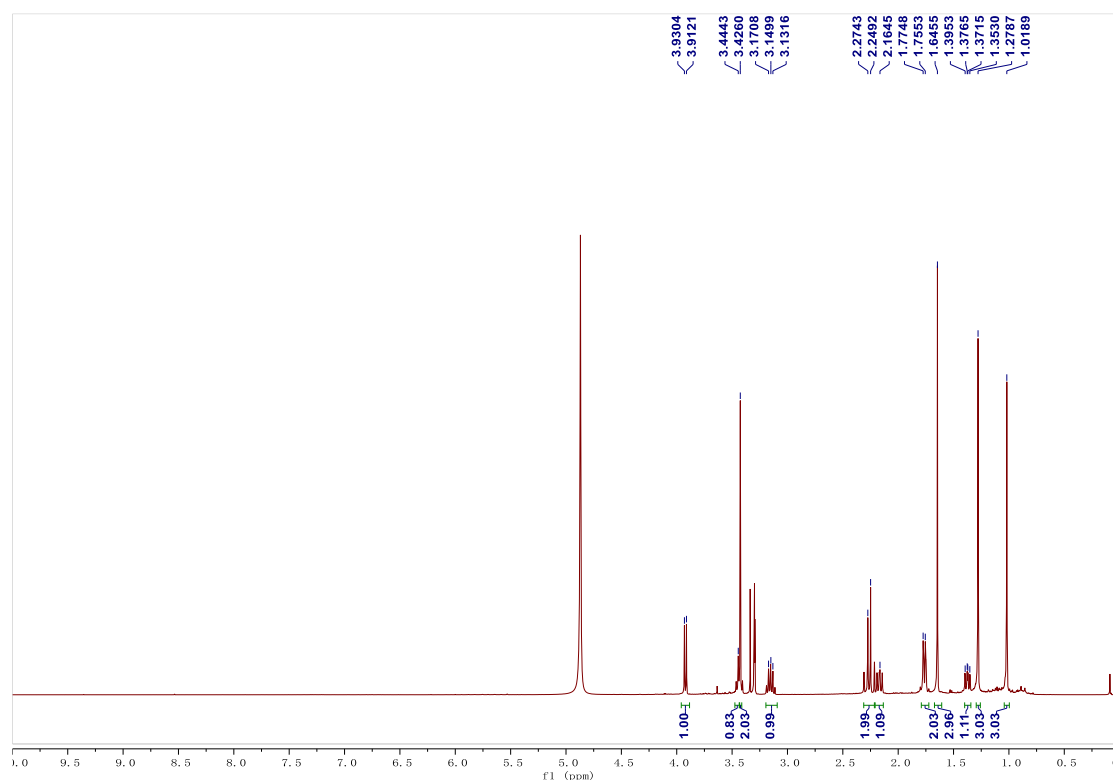

**Figure S44.** <sup>1</sup>H NMR spectrum of compound 5. (600 MHz, methanol-*d*<sub>4</sub>)

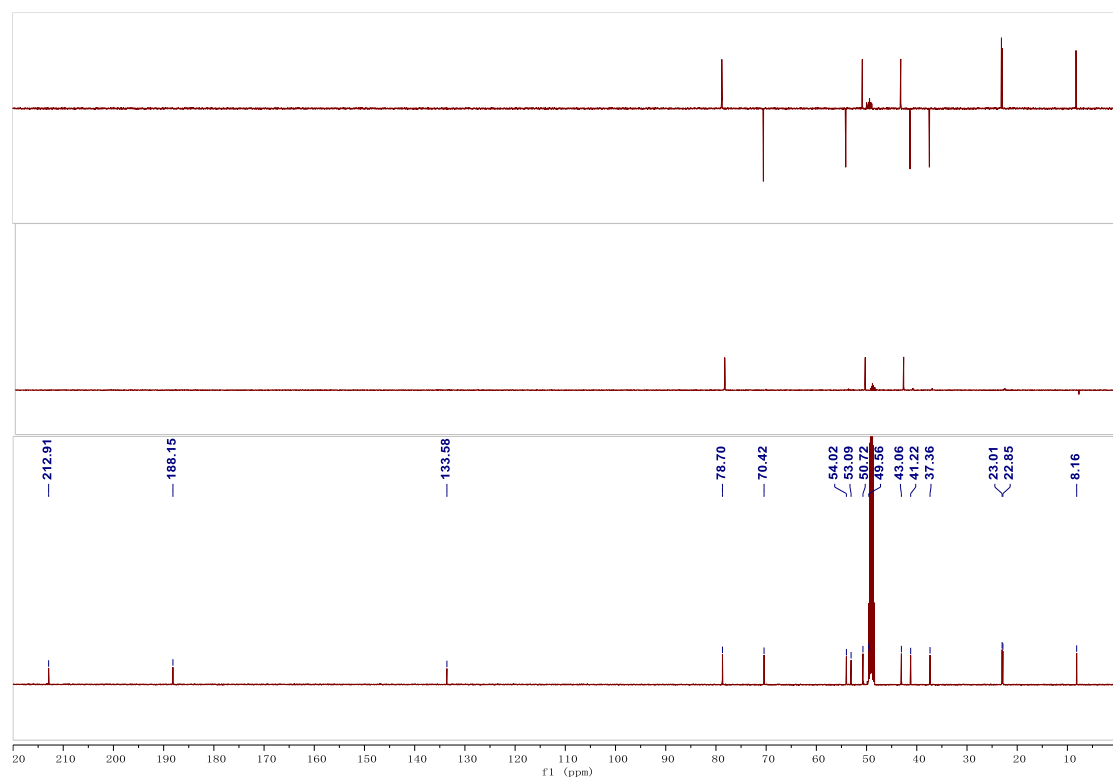

**Figure S45.** <sup>13</sup>C NMR spectrum of compound 5. (150 MHz, methanol-*d*<sub>4</sub>)

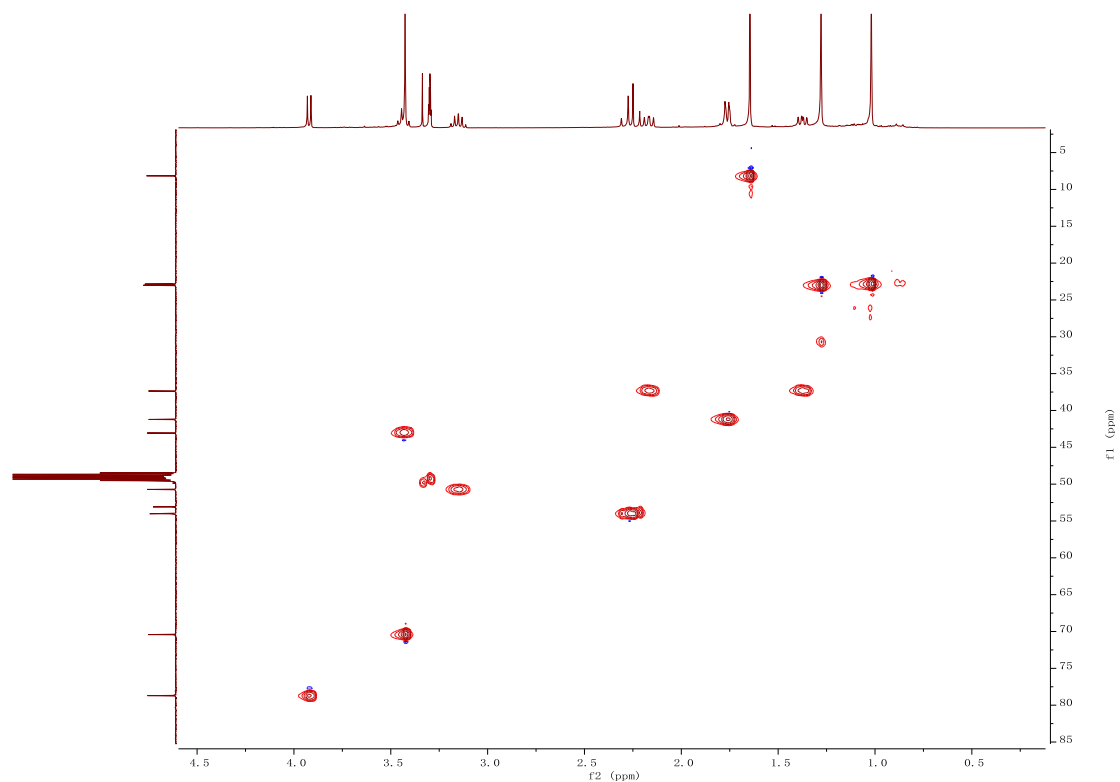

**Figure S46.** HSQC spectrum of compound **5**

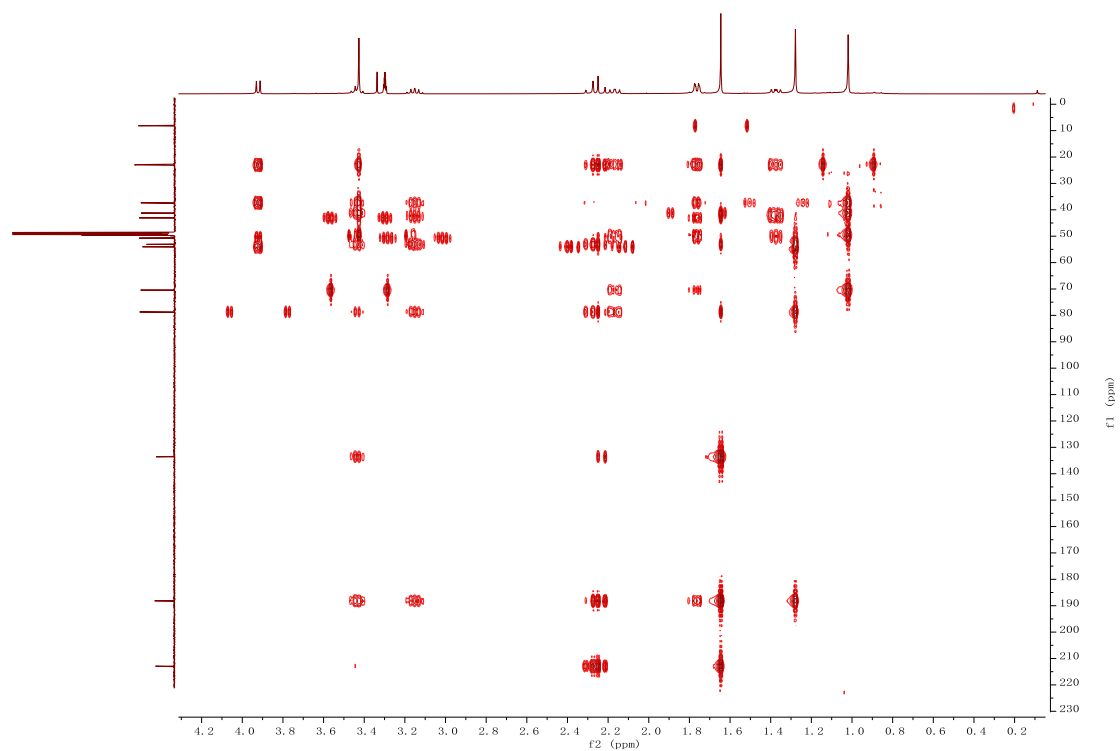

**Figure S47.** HMBC spectrum of compound **5**

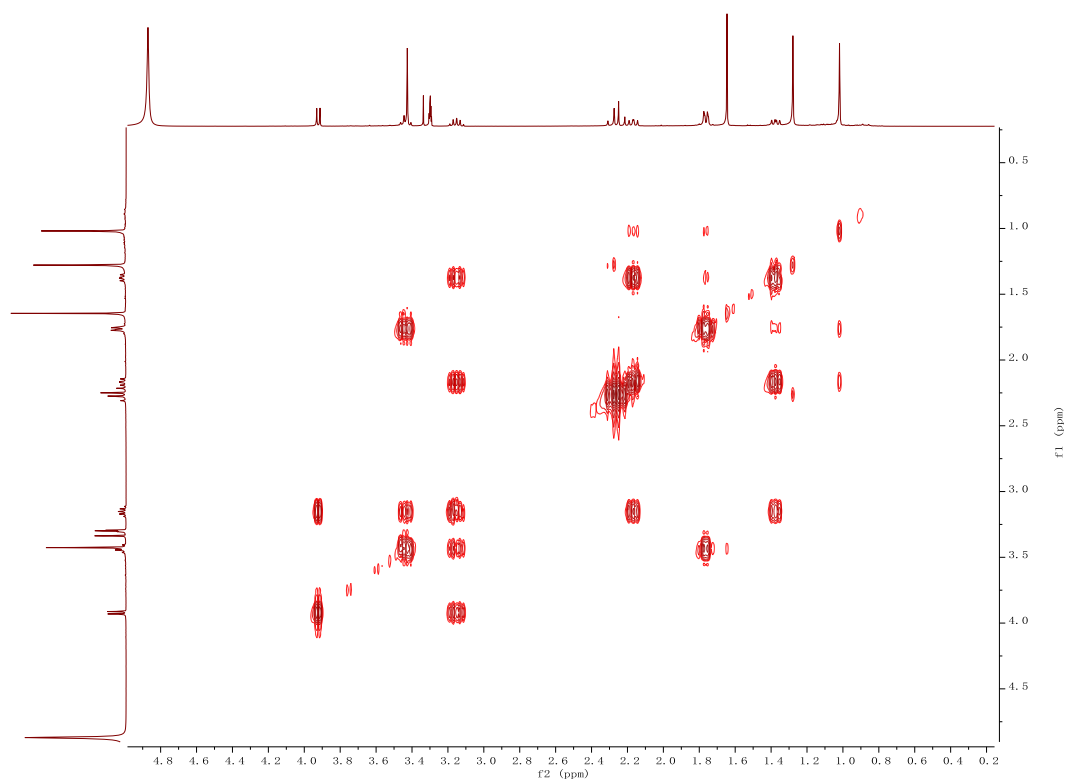

**Figure S48.**  $^1\text{H}$ - $^1\text{H}$  COSY spectrum of compound **5**

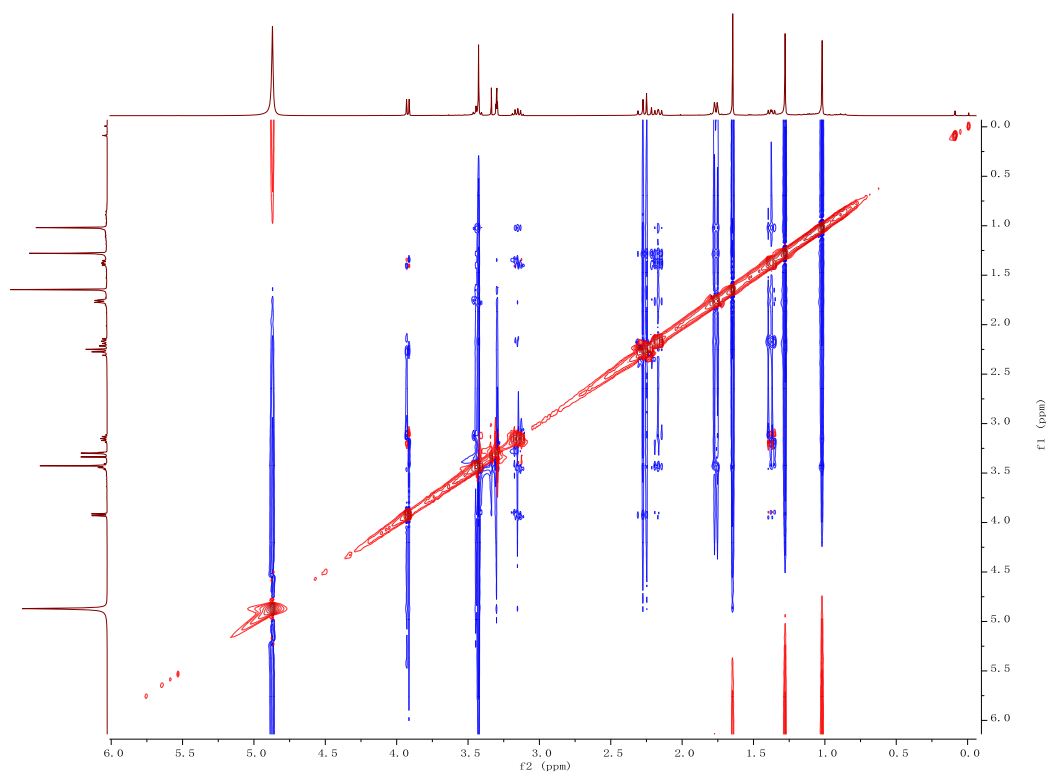

**Figure S49.** ROESY spectrum of compound **5**

T: FTMS + p ESI Full lock ms [150.0000-1100.0000]

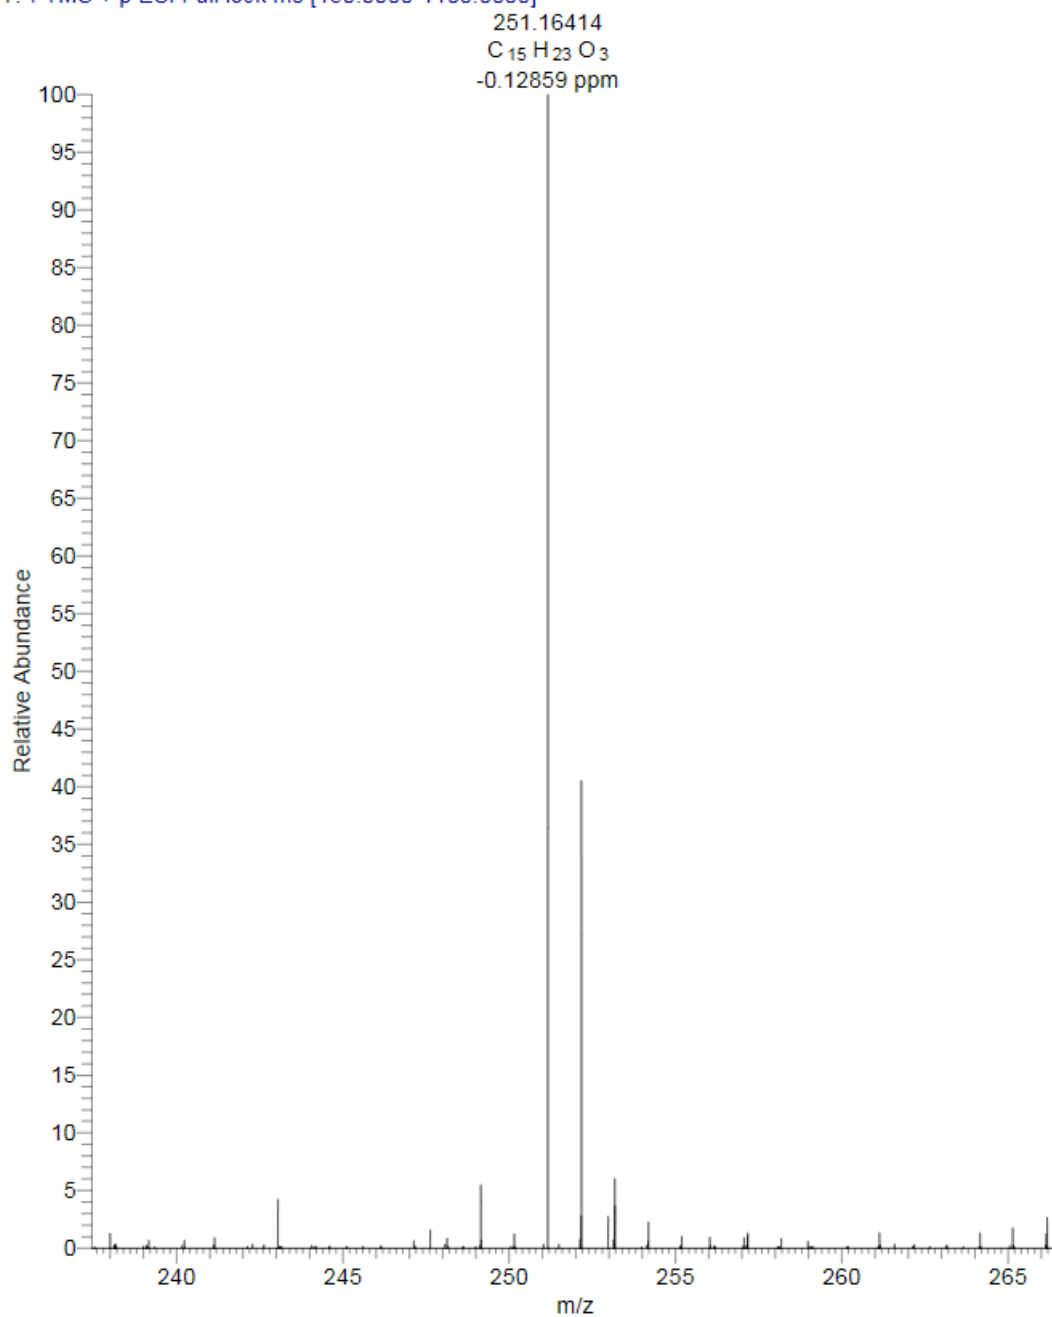

**Figure S50.** HRESIMS data of compound **5**



### S3.6 NMR and HRESIMS spectra of albocinnamin F (6)

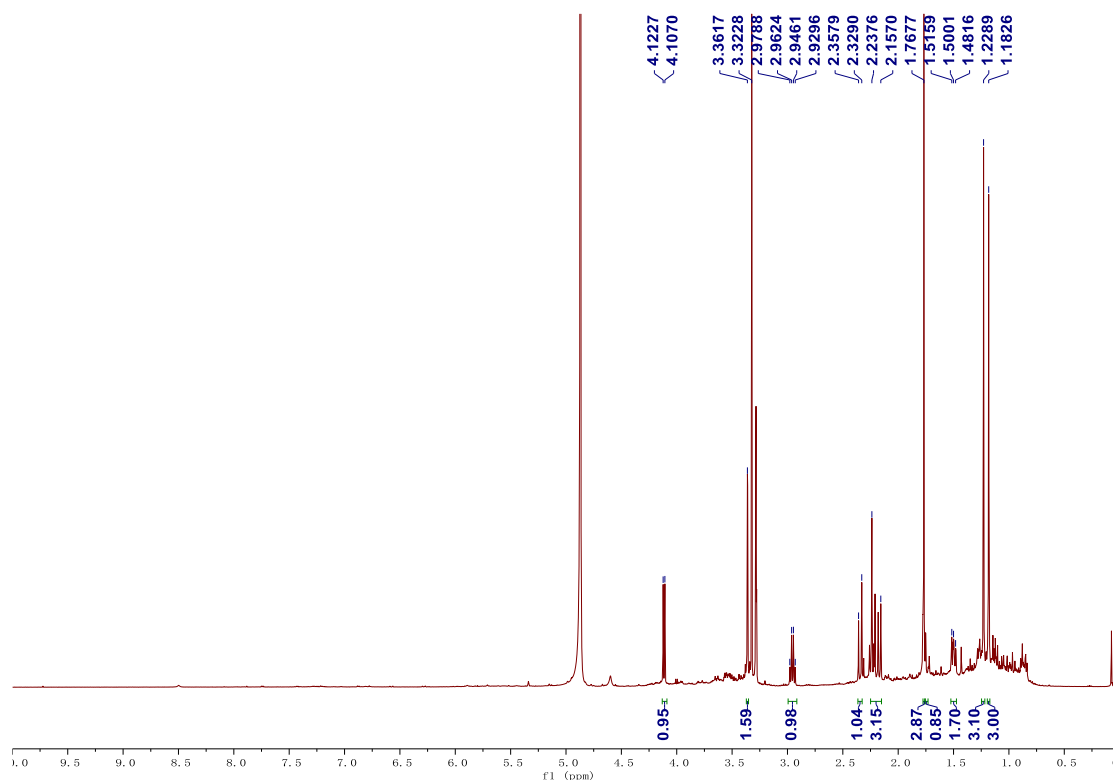

Figure S51. <sup>1</sup>H NMR spectrum of compound 6. (600 MHz, DMSO-*d*<sub>6</sub>)

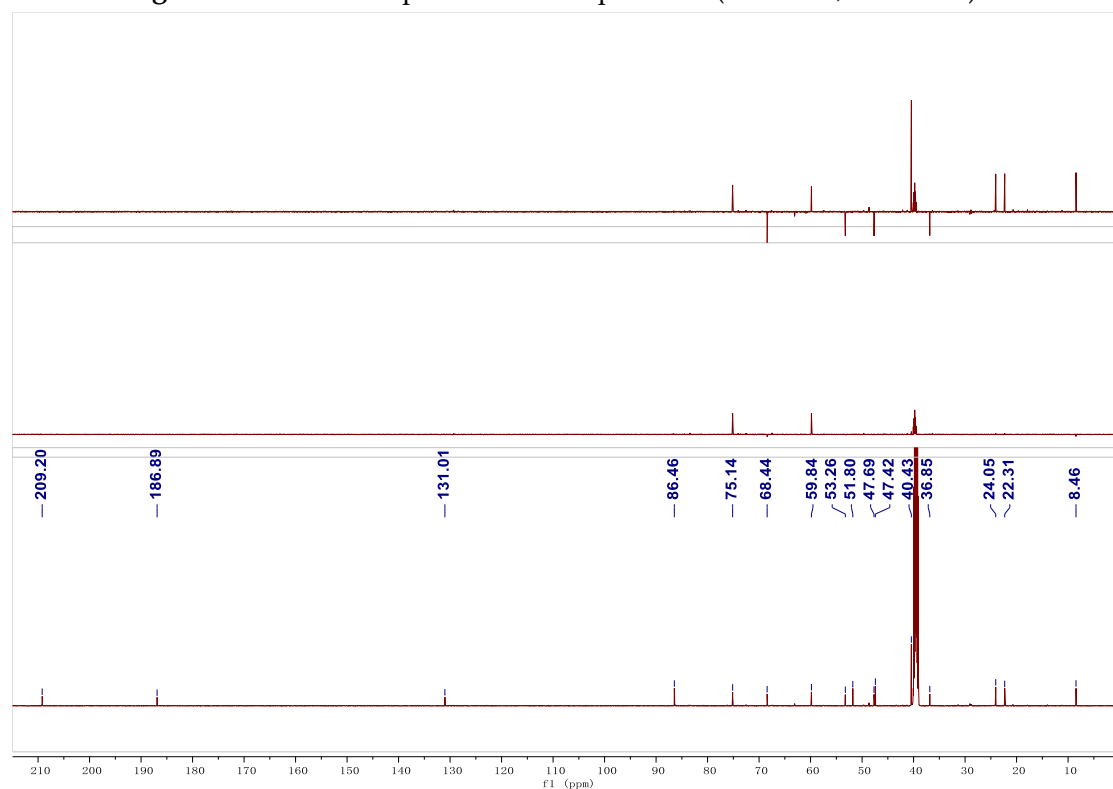

Figure S52. <sup>13</sup>C NMR spectrum of compound 6. (150 MHz, DMSO-*d*<sub>6</sub>)

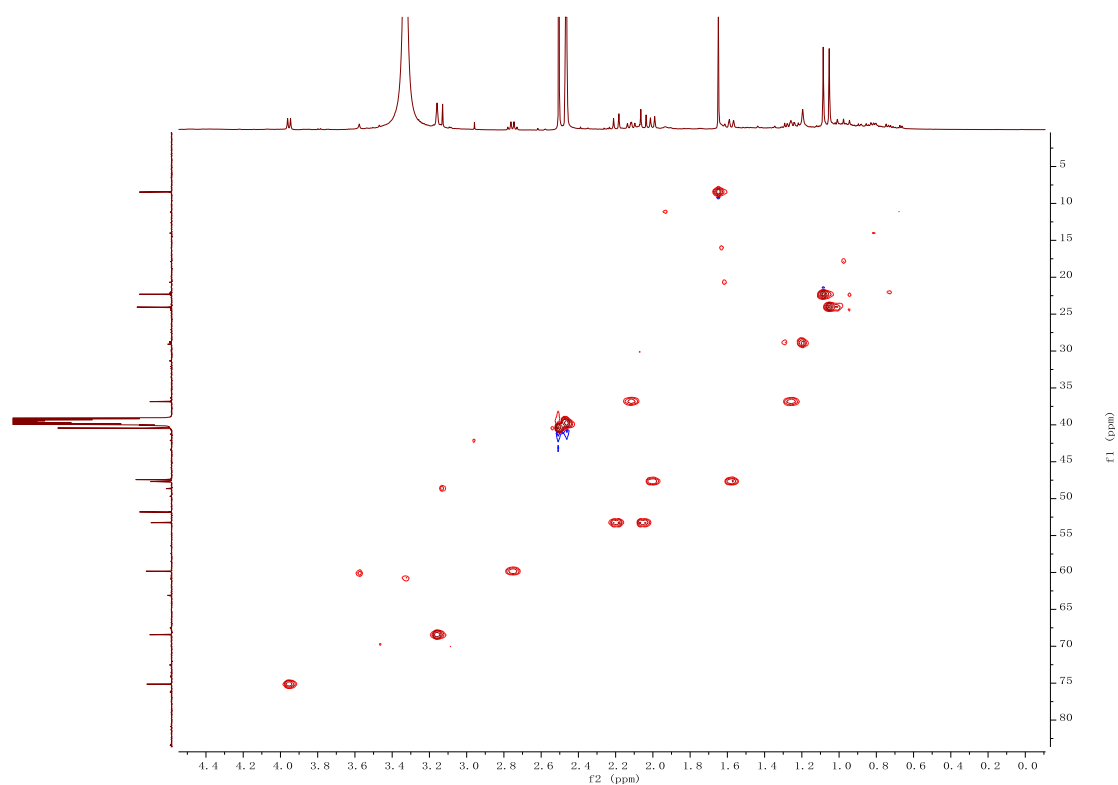

**Figure S53. HSQC spectrum of compound 6**

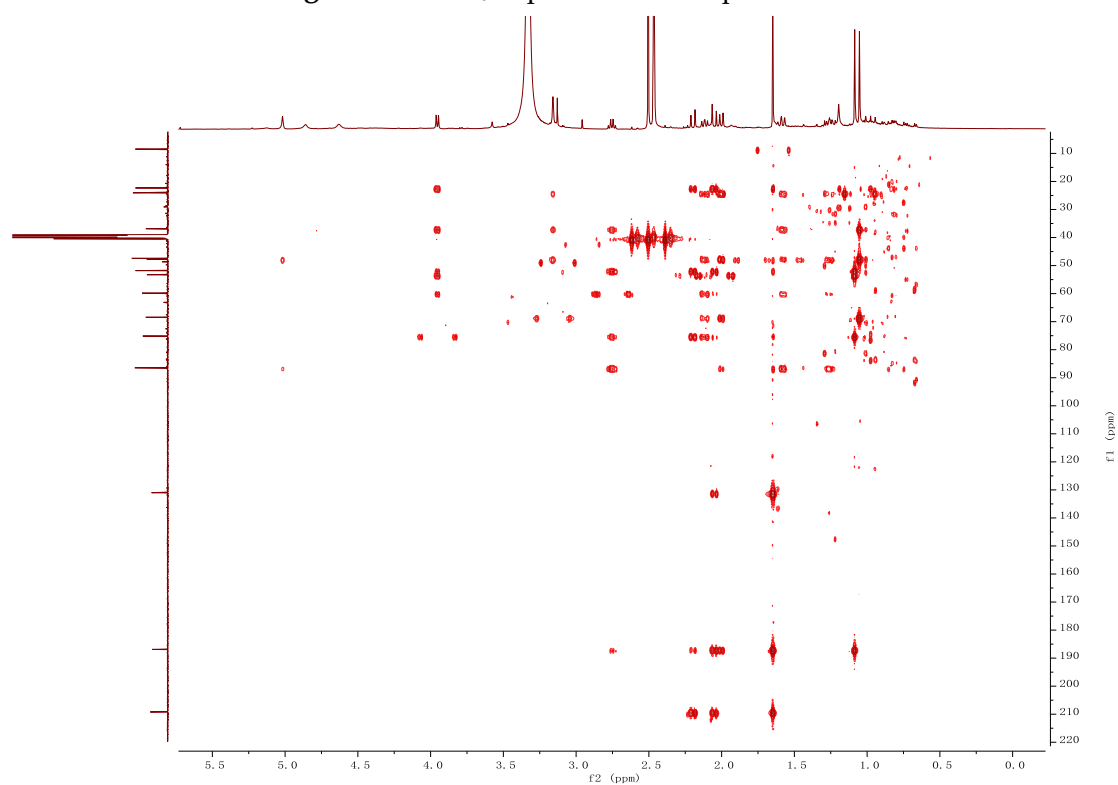

**Figure S54. HMBC spectrum of compound 6**

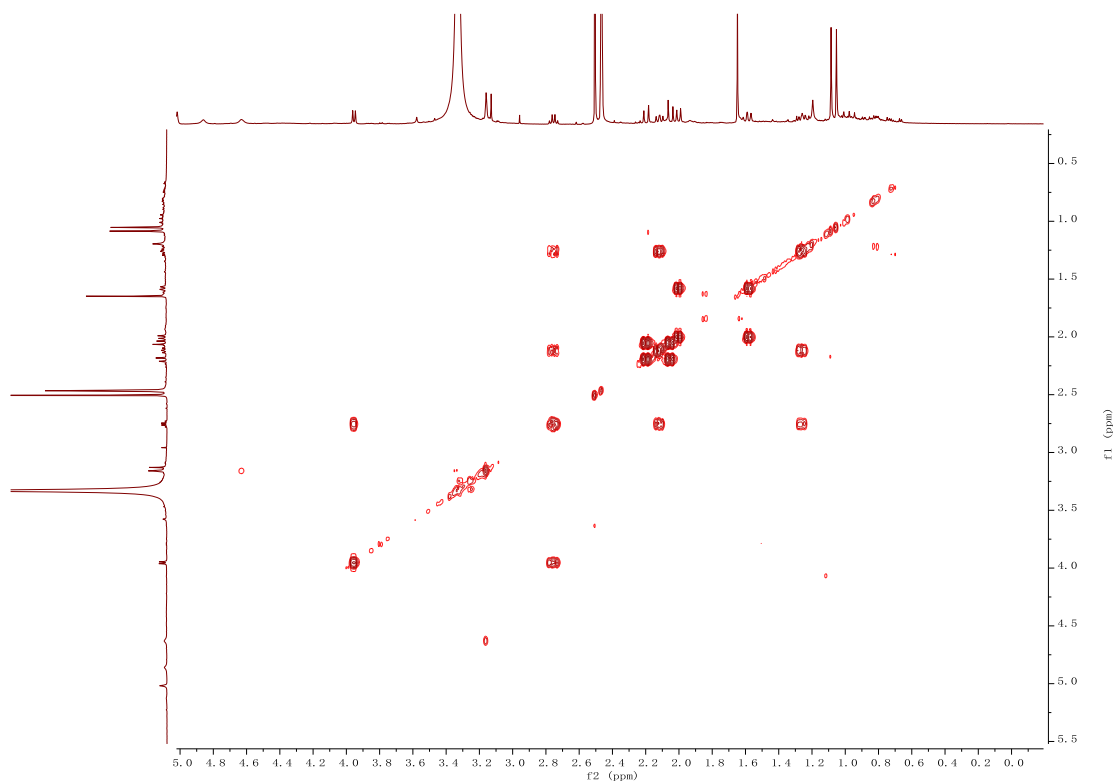

**Figure S55.**  $^1\text{H}$ - $^1\text{H}$  COSY spectrum of compound **6**

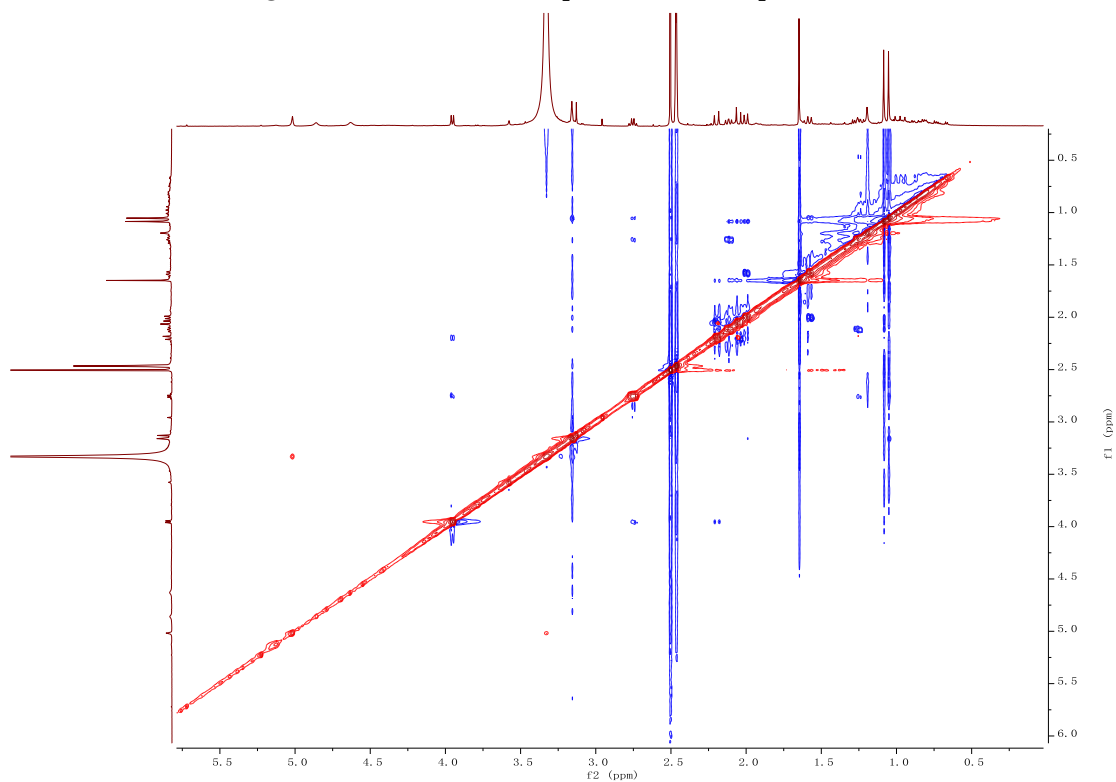

**Figure S56.** ROESY spectrum of compound **6**

T: FTMS + p ESI Full lock ms [150.0000-1100.0000]

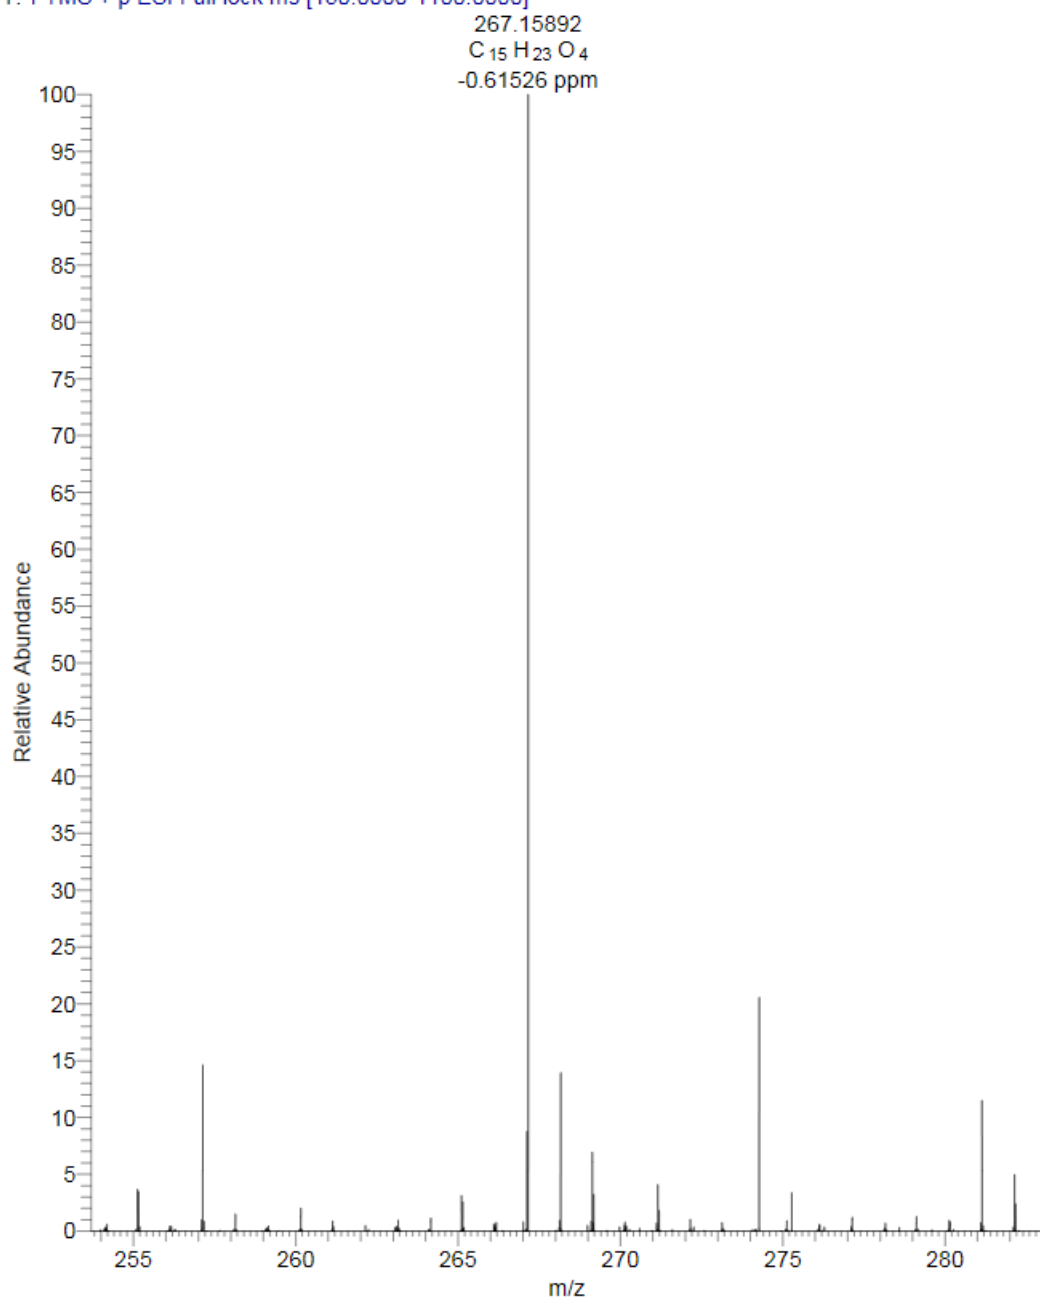

**Figure S57.** HRESIMS data of compound **6**

### S3.7 NMR and HRESIMS spectra of albocinnamin G (7)

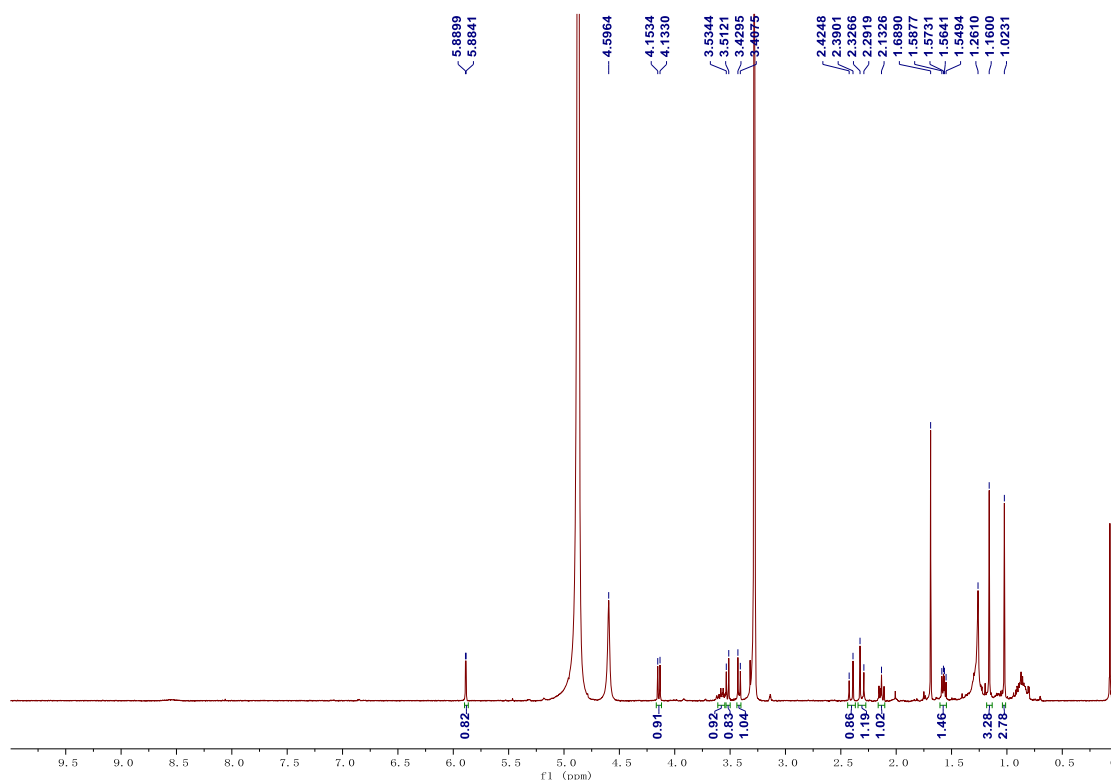

Figure S58. <sup>1</sup>H NMR spectrum of compound 7. (600 MHz, methanol-*d*<sub>4</sub>)

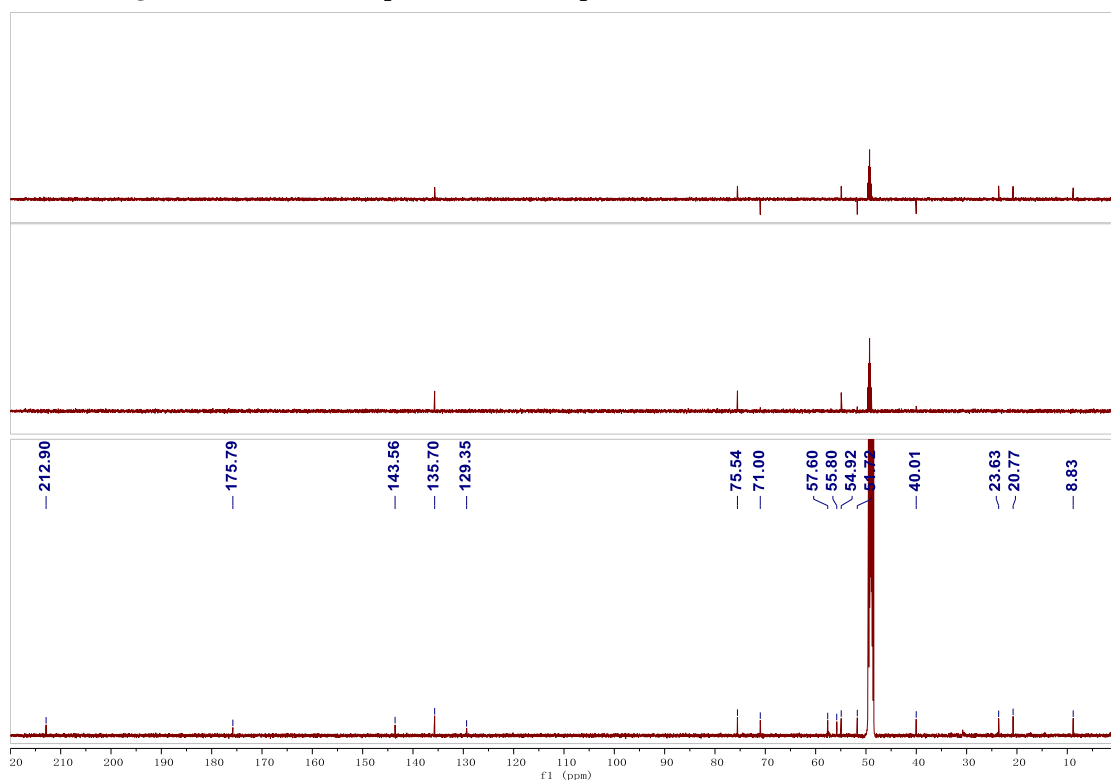

Figure S59. <sup>13</sup>C NMR spectrum of compound 7. (150 MHz, methanol-*d*<sub>4</sub>)

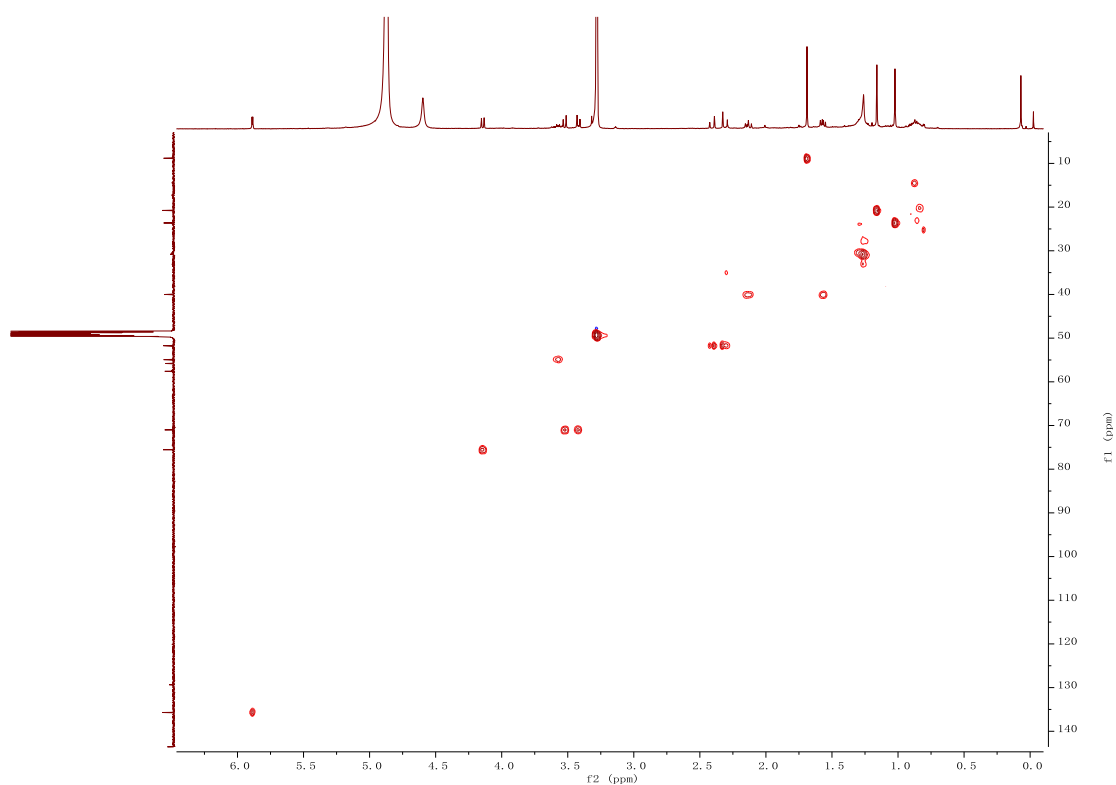

**Figure S60.** HSQC spectrum of compound 7

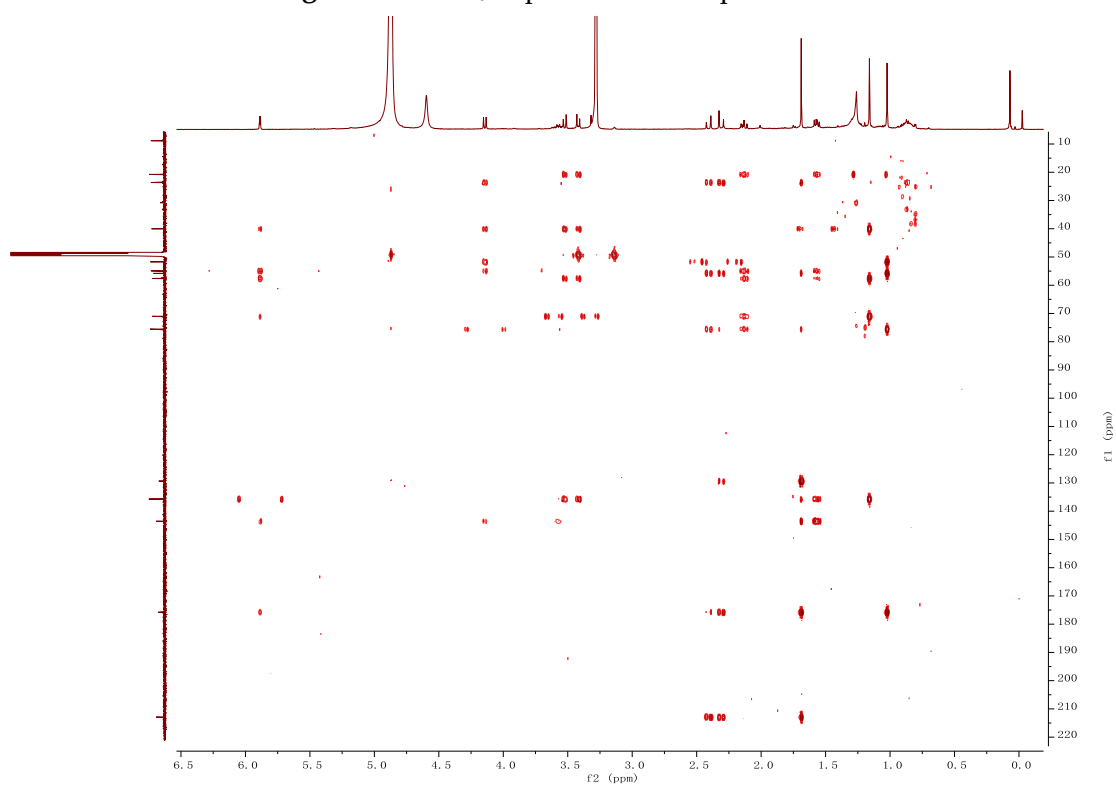

**Figure S61.** HMBC spectrum of compound 7

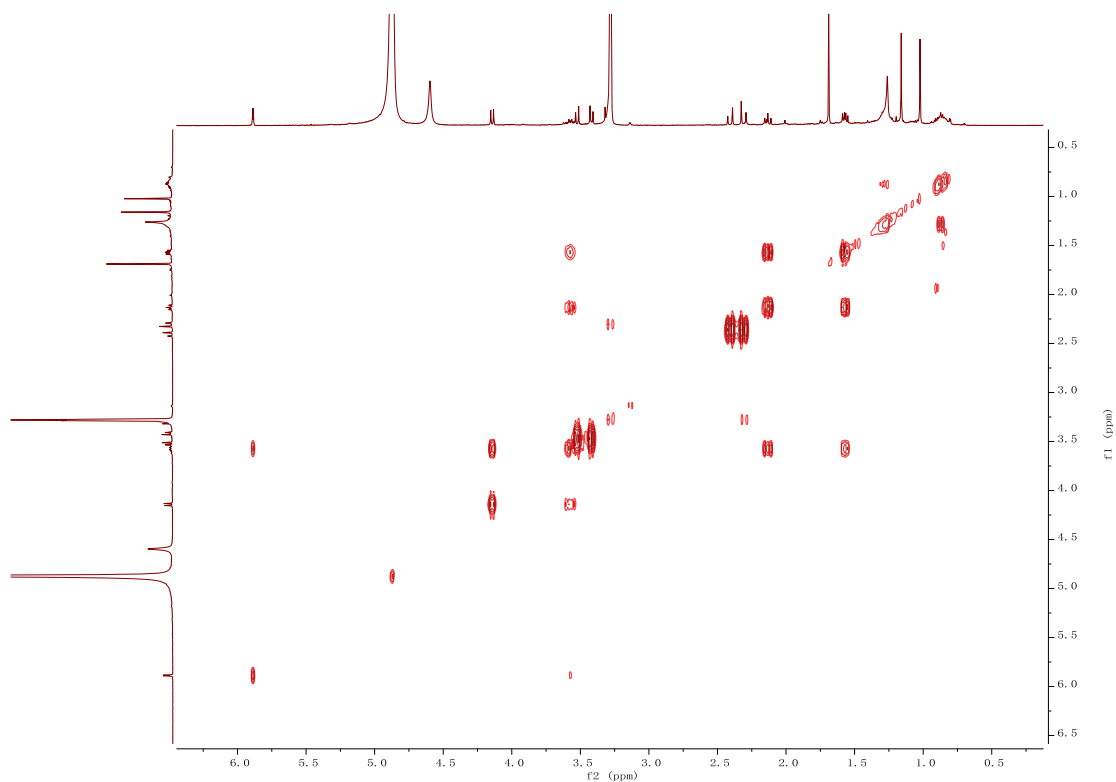

**Figure S62.**  $^1\text{H}$ - $^1\text{H}$  COSY spectrum of compound 7

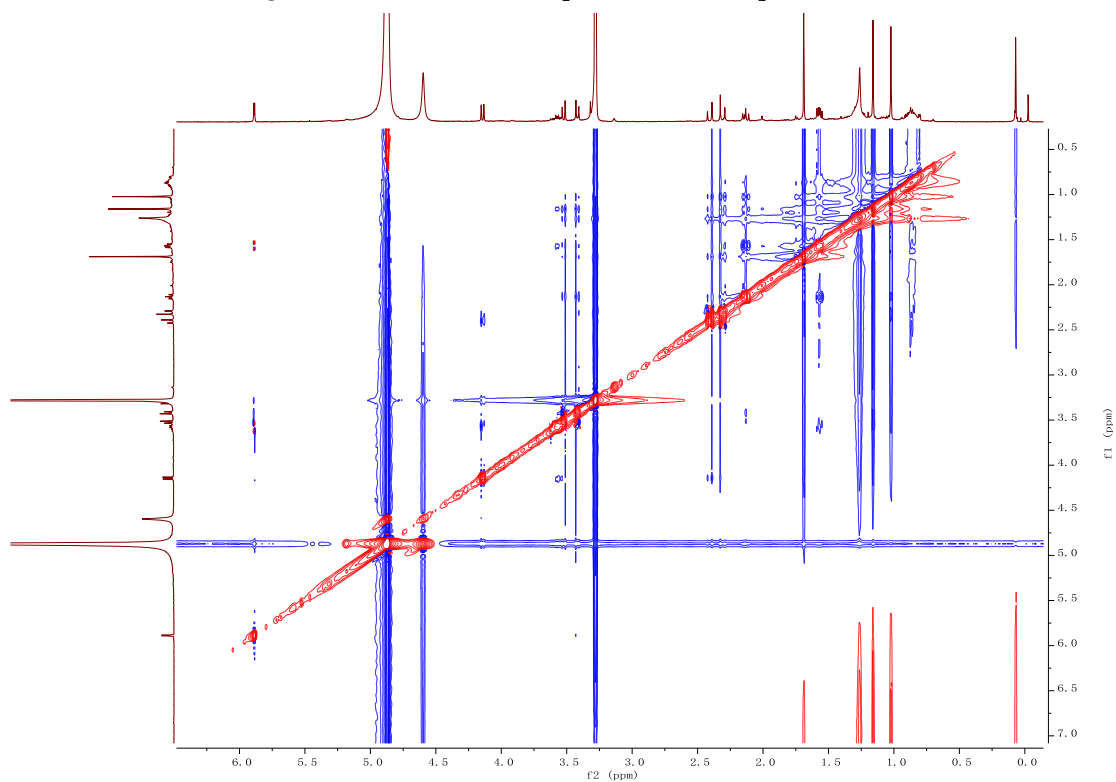

**Figure S63.** ROESY spectrum of compound 7

T: FTMS + p ESI Full lock ms [150.0000-800.0000]

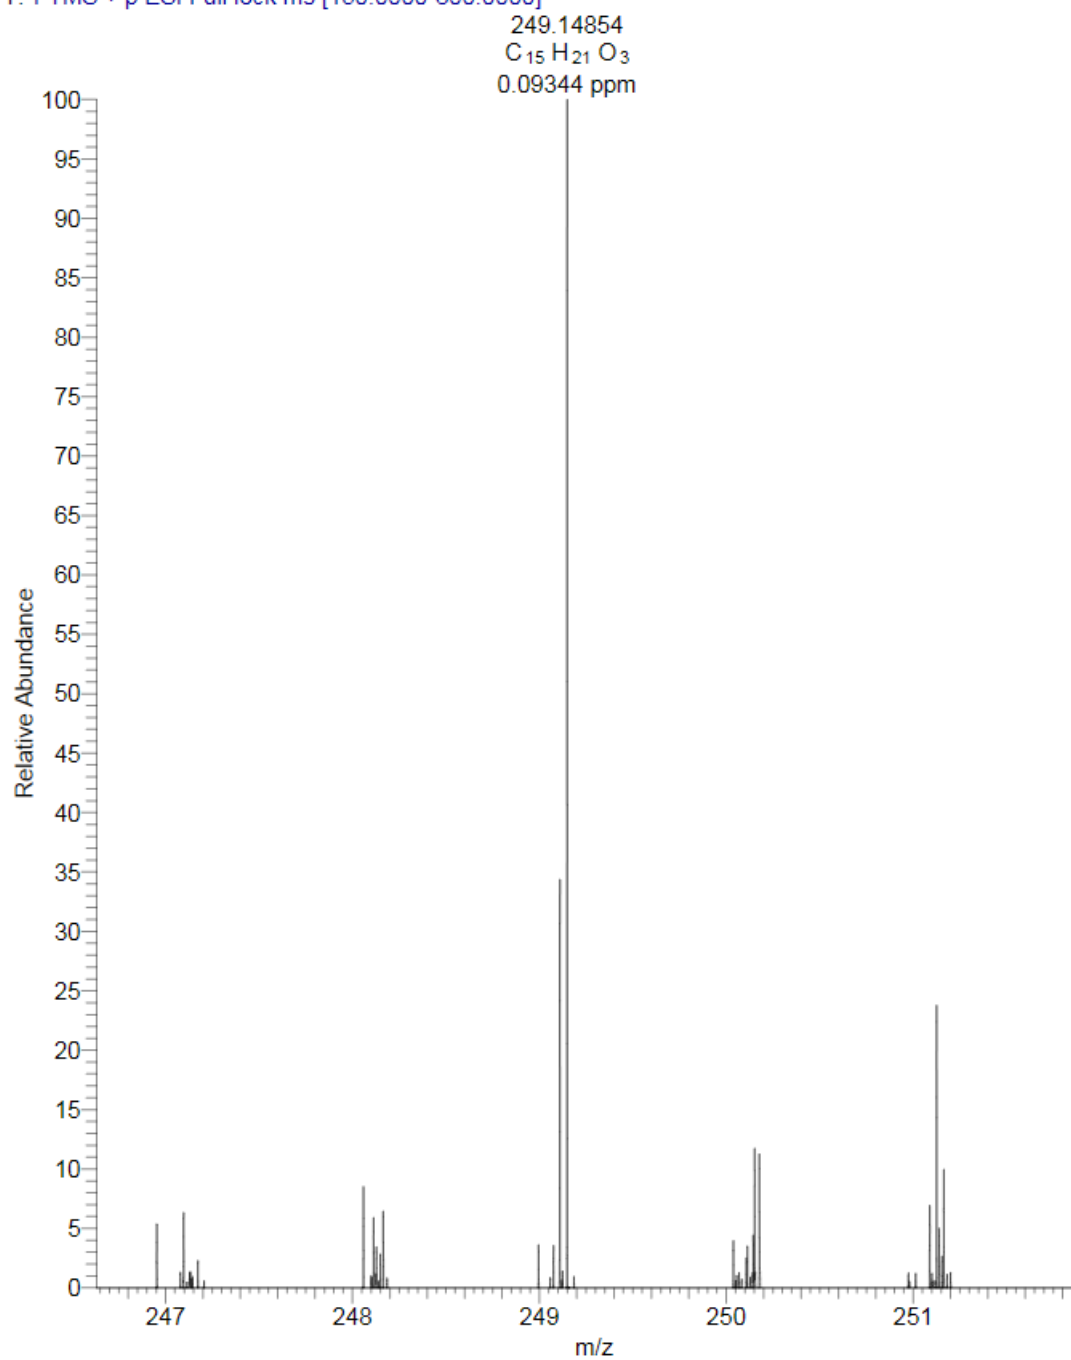

**Figure S64.** HRESIMS data of compound **7**



### S3.8 NMR and HRESIMS spectra of albocinnamin H (8)

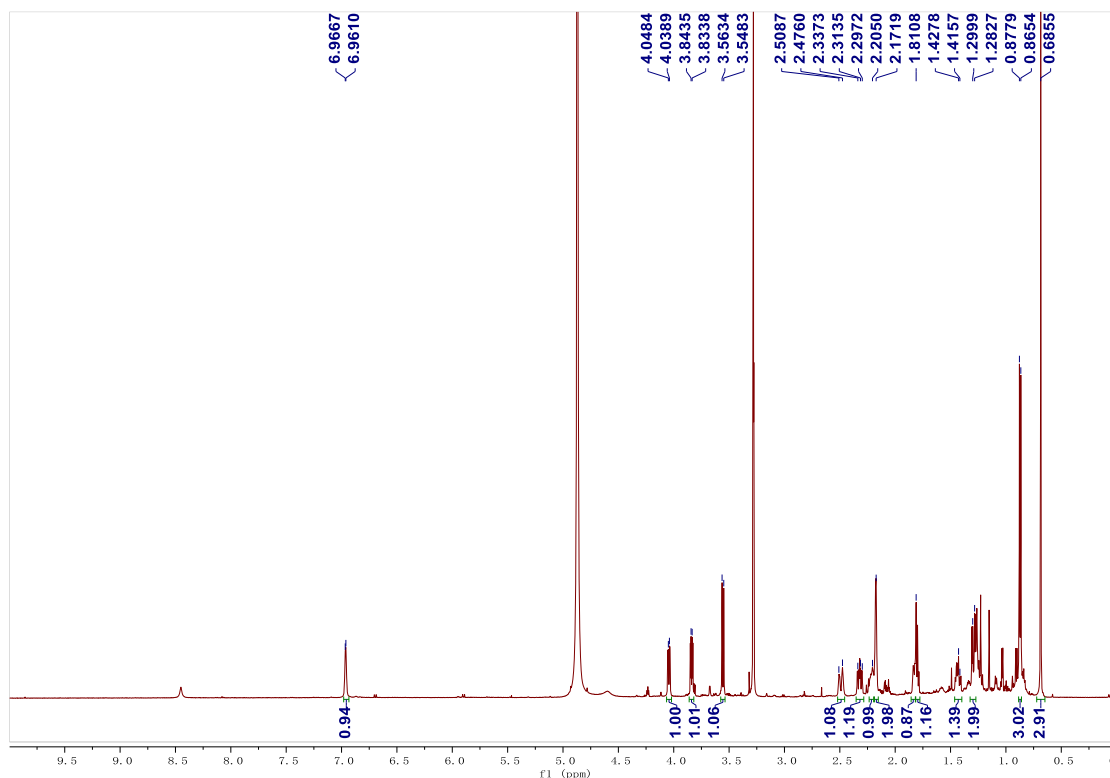

Figure S65. <sup>1</sup>H NMR spectrum of compound 8. (600 MHz, methanol-*d*<sub>4</sub>)

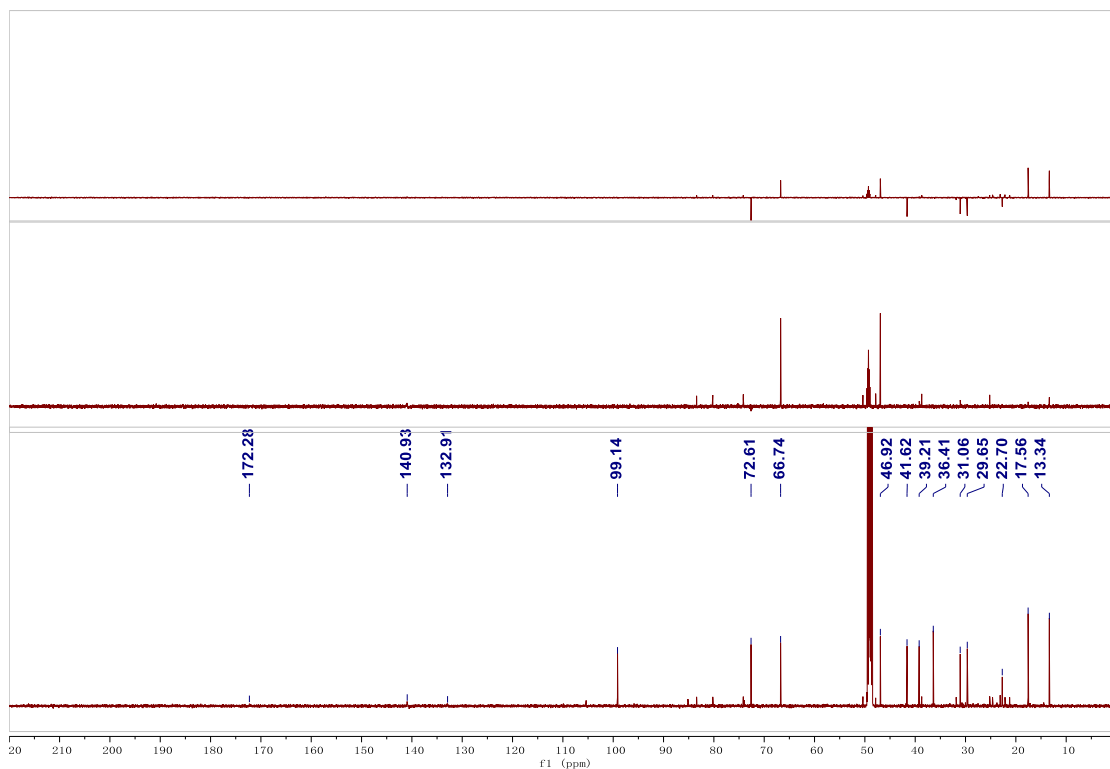

Figure S66. <sup>13</sup>C NMR spectrum of compound 8. (150 MHz, methanol-*d*<sub>4</sub>)

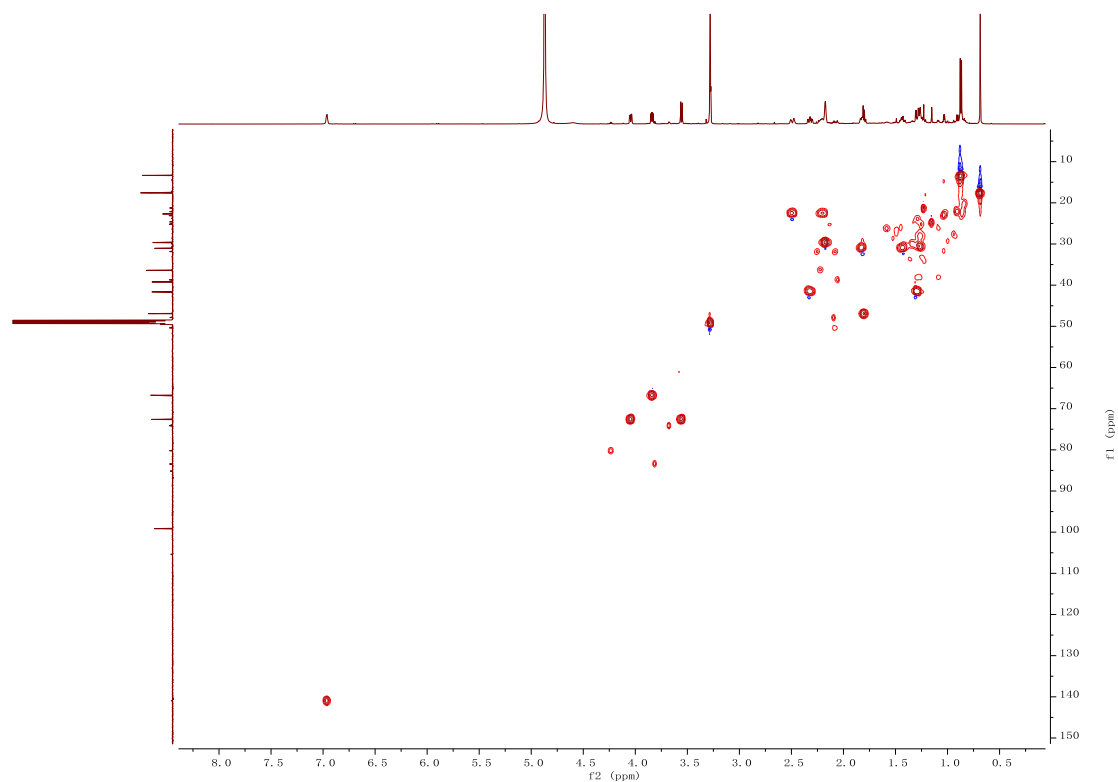

**Figure S67.** HSQC spectrum of compound 8

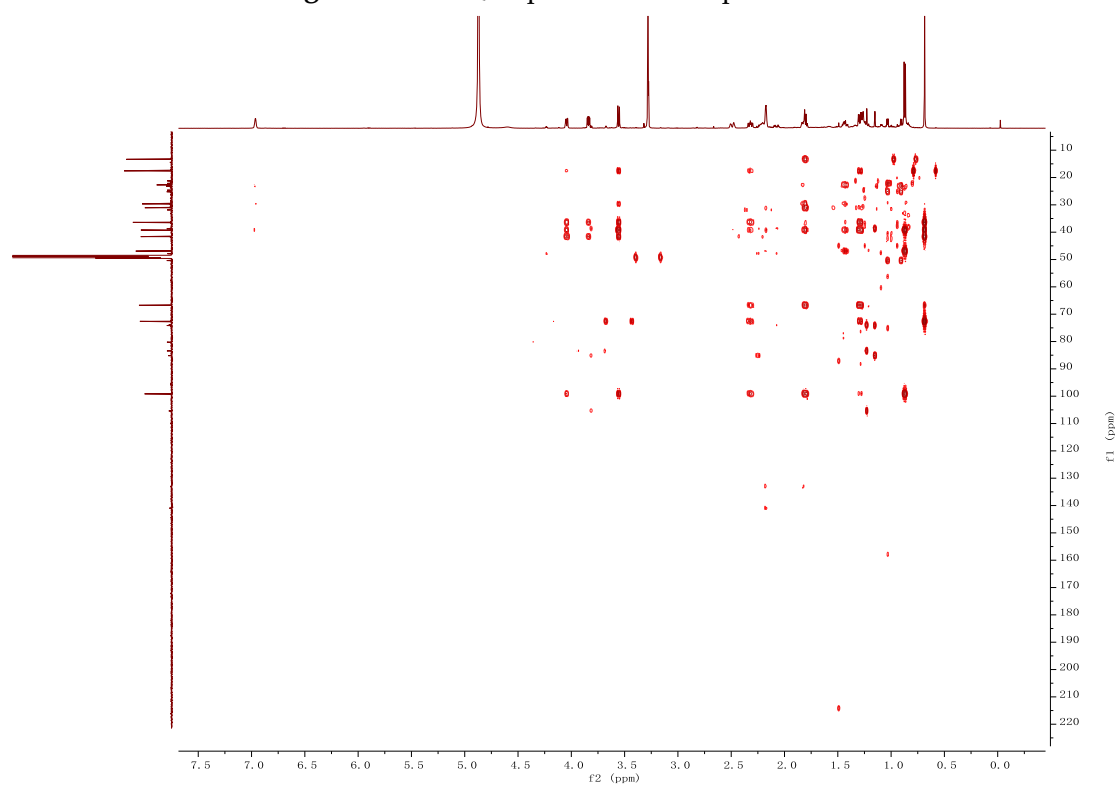

**Figure S68.** HMBC spectrum of compound 8

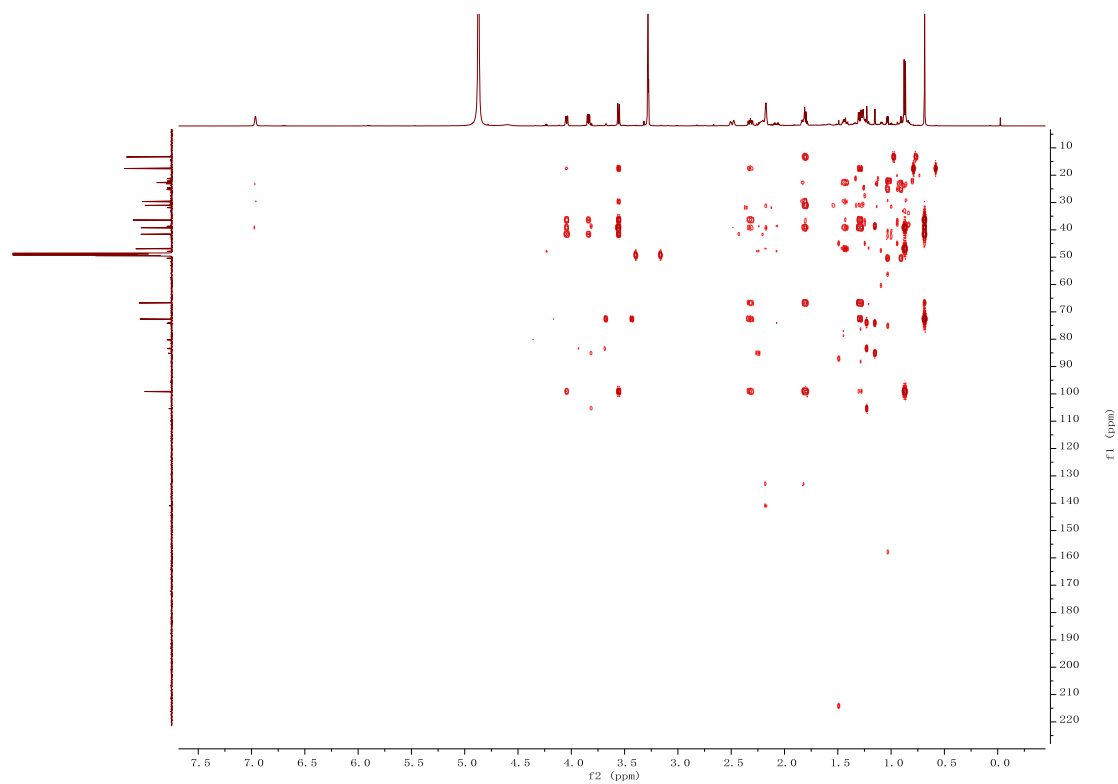

**Figure S69.**  $^1\text{H}$ - $^1\text{H}$  COSY spectrum of compound 8

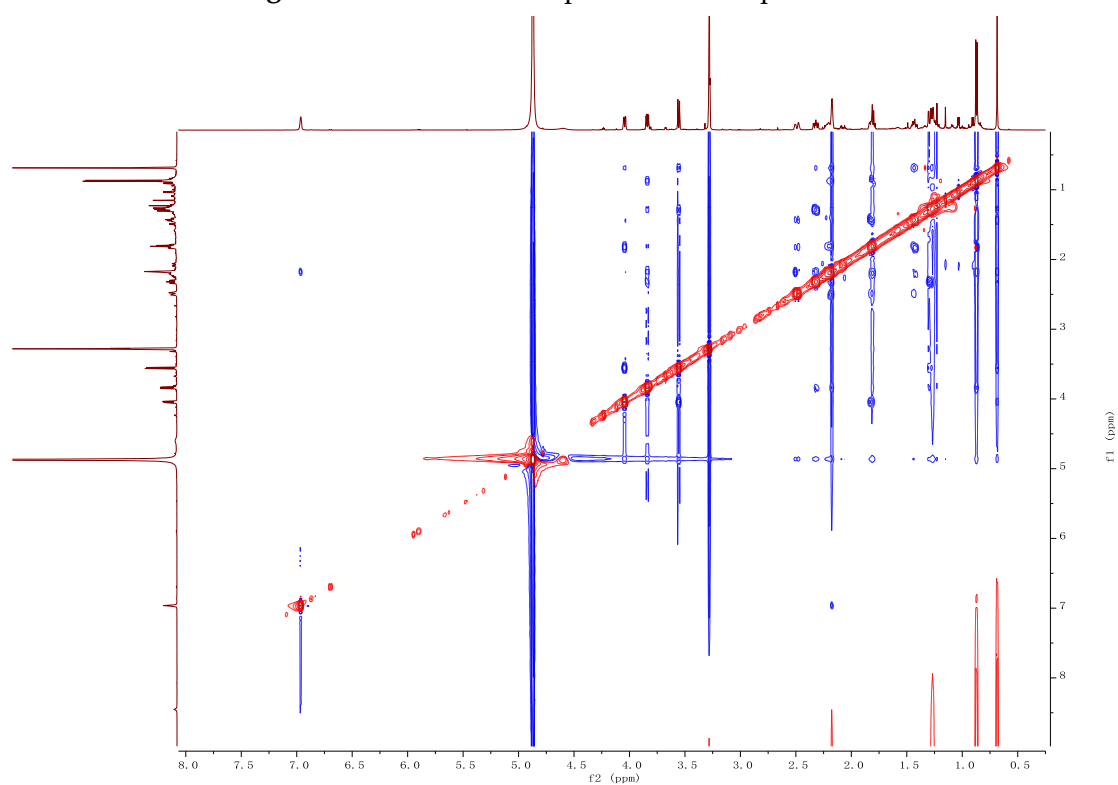

**Figure S70.** ROESY spectrum of compound 8

T: FTMS + p ESI Full lock ms [100.0000-800.0000]

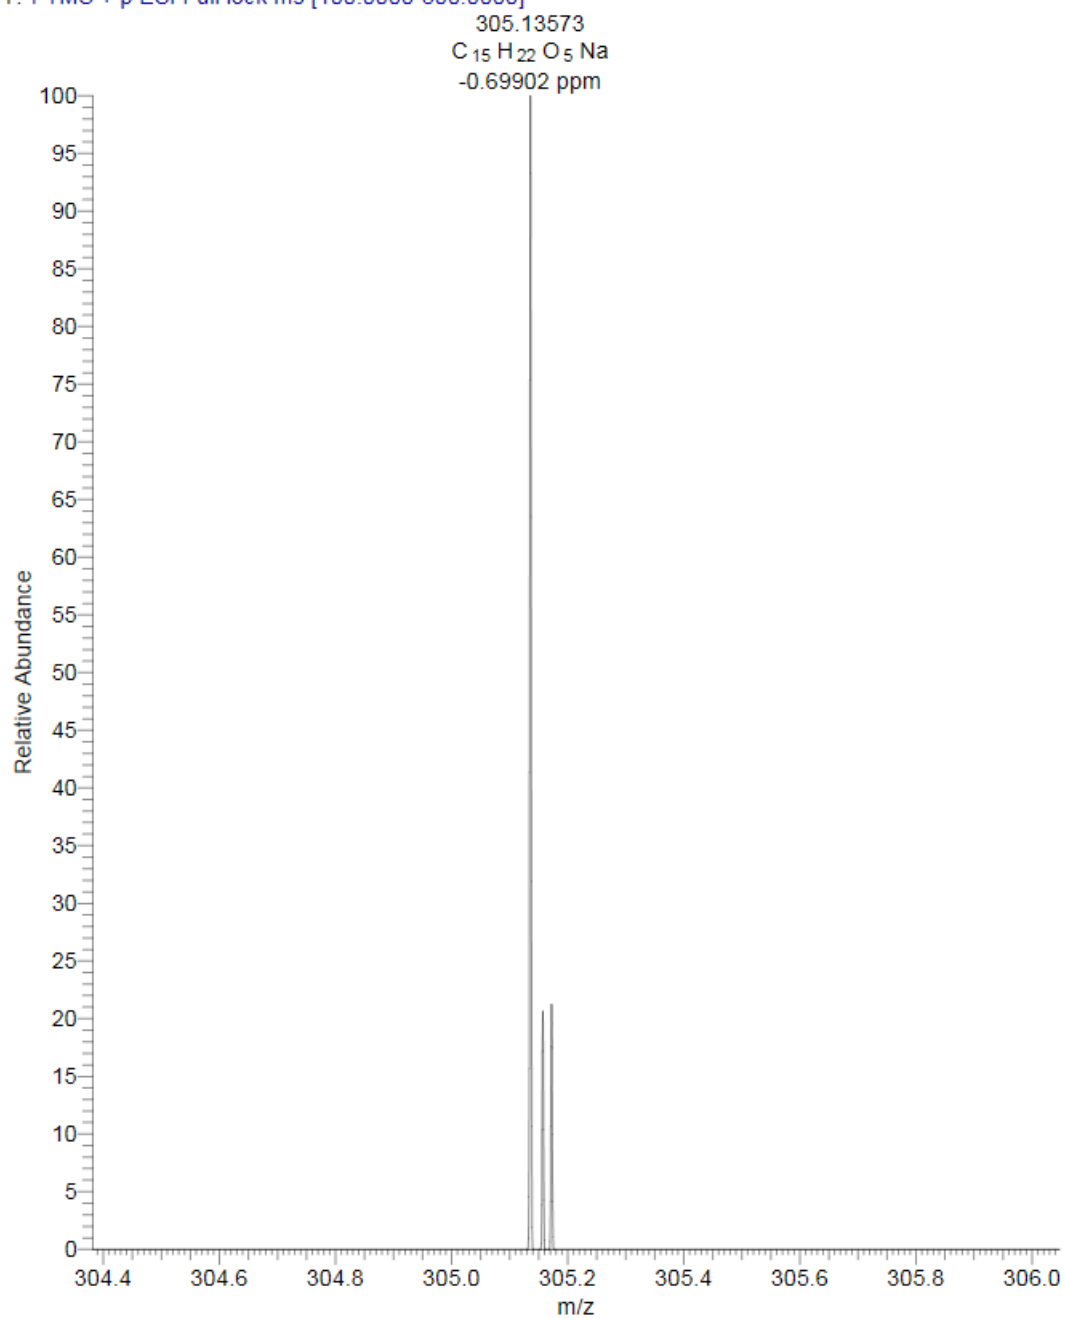

**Figure S71.** HRESIMS data of compound **8**
