# Supplementary material for: Sesquiterpenes from the Fungus Antrodiella albocinnamomea with Cytotoxicity and Antibacterial Activity
Source: J Fungi (Basel). 2023 Apr 28;9(5):521. doi: 10.3390/jof9050521 (PMC10219565; doi:10.3390/jof9050521)
Supplement: Supplementary file 1 [file jof-09-00521-s001.zip › Compound 1 cif.cif]

data_global
_audit_creation_method                  'APEX3 v2018.1-0'

_publ_requested_journal                 ?

_publ_contact_author_name               ?
_publ_contact_author_address            
;
;
_publ_contact_author_email              ?
_publ_contact_author_fax                ?
_publ_contact_author_phone              ?

_publ_section_title                     
;
;
_publ_section_abstract                  
;
;
_publ_section_references                
;
;
_publ_section_comment                   
;
;

data_lyw951
_chemical_name_systematic               ?
_chemical_name_common                   ?
_chemical_formula_moiety                'C15 H18 O4'
_chemical_formula_sum                   'C15 H18 O4'
_chemical_formula_iupac                 ?
_chemical_formula_weight                262.29

_chemical_melting_point                 ?

_space_group_crystal_system             orthorhombic
_space_group_name_H-M_alt               'P b c a'
_space_group_name_Hall                  '-P 2ac 2ab'
loop_
    _space_group_symop_operation_xyz
    'x, y, z'
    'x+1/2, -y+1/2, -z'
    '-x, y+1/2, -z+1/2'
    '-x+1/2, -y, z+1/2'
    '-x, -y, -z'
    '-x-1/2, y-1/2, z'
    'x, -y-1/2, z-1/2'
    'x-1/2, y, -z-1/2'

_cell_length_a                          11.1153(5)
_cell_length_b                          13.4703(6)
_cell_length_c                          18.6151(8)
_cell_angle_alpha                       90
_cell_angle_beta                        90
_cell_angle_gamma                       90
_cell_volume                            2787.2(2)
_cell_formula_units_Z                   8
_cell_measurement_reflns_used           9907
_cell_measurement_theta_min             4.7511
_cell_measurement_theta_max             72.1125
_cell_measurement_temperature           100.(2)

_exptl_crystal_description              prism
_exptl_crystal_colour                   'clear light colourless'
_exptl_crystal_size_max                 0.600
_exptl_crystal_size_mid                 0.130
_exptl_crystal_size_min                 0.110
_exptl_crystal_density_diffrn           1.250
_exptl_crystal_density_meas             ?
_exptl_crystal_density_method           'not measured'
_exptl_crystal_F_000                    1120

_exptl_absorpt_coefficient_mu           0.739
_exptl_absorpt_correction_type          Multi-Scan
_exptl_absorpt_process_details          
;
SADABS-2016/2 - Bruker AXS area detector scaling and absorption correction
;
_exptl_absorpt_correction_T_min         0.75
_exptl_absorpt_correction_T_max         0.92

_exptl_special_details                  
;
; 

_diffrn_ambient_temperature             100.(2)

_diffrn_source                          'Ius Diamond'
_diffrn_source_type                     Microfocus

_diffrn_radiation_type                  'Cu K\a'
_diffrn_radiation_wavelength            1.54178
_diffrn_radiation_monochromator         'Helixos MX multilayer Optic'

_diffrn_measurement_device_type         'Bruker D8 QUEST PHOTON II'
_diffrn_measurement_method              ?

_diffrn_detector_area_resol_mean        7.3910

_diffrn_reflns_number                   22765
_diffrn_reflns_av_R_equivalents         0.0608
_diffrn_reflns_av_unetI/netI            0.0306
_diffrn_reflns_theta_min                4.75
_diffrn_reflns_theta_max                72.11
_diffrn_reflns_theta_full               72.11
_diffrn_measured_fraction_theta_max     1.000
_diffrn_measured_fraction_theta_full    1.000
_diffrn_reflns_limit_h_min              -13
_diffrn_reflns_limit_h_max              10
_diffrn_reflns_limit_k_min              -16
_diffrn_reflns_limit_k_max              16
_diffrn_reflns_limit_l_min              -22
_diffrn_reflns_limit_l_max              22

_refine_special_details                 
;
;

_reflns_number_total                    2749
_reflns_number_gt                       2407
_reflns_threshold_expression            'I > 2\s(I)'

_refine_ls_structure_factor_coef        Fsqd
_refine_ls_matrix_type                  full
_refine_ls_R_factor_all                 0.0456
_refine_ls_R_factor_gt                  0.0347
_refine_ls_wR_factor_gt                 0.0923
_refine_ls_wR_factor_ref                0.0962
_refine_ls_goodness_of_fit_ref          1.055
_refine_ls_restrained_S_all             1.055
_refine_ls_number_reflns                2749
_refine_ls_number_parameters            177
_refine_ls_number_restraints            0
_refine_ls_number_constraints           ?
_refine_ls_hydrogen_treatment           constr
_refine_ls_weighting_scheme             calc
_refine_ls_weighting_details            
    'w=1/[\s^2^(Fo^2^)+(0.0545P)^2^+0.5485P] where P=(Fo^2^+2Fc^2^)/3'

_atom_sites_solution_hydrogens          geom
_atom_sites_solution_primary            ?
_atom_sites_solution_secondary          ?

_refine_ls_shift/su_max                 0.000
_refine_ls_shift/su_mean                0.000
_refine_diff_density_max                0.296
_refine_diff_density_min                -0.225
_refine_ls_extinction_method            none
_refine_ls_extinction_coef              ?

loop_
    _atom_type_symbol
    _atom_type_description
    _atom_type_scat_dispersion_real
    _atom_type_scat_dispersion_imag
    _atom_type_scat_source
    C C 0.0181 0.0091 'International Tables Vol C Tables 4.2.6.8 and 6.1.1.4'
    H H 0.0000 0.0000 'International Tables Vol C Tables 4.2.6.8 and 6.1.1.4'
    O O 0.0492 0.0322 'International Tables Vol C Tables 4.2.6.8 and 6.1.1.4'

_computing_data_collection              'Bruker Instrument Service vV6.2.9'
_computing_cell_refinement              'SAINT V8.38A (Bruker AXS Inc., 2017)'
_computing_data_reduction               'SAINT V8.38A (Bruker AXS Inc., 2017)'
_computing_structure_solution           'SHELXT 2014/5 (Sheldrick, 2014)'
_computing_structure_refinement         'SHELXL-2017/1 (Sheldrick, 2017)'
_computing_molecular_graphics           'shelXle (C.B. Huebschle, rev 882)'
_computing_publication_material         ?

loop_
    _atom_site_type_symbol
    _atom_site_label
    _atom_site_fract_x
    _atom_site_fract_y
    _atom_site_fract_z
    _atom_site_U_iso_or_equiv
    _atom_site_adp_type
    _atom_site_calc_flag
    _atom_site_refinement_flags_adp
    _atom_site_refinement_flags_occupancy
    _atom_site_refinement_flags_posn
    _atom_site_occupancy
    _atom_site_disorder_assembly
    _atom_site_disorder_group
    O O1 0.41627(7) 0.10623(6) 0.21204(6) 0.0311(2) Uani d . . . 1 . .
    H H18 0.348144 0.08022 0.217231 0.047 Uiso calc U . R 1 . .
    O O2 0.31897(7) 0.24187(6) 0.24845(5) 0.02261(19) Uani d . . . 1 . .
    O O3 0.45747(6) 0.41830(6) 0.20719(4) 0.01866(18) Uani d . . . 1 . .
    O O4 0.29348(7) 0.51114(7) 0.21682(5) 0.0259(2) Uani d . . . 1 . .
    C C1 0.59831(12) 0.16652(10) 0.42112(8) 0.0344(3) Uani d . . . 1 . .
    H H4 0.563959 0.168776 0.469581 0.052 Uiso calc U . R 1 . .
    H H5 0.668229 0.122201 0.42081 0.052 Uiso calc U . R 1 . .
    H H1 0.537732 0.141715 0.387349 0.052 Uiso calc U . R 1 . .
    C C2 0.63743(10) 0.27108(9) 0.39866(6) 0.0243(3) Uani d . . . 1 . .
    H H3 0.674606 0.265999 0.349877 0.029 Uiso calc U . R 1 . .
    C C3 0.52933(9) 0.33943(9) 0.39269(6) 0.0202(2) Uani d . . . 1 . .
    C C4 0.48643(9) 0.37393(8) 0.32716(6) 0.0173(2) Uani d . . . 1 . .
    C C5 0.38688(9) 0.43626(8) 0.32258(6) 0.0182(2) Uani d . . . 1 . .
    C C6 0.32159(9) 0.46687(8) 0.38270(6) 0.0202(2) Uani d . . . 1 . .
    C C7 0.21141(9) 0.53184(9) 0.37849(7) 0.0245(3) Uani d . . . 1 . .
    H H9 0.185457 0.549654 0.427119 0.037 Uiso calc U . R 1 . .
    H H2 0.146647 0.495801 0.354076 0.037 Uiso calc U . R 1 . .
    H H10 0.230505 0.592309 0.351524 0.037 Uiso calc U . R 1 . .
    C C8 0.41073(9) 0.20152(8) 0.22968(6) 0.0178(2) Uani d . . . 1 . .
    C C9 0.53280(8) 0.25068(8) 0.22275(6) 0.0165(2) Uani d . . . 1 . .
    H H17 0.591327 0.210752 0.251557 0.02 Uiso calc U . R 1 . .
    C C10 0.53405(9) 0.35667(8) 0.25247(6) 0.0165(2) Uani d . . . 1 . .
    H H13 0.618176 0.382728 0.249911 0.02 Uiso calc U . R 1 . .
    C C11 0.36961(9) 0.46111(8) 0.24652(6) 0.0187(2) Uani d . . . 1 . .
    C C12 0.73287(11) 0.31271(11) 0.44967(7) 0.0326(3) Uani d . . . 1 . .
    H H7 0.757511 0.378791 0.43327 0.049 Uiso calc U . R 1 . .
    H H8 0.802861 0.268476 0.450161 0.049 Uiso calc U . R 1 . .
    H H6 0.699365 0.317538 0.498237 0.049 Uiso calc U . R 1 . .
    C C13 0.46530(10) 0.37103(9) 0.45333(6) 0.0244(2) Uani d . . . 1 . .
    H H12 0.491476 0.349956 0.499456 0.029 Uiso calc U . R 1 . .
    C C14 0.36450(10) 0.43233(9) 0.44844(6) 0.0238(2) Uani d . . . 1 . .
    H H11 0.323857 0.451095 0.491236 0.029 Uiso calc U . R 1 . .
    C C15 0.57538(9) 0.24897(8) 0.14418(6) 0.0216(2) Uani d . . . 1 . .
    H H15 0.574837 0.180492 0.126411 0.032 Uiso calc U . R 1 . .
    H H14 0.65721 0.275751 0.141244 0.032 Uiso calc U . R 1 . .
    H H16 0.521237 0.289586 0.114813 0.032 Uiso calc U . R 1 . .

loop_
    _atom_site_aniso_label
    _atom_site_aniso_U_11
    _atom_site_aniso_U_22
    _atom_site_aniso_U_33
    _atom_site_aniso_U_12
    _atom_site_aniso_U_13
    _atom_site_aniso_U_23
    O1 0.0175(4) 0.0200(4) 0.0559(6) -0.0027(3) 0.0066(4) -0.0059(4)
    O2 0.0124(4) 0.0236(4) 0.0319(4) -0.0003(3) 0.0018(3) -0.0045(3)
    O3 0.0158(3) 0.0200(4) 0.0201(4) 0.0030(3) 0.0013(3) 0.0028(3)
    O4 0.0221(4) 0.0262(4) 0.0292(4) 0.0080(3) -0.0001(3) 0.0037(3)
    C1 0.0346(6) 0.0307(6) 0.0378(7) 0.0073(5) -0.0047(5) -0.0004(5)
    C2 0.0187(5) 0.0337(6) 0.0205(5) 0.0063(5) -0.0027(4) -0.0011(4)
    C3 0.0156(5) 0.0247(5) 0.0204(5) -0.0009(4) -0.0008(4) -0.0013(4)
    C4 0.0132(4) 0.0182(5) 0.0205(5) -0.0028(4) 0.0005(4) -0.0014(4)
    C5 0.0137(4) 0.0175(5) 0.0233(5) -0.0027(4) 0.0003(4) -0.0011(4)
    C6 0.0147(5) 0.0200(5) 0.0261(5) -0.0038(4) 0.0024(4) -0.0049(4)
    C7 0.0171(5) 0.0261(6) 0.0302(6) 0.0016(4) 0.0005(4) -0.0084(4)
    C8 0.0138(5) 0.0198(5) 0.0197(5) 0.0000(4) -0.0012(4) 0.0007(4)
    C9 0.0104(4) 0.0192(5) 0.0199(5) 0.0008(4) -0.0005(4) -0.0002(4)
    C10 0.0117(4) 0.0188(5) 0.0190(5) -0.0001(4) -0.0006(4) 0.0016(4)
    C11 0.0145(5) 0.0166(5) 0.0249(6) -0.0008(4) 0.0014(4) -0.0003(4)
    C12 0.0216(5) 0.0455(7) 0.0307(6) 0.0039(5) -0.0085(5) -0.0030(6)
    C13 0.0217(5) 0.0316(6) 0.0199(5) 0.0000(4) 0.0004(4) -0.0005(5)
    C14 0.0195(5) 0.0302(6) 0.0217(5) -0.0018(4) 0.0039(4) -0.0052(4)
    C15 0.0179(5) 0.0265(5) 0.0204(5) 0.0008(4) 0.0020(4) -0.0016(4)

_geom_special_details                   
;

All esds (except the esd in the dihedral angle between two l.s. planes)
are estimated using the full covariance matrix.  The cell esds are taken
into account individually in the estimation of esds in distances, angles
and torsion angles; correlations between esds in cell parameters are only
used when they are defined by crystal symmetry.  An approximate (isotropic)
treatment of cell esds is used for estimating esds involving l.s. planes.
;

loop_
    _geom_bond_atom_site_label_1
    _geom_bond_atom_site_label_2
    _geom_bond_site_symmetry_2
    _geom_bond_distance
    _geom_bond_publ_flag
    O1 C8 . 1.3264(14) ?
    O1 H18 . 0.84 ?
    O2 C8 . 1.2074(14) ?
    O3 C11 . 1.3499(13) ?
    O3 C10 . 1.4575(12) ?
    O4 C11 . 1.2149(14) ?
    C1 C2 . 1.5322(19) ?
    C1 H4 . 0.98 ?
    C1 H5 . 0.98 ?
    C1 H1 . 0.98 ?
    C2 C3 . 1.5178(15) ?
    C2 C12 . 1.5302(16) ?
    C2 H3 . 1.0 ?
    C3 C4 . 1.3896(15) ?
    C3 C13 . 1.4008(16) ?
    C4 C5 . 1.3916(15) ?
    C4 C10 . 1.5057(14) ?
    C5 C6 . 1.3962(15) ?
    C5 C11 . 1.4674(15) ?
    C6 C14 . 1.3935(17) ?
    C6 C7 . 1.5073(15) ?
    C7 H9 . 0.98 ?
    C7 H2 . 0.98 ?
    C7 H10 . 0.98 ?
    C8 C9 . 1.5153(13) ?
    C9 C10 . 1.5312(14) ?
    C9 C15 . 1.5374(14) ?
    C9 H17 . 1.0 ?
    C10 H13 . 1.0 ?
    C12 H7 . 0.98 ?
    C12 H8 . 0.98 ?
    C12 H6 . 0.98 ?
    C13 C14 . 1.3947(17) ?
    C13 H12 . 0.95 ?
    C14 H11 . 0.95 ?
    C15 H15 . 0.98 ?
    C15 H14 . 0.98 ?
    C15 H16 . 0.98 ?

loop_
    _geom_angle_atom_site_label_1
    _geom_angle_atom_site_label_2
    _geom_angle_atom_site_label_3
    _geom_angle_site_symmetry_1
    _geom_angle_site_symmetry_3
    _geom_angle
    _geom_angle_publ_flag
    C8 O1 H18 . . 109.5 ?
    C11 O3 C10 . . 110.62(8) ?
    C2 C1 H4 . . 109.5 ?
    C2 C1 H5 . . 109.5 ?
    H4 C1 H5 . . 109.5 ?
    C2 C1 H1 . . 109.5 ?
    H4 C1 H1 . . 109.5 ?
    H5 C1 H1 . . 109.5 ?
    C3 C2 C12 . . 111.84(10) ?
    C3 C2 C1 . . 110.66(10) ?
    C12 C2 C1 . . 111.36(11) ?
    C3 C2 H3 . . 107.6 ?
    C12 C2 H3 . . 107.6 ?
    C1 C2 H3 . . 107.6 ?
    C4 C3 C13 . . 115.56(10) ?
    C4 C3 C2 . . 122.60(10) ?
    C13 C3 C2 . . 121.84(10) ?
    C3 C4 C5 . . 121.90(10) ?
    C3 C4 C10 . . 129.66(10) ?
    C5 C4 C10 . . 108.42(9) ?
    C4 C5 C6 . . 122.84(11) ?
    C4 C5 C11 . . 107.51(9) ?
    C6 C5 C11 . . 129.64(10) ?
    C14 C6 C5 . . 115.31(10) ?
    C14 C6 C7 . . 121.17(10) ?
    C5 C6 C7 . . 123.51(11) ?
    C6 C7 H9 . . 109.5 ?
    C6 C7 H2 . . 109.5 ?
    H9 C7 H2 . . 109.5 ?
    C6 C7 H10 . . 109.5 ?
    H9 C7 H10 . . 109.5 ?
    H2 C7 H10 . . 109.5 ?
    O2 C8 O1 . . 123.12(9) ?
    O2 C8 C9 . . 125.76(10) ?
    O1 C8 C9 . . 111.12(9) ?
    C8 C9 C10 . . 112.63(8) ?
    C8 C9 C15 . . 110.49(8) ?
    C10 C9 C15 . . 110.79(9) ?
    C8 C9 H17 . . 107.6 ?
    C10 C9 H17 . . 107.6 ?
    C15 C9 H17 . . 107.6 ?
    O3 C10 C4 . . 103.93(8) ?
    O3 C10 C9 . . 108.47(8) ?
    C4 C10 C9 . . 118.33(9) ?
    O3 C10 H13 . . 108.6 ?
    C4 C10 H13 . . 108.6 ?
    C9 C10 H13 . . 108.6 ?
    O4 C11 O3 . . 119.61(11) ?
    O4 C11 C5 . . 131.05(10) ?
    O3 C11 C5 . . 109.34(9) ?
    C2 C12 H7 . . 109.5 ?
    C2 C12 H8 . . 109.5 ?
    H7 C12 H8 . . 109.5 ?
    C2 C12 H6 . . 109.5 ?
    H7 C12 H6 . . 109.5 ?
    H8 C12 H6 . . 109.5 ?
    C14 C13 C3 . . 122.38(11) ?
    C14 C13 H12 . . 118.8 ?
    C3 C13 H12 . . 118.8 ?
    C6 C14 C13 . . 122.00(10) ?
    C6 C14 H11 . . 119.0 ?
    C13 C14 H11 . . 119.0 ?
    C9 C15 H15 . . 109.5 ?
    C9 C15 H14 . . 109.5 ?
    H15 C15 H14 . . 109.5 ?
    C9 C15 H16 . . 109.5 ?
    H15 C15 H16 . . 109.5 ?
    H14 C15 H16 . . 109.5 ?

loop_
    _geom_torsion_atom_site_label_1
    _geom_torsion_atom_site_label_2
    _geom_torsion_atom_site_label_3
    _geom_torsion_atom_site_label_4
    _geom_torsion_site_symmetry_1
    _geom_torsion_site_symmetry_2
    _geom_torsion_site_symmetry_3
    _geom_torsion_site_symmetry_4
    _geom_torsion
    _geom_torsion_publ_flag
    C12 C2 C3 C4 . . . . 126.00(12) ?
    C1 C2 C3 C4 . . . . -109.22(12) ?
    C12 C2 C3 C13 . . . . -54.72(15) ?
    C1 C2 C3 C13 . . . . 70.07(14) ?
    C13 C3 C4 C5 . . . . 0.42(16) ?
    C2 C3 C4 C5 . . . . 179.74(10) ?
    C13 C3 C4 C10 . . . . 178.65(10) ?
    C2 C3 C4 C10 . . . . -2.02(18) ?
    C3 C4 C5 C6 . . . . -1.41(16) ?
    C10 C4 C5 C6 . . . . -179.98(9) ?
    C3 C4 C5 C11 . . . . 177.80(10) ?
    C10 C4 C5 C11 . . . . -0.77(11) ?
    C4 C5 C6 C14 . . . . 1.32(15) ?
    C11 C5 C6 C14 . . . . -177.71(10) ?
    C4 C5 C6 C7 . . . . -178.10(10) ?
    C11 C5 C6 C7 . . . . 2.87(17) ?
    O2 C8 C9 C10 . . . . 8.13(15) ?
    O1 C8 C9 C10 . . . . -172.04(9) ?
    O2 C8 C9 C15 . . . . -116.36(12) ?
    O1 C8 C9 C15 . . . . 63.46(12) ?
    C11 O3 C10 C4 . . . . -4.31(11) ?
    C11 O3 C10 C9 . . . . 122.44(9) ?
    C3 C4 C10 O3 . . . . -175.44(10) ?
    C5 C4 C10 O3 . . . . 2.99(11) ?
    C3 C4 C10 C9 . . . . 64.26(14) ?
    C5 C4 C10 C9 . . . . -117.32(10) ?
    C8 C9 C10 O3 . . . . -66.67(11) ?
    C15 C9 C10 O3 . . . . 57.66(10) ?
    C8 C9 C10 C4 . . . . 51.26(12) ?
    C15 C9 C10 C4 . . . . 175.59(8) ?
    C10 O3 C11 O4 . . . . -176.23(9) ?
    C10 O3 C11 C5 . . . . 4.02(11) ?
    C4 C5 C11 O4 . . . . 178.31(11) ?
    C6 C5 C11 O4 . . . . -2.5(2) ?
    C4 C5 C11 O3 . . . . -1.99(11) ?
    C6 C5 C11 O3 . . . . 177.16(10) ?
    C4 C3 C13 C14 . . . . 0.55(17) ?
    C2 C3 C13 C14 . . . . -178.78(11) ?
    C5 C6 C14 C13 . . . . -0.34(16) ?
    C7 C6 C14 C13 . . . . 179.10(10) ?
    C3 C13 C14 C6 . . . . -0.59(18) ?

loop_
    _geom_hbond_atom_site_label_D
    _geom_hbond_atom_site_label_H
    _geom_hbond_atom_site_label_A
    _geom_hbond_site_symmetry_A
    _geom_hbond_distance_DH
    _geom_hbond_distance_HA
    _geom_hbond_distance_DA
    _geom_hbond_angle_DHA
    _geom_hbond_publ_flag
    O1 H18 O4 6_655 0.84 1.83 2.6617(11) 171.1 ?
    C9 H17 O2 8_656 1.00 2.56 3.2279(12) 123.6 ?

_shelx_res_file                         
;

TITL lyw951_0m_a.res in Pbca
    lyw951_0m.res
    created by SHELXL-2017/1 at 15:07:17 on 15-Jul-2021
CELL 1.54178 11.1153 13.4703 18.6151 90.000 90.000 90.000
ZERR 8.00 0.0005 0.0006 0.0008 0.000 0.000 0.000
LATT 1
SYMM x+1/2, -y+1/2, -z
SYMM -x, y+1/2, -z+1/2
SYMM -x+1/2, -y, z+1/2
SFAC C H O
UNIT 120 144 32
LIST 4 ! automatically inserted. Change 6 to 4 for CHECKCIF!!
TEMP -173.180
SIZE 0.110 0.130 0.600
ACTA
EQIV $1 -x+1/2, y-1/2, z
HTAB O1 O4_$1
EQIV $2 x+1/2, y, -z+1/2
HTAB C9 O2_$2
L.S. 4
FMAP 2
PLAN -4 0 0.00
HTAB
BOND $H
CONF
WGHT    0.054500    0.548500
FVAR       0.37251
O1    3    0.416274    0.106232    0.212038    11.00000    0.01746    0.02003 =
         0.05587   -0.00592    0.00657   -0.00273
AFIX 147
H18   2    0.348144    0.080220    0.217231    11.00000   -1.50000
AFIX   0
O2    3    0.318969    0.241865    0.248451    11.00000    0.01237    0.02358 =
         0.03189   -0.00446    0.00176   -0.00027
O3    3    0.457472    0.418300    0.207195    11.00000    0.01584    0.02004 =
         0.02011    0.00276    0.00135    0.00296
O4    3    0.293479    0.511139    0.216825    11.00000    0.02213    0.02623 =
         0.02922    0.00368   -0.00007    0.00798
C1    1    0.598313    0.166523    0.421124    11.00000    0.03461    0.03074 =
         0.03783   -0.00038   -0.00466    0.00729
AFIX 137
H4    2    0.563959    0.168776    0.469581    11.00000   -1.50000
H5    2    0.668229    0.122201    0.420810    11.00000   -1.50000
H1    2    0.537732    0.141715    0.387349    11.00000   -1.50000
AFIX   0
C2    1    0.637433    0.271084    0.398658    11.00000    0.01869    0.03366 =
         0.02047   -0.00107   -0.00273    0.00627
AFIX  13
H3    2    0.674606    0.265999    0.349877    11.00000   -1.20000
AFIX   0
C3    1    0.529331    0.339430    0.392686    11.00000    0.01562    0.02471 =
         0.02037   -0.00132   -0.00084   -0.00093
C4    1    0.486430    0.373927    0.327164    11.00000    0.01324    0.01824 =
         0.02046   -0.00139    0.00049   -0.00284
C5    1    0.386885    0.436259    0.322576    11.00000    0.01371    0.01752 =
         0.02328   -0.00113    0.00033   -0.00274
C6    1    0.321590    0.466867    0.382697    11.00000    0.01466    0.01996 =
         0.02606   -0.00490    0.00241   -0.00383
C7    1    0.211415    0.531840    0.378486    11.00000    0.01710    0.02613 =
         0.03023   -0.00844    0.00052    0.00164
AFIX 137
H9    2    0.185457    0.549654    0.427119    11.00000   -1.50000
H2    2    0.146647    0.495801    0.354076    11.00000   -1.50000
H10   2    0.230505    0.592309    0.351524    11.00000   -1.50000
AFIX   0
C8    1    0.410734    0.201523    0.229679    11.00000    0.01382    0.01975 =
         0.01971    0.00072   -0.00115    0.00004
C9    1    0.532802    0.250680    0.222750    11.00000    0.01045    0.01916 =
         0.01988   -0.00016   -0.00053    0.00082
AFIX  13
H17   2    0.591327    0.210752    0.251557    11.00000   -1.20000
AFIX   0
C10   1    0.534046    0.356665    0.252474    11.00000    0.01171    0.01885 =
         0.01902    0.00160   -0.00055   -0.00014
AFIX  13
H13   2    0.618176    0.382728    0.249911    11.00000   -1.20000
AFIX   0
C11   1    0.369613    0.461109    0.246523    11.00000    0.01455    0.01662 =
         0.02486   -0.00026    0.00141   -0.00083
C12   1    0.732871    0.312714    0.449666    11.00000    0.02161    0.04545 =
         0.03066   -0.00303   -0.00846    0.00392
AFIX 137
H7    2    0.757511    0.378791    0.433270    11.00000   -1.50000
H8    2    0.802861    0.268476    0.450161    11.00000   -1.50000
H6    2    0.699365    0.317538    0.498237    11.00000   -1.50000
AFIX   0
C13   1    0.465297    0.371033    0.453332    11.00000    0.02172    0.03163 =
         0.01995   -0.00055    0.00041   -0.00003
AFIX  43
H12   2    0.491476    0.349956    0.499456    11.00000   -1.20000
AFIX   0
C14   1    0.364497    0.432325    0.448445    11.00000    0.01951    0.03024 =
         0.02165   -0.00517    0.00389   -0.00181
AFIX  43
H11   2    0.323857    0.451095    0.491236    11.00000   -1.20000
AFIX   0
C15   1    0.575381    0.248973    0.144183    11.00000    0.01794    0.02645 =
         0.02038   -0.00158    0.00198    0.00077
AFIX 137
H15   2    0.574837    0.180492    0.126411    11.00000   -1.50000
H14   2    0.657210    0.275751    0.141244    11.00000   -1.50000
H16   2    0.521237    0.289586    0.114813    11.00000   -1.50000

AFIX   0
HKLF 4 1 1 0 0 0 1 0 0 0 1


REM  lyw951_0m_a.res in Pbca
REM R1 =  0.0347 for    2407 Fo > 4sig(Fo)  and  0.0456 for all    2749 data
REM    177 parameters refined using      0 restraints

END

WGHT      0.0545      0.5485

REM Instructions for potential hydrogen bonds
HTAB O1 O4_$1
HTAB C9 O2_$2

REM Highest difference peak  0.296,  deepest hole -0.225,  1-sigma level  0.041
Q1    1   0.5350  0.3028  0.2393  11.00000  0.05    0.30
Q2    1   0.5154  0.3631  0.2914  11.00000  0.05    0.27
Q3    1   0.5218  0.3622  0.3592  11.00000  0.05    0.26
Q4    1   0.5503  0.2469  0.1831  11.00000  0.05    0.24
;
_shelx_res_checksum                     11740

_shelx_hkl_file                         
;
  -1   0   0   -0.30    0.30
   1   0   0    0.30    0.50
  -2   0   0 1622.84   63.29
  -3   0   0    1.30    1.50
  -4   0   0   12.80    3.20
  -6   0   0   22.50    5.40
  -7   0   0    0.20    0.40
  -7   0   0    0.10    0.60
  -7   0   0    0.60    1.00
  -7   0   0    4.10    2.70
  -7   0   0   -0.70    0.40
   7   0   0    0.10    1.20
  -8   0   0   88.39    4.80
  -8   0   0   86.19    4.20
   8   0   0   92.09    9.10
  -8   0   0   82.29    5.20
  -8   0   0   87.79    6.40
  -8   0   0   83.39    4.10
  -8   0   0   79.59    4.30
  -9   0   0   -0.50    0.60
  -9   0   0    1.10    2.40
   9   0   0   -3.90    2.80
  -9   0   0   -0.30    0.60
  -9   0   0    0.60    0.50
  -9   0   0    1.80    0.60
  -9   0   0   -1.30    1.20
 -10   0   0   28.80    2.10
 -10   0   0   29.80    2.70
 -10   0   0   28.40    3.30
 -10   0   0   27.70    2.20
 -10   0   0   30.10    2.20
 -10   0   0   35.90    4.10
 -11   0   0    0.60    1.20
 -11   0   0   -0.10    0.60
 -11   0   0    0.50    0.50
 -11   0   0    1.60    1.40
 -11   0   0    1.10    0.70
 -11   0   0    0.00    0.70
 -12   0   0  171.68    7.10
 -12   0   0  177.38    7.20
 -12   0   0  170.58    7.20
 -13   0   0    0.30    0.40
   0   1   0    0.80    0.60
  -1  -1   0    1.40    1.20
  -1   1   0    0.40    0.70
  -1   1   0    0.20    0.60
   1  -1   0    0.70    0.20
  -2  -1   0    9.20    2.10
  -2   1   0    5.70    2.20
  -2  -1   0    8.60    2.50
  -2  -1   0    4.80    2.00
  -3   1   0   -1.70    1.10
  -3  -1   0   -0.50    1.00
  -3  -1   0   -0.80    1.30
  -4  -1   0  466.85   22.40
  -4   1   0  470.25   25.10
  -4  -1   0  458.55   20.20
  -4  -1   0  466.15   20.20
  -5  -1   0   -0.50    1.30
  -5   1   0    1.00    2.30
  -6   1   0    8.70    4.10
  -6  -1   0   11.90    3.50
   6  -1   0   13.10    2.30
  -7  -1   0    0.40    0.90
  -7  -1   0    0.70    0.40
   7   1   0    0.40    1.00
  -7  -1   0    1.20    0.50
  -7   1   0   -0.20    0.60
  -7   1   0    0.60    0.40
  -7   1   0   -0.60    0.50
  -7   1   0    0.00    0.40
  -7  -1   0    1.20    0.60
  -7   1   0    2.40    1.10
  -7  -1   0   -0.30    1.00
   7  -1   0    0.70    1.20
  -7   1   0    1.00    1.20
  -7  -1   0    0.60    0.50
  -8  -1   0   25.20    1.90
  -8  -1   0   25.70    2.80
   8   1   0   28.10    4.60
  -8   1   0   31.40    3.80
  -8   1   0   32.00    7.80
  -8   1   0   27.40    1.90
  -8   1   0   25.90    2.40
  -8  -1   0   26.80    2.10
  -8   1   0   24.30    2.00
   8  -1   0   19.60    3.90
  -8   1   0   28.90    3.00
  -8  -1   0   26.60    3.50
  -8  -1   0   26.00    1.90
  -8  -1   0   28.50    2.40
  -8   1   0   25.30    1.90
  -9  -1   0    0.00    0.60
  -9   1   0   -0.20    0.70
  -9  -1   0   -0.10    0.60
  -9   1   0    0.40    1.40
  -9  -1   0   -0.20    1.30
  -9  -1   0    0.00    0.60
  -9   1   0    0.00    1.40
   9   1   0    3.60    2.60
  -9  -1   0   -0.70    1.20
  -9   1   0    1.00    0.60
  -9  -1   0    0.30    0.50
  -9   1   0   -0.30    0.70
  -9   1   0    0.00    0.50
 -10  -1   0  203.18    8.80
 -10   1   0  208.38    8.80
 -10  -1   0  201.38    9.70
 -10   1   0  213.48   11.50
 -10   1   0  209.38    8.80
 -10   1   0  206.38   10.20
 -10  -1   0  208.18    9.40
 -10  -1   0  212.68    8.90
 -10   1   0  211.28    9.50
 -10  -1   0  197.58    8.90
 -10   1   0  205.38    9.00
 -10  -1   0  215.18   11.20
 -11   1   0    0.20    0.60
 -11   1   0    0.60    0.60
 -11   1   0    0.40    0.70
 -11  -1   0   -0.30    0.50
 -11   1   0   -0.60    1.10
 -11   1   0    0.00    0.50
 -11  -1   0    0.50    1.30
 -11  -1   0   -0.30    0.50
 -11  -1   0   -0.80    0.50
 -11   1   0   -0.50    1.40
 -11  -1   0    0.70    0.50
 -12  -1   0   70.29    3.40
 -12  -1   0   67.69    3.40
 -12   1   0   69.49    3.30
 -12   1   0   67.49    3.70
 -12   1   0   70.09    3.40
 -12  -1   0   72.09    3.40
 -12   1   0   69.89    4.30
 -12   1   0   67.19    3.30
 -13  -1   0    0.50    0.40
 -13  -1   0    0.30    0.30
   0   2   0  300.07   12.30
   0   2   0  320.27   17.40
   1  -2   0    0.30    0.40
  -1   2   0   -0.10    1.10
  -1   2   0   -0.10    0.10
  -1   2   0   -0.50    0.50
  -2   2   0 1944.21   73.79
  -2  -2   0 1783.22   78.59
   2  -2   0 1781.92   68.09
  -2  -2   0 1897.91   76.09
  -3  -2   0   -0.60    1.90
  -3   2   0   -0.30    1.20
  -3  -2   0   -1.90    2.00
  -4   2   0   35.40    6.10
  -4  -2   0   39.60    5.80
  -4  -2   0   48.30    6.40
  -5  -2   0   -3.40    2.10
  -5   2   0   -0.90    1.70
  -5  -2   0    2.50    2.10
   6  -2   0   33.90    3.30
   6   2   0   33.50    4.30
  -6   2   0   28.20    6.70
  -7   2   0    0.30    0.40
  -7  -2   0   -0.30    0.50
  -7   2   0    0.90    1.10
  -7   2   0   -0.10    0.40
   7  -2   0   -1.40    1.20
   7   2   0   -1.90    1.50
  -7  -2   0   -0.90    0.80
  -7  -2   0   -0.40    0.50
  -7   2   0    4.00    3.70
  -7  -2   0   -0.20    0.40
  -7   2   0   -0.50    0.40
  -7  -2   0   -0.30    0.40
  -7   2   0    0.00    1.20
  -7   2   0    2.10    0.80
  -7  -2   0    0.80    0.90
  -8   2   0   23.90    2.30
  -8   2   0   24.40    3.00
  -8  -2   0   23.80    2.70
  -8  -2   0   26.20    3.30
  -8  -2   0   25.40    1.90
  -8   2   0   26.40    3.80
  -8  -2   0   21.70    2.10
  -8   2   0   25.90    2.00
  -8  -2   0   23.10    1.80
  -8   2   0   23.90    1.80
  -8  -2   0   22.50    1.90
  -8   2   0   23.70    1.80
   8   2   0   25.80    4.40
  -8   2   0   14.00    5.50
  -9  -2   0    0.30    1.30
  -9   2   0    0.60    1.60
  -9   2   0    0.00    0.60
  -9  -2   0   -0.90    0.40
  -9  -2   0    0.60    0.60
  -9   2   0    0.00    0.50
  -9  -2   0   -0.20    0.70
  -9  -2   0    0.50    0.60
  -9  -2   0   -1.00    1.20
  -9   2   0    0.20    0.70
  -9   2   0   -1.10    1.30
   9   2   0    1.80    2.60
  -9   2   0    0.00    0.50
 -10   2   0   34.00    2.80
 -10   2   0   32.10    4.30
 -10  -2   0   33.20    2.30
 -10  -2   0   33.80    2.70
 -10  -2   0   35.20    3.80
 -10   2   0   32.20    2.20
 -10  -2   0   31.50    2.40
 -10   2   0   33.40    2.40
  10   2   0   38.90    7.90
 -10  -2   0   32.70    2.30
 -10   2   0   35.10    3.70
 -10   2   0   30.90    2.20
 -11  -2   0    0.10    0.50
 -11   2   0    0.20    0.60
 -11   2   0   -0.40    1.20
 -11   2   0    0.30    0.50
 -11  -2   0    0.20    0.50
 -11  -2   0   -0.30    0.50
 -11   2   0    0.50    0.50
 -11   2   0   -2.40    1.20
 -11  -2   0    0.00    0.70
 -12  -2   0  199.28    8.20
 -12   2   0  200.48    8.00
 -12   2   0  209.28    9.90
 -12  -2   0  198.38    8.20
 -12   2   0  200.28    9.10
 -12   2   0  201.08    8.00
 -12  -2   0  194.08    8.20
 -12   2   0  203.48    8.50
 -13  -2   0    0.30    0.40
 -13  -2   0    0.60    0.40
   0   3   0    0.70    2.30
  -1   3   0   -0.80    1.70
  -1   3   0    0.20    0.20
  -2  -3   0 6328.57  243.08
  -2   3   0 6289.07  237.48
  -3   3   0   -0.20    1.40
  -3  -3   0    2.00    3.50
  -3  -3   0    0.60    2.10
  -4   3   0 1717.43   72.09
  -4  -3   0 1720.43   72.19
   4  -3   0 1367.96   59.49
  -4  -3   0 1677.93   72.29
  -5  -3   0   -0.60    3.30
  -5  -3   0    6.30    4.50
  -5   3   0   -2.00    2.20
   5  -3   0    0.60    0.60
  -6  -3   0   -0.30    3.40
  -6   3   0    3.20    3.10
   6   3   0    5.30    2.40
   6  -3   0    3.90    1.10
  -6  -3   0   10.90    4.00
  -7  -3   0   -0.70    0.80
  -7   3   0    0.30    0.50
  -7  -3   0    1.10    1.10
  -7  -3   0    0.10    0.40
  -7   3   0   -0.80    0.40
  -7  -3   0    0.30    0.80
  -7   3   0    0.50    0.60
  -7   3   0    1.40    1.70
  -7  -3   0    1.10    0.50
  -7   3   0    1.60    2.30
   7   3   0   -0.40    1.00
  -8  -3   0   59.39    3.30
  -8   3   0   61.29   13.00
  -8  -3   0   63.09    3.80
  -8  -3   0   60.29    3.50
  -8   3   0   66.69    3.60
  -8   3   0   63.49    4.80
   8   3   0   59.69    7.20
  -8   3   0   66.09    3.30
  -8  -3   0   64.99    3.50
  -8  -3   0   60.99    4.00
  -8   3   0   67.29    4.00
  -8   3   0   66.29    5.90
  -8  -3   0   64.49    4.90
  -8   3   0   65.09    3.20
   9   3   0   -2.00    2.30
  -9  -3   0   -0.10    1.10
  -9   3   0   -0.60    0.50
  -9   3   0   -0.40    1.30
  -9  -3   0    0.60    0.70
  -9   3   0    1.30    1.80
  -9   3   0    8.20    7.00
  -9  -3   0    0.80    0.70
  -9   3   0    0.00    0.80
  -9   3   0   -0.20    0.50
  -9  -3   0    0.30    0.60
  -9  -3   0   -0.20    0.50
  -9   3   0    0.50    0.60
 -10  -3   0  351.96   14.30
 -10   3   0  339.37   15.50
 -10  -3   0  344.27   13.90
 -10   3   0  353.26   13.60
 -10   3   0  351.06   13.90
 -10   3   0  363.06   17.20
  10   3   0  295.07   19.30
 -10   3   0  361.96   13.70
 -10   3   0  356.16   14.60
 -10  -3   0  338.47   14.00
 -10  -3   0  350.06   14.10
 -11   3   0    0.60    1.40
 -11  -3   0    0.20    0.50
 -11   3   0    0.60    0.60
 -11   3   0   -0.10    0.50
 -11  -3   0    0.30    0.50
 -11  -3   0   -0.20    0.60
 -11   3   0   -0.20    0.60
 -11   3   0   -1.10    1.40
 -11   3   0   -0.30    0.50
 -12   3   0   37.00    3.40
 -12  -3   0   37.20    2.20
 -12   3   0   39.50    3.30
 -12  -3   0   38.10    2.20
 -12  -3   0   36.30    2.10
 -13  -3   0   -0.10    0.30
 -13  -3   0    0.10    0.30
   0   4   0  397.76   16.40
  -1   4   0    1.40    0.40
   1   4   0    0.80    0.60
  -2   4   0 5792.52  220.08
  -2  -4   0 5812.32  228.48
  -2   4   0 5801.82  213.18
  -3  -4   0    0.00    2.60
  -3  -4   0   10.80    7.50
  -4  -4   0  576.94   34.60
  -4  -4   0  592.54   36.80
  -4   4   0  578.24   33.60
  -5  -4   0    6.40    6.50
  -5  -4   0    5.70    4.10
  -5   4   0    5.00    3.40
  -6   4   0  213.58   19.50
  -6  -4   0  182.98   16.60
   7   4   0    0.50    1.80
  -7   4   0   -0.20    0.60
  -7   4   0    1.70    1.40
  -7  -4   0    1.20    0.50
  -7   4   0    0.20    1.20
  -7   4   0   -0.10    0.40
  -7   4   0    1.40    4.60
  -7   4   0   -0.40    0.50
  -7  -4   0    0.90    0.60
  -7   4   0    0.50    0.40
  -7  -4   0    1.50    0.60
  -7  -4   0    0.80    0.90
  -7  -4   0    0.50    0.40
  -8  -4   0  196.58    8.80
  -8   4   0  208.68   10.50
  -8   4   0  217.48    9.50
  -8   4   0  216.88   12.00
  -8   4   0  209.08    8.80
  -8   4   0  207.78    8.40
  -8  -4   0  196.48    8.70
  -8  -4   0  201.18    8.90
  -8   4   0  210.88    8.50
   8   4   0  217.58   15.00
  -8  -4   0  209.38    9.10
  -8   4   0  202.78   27.30
   9   4   0    2.40    2.50
  -9   4   0    0.70    0.50
  -9   4   0    0.20    0.50
  -9   4   0    0.50    0.50
  -9   4   0    0.10    1.80
  -9   4   0   -0.30    1.40
  -9  -4   0    0.00    0.60
  -9  -4   0    0.70    0.70
  -9   4   0   -1.00    0.60
  -9  -4   0    0.50    0.70
  -9  -4   0    0.20    0.60
  -9   4   0    0.70    8.20
 -10   4   0   31.90    2.10
 -10  -4   0   28.40    2.10
 -10   4   0   33.10    2.00
 -10   4   0   31.80    2.60
 -10  -4   0   31.40    2.30
 -10   4   0   31.70    4.10
 -10   4   0   28.20    3.60
 -10   4   0   32.40    2.00
 -10  -4   0   29.10    2.20
 -11   4   0   -0.10    0.50
 -11  -4   0    0.50    0.50
 -11  -4   0   -0.20    0.40
 -11   4   0    0.40    0.50
 -11  -4   0    0.60    0.60
 -11   4   0   -0.10    1.10
 -11   4   0   -0.80    1.30
 -12   4   0    6.10    1.50
 -12  -4   0    7.40    1.00
 -12   4   0   10.70    2.10
 -12  -4   0    8.10    1.10
 -13  -4   0   -0.20    0.20
 -13  -4   0    0.00    0.30
   0   5   0    0.50    0.50
  -1   5   0    0.10    0.40
   1  -5   0    6.60    5.00
  -1  -5   0   -0.30    4.30
   2   5   0 1913.21   75.09
   2  -5   0 1771.52   89.79
  -2  -5   0 1955.40   90.09
  -2   5   0 1987.20   80.39
  -2   5   0 2053.79   72.69
   3   5   0   -0.40    0.90
  -3   5   0    3.20    2.50
  -4   5   0  480.75   31.10
   4   5   0  476.55   23.20
  -4  -5   0  477.15   33.60
  -4  -5   0  525.85   37.30
  -5   5   0    3.40    3.00
   5   5   0    0.30    1.30
  -5  -5   0   -1.90    9.90
  -6   5   0    4.60    1.60
  -6  -5   0    1.50    0.60
  -6  -5   0    7.20    5.50
  -6   5   0   -2.50    4.80
  -6   5   0   -1.60    1.80
  -6  -5   0    4.40   10.60
   6   5   0    1.80    1.40
  -6  -5   0    0.50    0.40
  -7  -5   0   -0.10    0.50
  -7   5   0   -4.00    5.80
  -7   5   0    0.60    0.40
  -7   5   0    0.90    0.80
  -7   5   0    0.20    1.40
  -7  -5   0    0.60    0.50
  -7  -5   0   -3.20    7.30
  -7   5   0    1.10    0.40
  -7  -5   0    0.30    0.40
   7   5   0   -0.70    1.30
  -7  -5   0   -0.10    0.50
  -7   5   0    0.30    1.30
  -7  -5   0    0.90    6.00
  -8   5   0    8.40    1.00
  -8   5   0    7.90    1.40
   8   5   0    7.50    4.00
  -8  -5   0    8.30    1.20
  -8  -5   0    8.30    1.30
  -8   5   0    8.30    2.70
  -8   5   0   10.00    1.20
  -8   5   0    9.40    1.40
  -8   5   0    3.00    7.50
  -8   5   0    8.90    3.30
  -9  -5   0    0.20    0.50
   9   5   0    1.80    2.70
  -9   5   0    0.80    0.50
  -9   5   0    0.00    0.60
  -9   5   0   11.20   11.40
  -9  -5   0   -0.90    0.50
  -9   5   0   -0.20    1.50
  -9   5   0   -0.20    0.50
  -9  -5   0    0.70    0.50
  -9   5   0   -0.50    1.30
 -10  -5   0   31.40    2.50
 -10   5   0   29.10    1.90
 -10   5   0   30.60    4.00
 -10   5   0   20.00    4.20
 -10   5   0   26.70    2.20
 -10  -5   0   27.70    2.00
 -11   5   0    0.10    1.20
 -11  -5   0    0.20    0.50
 -11   5   0    0.10    0.50
 -11  -5   0    0.20    0.40
 -11   5   0    0.10    1.40
 -11  -5   0   -0.40    0.40
 -12   5   0   53.19    3.60
 -12   5   0   50.99    3.50
 -12  -5   0   51.59    2.70
 -12  -5   0   51.39    2.50
 -13  -5   0   -0.50    0.50
   0  -6   0  533.75   37.40
   0   6   0  567.14   22.90
  -1  -6   0   -1.30    3.20
   1  -6   0    4.50    6.10
   1   6   0    0.50    0.80
  -1   6   0    0.50    0.50
  -2   6   0  312.87   13.00
  -2  -6   0  335.17   28.40
   2   6   0  326.07   15.70
   2  -6   0  308.17   29.00
  -2   6   0  300.37   20.00
  -3   6   0   -0.60    2.40
  -3  -6   0    9.90    6.20
  -4  -6   0  649.64   43.30
   4   6   0  625.94   29.30
  -4   6   0  650.53   39.60
  -5  -6   0   -1.10    4.50
   5   6   0   -1.00    1.00
  -5   6   0    5.70    5.00
  -5   6   0   -2.10    1.00
  -6  -6   0    6.90    1.10
  -6   6   0    6.50    1.80
  -6  -6   0    6.70    6.50
   6   6   0    7.70    2.90
  -6  -6   0    6.80    1.00
  -6   6   0    6.70    5.80
  -7   6   0    1.40    1.60
  -7  -6   0  -24.90   14.60
  -7  -6   0    2.50    7.60
  -7   6   0    0.00    0.50
   7   6   0    1.40    2.00
  -7   6   0    0.60    1.60
  -7  -6   0    0.00    0.50
  -7  -6   0    0.20    0.40
  -7   6   0  -13.80    7.40
  -7   6   0    0.40    0.80
  -8  -6   0   35.20    2.50
  -8  -6   0   33.70    2.20
  -8   6   0   27.30   12.10
  -8   6   0   34.30    2.70
  -8   6   0   37.10    2.20
   8   6   0   36.00    6.50
  -8   6   0   40.20    4.90
  -8   6   0   38.60    4.30
  -8  -6   0   33.00    2.30
  -9   6   0   -0.20    1.40
  -9   6   0   -0.20    0.40
   9   6   0   -2.80    3.30
  -9  -6   0    0.30    0.60
  -9   6   0    0.40    1.60
  -9   6   0    0.80    0.60
  -9  -6   0    0.10    0.60
  -9  -6   0    0.50    0.50
 -10   6   0   94.89    4.60
 -10   6   0   91.39    6.60
 -10  -6   0   91.29    4.30
 -10   6   0   88.19    6.20
 -10  -6   0   87.29    4.10
 -10  -6   0   90.39    4.60
 -11   6   0   -0.10    1.40
 -11   6   0   -0.10    1.00
 -11  -6   0    0.90    0.50
 -11  -6   0    0.30    0.50
 -12  -6   0    0.50    0.40
 -12  -6   0    0.50    0.40
 -12   6   0    0.50    0.70
 -12   6   0    1.70    1.10
   0  -7   0   -1.00    7.50
   1   7   0    1.60    1.10
   1  -7   0    2.10   11.40
  -1   7   0    1.20    0.60
  -1  -7   0    0.60    6.80
  -2   7   0    1.90    1.20
   2   7   0    1.80    1.20
  -2  -7   0   13.40    7.00
  -2   7   0    3.40    2.20
  -3  -7   0   -6.20    4.30
   3   7   0    0.50    1.30
  -3   7   0    0.90    2.40
   4   7   0   81.69    7.20
  -4  -7   0   78.39   18.50
  -4   7   0   67.59    4.80
   5   7   0    1.60    1.50
  -5   7   0    0.50    4.90
  -5  -7   0    0.20    0.50
  -5   7   0   -1.50    1.10
   5   7   0   -0.20    0.20
  -5   7   0    0.50    1.70
  -6  -7   0  314.87   30.50
   6   7   0  283.97   11.30
   6   7   0  312.87   18.40
  -6   7   0  289.47   13.90
  -6  -7   0  302.97   12.20
  -6  -7   0  271.67   11.80
  -6   7   0  324.77   15.70
  -6   7   0  319.57   31.20
  -7   7   0   -1.70    1.50
  -7  -7   0    1.20    0.70
  -7   7   0   18.60   10.50
   7   7   0   -0.70    1.90
  -7  -7   0    9.30    8.80
  -7   7   0    1.10    1.80
  -8   7   0    8.60    2.70
  -8  -7   0    7.40    1.00
  -8   7   0    4.70    1.10
  -8  -7   0    6.50    1.30
   8   7   0    4.20    3.10
  -8  -7   0   10.00    1.20
  -8   7   0   -2.70   13.10
   8   7   0    7.40    0.60
  -8   7   0    8.40    2.50
   9   7   0    0.20    0.30
  -9   7   0   -1.50    2.10
  -9   7   0    0.80    0.50
  -9   7   0    0.30    1.60
  -9  -7   0    0.60    0.40
  -9  -7   0    0.10    0.50
 -10   7   0   10.10    2.10
 -10  -7   0    9.20    1.10
 -10  -7   0    9.80    1.30
 -10   7   0   11.50    2.60
 -11  -7   0    0.30    0.50
 -11   7   0    0.00    0.90
 -11  -7   0    0.40    0.40
 -12  -7   0   39.30    2.00
 -12  -7   0   37.80    1.70
 -12   7   0   40.20    2.70
   0   8   0  449.56   19.60
   0  -8   0  476.95   39.30
  -1  -8   0   -2.50    6.40
  -1   8   0    1.10    1.70
   1   8   0    0.90    1.10
   2   8   0   92.59    7.20
  -2  -8   0  119.89   16.50
   3   8   0    2.40    1.50
  -3  -8   0    2.20    7.00
  -3   8   0    4.60    4.30
   4  -8   0  321.87   13.90
   4   8   0  404.46   20.20
  -4   8   0  420.16   18.70
  -4   8   0  379.46   32.00
  -4   8   0  353.86   16.30
   4   8   0  365.76   13.90
  -4  -8   0  370.66   37.50
  -5  -8   0   -0.20    0.50
   5   8   0   -0.60    1.60
  -5   8   0    1.50    1.80
   5   8   0    0.50    0.30
  -5   8   0    0.80    1.40
  -5  -8   0    1.20    0.70
  -5   8   0   -1.10    5.70
  -5  -8   0   -9.50    5.90
   6   8   0  127.19   15.50
  -6   8   0  139.09   24.60
  -6  -8   0  165.98   42.70
  -6   8   0  186.68   10.80
   6  -8   0  170.38    6.70
  -6  -8   0  160.38    7.00
   6   8   0  174.28    6.50
  -7  -8   0   -0.80    0.50
  -7   8   0   -1.80    1.50
  -7  -8   0   -1.00    0.60
   7   8   0    3.00    2.40
  -7   8   0   -4.60   11.20
  -7   8   0   -0.40    1.70
   7   8   0    0.40    0.30
  -8   8   0  243.78   12.90
  -8  -8   0  217.58    9.20
  -8  -8   0  228.18    9.60
   8   8   0  229.68   16.20
  -8   8   0  202.18   33.10
   8   8   0  217.38    8.60
  -8   8   0  216.78   11.50
  -9  -8   0    0.40    0.40
  -9   8   0    0.40    1.50
  -9  -8   0    0.50    0.60
  -9   8   0   -0.50    1.40
 -10   8   0    7.90    2.20
 -10  -8   0    8.90    1.40
 -10   8   0    7.60    2.10
 -10  -8   0    9.20    1.20
 -11  -8   0    0.50    0.40
 -11   8   0    0.90    1.20
 -11   8   0    0.20    0.80
 -12   8   0    2.40    0.90
 -12  -8   0    2.40    0.40
   0  -9   0   -2.10    8.30
   0   9   0    0.50    1.00
   0   9   0    0.30    0.30
  -1   9   0    0.40    0.20
   1  -9   0    0.00    0.20
  -1   9   0    0.30    1.30
  -1   9   0    0.60    2.60
   1   9   0    1.90    1.50
  -1  -9   0   -0.10    0.20
   1   9   0    0.40    0.20
   1  -9   0    3.40   20.10
  -1  -9   0   -6.50    8.70
  -2   9   0   99.79   13.70
  -2  -9   0  100.09    3.90
  -2   9   0   93.29    3.80
  -2  -9   0   91.49   23.20
   2  -9   0   90.09    3.90
   2   9   0  105.09    7.70
   2   9   0   98.49    3.90
  -3   9   0    8.30    4.90
   3   9   0    2.20    1.70
   3  -9   0    0.00    0.20
  -3  -9   0   -6.00   10.20
  -4   9   0 1027.10   43.10
   4  -9   0 1013.90   40.50
  -4   9   0 1107.39   68.29
  -4   9   0 1232.68   45.90
   4   9   0 1139.89   47.60
   4   9   0 1081.19   40.50
  -4  -9   0 1047.20   40.40
  -4  -9   0 1180.78   74.79
  -5   9   0    0.20    2.00
  -5  -9   0   -6.60    9.50
  -5   9   0   19.30    9.90
  -5   9   0   -0.30    1.70
  -5  -9   0    1.40    0.80
   6   9   0    8.60    0.80
   6  -9   0    7.80    0.70
   6   9   0    7.70    2.80
  -6  -9   0   11.40    1.60
  -6   9   0    9.80    2.80
  -6   9   0   15.70   11.60
  -6  -9   0   15.10   11.30
  -7  -9   0    4.40   13.70
  -7   9   0   -1.10    1.50
  -7   9   0    0.60    1.50
   7  -9   0    0.00    0.30
   7   9   0   -0.40    0.30
  -7  -9   0    0.10    0.70
   7   9   0   -0.60    3.60
  -7  -9   0    0.10    0.50
  -8   9   0    1.90    1.70
  -8  -9   0    5.90    0.90
  -8  -9   0    6.40    1.10
  -8   9   0    3.50    1.90
   8   9   0    5.30    0.60
  -9   9   0   -1.40    1.10
  -9   9   0    2.50    1.60
  -9  -9   0   -0.30    0.50
   9   9   0    0.10    0.20
  -9  -9   0   -1.20    0.60
 -10   9   0    5.90    1.50
 -10   9   0    6.50    2.80
 -11   9   0   -0.20    0.90
 -11  -9   0   -0.10    0.30
   0 -10   0  337.27   39.90
   0 -10   0  334.07   12.30
   0  10   0  304.57   14.90
   0  10   0  336.37   12.30
   1  10   0    0.10    0.20
  -1 -10   0    0.20    0.20
  -1  10   0    0.10    0.20
   1  10   0    0.70    1.40
   1 -10   0    0.90    0.30
  -1 -10   0   -6.00   16.40
  -1  10   0    4.40    3.80
   2  10   0   74.89    3.10
   2 -10   0   72.79    3.20
  -2  10   0   76.59   12.80
  -2 -10   0   78.19    3.10
   2  10   0   75.59    6.50
  -2 -10   0   92.29   25.00
  -2  10   0   74.29    3.00
   3  10   0    0.40    0.30
  -3  10   0   -1.00    1.80
   3 -10   0    0.00    0.20
  -3  10   0    3.00    5.70
  -3 -10   0    0.30    0.20
  -3 -10   0   -3.70   13.40
   3  10   0    0.40    1.70
  -4 -10   0   -7.50   10.30
  -4  10   0   -1.10    5.70
  -4  10   0    1.40    1.70
  -4  10   0    4.80    2.30
   4  10   0    4.60    2.50
   5  10   0   -2.30    2.10
   5 -10   0    0.40    0.30
  -5  10   0    1.00    1.60
  -5  10   0   -2.80   11.50
  -5 -10   0   -0.90    0.60
  -5  10   0    0.20    1.90
   5  10   0    0.20    0.30
  -6  10   0  313.37   15.80
   6 -10   0  292.07   11.50
  -6 -10   0  253.87   35.30
  -6 -10   0  321.57   12.50
   6  10   0  307.87   11.50
  -6  10   0  297.77   14.60
  -7 -10   0    0.30    0.60
  -7  10   0    0.10    1.40
   7  10   0    0.00    0.30
  -8  10   0    3.60    1.80
  -8 -10   0    4.60    1.00
  -8  10   0    7.40    2.00
   8  10   0    5.30    0.60
  -9  10   0   -0.50    1.40
  -9  10   0   -1.00    1.30
   9  10   0    0.10    0.20
  -9 -10   0    0.10    0.50
 -10  10   0   18.00    2.50
 -10 -10   0   26.50    1.50
   0  11   0    6.40    5.50
  -1 -11   0  -27.90   18.40
   1 -11   0    0.10    0.30
   1  11   0   -0.20    0.30
   1  11   0    2.50    2.50
  -1 -11   0    0.20    0.30
  -1  11   0   -1.10    3.30
  -2  11   0   84.39   15.60
   2  11   0   81.79    3.40
  -2 -11   0   72.89   25.90
   2  11   0   79.99   10.80
  -2 -11   0   82.69    3.30
   2 -11   0   79.09    3.40
  -3 -11   0  -18.60   15.50
   3 -11   0    0.00    0.30
  -3  11   0   -5.60    6.00
  -3  11   0    0.70    2.00
  -3 -11   0   -0.10    0.20
   3  11   0   -0.10    0.30
  -4 -11   0  485.25   17.80
  -4  11   0  475.55   20.80
   4  11   0  464.55   23.80
  -4  11   0  504.35   22.60
   4 -11   0  472.05   17.90
  -4 -11   0  530.55   51.29
   4  11   0  474.35   17.90
  -4  11   0  435.26   41.80
  -5 -11   0   -0.40    0.50
   5 -11   0    0.00    0.30
  -5 -11   0  -13.60   17.70
  -5  11   0   -0.50    1.40
   5  11   0   -0.20    0.30
  -5  11   0   -2.60    1.30
  -5  11   0    0.40   17.10
   5  11   0    2.40    2.80
  -6  11   0   67.49    5.80
  -6 -11   0   78.19    3.90
   6  11   0   78.29    3.20
  -6 -11   0  117.59   32.60
   6 -11   0   71.79    3.10
  -6  11   0   71.79    5.70
  -7  11   0    2.40    1.70
  -7  11   0    1.40    1.40
   8  11   0    1.20    0.30
  -8  11   0    2.00    1.90
  -8 -11   0    1.40    0.60
  -8  11   0    1.90    1.50
  -9  11   0    1.10    1.20
  -9 -11   0   -0.20    0.50
 -10  11   0   -0.10    1.40
 -10 -11   0    0.00    0.30
   0  12   0   42.90    1.90
   0  12   0   27.40    7.20
   0 -12   0   42.90    2.00
   1  12   0    0.00    0.30
  -1  12   0    0.00    0.20
   1  12   0    6.10    4.90
   1 -12   0    0.00    0.30
  -1 -12   0   -0.20    0.20
  -1  12   0   -8.50    6.10
  -2  12   0    8.60    0.50
  -2 -12   0  -22.80   24.60
  -2  12   0   18.10    9.90
   3 -12   0    0.20    0.30
   3  12   0    0.00    0.30
  -3 -12   0    2.10   24.80
   3  12   0   -4.60    4.00
  -3  12   0  -14.60    9.70
  -3 -12   0    0.20    0.20
  -3  12   0    1.50    1.80
   4  12   0   12.50    0.90
  -4  12   0   11.20    2.90
   4 -12   0   13.90    1.00
  -4 -12   0   37.90   46.10
  -4  12   0   15.20    3.00
  -4 -12   0   14.40    0.80
  -4 -12   0   14.40    1.90
  -5  12   0   -0.70    1.30
   5 -12   0    0.20    0.30
   5  12   0    0.20    0.30
  -5 -12   0    1.10    0.60
   6 -12   0   12.50    0.80
  -6  12   0    9.10    2.10
  -6 -12   0   13.40    1.30
   6  12   0   13.00    0.90
  -7 -12   0   -0.10    0.40
   7  12   0    0.00    0.20
  -7  12   0   -0.70    1.10
   7 -12   0    0.50    0.20
   8  12   0   66.19    2.60
  -8 -12   0   66.89    3.10
  -8  12   0   56.59    4.20
  -9  12   0    0.30    0.90
  -9 -12   0   -0.10    0.30
   0 -13   0    0.10    0.30
  -1 -13   0    0.40    0.30
  -1  13   0    0.00    0.20
   1 -13   0   -0.30    0.40
  -2 -13   0   60.69    2.50
   2  13   0   58.69    2.50
   2 -13   0   59.89    2.50
  -2  13   0   51.69    5.20
  -3 -13   0    0.40    0.20
   3 -13   0    0.20    0.30
  -3 -13   0   -0.40    0.40
   3  13   0   -0.20    0.20
  -3  13   0    0.10    1.30
   4 -13   0   85.49    3.40
  -4  13   0   82.99    5.80
  -4 -13   0   83.29    4.00
   4  13   0   82.59    3.40
   5  13   0    0.00    0.20
  -5  13   0    0.60    1.60
  -5 -13   0    1.00    0.60
   5 -13   0    0.10    0.20
  -6  13   0    1.80    1.40
  -6 -13   0    4.20    0.80
   6  13   0    4.00    0.50
   6 -13   0    5.40    0.50
  -7 -13   0    0.50    0.40
  -7  13   0    0.70    1.10
   7  13   0    0.30    0.20
   7 -13   0    0.10    0.20
  -8 -13   0    3.80    0.60
   8  13   0    5.00    0.40
  -8  13   0    4.30    1.20
   0  14   0   69.89    2.80
   0 -14   0   69.99    2.90
   1  14   0    0.30    0.20
  -1  14   0   -1.20    1.60
  -1 -14   0   -0.20    0.20
   1 -14   0    0.00    0.20
   2  14   0   35.60    1.60
  -2 -14   0   36.50    1.60
  -2  14   0   38.30    3.80
   2 -14   0   35.80    1.70
   3  14   0    0.20    0.30
   3 -14   0    0.30    0.20
  -3 -14   0    0.20    0.50
  -3  14   0    0.90    1.40
  -4  14   0    9.50    2.10
   4 -14   0    9.10    0.60
   4  14   0    8.40    0.60
  -4 -14   0    8.00    1.00
  -5 -14   0    0.00    0.40
   5 -14   0    0.30    0.20
   6  14   0    4.00    0.40
  -6 -14   0    2.50    0.60
  -6  14   0    1.80    1.30
   6 -14   0    4.00    0.30
  -7  14   0    0.20    0.90
   7 -14   0   -0.20    0.20
   7  14   0    0.00    0.10
   0 -15   0    0.30    0.20
  -1 -15   0   -0.30    0.30
  -1  15   0   -0.20    1.00
   1 -15   0    0.20    0.20
  -1 -15   0    0.30    0.30
  -2  15   0   23.90    3.40
  -2 -15   0   20.80    0.90
   2 -15   0   21.70    1.10
   2  15   0   20.60    1.00
   3 -15   0   -0.10    0.20
  -3  15   0   -0.40    1.00
   3  15   0    0.20    0.20
   4  15   0   42.40    1.70
  -4 -15   0   39.10    1.90
   4 -15   0   43.30    1.80
  -4  15   0   42.40    3.30
   5  15   0   -0.10    0.20
   5 -15   0   -0.30    0.10
  -5  15   0   -1.00    1.00
   0 -16   0   26.00    1.10
   0  16   0   30.00    2.60
   1 -16   0    0.10    0.20
  -1 -16   0    0.00    0.10
   1  16   0    0.50    0.90
  -1  16   0   -0.70    0.80
  -2  16   0   17.70    2.60
   2 -16   0   17.10    0.90
  -3  16   0    0.60    0.80
   0   0  -1    0.70    0.70
   0   0   1    0.80    0.20
   0   0   1    0.20    0.20
  -1   0  -1    0.30    0.40
  -1   0   1    0.30    0.50
  -1   0  -1   -0.30    0.80
   1   0   1    0.20    0.20
   1   0   1    0.90    0.80
  -1   0   1   -0.10    0.70
  -1   0  -1    0.20    0.20
  -2   0   1    0.50    0.70
  -2   0   1    0.60    1.20
  -2   0  -1    0.90    0.90
  -2   0  -1    1.50    1.20
  -3   0  -1   -0.90    0.90
  -3   0   1    0.20    1.40
  -3   0  -1   -0.50    1.10
  -4   0  -1    0.90    1.20
  -4   0   1    1.40    1.70
  -5   0  -1    1.70    1.60
   5   0   1    0.20    0.80
  -5   0   1    0.80    1.70
  -6   0  -1   -0.30    1.60
   6   0   1    0.60    1.10
  -6   0   1   -2.60    2.00
  -7   0   1   -0.30    0.30
  -7   0   1    0.20    1.10
  -7   0   1   -0.70    0.40
  -7   0  -1   -0.40    0.40
  -7   0   1    0.00    0.50
  -7   0   1    0.30    1.00
   7   0   1   -0.80    1.10
  -7   0  -1   -2.40    1.80
  -7   0  -1    0.10    0.90
  -7   0  -1   -0.20    0.40
  -7   0  -1    0.60    0.40
  -7   0   1    0.70    2.30
  -7   0  -1   -0.10    0.50
  -7   0   1    0.30    0.60
  -8   0  -1    0.70    0.70
  -8   0   1    1.00    0.50
  -8   0  -1   -0.10    0.40
  -8   0   1    0.50    0.60
  -8   0  -1    1.40    1.20
  -8   0   1    0.70    1.30
  -8   0   1    0.30    0.50
  -8   0  -1    0.20    1.00
  -8   0   1    1.40    2.80
   8   0  -1    3.50    2.10
  -8   0  -1    0.60    0.60
  -8   0   1    0.90    0.50
  -8   0   1   -0.40    1.10
  -9   0   1   -0.40    0.70
  -9   0  -1   -0.10    0.50
  -9   0  -1   -0.40    1.10
   9   0   1    1.20    3.60
  -9   0   1    0.50    1.40
  -9   0   1    0.20    0.60
  -9   0  -1   -0.30    0.70
  -9   0   1   -0.60    0.50
  -9   0  -1   -0.10    0.60
  -9   0   1    0.30    0.60
  -9   0  -1   -0.50    0.50
  -9   0   1    0.30    1.50
 -10   0   1    0.50    0.90
 -10   0  -1    0.00    0.60
 -10   0  -1    0.50    0.80
 -10   0   1    0.60    0.70
 -10   0   1   -0.10    1.60
 -10   0   1    0.80    0.60
 -10   0   1    1.00    0.60
 -10   0  -1    0.80    0.60
 -10   0  -1    0.70    0.60
 -10   0  -1   -0.20    1.30
 -10   0  -1   -0.60    1.40
 -10   0   1    0.40    1.40
 -11   0  -1   -0.40    1.30
 -11   0  -1    0.00    1.00
 -11   0  -1    0.20    0.50
 -11   0   1    0.30    0.80
 -11   0   1    0.50    1.30
 -11   0  -1    1.00    0.80
 -11   0   1    0.00    1.40
 -11   0  -1    0.20    0.60
 -11   0   1    0.00    0.50
 -11   0   1   -0.20    0.50
 -11   0   1    0.70    0.70
 -11   0  -1   -0.30    0.40
 -12   0   1    0.20    0.50
 -12   0  -1   -0.30    0.40
 -12   0  -1    0.10    0.50
 -12   0   1    0.10    0.50
 -12   0   1    0.20    0.60
 -12   0   1   -0.20    0.40
 -13   0   1    0.20    0.40
 -13   0   1    0.30    0.40
 -13   0  -1   -0.20    0.30
   0  -1  -1    0.60    1.00
   0   1   1    0.40    0.20
   0  -1  -1    0.20    0.20
   0   1  -1    0.00    1.00
   1   1  -1  911.91   38.50
  -1   1   1  907.91   37.20
   1  -1   1  898.11   33.90
  -1   1   1  946.31   37.90
  -1   1   1  922.01   34.90
  -1  -1  -1  962.00   38.60
  -1   1  -1  915.11   37.50
  -1  -1   1  919.61   38.30
  -1   1  -1  942.51   35.60
  -1   1  -1  905.61   34.00
  -1  -1   1  989.90   36.00
   1   1   1  919.11   35.00
   1  -1  -1  859.51   34.50
  -2  -1  -1  800.62   38.60
  -2   1   1  903.51   37.90
   2  -1   1  864.41   32.60
  -2   1  -1  876.71   36.10
  -2  -1   1  874.11   36.50
  -2  -1   1  889.91   35.60
  -3  -1  -1    2.50    2.20
  -3   1   1    1.50    1.70
  -3  -1  -1    1.60    1.20
  -3  -1  -1    0.90    1.60
  -3   1  -1    1.00    1.60
  -3  -1   1    0.80    1.60
  -3  -1   1    1.50    1.80
  -3   1  -1    0.50    1.00
  -4  -1  -1  176.28   10.60
  -4  -1  -1  189.38   10.90
  -4  -1  -1  182.78   11.20
   4  -1   1  183.18    8.90
  -4   1   1  191.78   14.50
  -4   1  -1  183.48   12.60
  -4  -1   1  186.88   15.70
  -4  -1   1  190.98    9.60
  -4  -1   1  187.18   10.00
  -5   1   1    3.80    2.70
   5  -1   1    1.80    0.80
  -5  -1   1    0.60    1.90
   5   1   1    2.30    1.20
  -5   1  -1   -1.20    1.70
  -6   1   1    7.50    3.40
  -6   1  -1    6.20    2.90
  -6  -1   1    4.70    2.50
  -7  -1  -1  213.18   10.50
  -7   1   1  183.18   16.80
  -7  -1  -1  193.88    8.80
  -7   1   1  192.78    8.20
  -7   1   1  199.08    8.30
   7  -1   1  201.78   10.90
  -7   1   1  215.18   11.10
  -7  -1  -1  190.28    8.40
  -7  -1  -1  198.28    8.30
  -7   1   1  206.48    9.60
  -7   1   1  216.38    9.10
  -7  -1  -1  184.58    8.20
  -7   1   1  204.98    8.60
  -7  -1   1  193.68    8.90
  -7  -1   1  186.58    9.20
  -7  -1   1  191.48    8.30
  -7  -1   1  213.08   10.70
  -7   1  -1  211.08   15.70
  -7   1  -1  200.38    8.90
   7   1   1  208.48   12.40
  -7  -1   1  185.48    8.50
  -7   1  -1  200.28    8.50
  -7   1  -1  196.48    8.20
  -7  -1   1  199.38    8.30
  -7   1  -1  197.58    8.20
  -8  -1  -1   68.59    3.70
  -8  -1  -1   64.69    3.40
  -8   1   1   64.69    9.80
  -8  -1  -1   65.19    3.50
  -8  -1  -1   68.29    4.40
  -8   1   1   64.79    3.70
  -8   1   1   66.99    5.80
   8  -1   1   58.19    5.50
  -8   1   1   65.69    4.70
  -8   1   1   67.69    3.40
  -8  -1  -1   69.29    5.30
  -8   1   1   66.69    4.10
  -8  -1  -1   67.19    3.90
   8   1  -1   65.49    6.90
  -8   1   1   63.99    3.40
  -8   1  -1   69.19    3.40
  -8  -1   1   66.29    3.50
  -8   1  -1   62.59    3.30
   8   1   1   71.79    6.60
  -8   1  -1   66.29    4.60
  -8  -1   1   63.49    3.50
  -8  -1   1   71.19    5.60
  -8   1  -1   67.69    4.00
  -8  -1   1   65.89    4.10
  -8  -1   1   63.99    3.70
  -8  -1   1   66.69    4.50
  -8   1  -1   61.89    3.60
  -8   1  -1   70.29    5.60
  -8   1  -1   63.89    8.90
   8  -1  -1   74.49    6.70
  -9   1   1    4.40    1.20
  -9   1   1    4.90    1.00
  -9  -1  -1    6.10    1.10
  -9   1   1    4.10    0.90
  -9   1   1    4.00    1.70
  -9   1   1    4.50    1.10
  -9  -1  -1    3.40    0.90
  -9  -1  -1    5.60    1.20
  -9   1   1    4.40    2.10
  -9  -1  -1    5.40    2.00
   9   1  -1    7.90    3.20
  -9  -1  -1    4.70    0.90
  -9  -1  -1    7.40    2.70
  -9  -1   1    8.90    2.10
  -9   1  -1    4.00    1.00
  -9  -1   1    4.60    1.10
  -9   1  -1    3.30    1.70
   9   1   1    6.00    2.80
  -9  -1   1    5.00    1.10
  -9   1  -1    3.90    0.80
  -9   1  -1    4.40    1.10
  -9   1  -1    7.90    2.80
  -9  -1   1    6.00    1.10
  -9   1  -1    4.40    0.90
  -9  -1   1    5.00    2.00
  -9  -1   1    4.70    1.20
 -10  -1  -1  109.49    5.30
 -10  -1  -1  114.89    5.80
 -10   1   1  108.09    5.90
 -10   1   1  110.39    5.20
 -10   1   1  114.99    5.50
 -10  -1  -1  106.19    6.10
 -10  -1  -1  113.29    7.20
 -10  -1  -1  106.89    5.20
 -10   1   1  111.99    6.70
 -10   1   1  112.49    7.90
 -10  -1  -1  110.39    5.40
 -10   1   1  113.69    5.20
 -10   1  -1  110.39    5.40
 -10  -1   1  117.99    7.60
 -10   1  -1  103.19    6.40
 -10   1  -1  116.59    7.60
 -10   1  -1  116.39    5.80
 -10  -1   1  108.89    5.30
 -10   1  -1  114.89    5.20
 -10  -1   1  112.89    6.40
 -10  -1   1  111.29    5.30
 -10  -1   1  112.89    5.90
 -10  -1   1  106.59    5.50
 -10   1  -1  105.79    5.10
 -11  -1  -1    0.30    0.70
 -11   1   1    0.10    0.50
 -11  -1  -1    0.10    0.50
 -11  -1  -1    0.50    0.60
 -11   1   1    1.40    1.50
 -11  -1  -1    0.00    0.60
 -11   1   1    0.80    0.60
 -11   1   1   -0.50    0.60
 -11   1   1    0.00    1.50
 -11   1   1    0.80    0.70
 -11  -1   1    0.00    0.50
 -11   1  -1   -0.20    0.60
 -11   1  -1   -0.10    0.50
 -11  -1   1    0.80    1.20
 -11   1  -1    0.20    0.70
 -11  -1   1    1.20    0.80
 -11  -1   1    0.90    0.60
 -11   1  -1   -0.20    0.50
 -11  -1   1    0.80    1.50
 -11   1  -1    0.20    1.30
 -11  -1   1    1.10    0.60
 -11   1  -1    0.20    1.20
 -12  -1  -1   12.20    1.20
 -12   1   1   10.40    1.20
 -12   1   1   10.20    2.20
 -12   1   1   11.00    1.10
 -12   1   1    7.50    1.60
 -12   1   1   12.40    1.50
 -12   1   1   10.70    1.20
 -12  -1  -1   10.70    1.20
 -12  -1   1    9.50    1.20
 -12   1  -1   11.10    1.10
 -12   1  -1    9.40    1.10
 -12  -1   1   11.10    1.20
 -12  -1   1   11.30    1.30
 -13  -1  -1    1.50    0.50
 -13  -1   1    1.00    0.40
 -13  -1   1    1.20    0.40
   0   2   1 1749.72   65.59
   0   2  -1 1829.72   71.99
   0  -2  -1 1726.13   72.19
  -1  -2  -1   45.70    5.80
  -1   2   1   52.39    4.50
  -1   2   1   50.39    2.50
  -1   2  -1   48.50    5.40
   1   2   1   49.10    3.10
   1  -2  -1   46.10    5.50
   1  -2  -1   48.40    2.60
  -2  -2  -1 1428.16   58.69
  -2   2   1 1360.56   56.69
  -2  -2  -1 1400.96   59.59
   2   2   1 1305.07   52.49
  -2   2  -1 1407.76   55.09
  -2   2  -1 1388.06   56.29
  -2  -2   1 1306.27   60.89
  -3  -2  -1 1330.17   57.99
   3  -2   1 1315.67   49.80
  -3  -2  -1 1435.86   58.09
  -3   2   1 1369.36   58.59
  -3   2  -1 1365.96   54.59
  -3   2  -1 1353.16   56.79
  -3  -2   1 1320.27   57.39
   3   2   1 1245.78   51.99
  -4  -2  -1  697.53   34.90
   4  -2   1  694.03   27.50
  -4   2   1  739.93   37.20
  -4  -2  -1  725.73   34.50
   4   2   1  659.93   29.70
  -4   2  -1  734.43   35.30
  -4  -2   1  736.03   33.90
  -4  -2   1  723.53   34.30
  -5  -2  -1  118.59   10.00
  -5   2   1  125.79   12.80
  -5  -2  -1  124.69   10.30
   5  -2   1  119.89    6.30
  -5  -2   1  129.59    9.20
   5   2   1  120.49    8.30
  -5  -2   1  127.29    9.80
  -5   2  -1  129.69   11.90
  -6   2   1  742.03   41.30
   6  -2   1  731.73   30.10
   6   2   1  790.62   33.80
  -6   2  -1  771.62   39.10
   7   2  -1    0.20    1.80
  -7   2   1    0.30    0.40
  -7  -2  -1    1.60    0.50
  -7   2   1   -2.30    1.00
  -7  -2  -1    1.40    0.70
  -7   2   1    1.60    0.50
   7  -2   1    1.10    1.20
  -7  -2  -1    2.70    1.00
  -7   2   1    0.90    0.80
  -7  -2  -1    1.40    1.00
  -7  -2  -1    0.70    0.50
  -7   2   1    0.80    1.30
  -7  -2  -1    0.40    0.50
  -7   2   1    1.40    0.60
  -7   2  -1    1.70    0.50
  -7   2  -1    1.80    2.60
  -7  -2   1    1.30    0.60
  -7  -2   1    0.70    0.50
  -7   2  -1    0.60    0.50
  -7   2  -1    1.40    0.40
  -7  -2   1    0.70    1.00
  -7  -2   1    2.00    0.70
  -7   2  -1    1.20    1.30
  -7  -2   1   -0.20    0.50
  -7   2  -1    0.30    1.10
   7   2   1    1.60    1.50
  -7   2  -1    0.10    0.60
  -7  -2   1   -0.80    0.90
  -8   2   1  187.48   10.90
  -8   2   1  165.28   17.20
  -8   2   1  177.58    8.00
   8   2  -1  180.68   13.30
  -8   2   1  182.48    8.60
  -8  -2  -1  179.98    7.90
  -8  -2  -1  193.18    9.80
  -8   2   1  166.08    9.10
  -8  -2  -1  179.48    7.80
  -8  -2  -1  171.68    8.40
  -8   2   1  182.98    7.70
  -8  -2  -1  178.98    7.80
  -8   2   1  184.88    7.70
  -8  -2  -1  183.08    8.30
  -8  -2   1  181.58    8.40
  -8  -2   1  183.08    7.90
  -8  -2   1  181.18    8.70
  -8   2  -1  182.28    7.60
  -8   2  -1  186.08   10.50
  -8  -2   1  196.48   10.20
  -8   2  -1  184.68    7.90
  -8   2  -1  184.48    7.60
  -8   2  -1  188.88    9.30
  -8  -2   1  177.98    8.00
  -8  -2   1  173.88    7.80
  -8   2  -1  184.88    8.40
  -8   2  -1  171.28   15.70
   8   2   1  196.48   12.70
  -9   2   1    2.90    1.70
  -9  -2  -1    4.30    0.90
  -9   2   1    3.10    2.00
  -9  -2  -1    3.30    0.90
  -9   2   1    2.00    0.70
  -9  -2  -1    2.70    1.00
  -9   2   1    3.60    1.20
   9   2  -1   -1.10    3.20
  -9  -2  -1    1.80    1.40
  -9   2   1    7.80   11.20
  -9  -2  -1    4.60    1.70
  -9  -2  -1    4.40    0.90
  -9   2   1    3.10    0.70
  -9   2   1    2.80    0.80
  -9  -2   1    4.00    1.60
  -9  -2   1    2.40    0.80
  -9   2  -1    4.20    1.90
  -9   2  -1    2.30    0.70
  -9   2  -1    3.20    0.80
  -9  -2   1    3.90    1.00
  -9  -2   1    3.30    0.80
  -9  -2   1    2.90    1.60
  -9   2  -1    0.90    1.70
  -9   2  -1    3.00    0.90
   9   2   1    2.70    2.50
  -9   2  -1    2.30    0.90
  -9  -2   1    1.30    1.00
 -10   2   1  172.88    7.80
 -10   2   1  183.88    9.40
 -10  -2  -1  175.48    7.80
 -10  -2  -1  178.68    8.10
 -10  -2  -1  177.48    7.70
 -10  -2  -1  176.18    7.80
 -10   2   1  180.38    7.60
 -10   2   1  176.38   10.60
 -10   2   1  180.68    8.50
 -10   2   1  184.98    7.60
  10   2  -1  154.08   13.70
 -10  -2   1  174.18    7.80
 -10   2  -1  170.68    7.70
 -10   2  -1  182.48    8.30
 -10   2  -1  184.18    7.60
 -10   2  -1  178.48   10.20
 -10  -2   1  192.68   10.10
 -10  -2   1  165.18    7.80
 -10  -2   1  174.28    7.70
 -10   2  -1  174.98    9.10
 -10   2  -1  180.88    7.60
 -10  -2   1  177.38    8.60
 -10  -2   1  179.88    8.30
 -11   2   1    7.60    1.20
 -11   2   1    8.40    1.50
 -11  -2  -1    6.90    1.10
 -11   2   1    7.80    1.10
 -11  -2  -1    5.30    0.90
 -11   2   1    6.60    2.00
 -11   2   1    6.50    2.10
 -11   2   1    9.50    1.20
 -11  -2  -1    7.30    1.10
 -11   2  -1    5.80    1.90
 -11   2  -1    3.90    1.70
 -11  -2   1    8.00    1.20
 -11   2  -1    7.30    1.10
 -11  -2   1    6.00    1.20
 -11   2  -1    6.30    0.90
 -11  -2   1    8.00    1.30
 -11   2  -1    7.50    1.30
 -11  -2   1    7.00    1.10
 -11   2  -1    6.90    1.00
 -12  -2  -1  226.68    9.30
 -12   2   1  236.18    9.70
 -12  -2  -1  229.38    9.20
 -12   2   1  236.28   10.30
 -12   2   1  229.48    9.10
 -12   2   1  239.18    9.10
 -12   2   1  235.08    9.30
 -12   2   1  221.48   11.10
 -12  -2   1  220.58    9.30
 -12  -2   1  229.98    9.30
 -12  -2   1  228.78    9.30
 -12   2  -1  226.38    9.10
 -12   2  -1  231.58   10.00
 -13  -2  -1   12.20    1.00
 -13  -2   1   11.40    1.00
 -13  -2   1   11.00    1.00
   0   3  -1   -0.70    2.00
   0  -3  -1    2.10    2.50
   0   3   1    0.20    0.40
  -1   3   1  289.97   11.30
  -1  -3  -1  271.57   19.00
   1   3  -1  286.97   19.20
  -1   3   1  297.07   14.70
  -1   3  -1  281.17   11.20
   1  -3  -1  270.97   18.70
  -1   3  -1  297.37   18.40
   1   3   1  300.47   12.70
  -2  -3  -1 1917.71   80.99
  -2   3   1 1776.52   70.99
  -2   3   1 1898.51   76.49
   2   3  -1 1882.61   82.29
  -2   3  -1 1915.21   75.09
  -2   3  -1 1965.20   78.49
   2   3   1 1866.81   71.99
  -3  -3  -1  298.27   20.10
  -3   3   1  298.47   19.00
  -3  -3  -1  290.77   20.90
  -3  -3   1  310.37   21.00
   3   3   1  262.87   14.10
  -3   3  -1  288.27   17.80
  -3   3  -1  300.27   17.90
  -4  -3  -1   21.40    5.60
  -4   3   1    9.90    4.30
  -4  -3   1    6.00    4.10
   4   3   1   13.10    2.50
  -5  -3  -1  498.55   30.00
  -5   3   1  522.55   32.10
  -5  -3  -1  510.55   29.50
   5   3   1  501.95   23.90
  -5  -3   1  516.75   28.50
  -5   3  -1  511.35   30.30
  -5  -3   1  535.95   30.10
  -6  -3  -1   53.99    8.00
  -6  -3  -1   55.99    7.70
  -6   3   1   81.99   11.20
   6   3   1   65.99    6.40
  -6   3  -1   63.09    9.60
  -6  -3   1   58.79    7.10
  -6  -3   1   72.79    8.30
  -7  -3  -1   24.50    2.40
  -7   3   1   22.30    2.20
  -7  -3  -1   22.10    1.70
  -7  -3  -1   20.40    1.60
  -7   3   1   17.70    1.70
  -7   3   1   25.50    8.00
  -7  -3  -1   22.30    2.70
  -7   3   1   21.20    1.80
  -7   3   1   21.00    1.50
  -7  -3  -1   16.80    2.40
   7   3  -1   22.40    4.20
  -7   3   1   16.10    3.30
  -7  -3   1   18.80    2.40
  -7   3  -1   22.00    1.70
  -7   3  -1   18.40    1.50
  -7   3  -1   18.30    3.20
  -7   3  -1   11.70    5.20
  -7   3  -1   22.80    1.90
  -7   3  -1   21.00    2.00
  -7   3  -1   20.10    2.70
  -7  -3   1   19.60    1.70
  -7  -3   1   22.50    2.90
  -7  -3   1   19.60    1.80
   7   3   1   24.10    4.10
  -8   3   1    0.30    1.40
  -8  -3  -1    0.20    0.60
  -8  -3  -1    1.30    0.60
  -8   3   1    0.90    0.80
  -8   3   1   -1.00    1.50
  -8  -3  -1    0.40    1.10
  -8   3   1    1.60    0.60
  -8  -3  -1    1.10    1.20
  -8   3   1    0.60    0.50
  -8   3   1   -6.30    3.90
  -8  -3  -1    0.40    0.50
  -8  -3  -1    1.50    0.70
  -8   3   1    1.50    0.70
  -8  -3   1    0.70    0.60
  -8  -3   1   -0.30    0.60
  -8   3  -1    1.50    0.80
   8   3   1    4.10    2.30
  -8  -3   1   -0.20    0.60
  -8  -3   1    0.80    1.20
  -8  -3   1    0.50    1.20
  -8  -3   1    0.40    0.60
  -8   3  -1    0.90    0.50
  -8   3  -1    1.00    0.60
  -8   3  -1   -2.90    4.00
  -8   3  -1   -0.90    1.20
  -8   3  -1    1.20    1.30
  -8   3  -1    0.80    0.50
  -9   3   1   25.50    3.40
  -9   3   1   34.10    2.80
  -9   3   1   32.80    2.40
  -9   3   1   29.50    2.00
  -9  -3  -1   28.00    2.20
  -9  -3  -1   29.30    2.10
   9   3  -1   19.00    5.20
  -9   3   1   33.50    4.50
  -9  -3  -1   31.90    2.50
  -9  -3  -1   31.30    2.30
  -9   3   1   32.80    2.10
  -9   3   1   34.80    9.80
  -9  -3   1   30.10    2.60
  -9   3  -1   30.40    4.10
  -9   3  -1   30.30    2.20
  -9   3  -1   30.90    3.60
  -9   3  -1   30.00    2.00
  -9  -3   1   34.20    3.80
   9   3   1   30.00    5.00
  -9   3  -1   17.90    8.80
  -9  -3   1   29.50    2.30
  -9   3  -1   31.10    2.50
  -9   3  -1   34.20    2.10
  -9  -3   1   27.50    2.30
  -9  -3   1   31.00    2.20
 -10   3   1    9.90    1.40
 -10   3   1   11.80    2.60
 -10   3   1   12.80    2.90
  10   3  -1   15.10    5.10
 -10  -3  -1   11.80    1.40
 -10  -3  -1   11.50    1.40
 -10  -3  -1   12.90    1.50
 -10   3   1   12.40    1.40
 -10   3   1   12.80    1.90
 -10  -3  -1   12.50    1.70
 -10   3   1   11.50    1.50
 -10  -3   1   11.80    1.50
 -10   3  -1   13.70    2.90
 -10   3  -1   12.80    1.30
 -10  -3   1   10.90    1.50
 -10  -3   1   11.10    1.50
 -10  -3   1   12.40    1.70
 -10   3  -1   12.90    1.70
  10   3   1   12.00    4.40
 -10   3  -1   13.80    1.40
 -10   3  -1   13.30    1.50
 -10   3  -1   10.80    2.30
 -11   3   1   77.69    4.40
 -11   3   1   81.79    3.80
 -11   3   1   85.29    5.60
 -11  -3  -1   75.79    3.90
 -11  -3  -1   79.59    4.10
 -11   3   1   81.69    3.80
 -11   3   1   79.49    6.10
 -11  -3  -1   76.99    3.90
 -11   3   1   79.69    4.00
 -11   3  -1   78.29    5.20
 -11  -3   1   78.19    4.10
 -11   3  -1   88.09    4.30
 -11   3  -1   85.49    3.80
 -11  -3   1   75.69    4.00
 -11   3  -1   85.09    3.90
 -11  -3   1   85.19    4.40
 -11  -3   1   79.49    4.00
 -11   3  -1   81.89    3.70
 -11   3  -1   82.39    5.80
 -12   3   1    9.60    1.90
 -12   3   1    8.50    1.90
 -12  -3  -1    9.40    1.00
 -12   3   1   10.30    1.30
 -12  -3  -1   11.60    1.20
 -12  -3   1   10.20    1.20
 -12  -3   1   11.10    1.20
 -12   3  -1   16.20    2.60
 -12  -3   1   11.20    1.10
 -13  -3  -1    0.70    0.40
 -13  -3   1    1.30    0.40
 -13  -3   1    1.30    0.50
   0   4  -1  666.63   27.40
   0   4  -1  700.13   37.50
   0   4   1  711.53   27.10
   0  -4  -1  690.53   38.30
  -1  -4  -1  574.84   33.80
  -1   4   1  573.74   22.10
   1   4  -1  563.84   33.70
  -1   4  -1  594.24   32.60
   1   4   1  578.34   23.60
  -1   4  -1  570.34   22.10
   1  -4  -1  580.24   34.00
   2   4  -1  235.38   20.00
  -2   4   1  248.08   15.90
  -2  -4  -1  222.78   18.90
  -2   4   1  241.98   10.40
  -2   4  -1  238.88   14.40
   2   4   1  232.08   12.00
  -2   4  -1  246.28   18.20
  -3  -4  -1   11.30    9.00
  -3   4   1    5.70    3.10
  -3  -4  -1   15.60    5.90
   3   4   1    7.60    1.90
  -3   4  -1    6.70    4.00
  -3  -4   1   10.70    7.50
  -4   4   1  841.22   45.00
  -4  -4  -1  865.01   45.70
  -4  -4  -1  831.62   47.20
   4  -4  -1  744.43   32.20
  -4  -4   1  901.01   48.00
  -4   4  -1  884.41   43.90
   4   4   1  840.02   36.00
  -4  -4   1  911.81   46.80
  -5  -4  -1   90.29   14.70
  -5   4   1  111.19   14.10
  -5  -4  -1   99.29   12.60
  -5  -4   1  126.69   14.50
  -5  -4   1  114.59   12.90
   5   4   1  111.69    8.40
  -5   4  -1  117.09   13.40
  -6   4   1   16.50    6.30
   6   4  -1   26.60    4.40
  -6  -4  -1   19.30   13.10
  -6  -4  -1   15.10    6.60
  -6  -4   1   19.10    5.80
   6   4   1   17.80    5.00
  -6   4  -1   23.50    7.50
  -7  -4  -1   -0.50    0.50
  -7  -4  -1   -1.50    3.00
  -7   4   1   -0.10    0.60
  -7  -4  -1    0.70    0.50
  -7  -4  -1   -4.70    3.60
  -7  -4  -1   -0.50    0.40
  -7   4   1    1.20    1.40
  -7  -4  -1    1.10    0.50
   7   4  -1   -0.80    1.40
  -7   4   1   -4.80    3.60
  -7   4   1    1.90    1.30
  -7   4   1    1.50    0.50
  -7   4  -1    0.80    0.60
  -7  -4   1    0.80    0.60
  -7  -4   1   -0.60    0.40
  -7   4  -1    0.80    0.40
  -7   4  -1   -1.50    4.80
  -7  -4   1    0.40    0.60
  -7  -4   1    1.30    0.50
  -7   4  -1    2.20    1.40
  -7   4  -1    0.60    0.50
   7   4   1   -1.30    1.60
  -7   4  -1    0.10    0.40
  -7  -4   1    0.40    0.90
   8   4  -1    7.60    3.30
  -8   4   1   11.00    1.20
  -8  -4  -1    8.80    1.30
  -8   4   1   10.90    1.10
  -8  -4  -1   11.00    1.40
  -8  -4  -1    9.60    1.30
  -8   4   1   12.00    1.80
  -8  -4  -1    8.70    1.20
  -8   4   1    5.50    5.90
  -8   4   1   10.30    2.50
  -8   4   1    9.50    1.40
  -8   4   1    9.40    2.70
  -8  -4   1    8.40    1.30
  -8   4  -1   11.90    1.60
  -8   4  -1   12.70    2.30
  -8   4  -1    7.40    6.60
  -8  -4   1   10.20    1.50
   8   4   1    9.10    3.10
  -8   4  -1   14.90    3.30
  -8  -4   1    9.10    1.30
  -8  -4   1    8.40    1.30
  -8   4  -1    9.90    1.30
  -8   4  -1   10.00    1.10
  -8  -4   1   12.50    2.40
  -8   4  -1    9.10    1.00
   9   4  -1   83.49    9.00
  -9  -4  -1   77.49    4.10
  -9  -4  -1   78.19    4.10
  -9   4   1   81.49    4.20
  -9  -4  -1   81.49    4.40
  -9   4   1   78.99    4.80
  -9   4   1   82.09    3.90
  -9   4   1   80.99    3.80
  -9   4   1   84.79    7.10
  -9   4   1   84.59    5.90
  -9   4   1   64.99   14.40
  -9  -4  -1   81.99    4.30
  -9   4  -1   85.99    3.90
  -9   4  -1   55.19   12.60
  -9  -4   1   78.69    4.20
  -9   4  -1   83.59    3.90
  -9  -4   1   80.29    4.30
  -9  -4   1   81.39    4.50
  -9   4  -1   84.99    4.10
  -9  -4   1   77.99    4.20
  -9   4  -1   88.79    6.80
  -9   4  -1   82.79    5.80
   9   4   1   67.39    7.80
  -9   4  -1   90.99    4.70
 -10   4   1    0.10    0.40
 -10   4   1   -0.10    1.40
 -10   4   1    0.90    0.60
 -10   4   1   -0.10    0.60
 -10  -4  -1    0.00    0.50
 -10  -4  -1    0.20    0.50
 -10   4   1    0.70    0.60
 -10  -4  -1    0.50    0.60
 -10   4   1    0.00    1.50
 -10   4  -1    0.70    0.60
 -10   4  -1    0.10    0.50
 -10   4  -1    0.90    0.50
 -10   4  -1    0.80    0.70
 -10   4  -1    0.50    1.60
 -10  -4   1    0.40    0.70
 -10  -4   1   -0.40    0.50
 -10  -4   1    0.40    0.70
 -10  -4   1    0.50    0.60
 -10   4  -1   -1.20    1.30
 -11  -4  -1    1.30    0.60
 -11  -4  -1    2.50    0.70
 -11   4   1    2.00    1.80
 -11  -4  -1    1.90    0.70
 -11   4   1    1.80    1.70
 -11   4   1    1.10    0.70
 -11   4   1    3.20    0.70
 -11   4  -1    2.20    1.50
 -11   4  -1   -0.20    1.30
 -11  -4   1    1.70    0.60
 -11  -4   1    1.60    0.60
 -11  -4   1    2.00    0.70
 -11   4  -1    2.20    0.80
 -12  -4  -1    0.40    0.50
 -12  -4  -1    0.90    0.50
 -12   4   1   -0.20    1.00
 -12   4   1    0.10    0.50
 -12  -4   1    0.80    0.50
 -12   4  -1    1.00    1.10
 -12  -4   1    0.20    0.50
 -12   4  -1    0.10    0.80
 -12  -4   1    0.30    0.50
 -13  -4  -1    0.00    0.30
 -13  -4   1    0.30    0.30
 -13  -4   1    0.00    0.30
   0   5  -1   -2.50    2.80
   0  -5  -1    2.00    4.40
   0   5  -1   -0.10    0.50
   0   5   1   -0.40    0.40
   1   5  -1  104.49    6.50
  -1   5   1  103.69    5.00
   1   5  -1   97.49   15.30
  -1  -5  -1   96.89   13.20
  -1   5  -1  104.49    5.00
   1   5   1  104.99    6.30
   1  -5  -1  104.29   13.60
  -1   5  -1  107.89   13.00
  -2   5   1    4.10    2.70
  -2   5   1    2.20    0.90
  -2   5  -1    0.90    1.50
   2   5   1    0.50    0.80
  -3   5   1   15.20    5.10
  -3  -5  -1    3.70    4.40
  -3  -5   1    7.00    5.00
   3   5   1    7.80    2.00
  -3   5  -1   14.90    4.40
  -4   5   1  141.09   15.20
  -4  -5  -1  124.99   15.60
  -4  -5  -1  110.69   21.70
  -4  -5   1  128.79   16.10
  -4   5  -1  134.79   14.30
   4   5   1  127.39    8.80
  -4  -5   1  159.18   21.40
  -5  -5  -1   24.40    8.90
   5   5  -1   24.70    3.90
  -5   5   1   18.30    7.70
   5   5   1   26.20    3.90
  -5  -5   1   14.20    7.20
  -5   5  -1   26.40    7.80
  -5  -5   1   29.90   11.80
  -6   5   1    9.60    2.50
  -6  -5  -1   10.10    6.80
  -6  -5  -1    9.30    1.20
   6   5  -1   10.70    3.50
  -6  -5  -1    9.10   10.60
  -6   5   1    9.90    0.90
  -6   5   1    6.20    6.10
  -6  -5  -1    9.60    1.10
  -6   5   1   12.60    2.40
  -6   5  -1   13.50    2.40
  -6  -5   1    8.40    1.80
  -6   5  -1    6.10    6.10
  -6  -5   1   30.30   20.00
  -6  -5   1   15.00    7.10
   6   5   1   10.20    2.90
  -6   5  -1   10.50    0.90
  -6  -5   1    9.10    1.20
  -6  -5   1   10.30    1.10
  -7   5   1    1.00    0.70
  -7  -5  -1    1.80    0.50
  -7  -5  -1   12.20    6.60
  -7   5   1    0.20    1.40
  -7   5   1    5.40    5.70
   7   5  -1    2.10    2.20
  -7  -5  -1    1.80    0.60
  -7  -5  -1    2.50    0.70
  -7  -5  -1    1.80    0.70
  -7   5   1    2.00    0.60
  -7  -5  -1    2.60    8.50
  -7   5   1    2.40    0.50
  -7   5   1    2.20    1.80
  -7   5   1    2.40    1.00
  -7  -5   1    1.70    0.60
  -7   5  -1    0.90    5.30
  -7  -5   1  -10.10    7.00
  -7  -5   1    3.30    0.90
  -7   5  -1    0.80    1.60
  -7  -5   1    1.10    5.50
  -7  -5   1    1.80    0.70
  -7  -5   1    2.80    0.70
   7   5   1    3.00    2.10
  -7   5  -1    1.90    0.50
  -7   5  -1    0.40    1.40
  -7   5  -1    1.40    0.50
  -7   5  -1    1.20    0.60
  -8  -5  -1  200.38    8.60
  -8   5   1  167.78   21.60
  -8  -5  -1  192.58    8.40
  -8   5   1  199.38    8.40
  -8   5   1  203.78   15.80
  -8   5   1  206.28    9.20
  -8  -5  -1  191.28    9.30
   8   5  -1  203.48   15.60
  -8   5   1  194.78   10.40
  -8   5   1  201.78    8.00
  -8   5  -1  181.48   20.10
  -8   5  -1  204.08    8.30
  -8   5  -1  207.88    9.00
  -8   5  -1  185.38   10.60
  -8  -5   1  191.78    8.60
  -8   5  -1  212.18   11.60
  -8  -5   1  192.08    8.80
  -8   5  -1  201.58    8.00
   8   5   1  212.28   16.20
  -9   5   1   16.40    1.30
  -9   5   1   15.90    2.00
  -9   5   1   12.70    2.90
  -9   5   1   15.00    1.50
  -9  -5  -1   14.90    1.50
   9   5  -1   12.90    4.40
  -9   5   1   13.60    2.60
  -9  -5  -1   13.90    1.60
  -9   5   1   12.70   11.50
  -9  -5  -1   16.40    1.50
  -9   5   1   15.30    1.30
  -9  -5   1   17.70    1.80
   9   5   1   14.40    4.10
  -9   5  -1   15.00    3.20
  -9   5  -1   16.00    1.40
  -9   5  -1   17.10    3.10
  -9   5  -1   14.20    1.70
 -10   5   1   50.79    5.30
 -10   5   1   49.90    3.30
 -10  -5  -1   53.09    3.00
 -10  -5  -1   50.99    2.80
 -10   5   1   51.99    2.80
 -10  -5  -1   59.39    4.50
 -10   5  -1   49.99    4.80
 -10   5  -1   50.09    3.10
 -10  -5   1   49.50    3.00
 -10  -5   1   51.39    4.50
 -10  -5   1   49.99    3.10
 -10   5  -1   46.10    5.00
 -11   5   1    5.80    1.80
 -11  -5  -1    5.80    0.90
 -11  -5  -1    5.80    1.00
 -11   5   1    6.90    2.10
 -11   5   1    6.10    1.10
 -11  -5   1    4.90    0.90
 -11  -5   1    5.40    0.90
 -11   5  -1    6.10    1.80
 -11   5  -1    8.00    2.00
 -11  -5   1    6.20    0.90
 -12   5   1    2.80    1.20
 -12  -5  -1    3.90    0.60
 -12  -5  -1    4.30    0.80
 -12   5   1    3.00    1.40
 -12   5  -1    3.90    1.30
 -12  -5   1    3.70    0.80
 -12  -5   1    4.50    0.70
 -13  -5  -1    4.50    0.50
 -13  -5   1    3.20    0.70
 -13  -5   1    4.00    0.50
   0   6   1   16.20    2.00
   0   6  -1   15.50    2.10
   0  -6  -1   21.20    7.20
  -1  -6  -1   47.70   11.20
   1   6  -1   40.60    3.90
  -1   6   1   39.10    2.70
  -1   6  -1   34.60    2.50
   1   6   1   39.90    3.60
   1  -6  -1   29.20   10.20
  -2   6   1   68.09    8.90
  -2   6   1   75.59    4.50
  -2  -6  -1   67.99   12.20
   2   6  -1   75.99    6.10
   2   6   1   74.99    5.70
  -2   6  -1   75.09    8.60
  -2  -6   1   76.89   13.30
   2  -6  -1   80.29   18.10
   3   6  -1    1.80    1.50
  -3   6   1    2.00    2.50
  -3  -6  -1    8.60    5.00
   3   6   1    4.60    1.60
  -3  -6   1    1.00    4.70
  -3   6  -1    6.40    3.10
  -4   6   1  801.32   46.60
   4   6  -1  752.72   35.00
  -4  -6  -1  791.22   49.20
  -4   6  -1  811.32   45.30
  -4  -6   1  801.72   49.80
   4   6   1  770.32   34.40
  -5   6   1  170.08    8.80
   5   6  -1  191.68   12.70
  -5  -6  -1  210.88   22.40
  -5   6   1  149.09   25.10
  -5  -6   1  186.58   20.50
  -5   6  -1  200.08   20.70
  -5   6  -1  179.38    9.10
  -5  -6   1  161.78    7.40
   5   6   1  184.38   11.90
  -6  -6  -1   14.80    1.30
  -6   6   1   18.40    2.70
   6   6  -1   22.70    4.30
  -6   6   1   25.30    3.70
  -6   6   1    8.60    6.70
  -6  -6  -1   20.20    1.60
  -6  -6  -1   21.40    9.70
  -6   6  -1   17.30    2.50
  -6  -6   1   19.10    1.70
  -6  -6   1    5.90    6.50
   6   6   1   11.00    3.30
  -6  -6   1   17.80    1.60
  -6   6  -1   17.40    3.20
  -6   6  -1   10.90    6.20
  -6  -6   1   17.60    1.50
  -7   6   1    2.00    0.60
  -7  -6  -1    2.50    0.60
   7   6  -1    2.00    0.40
  -7   6   1    1.30    1.50
  -7   6   1    1.10    7.00
  -7   6   1    3.20    1.00
   7   6  -1    2.60    2.10
  -7  -6  -1    4.00    0.90
  -7  -6  -1    3.60   15.90
  -7   6   1    4.30    2.20
  -7  -6  -1    1.00    0.50
  -7  -6  -1   -1.30    6.00
  -7  -6   1    2.30    0.70
  -7  -6   1   -5.40    6.80
   7   6   1    2.70    0.40
  -7   6  -1    1.30    1.60
  -7   6  -1    4.10    0.70
  -7   6  -1   -1.70    1.40
  -7  -6   1    2.90    0.70
  -7   6  -1    1.90    0.90
   7   6   1    3.20    2.40
  -7   6  -1   23.50    9.00
  -7  -6   1    1.50    0.70
  -7  -6   1    3.40   14.00
  -7  -6   1    4.00    0.90
  -8  -6  -1   45.00    2.60
  -8   6   1   49.20    5.60
  -8   6   1   50.59    4.70
  -8   6   1   53.29    3.50
  -8   6   1   48.50    2.70
   8   6  -1   39.10    6.80
  -8  -6  -1   47.90    3.00
  -8   6   1   39.80   13.10
  -8  -6  -1   45.60    2.70
  -8   6  -1   50.49    2.50
  -8  -6   1   47.40    2.80
  -8  -6   1   46.60    2.80
  -8   6  -1   20.60   11.50
   8   6   1   43.70    6.40
  -8   6  -1   49.80    5.20
  -8   6  -1   51.19    4.70
  -8  -6   1   46.30    3.00
  -8   6  -1   52.19    3.20
  -9  -6  -1   13.20    1.60
  -9  -6  -1   14.40    1.40
   9   6  -1   14.00    4.40
  -9   6   1   14.60    1.80
  -9   6   1   16.20    1.30
  -9  -6  -1   14.20    1.30
  -9   6   1   14.10   13.40
  -9  -6   1   14.60    1.50
  -9   6  -1   14.60    1.60
  -9   6  -1   12.00    2.60
   9   6   1   14.10    4.60
  -9   6  -1   14.00    3.20
  -9  -6   1   13.50    1.40
  -9  -6   1   13.50    1.60
 -10   6   1   49.60    5.00
 -10   6   1   44.50    4.50
 -10   6   1   49.80    3.00
 -10  -6  -1   49.20    2.90
 -10  -6  -1   46.70    2.60
 -10  -6   1   43.80    2.60
 -10   6  -1   49.40    4.30
 -10   6  -1   48.90    4.50
 -10   6  -1   47.50    2.70
 -10  -6   1   46.50    2.70
 -10  -6   1   47.70    3.00
 -11  -6  -1    5.90    1.00
 -11   6   1    5.70    1.00
 -11  -6  -1    6.40    0.80
 -11   6   1    6.10    2.00
 -11   6   1    5.40    1.70
 -11  -6   1    7.60    1.10
 -11   6  -1    7.40    2.00
 -11  -6   1    6.90    1.00
 -11   6  -1    6.10    1.60
 -12  -6  -1   -0.20    0.30
 -12   6   1   -1.00    0.90
 -12   6   1   -0.10    0.70
 -12  -6  -1    0.00    0.30
 -12  -6   1    0.30    0.40
 -12  -6   1   -0.20    0.30
   0   7  -1   -1.20    0.80
   0  -7  -1    8.60    8.00
   0  -7   1   -3.50    7.40
   0   7   1    0.40    0.60
  -1  -7  -1   -7.10    4.20
   1   7  -1    3.10    1.40
  -1   7   1    2.00    0.70
  -1   7   1    1.30    1.60
   1  -7   1   11.40   11.50
  -1  -7   1    7.30    5.00
   1   7   1    2.70    1.10
  -1   7  -1    0.70    0.60
   2   7  -1    1.20    1.30
  -2   7   1    1.90    1.20
  -2   7   1    1.70    2.20
  -2  -7  -1   14.40    7.40
   2  -7   1   -6.00   14.60
  -2  -7   1    2.50    4.40
  -2   7  -1    1.10    2.30
   2  -7  -1   13.30   16.00
   2   7   1    4.50    1.50
  -3   7   1  634.24   39.60
  -3  -7  -1  734.53   48.50
   3   7  -1  673.83   30.40
  -3   7  -1  654.73   38.90
   3   7   1  664.63   29.70
  -3  -7   1  662.23   47.30
   4   7  -1  428.36   21.70
  -4  -7  -1  461.35   36.90
  -4   7   1  415.06   32.10
  -4   7   1  393.56   17.50
  -4   7  -1  380.86   30.30
   4   7   1  438.26   21.20
  -4  -7   1  431.36   36.20
  -4   7  -1  387.26   17.60
  -5   7   1  172.38   10.50
   5   7  -1  141.49    5.90
   5   7  -1  163.28   11.70
  -5   7   1  154.68   20.50
  -5  -7  -1  189.28   34.30
  -5  -7  -1  140.89    6.80
  -5   7   1  144.29    8.10
  -5  -7   1  189.18   27.80
  -5  -7   1  147.99    6.60
   5   7   1  145.69    5.90
  -5   7  -1  150.78    9.30
  -5   7  -1  152.08   20.00
  -5  -7   1  150.48    7.20
  -5   7  -1  154.38    8.20
   5   7   1  162.08   11.10
  -6  -7  -1    1.10    0.60
  -6   7   1    5.40    2.00
  -6  -7  -1    3.60    0.90
  -6  -7  -1   -0.10    8.40
  -6   7   1   -0.30    1.70
  -6   7   1    1.20    2.10
  -6   7   1   10.80    8.20
   6   7  -1    0.50    1.70
   6   7  -1    1.00    0.30
  -6  -7   1    2.20    0.80
  -6   7  -1    2.60    1.80
  -6   7  -1   -3.00    5.60
  -6  -7   1    2.40    8.20
   6   7   1    1.30    0.30
   6   7   1    6.70    2.30
  -6  -7   1    2.40    0.60
  -6   7  -1    2.50    1.60
   7   7  -1   -3.60    2.20
  -7   7   1   -1.20    1.50
  -7   7   1    0.00    0.90
  -7  -7  -1    0.50    0.40
   7   7  -1    0.50    0.30
  -7  -7  -1    0.50    0.50
  -7  -7  -1    3.10    8.50
  -7   7   1   13.50   17.30
  -7  -7  -1   -0.20    0.50
  -7   7   1    0.40    2.10
  -7   7  -1    4.00    9.90
   7   7   1   -0.20    2.10
  -7   7  -1   -0.60    1.60
   7   7   1    0.80    0.30
  -7   7  -1    2.00    1.60
  -7  -7   1    0.20    0.40
  -7  -7   1   12.20    8.90
  -7  -7   1    1.50    0.70
  -7  -7   1    0.40    0.60
  -8   7   1  156.98    7.00
  -8  -7  -1  147.69    6.60
  -8   7   1  161.18   10.20
  -8   7   1  156.48   22.90
  -8   7   1  143.49    8.60
   8   7  -1  139.89    5.60
  -8  -7  -1  137.99    6.00
  -8  -7  -1  141.89    6.20
   8   7  -1  139.99   12.50
  -8  -7   1  135.99    6.20
  -8  -7   1  143.99    6.60
  -8   7  -1   89.09   21.70
  -8   7  -1  150.38    8.60
  -8   7  -1  155.98    9.40
  -8  -7   1  141.59    6.30
   8   7   1  133.49    5.60
   8   7   1  145.99   12.10
  -9  -7  -1   29.40    2.40
  -9   7   1   30.20    3.80
  -9  -7  -1   33.70    2.50
  -9   7   1   28.10    2.10
  -9  -7   1   26.00    1.80
  -9   7  -1   27.80    5.00
  -9   7  -1   29.90    3.90
   9   7   1   22.90    1.30
 -10  -7  -1   69.89    3.40
 -10   7   1   71.19    3.60
 -10  -7  -1   75.09    3.80
 -10   7   1   70.19    5.40
 -10   7   1   69.79    5.80
 -10   7  -1   70.09    5.30
 -10  -7   1   75.69    3.90
 -10  -7   1   70.99    3.50
 -10   7  -1   78.19    5.40
 -11  -7  -1    4.00    0.90
 -11  -7  -1    3.40    0.50
 -11   7   1    3.40    1.60
 -11   7   1    2.00    1.40
 -11  -7   1    3.40    0.80
 -11   7  -1    2.00    1.10
 -11  -7   1    3.70    0.60
 -11   7  -1    3.80    1.70
 -12  -7  -1    0.00    0.30
 -12   7   1    0.70    1.00
 -12  -7   1    0.10    0.50
 -12   7  -1    0.50    1.00
 -12  -7   1    0.10    0.20
   0   8  -1  154.98    8.60
   0  -8  -1  185.68   23.30
   0   8   1  163.58    8.60
   0  -8   1  183.68   23.30
  -1  -8  -1   31.90   12.50
  -1   8   1   28.60    2.60
  -1   8   1   21.90    6.80
   1   8  -1   29.20    3.60
   1  -8   1   43.00   18.20
  -1  -8   1   14.50   10.50
   1   8   1   24.10    3.20
  -1   8  -1   28.30    2.40
   1  -8  -1   30.00   18.00
   2   8  -1   91.69    7.00
  -2   8   1   82.99    5.70
  -2   8   1   85.79   11.70
   2   8  -1   91.09    3.80
  -2  -8  -1   96.59   21.60
   2   8   1   90.69    3.80
   2   8   1   82.69    6.50
  -2   8  -1   74.39   12.10
  -2  -8   1   85.29   17.00
   3   8  -1   12.20    0.80
  -3   8   1   13.60    6.80
   3   8  -1   16.50    3.30
  -3  -8  -1   10.10    9.90
  -3  -8   1   28.70   10.20
   3   8   1   13.70    2.80
  -3   8  -1   12.80    4.90
   3   8   1   11.20    0.80
  -4  -8  -1   87.59   15.10
  -4   8   1   74.09    8.30
   4  -8   1   64.99    3.00
   4   8  -1   72.69    3.00
   4   8  -1   79.79    7.50
  -4  -8  -1   70.09    3.00
  -4   8   1   82.79    5.20
  -4   8  -1   77.79   14.10
   4   8   1   70.09    3.00
  -4   8  -1   88.69    6.70
   4   8   1   83.49    7.30
   4  -8  -1   63.89    3.00
  -4  -8   1   78.19   33.50
   5  -8   1   27.30    1.60
  -5  -8  -1   63.29   17.00
  -5   8   1   31.60   11.90
  -5   8   1   41.50    5.00
  -5   8   1   36.10    3.70
   5   8  -1   27.50    5.00
  -5  -8  -1   29.30    2.10
   5   8  -1   32.80    1.60
  -5  -8   1   34.70    2.30
  -5  -8   1   37.90   13.60
   5  -8  -1   31.00    1.80
   5   8   1   32.90    1.60
  -5   8  -1   35.20    3.60
   5   8   1   40.20    5.00
  -5  -8   1   27.40    2.00
  -5   8  -1   28.70    4.20
  -5   8  -1   38.40   11.60
  -6   8   1    7.20    3.00
   6   8  -1    0.40    3.20
  -6   8   1   -1.50    1.50
  -6   8   1    4.30    8.10
  -6  -8  -1   -0.70    0.60
   6   8  -1    1.00    0.30
   6   8   1   -1.00    2.00
  -6   8  -1    0.90    1.60
  -6   8  -1   -0.50    8.20
  -6  -8   1    0.90    0.60
  -7   8   1    1.60    1.90
   7   8  -1    0.80    0.30
   7   8  -1    0.80    2.80
  -7   8   1    3.50   10.80
  -7  -8  -1    1.70    0.80
  -7  -8  -1    0.60    0.50
  -7   8   1    3.70    2.10
  -7   8  -1    2.80    1.90
  -7  -8   1    1.20    0.80
  -7   8  -1    0.40    1.80
  -7   8  -1   -6.90   11.10
   7   8   1    1.30    0.30
  -7  -8   1    1.60    0.60
  -8  -8  -1   10.40   15.80
  -8  -8  -1   21.30   12.10
  -8   8   1   20.70   18.60
  -8   8  -1    0.90    1.60
  -8  -8   1   -5.80    9.00
  -8  -8   1    5.30    9.20
  -9  -8  -1    1.80    0.50
  -9   8   1    0.90    1.60
   9   8  -1    0.40    0.30
  -9  -8  -1    1.10    0.70
  -9   8   1    2.60    1.80
  -9   8  -1    2.90    1.50
  -9   8  -1    1.10    1.30
  -9  -8   1    1.30    0.60
   9   8   1    0.60    0.30
  -9  -8   1    0.30    0.60
 -10  -8  -1    2.20    0.70
 -10   8   1    1.50    1.50
 -10   8   1    1.40    1.50
 -10  -8  -1    1.10    0.40
 -10  -8   1    0.40    0.60
 -10   8  -1    1.20    1.20
 -10   8  -1    1.80    1.40
 -10  -8   1    1.10    0.70
 -11   8   1    6.90    1.60
 -11   8   1    8.60    1.80
 -11  -8  -1    8.20    0.90
 -11  -8   1    8.30    1.00
 -11   8  -1    7.90    1.70
 -11  -8   1    9.10    0.80
 -12  -8  -1   53.39    2.30
 -12   8   1   45.30    2.80
 -12  -8   1   54.59    2.40
 -12   8  -1   53.79    3.20
   0   9  -1   -0.80    1.00
   0   9   1    0.20    0.30
   0  -9  -1    0.30   12.70
   0  -9  -1   -0.20    0.30
   0  -9   1   -0.50    0.20
   0   9   1    0.70    1.10
  -1   9   1    2.30    2.40
  -1   9   1    6.60    0.50
  -1   9   1    4.40    1.50
  -1  -9  -1  -13.10    8.60
  -1  -9  -1    5.40    0.50
   1   9  -1    5.40    0.50
   1  -9   1    5.40    0.50
   1  -9   1   33.40   17.10
   1   9  -1    7.40    2.00
   1  -9  -1    4.90    0.60
  -1   9  -1    3.60    3.20
   1   9   1    5.50    0.50
  -1   9  -1    5.30    0.50
   1  -9  -1   25.40   31.60
   1   9   1    5.70    1.70
  -1  -9   1    5.20    0.60
  -2   9   1  494.85   34.10
  -2  -9  -1  532.75   46.00
  -2  -9  -1  476.95   17.70
   2   9  -1  511.65   23.10
   2  -9   1  450.85   17.70
   2   9  -1  469.95   17.70
  -2   9   1  445.46   17.60
  -2   9  -1  456.25   17.60
  -2   9  -1  472.35   32.40
   2  -9  -1  454.75   17.70
  -2  -9   1  486.85   43.90
  -2  -9   1  482.15   17.70
   2   9   1  471.25   17.70
   2   9   1  512.35   22.60
   3   9  -1   10.50    0.80
  -3  -9  -1   12.20    0.70
  -3   9   1    5.60    5.80
  -3  -9  -1   28.10   15.70
   3   9  -1    9.30    3.00
   3  -9   1    9.90    0.70
  -3   9  -1   14.40    3.30
   3   9   1   11.30    0.80
  -3  -9   1   10.80    0.70
   3   9   1    7.10    2.50
   3  -9  -1   10.20    0.80
  -3   9  -1    9.20    5.00
   4   9  -1   42.30    5.50
  -4   9   1   41.10    5.00
  -4   9   1   28.90   11.20
  -4   9   1   42.50    3.90
   4   9  -1   37.10    1.80
  -4  -9  -1   45.30   18.90
  -4  -9  -1   34.90    1.60
   4  -9   1   35.90    1.70
  -4  -9   1   36.00    1.60
  -4  -9   1   34.90   15.40
   4   9   1   36.60    1.70
  -4   9  -1   40.40    4.80
   4   9   1   28.60    4.20
   4  -9  -1   36.20    1.70
  -4   9  -1   40.30    4.10
  -5  -9  -1   65.79   20.90
   5  -9   1   27.60    1.50
  -5   9   1   33.30    4.90
   5   9  -1   34.30    1.70
  -5  -9  -1   28.70    2.20
  -5   9   1   22.10   14.00
  -5   9   1   29.80    3.70
  -5   9  -1   36.60   12.00
  -5  -9   1   25.60    2.90
  -5   9  -1   33.00    4.20
   5  -9  -1   28.90    1.50
   5   9   1   19.30    5.30
  -5   9  -1   34.90    5.60
  -5  -9   1   26.40    2.00
  -5  -9   1   46.50   22.70
  -6   9   1  350.26   17.20
  -6  -9  -1  345.77   13.10
  -6  -9  -1  255.67   39.50
  -6   9   1  315.07   15.20
   6   9  -1  321.17   19.50
   6   9  -1  328.87   12.20
  -6   9   1  297.97   35.40
   6  -9   1  299.47   12.20
  -6  -9   1  326.87   12.80
   6  -9  -1  314.67   12.20
  -6   9  -1  315.87   15.20
  -6  -9   1  267.17   42.20
  -6   9  -1  283.77   33.80
  -6  -9   1  334.27   13.20
   6   9   1  325.97   18.80
  -6   9  -1  338.57   16.40
   6   9   1  326.77   12.20
  -7   9   1    6.20    2.40
  -7   9   1   -0.10   16.80
   7   9  -1    6.50    3.70
  -7   9   1    3.50    2.10
   7  -9   1    3.80    0.50
   7   9  -1    4.60    0.60
  -7  -9  -1    5.20    1.00
  -7   9  -1   30.10   30.50
  -7   9  -1    3.40    1.80
  -7  -9   1    8.50   13.00
  -7  -9   1    5.00    0.80
   7   9   1    1.90    4.00
  -7   9  -1    5.40    2.20
  -7  -9   1    6.00    1.10
   7   9   1    5.10    0.60
  -8  -9  -1   24.30    1.90
   8   9  -1   21.20    1.20
  -8   9   1   22.40    3.40
  -8   9   1   22.20    3.80
   8   9   1   23.00    1.20
  -8   9  -1   21.90    3.20
  -8  -9   1   22.10    1.60
  -8  -9   1   22.10    1.90
  -8   9  -1   15.00    2.80
  -8  -9   1   26.10   18.00
  -9  -9  -1   -0.50    0.50
   9   9  -1    0.70    0.30
  -9   9   1    0.30    1.40
  -9   9   1    1.90    1.60
  -9  -9   1    0.10    0.40
   9   9   1    0.00    0.20
  -9   9  -1   -0.20    1.30
  -9   9  -1   -0.40    1.70
  -9  -9   1    0.50    0.50
 -10   9   1   40.10    3.50
 -10   9   1   50.99    4.50
 -10  -9  -1   44.50    2.40
 -10  -9   1   46.00    2.80
 -10  -9   1   40.80    2.00
 -10   9  -1   48.10    4.50
 -11  -9  -1    7.80    0.80
 -11   9   1    9.00    1.70
 -11   9  -1    7.90    1.40
 -11  -9   1    8.00    0.80
   0 -10  -1   83.09    3.40
   0 -10   1  129.39   29.40
   0  10   1   81.89    3.30
   0  10   1   80.79   11.70
   0  10  -1   81.89    3.30
   0 -10   1   81.59    3.40
   0  10   1   66.89    8.30
   1  10  -1    6.10    2.40
  -1 -10  -1  -19.00   17.20
   1 -10   1    7.70    0.70
  -1  10   1    6.60    0.60
   1  10  -1    7.30    0.60
  -1  10   1    0.40    3.20
  -1 -10  -1    7.40    0.70
   1  10   1    7.30    0.60
  -1 -10   1   26.00   16.40
  -1  10  -1    7.30    0.60
  -1 -10   1    7.90    0.70
   1  10   1   10.40    2.40
  -1  10  -1   12.30    5.90
   1 -10  -1    7.20    0.70
  -2 -10  -1   22.60    1.10
   2 -10   1   20.80    1.20
  -2 -10  -1   28.20   17.30
  -2  10   1   20.60    1.10
  -2  10   1   10.60    6.50
   2  10  -1   20.70    1.20
   2  10  -1   24.00    4.00
  -2 -10   1   22.60   12.70
   2 -10  -1   21.10    1.20
   2  10   1   22.60    1.20
   2  10   1   23.00    3.70
  -2  10  -1   11.70    5.60
  -2 -10   1   22.70    1.20
  -2  10  -1   21.40    1.10
   3  10  -1    9.20    0.70
   3  10  -1   10.60    2.90
   3 -10   1    7.70    0.70
  -3 -10  -1    9.10    0.70
  -3 -10  -1   15.20   14.70
  -3 -10   1    8.20    0.60
  -3  10  -1   -1.40    5.60
   3  10   1    9.00    0.80
   3  10   1    7.90    2.90
  -3  10  -1    5.80    2.50
   3 -10  -1    8.00    0.70
  -3 -10   1   45.40   17.10
   4  10  -1    7.70    0.70
  -4 -10  -1   47.90   16.90
  -4 -10  -1    7.60    0.60
   4 -10   1    6.40    0.70
   4  10  -1    5.10    2.80
  -4  10   1    8.30    8.80
  -4  10   1    4.80    2.90
  -4  10   1    6.90    2.00
  -4  10  -1    8.10    2.20
   4  10   1    7.70    0.70
   4  10   1    2.40    2.10
  -4  10  -1    3.30    2.30
  -4 -10   1    6.40    0.50
  -4 -10   1    8.10   13.10
   4 -10  -1    8.40    0.70
  -4  10  -1   -1.40    8.40
   5  10  -1  135.99    5.40
  -5  10   1  145.09    9.80
  -5 -10  -1  134.29    6.10
  -5  10   1  134.59   24.90
   5  10  -1  136.59   10.80
   5 -10   1  130.89    5.40
  -5 -10  -1  112.99   42.30
  -5  10   1  137.09    8.30
  -5  10  -1  138.79    9.00
   5  10   1  137.39   10.50
  -5  10  -1  123.49   26.00
   5  10   1  138.39    5.40
  -5 -10   1  175.58   49.50
   5 -10  -1  135.39    5.40
  -5  10  -1  130.19    8.10
  -5 -10   1  138.59    6.30
   6  10  -1   53.19    2.40
   6 -10   1   49.50    2.30
  -6  10   1   32.50   26.30
  -6  10   1   53.09    5.50
  -6 -10  -1   54.99    3.10
  -6  10   1   52.69    4.80
  -6 -10  -1   66.09   20.00
   6 -10  -1   50.29    2.30
  -6  10  -1   47.30    4.70
  -6  10  -1   55.89    5.20
   6  10   1   55.49    2.40
  -6  10  -1   38.50   28.70
  -6 -10   1   23.70   20.10
  -6 -10   1   52.19    3.10
  -7  10   1  143.99    9.10
   7 -10   1  129.49    5.40
  -7  10   1  142.29   11.30
  -7 -10  -1  142.69    6.30
   7  10  -1  138.19    5.50
  -7  10  -1  132.49   10.00
  -7  10  -1  139.69    8.50
   7  10   1  139.89    5.50
  -7 -10   1  148.59    6.80
  -7 -10   1  147.49   36.10
   7 -10  -1  131.59    5.40
   8  10  -1   76.69    3.20
  -8  10   1   76.09    5.70
  -8 -10  -1   79.59    3.90
  -8  10   1   80.09    6.20
  -8  10  -1   78.29    5.60
  -8 -10   1   80.69    4.00
   8  10   1   78.99    3.20
  -9  10   1    3.20    1.40
   9  10  -1    4.40    0.40
  -9  10   1    2.90    1.60
  -9 -10  -1    3.90    0.80
  -9  10  -1    3.90    1.60
   9  10   1    4.20    0.40
  -9 -10   1    3.60    0.80
 -10  10   1    6.80    1.70
 -10 -10  -1    6.20    0.90
 -10 -10   1    6.50    0.90
 -10  10  -1    6.90    1.60
   0 -11  -1   -0.10    0.20
   0 -11   1   -0.10    0.20
   0  11  -1    6.40    4.40
   0  11   1   -0.10    0.30
   0  11  -1    0.10    0.30
   0  11   1   -0.10    5.20
   1 -11   1   86.69    3.50
  -1  11   1   84.49   14.80
  -1 -11  -1   36.70   25.10
   1  11  -1   84.49    3.50
  -1 -11  -1   85.09    3.50
   1  11   1   84.79    3.50
  -1 -11   1   85.79    3.50
  -1 -11   1  108.89   32.90
  -1  11  -1   89.09    3.70
   1  11   1   84.79   12.30
   1  11   1   77.59    6.60
  -1  11  -1   67.09   12.70
   1 -11  -1   84.39    3.50
  -2 -11  -1   11.60   23.40
  -2  11   1    6.30    5.70
   2  11  -1   -0.60    3.60
   2  11   1    0.60    3.50
  -2 -11   1   32.60   27.30
  -2  11  -1   -0.60    4.90
   3 -11   1    0.60    0.30
  -3 -11  -1    7.60   16.20
   3  11  -1    0.30    0.30
  -3  11   1   -0.10    2.00
  -3  11   1    2.70    8.30
  -3 -11  -1    0.80    0.30
   3  11  -1    3.20    2.40
  -3  11  -1  -10.30    6.50
   3  11   1    3.60    2.50
   3  11   1    0.80    0.30
  -3  11  -1    2.00    2.10
  -3 -11   1    0.20    0.30
   3 -11  -1    0.30    0.30
  -3 -11   1  -18.30   17.10
  -4 -11  -1    9.90    1.30
  -4  11   1   10.80    2.60
  -4  11   1   29.30   11.40
   4  11  -1    8.20    3.60
   4 -11   1   10.20    0.80
  -4 -11  -1  -15.60   17.50
  -4  11   1    5.20    2.40
   4  11  -1   11.20    0.80
  -4 -11  -1    9.70    0.60
  -4  11  -1    7.70    2.20
  -4  11  -1   19.00   11.90
  -4  11  -1    8.90    2.90
   4  11   1    9.90    0.80
  -4 -11   1  -25.70   16.40
  -4 -11   1    8.50    0.60
   4 -11  -1   10.20    0.80
   4  11   1   12.80    3.20
  -5 -11  -1  -19.80   17.00
   5  11  -1   -0.50    3.00
  -5  11   1    1.20    1.70
  -5  11   1    0.30    1.50
  -5 -11  -1    0.40    0.60
  -5  11   1    0.90   15.10
   5  11  -1   -0.10    0.30
   5 -11   1    0.00    0.20
  -5  11  -1   -1.20    1.50
  -5 -11   1  -10.60   19.80
   5  11   1    3.10    3.30
  -5 -11   1   -0.20    0.60
   5  11   1   -0.10    0.30
   5 -11  -1   -0.10    0.20
  -5  11  -1   -0.30    1.50
  -6 -11  -1  214.48   61.49
   6 -11   1  153.88    6.10
  -6  11   1  156.98    8.90
  -6 -11  -1  161.68    6.90
  -6  11   1  150.78    9.70
   6  11  -1  157.98    6.10
  -6 -11   1  244.38   49.99
   6  11   1  164.58    6.20
  -6 -11   1  161.48    7.00
  -6  11  -1  139.49    8.60
   6 -11  -1  152.28    6.10
  -7  11   1   38.10    4.10
  -7  11   1   36.00    3.90
  -7 -11  -1   36.40    2.30
   7 -11   1   36.40    1.70
   7  11  -1   37.30    1.70
   7  11   1   38.10    1.70
  -7 -11   1   35.00    2.40
  -7  11  -1   31.90    3.80
   7 -11  -1   35.30    1.60
  -8  11   1    7.20    1.90
   8  11  -1   10.70    0.70
  -8 -11  -1    9.50    1.10
  -8  11   1    8.80    1.90
  -8  11  -1    6.50    1.80
  -8 -11   1    9.20    1.20
   8  11   1   10.80    0.70
  -9  11   1    7.60    1.70
   9  11  -1    6.50    0.70
  -9 -11  -1    6.00    0.80
  -9 -11   1    7.10    0.90
   9  11   1    6.00    0.60
  -9  11  -1    6.80    1.70
 -10 -11  -1    6.00    0.60
 -10  11   1    5.10    1.30
 -10  11  -1    5.60    1.20
 -10 -11   1    5.70    0.70
   0 -12  -1  382.56   14.50
   0 -12   1  385.86   14.60
   0  12  -1  386.96   14.50
   0  12   1  395.56   14.50
   0  12   1  403.16   34.10
   0  12  -1  362.06   31.70
  -1  12   1    7.00    0.60
   1  12  -1    5.80    5.20
  -1  12   1   -2.80    5.60
   1  12  -1    8.00    0.70
   1 -12   1    7.00    0.70
  -1 -12  -1    6.40    0.60
  -1  12  -1    7.00    0.60
   1  12   1    7.60    0.70
   1 -12  -1    7.40    0.70
  -1 -12   1    7.10    0.70
   1  12   1    6.80    4.70
   2 -12   1   64.19    2.80
  -2  12   1   79.29   17.70
  -2 -12  -1   68.79    2.80
   2  12  -1   65.69    2.80
  -2 -12  -1   65.09   36.40
  -2  12  -1   61.09    5.80
  -2  12  -1   58.19    2.60
  -2 -12   1   68.59    2.80
  -2 -12   1   53.59   30.90
   2  12   1   73.69   12.70
   2 -12  -1   65.59    2.80
  -2  12  -1   55.89   14.70
   2  12   1   66.69    2.80
  -3  12   1    3.80    2.40
  -3 -12  -1   -1.40   26.40
   3  12  -1    6.10    0.70
   3  12  -1    6.50    6.20
  -3  12   1    4.70    2.00
  -3  12   1    0.00    9.20
  -3 -12  -1    5.40    0.50
   3 -12   1    5.30    0.60
  -3 -12   1    6.30    0.50
  -3  12  -1   -5.60   10.10
   3  12   1    4.40    3.80
  -3 -12   1   -2.80   27.50
  -3  12  -1    2.00    2.00
   3 -12  -1    5.30    0.60
   3  12   1    4.90    0.60
   4  12  -1    5.80    0.70
  -4  12   1    3.20    2.20
  -4 -12  -1    6.90    0.50
  -4  12   1    6.60    2.30
   4 -12   1    6.00    0.70
  -4 -12  -1   21.50   30.80
  -4 -12   1   83.99   38.70
   4 -12  -1    6.70    0.70
  -4  12  -1    2.40    1.70
  -4 -12   1    6.40    0.50
   4  12   1    5.80    0.70
  -4 -12   1    7.00    1.60
  -5 -12  -1    2.70    0.80
  -5  12   1    5.50    2.10
   5 -12   1    2.60    0.40
   5  12  -1    2.90    0.40
  -5  12   1    1.00    1.60
  -5 -12   1    3.80    0.90
   5  12   1    2.90    0.40
   5 -12  -1    3.40    0.40
  -5  12  -1    4.90    1.90
  -6  12   1   32.00    3.70
  -6 -12  -1   39.40    2.30
   6 -12   1   38.80    1.70
  -6  12   1   32.80    3.80
   6  12  -1   39.40    1.80
   6  12   1   38.90    1.80
  -6  12  -1   31.00    3.60
  -6 -12   1   41.50    2.40
   6 -12  -1   39.30    1.70
   7 -12   1   14.90    0.80
  -7  12   1   10.50    2.40
   7  12  -1   15.80    0.90
  -7 -12  -1   16.90    1.60
  -7  12   1   16.60    2.70
   7  12   1   15.90    0.90
  -7  12  -1   14.30    2.40
   7 -12  -1   15.60    0.80
  -7 -12   1   17.10    1.50
  -8 -12  -1    2.90    0.60
   8 -12   1    2.80    0.40
  -8  12   1    2.60    1.40
   8  12  -1    3.50    0.40
   8  12   1    4.00    0.40
  -8  12  -1    3.10    1.40
  -8 -12   1    4.30    0.80
  -9  12   1    3.30    1.20
  -9 -12  -1    3.90    0.50
   9  12  -1    4.50    0.30
  -9  12  -1    3.90    1.10
  -9 -12   1    4.80    0.80
   0  13   1    0.30    0.40
   0 -13   1    0.10    0.30
   0 -13  -1    0.20    0.30
   1  13   1    1.50    0.50
   1 -13  -1    0.90    0.40
  -1  13  -1   -2.00    1.40
  -1  13  -1    1.10    0.30
   2 -13   1    0.90    0.30
  -2 -13  -1    1.10    0.30
   2  13  -1    1.10    0.30
  -2  13   1    0.00    1.60
   2  13   1    0.80    0.30
  -2 -13   1    1.00    0.30
   2 -13  -1    1.10    0.30
  -3 -13  -1    4.30    0.90
  -3 -13  -1    5.40    0.50
   3 -13   1    5.50    0.60
  -3  13   1    7.50    2.10
   3  13  -1    5.20    0.60
  -3  13   1    3.40    1.90
  -3 -13   1    5.10    0.50
  -3  13  -1    4.80    1.80
   3  13   1    5.20    0.60
   3 -13  -1    5.20    0.60
  -4 -13  -1   56.89    2.90
  -4  13   1   47.80    4.70
  -4  13   1   55.39    4.70
   4 -13   1   57.29    2.40
   4  13  -1   54.59    2.40
   4 -13  -1   54.39    2.40
   4  13   1   55.89    2.40
  -4 -13   1   54.29    3.00
  -4  13  -1   58.59    4.70
  -5  13   1    1.80    1.50
   5  13  -1    3.90    0.50
  -5  13   1    2.50    1.60
   5 -13   1    3.70    0.50
  -5 -13  -1    4.80    0.80
   5 -13  -1    4.00    0.50
  -5 -13   1    2.90    0.80
  -5  13  -1    3.60    1.70
   5  13   1    4.70    0.50
   6 -13   1   10.30    0.60
   6  13  -1    9.80    0.70
  -6  13   1   11.70    2.30
  -6 -13  -1    8.70    0.90
  -6  13   1    5.00    2.40
   6  13   1    9.90    0.70
   6 -13  -1    9.80    0.60
  -6  13  -1    6.70    1.70
  -6 -13   1   10.40    1.90
   7  13  -1   22.70    1.10
  -7 -13  -1   21.80    1.30
   7 -13   1   22.00    1.00
  -7  13   1   22.10    2.70
   7 -13  -1   24.50    1.10
  -7 -13   1   22.50    1.50
   7  13   1   23.40    1.10
  -7  13  -1   21.40    2.60
   8  13  -1  202.68    7.60
  -8  13   1  199.78    9.00
  -8  13  -1  199.08    8.90
  -8 -13   1  208.48    7.90
   0  14  -1   32.80    1.50
   0 -14  -1   33.20    1.50
   0 -14   1   34.20    1.60
  -1 -14  -1    2.40    0.40
   1 -14   1    2.10    0.40
  -1  14   1    2.30    1.70
   1  14  -1    2.70    0.40
   1  14   1    2.20    0.30
  -1 -14   1    2.60    0.40
   1 -14  -1    2.10    0.40
   2  14  -1   37.40    1.70
  -2 -14  -1   38.30    1.60
  -2  14   1   39.30    3.80
  -2 -14  -1   35.20    2.10
   2 -14   1   36.20    1.70
  -2 -14   1   39.10    1.60
  -2  14  -1   40.30    3.80
   2  14   1   36.60    1.70
   2 -14  -1   39.00    1.70
  -3  14   1   34.10    3.50
   3  14  -1   27.60    1.30
  -3 -14  -1   29.00    1.30
   3 -14   1   27.90    1.40
  -3  14  -1   26.90    3.20
   3  14   1   27.90    1.30
  -3 -14   1   27.00    1.80
  -3 -14   1   27.70    1.20
   3 -14  -1   28.70    1.40
   4  14  -1    0.50    0.30
   4 -14   1    0.90    0.30
  -4  14   1    0.90    1.30
  -4  14   1    2.10    1.90
  -4 -14  -1    0.00    0.40
  -4 -14   1    1.00    0.90
   4  14   1    0.90    0.30
  -4  14  -1    0.30    1.30
   4 -14  -1    0.80    0.30
  -5 -14  -1    1.60    0.50
   5 -14   1    2.10    0.30
   5  14  -1    2.00    0.60
  -5  14   1    1.70    1.60
   5 -14  -1    2.00    0.30
  -5 -14   1    1.50    0.50
  -5  14  -1    0.50    1.50
  -6  14   1   15.90    2.20
  -6 -14  -1   15.20    1.00
   6 -14   1   16.60    0.80
   6  14  -1   16.00    0.80
   6 -14  -1   15.90    0.80
  -6 -14   1   16.20    1.10
   6  14   1   16.30    0.80
  -6  14  -1   16.30    2.20
   7  14  -1   25.40    1.10
  -7  14   1   24.00    2.20
   7 -14   1   23.20    1.10
  -7  14  -1   26.80    3.50
   7 -14  -1   21.90    1.00
  -7 -14   1   22.90    1.20
   0 -15  -1    2.20    0.50
   0  15   1    1.20    1.30
   1  15  -1   12.00    0.60
  -1 -15  -1   12.60    0.70
   1 -15   1   13.00    0.70
  -1 -15  -1    9.20    1.10
  -1  15   1   11.80    2.10
  -1  15   1    7.50    2.20
  -1 -15   1   12.90    0.70
  -1  15  -1   13.10    2.20
   1 -15  -1   12.80    0.70
   2 -15   1    9.30    0.80
  -2 -15  -1   11.10    1.10
   2  15  -1    9.90    0.60
  -2  15   1    7.90    2.70
  -2 -15  -1   10.30    0.50
  -2 -15   1   10.10    0.60
  -2 -15   1   10.00    0.90
   2 -15  -1   11.60    0.90
  -2  15  -1    4.60    2.10
  -3 -15  -1    0.40    0.40
  -3  15   1   -0.30    1.10
   3  15  -1    0.10    0.20
   3 -15   1    0.00    0.20
   3  15   1    0.00    0.20
  -3 -15   1    0.20    0.60
   3 -15  -1    0.20    0.20
  -3  15  -1    0.50    1.20
   4  15  -1    2.80    0.40
  -4  15   1    2.60    1.20
   4 -15   1    3.20    0.40
  -4  15  -1    1.00    1.10
   4 -15  -1    3.30    0.40
   4  15   1    2.90    0.40
  -4 -15   1    3.70    0.80
  -5  15   1    3.70    1.30
   5  15  -1    4.30    0.40
   5 -15   1    4.00    0.30
  -5  15  -1    3.90    1.20
   5 -15  -1    4.00    0.30
  -5 -15   1    4.00    0.60
   0 -16  -1   16.50    0.80
   0 -16   1   16.80    0.80
   0  16  -1   15.80    2.10
   0  16   1   17.10    2.10
  -1 -16  -1    0.70    0.20
  -1  16   1    0.00    0.90
  -1  16  -1    0.80    0.90
  -1 -16   1    1.10    0.20
   1  16   1    0.50    1.20
   2 -16   1   49.99    2.10
  -2  16   1   52.49    3.50
   2 -16  -1   52.19    2.10
  -2  16  -1   48.60    3.30
  -3  16   1   -0.40    0.80
   3 -16   1    0.30    0.20
   3 -16  -1    0.20    0.20
  -3  16  -1   -0.20    0.80
   0   0  -2 9471.25  357.66
   0   0  -2 9999.00  361.86
  -1   0   2   35.00    3.60
   1   0   2   33.00    1.80
  -1   0   2   28.70    4.00
  -1   0  -2   35.60    4.30
   1   0   2   35.30    2.00
  -2   0   2 1403.86   56.99
   2   0   2 1449.06   52.49
  -2   0  -2 1451.05   57.49
  -2   0  -2 1454.95   53.19
  -2   0   2 1380.66   56.09
   2   0   2 1270.97   54.29
  -3   0  -2   25.30    3.20
  -3   0   2   34.00    5.10
  -3   0  -2   28.70    4.40
   3   0   2   29.00    2.40
  -4   0   2   44.60    6.20
  -4   0  -2   46.10    4.60
  -4   0  -2   43.00    4.50
   4   0   2   40.70    3.40
   5   0   2  113.99    8.10
  -5   0  -2  120.59    8.90
  -5   0   2  123.49   11.40
  -6   0  -2    1.20    2.10
  -6   0   2    0.80    2.70
   6   0   2    1.10    1.10
  -7   0   2   50.09    4.60
   7   0   2   53.09    4.80
  -7   0   2   46.80    2.70
  -7   0  -2   48.80    2.70
  -7   0  -2   47.00    2.80
  -7   0  -2   55.39    5.10
  -7   0   2   48.20    2.70
  -7   0  -2   49.80    3.10
  -7   0   2   50.89    3.80
  -7   0   2   45.80    2.90
  -7   0   2   40.50    7.80
  -7   0   2   50.79    3.30
  -7   0  -2   49.00    2.60
  -8   0   2  319.77   13.60
  -8   0   2  341.97   13.30
  -8   0  -2  337.97   14.50
  -8   0   2  329.37   14.10
  -8   0   2  325.07   14.60
   8   0  -2  303.47   18.40
  -8   0   2  312.87   23.00
  -8   0  -2  346.87   15.80
  -8   0  -2  329.37   13.30
  -8   0  -2  348.47   13.90
   8   0   2  346.37   17.00
  -8   0  -2  330.17   13.20
  -8   0  -2  335.67   13.40
  -8   0   2  323.97   13.30
  -8   0   2  347.47   16.50
  -9   0  -2   16.10    1.70
  -9   0   2   20.80    3.10
  -9   0   2   16.30    1.80
  -9   0  -2   18.30    1.60
  -9   0  -2   18.50    1.60
   9   0  -2   12.20    3.80
  -9   0   2   20.30    2.30
  -9   0   2   15.40    1.60
  -9   0   2   18.00    3.50
  -9   0  -2   20.30    3.20
  -9   0  -2   16.90    2.00
  -9   0   2   17.20    1.60
 -10   0   2  102.59    7.50
 -10   0  -2   97.69    5.80
 -10   0  -2  107.99    5.40
 -10   0   2  101.59    5.30
 -10   0  -2  102.19    4.90
 -10   0   2  101.59    5.00
 -10   0  -2  104.09    4.90
 -10   0  -2  109.29    6.90
 -10   0   2  105.39    5.70
 -10   0   2  103.69    5.00
 -10   0   2  108.99    6.50
 -10   0  -2  104.39    5.00
 -11   0  -2    7.00    1.10
 -11   0   2    4.70    0.90
 -11   0   2    7.70    1.10
 -11   0  -2    7.10    1.70
 -11   0  -2    6.60    1.10
 -11   0   2    6.00    1.90
 -11   0   2    7.80    2.30
 -11   0   2    5.70    1.20
 -11   0  -2    7.10    1.10
 -11   0   2    5.80    1.00
 -12   0   2   11.70    1.30
 -12   0   2   11.70    1.30
 -12   0  -2   10.40    1.10
 -12   0   2   12.50    1.20
 -12   0   2   10.40    2.20
 -12   0  -2   11.20    1.10
 -12   0   2   11.20    1.50
 -13   0   2    0.60    0.40
 -13   0  -2    0.30    0.30
 -13   0   2    0.40    0.40
   0   1   2    0.30    0.20
   0   1  -2   -0.10    0.60
   0  -1  -2    3.20    1.60
   0   1   2    0.70    0.60
   0   1  -2    0.30    1.60
  -1   1   2  501.85   22.50
  -1  -1  -2  491.85   24.20
   1  -1   2  486.85   18.80
  -1   1   2  520.55   20.00
   1   1  -2  492.05   24.10
  -1   1   2  474.05   23.30
  -1  -1   2  515.65   21.10
  -1   1  -2  455.75   18.70
  -1   1  -2  530.45   19.40
   1   1   2  501.65   19.30
  -1   1  -2  508.85   24.00
  -2   1   2 1454.95   61.49
   2  -1   2 1467.45   55.19
  -2  -1  -2 1511.65   61.69
  -2   1   2 1428.36   59.19
  -2   1  -2 1523.95   58.09
  -2  -1   2 1527.75   61.59
  -2  -1   2 1513.05   59.29
  -2   1  -2 1528.25   60.79
   2   1   2 1484.35   56.39
  -3   1   2  155.18   12.40
  -3  -1  -2  172.18   11.90
   3  -1   2  163.88    7.20
  -3   1  -2  161.68   10.00
  -3   1  -2  161.28   10.40
  -3  -1   2  168.18   11.10
  -3  -1   2  168.38   11.40
   3   1   2  163.78    8.20
  -4  -1  -2  135.49   10.90
  -4  -1  -2  135.19   10.50
  -4   1   2  141.69   12.50
   4  -1   2  142.39    6.90
  -4  -1   2  141.29    9.60
  -4   1  -2  147.99    8.60
  -4  -1   2  147.19   11.00
  -4   1  -2  141.29   10.00
   4   1   2  140.59    7.90
   5  -1   2  199.28    9.80
  -5   1   2  217.38   16.70
  -5  -1  -2  203.48   11.60
  -5  -1  -2  217.28   12.40
  -5   1  -2  214.38   13.90
   5   1   2  202.48   11.00
  -5  -1   2  206.38   14.60
   6  -1   2   44.10    3.80
  -6   1   2   47.50    7.80
   6   1   2   41.00    4.30
  -6   1  -2   43.70    6.20
  -6  -1   2   40.10    6.80
  -7  -1  -2  280.87   13.40
  -7  -1  -2  286.37   11.60
  -7   1   2  289.77   22.50
  -7   1   2  276.47   11.40
  -7  -1  -2  285.17   11.50
  -7   1   2  294.07   14.50
  -7   1   2  286.67   12.80
  -7   1   2  278.77   11.40
  -7  -1  -2  282.87   11.40
  -7  -1  -2  287.57   11.90
   7  -1   2  286.77   13.60
  -7   1   2  275.57   11.80
  -7   1   2  283.37   12.30
  -7   1  -2  289.07   11.40
   7   1   2  305.07   15.50
  -7   1  -2  285.07   11.60
  -7   1  -2  287.37   11.40
  -7   1  -2  305.47   18.80
  -7  -1   2  292.97   19.70
  -7   1  -2  285.27   12.00
  -7  -1   2  279.47   12.50
  -7  -1   2  273.97   11.80
  -7  -1   2  305.47   14.20
  -7  -1   2  287.77   11.50
  -7  -1   2  282.97   12.20
  -7  -1   2  280.57   11.50
  -8  -1  -2  301.57   14.00
  -8   1   2  280.67   13.20
  -8   1   2  290.77   12.70
  -8  -1  -2  295.57   12.70
  -8   1   2  294.97   11.70
  -8   1   2  300.07   22.90
  -8   1   2  288.67   12.10
  -8   1   2  289.87   11.80
  -8   1   2  308.17   15.20
  -8  -1  -2  287.17   11.70
  -8  -1  -2  290.87   12.30
   8   1  -2  272.27   17.50
  -8  -1  -2  290.27   11.80
  -8  -1  -2  288.37   11.90
   8  -1   2  275.97   13.80
  -8   1  -2  286.67   11.80
  -8  -1   2  277.97   11.80
  -8  -1   2  304.77   14.70
   8   1   2  292.87   15.90
  -8   1  -2  295.07   11.70
  -8   1  -2  313.67   14.50
  -8   1  -2  288.57   11.70
  -8  -1   2  288.57   13.00
  -8  -1   2  281.47   12.10
  -8  -1   2  294.77   11.90
  -8  -1   2  291.77   12.60
  -8   1  -2  292.77   12.30
  -8   1  -2  287.97   13.00
  -9  -1  -2  109.29    5.20
  -9   1   2  116.19    8.20
  -9   1   2  117.99    6.20
  -9  -1  -2  114.69    7.30
  -9   1   2  115.39    5.60
  -9  -1  -2  113.49    5.70
   9   1  -2   97.19    9.70
  -9   1   2  106.29    6.70
  -9  -1  -2  118.49    7.20
  -9  -1  -2  115.69    5.30
  -9   1   2  113.39    5.20
  -9   1   2  115.99    5.30
  -9  -1  -2  109.79    5.40
  -9  -1   2  115.29    7.70
  -9  -1   2  114.49    6.10
  -9  -1   2  111.29    5.30
  -9   1  -2  117.59    5.40
  -9   1  -2  108.39    6.60
  -9  -1   2  103.29    5.50
  -9   1  -2  109.99    5.10
   9   1   2  116.49    8.70
  -9   1  -2  114.79    5.20
  -9   1  -2  117.09    7.50
  -9  -1   2  111.49    6.50
  -9   1  -2  113.29    5.80
  -9  -1   2  109.59    5.30
 -10  -1  -2  136.79    7.20
 -10  -1  -2  143.39    6.40
 -10  -1  -2  140.39    6.50
 -10  -1  -2  140.09    6.50
 -10   1   2  146.99    6.80
 -10   1   2  143.79    7.30
 -10   1   2  148.19    9.50
 -10  -1  -2  151.38    8.40
 -10   1   2  150.78    6.50
 -10  -1  -2  145.39    6.90
 -10   1   2  145.49    8.10
 -10   1   2  148.69    6.50
 -10  -1   2  147.69    6.60
 -10   1  -2  143.59    6.40
 -10  -1   2  147.49    7.60
 -10   1  -2  151.38    8.70
 -10   1  -2  145.19    6.90
 -10  -1   2  142.99    6.60
 -10   1  -2  138.59    7.70
 -10   1  -2  148.79    6.40
 -10   1  -2  148.79    6.60
 -10  -1   2  140.99    6.80
 -10  -1   2  147.49    9.00
 -10  -1   2  141.89    7.20
 -11  -1  -2   40.00    2.50
 -11   1   2   42.20    4.50
 -11   1   2   40.40    3.10
 -11   1   2   42.30    2.50
 -11   1   2   39.30    2.70
 -11   1   2   42.40    4.00
 -11   1   2   41.10    2.50
 -11  -1  -2   41.40    2.50
 -11   1  -2   40.90    2.40
 -11  -1   2   41.10    2.60
 -11   1  -2   40.40    2.40
 -11  -1   2   42.60    3.70
 -11   1  -2   43.60    3.90
 -11  -1   2   41.50    3.10
 -11   1  -2   42.80    2.80
 -11   1  -2   39.10    3.40
 -11   1  -2   43.40    2.50
 -11  -1   2   42.00    2.60
 -11  -1   2   41.60    2.70
 -11  -1   2   39.80    4.10
 -12   1   2    4.10    1.60
 -12  -1  -2    3.20    0.70
 -12  -1  -2    4.00    0.80
 -12   1   2    2.90    0.60
 -12   1   2    2.90    0.70
 -12   1   2    3.60    1.00
 -12   1   2    4.60    1.60
 -12   1   2    3.30    0.70
 -12  -1   2    3.80    0.80
 -12   1  -2    2.20    0.60
 -12  -1   2    3.30    0.70
 -12  -1   2    3.10    0.90
 -12  -1   2    2.50    0.60
 -13  -1  -2   11.40    0.90
 -13  -1   2   13.10    1.00
 -13  -1   2   11.60    0.90
   0   2  -2   75.99    7.70
   0   2   2   76.09    3.70
   0  -2  -2   84.29    8.00
  -1  -2  -2 1927.81   78.59
   1   2  -2 1905.01   78.89
  -1   2   2 1884.01   74.49
  -1   2   2 1980.10   70.89
   1  -2  -2 1871.61   78.19
   1   2   2 1946.61   71.19
  -1   2  -2 1881.21   77.39
  -1   2  -2 1825.62   70.19
  -2   2   2  284.47   16.90
  -2   2   2  267.87   16.20
  -2  -2  -2  285.37   17.90
  -2   2   2  264.77   12.50
  -2   2  -2  276.77   13.90
  -2   2  -2  280.67   16.50
   2   2   2  273.97   12.20
  -2  -2   2  273.47   18.00
   3  -2   2   70.09    3.10
  -3  -2  -2   70.19    8.50
  -3   2   2   84.79    9.00
  -3   2  -2   75.39    7.10
  -3  -2   2   76.39    6.40
  -3  -2   2   78.89    8.70
  -3   2  -2   74.29    7.20
   3   2   2   71.49    4.90
  -4  -2  -2   17.90    5.30
   4  -2   2   15.00    1.20
  -4   2   2   13.10    4.70
  -4  -2  -2   11.40    4.20
  -4   2  -2   14.60    3.40
   4   2   2   17.10    2.30
  -4  -2   2   19.70    4.30
  -4   2  -2   17.70    4.70
  -4  -2   2   17.50    5.10
   5  -2   2  536.05   21.80
  -5  -2  -2  548.95   29.70
  -5   2   2  578.04   33.40
  -5  -2  -2  557.04   28.90
  -5   2  -2  578.44   29.50
  -5  -2   2  553.84   26.80
   5   2   2  564.44   24.90
  -5  -2   2  567.34   28.20
  -6  -2  -2  174.08   10.00
  -6   2   2  162.48   16.20
  -6  -2  -2  171.58    9.50
   6  -2   2  157.28    7.70
  -6   2  -2  170.98   14.00
   6   2   2  177.58   10.70
  -7   2   2   27.20    2.50
  -7   2   2   24.80    2.60
  -7   2   2   21.70    6.90
  -7   2   2   27.30    1.90
  -7  -2  -2   26.10    2.00
  -7   2   2   32.60    4.10
  -7  -2  -2   28.00    1.90
  -7  -2  -2   30.10    3.00
  -7   2   2   23.80    1.70
  -7  -2  -2   26.10    1.80
  -7  -2  -2   27.60    1.90
  -7  -2  -2   24.60    2.60
  -7   2   2   28.60    2.10
   7  -2   2   24.70    2.40
  -7  -2   2   26.80    1.90
   7   2   2   26.10    4.60
  -7  -2   2   26.60    2.20
  -7   2  -2   26.00    2.80
  -7  -2   2   25.90    3.20
  -7   2  -2   25.80    1.90
  -7   2  -2   26.10    3.60
  -7  -2   2   25.20    1.90
  -7   2  -2   26.90    2.20
  -7   2  -2   25.60    1.70
  -7  -2   2   26.20    2.00
  -7   2  -2   23.30    1.70
  -7   2  -2   36.40    7.10
  -7  -2   2   26.20    2.50
  -8  -2  -2  147.09    7.10
  -8   2   2  153.18    9.60
   8   2  -2  146.49   11.90
  -8   2   2  144.89    7.30
  -8  -2  -2  144.29    6.40
  -8  -2  -2  144.69    6.90
  -8  -2  -2  142.09    6.50
  -8   2   2  145.39    6.80
  -8   2   2  145.29    8.00
  -8   2   2  142.19   16.50
  -8   2   2  151.08    6.40
  -8  -2  -2  150.68    6.60
  -8   2   2  146.19    6.40
  -8  -2  -2  157.88    8.30
  -8   2  -2  141.69    6.30
  -8  -2   2  141.09    6.50
  -8   2  -2  146.19   12.80
   8   2   2  144.69   10.60
  -8   2  -2  150.88    6.60
  -8  -2   2  145.89    7.50
  -8  -2   2  139.49    6.70
  -8   2  -2  148.99    6.30
  -8   2  -2  147.59    7.00
  -8   2  -2  160.08    9.10
  -8   2  -2  147.69    7.90
  -8  -2   2  153.58    8.80
  -8  -2   2  146.19    6.60
  -8  -2   2  142.39    7.20
  -9   2   2   24.40    8.20
  -9  -2  -2   27.40    2.10
  -9   2   2   27.00    2.30
  -9   2   2   25.20    1.90
  -9   2   2   29.20    4.40
  -9  -2  -2   27.40    2.30
   9   2  -2   21.10    5.70
  -9   2   2   27.50    2.00
  -9  -2  -2   26.60    2.00
  -9  -2  -2   27.70    3.30
  -9  -2  -2   28.90    2.20
  -9   2   2   27.30    3.50
  -9  -2  -2   28.80    2.80
  -9   2   2   24.60    2.60
  -9  -2   2   27.00    2.30
  -9  -2   2   27.50    3.20
  -9  -2   2   30.00    3.90
  -9  -2   2   26.20    2.10
  -9  -2   2   25.20    2.10
  -9   2  -2   27.70    2.10
  -9   2  -2   29.00    1.90
   9   2   2   18.90    4.20
  -9   2  -2   23.40    3.10
  -9   2  -2   28.20    2.00
  -9   2  -2   27.90    2.40
  -9   2  -2   29.40    3.80
  -9  -2   2   28.90    2.60
 -10  -2  -2   -0.20    0.50
 -10   2   2    0.00    0.60
 -10   2   2   -0.20    1.30
 -10   2   2    0.20    0.60
 -10  -2  -2    0.00    0.50
 -10   2   2   -0.30    0.50
 -10   2   2    0.40    1.60
 -10  -2  -2    0.20    0.70
 -10   2   2    0.30    0.90
  10   2  -2   -4.90    6.10
 -10  -2  -2   -0.50    0.50
 -10  -2   2   -0.20    1.30
 -10  -2   2    0.30    0.50
 -10  -2   2    0.10    0.70
 -10  -2   2    0.40    1.50
 -10   2  -2    0.10    0.50
 -10   2  -2    0.40    0.50
 -10   2  -2    0.10    0.50
 -10   2  -2   -0.30    1.20
 -10   2  -2    1.50    0.80
 -10   2  -2    0.00    1.50
 -10  -2   2   -0.20    0.60
 -10  -2   2   -0.20    0.70
 -11  -2  -2   31.00    2.10
 -11   2   2   31.80    4.10
 -11   2   2   29.10    3.60
 -11   2   2   32.60    2.30
 -11   2   2   30.90    2.00
 -11  -2  -2   30.10    2.00
 -11   2   2   32.50    2.70
 -11   2   2   31.40    2.10
 -11  -2  -2   28.20    2.10
 -11  -2   2   31.70    2.30
 -11   2  -2   33.90    2.40
 -11  -2   2   29.50    2.30
 -11   2  -2   32.90    2.10
 -11   2  -2   32.80    3.20
 -11  -2   2   34.90    2.30
 -11   2  -2   34.60    3.40
 -11  -2   2   31.10    2.60
 -12   2   2   91.99    5.30
 -12   2   2   95.29    4.10
 -12   2   2  100.59    4.20
 -12  -2  -2   96.89    4.20
 -12   2   2   94.39    4.70
 -12   2   2   88.69    6.00
 -12   2   2   99.49    4.40
 -12  -2  -2   93.49    4.30
 -12  -2   2   95.49    4.40
 -12   2  -2   94.19    4.10
 -12  -2   2   95.19    4.40
 -12  -2   2   93.99    4.40
 -13  -2  -2    0.00    0.30
 -13  -2   2    0.30    0.40
 -13  -2   2    0.30    0.40
   0   3  -2   -0.20    1.80
   0  -3  -2   -0.10    2.10
  -1   3   2  884.61   32.60
   1   3  -2  874.61   42.60
  -1   3   2  882.71   36.90
  -1   3  -2  744.33   32.70
  -1   3  -2  879.31   41.30
   1   3   2  898.41   33.50
  -2   3   2   16.50    2.10
   2   3  -2   21.00    5.60
  -2   3   2   17.20    4.60
  -2  -3  -2   21.60    6.20
   2   3   2   15.90    2.10
  -2   3  -2   14.50    2.90
  -2   3  -2   18.20    5.10
  -3  -3  -2   15.70    5.60
  -3   3   2   15.10    5.20
  -3  -3  -2   13.40    6.00
   3   3   2   15.30    2.30
  -3  -3   2    9.30    5.70
  -3   3  -2   15.90    4.80
  -3   3  -2   21.90    4.00
  -4  -3  -2 2061.89   87.59
  -4   3   2 1979.20   87.19
  -4  -3  -2 1934.21   87.19
   4   3   2 1929.11   76.79
  -4   3  -2 1999.70   83.29
  -4  -3   2 1995.70   86.99
  -5   3   2   97.49   12.50
  -5  -3  -2   92.29   11.40
  -5  -3  -2  115.69   12.90
  -5  -3   2  105.79   11.10
   5   3   2  110.89    7.70
  -5   3  -2   92.59   10.50
  -5  -3   2   91.29   12.00
  -6  -3  -2    0.20    3.50
  -6   3   2   -2.70    3.70
  -6  -3   2    4.70    3.10
  -6   3  -2    0.90    3.30
  -6  -3   2    2.60    4.20
  -7   3   2    4.90    0.90
  -7  -3  -2    7.80    1.50
  -7  -3  -2    5.20    1.00
  -7  -3  -2    4.50    1.30
  -7   3   2    8.80    1.90
  -7   3   2    3.50    0.70
  -7  -3  -2    5.80    1.00
  -7   3   2    4.00    1.20
  -7   3   2    6.00    2.40
  -7   3   2    3.00    5.30
  -7   3   2    4.80    0.80
  -7  -3  -2    3.70    1.10
  -7   3  -2    3.60    0.80
  -7   3  -2    4.20    0.70
  -7   3  -2    4.50    1.00
  -7  -3   2    5.20    1.60
  -7  -3   2    4.90    1.30
  -7   3  -2    4.30    1.60
   7   3   2    3.00    2.10
  -7  -3   2    4.90    0.90
  -7   3  -2    3.80    0.90
  -7   3  -2    3.60    1.80
  -7  -3   2    2.70    0.70
  -8  -3  -2   -0.20    0.50
  -8  -3  -2   -0.30    0.40
  -8   3   2   -2.50    1.10
  -8  -3  -2   -0.70    0.50
  -8   3   2    0.30    0.60
  -8   3   2   -0.50    0.40
  -8   3   2    0.40    0.80
  -8   3   2    0.40    0.50
   8   3  -2    2.40    2.10
  -8  -3  -2    0.50    0.50
  -8   3   2    0.90    1.50
  -8   3  -2    1.30    0.60
  -8   3  -2   -0.40    0.40
  -8   3  -2   -0.20    0.50
  -8   3  -2   -5.60    4.50
  -8   3  -2   -1.10    1.20
  -8  -3   2    1.10    0.60
   8   3   2    1.70    1.80
  -8  -3   2    0.60    1.20
  -8  -3   2   -0.70    0.60
  -8  -3   2    0.50    0.70
  -8  -3   2    0.00    1.00
  -8   3  -2    0.40    0.40
  -8   3  -2    0.90    1.40
  -8  -3   2   -0.20    0.50
  -9  -3  -2   17.60    1.70
  -9   3   2   18.40    2.30
  -9   3   2   19.30    4.00
  -9   3   2   16.20    7.80
  -9  -3  -2   20.10    2.00
  -9  -3  -2   17.90    1.70
   9   3  -2   20.90    4.60
  -9   3   2   21.70    1.90
  -9   3   2   18.10    1.60
  -9   3   2   18.70    3.20
  -9   3   2   20.70    1.60
  -9  -3  -2   19.20    1.70
  -9   3  -2   20.90    1.60
  -9  -3   2   17.20    1.80
  -9  -3   2   16.30    3.10
  -9  -3   2   19.10    1.90
  -9   3  -2   18.60    1.70
   9   3   2   14.80    3.80
  -9   3  -2   18.20    2.00
  -9   3  -2   22.00    3.10
  -9   3  -2   16.70    1.50
  -9  -3   2   17.30    2.10
  -9   3  -2   18.80    3.30
  -9  -3   2   16.80    1.70
 -10  -3  -2   41.20    2.60
 -10   3   2   43.00    3.30
 -10  -3  -2   41.10    2.60
 -10   3   2   39.20    4.10
 -10   3   2   42.70    5.10
 -10   3   2   46.50    2.50
 -10  -3  -2   41.70    2.50
 -10   3   2   18.70   10.10
 -10   3   2   43.20    2.50
 -10   3   2   43.20    2.80
 -10   3  -2   42.30    2.40
 -10   3  -2   43.00    2.90
 -10  -3   2   42.80    2.80
 -10  -3   2   43.60    4.20
 -10  -3   2   44.60    3.10
  10   3   2   29.70    5.60
 -10  -3   2   37.20    2.70
 -10   3  -2   42.30    2.40
 -10   3  -2   45.20    2.60
 -10  -3   2   42.10    2.80
 -10   3  -2   43.80    4.30
 -10   3  -2   40.80    3.90
 -11  -3  -2   29.40    2.10
 -11  -3  -2   29.50    1.90
 -11   3   2   30.40    3.50
 -11   3   2   31.00    1.90
 -11   3   2   30.10    4.00
 -11   3   2   28.90    2.50
 -11   3   2   29.00    1.90
 -11  -3  -2   27.80    2.00
 -11   3   2   30.20    2.10
 -11   3  -2   27.70    1.80
 -11   3  -2   28.90    3.30
 -11  -3   2   28.20    2.10
 -11  -3   2   29.50    2.10
 -11   3  -2   30.30    3.30
 -11  -3   2   31.80    2.20
 -11  -3   2   29.30    2.30
 -12   3   2    0.80    1.30
 -12  -3  -2    1.00    0.50
 -12  -3  -2    0.80    0.50
 -12   3   2    0.50    0.50
 -12   3   2    0.00    0.60
 -12   3   2    0.30    1.20
 -12  -3   2    1.00    0.50
 -12  -3   2    0.70    0.50
 -12  -3   2    0.20    0.50
 -12   3  -2    2.20    1.20
 -13  -3  -2    4.40    0.90
 -13  -3   2    4.20    0.80
 -13  -3   2    3.50    0.80
   0   4  -2 1139.99   54.79
   0  -4  -2 1123.89   55.49
   0   4   2 1119.69   42.90
   1   4  -2  221.38   18.50
  -1  -4  -2  217.78   18.50
  -1   4   2  222.48    9.40
  -1   4   2  236.28   13.80
   1  -4  -2  211.58   18.40
  -1   4  -2  223.98   17.70
   1   4   2  226.98   10.40
  -1   4  -2  220.88    9.40
   2   4  -2  631.34   38.20
  -2  -4  -2  653.73   37.40
  -2   4   2  644.84   26.30
  -2   4   2  636.94   32.40
  -2   4  -2  676.63   36.00
   2   4   2  671.63   27.10
  -2   4  -2  657.53   30.10
  -3   4   2  272.07   19.60
  -3  -4  -2  286.17   22.00
   3   4   2  272.37   13.60
  -3  -4   2  278.77   23.00
  -3   4  -2  287.57   20.30
  -3   4  -2  279.37   17.80
  -4  -4  -2    4.10    6.80
  -4   4   2   -1.30    2.40
  -4  -4  -2    9.60    5.70
  -4   4  -2    3.20    2.50
  -4  -4   2   -1.00    6.90
   4   4   2    5.70    1.90
  -5  -4  -2  179.08   20.00
  -5  -4  -2  200.58   18.40
  -5   4   2  198.88   20.00
   5   4   2  188.58   11.50
  -5   4  -2  194.38   17.10
  -5  -4   2  176.48   20.00
  -5  -4   2  203.58   18.00
  -6   4   2  154.28   20.00
  -6  -4  -2  142.69   21.60
  -6  -4  -2  150.98   15.50
  -6   4   2  130.59    7.30
  -6  -4   2  128.19   13.50
   6   4   2  153.58   10.40
  -6  -4   2  166.58   25.50
  -6  -4   2  132.79    6.30
  -6   4  -2  152.68    6.10
  -6   4  -2  147.89   15.50
  -7   4   2    6.50    0.90
   7   4  -2    8.20    2.90
  -7  -4  -2    4.30    4.20
  -7   4   2    6.30    2.20
  -7  -4  -2    6.80    1.00
  -7  -4  -2    6.60    1.00
  -7   4   2   10.00    1.70
  -7   4   2    9.20    2.10
  -7  -4  -2    6.40    1.10
  -7   4   2    2.80    5.10
  -7  -4  -2   11.20    5.30
  -7  -4  -2    7.50    1.10
  -7   4  -2    8.20    1.90
  -7   4  -2    9.70    1.40
  -7  -4   2    7.60    1.30
  -7   4  -2    7.90    0.90
  -7  -4   2    8.80    1.10
  -7  -4   2    7.10    1.10
  -7  -4   2   10.00    1.20
  -7  -4   2    8.30    1.90
  -7   4  -2    4.50    4.90
  -7   4  -2    8.80    0.90
   7   4   2    6.60    2.40
  -7   4  -2    7.70    2.40
  -8  -4  -2   53.99    3.20
  -8  -4  -2   49.30    3.00
  -8   4   2   54.69    2.80
  -8   4   2   54.69    3.20
  -8   4   2   56.29    5.80
  -8  -4  -2   51.39    3.00
  -8   4   2   54.09    4.60
  -8   4   2   55.09   12.10
  -8  -4  -2   50.39    2.90
  -8   4   2   54.59    2.80
   8   4  -2   42.90    7.20
  -8   4   2   54.29    3.70
  -8   4  -2   56.39    3.40
  -8   4  -2   55.19    2.80
  -8   4  -2   55.49    4.40
  -8  -4   2   52.79    3.10
  -8   4  -2   54.39    2.90
  -8  -4   2   58.09    4.60
  -8  -4   2   52.89    3.40
   8   4   2   57.99    6.40
  -8   4  -2   51.79    2.70
  -8  -4   2   48.80    3.20
  -8   4  -2   57.89    5.30
  -8  -4   2   50.19    3.00
  -9   4   2  113.89    8.50
  -9   4   2  109.89    4.80
   9   4  -2   89.69    9.80
  -9   4   2  109.89    5.30
  -9   4   2  108.09   17.10
  -9   4   2  109.59    4.90
  -9  -4  -2  108.69    5.20
  -9   4   2  105.89    6.90
  -9  -4  -2  104.49    5.00
  -9  -4  -2  107.19    5.10
  -9   4   2  111.59    6.00
  -9   4  -2  108.59    4.80
  -9   4  -2  113.29    5.50
  -9  -4   2  107.89    5.30
  -9  -4   2  109.89    5.60
  -9   4  -2  107.59    5.00
  -9   4  -2  119.09    7.70
  -9  -4   2  103.39    5.30
  -9   4  -2  106.39    6.70
  -9  -4   2  108.99    5.20
   9   4   2  106.69    9.60
  -9   4  -2  106.99    4.80
 -10  -4  -2   11.80    1.30
 -10  -4  -2   13.20    1.30
 -10   4   2   14.00    1.50
 -10   4   2    9.30    2.30
 -10   4   2   13.30    1.30
 -10   4   2   11.00    1.80
 -10  -4  -2   11.50    1.40
 -10   4   2   11.20    1.20
 -10   4   2   12.00    3.00
 -10   4  -2   12.80    1.20
 -10   4  -2   10.40    2.40
 -10  -4   2   12.30    1.50
 -10   4  -2   13.10    1.50
 -10  -4   2   12.90    1.60
 -10   4  -2   12.00    2.50
 -10  -4   2   12.00    1.60
 -10  -4   2    9.60    1.40
 -11  -4  -2   17.20    1.50
 -11  -4  -2   16.30    1.40
 -11   4   2   23.50    3.30
 -11   4   2   17.60    1.50
 -11   4   2   16.50    1.30
 -11   4   2   19.30    3.40
 -11   4   2   17.70    1.90
 -11  -4   2   17.60    1.60
 -11   4  -2   16.00    2.50
 -11   4  -2   14.70    2.30
 -11  -4   2   14.40    1.50
 -12  -4  -2   24.10    2.00
 -12  -4  -2   27.50    1.60
 -12   4   2   28.10    1.90
 -12   4   2   26.50    3.00
 -12   4   2   19.40    3.30
 -12  -4   2   30.00    2.60
 -12  -4   2   22.50    1.70
 -12  -4   2   29.80    1.80
 -12   4  -2   29.20    2.50
 -13  -4  -2    8.00    0.70
 -13  -4   2    8.80    0.80
 -13  -4   2    8.10    0.70
   0   5  -2   -0.30    2.50
   0   5   2    0.00    0.50
  -1   5   2  521.65   20.40
   1   5  -2  513.95   34.10
  -1   5   2  496.75   25.90
  -1  -5  -2  517.25   34.20
   1   5   2  535.05   21.60
  -1   5  -2  516.95   32.70
  -1   5  -2  509.65   20.30
   1  -5  -2  491.15   34.10
  -2  -5  -2  132.79   15.20
  -2   5   2  133.09   11.90
   2   5  -2  117.49   16.00
  -2   5   2  136.19    7.00
   2   5   2  127.89    7.60
  -2   5  -2  132.09   14.30
  -2   5  -2  121.39   10.00
  -3   5   2 2281.67   97.89
  -3  -5  -2 2314.07  103.19
   3   5   2 2220.98   87.29
  -3   5  -2 2277.57   94.69
  -3   5  -2 2255.57  100.29
  -4  -5  -2   -1.80   13.70
  -4  -5  -2    2.60    4.90
  -4   5   2   -0.40    2.50
  -4  -5   2    1.60    5.60
  -4  -5   2   18.70   12.40
   4   5   2    2.00    1.20
  -4   5  -2    1.50    2.20
  -5   5   2   -0.90    4.60
  -5  -5  -2    1.90    4.30
  -5  -5   2    1.30    4.70
  -5   5  -2    4.30    4.10
   5   5   2    3.90    2.00
  -5  -5   2  -10.50   11.70
  -6   5   2   -4.30    3.80
  -6  -5  -2   -0.80    0.50
  -6   5   2    0.60    0.40
  -6  -5  -2   -2.40    4.60
  -6  -5  -2    2.10   11.30
  -6   5  -2   12.50    5.70
  -6  -5   2    0.00    4.50
   6   5   2    0.10    1.40
  -6   5  -2   -0.10    0.30
  -6   5  -2    0.80    1.20
  -6   5  -2   -0.10    0.50
  -6  -5   2    5.60   11.60
  -7   5   2   10.60    1.80
  -7  -5  -2   12.00    1.20
  -7   5   2    6.50    7.30
  -7   5   2   11.90    2.90
  -7   5   2    9.10    2.20
  -7  -5  -2   17.10    8.40
  -7   5   2   14.70    1.20
  -7  -5  -2   10.40    1.20
  -7  -5  -2    9.10    1.30
  -7   5   2    9.40    1.30
  -7  -5  -2   10.50    9.90
  -7   5   2   12.80    1.10
   7   5   2   10.00    3.30
  -7   5  -2   13.50    2.70
  -7   5  -2   11.80    1.10
  -7  -5   2   12.20    1.40
  -7  -5   2   12.40    1.40
  -7  -5   2   12.50    1.30
  -7  -5   2   14.20   10.30
  -7   5  -2   24.40    8.20
  -7   5  -2   16.30    2.80
  -7   5  -2   12.50    1.10
  -7   5  -2   12.00    2.80
  -7  -5   2    9.60    6.40
  -7  -5   2   11.80    1.40
  -8  -5  -2  111.49    5.50
  -8   5   2  116.69    5.10
   8   5  -2  122.19   11.40
  -8   5   2  114.89    7.30
  -8   5   2  113.19    5.50
  -8   5   2  122.69    5.50
  -8   5   2  104.89    8.10
  -8   5   2  126.19    9.00
  -8   5  -2  122.19    5.20
  -8   5  -2  124.99    5.80
   8   5   2  112.49    9.90
  -8   5  -2  131.59    8.30
  -8  -5   2  110.69    5.50
  -8   5  -2   97.49    7.90
  -8   5  -2   89.99   16.90
  -8  -5   2  108.69    5.50
  -8  -5   2  123.19    6.60
  -8   5  -2  115.79    5.00
  -9  -5  -2   16.70    1.50
  -9   5   2   18.90    2.20
  -9   5   2   16.10    1.50
  -9  -5  -2   15.70    1.70
  -9   5   2   18.80    3.30
  -9   5   2   -1.40   10.10
   9   5  -2   15.60    5.20
  -9  -5  -2   14.90    1.50
  -9   5   2   15.80    1.30
  -9   5   2   17.00    3.70
  -9   5  -2   17.00    1.70
  -9   5  -2   15.60    2.80
   9   5   2   11.90    3.70
  -9  -5   2   16.90    1.70
  -9  -5   2   16.00    1.60
  -9  -5   2   16.50    1.70
  -9  -5   2   17.40    1.80
  -9   5  -2   18.00    3.20
 -10   5   2    2.70    0.70
 -10  -5  -2    3.00    0.80
 -10  -5  -2    3.00    0.70
 -10   5   2    3.10    1.10
 -10   5   2    2.50    1.70
 -10   5   2    4.30    2.20
 -10  -5  -2    3.90    0.80
 -10  -5   2    2.00    0.80
 -10  -5   2    3.30    0.80
 -10  -5   2    3.40    0.90
 -10   5  -2    3.80    0.90
 -10   5  -2    5.10    1.60
 -10   5  -2    2.80    1.50
 -11  -5  -2    1.10    0.60
 -11  -5  -2    0.80    0.50
 -11   5   2    1.00    1.40
 -11   5   2    0.90    0.70
 -11   5   2    0.70    1.50
 -11   5   2    0.60    0.50
 -11  -5   2    1.10    0.70
 -11  -5   2    0.70    0.60
 -11  -5   2    1.00    0.50
 -11   5  -2    0.70    1.30
 -11   5  -2    0.80    0.90
 -12   5   2   12.30    1.40
 -12  -5  -2   11.80    0.90
 -12   5   2   10.10    1.90
 -12   5   2   10.20    2.10
 -12  -5  -2   12.40    1.10
 -12  -5   2   12.10    1.10
 -12  -5   2   10.90    1.10
 -12   5  -2   11.80    1.80
 -13   5   2    1.90    0.90
 -13  -5  -2    2.20    0.40
 -13  -5   2    1.60    0.40
 -13  -5   2    1.50    0.30
   0   6  -2 1440.66   54.69
   0   6   2 1453.15   53.89
   0  -6  -2 1331.27   72.19
   0   6  -2 1372.26   71.99
  -1  -6  -2   84.89   13.60
  -1   6   2   96.69    5.10
  -1   6   2   93.89    9.50
   1   6  -2   87.79   14.40
   1   6  -2   95.29    6.50
   1   6   2   98.09    6.00
  -1   6  -2   97.39   13.50
  -1   6  -2   95.09    4.90
   1  -6  -2   93.89   15.10
  -2  -6  -2  400.06   31.50
  -2   6   2  388.26   25.40
  -2   6   2  413.76   17.90
   2  -6  -2  400.46   36.20
   2   6   2  415.86   18.90
  -2   6  -2  443.46   32.20
  -2   6  -2  423.96   23.80
  -3   6   2   77.49   11.40
  -3  -6  -2   83.39   12.70
  -3   6  -2   80.79   10.00
   3   6   2   83.79    6.30
  -4   6   2    4.90    3.80
  -4  -6  -2    4.10    6.20
   4   6   2    7.00    2.10
  -4  -6   2    4.90    6.40
  -4   6  -2    4.70    3.80
  -5   6   2   69.69    4.70
  -5   6   2   48.40   11.60
   5   6  -2   69.09    7.30
  -5  -6  -2   66.29   13.50
  -5   6   2   73.79    6.40
  -5  -6   2   73.09   13.70
  -5   6  -2   73.09   12.30
   5   6   2   72.99    6.60
  -5   6  -2   67.19    4.70
  -5  -6   2   62.39    3.40
  -6  -6  -2   16.70    1.40
  -6  -6  -2   11.60    1.20
  -6   6   2   17.30    3.40
  -6   6   2   14.40    1.90
  -6   6   2   19.80    2.50
  -6  -6  -2   16.60    1.30
   6   6  -2   19.60    4.90
  -6   6   2   13.10    7.30
  -6  -6  -2   27.30   10.20
  -6   6  -2   14.60    3.10
  -6  -6   2   21.30    8.70
  -6  -6   2   14.90    1.40
  -6  -6   2   16.40    1.60
   6   6   2   15.10    0.90
  -6   6  -2   28.10    8.40
  -6  -6   2   15.20    1.40
   6   6   2   15.80    3.70
  -6   6  -2   15.50    2.70
  -6  -6   2   15.10    1.40
  -7  -6  -2   36.20    2.20
  -7   6   2   36.50    1.90
  -7   6   2   39.80    2.30
  -7   6   2   38.80   12.50
   7   6  -2   31.70    1.70
  -7  -6  -2   37.50    2.40
  -7   6   2   38.20    3.00
  -7  -6  -2   34.70    2.10
  -7   6   2   39.40    4.90
  -7   6   2   35.80    3.80
   7   6  -2   37.80    6.00
  -7  -6  -2   15.50   10.70
  -7   6  -2   36.10    4.30
  -7  -6   2   36.90    2.30
  -7  -6   2   34.00    2.30
  -7   6  -2   21.50   10.30
  -7  -6   2   25.60   28.10
   7   6   2   36.50    1.70
  -7  -6   2   19.80    8.50
   7   6   2   29.00    5.10
  -7  -6   2   32.70    2.30
  -7  -6   2   36.90    2.50
  -7   6  -2   32.90    3.70
  -8   6   2   80.69    7.30
   8   6  -2   86.99    9.50
  -8  -6  -2   81.99    4.20
  -8   6   2   83.09    4.00
  -8  -6  -2   83.19    4.00
  -8  -6  -2   76.79    3.80
  -8   6   2   79.69    6.10
  -8   6   2   90.69    4.90
  -8   6   2   61.09   15.80
   8   6   2   80.69    8.20
  -8   6  -2   88.49    4.50
  -8  -6   2   77.89    4.30
  -8   6  -2   88.69    6.70
  -8  -6   2   79.39    4.10
  -8   6  -2   83.49    6.00
  -8  -6   2   80.29    4.20
  -8  -6   2   80.99    4.20
  -9  -6  -2    0.70    0.60
  -9   6   2   -0.40    1.50
  -9   6   2   -0.80    1.50
  -9  -6  -2    0.60    0.50
  -9   6   2   -0.20    0.40
  -9  -6  -2    0.20    0.40
  -9   6   2  -11.90   10.90
  -9   6   2   -0.10    0.60
   9   6  -2   -3.90    2.60
  -9   6  -2   -1.40    1.10
  -9  -6   2   -0.60    0.40
  -9  -6   2    0.30    0.70
  -9   6  -2   -0.90    0.40
  -9  -6   2    1.00    0.60
   9   6   2    6.90    3.60
  -9   6  -2   -0.40    1.40
 -10  -6  -2    4.90    1.00
 -10   6   2    6.40    2.40
 -10  -6  -2    4.00    0.80
 -10   6   2    7.30    2.30
 -10   6   2    4.70    0.70
 -10   6   2    4.80    1.00
 -10  -6   2    4.20    0.90
 -10   6  -2    5.00    1.80
 -10  -6   2    5.90    1.20
 -10  -6   2    3.80    0.80
 -10   6  -2    3.80    1.50
 -11   6   2   17.30    2.90
 -11  -6  -2   16.40    1.40
 -11  -6  -2   16.10    1.50
 -11   6   2   18.60    1.50
 -11   6   2   13.90    2.30
 -11   6  -2   15.00    2.30
 -11  -6   2   16.20    1.60
 -11   6  -2   14.60    2.00
 -11  -6   2   16.80    1.60
 -11  -6   2   16.50    1.40
 -12   6   2   12.10    1.80
 -12   6   2   10.40    1.70
 -12  -6  -2   12.40    1.00
 -12  -6   2   14.10    1.20
 -12  -6   2   12.30    1.10
 -12   6  -2   12.30    1.70
   0   7   2   -0.60    0.50
   0  -7  -2   -2.60    8.50
   0   7  -2    0.30    0.90
   1   7  -2  522.35   23.20
  -1   7   2  528.05   21.10
  -1   7   2  521.25   29.50
  -1  -7  -2  493.45   38.80
   1  -7  -2  478.05   45.70
   1   7   2  538.05   22.40
  -1   7  -2  488.25   20.40
   2   7  -2   10.40    2.70
  -2   7   2    8.50    4.60
  -2  -7  -2    8.10    6.10
  -2   7   2    7.70    1.90
  -2   7  -2   10.20    3.50
   2   7   2    7.20    1.90
   2  -7  -2   25.80   21.40
  -3  -7  -2   84.49   15.80
   3   7  -2  103.19    8.30
  -3   7   2   90.99   13.10
  -3   7  -2  120.39   13.30
   3   7   2  103.89    7.70
  -3  -7   2  104.49   17.50
   4   7  -2  156.78   11.50
  -4   7   2  159.68   19.00
  -4  -7  -2  173.98   22.00
  -4   7   2  159.98    8.30
  -4   7  -2  156.68   17.90
   4   7   2  165.48   10.70
  -4  -7   2  196.98   23.60
   5   7  -2    6.00    2.20
  -5   7   2   10.40    7.60
  -5   7   2    6.00    2.40
   5   7  -2    5.60    0.50
  -5   7   2    4.30    1.50
  -5   7  -2   10.90    6.40
  -5  -7   2   -3.00    6.20
  -5  -7   2    6.40    0.90
   5   7   2    4.20    2.20
   5   7   2    6.20    0.60
  -5   7  -2    5.50    1.80
  -6   7   2   65.49    4.90
   6   7  -2   70.89    8.00
  -6  -7  -2   78.49   18.70
   6   7  -2   58.79    2.80
  -6   7   2   87.59   16.80
  -6   7   2   79.29    6.70
  -6  -7  -2   62.79    3.40
  -6   7   2   64.29    4.10
  -6  -7  -2   64.09    3.50
   6   7   2   66.79    6.70
  -6   7  -2   71.79    5.10
  -6  -7   2   69.39    3.50
  -6  -7   2   64.89    3.60
   6   7   2   65.09    2.80
  -6   7  -2   66.59    5.80
  -6  -7   2   50.59   14.20
  -6   7  -2   45.00   12.20
  -7  -7  -2  283.77   28.50
  -7   7   2  301.37   12.10
  -7   7   2  300.67   15.70
  -7  -7  -2  266.17   11.00
   7   7  -2  263.37   10.50
  -7  -7  -2  279.57   11.40
  -7   7   2  266.27   31.90
  -7   7   2  272.27   13.40
   7   7  -2  280.77   18.60
  -7  -7   2  255.87   11.10
  -7  -7   2  287.87   27.50
   7   7   2  286.47   17.20
  -7   7  -2  270.67   13.20
   7   7   2  267.77   10.50
  -7   7  -2  293.27   14.40
  -7  -7   2  269.07   11.50
  -7   7  -2  248.38   27.60
  -7  -7   2  272.17   11.50
  -8  -7  -2   20.50    9.40
  -8  -7  -2   10.40    8.40
  -8   7   2    8.90   11.00
   8   7   2    7.60    2.80
  -9   7   2    1.30    2.30
  -9  -7  -2   -0.20    0.40
  -9   7   2    1.30    2.30
  -9   7   2    0.40    0.70
  -9  -7   2   -0.70    0.40
  -9  -7   2    1.60    1.10
  -9   7  -2   -0.70    1.10
 -10   7   2  199.38   11.10
 -10  -7  -2  194.88   11.10
 -10   7   2  183.58   10.00
 -10   7   2  197.78    8.30
 -10  -7  -2  193.58    8.20
 -10  -7   2  190.68    8.10
 -10  -7   2  190.48    7.80
 -10   7  -2  207.88    9.80
 -10  -7   2  192.98    8.40
 -10   7  -2  193.98    9.50
 -11   7   2    7.40    1.90
 -11   7   2    7.80    1.90
 -11  -7  -2    6.10    0.80
 -11  -7  -2    9.60    1.20
 -11  -7   2    7.80    0.90
 -11  -7   2    6.20    1.00
 -11   7  -2    8.40    1.70
 -12   7   2    4.80    1.00
 -12  -7  -2    7.90    0.70
 -12   7   2    4.60    1.20
 -12  -7   2    7.00    0.60
 -12  -7   2    6.90    0.80
 -12   7  -2    7.00    1.10
   0   8  -2  777.12   31.20
   0  -8   2  692.03   53.59
   0   8   2  788.22   30.90
   0  -8  -2  744.53   52.79
  -1  -8  -2   42.20   13.10
  -1   8   2   24.90    2.60
   1  -8   2   37.60   17.00
   1   8  -2   21.60    3.20
  -1   8   2   13.50    4.10
   1  -8  -2   27.80   13.90
  -1  -8   2   48.70   13.10
   1   8   2   24.50    2.90
  -1   8  -2   22.00    2.20
  -2   8   2  113.19    8.60
   2   8  -2  128.79    8.80
   2   8  -2  114.69    4.70
  -2   8   2  141.09   15.50
  -2  -8  -2   98.39   19.80
  -2   8  -2  114.69   12.90
  -2  -8   2  153.28   22.20
   2   8   2  127.89    8.10
   2   8   2  115.99    4.70
   3   8  -2   23.20    1.20
  -3  -8  -2   30.20   10.90
  -3  -8  -2   22.90    1.10
  -3   8   2   25.60    8.40
   3   8  -2   25.80    4.10
  -3  -8   2   24.20   11.70
  -3  -8   2   23.10    1.20
   3   8   2   22.80    1.20
  -3   8  -2   31.30    8.20
   3   8   2   26.40    3.80
   4   8  -2   78.89    3.20
  -4   8   2   62.19   14.60
   4   8  -2   85.09    7.90
  -4  -8  -2   75.99    3.10
  -4   8   2   82.39    7.10
  -4   8   2   74.79    5.20
  -4  -8   2   83.49   33.40
  -4  -8   2   80.69    4.80
   4   8   2   80.79    3.20
   4   8   2   85.39    7.20
   4  -8  -2   70.19    3.20
  -4   8  -2   79.49   14.20
  -5   8   2  314.27   14.40
  -5  -8  -2  333.27   33.90
  -5   8   2  299.47   31.90
  -5   8   2  344.07   17.00
  -5  -8  -2  301.17   12.30
   5   8  -2  300.27   11.70
   5   8  -2  326.97   19.00
  -5  -8   2  336.47   35.30
   5   8   2  312.47   11.70
   5  -8  -2  272.57   11.70
  -5   8  -2  333.97   31.00
   5   8   2  309.17   17.40
  -5  -8   2  282.27   12.20
  -5   8  -2  339.87   16.60
  -5   8  -2  284.77   14.00
   6  -8   2   42.80    2.20
   6   8  -2   50.29    2.20
  -6   8   2   53.29    7.10
  -6  -8  -2   55.09    3.50
  -6   8   2   46.50   20.00
   6   8  -2   55.99    7.00
  -6  -8  -2   78.49   25.30
  -6   8   2   43.90    4.50
  -6  -8   2   49.50    2.80
  -6   8  -2   56.09   13.90
  -6  -8   2   50.89    3.10
   6   8   2   54.29    6.20
   6   8   2   50.09    2.20
  -6   8  -2   51.49    5.10
  -6  -8   2   56.89   21.30
  -7   8   2   36.80   14.20
  -7  -8  -2   59.49    3.30
  -7  -8  -2   51.09    2.90
   7   8  -2   71.99    8.20
   7   8  -2   58.39    2.60
  -7  -8  -2   19.30   17.40
  -7   8   2   66.69    6.50
  -7   8   2   57.79    5.10
  -7  -8   2   59.79    3.50
   7   8   2   56.89    2.50
  -7   8  -2   45.90   18.30
  -7   8  -2   63.69    5.60
  -7  -8   2   48.50   18.40
  -7   8  -2   58.99    5.10
   7   8   2   61.79    6.80
  -7  -8   2   60.39    3.20
   8   8  -2   30.80    1.50
  -8   8   2   30.70    4.60
   8   8  -2   19.70    5.80
  -8  -8  -2   29.60    1.80
  -8  -8  -2   -2.60   23.30
  -8  -8  -2    9.20   13.90
  -8   8   2   28.10    3.90
  -8   8   2   46.20   17.70
  -8  -8  -2   33.00    2.20
  -8   8  -2   33.40    3.90
   8   8   2   26.20    5.40
  -8  -8   2   33.00    2.40
  -8   8  -2   34.30    3.80
   8   8   2   30.70    1.50
  -8  -8   2   29.80    2.00
  -8  -8   2   33.00    2.10
  -9  -8  -2    3.70    0.60
  -9   8   2    6.40    2.30
  -9  -8  -2    7.00    1.10
   9   8  -2    4.20    0.50
  -9   8   2    3.80    1.80
  -9   8  -2    5.10    1.80
  -9  -8   2    4.70    0.90
  -9  -8   2    5.60    1.20
  -9   8  -2    3.00    1.30
 -10  -8  -2    8.50    1.10
 -10   8   2    8.10    2.20
 -10   8   2    4.40    1.90
 -10  -8  -2    7.40    0.70
 -10  -8   2    6.70    1.20
 -10   8  -2    8.20    2.10
 -10  -8   2    6.30    0.90
 -11   8   2    0.30    1.00
 -11  -8  -2    1.40    0.50
 -11   8   2    1.20    1.20
 -11   8  -2    1.10    1.20
 -11  -8   2    1.60    0.40
 -11  -8   2    1.10    0.50
   0  -9   2    6.20   14.20
   0  -9   2    0.20    0.20
   0   9  -2    0.90    1.30
   0   9   2    0.10    1.00
   0   9  -2    0.30    0.30
   0  -9  -2    0.00    0.20
   0  -9  -2   -5.70   13.30
   0   9   2   -1.50    2.00
  -1   9   2  114.89    4.70
   1  -9   2  110.79   28.70
   1   9  -2  112.89    8.00
  -1  -9  -2  158.68   24.00
  -1   9   2  119.09   14.30
  -1  -9  -2  120.39    4.70
   1  -9   2  119.69    4.80
  -1   9   2  122.99    7.40
   1   9  -2  121.59    4.70
  -1   9  -2  131.89   13.60
  -1  -9   2   97.19   19.90
  -1   9  -2  119.29    4.80
   1   9   2  122.59    9.80
   1   9   2  120.09    4.70
  -1  -9   2  123.59    4.80
   1  -9  -2  117.79    4.70
  -2  -9  -2   81.99    3.20
  -2  -9  -2  100.49   19.50
   2   9  -2   81.09    3.30
   2  -9   2   77.09    3.30
  -2   9   2   86.29   13.30
   2   9  -2   79.59    7.00
  -2   9   2   74.19    3.20
   2  -9  -2   79.59    3.30
  -2   9  -2   89.09   12.30
  -2  -9   2   80.29    3.30
  -2  -9   2  104.49   24.00
   2   9   2   86.89    6.50
  -2   9  -2   77.39    3.20
   2   9   2   75.89    3.20
   3  -9   2    0.40    0.20
  -3  -9  -2    0.60    0.20
   3   9  -2    0.00    1.70
   3   9  -2    0.00    0.20
  -3   9   2    3.00    3.70
  -3  -9  -2   -4.30   20.50
   3  -9  -2    0.80    0.30
  -3   9  -2    2.90    4.60
   3   9   2    0.90    0.30
  -3   9  -2    1.10    2.20
  -3  -9   2    0.60    0.20
   3   9   2    4.10    1.80
  -3  -9   2  -11.60    9.70
   4  -9   2  438.76   17.10
  -4  -9  -2  447.16   17.70
  -4   9   2  499.25   22.70
  -4  -9  -2  452.65   16.90
  -4   9   2  462.75   19.70
  -4   9   2  435.56   37.80
   4   9  -2  442.96   17.00
  -4  -9  -2  515.15   45.10
   4   9  -2  477.95   24.10
   4   9   2  467.95   22.70
   4   9   2  449.66   17.00
  -4   9  -2  427.06   19.60
  -4   9  -2  468.25   43.00
  -4   9  -2  511.85   21.70
  -4  -9   2  407.66   17.50
  -4  -9   2  447.26   16.90
  -4  -9   2  464.55   44.70
   4  -9  -2  439.36   17.00
  -5   9   2  192.08   28.00
  -5   9   2  221.88   11.30
  -5   9   2  242.78   15.80
  -5  -9  -2  220.68    9.30
   5   9  -2  224.68   15.60
   5  -9   2  215.28    8.50
  -5   9  -2  214.88   11.40
   5  -9  -2  218.98    8.50
  -5  -9   2  227.68    9.40
  -5   9  -2  223.58   12.10
   5   9   2  222.98   14.00
  -5  -9   2  212.38    9.00
  -5   9  -2  202.58   27.90
  -6   9   2  417.36   41.30
   6  -9   2  406.86   16.20
  -6   9   2  424.66   19.20
  -6  -9  -2  434.86   17.00
  -6   9   2  471.15   21.70
   6   9  -2  439.66   24.30
   6   9  -2  447.76   16.20
   6   9   2  393.66   22.30
  -6  -9   2  445.76   17.20
  -6   9  -2  421.56   19.20
  -6   9  -2  404.06   40.30
  -6   9  -2  450.95   20.10
  -6  -9   2  421.06   16.80
   6  -9  -2  421.16   16.10
   6   9   2  440.06   16.20
  -7   9   2    0.30    1.90
  -7  -9  -2    1.90    0.70
  -7   9   2    3.00    1.80
  -7  -9  -2   -6.30   14.30
   7   9  -2   -4.40    3.80
  -7   9   2  -14.40   12.80
   7  -9   2   -0.30    0.20
   7   9  -2   -0.20    0.20
  -7  -9   2    0.60    0.50
   7   9   2    0.40    0.30
   7   9   2    6.20    3.00
  -7  -9   2   10.90   12.50
  -7  -9   2    1.00    0.60
  -7   9  -2    0.80    1.50
  -7   9  -2   -1.50    1.30
  -8   9   2    1.20    1.50
  -8  -9  -2   -0.20    0.50
  -8  -9  -2  -10.20   15.20
   8   9  -2   -0.10    0.30
  -8   9   2    0.10    1.70
  -8  -9   2   -0.20    0.40
  -8   9  -2   -1.00    1.20
   8   9   2    0.40    0.30
  -8  -9   2    0.00    0.60
  -8   9  -2    0.20    1.30
  -9   9   2    1.00    1.40
  -9  -9  -2    0.60    0.60
  -9   9   2    2.10    1.60
   9   9  -2    1.10    0.30
  -9   9  -2    2.40    1.50
   9   9   2    1.00    0.30
  -9  -9   2    1.10    0.70
  -9  -9   2    0.20    0.40
 -10  -9  -2   39.70    2.20
 -10   9   2   39.70    3.70
 -10   9   2   39.10    4.30
  10   9  -2   39.10    1.70
 -10  -9   2   35.40    2.40
 -10  -9   2   39.10    2.70
 -10   9  -2   43.30    3.30
 -11   9   2    2.30    1.10
 -11  -9  -2    2.40    0.40
 -11   9   2    1.60    0.90
 -11   9  -2    1.70    0.90
 -11  -9   2    1.60    0.60
   0  10   2    1.00    0.30
   0  10   2   -1.40    3.80
   0 -10   2   33.90   21.50
   0  10   2    0.70    1.70
   0 -10  -2  -29.00   20.30
   0 -10   2    0.70    0.30
   0  10  -2    0.80    0.30
   0 -10  -2    1.20    0.30
   1  10  -2  148.29    9.30
  -1 -10  -2  147.69    5.80
  -1 -10  -2  153.58   31.20
   1 -10   2  142.49    5.80
  -1  10   2  146.99   17.80
  -1  10   2  147.99    5.70
   1  10  -2  150.68    5.80
  -1 -10   2  151.58    5.80
  -1  10  -2  150.38    5.70
  -1 -10   2  150.18   30.50
  -1  10  -2  119.49   15.40
   1  10   2  146.99    5.80
   1 -10  -2  146.89    5.80
   1  10   2  153.48    9.20
  -2 -10  -2    3.10    0.40
  -2  10   2   -1.50    3.40
  -2  10   2    3.30    0.40
   2 -10   2    4.40    0.50
   2  10  -2    4.40    0.50
  -2 -10  -2   17.10   16.20
  -2  10  -2    4.60    0.50
   2 -10  -2    4.10    0.50
   2  10   2    3.50    0.40
  -2 -10   2  -12.80   11.50
  -2  10  -2    3.60    4.10
  -2 -10   2    4.00    0.50
   3 -10   2   15.90    1.00
  -3 -10  -2   19.70    1.00
  -3  10   2   23.90    8.90
  -3 -10  -2   15.80   17.40
   3  10  -2   12.30    3.40
   3 -10  -2   18.40    1.00
  -3 -10   2   18.50    1.00
   3  10   2   18.80    3.80
   3  10   2   15.20    1.30
  -3 -10   2   21.10   13.70
  -3  10  -2    7.20    6.80
  -3  10  -2   12.30    3.30
  -4  10   2   22.00   10.20
   4  10  -2   20.20    4.40
  -4  10   2   20.40    3.30
   4 -10   2   17.80    1.10
  -4 -10  -2   18.20    1.60
  -4  10   2   15.30    3.50
   4  10  -2   18.40    1.10
  -4 -10   2   26.20   15.30
  -4  10  -2   13.10    3.40
  -4 -10   2   17.10    1.10
  -4  10  -2   18.90    3.00
   4  10   2   16.20    3.40
  -4  10  -2   22.80   10.00
   4 -10  -2   19.20    1.10
   4  10   2   18.20    1.10
  -5 -10  -2   11.60    1.30
  -5 -10  -2   -9.00   27.10
   5 -10   2   11.90    0.80
  -5  10   2   -6.90    9.90
   5  10  -2   11.70    0.90
  -5  10   2    9.10    2.90
   5  10  -2    5.80    3.10
  -5  10   2   13.50    2.70
   5  10   2   12.40    0.90
   5  10   2   10.50    3.40
  -5 -10   2   12.00    1.50
  -5  10  -2   10.90    2.70
   5 -10  -2   12.50    0.80
  -5 -10   2   53.89   23.10
  -5  10  -2    6.70   11.20
  -6 -10  -2  132.89   27.00
   6 -10   2  141.79    5.90
  -6  10   2  148.39   30.70
  -6 -10  -2  151.48    6.70
   6  10  -2  155.78   13.10
  -6  10   2  147.49    8.70
  -6  10   2  159.28   10.40
   6  10  -2  156.48    6.00
  -6 -10   2  158.78    6.90
   6 -10  -2  150.88    5.90
   6  10   2  151.08   12.10
  -6  10  -2  155.98    8.80
  -6 -10   2  150.38   31.20
   6  10   2  157.28    6.00
  -6  10  -2  122.29   27.20
  -6 -10   2  146.69    6.40
  -7  10   2    2.10    1.60
  -7  10   2    2.00    1.80
  -7 -10  -2    4.40   31.90
   7  10  -2    2.30    0.40
  -7 -10  -2    2.30    0.70
   7 -10   2    2.20    0.30
   7  10   2    1.90    0.40
  -7 -10   2   31.40   29.60
  -7 -10   2    2.70    0.90
  -7 -10   2    3.60    0.60
   7 -10  -2    3.60    0.40
  -7  10  -2   -0.60    1.40
  -8  10   2   10.30    2.80
  -8 -10  -2   13.80    1.30
   8  10  -2   14.40    0.90
  -8  10   2    8.90    2.10
  -8  10  -2    9.80    2.30
  -8 -10   2   12.60    1.20
   8  10   2   14.50    0.80
  -8 -10   2   12.50    1.50
  -9 -10  -2   39.90    2.80
  -9  10   2   33.80    3.70
   9  10  -2   37.30    1.60
  -9  10   2   32.40    4.20
   9  10   2   36.50    1.60
  -9 -10   2   36.50    1.90
  -9 -10   2   39.80    2.30
  -9  10  -2   36.10    3.50
 -10 -10  -2   35.40    1.70
 -10  10   2   29.40    2.50
 -10  10   2   34.10    3.00
 -10  10  -2   32.50    3.90
 -10 -10   2   35.20    2.00
   0  11   2    5.80    5.00
   0  11  -2    0.20    0.30
   0 -11  -2   -0.10    0.20
   0 -11   2    0.00    0.20
   0  11   2   -0.10    0.30
   0  11  -2    0.00    3.10
   1  11  -2    2.00    0.40
  -1  11   2    4.90    3.80
  -1  11   2    1.60    0.30
   1 -11   2    2.40    0.50
  -1 -11  -2    1.60    0.30
  -1 -11   2    1.50    0.40
  -1  11  -2    1.40    0.30
   1  11   2    2.50    2.30
   1  11   2   -0.10    3.40
   1 -11  -2    0.90    0.30
   1  11   2    1.50    0.40
  -1  11  -2   11.60    5.40
  -1 -11   2    0.90   22.40
  -2  11   2    3.50    7.40
   2  11  -2    7.50    0.70
   2 -11   2    7.20    0.70
  -2 -11  -2    8.00    0.70
  -2 -11   2    7.60    0.70
   2 -11  -2    6.70    0.70
  -2  11  -2    5.80    2.90
   2  11   2   10.10    3.00
  -2  11  -2    7.70    0.60
   2  11   2    8.10    0.70
  -2 -11   2   50.39   37.30
  -2  11  -2   13.40    7.30
  -3  11   2   13.90    8.10
  -3  11   2    0.80    1.90
  -3 -11  -2   25.70   19.50
   3  11  -2    0.40    0.30
   3  11  -2    2.00    2.70
  -3 -11   2   -7.20   16.50
  -3  11  -2    4.40    8.00
   3  11   2   -2.10    2.00
   3  11   2    0.30    0.30
  -4  11   2  161.18    8.90
  -4  11   2  156.98   10.60
  -4 -11  -2  158.48    6.00
   4  11  -2  157.18    6.20
   4  11  -2  144.19   11.00
   4 -11   2  155.58    6.20
  -4 -11  -2  210.28   34.50
  -4 -11  -2  161.58    6.80
  -4  11   2  142.69   26.10
   4  11   2  158.18   10.90
  -4  11  -2  115.29   21.90
   4  11   2  160.08    6.20
   4 -11  -2  159.48    6.20
  -4 -11   2  162.48   35.80
  -4 -11   2  156.98    6.00
  -4  11  -2  155.18    8.80
  -5  11   2  202.28   10.70
  -5 -11  -2  235.58   34.10
   5 -11   2  203.48    7.90
   5  11  -2  187.98   13.50
  -5 -11  -2  200.68    8.50
  -5  11   2  206.08   12.50
   5  11  -2  204.18    7.90
   5  11   2  202.78    7.80
   5  11   2  203.08   13.10
  -5 -11   2  211.28    8.80
  -5  11  -2  172.98   33.00
   5 -11  -2  205.48    7.80
  -5  11  -2  198.78   10.60
   6  11  -2   22.30    1.30
  -6 -11  -2   46.20   23.80
  -6  11   2   23.50    3.40
   6 -11   2   23.70    1.20
  -6  11   2   21.80    3.80
  -6 -11  -2   22.90    1.80
  -6  11  -2   26.30    3.50
   6 -11  -2   21.70    1.20
  -6 -11   2   23.70    2.00
   6  11   2   24.00    1.30
  -6 -11   2   35.40   20.90
  -7 -11  -2   35.20    2.20
   7  11  -2   35.00    1.70
  -7  11   2   35.00    3.90
  -7  11   2   33.40    4.10
   7 -11   2   35.30    1.60
   7 -11  -2   35.40    1.60
  -7  11  -2   35.40    3.70
   7  11   2   37.20    1.70
  -7 -11   2   37.70    2.40
  -8 -11  -2    0.50    0.60
   8  11  -2    0.20    0.30
  -8  11   2   -0.40    1.20
  -8  11   2    0.20    1.30
   8 -11   2    0.80    0.30
   8  11   2    0.10    0.20
  -8  11  -2    0.00    1.20
  -8 -11   2    0.40    0.60
  -9 -11  -2   22.30    1.40
  -9  11   2   25.40    2.80
  -9  11   2   17.20    2.20
   9  11  -2   20.50    1.00
  -9  11  -2   20.20    2.40
  -9 -11   2   23.30    1.60
 -10  11   2    5.00    1.40
 -10  11  -2    5.50    1.10
 -10 -11   2    5.70    0.80
   0  12   2   29.00    1.40
   0  12  -2   17.90    7.50
   0 -12  -2   28.90    1.50
   0  12   2   26.60    9.70
   0  12  -2   29.70    1.50
   0 -12   2   29.40    1.50
   1  12  -2   36.20   11.00
  -1  12   2   24.60    9.40
   1  12  -2   43.90    1.90
   1 -12   2   41.50    2.00
  -1 -12  -2   44.00    1.90
  -1  12   2   40.80    1.80
   1  12   2   42.70    1.90
  -1  12  -2   48.70   15.10
   1  12   2   21.00    8.30
  -1  12  -2   42.50    1.90
  -1 -12   2   41.90    1.90
   1 -12  -2   41.60    1.90
  -2 -12  -2   79.39   38.10
  -2  12   2   11.20    9.50
   2  12   2    2.20    6.20
  -2 -12   2   53.49   33.50
  -2  12  -2   -1.30    9.60
  -3 -12  -2    3.60    0.80
   3 -12   2    2.40    0.40
  -3  12   2    3.10    1.90
  -3  12   2    1.40    2.00
  -3 -12  -2    2.30    0.40
  -3  12   2   -4.40   10.40
  -3 -12  -2   20.50   24.80
   3  12  -2    2.00    0.40
  -3  12  -2   24.80   11.90
  -3 -12   2   -1.10   26.10
   3  12   2   -5.30    5.10
   3  12   2    2.10    0.40
   3 -12  -2    1.80    0.40
  -3 -12   2    1.90    0.30
   3  12   2   -2.80    3.50
  -4  12   2  127.59    9.20
  -4 -12  -2  128.59    5.90
  -4  12   2  149.79   10.30
   4  12  -2  128.19    5.40
  -4 -12  -2  134.99    5.10
  -4  12  -2  132.59    9.80
   4  12   2  142.19    5.40
  -4 -12   2  162.38   49.00
  -5 -12  -2   13.60    1.30
   5 -12   2   15.40    0.90
  -5  12   2   14.10    2.70
   5  12  -2   13.30    0.90
  -5  12   2    9.80    2.50
  -5 -12   2   13.90    1.50
   5  12   2   15.00    0.90
   5 -12  -2   14.90    0.90
  -5  12  -2   13.80    2.90
   6  12  -2   32.90    1.60
   6 -12   2   32.40    1.60
  -6 -12  -2   34.80    2.10
  -6  12   2   31.60    3.60
  -6  12   2   32.60    4.00
   6 -12  -2   35.40    1.60
   6  12   2   35.00    1.60
  -6 -12   2   34.10    2.30
  -6  12  -2   29.50    3.50
  -7 -12  -2   77.49    3.50
   7  12  -2   77.39    3.10
   7 -12   2   75.19    3.00
  -7  12   2   71.89    5.40
  -7  12   2   73.89    5.20
   7 -12  -2   76.19    3.00
  -7  12  -2   69.49    4.90
  -7 -12   2   80.89    3.80
   7  12   2   77.69    3.10
   8  12  -2  131.09    4.90
  -8  12   2  127.49    6.70
  -8  12   2  112.09    6.30
   8 -12   2  117.99    4.80
  -8 -12  -2  128.79    5.20
  -8 -12   2  135.29    5.50
  -8  12  -2  130.59    6.60
   8  12   2  128.69    4.90
  -9  12   2   14.60    1.90
   9  12  -2   12.50    0.60
  -9 -12   2   12.60    1.20
  -9  12  -2   15.20    1.80
   0  13   2    0.10    0.20
   0  13  -2    0.20    0.30
  -1 -13  -2   76.39    3.30
   1  13  -2   75.59    3.10
  -1 -13   2   73.99    3.30
  -1  13  -2   63.79    2.80
   1 -13  -2   60.49    3.40
   1  13   2   69.89    3.00
  -2 -13  -2   11.60    0.70
   2  13  -2   10.80    0.80
  -2 -13  -2    8.50    1.00
   2 -13   2   10.00    0.80
  -2  13   2    9.10    2.80
  -2 -13   2   11.70    0.70
   2  13   2   10.50    0.80
   2 -13  -2   10.60    0.80
  -3  13   2   21.30    3.70
  -3  13   2   29.40    3.60
  -3 -13  -2   26.00    1.80
  -3 -13  -2   28.90    1.30
   3 -13   2   29.10    1.40
   3  13  -2   28.00    1.40
  -3  13  -2   30.90    3.60
   3  13   2   29.20    1.40
  -3 -13   2   28.90    1.30
   3 -13  -2   27.60    1.40
  -4 -13  -2    2.70    0.70
   4 -13   2    2.60    0.40
   4  13  -2    3.10    0.50
  -4  13   2    1.30    1.40
  -4  13   2    0.80    1.50
   4  13   2    2.70    0.40
   4 -13  -2    2.50    0.40
  -4 -13   2    2.20    0.80
  -4  13  -2    3.40    1.70
  -5  13   2   26.40    3.30
   5  13  -2   22.30    1.20
   5 -13   2   22.50    1.10
  -5  13   2   18.10    3.80
  -5 -13   2   21.20    1.70
   5 -13  -2   22.60    1.10
  -5  13  -2   22.30    3.20
   5  13   2   21.90    1.10
   6  13  -2    2.70    0.40
   6 -13   2    3.50    0.40
  -6 -13  -2    4.80    0.70
  -6  13   2    0.60    1.50
  -6  13   2    2.10    1.40
   6  13   2    2.70    0.40
  -6  13  -2    1.10    1.50
  -6 -13   2    3.80    0.90
   6 -13  -2    3.30    0.40
  -7  13   2   11.10    2.00
   7  13  -2    8.90    0.60
  -7 -13  -2    8.60    0.80
   7 -13   2    8.40    0.50
  -7 -13   2    8.80    1.00
  -7  13  -2    8.70    1.60
   7  13   2    8.60    0.60
  -8  13   2   20.20    2.10
   8  13  -2   17.80    1.00
  -8 -13   2   15.00    1.20
  -8  13  -2   17.50    2.30
   0  14  -2   14.80    0.80
   0 -14  -2   14.40    0.90
   0 -14   2   13.50    0.80
  -1 -14  -2   13.50    0.80
  -1  14   2    8.80    2.60
   1 -14   2   13.30    0.80
   1  14  -2   13.70    0.80
   1  14   2   12.90    0.80
   1 -14  -2   13.50    0.80
  -1 -14   2   13.80    0.80
  -2  14   2   -0.70    1.30
  -2  14   2    0.10    1.20
   2 -14   2    0.10    0.30
   2  14  -2    0.20    0.20
  -2 -14  -2   -0.80    0.50
  -2 -14  -2    0.00    0.20
  -2  14  -2    0.00    1.20
   2 -14  -2    0.30    0.30
   2  14   2    0.00    0.20
  -2 -14   2    0.50    0.20
   3 -14   2    8.90    0.70
  -3 -14  -2   11.10    0.60
  -3  14   2    7.00    2.20
  -3 -14  -2    8.80    1.00
  -3  14   2    9.70    2.00
   3  14  -2    9.90    0.70
  -3 -14   2   10.30    1.20
  -3 -14   2   10.40    0.60
   3  14   2    9.80    0.70
  -3  14  -2    9.90    2.00
   3 -14  -2   11.10    0.70
  -4  14   2   54.79    4.30
   4  14  -2   55.29    2.30
   4 -14   2   55.89    2.30
  -4  14  -2   55.49    4.30
   4  14   2   54.79    2.40
  -4 -14   2   56.69    3.20
   4 -14  -2   56.49    2.30
   5  14  -2   12.30    0.70
  -5 -14  -2    8.80    0.90
  -5  14   2   11.20    2.30
   5 -14   2   10.60    0.70
   5  14   2   11.30    0.70
  -5  14  -2    9.50    1.80
   5 -14  -2   11.10    0.70
  -5 -14   2   10.50    1.00
   6 -14   2    8.60    0.50
  -6  14   2    5.70    1.40
   6  14  -2    8.80    0.60
   6 -14  -2    8.40    0.50
  -6 -14   2    7.80    0.90
  -6  14  -2    7.10    1.50
   7  14  -2   75.39    2.80
   7 -14   2   64.79    2.60
  -7  14   2   69.59    3.90
   7 -14  -2   63.39    2.70
  -7 -14   2   64.49    2.90
  -7  14  -2   67.39    3.70
   0 -15  -2    0.40    0.30
   0 -15   2   -0.20    0.20
   0  15   2    0.10    1.20
  -1 -15  -2    4.30    0.40
  -1  15   2    3.20    1.50
   1  15  -2    4.10    0.40
   1 -15   2    4.40    0.50
   1 -15  -2    4.10    0.40
  -1 -15   2    4.80    0.40
  -1  15  -2    3.00    1.30
  -2  15   2   23.20    3.40
  -2 -15  -2   18.20    0.80
   2  15  -2   16.80    0.90
  -2  15  -2   15.30    2.60
  -2 -15   2   16.80    1.20
  -2 -15   2   17.30    0.90
   3  15  -2    4.80    0.40
   3 -15   2    4.80    0.50
  -3  15   2    3.80    1.50
   3 -15  -2    4.20    0.40
  -3 -15   2    4.20    0.70
  -3  15  -2    3.60    1.40
   4 -15   2   66.39    2.60
  -4  15   2   62.49    4.10
   4  15  -2   63.99    2.60
  -4  15  -2   62.09    4.00
  -4 -15   2   62.29    2.90
   4 -15  -2   65.99    2.60
  -5  15   2    2.00    1.10
   5 -15   2    2.20    0.30
   5  15  -2    2.00    0.30
  -5  15  -2    2.80    1.00
   5 -15  -2    2.40    0.30
  -5 -15   2    2.50    0.40
   0 -16   2    8.50    0.50
   0 -16   2    7.70    0.70
   0 -16  -2    8.20    0.50
   0  16  -2    8.90    1.80
   0  16   2    8.70    2.30
  -1  16   2    1.40    1.30
  -1 -16  -2    0.00    0.10
   1 -16   2    0.00    0.20
  -1 -16   2    0.20    0.10
   1  16   2    0.10    0.80
   1 -16  -2    0.10    0.20
  -1 -16   2    0.10    0.30
   2 -16   2    0.60    0.20
  -2  16   2   -0.20    0.80
   2 -16  -2    0.60    0.20
  -2  16  -2    0.70    0.80
   2  16   2   -0.10    0.70
  -2 -16   2    0.40    0.40
   3 -16   2  176.68    6.40
  -3  16   2  176.98    8.60
  -3  16  -2  151.68    8.60
   3 -16  -2  167.08    6.30
   0   0   3   -0.30    0.60
   0   0  -3   -1.00    0.70
   0   0   3    0.40    0.40
  -1   0   3    1.40    1.20
   1   0  -3    1.70    2.30
  -1   0   3    0.00    0.80
  -1   0  -3    0.30    2.00
  -2   0  -3    2.20    2.50
  -2   0   3    1.00    1.80
  -2   0   3   -1.90    2.40
  -3   0   3    0.70    1.70
   3   0   3    0.50    0.50
  -3   0   3    1.90    2.50
  -3   0  -3    1.70    2.30
  -4   0   3    0.70    1.50
  -4   0   3   -1.50    1.40
  -4   0  -3    0.50    1.90
   4   0   3   -0.20    0.50
  -5   0  -3   -1.50    1.60
   5   0   3   -0.10    0.70
  -5   0   3    1.90    2.50
   6   0   3    0.90    1.00
  -6   0   3    2.50    3.30
  -7   0   3    0.60    0.50
  -7   0   3    0.80    0.60
  -7   0   3   -0.60    0.90
  -7   0  -3    1.20    1.00
  -7   0  -3   -0.20    0.40
   7   0   3   -1.30    0.90
  -7   0   3   -0.40    0.50
  -7   0   3   -2.30    0.90
  -7   0  -3    0.30    0.50
  -7   0   3    1.30    2.80
  -7   0   3    0.50    0.70
  -7   0  -3   -0.30    0.40
  -7   0  -3   -0.70    0.30
  -8   0  -3    0.50    0.70
  -8   0   3    0.10    1.20
  -8   0  -3    2.20    1.20
  -8   0  -3    0.00    0.40
  -8   0   3   -0.40    0.50
  -8   0   3   -0.60    0.50
  -8   0   3   -0.60    0.50
  -8   0   3   -0.80    0.70
  -8   0   3   -0.60    1.20
  -8   0  -3    0.10    0.40
  -8   0  -3   -0.60    0.90
  -9   0  -3    0.20    0.50
  -9   0  -3   -0.20    0.60
  -9   0   3   -0.30    0.50
  -9   0   3   -0.30    1.40
  -9   0  -3   -0.70    0.50
  -9   0  -3    1.40    1.80
  -9   0  -3    0.70    1.20
  -9   0   3    0.20    0.70
  -9   0   3    0.60    0.60
  -9   0   3    0.70    1.40
   9   0  -3   -0.30    3.00
  -9   0   3    0.30    0.70
  -9   0  -3   -0.20    0.50
 -10   0  -3    0.70    0.60
 -10   0  -3   -0.40    1.20
 -10   0   3   -0.50    1.60
 -10   0  -3   -0.10    0.50
 -10   0   3   -0.60    1.40
 -10   0   3   -0.10    0.80
 -10   0   3    0.40    0.60
 -10   0  -3    0.50    0.70
 -10   0   3   -1.20    0.60
 -10   0  -3   -0.60    0.50
 -10   0  -3    0.00    1.10
 -10   0   3   -0.60    0.60
 -11   0   3    0.20    0.50
 -11   0   3    4.10    1.00
 -11   0   3    1.00    1.40
 -11   0   3    3.20    1.00
 -11   0   3    1.90    0.60
 -12   0   3    0.20    0.50
 -12   0   3    0.60    0.70
 -12   0   3   -0.30    0.40
 -12   0  -3    0.20    0.50
 -12   0   3    0.20    0.50
 -12   0   3   -0.10    1.00
 -13   0   3   -0.30    0.30
 -13   0   3    0.50    0.40
 -13   0   3    0.00    0.30
   0   1  -3    2.10    1.70
   0   1   3    3.30    0.70
   0  -1  -3    5.90    3.10
   0   1  -3    0.30    0.90
   0   1   3    0.40    0.90
   0  -1   3    0.60    0.80
   1   1  -3   35.80    5.20
  -1   1   3   33.70    4.50
  -1  -1  -3   33.10    5.20
   1  -1   3   37.00    2.30
  -1   1   3   35.00    3.00
  -1  -1   3   36.80    3.80
   1   1   3   34.50    2.20
  -1   1  -3   36.20    5.50
   1  -1  -3   34.60    5.40
  -2   1   3   88.29    8.30
  -2   1   3   81.09    7.60
   2  -1   3   77.69    3.70
  -2  -1  -3   82.99    8.50
   2   1   3   86.09    4.50
  -2  -1   3   85.89    8.90
  -2   1  -3   80.59    8.10
  -2  -1   3   83.49    6.90
  -2   1  -3   78.39    4.70
  -3   1   3   29.00    4.90
  -3  -1  -3   37.10    5.80
  -3   1   3   43.60    6.60
   3  -1   3   39.70    2.40
  -3  -1   3   36.70    5.30
   3   1   3   44.90    3.20
  -3  -1   3   43.30    6.50
  -3   1  -3   49.30    6.10
  -3   1  -3   43.30    3.80
  -4   1   3  427.96   25.70
  -4  -1  -3  439.56   24.90
   4  -1   3  417.16   17.20
  -4   1  -3  456.15   22.90
  -4  -1   3  426.66   23.30
  -4   1  -3  412.26   20.10
   4   1   3  427.36   18.60
  -4  -1   3  442.56   23.30
   5  -1   3  482.75   20.10
  -5  -1  -3  508.25   26.60
  -5   1   3  499.75   29.60
  -5  -1  -3  462.15   25.40
   5   1   3  509.65   21.70
  -5   1  -3  483.45   23.50
  -5  -1   3  499.45   27.20
  -5   1  -3  504.25   22.00
  -6   1   3  202.08   17.20
   6  -1   3  201.38    9.80
   6   1   3  203.38   11.10
  -6   1  -3  187.18   12.60
  -6  -1   3  200.28   15.70
   7  -1   3   75.69    5.00
  -7   1   3   69.39    4.90
  -7   1   3   74.89    4.50
  -7   1   3   82.09    6.20
  -7  -1  -3   81.99    5.30
  -7  -1  -3   79.59    3.70
  -7   1   3   74.89    4.00
  -7  -1  -3   74.89    3.80
  -7   1   3   69.99   11.30
  -7   1   3   78.79    3.70
  -7  -1  -3   75.59    3.70
  -7  -1  -3   78.59    4.10
  -7   1   3   72.29    3.70
  -7  -1   3   68.49    9.90
  -7   1  -3   78.09    3.80
  -7  -1   3   71.59    4.00
  -7  -1   3   77.59    3.80
  -7  -1   3   77.09    4.40
  -7   1  -3   78.99    4.10
  -7   1  -3   77.29    3.60
   7   1   3   81.19    6.40
  -7   1  -3   75.19    3.60
  -7  -1   3   71.79    4.70
  -7  -1   3   79.69    5.90
  -7  -1   3   75.89    3.80
  -8  -1  -3   18.50    1.50
  -8  -1  -3   21.00    2.80
  -8   1   3   18.20    2.20
  -8   1   3   19.30    3.50
  -8  -1  -3   17.80    1.50
  -8   1   3   19.10    2.70
  -8  -1  -3   19.20    1.70
  -8  -1  -3   20.10    1.90
  -8   1   3   18.60    1.90
  -8   1   3   18.50    1.60
  -8   1   3   17.30    1.60
  -8   1   3   17.80    5.70
  -8  -1  -3   17.90    2.20
  -8   1  -3   23.10    2.00
   8   1   3   15.20    3.20
  -8  -1   3   18.30    1.70
  -8  -1   3   18.20    2.70
  -8  -1   3   17.20    1.80
  -8  -1   3   17.60    1.60
  -8  -1   3   18.00    2.10
  -8   1  -3   23.00    1.60
  -8   1  -3   19.60    2.50
  -8   1  -3   24.20    1.70
  -8   1  -3   18.60    3.00
  -8  -1   3   16.70    3.30
  -9   1   3    6.70    1.30
  -9   1   3    9.50    2.90
  -9   1   3    8.60    1.30
  -9   1   3    8.50    1.20
  -9   1   3    8.50    2.20
  -9  -1  -3    6.80    1.10
  -9  -1  -3    7.70    1.20
  -9   1   3   -4.20    4.70
  -9  -1  -3    7.30    1.90
  -9  -1  -3    6.60    1.30
  -9  -1  -3    4.90    1.60
  -9  -1  -3    5.00    0.90
  -9   1   3    5.90    1.50
  -9   1  -3    7.10    1.10
  -9  -1   3    5.20    1.00
  -9  -1   3    5.40    1.10
  -9   1  -3    8.40    1.40
  -9  -1   3    7.80    1.30
  -9   1  -3    7.00    1.10
  -9   1  -3    7.90    2.10
   9   1   3    5.20    2.90
  -9   1  -3    5.90    1.00
  -9  -1   3    6.80    2.40
  -9  -1   3   10.00    1.80
  -9  -1   3    9.00    2.20
  -9   1  -3    7.30    2.20
 -10   1   3  217.48   10.10
 -10  -1  -3  220.58    9.00
 -10   1   3  220.78    9.10
 -10  -1  -3  206.88    9.00
 -10  -1  -3  218.38    9.10
 -10  -1  -3  210.18    9.70
 -10   1   3  214.48    9.50
 -10   1   3  218.28    9.20
 -10   1   3  215.58   10.70
 -10   1   3  218.48   12.40
 -10  -1   3  214.88    9.50
 -10  -1   3  226.48   11.90
 -10   1  -3  212.08    9.00
 -10  -1   3  221.58   10.00
 -10   1  -3  226.88    9.50
 -10  -1   3  212.58    9.20
 -10   1  -3  226.38   11.10
 -10   1  -3  214.18    9.00
 -10   1  -3  219.38    8.90
 -10  -1   3  213.28   10.30
 -10  -1   3  213.08    9.20
 -10   1  -3  202.98   10.00
 -11   1   3  212.58   10.30
 -11   1   3  216.78    9.00
 -11  -1  -3  214.78    8.80
 -11   1   3  220.48    9.00
 -11   1   3  227.98    9.90
 -11   1   3  212.08    9.30
 -11  -1  -3  218.08    9.00
 -11   1   3  207.28   11.70
 -11  -1   3  217.38    9.40
 -11  -1   3  218.48    9.80
 -11  -1   3  217.28    9.10
 -11   1  -3  211.28    8.80
 -11  -1   3  227.38   11.40
 -11   1  -3  218.08    8.80
 -11  -1   3  220.48   10.00
 -11  -1   3  218.78    9.10
 -11   1  -3  218.58    9.70
 -12   1   3   20.70    2.60
 -12  -1  -3   22.40    1.50
 -12   1   3   21.20    1.70
 -12   1   3   22.00    1.60
 -12   1   3   21.70    1.50
 -12   1   3   21.30    2.00
 -12  -1  -3   20.80    1.50
 -12   1   3   18.30    2.80
 -12  -1   3   23.00    1.60
 -12  -1   3   22.70    1.70
 -12  -1   3   22.60    1.80
 -12   1  -3   22.70    1.50
 -12  -1   3   21.00    1.90
 -13  -1  -3    3.40    0.50
 -13   1   3    4.20    0.60
 -13   1   3    4.60    0.70
 -13  -1   3    4.60    0.70
 -13  -1   3    5.00    0.70
 -13  -1   3    5.00    0.80
   0  -2  -3  319.47   20.10
   0   2  -3  330.97   19.90
   0   2   3  309.37   15.00
   0   2   3  319.37   12.80
   1   2  -3   86.29    9.10
  -1  -2  -3   81.59    9.00
  -1   2   3   87.39    4.70
  -1   2   3   86.99    7.40
   1   2   3   87.29    4.50
   1  -2  -3   79.69    9.20
  -1   2  -3   84.59    8.70
   2  -2   3  115.89    5.40
  -2   2   3  116.09   11.10
  -2   2   3  114.49   10.20
   2   2  -3  124.49   13.70
  -2   2   3  118.79    7.10
  -2  -2  -3  132.69   11.90
  -2   2  -3  107.09    5.10
  -2   2  -3  121.49    7.40
  -2   2  -3  129.69   10.90
  -2  -2   3  127.59   12.20
   2   2   3  126.69    6.30
  -3  -2  -3    1.20    2.40
   3  -2   3    0.70    0.40
  -3   2   3   -2.90    2.80
  -3   2  -3   -2.80    1.70
   3   2   3    0.60    0.60
  -3  -2   3   -2.20    3.40
  -3   2  -3    2.10    1.50
  -4   2   3    0.00    2.00
  -4  -2  -3    1.60    3.10
   4   2   3    0.10    0.70
  -4  -2   3   -1.90    3.90
  -4   2  -3    0.50    1.20
  -4  -2   3    1.40    1.50
  -4   2  -3   -1.30    1.70
  -5  -2  -3   51.09    8.10
  -5   2   3   47.90   10.30
   5  -2   3   44.40    2.60
  -5  -2  -3   45.60    7.70
   5   2   3   51.99    4.50
  -5  -2   3   51.89    6.60
  -5  -2   3   51.49    6.50
  -5   2  -3   53.79    5.30
  -5  -2   3   50.09    7.80
  -5   2  -3   44.50    6.10
  -6  -2  -3    2.00    3.70
  -6   2   3    6.00    4.20
   6  -2   3    8.80    1.20
  -6  -2  -3    7.90    3.70
   6   2   3    9.20    2.40
  -6   2  -3    9.40    3.40
  -7   2   3  240.88   16.40
  -7   2   3  225.28   11.70
  -7  -2  -3  226.78    9.60
  -7   2   3  215.88    9.70
  -7   2   3  229.88    9.40
  -7   2   3  239.78   21.20
  -7  -2  -3  216.58    9.30
  -7   2   3  227.48   13.40
  -7   2   3  219.68    9.40
  -7  -2  -3  241.88   10.70
  -7  -2  -3  243.08   11.10
  -7   2  -3  227.28    9.90
  -7  -2   3  234.88   10.50
  -7   2  -3  217.58   10.70
  -7   2  -3  227.48    9.50
  -7   2  -3  271.57   15.40
   7   2   3  241.68   15.10
  -7   2  -3  216.98   15.10
  -8  -2  -3    1.40    0.60
  -8  -2  -3    2.30    1.00
  -8  -2  -3    2.40    0.70
  -8   2   3    0.90    0.50
  -8   2   3    2.20    1.40
  -8   2   3    0.90    0.60
  -8   2   3    1.30    1.70
  -8   2   3    2.00    0.80
  -8  -2  -3    2.70    1.30
  -8  -2  -3    1.70    0.60
  -8   2   3    1.50    1.00
  -8  -2  -3    1.10    0.60
  -8  -2   3    1.60    0.70
  -8   2  -3    1.80    1.30
  -8   2  -3    1.60    0.60
  -8  -2   3    1.80    0.80
  -8  -2   3    0.40    1.20
  -8   2  -3   -0.10    1.30
  -8   2  -3    1.50    0.60
  -8  -2   3    1.20    0.80
   8   2   3   -1.20    2.10
  -8  -2   3    2.00    0.70
  -8   2  -3    1.80    0.60
  -8   2  -3    1.10    0.70
  -9  -2  -3  105.89    5.10
  -9   2   3  110.19    5.00
  -9   2   3   75.99   13.20
  -9   2   3  109.09    5.10
  -9  -2  -3  114.29    5.40
  -9  -2  -3  105.29    5.10
  -9   2   3  116.19    8.40
  -9   2   3  100.99    5.30
   9   2  -3   99.89   10.20
  -9   2   3  108.49    6.70
  -9   2   3  105.59    6.00
  -9  -2  -3  103.99    4.90
  -9  -2   3  108.29    5.80
  -9  -2   3  104.89    5.20
  -9   2  -3  104.09    4.90
  -9   2  -3  113.39    7.20
  -9  -2   3  106.49    6.10
  -9   2  -3  109.69    5.00
  -9   2  -3  103.59    6.30
  -9  -2   3   97.69    5.10
  -9   2  -3  111.09    5.50
  -9   2  -3  109.19    4.90
  -9  -2   3   95.69    5.30
  -9  -2   3  116.69    7.70
 -10  -2  -3    0.70    0.60
 -10   2   3    1.50    1.00
 -10   2   3    1.20    1.90
 -10   2   3    0.80    1.60
 -10  -2  -3    0.20    0.50
 -10  -2  -3    0.50    0.60
  10   2  -3    3.80    4.40
 -10   2   3    0.60    0.60
 -10   2   3    0.20    0.70
 -10   2   3    0.50    0.60
 -10   2  -3    0.80    0.60
 -10  -2   3    0.20    0.60
 -10  -2   3    0.40    1.40
 -10   2  -3    0.70    0.60
 -10  -2   3    1.60    0.80
 -10   2  -3    1.30    0.70
 -10  -2   3    0.10    0.70
 -10  -2   3    0.50    0.80
 -10   2  -3    0.10    1.20
 -10  -2   3   -0.40    1.50
 -10   2  -3    1.00    0.60
 -10   2  -3    1.50    1.40
 -11  -2  -3   -0.10    0.40
 -11   2   3    0.50    1.60
 -11   2   3   -0.20    0.50
 -11   2   3   -0.10    0.50
 -11   2   3    0.00    0.50
 -11   2   3   -2.00    1.40
 -11   2   3   -0.40    0.70
 -11  -2  -3    0.50    0.50
 -11  -2   3    0.10    1.20
 -11  -2   3    0.40    0.60
 -11  -2   3    0.30    0.70
 -11   2  -3    0.50    1.10
 -11   2  -3    0.20    0.50
 -11  -2   3    1.00    0.70
 -11  -2   3    0.60    0.80
 -12   2   3   69.99    3.40
 -12   2   3   69.39    5.10
 -12  -2  -3   69.89    3.30
 -12   2   3   69.99    3.90
 -12   2   3   70.29    3.20
 -12   2   3   70.59    3.10
 -12   2   3   70.89    4.40
 -12  -2  -3   68.39    3.20
 -12  -2   3   67.49    3.70
 -12  -2   3   67.49    3.40
 -12  -2   3   67.89    3.50
 -12  -2   3   64.89    3.30
 -13  -2  -3   53.39    2.50
 -13  -2   3   49.50    2.50
 -13  -2   3   52.09    2.50
 -13  -2   3   50.49    2.40
   0   3   3    0.40    0.40
   0  -3  -3    3.40    3.60
   0   3  -3   -2.50    2.60
   1   3  -3  370.16   24.10
  -1   3   3  375.26   15.00
  -1   3   3  353.76   19.10
  -1  -3  -3  365.96   23.90
   1   3   3  365.96   15.20
  -1   3  -3  370.46   23.10
   1  -3  -3  343.57   23.70
  -2  -3  -3 1484.35   67.19
  -2   3   3 1461.55   56.99
  -2   3   3 1524.75   63.39
   2   3  -3 1406.06   67.79
  -2   3  -3 1435.16   58.29
  -2   3  -3 1539.05   65.99
   2   3   3 1437.06   56.19
  -3  -3  -3    1.70    3.10
  -3   3   3   -0.70    1.50
  -3   3  -3   -2.70    1.70
   3   3   3    1.00    0.90
  -3   3  -3    0.00    1.00
  -3  -3   3    8.10    5.50
  -4   3   3  156.68   15.30
  -4  -3  -3  120.59   14.30
  -4  -3  -3  146.99   14.60
  -4   3  -3  143.79   12.30
  -4  -3   3  171.48   16.20
   4   3   3  125.89    8.00
  -4   3  -3  131.49   11.40
  -5  -3  -3   17.30    7.00
  -5  -3  -3   11.10    7.40
  -5   3   3   28.70    8.50
   5   3   3   20.60    3.10
  -5  -3   3   14.90    7.80
  -5  -3   3   21.40    6.50
  -5   3  -3   21.60    5.90
  -6  -3  -3   51.39    9.50
  -6  -3  -3   45.60   15.10
  -6   3   3   53.89   10.40
  -6   3  -3   52.09    7.30
  -6  -3   3   53.09    7.10
  -6  -3   3   58.09    9.10
   6   3   3   52.39    5.40
  -7   3   3   20.20    2.10
  -7   3   3   19.30    2.80
  -7   3   3   19.60    3.30
  -7  -3  -3   20.50    1.70
  -7  -3  -3   18.80    1.50
  -7   3   3   18.10    1.50
  -7  -3  -3   20.00    1.60
  -7   3   3   17.10    1.70
  -7   3   3   20.00    7.00
  -7   3  -3   19.00    1.40
  -7  -3   3   18.40    1.60
  -7   3  -3   18.40    3.00
  -7  -3   3   23.60    2.30
  -7   3  -3   19.50    1.40
  -7  -3   3   21.70    2.90
  -7  -3   3   17.50    1.90
  -7   3  -3   21.50    2.60
  -7   3  -3   19.80    5.60
  -7  -3   3   16.40    1.70
  -7   3  -3   20.20    1.90
   7   3   3   20.70    3.60
  -7  -3   3   16.80    1.60
  -8  -3  -3  175.38    7.70
  -8   3   3  178.28    8.00
  -8  -3  -3  181.28    7.60
  -8  -3  -3  174.48    7.70
  -8   3   3  174.08    9.20
  -8   3   3  179.48    7.50
  -8   3   3  182.68    7.60
  -8  -3  -3  181.18    8.00
  -8   3   3  174.48    8.60
  -8   3   3  194.38   11.40
  -8   3   3  152.18   19.70
  -8   3  -3  186.78    7.50
  -8   3  -3  186.28    7.70
   8   3   3  165.88   15.20
  -8  -3   3  177.48    8.50
  -8   3  -3  167.38    9.00
  -8  -3   3  183.98    8.50
  -8   3  -3  186.98   10.20
  -8  -3   3  171.88    8.10
  -8  -3   3  195.78   10.20
  -8   3  -3  191.78    8.20
  -8  -3   3  179.78    7.90
  -8   3  -3  182.88    7.50
  -8  -3   3  174.28    7.80
  -9   3   3   33.20   10.50
  -9   3   3   30.90    2.40
  -9  -3  -3   30.10    2.20
  -9  -3  -3   29.90    2.10
  -9   3   3   33.40    4.80
   9   3  -3   18.60    5.00
  -9   3   3   31.40    2.90
  -9   3   3   29.30    3.60
  -9   3   3   30.90    2.00
  -9  -3  -3   29.50    2.10
  -9   3   3   29.50    2.00
  -9  -3   3   28.70    2.30
  -9   3  -3   30.90    3.80
  -9  -3   3   28.50    2.40
  -9   3  -3   30.10    2.10
  -9  -3   3   30.60    3.70
  -9   3  -3   30.30    2.00
   9   3   3   34.50    5.00
  -9  -3   3   31.00    2.30
  -9   3  -3   28.10    3.30
  -9  -3   3   29.30    2.60
  -9   3  -3   31.30    2.40
  -9   3  -3   29.10    1.90
 -10   3   3    5.90    1.20
 -10  -3  -3    3.90    0.80
 -10   3   3    6.40    2.30
 -10   3   3    5.70    1.00
 -10  -3  -3    4.20    0.90
 -10   3   3    4.60    2.10
 -10  -3  -3    6.70    1.10
 -10   3   3    7.50    1.50
 -10   3   3    4.60    0.90
  10   3  -3    8.60    5.00
 -10  -3   3    4.00    1.10
 -10  -3   3    4.90    1.10
 -10  -3   3    4.40    1.00
 -10   3  -3    4.10    1.70
 -10  -3   3    3.40    0.90
 -10   3  -3    6.30    1.00
 -10   3  -3    2.10    1.50
 -10   3  -3    4.40    1.00
 -10  -3   3    6.70    2.20
  10   3   3   11.00    8.50
 -10   3  -3    5.90    1.00
 -11   3   3    5.70    0.90
 -11   3   3    5.70    2.30
 -11   3   3    6.00    1.20
 -11   3   3    4.50    0.80
 -11  -3  -3    5.80    0.90
 -11  -3  -3    6.80    1.10
 -11   3   3    5.50    1.00
 -11   3   3    5.20    2.00
 -11  -3   3    5.10    1.00
 -11  -3   3    4.60    0.90
 -11   3  -3    4.10    1.30
 -11   3  -3    5.70    1.60
 -11  -3   3    5.60    1.00
 -11  -3   3    4.40    1.00
 -12   3   3   25.30    1.50
 -12   3   3   17.30    1.90
 -12  -3  -3   22.00    1.60
 -12   3   3   19.50    2.70
 -12   3   3   22.50    3.10
 -12   3   3   21.90    1.90
 -12  -3  -3   23.40    1.50
 -12   3  -3   23.20    2.10
 -12  -3   3   20.60    1.60
 -12  -3   3   22.30    1.60
 -12  -3   3   23.50    1.70
 -13  -3  -3    5.30    0.60
 -13  -3   3    6.00    0.90
 -13  -3   3    5.60    0.70
   0  -4  -3  655.93   38.40
   0   4  -3  686.23   38.30
   0   4   3  701.93   26.80
  -1  -4  -3   23.90    7.40
  -1   4   3   18.80    1.80
  -1   4   3   15.40    5.30
   1   4  -3   19.60    6.30
   1  -4  -3   16.20    7.20
   1   4   3   17.50    2.00
  -1   4  -3   18.50    6.10
  -2  -4  -3    1.70    2.70
  -2   4   3    2.10    1.00
   2   4  -3    6.30    4.80
  -2   4   3    5.10    2.90
  -2   4  -3    0.60    1.10
  -2   4  -3   -1.50    2.70
  -3   4   3  161.18    9.50
  -3   4   3  188.28   15.60
  -3  -4  -3  147.29   15.90
   3   4  -3  121.29   17.00
  -3   4  -3  148.89   11.80
   3   4   3  155.28    8.70
  -3  -4   3  156.38   18.80
  -4  -4  -3  136.39   15.80
  -4   4   3  148.99   16.10
  -4  -4  -3  152.68   18.40
   4   4   3  141.49    8.90
  -4  -4   3  169.78   20.60
  -4   4  -3  152.28   14.00
  -5   4   3  107.79   14.40
  -5  -4  -3   96.49   13.90
  -5  -4  -3   94.19   16.40
  -5   4  -3  109.09   11.90
  -5  -4   3  112.69   17.10
   5   4   3  102.49    7.50
  -5  -4   3   99.89   13.00
  -6   4   3    8.70    2.00
  -6  -4  -3    8.70    7.30
  -6  -4  -3    3.70    8.70
  -6   4   3    7.20    5.50
  -6   4   3    8.70    2.30
  -6  -4   3    6.10    4.50
   6   4   3    7.60    2.30
  -6  -4   3    9.20    2.10
  -6  -4   3   17.80    8.70
  -6   4  -3    8.50    0.90
  -6  -4   3    9.10    1.00
  -6   4  -3    7.00    4.90
  -6  -4   3    9.00    1.20
  -6   4  -3    9.50    0.90
  -7  -4  -3   12.00    1.20
  -7  -4  -3   10.00    1.30
  -7  -4  -3    2.20    6.10
  -7   4   3   11.90    1.50
  -7   4   3   13.80    2.50
  -7  -4  -3   12.70    1.20
  -7  -4  -3    5.40    5.80
  -7   4   3   10.80    2.80
  -7   4   3   12.20    1.80
  -7   4   3   27.00    8.80
  -7   4   3   11.80    1.20
  -7  -4   3   13.10    2.20
  -7   4  -3   12.30    1.10
  -7  -4   3   12.10    1.50
  -7  -4   3   10.10    1.30
  -7   4  -3   12.80    1.20
  -7   4  -3   13.40    1.50
   7   4   3    9.20    2.50
  -7  -4   3   11.20    1.40
  -7   4  -3   12.90    2.80
  -7   4  -3   16.90    6.10
  -7   4  -3   13.70    1.10
  -7  -4   3    9.80    1.30
  -7   4  -3   13.30    2.40
  -8   4   3   23.80    2.50
   8   4  -3   19.50    5.50
  -8  -4  -3   20.80    1.70
  -8   4   3   20.50    2.00
  -8   4   3   20.80    3.80
  -8  -4  -3   18.10    1.80
  -8   4   3   23.30    1.60
  -8   4   3   12.40    8.80
  -8  -4  -3   21.30    1.70
  -8   4   3   23.50    1.60
  -8   4   3   20.00    4.20
  -8   4  -3   24.10    1.70
   8   4   3   25.00    4.30
  -8   4  -3   21.30    3.00
  -8   4  -3   23.00    3.50
  -8  -4   3   22.60    2.10
  -8   4  -3   23.90    1.70
  -8  -4   3   23.00    2.00
  -8   4  -3   24.00    2.00
  -8  -4   3   20.50    2.00
  -8   4  -3   21.80    1.60
  -8  -4   3   22.30    2.40
  -8  -4   3   23.80    3.10
  -9   4   3   23.10    2.10
  -9  -4  -3   24.00    1.90
  -9   4   3   25.40    2.60
  -9   4   3   22.50    1.60
  -9   4   3   25.70    4.30
  -9   4   3   24.30    3.40
  -9  -4  -3   22.00    1.70
   9   4  -3   18.40    5.30
  -9   4   3   13.10    9.10
  -9   4   3   23.30    1.70
  -9  -4  -3   25.10    1.90
  -9   4  -3   23.80    2.00
  -9  -4   3   24.60    2.30
  -9   4  -3   25.10    1.70
  -9   4  -3   25.20    3.50
  -9  -4   3   21.70    2.00
  -9   4  -3   27.40    3.60
  -9  -4   3   23.30    2.10
   9   4   3   21.30    4.60
  -9  -4   3   25.20    2.10
 -10   4   3   14.10    2.10
 -10   4   3   14.80    1.40
 -10   4   3   14.80    2.10
 -10   4   3   10.60    2.60
 -10   4   3   12.00    3.10
 -10  -4  -3   13.00    1.50
 -10   4   3   12.60    1.70
 -10  -4  -3   13.20    1.40
 -10   4  -3   13.70    2.90
 -10  -4   3   13.40    1.70
 -10  -4   3   13.00    1.60
 -10  -4   3   12.10    1.50
 -10  -4   3   14.70    1.70
 -11   4   3    7.10    1.10
 -11  -4  -3    7.20    1.00
 -11   4   3    4.40    2.10
 -11  -4  -3    6.00    0.80
 -11   4   3    3.10    1.60
 -11   4   3    6.10    0.90
 -11   4   3    4.40    1.10
 -11  -4   3    5.10    1.00
 -11  -4   3    5.10    1.00
 -11   4  -3    5.50    1.40
 -11  -4   3    4.60    0.90
 -11   4  -3    3.00    1.50
 -11  -4   3    4.70    1.00
 -12   4   3   25.00    1.90
 -12  -4  -3   26.20    1.60
 -12   4   3   21.90    2.90
 -12  -4  -3   24.90    1.40
 -12  -4   3   24.20    1.60
 -12  -4   3   18.90    2.30
 -12   4  -3   24.40    2.20
 -13  -4  -3   20.80    1.30
 -13  -4   3   22.50    1.30
 -13  -4   3   21.10    1.20
   0   5  -3    1.50    3.60
   0  -5  -3    2.80    4.80
   1   5  -3   17.10    6.20
  -1  -5  -3    1.90    5.40
  -1   5   3    2.20    1.90
  -1   5   3    1.00    0.50
   1  -5  -3   11.00    5.40
  -1   5  -3   -2.20    2.80
  -2   5   3  240.58   11.80
  -2  -5  -3  250.27   22.20
  -2   5   3  246.48   17.80
   2   5  -3  228.68   23.00
   2  -5  -3  212.28   22.60
   2   5   3  235.78   11.80
  -2   5  -3  245.88   20.80
  -2   5  -3  240.88   15.00
  -3  -5  -3  115.09   14.90
   3   5  -3   66.69   15.60
  -3   5   3   81.69   11.20
  -3   5   3   84.99    6.60
  -3   5  -3   72.49   10.80
  -3   5  -3   96.19    9.80
   3   5   3   90.19    6.30
  -4   5   3  125.29   15.70
  -4  -5  -3  125.99   16.10
   4   5   3  122.69    8.40
  -4   5  -3  136.19   15.20
  -4  -5   3  165.68   23.60
  -4   5  -3  135.99   13.40
  -5  -5  -3    8.70   16.80
  -5  -5  -3   19.50    7.60
  -5   5   3   13.90    6.20
  -5  -5   3   12.10    6.90
  -5   5  -3   25.80    6.90
  -5  -5   3   17.50   16.00
  -6   5   3   11.20    3.40
  -6  -5  -3   17.40   15.80
  -6   5   3    4.20    4.00
  -6   5   3   12.40    2.30
  -6   5   3   10.20    1.00
  -6   5   3   11.20    1.70
  -6  -5  -3   10.80    1.20
  -6  -5   3   15.50    1.80
  -6  -5   3    9.10    1.20
  -6  -5   3    7.70    1.20
  -6  -5   3   -2.50    6.90
   6   5   3   11.30    2.80
  -6   5  -3    2.70    5.10
  -6   5  -3   13.10    2.20
  -6  -5   3   11.50    1.60
  -6  -5   3   25.20   21.00
  -7   5   3   34.80    2.90
  -7  -5  -3   32.80    2.10
  -7   5   3   29.80    2.30
  -7   5   3   22.80   10.20
  -7   5   3   32.80    1.80
  -7  -5  -3   24.10   10.40
  -7  -5  -3   28.60    1.90
  -7   5   3   30.10    1.90
  -7  -5  -3   32.50    2.00
  -7   5   3   39.10    3.70
  -7   5   3   35.70    4.60
  -7  -5  -3   27.80   12.70
   7   5   3   37.50    5.60
  -7   5  -3   31.20    2.90
  -7  -5   3   29.00    8.60
  -7  -5   3   29.10   15.20
  -7  -5   3   31.60    2.20
  -7   5  -3   32.10    3.40
  -7  -5   3   32.30    2.40
  -7   5  -3   27.30    8.90
  -7  -5   3   30.90    2.30
  -7   5  -3   31.20    4.00
  -7  -5   3   30.20    2.20
  -8   5   3   11.80    1.40
  -8  -5  -3   14.30    1.50
   8   5  -3   12.40    4.70
  -8   5   3   13.60    1.20
  -8   5   3   14.40    3.40
  -8   5   3   15.90    2.40
  -8   5   3   18.90    3.10
  -8   5   3   18.60    2.20
  -8  -5  -3   11.40    1.30
  -8   5   3    3.70    9.70
  -8  -5   3   15.30    1.60
  -8   5  -3   12.30    2.50
  -8  -5   3   12.30    1.50
  -8  -5   3   14.10    1.70
  -8  -5   3   11.00    1.50
   8   5   3   13.10    3.50
  -8   5  -3   15.20    1.60
  -8   5  -3   13.40    2.80
  -9  -5  -3  140.89    6.10
  -9   5   3  131.79    8.10
  -9   5   3  127.59   21.20
  -9  -5  -3  144.69    6.40
  -9   5   3  150.88   10.20
  -9   5   3  144.29    5.90
  -9  -5  -3  135.39    6.10
   9   5  -3  125.39   12.20
  -9   5   3  140.79    7.20
  -9   5   3  146.09    6.40
  -9  -5   3  141.09    6.40
  -9  -5   3  139.39    6.60
   9   5   3  143.69   10.90
  -9   5  -3  145.89    6.40
  -9  -5   3  136.49    6.50
  -9  -5   3  135.19    6.50
  -9   5  -3  152.68    8.70
  -9   5  -3  137.69    7.90
 -10   5   3  119.89    5.30
 -10   5   3  114.29    8.50
 -10   5   3  115.89    7.20
 -10   5   3  117.59    4.90
 -10   5   3  123.99    6.10
 -10  -5  -3  110.39    5.30
 -10  -5  -3  111.79    5.10
 -10  -5   3  114.29    5.40
 -10  -5   3  112.69    5.60
 -10   5  -3  113.39    6.70
 -10   5  -3  122.69    7.00
 -10  -5   3  111.19    5.40
 -10  -5   3  119.89    5.60
 -11  -5  -3   18.60    1.50
 -11   5   3   20.00    3.00
 -11   5   3   19.60    1.90
 -11   5   3   20.20    1.40
 -11   5   3   20.00    3.50
 -11  -5  -3   18.50    1.30
 -11   5  -3   17.00    2.00
 -11  -5   3   16.70    1.50
 -11  -5   3   16.50    1.60
 -11  -5   3   17.30    1.60
 -11   5  -3   17.60    2.50
 -12   5   3   49.90    4.00
 -12  -5  -3   52.69    2.50
 -12   5   3   51.39    3.70
 -12   5   3   48.10    2.80
 -12  -5   3   53.69    2.60
 -12  -5   3   47.00    2.60
 -12  -5   3   50.29    2.40
 -12   5  -3   55.09    3.00
   0   6  -3  303.47   26.10
   0   6   3  306.97   13.40
   0  -6  -3  290.37   26.20
   1   6  -3   15.20    7.40
  -1   6   3   11.30    3.70
  -1  -6  -3   30.90    9.80
  -1   6   3   15.30    1.90
  -1   6  -3   12.00    7.40
  -1   6  -3   17.20    1.90
   1  -6  -3   17.50   10.60
   1   6   3   17.40    2.30
  -2   6   3   87.89   10.90
  -2  -6  -3   98.19   15.30
   2   6  -3  103.19   16.30
  -2   6   3   87.49    6.10
   2   6   3   93.39    6.30
  -2   6  -3  101.19   14.30
  -2   6  -3   84.89    8.90
   2  -6  -3   89.59   18.60
  -3  -6  -3    4.70    3.80
  -3   6   3    6.10    4.00
  -3   6   3    7.40    2.30
  -3   6  -3    8.00    3.10
  -3   6  -3    1.90    5.60
   3   6   3    5.20    1.80
  -4  -6  -3   21.50    8.50
  -4   6   3   -1.70    3.30
   4   6   3    3.40    1.90
  -4   6  -3    0.90    3.40
  -5   6   3   -3.10    3.80
  -5   6   3   -0.80    1.60
  -5  -6  -3   -0.40    5.80
  -5  -6   3   -1.60    5.70
  -5   6  -3   -1.80    4.50
   5   6   3   -0.10    1.00
  -5  -6   3    1.40    0.60
  -5   6  -3    4.20    1.30
  -6  -6  -3   67.49   13.60
  -6  -6  -3   49.50    2.60
  -6  -6  -3   54.49    2.90
  -6   6   3   59.69    4.50
  -6   6   3   54.39   14.00
  -6   6   3   56.99    5.10
  -6  -6  -3   53.99    2.80
  -6   6   3   59.09    5.80
   6   6  -3   46.30    2.30
  -6  -6   3   45.30   13.40
  -6  -6   3   49.90    2.90
  -6   6  -3   54.89    4.20
  -6  -6   3   48.20    2.90
  -6   6  -3   55.29   16.50
   6   6   3   52.19    2.30
   6   6   3   65.99    6.40
  -6  -6   3   52.69    2.90
  -6  -6   3   54.79    3.10
  -7  -6  -3   76.59   34.60
  -7   6   3    3.90    1.80
  -7   6   3    1.40    1.90
  -7  -6  -3    1.00    0.50
   7   6  -3    1.60    2.20
  -7  -6  -3    0.90    8.80
  -7  -6  -3    0.50    0.60
  -7   6   3    2.20    0.80
  -7   6   3    6.50    7.20
  -7   6   3    0.60    0.40
   7   6  -3    0.80    0.40
  -7   6   3    0.30    0.90
  -7  -6   3   -9.40    5.70
  -7  -6   3   -1.50   17.10
  -7   6  -3    0.40    1.40
  -7  -6   3    0.00    0.60
  -7   6  -3    4.90    7.80
  -7  -6   3    1.80    0.60
  -7  -6   3    1.90    0.70
  -7  -6   3    0.20    0.70
  -7   6  -3    0.10    1.60
   7   6   3    0.90    1.70
  -8   6   3   19.70    3.40
  -8   6   3   18.70    1.30
  -8   6   3   19.70    2.30
  -8   6   3   19.40    1.60
  -8   6   3   18.70    4.10
  -8   6   3    9.20   10.70
   8   6  -3   13.20    4.30
  -8  -6  -3   17.50    1.40
  -8  -6  -3   18.90    1.70
   8   6   3   16.00    4.00
  -8  -6   3   17.70    1.70
  -8   6  -3   16.10    2.70
  -8  -6   3   17.30    1.60
   8   6   3   15.50    1.00
  -8  -6   3   16.80    1.80
  -8   6  -3   17.30    3.30
  -8  -6   3   18.50    1.80
  -9   6   3    0.60    1.90
  -9   6   3   -0.40    1.50
   9   6  -3    4.70    4.70
  -9   6   3    0.30    0.50
  -9   6   3    0.50   11.70
  -9   6   3    0.30    0.80
  -9  -6  -3    0.20    0.60
  -9  -6  -3    0.40    0.40
   9   6   3    5.10    2.90
  -9  -6   3    0.40    0.50
  -9  -6   3    0.40    0.60
  -9   6  -3    1.70    1.30
  -9   6  -3   -0.90    1.40
  -9  -6   3    0.30    0.70
 -10   6   3   -0.30    0.40
 -10   6   3    1.40    1.70
 -10   6   3    1.10    0.70
 -10  -6  -3    0.00    0.40
 -10  -6  -3    0.30    0.50
 -10   6   3    0.50    1.70
 -10   6  -3    1.30    1.30
 -10  -6   3    0.30    0.50
 -10   6  -3    0.30    1.10
 -10  -6   3    0.00    0.60
 -10  -6   3    0.00    0.60
 -11   6   3   -0.70    1.30
 -11  -6  -3   -0.30    0.40
 -11   6   3    0.00    0.60
 -11   6   3    0.40    1.50
 -11  -6  -3    0.40    0.40
 -11   6  -3    1.10    1.90
 -11  -6   3    0.50    0.60
 -11  -6   3    0.40    0.50
 -11  -6   3    0.70    0.60
 -12   6   3   35.10    2.90
 -12  -6  -3   31.50    2.10
 -12   6   3   33.90    3.10
 -12  -6   3   31.70    1.90
 -12  -6   3   32.00    1.90
 -12   6  -3   33.00    2.10
   0  -7  -3   18.90    9.50
   0   7  -3    3.60    5.10
   0   7  -3    1.30    1.00
   1   7  -3   12.10    2.70
   1   7  -3   11.20    6.40
  -1  -7  -3    9.30    9.00
  -1   7   3   18.70    2.10
  -1   7  -3   16.70    1.80
   1   7   3   14.40    2.30
  -1   7  -3   13.50    7.90
   1  -7  -3   21.40   10.50
  -2   7   3    2.60    1.50
  -2  -7  -3   10.60    7.10
  -2   7   3    1.50    2.40
  -2   7  -3    7.10    3.40
  -3   7   3  185.88   11.40
  -3  -7  -3  213.38   24.40
  -3   7  -3  195.98   17.80
   3   7   3  203.28   11.40
  -4  -7  -3  321.97   30.60
  -4   7   3  275.67   26.60
  -4   7   3  302.07   15.50
  -4   7   3  273.77   12.70
  -4   7  -3  300.37   24.70
  -4   7  -3  264.47   12.80
   4   7   3  281.77   15.30
  -4  -7   3  333.37   32.00
   4   7   3  258.87   10.70
   5   7  -3   45.60    6.10
  -5   7   3   53.99    3.90
  -5   7   3   46.00   13.30
  -5   7   3   52.49    5.70
  -5   7   3   42.40    3.90
  -5  -7  -3   34.50   13.30
   5   7   3   49.40    2.50
  -5  -7   3   42.50   13.50
   5   7   3   46.30    5.20
  -5   7  -3   36.10   10.60
  -5   7  -3   45.10    4.00
  -6  -7  -3    7.40    1.20
  -6   7   3    8.80    1.60
   6   7  -3    6.60    0.60
  -6   7   3    9.30    2.90
  -6   7   3   11.30    2.50
  -6   7   3    4.50    5.30
   6   7  -3    9.20    3.60
  -6  -7  -3   -1.90    8.30
   6   7   3    4.70    2.00
  -6   7  -3   -1.50    8.80
  -6  -7   3    5.20    7.50
   6   7   3    7.50    0.60
  -6   7  -3    5.10    2.70
  -6   7  -3   10.30    2.20
  -6  -7   3    6.80    1.10
  -6  -7   3    5.10    0.90
  -6  -7   3    7.80    1.30
  -7   7   3   33.00   13.90
  -7  -7  -3   31.30   11.60
   7   7  -3   28.10    1.70
  -7  -7  -3   27.10    1.80
  -7  -7  -3   31.00    2.10
  -7   7   3   30.40    3.70
   7   7  -3   29.30    5.90
  -7   7   3   31.50    5.00
  -7   7  -3    1.80   13.00
  -7  -7   3   28.40    2.00
   7   7   3   29.50    5.10
  -7   7  -3   37.70    4.30
  -7  -7   3   27.50    2.30
  -7  -7   3   31.30    2.20
  -7  -7   3   32.50   12.40
  -8  -7  -3   97.39    4.40
  -8   7   3  106.29    8.50
  -8  -7  -3   98.89    4.80
  -8   7   3   68.99   19.20
   8   7  -3   84.29   10.60
   8   7  -3   96.59    4.00
  -8  -7  -3   79.99   14.90
  -8   7   3  112.59    5.60
  -8  -7  -3   70.49   14.90
  -8   7   3   97.99    6.70
   8   7   3   97.69    4.00
   8   7   3  100.79    9.20
  -8  -7   3   98.49    4.70
  -8   7  -3  107.19    6.60
  -8  -7   3   98.39    4.80
  -8  -7   3   99.29    5.00
  -8   7  -3  104.89    6.80
  -9   7   3   17.30    4.00
  -9  -7  -3   18.80    1.70
  -9   7   3   18.50    4.90
   9   7  -3   17.40    1.30
  -9  -7  -3   19.70    1.40
  -9   7   3   16.50    1.90
  -9   7  -3   18.40    3.10
  -9  -7   3   17.40    1.40
  -9  -7   3   23.50    3.60
  -9  -7   3   17.30    1.60
   9   7   3   18.10    0.90
 -10  -7  -3   37.90    2.30
 -10   7   3   33.50    3.80
 -10  -7  -3   37.20    1.90
 -10   7   3   36.00    4.40
 -10   7   3   36.70    2.50
 -10  -7   3   38.90    2.30
 -10  -7   3   36.20    2.50
 -10  -7   3   37.50    2.10
 -10   7  -3   38.70    3.60
 -11   7   3    3.90    1.70
 -11   7   3    5.50    0.90
 -11   7   3    4.50    2.30
 -11  -7  -3    4.20    0.70
 -11  -7   3    5.30    0.80
 -11   7  -3    5.20    1.40
 -11  -7   3    5.70    1.10
 -12  -7  -3    0.70    0.30
 -12   7   3    0.40    0.70
 -12   7   3    0.80    1.00
 -12  -7   3    0.70    0.30
 -12  -7   3    0.10    0.30
   0  -8  -3  443.66   40.50
   0   8  -3  490.25   21.60
   0   8   3  527.75   21.50
   0   8   3  493.75   30.00
  -1   8   3   -0.30    0.90
   1   8  -3    1.30    0.40
  -1  -8  -3    1.30    0.30
  -1   8   3    1.30    2.40
  -1  -8  -3    9.20    9.60
   1   8  -3    0.20    1.40
  -1   8  -3    1.40    0.90
   1  -8  -3    1.80   14.20
   1   8   3    0.90    0.80
  -2  -8  -3   -4.00    6.10
  -2   8   3    2.00    1.80
   2   8  -3    0.60    0.20
  -2   8   3    1.60    3.30
   2   8  -3    1.30    1.20
  -2  -8  -3    0.10    0.20
   2   8   3   -0.90    1.20
  -2  -8   3    0.00    0.20
   2   8   3    0.20    0.20
  -2   8  -3   -1.30    1.80
  -3   8   3   21.50    8.40
  -3  -8  -3   16.80    0.90
  -3  -8  -3   22.30   10.80
   3   8  -3   18.00    3.60
   3   8   3   22.70    3.50
  -3   8  -3   16.90    6.10
  -3  -8   3   14.60   10.80
   3  -8  -3   15.20    0.90
  -3  -8   3   18.10    1.00
  -4   8   3  373.36   32.50
   4   8  -3  352.36   13.50
   4   8  -3  369.06   20.50
  -4   8   3  372.06   15.90
  -4  -8  -3  335.47   13.30
  -4   8   3  404.96   19.10
  -4  -8  -3  441.86   40.40
  -4  -8   3  417.46   38.50
   4   8   3  361.06   18.50
   4   8   3  354.36   13.50
  -4  -8   3  323.97   14.00
  -4  -8   3  341.77   13.40
  -4   8  -3  354.26   15.90
   4  -8  -3  334.47   13.50
  -4   8  -3  365.26   29.90
   5   8  -3   17.60    1.00
   5   8  -3   16.60    4.20
  -5  -8  -3   16.80    1.50
  -5   8   3   22.50    3.20
  -5   8   3   19.10    4.10
  -5   8   3   21.20    9.40
  -5  -8  -3   18.90   13.90
   5  -8  -3   13.60    1.00
  -5   8  -3   23.20    3.50
  -5   8  -3    8.80    8.20
   5   8   3   19.90    3.80
  -5  -8   3   22.80   14.20
   5   8   3   16.50    1.00
  -5  -8   3   15.10    1.40
   6   8  -3   85.69    9.30
  -6   8   3   90.09    4.90
  -6   8   3   75.89    5.80
  -6  -8  -3   43.50   15.20
  -6   8   3   93.29    8.00
  -6   8   3   74.49   18.60
   6   8  -3   81.39    3.80
  -6  -8   3   80.69    4.30
  -6  -8   3   71.69   20.10
  -6   8  -3   69.49   18.40
   6  -8  -3   74.29    3.30
  -6   8  -3   89.79    6.10
   6   8   3   80.79    7.50
  -6  -8   3   79.49    4.50
  -7   8   3   34.40    2.80
   7   8  -3   28.10    6.00
  -7   8   3    5.20   11.90
   7   8  -3   33.40    1.70
  -7  -8  -3   35.10    2.30
  -7   8   3   37.00    5.30
  -7   8   3   39.20    4.10
  -7  -8   3   33.90    2.60
  -7  -8   3   18.20   13.00
   7   8   3   33.70    5.20
  -7  -8   3   34.90    2.30
   7   8   3   33.70    1.60
  -7   8  -3   39.50    4.00
   8   8  -3   37.80    1.80
  -8  -8  -3   36.30    2.40
  -8  -8  -3   36.30   13.80
   8   8  -3   27.90    5.90
  -8   8   3   43.80    5.40
  -8   8   3   40.10    3.30
  -8   8   3   40.20    4.30
   8   8   3   32.50    6.30
  -8   8  -3   40.60    4.00
   8   8   3   37.90    1.80
  -8  -8   3   36.30    2.60
  -8  -8   3   37.60    2.40
  -9  -8  -3    7.80    1.00
  -9   8   3    8.70    2.30
   9   8  -3    7.60    0.70
  -9  -8  -3    9.10    1.20
  -9   8   3    7.20    2.50
  -9   8   3    7.00    1.20
  -9   8  -3    9.10    2.30
  -9  -8   3    7.60    0.90
   9   8   3    8.80    0.60
  -9  -8   3    9.40    1.40
  -9  -8   3    9.40    1.10
 -10   8   3   12.90    2.50
 -10   8   3   12.90    2.80
 -10  -8  -3   13.60    1.20
 -10  -8   3   15.20    1.30
 -10  -8   3   11.90    1.40
 -10   8  -3   15.60    2.40
 -11   8   3    1.50    1.30
 -11   8   3    1.50    1.40
 -11  -8  -3    2.20    0.60
 -11  -8   3    2.10    0.60
 -11  -8   3    2.30    0.40
 -11   8  -3    2.40    1.10
   0  -9   3   33.40   17.10
   0   9   3    0.90    1.30
   0  -9   3    0.00    0.30
   0   9   3    0.50    3.50
   0  -9  -3  -10.70   11.50
   0  -9  -3    0.20    0.20
   0   9  -3    0.90    1.50
  -1  -9  -3   -3.90   11.80
  -1  -9  -3    4.90    0.50
   1  -9   3    5.70    0.60
   1   9  -3    6.10    0.60
   1  -9   3   -0.10   22.80
  -1   9   3    8.10    2.20
  -1   9   3    7.00    5.60
   1   9  -3    2.70    2.10
   1  -9  -3    5.80    0.60
  -1  -9   3    6.10    0.60
   1   9   3    5.80    0.60
  -1  -9   3    7.40    9.80
  -1   9  -3    5.70    0.70
   1   9   3    6.50    1.90
  -2   9   3   -1.30    4.10
  -2   9   3    1.70    0.30
  -2  -9  -3    2.30    0.40
  -2   9   3    2.90    3.20
   2   9  -3    1.60    0.30
   2   9  -3    2.50    1.90
  -2  -9  -3   20.00   12.40
  -2  -9   3    2.30    0.40
   2  -9  -3    2.40    0.40
   2   9   3    2.50    0.40
  -2   9  -3    3.80    3.80
  -2   9  -3    1.80    0.30
  -2  -9   3    4.70   11.60
   2   9   3    2.30    1.50
   3   9  -3    4.90    2.50
  -3  -9  -3    7.90    0.60
  -3  -9  -3    7.40   12.00
   3   9  -3    8.60    0.70
   3  -9  -3    6.00    0.60
  -3  -9   3    6.00    0.90
  -3  -9   3    6.40    0.60
   3   9   3   10.10    2.50
  -3   9  -3    9.90    6.00
  -3  -9   3   17.40   12.90
   3   9   3    6.50    0.60
   4   9  -3   76.89    3.20
  -4   9   3   74.89    5.30
  -4  -9  -3   65.49   19.20
  -4  -9  -3   71.79    3.70
   4   9  -3   80.69    7.50
  -4   9   3   84.79    7.40
  -4   9   3   80.49   17.80
  -4  -9  -3   75.89    3.00
  -4   9  -3   59.99   15.00
  -4  -9   3   72.99    3.60
  -4  -9   3   73.99    3.00
   4  -9  -3   73.99    3.10
   4   9   3   73.99    3.10
  -4  -9   3  103.39   24.30
  -4   9  -3   80.69    5.50
   4   9   3   75.59    6.70
  -5   9   3   26.30   12.40
  -5  -9  -3    6.80    1.60
  -5   9   3    4.30    2.00
  -5   9   3    2.10    2.50
   5  -9   3    4.00    0.70
   5   9  -3    4.10    0.50
   5  -9  -3    4.60    0.60
   5   9   3    3.90    2.20
  -5  -9   3    3.30   12.20
   5   9   3    5.20    0.60
  -5   9  -3    5.20    2.00
  -5  -9   3    3.50    0.80
  -6   9   3   24.20   14.10
  -6  -9  -3   25.50    1.90
   6  -9   3   26.20    1.40
  -6   9   3   29.50    4.90
   6   9  -3   26.70    1.40
  -6   9   3   27.50    3.80
  -6  -9  -3   32.10   15.50
   6   9  -3   19.20    5.40
  -6   9  -3    5.90   17.90
  -6  -9   3    7.00   16.00
  -6  -9   3   24.40    2.20
   6  -9  -3   25.10    1.30
  -6  -9   3   26.80    2.00
  -6   9  -3   32.60    3.80
   6   9   3   28.80    1.40
   6   9   3   27.70    4.40
   7  -9   3    0.40    0.30
  -7   9   3    0.20    1.70
  -7  -9  -3    0.80    0.60
   7   9  -3    8.00    3.60
  -7  -9  -3    4.60   15.20
   7   9  -3    0.70    0.30
  -7   9   3   29.90   17.50
  -7   9   3    0.20    1.80
  -7  -9   3    0.50    0.70
   7   9   3    0.30    0.30
  -7   9  -3    1.60    1.70
  -7  -9   3    0.90    0.50
  -7  -9   3   -6.70   12.60
   7  -9  -3    1.00    0.40
   8   9  -3    0.30    0.30
  -8   9   3    2.30    1.80
  -8  -9  -3    0.00    0.50
  -8   9   3   -0.30    1.70
  -8  -9   3    0.50    0.60
  -8  -9   3   -0.20    0.40
   8   9   3    1.20    0.30
  -8   9  -3    0.80    1.50
  -9  -9  -3    0.10    0.40
  -9   9   3    1.20    1.60
   9   9  -3   -0.70    0.30
  -9   9   3    0.10    1.40
  -9  -9   3    0.60    0.60
  -9   9  -3    0.10    1.30
  -9  -9   3    0.40    0.50
 -10   9   3    0.70    1.40
 -10  -9  -3    3.00    0.60
 -10   9  -3    2.20    1.30
 -10  -9   3    1.30    0.90
 -10  -9   3    2.10    0.60
 -11   9   3    1.90    0.90
 -11   9   3    3.90    1.20
 -11  -9  -3    3.40    0.50
 -11   9  -3    2.30    0.90
 -11  -9   3    3.50    0.60
   0 -10  -3  275.37   42.70
   0  10   3  170.28   10.20
   0  10   3  179.88   19.50
   0  10  -3  174.38    6.80
   0 -10  -3  172.18    6.70
   0  10   3  174.38    6.70
   0 -10   3  146.99   40.20
   0 -10   3  174.68    6.80
   1 -10   3    3.50    0.50
   1  10  -3    4.20    0.60
  -1  10   3    0.20    3.60
  -1 -10  -3   65.19   26.10
   1  10  -3    3.40    2.10
  -1  10   3    2.90    0.40
  -1 -10  -3    3.10    0.40
   1  10   3    2.90    1.90
  -1  10  -3    3.70    4.40
  -1 -10   3    2.60    0.40
   1  10   3    0.90    4.10
  -1  10  -3    3.80    0.50
  -1 -10   3  -14.30   17.80
   1  10   3    3.40    0.50
   1 -10  -3    4.30    0.60
  -2  10   3   -4.70    5.40
   2 -10   3    3.70    0.50
   2  10  -3    3.00    0.40
  -2 -10  -3  -21.10   13.00
   2  10  -3    1.70    2.20
  -2 -10   3   16.20   19.70
   2  10   3    3.30    0.40
   2  10   3    1.70    1.70
  -2  10  -3    3.30    0.40
  -2  10  -3    5.90    4.80
  -3  10   3   23.20   11.40
   3  10  -3   17.40    3.80
   3 -10   3   24.20    1.70
  -3 -10  -3   34.20   18.40
   3  10  -3   20.80    1.30
  -3 -10  -3   21.90    1.10
   3  10   3   19.40    3.70
  -3 -10   3   22.10    1.10
  -3 -10   3   30.20   19.10
   3  10   3   22.90    1.30
   3 -10  -3   22.30    1.40
   4 -10   3   15.20    1.00
  -4 -10  -3   14.70    1.40
   4  10  -3   16.60    3.90
   4  10  -3   15.30    1.00
  -4  10   3   16.50    3.00
  -4 -10  -3   17.00    0.90
  -4  10   3   11.20    9.10
  -4  10   3   17.20    3.90
  -4 -10  -3   30.10   18.10
  -4  10  -3   16.70    3.10
  -4 -10   3   13.90    1.50
  -4  10  -3   -2.50    8.20
  -4 -10   3   40.60   16.30
   4  10   3   14.90    1.00
   4  10   3   12.20    2.90
   4 -10  -3   15.40    1.00
   5 -10   3   13.00    0.90
  -5  10   3   12.80    3.60
  -5 -10  -3   11.50    1.30
   5  10  -3   14.70    4.10
  -5  10   3   11.30    2.60
   5  10  -3   12.10    0.90
  -5 -10   3   12.80    1.40
  -5 -10   3   46.80   19.60
  -5  10  -3    7.70    2.20
  -5  10  -3   26.30   17.10
   5  10   3   12.70    0.90
  -5 -10   3   12.00    1.60
   5 -10  -3   11.70    0.80
   6  10  -3    0.80    0.30
  -6  10   3   -0.40    1.30
  -6  10   3   -5.30   14.30
  -6 -10  -3    1.10    0.60
  -6  10   3    0.40    1.90
  -6 -10  -3   -9.30   15.50
   6  10  -3    1.30    3.10
   6  10   3    3.80    2.40
  -6 -10   3   -0.30    0.60
  -6  10  -3    3.20    1.90
  -6 -10   3    0.10    0.70
  -6 -10   3   -0.70   15.10
  -7  10   3   66.79    5.50
  -7 -10  -3   31.60   19.80
  -7 -10  -3   75.79    3.70
   7 -10   3   67.79    3.00
  -7  10   3   72.29    6.70
   7  10  -3   72.29    3.10
   7  10   3   76.29    3.10
  -7  10  -3   78.89    5.50
  -7 -10   3   82.59   23.20
  -7 -10   3   71.09    3.50
   7 -10  -3   72.89    3.00
  -7 -10   3   74.09    3.90
  -8  10   3   85.39    6.00
   8  10  -3   86.29    3.60
  -8  10   3   91.69    7.00
  -8 -10  -3   90.29    4.20
  -8  10  -3   92.09    5.80
  -8 -10   3   89.99    4.50
  -8 -10   3   94.09    4.10
   8  10   3   90.69    3.60
   9  10  -3    0.50    0.20
  -9  10   3    0.40    1.30
  -9 -10  -3    0.20    0.40
  -9  10   3    0.60    1.30
  -9 -10   3    0.80    0.60
  -9  10  -3    0.30    1.20
 -10  10   3    6.20    1.50
 -10 -10  -3    7.50    0.70
 -10  10   3    7.30    1.50
 -10  10  -3    9.00    1.60
 -10 -10   3    8.40    1.00
   0  11   3    7.50    6.50
   0  11  -3    2.40    3.40
   1 -11   3   30.70    1.60
  -1  11   3   23.50    9.00
  -1 -11  -3   30.70    1.50
  -1 -11  -3  -14.50   26.50
  -1  11   3   29.30    1.40
   1  11  -3   29.70    1.50
   1  11   3   28.90    9.60
   1  11   3   31.30    1.50
   1 -11  -3   28.90    1.50
  -1  11  -3   35.40   10.00
  -1 -11   3   30.00    1.50
   1  11   3   30.30    5.40
  -1 -11   3   35.40   26.60
  -1  11  -3   30.40    1.50
  -2  11   3    6.20    6.30
   2  11  -3    3.50    0.50
  -2 -11  -3   27.70   21.90
   2  11  -3   -3.30    3.20
  -2 -11  -3    3.00    0.40
   2 -11   3    2.90    0.50
  -2  11  -3   -0.80    6.60
   2 -11  -3    3.00    0.40
   2  11   3    4.60    5.00
   2  11   3    0.80    2.30
  -2  11  -3    2.30    0.40
  -2 -11   3    4.00    0.50
   2  11   3    2.90    0.50
  -3 -11  -3  -21.70   23.50
   3  11  -3    0.60    0.30
   3  11  -3   -0.40    2.70
  -3  11   3   -0.50    1.40
   3 -11   3    0.30    0.30
  -3  11   3  -10.60    6.40
  -3 -11  -3    0.80    0.60
  -3 -11  -3    0.80    0.30
  -3  11  -3   -1.50    8.10
  -3 -11   3    0.50    0.20
   3 -11  -3    0.70    0.30
  -3 -11   3  -12.60   16.50
   3  11   3    0.80    0.30
   3  11   3   -0.50    2.20
  -4 -11  -3    2.90    0.40
   4  11  -3    3.40    0.50
  -4  11   3    2.30    1.70
  -4  11   3    8.30   10.60
  -4 -11  -3  -36.70   21.40
   4  11  -3    8.60    3.40
   4 -11   3    2.70    0.50
  -4  11   3    1.90    2.40
  -4 -11  -3    2.30    0.60
   4  11   3   -1.50    2.60
   4  11   3    2.80    0.50
   4 -11  -3    3.20    0.50
  -4 -11   3   16.40   19.40
  -4  11  -3    2.00    1.50
  -4  11  -3    0.30   13.90
  -4 -11   3    3.30    0.40
  -5  11   3   38.90    4.20
  -5 -11  -3   31.30    2.00
  -5  11   3   -1.30   16.00
   5  11  -3   39.10    8.60
   5 -11   3   32.60    1.60
  -5  11   3   31.30    4.90
   5  11  -3   33.10    1.60
  -5 -11  -3   51.99   23.00
  -5 -11   3   32.90    2.30
   5  11   3   29.80    6.00
  -5 -11   3   41.00   24.30
   5 -11  -3   32.10    1.60
  -5  11  -3   31.10    3.70
   5  11   3   34.10    1.60
  -6  11   3  358.96   18.50
   6  11  -3  383.36   14.10
   6 -11   3  377.06   14.10
  -6  11   3  360.26   16.70
  -6 -11  -3  373.96   14.70
   6 -11  -3  370.36   14.00
  -6  11  -3  371.36   16.70
   6  11   3  383.36   14.10
  -6 -11   3  385.06   15.00
  -7  11   3    6.70    1.90
  -7 -11  -3    5.80    0.90
   7 -11   3    4.70    0.50
  -7  11   3    3.40    2.10
   7  11  -3    4.70    0.60
   7 -11  -3    4.90    0.50
  -7 -11   3    4.50    0.90
  -7  11  -3    5.10    1.80
   7  11   3    5.40    0.60
  -8  11   3   50.99    4.60
  -8 -11  -3   54.19    2.60
   8 -11   3   43.40    2.10
  -8  11   3   57.39    4.30
  -8 -11   3   52.39    2.90
  -8  11  -3   53.19    4.00
   8  11   3   53.79    2.30
  -9  11   3    1.40    1.20
  -9  11   3    0.90    1.30
   9  11  -3    2.20    0.30
  -9 -11  -3    1.20    0.50
  -9  11  -3    4.40    1.60
  -9 -11   3    1.80    0.60
 -10  11   3    0.70    1.10
 -10 -11   3    0.40    0.40
   0  12  -3    6.80    6.40
   0 -12  -3   18.20    1.10
   0  12  -3   18.80    1.10
   0  12   3   18.10    9.80
   0  12   3   20.00    1.10
   0 -12   3   19.90    1.10
   1  12  -3   30.90    1.50
  -1  12   3   25.50   12.00
   1  12  -3   35.30   10.10
   1 -12   3   31.30    1.60
  -1 -12  -3   31.90    1.50
   1  12   3   32.10    1.50
   1 -12  -3   29.90    1.50
   1  12   3   30.60    9.60
  -1  12  -3   27.60   10.70
  -1  12  -3   30.00    1.50
  -1 -12   3   31.50    1.60
  -2 -12  -3  -37.70   31.70
  -2  12   3   -3.10   10.20
   2  12   3    6.90    7.10
   2  12   3   11.60    5.60
  -2  12  -3   -2.00    8.70
  -2 -12   3  -31.00   26.40
  -3 -12  -3   51.69   34.90
  -3  12   3   26.60   11.10
   3  12  -3    2.40    0.40
  -3  12   3    2.30    1.70
  -3 -12  -3    1.90    0.30
  -3  12   3    0.80    2.00
  -3 -12  -3    1.20    0.60
   3 -12   3    1.90    0.40
  -3 -12   3    1.60    0.30
   3  12   3    4.50    5.50
   3 -12  -3    1.40    0.40
  -3 -12   3   10.00   30.20
   3  12   3    1.00    0.30
   3  12   3   19.10    7.70
  -4 -12  -3   29.20    1.30
  -4 -12  -3   30.90    1.90
   4  12  -3   25.80    2.00
  -4 -12  -3  -15.20   26.80
   4 -12   3   30.90    1.60
  -4  12   3   30.00    4.60
   4 -12  -3   32.20    1.60
  -4 -12   3   56.19   48.70
  -4  12  -3   32.00    4.70
  -5  12   3    7.20    2.30
  -5 -12  -3    7.20    1.00
   5  12  -3    6.80    0.70
  -5  12   3    2.80    2.10
   5 -12   3    6.60    0.60
   5 -12  -3    5.10    0.60
   5  12   3    6.40    0.60
  -5 -12   3    6.60    1.20
  -5  12  -3    6.50    2.00
   6  12  -3   76.59    3.20
  -6  12   3   66.39    6.00
   6 -12   3   78.69    3.20
  -6 -12  -3   79.19    3.60
  -6  12   3   77.39    5.60
   6  12   3   80.69    3.20
   6 -12  -3   79.49    3.10
  -6 -12   3   78.29    4.00
  -6  12  -3   73.69    5.20
   7  12  -3    9.80    0.70
  -7  12   3    9.20    2.00
   7 -12   3    9.00    0.60
  -7 -12  -3    8.30    0.90
  -7  12   3    7.20    2.10
  -7 -12   3    7.90    1.20
   7  12   3    9.70    0.70
   7 -12  -3    9.40    0.60
  -7  12  -3    5.80    1.70
   8  12  -3   29.20    1.30
  -8 -12  -3   26.10    1.40
  -8  12   3   31.50    2.90
   8 -12   3   26.20    1.20
  -8 -12   3   28.20    1.80
  -8  12  -3   28.30    2.60
  -9  12   3    1.30    1.00
   9  12  -3    0.90    0.20
  -9 -12   3    1.90    0.60
  -9  12  -3    1.20    0.80
   0 -13   3    0.10    0.30
   0  13  -3   -0.10    0.20
   0 -13  -3   -0.30    0.20
  -1 -13  -3   32.10    1.50
   1 -13   3   32.10    1.60
   1  13  -3   31.70    1.50
  -1  13  -3   30.80    1.40
   1 -13  -3   30.70    1.50
  -1 -13   3   32.10    1.50
   1  13   3   31.30    1.50
  -2 -13  -3    3.60    0.50
  -2 -13  -3    3.50    0.70
   2  13  -3    4.10    0.50
   2 -13   3    3.10    0.50
  -2  13   3    3.60    1.80
  -2  13   3    2.20    2.40
  -2 -13   3    3.80    0.50
   2  13   3    4.30    0.50
   2 -13  -3    3.30    0.40
  -3  13   3    2.00    2.10
  -3 -13  -3    4.00    0.40
   3  13  -3    5.10    0.60
  -3  13   3    5.20    1.80
  -3 -13  -3    4.50    0.80
   3 -13   3    4.80    0.60
  -3 -13   3    4.30    0.40
   3 -13  -3    4.40    0.50
   3  13   3    4.60    0.50
  -3  13  -3    3.60    1.60
   4 -13   3   44.60    1.90
  -4  13   3   31.80    4.40
  -4 -13  -3   40.50    2.40
   4  13  -3   42.00    1.90
  -4  13   3   42.20    4.00
   4 -13  -3   42.80    1.90
   4  13   3   42.90    1.90
  -4  13  -3   44.30    4.00
  -4 -13   3   45.80    2.60
   5  13  -3    0.60    0.30
  -5  13   3    0.00    1.20
  -5  13   3    1.50    1.50
   5 -13   3    0.20    0.20
  -5 -13  -3    0.00    0.50
  -5  13  -3    0.00    1.30
   5  13   3    0.70    0.30
   5 -13  -3    0.60    0.20
  -5 -13   3    0.60    0.60
   6  13  -3   13.90    0.80
   6 -13   3   14.20    0.80
  -6  13   3   14.20    2.40
  -6 -13   3   11.90    1.50
   6 -13  -3   13.50    0.80
   6  13   3   13.40    0.80
   7  13  -3    0.50    0.20
  -7  13   3    0.80    1.20
   7 -13   3    0.00    0.20
  -7  13   3   -0.20    1.10
   7 -13  -3    0.20    0.20
  -7 -13   3    0.00    0.40
  -7  13  -3    1.00    1.00
  -8  13   3    1.70    1.00
  -8  13  -3    2.70    1.00
   0  14  -3    1.70    0.30
   0 -14  -3    1.90    0.30
   0 -14   3    1.20    0.30
  -1  14   3    5.50    2.30
  -1  14   3    6.60    2.00
   1  14  -3    5.50    0.50
   1 -14   3    4.70    0.60
  -1 -14  -3    5.60    0.50
   1 -14  -3    5.50    0.50
  -1 -14   3    5.70    0.50
   2 -14   3   29.10    1.40
   2  14  -3   29.50    1.40
  -2 -14  -3   30.30    1.30
  -2  14   3   33.30    3.40
  -2  14   3   23.00    3.70
   2 -14  -3   28.70    1.40
   2  14   3   28.00    1.30
  -2 -14   3   30.00    1.30
  -2  14  -3   27.30    3.30
   3 -14   3   30.50    1.40
  -3  14   3   20.80    4.30
   3  14  -3   30.10    1.40
  -3  14   3   34.10    3.50
  -3 -14  -3   30.30    1.30
  -3 -14   3   29.90    1.90
  -3 -14   3   29.40    1.20
   3 -14  -3   30.30    1.40
  -3  14  -3   27.70    3.30
   3  14   3   30.20    1.40
   4 -14   3    0.20    0.20
  -4  14   3    0.10    1.10
  -4  14   3    0.10    1.20
   4  14  -3    0.40    0.30
  -4  14  -3   -1.10    1.10
   4  14   3    0.30    0.20
  -4 -14   3   -0.10    0.60
  -5  14   3   13.40    2.20
  -5  14   3    6.90    1.80
   5  14  -3   11.20    0.70
   5 -14   3   10.30    0.60
  -5 -14   3   10.90    1.10
  -5  14  -3    8.40    1.70
   5 -14  -3   11.80    0.70
   6  14  -3   81.09    3.20
   6 -14   3   80.39    3.10
  -6  14   3   82.89    4.70
   6 -14  -3   78.39    3.10
  -6  14  -3   83.69    5.40
  -6 -14   3   80.09    3.90
   7 -14   3    0.30    0.20
   7  14  -3    0.40    0.20
  -7  14  -3    0.50    0.80
  -7 -14   3    0.60    0.30
   0  15   3   -0.50    1.20
   0 -15   3   -0.10    0.30
   0  15   3   -0.10    1.60
   1  15  -3    1.00    0.20
  -1  15   3   -1.30    1.30
  -1  15   3    0.70    1.30
  -1 -15  -3    1.20    0.20
   1 -15  -3    1.20    0.30
  -1 -15   3    1.00    0.20
   2 -15   3    5.90    0.50
  -2  15   3    4.70    1.40
   2  15  -3    5.60    0.40
  -2  15   3    2.50    1.50
  -2 -15  -3    4.90    0.50
   2 -15  -3    5.60    0.50
  -2  15  -3    4.60    1.50
  -2 -15   3    4.50    0.80
  -2 -15   3    4.90    0.40
  -3  15   3    1.70    1.20
   3 -15   3    2.30    0.30
  -3  15   3    2.10    1.20
   3  15  -3    2.20    0.30
   3 -15  -3    2.00    0.30
  -3 -15   3    2.30    0.60
  -3  15  -3    3.80    1.40
   4 -15   3   19.70    0.90
   4  15  -3   18.40    0.90
  -4  15   3   19.70    2.20
  -4 -15   3   18.90    1.20
  -4  15  -3   19.30    2.40
   4 -15  -3   18.70    0.90
   5 -15   3    1.00    0.30
   5  15  -3    0.70    0.20
  -5  15   3    0.40    0.90
   5 -15  -3    0.40    0.30
  -5  15  -3   -0.10    0.90
  -5 -15   3    0.90    0.40
   0 -16   3    4.70    0.60
   0  16  -3    6.90    1.40
   0  16   3    5.20    1.20
   0 -16  -3    5.60    0.40
   0 -16   3    4.80    0.40
  -1 -16  -3    0.20    0.10
  -1  16   3    2.20    0.90
   1 -16   3    0.40    0.20
   1  16  -3    0.80    0.80
  -1 -16   3    0.20    0.30
  -1 -16   3    0.40    0.10
   1 -16  -3    0.40    0.20
  -1  16  -3    1.30    0.90
   1  16   3   -0.40    0.70
   2 -16   3   18.40    0.80
  -2  16   3   18.40    1.90
   2  16   3   18.30    1.80
  -2 -16   3   15.60    1.00
  -2  16  -3   17.70    1.90
   2 -16  -3   17.30    0.80
   3 -16   3    9.80    0.70
  -3  16   3    9.20    1.30
  -3 -16   3    7.00    0.80
   3  16   3    9.20    1.20
  -3  16  -3   10.90    1.40
   0   0   4 1390.06   59.79
   0   0   4 1601.64   57.59
   0   0  -4 1542.25   66.49
  -1   0  -4    6.60    3.90
  -1   0   4    7.10    1.80
  -1   0   4    2.70    1.70
   1   0   4    5.20    0.90
  -2   0   4  130.49   10.10
  -2   0  -4  131.19   12.00
   2   0   4  133.59    6.00
  -2   0   4  134.79   12.10
  -3   0   4   52.49    7.20
  -3   0   4   52.69    7.60
  -3   0  -4   59.39    8.40
   3   0   4   46.00    4.20
   3   0   4   58.19    3.30
  -4   0   4    8.40    3.30
   4   0   4    5.00    1.20
  -4   0  -4    5.50    3.10
  -4   0   4    5.30    3.20
   5   0   4   11.80    1.80
  -5   0  -4   13.80    4.30
  -5   0   4    9.30    3.90
   6   0   4    4.60    1.40
  -6   0   4    3.70    3.00
  -7   0   4  277.47   11.30
  -7   0  -4  266.37   11.20
  -7   0   4  281.17   22.10
  -7   0   4  292.47   11.70
   7   0   4  280.67   13.70
  -7   0  -4  290.17   13.10
  -7   0  -4  277.87   11.60
  -8   0   4   50.79    4.10
  -8   0  -4   51.29    3.80
  -8   0   4   52.49    3.00
  -8   0   4   53.19    2.90
  -8   0   4   42.70    9.50
  -8   0  -4   50.99    2.80
  -8   0   4   50.89    3.60
  -8   0   4   48.20    3.20
  -8   0  -4   53.69    3.20
  -8   0  -4   55.09    4.40
  -8   0  -4   51.29    2.90
  -8   0  -4   54.29    2.90
  -8   0   4   54.19    5.40
  -9   0  -4   87.99    4.30
  -9   0   4   91.29    5.30
  -9   0   4   85.19    4.80
  -9   0   4   87.59    4.40
  -9   0  -4   87.79    4.30
  -9   0  -4   90.59    4.30
  -9   0  -4   97.89    6.10
  -9   0  -4   92.19    4.70
  -9   0   4   87.19    4.50
  -9   0   4   94.49    7.30
  -9   0  -4   86.29    5.20
  -9   0   4   85.89    5.80
 -10   0   4    4.40    1.00
 -10   0   4    3.20    1.00
 -10   0   4    3.10    1.20
 -10   0   4    3.10    1.90
 -10   0   4    3.20    0.80
 -10   0  -4    3.60    0.80
 -10   0  -4    3.70    1.40
 -10   0   4    2.00    1.70
 -10   0  -4    4.10    0.90
 -10   0  -4    3.40    0.80
 -11   0   4   12.20    1.30
 -11   0  -4   12.40    1.30
 -11   0   4   11.00    2.30
 -11   0  -4   11.40    1.20
 -11   0   4   11.50    1.80
 -11   0   4   11.90    1.50
 -11   0   4   11.70    1.70
 -12   0   4   35.00    2.40
 -12   0   4   33.90    2.00
 -12   0   4   31.30    2.50
 -12   0   4   33.30    3.40
 -12   0   4   33.70    2.10
 -12   0  -4   33.60    1.90
 -13   0   4   57.99    3.00
 -13   0   4   55.39    2.70
 -13   0   4   52.49    2.40
   0   1  -4    4.70    2.90
   0  -1   4   -0.70    0.70
   0  -1  -4   -0.40    1.60
   0  -1   4   -0.20    0.80
   0   1   4    0.40    1.20
   0   1   4    0.80    0.60
  -1   1   4 3206.38  119.79
  -1   1   4 3247.07  123.69
  -1  -1  -4 3210.38  129.79
   1   1  -4 3244.28  129.09
   1  -1   4 3304.17  118.69
   1   1   4 3143.29  119.09
  -1  -1   4 3254.07  120.89
   1  -1  -4 2969.10  134.29
   1   1   4 3245.78  117.99
  -1   1  -4 3279.17  128.79
  -1   1  -4 2989.10  117.89
  -2   1   4 2400.26  102.79
  -2   1   4 2776.42  108.19
  -2  -1  -4 2764.92  111.59
   2  -1   4 2671.23   99.99
  -2   1   4 2633.94  109.09
  -2   1  -4 2764.82  110.59
   2   1   4 2787.72  100.49
  -2  -1   4 2860.01  105.39
  -2  -1   4 2675.83  112.79
  -3   1   4    1.00    1.90
  -3   1   4    3.00    3.10
  -3  -1  -4   -1.30    2.40
   3   1   4    0.50    0.50
  -3  -1   4   -0.10    2.00
  -3   1  -4    0.40    0.60
  -3  -1   4   -2.70    3.70
  -3   1  -4    1.80    2.70
  -4   1   4   17.30    4.80
  -4   1   4   36.10    6.40
   4  -1   4   21.20    1.70
  -4  -1  -4   14.30    6.20
  -4  -1   4   17.70    4.60
  -4  -1   4   23.90    6.30
   4   1   4   23.20    2.40
  -4   1  -4   17.10    5.10
  -4   1  -4   23.90    2.80
  -5   1   4  182.38   16.40
  -5  -1  -4  182.88   15.40
   5  -1   4  174.38    8.10
  -5   1  -4  181.18   13.10
   5   1   4  180.08    9.40
  -5  -1   4  172.48   14.30
  -5  -1   4  161.88   11.80
   6  -1   4   41.90    3.00
  -6  -1  -4   42.30    5.90
  -6  -1  -4   35.70    5.20
  -6   1   4   47.40    8.50
  -6  -1   4   37.30    7.10
   6   1   4   40.30    3.90
  -7   1   4  128.59    5.70
   7  -1   4  117.99    6.60
  -7   1   4  126.79    8.80
  -7   1   4  126.89    6.60
  -7   1   4  125.89   15.50
  -7   1   4  123.59    5.60
  -7  -1  -4  133.39    6.60
  -7  -1  -4  131.99    6.30
  -7   1   4  124.29    7.60
  -7  -1  -4  130.99    7.10
  -7  -1  -4  122.49    5.60
  -7   1  -4  129.49    6.00
  -7  -1   4  116.59    6.10
  -7   1  -4  149.88   10.70
   7   1   4  126.89    8.20
  -7  -1   4  122.89   13.50
  -7  -1   4  110.49    7.60
  -7   1  -4  130.79    6.00
  -7  -1   4  129.29    5.70
  -8  -1  -4    7.00    1.10
  -8   1   4    7.20    1.50
  -8  -1  -4    4.90    1.00
  -8  -1  -4    6.70    1.10
  -8   1   4    8.00    1.20
  -8   1   4   13.90    5.50
  -8   1   4    6.90    2.50
  -8  -1  -4    7.50    1.10
  -8   1   4    8.40    1.50
  -8  -1  -4    7.20    1.80
  -8  -1  -4    5.90    1.40
  -8   1   4    4.10    1.70
  -8   1   4    7.70    1.20
  -8   1  -4    6.80    1.80
  -8  -1   4    4.30    1.70
  -8   1  -4    5.00    1.50
  -8  -1   4    7.10    1.10
  -8  -1   4    9.40    1.40
  -8  -1   4    6.60    2.10
  -8  -1   4    6.60    1.30
  -8   1  -4    6.00    0.90
  -8  -1   4    5.70    1.40
  -8   1  -4    7.50    1.10
  -8   1  -4    6.80    1.00
  -8   1  -4    5.80    1.10
  -9   1   4   12.80    1.50
  -9  -1  -4   13.70    1.40
  -9   1   4   14.30    1.50
  -9  -1  -4   14.10    1.50
  -9   1   4   10.40    2.30
  -9   1   4   15.50    3.50
  -9  -1  -4   14.90    1.50
  -9  -1  -4   14.60    2.20
  -9   1   4   14.10    1.80
  -9   1   4   12.50    2.10
  -9   1  -4   12.90    1.40
  -9   1  -4   14.90    2.40
  -9   1  -4   14.40    1.40
  -9  -1   4   12.10    1.50
  -9   1  -4   15.80    1.70
  -9  -1   4   16.80    2.70
   9   1   4    5.30    4.50
  -9  -1   4   12.80    2.00
  -9   1  -4   15.30    1.50
  -9  -1   4   11.20    1.70
  -9  -1   4   13.80    1.60
  -9  -1   4   15.60    3.50
  -9   1  -4   12.60    2.50
 -10   1   4  172.58    7.60
 -10  -1  -4  175.88    7.40
 -10   1   4  174.48    7.50
  10   1  -4  145.79   20.60
 -10   1   4  174.08    9.10
 -10  -1  -4  181.28    7.60
 -10   1   4  172.78    8.00
 -10   1   4  177.18    8.70
 -10   1   4  183.28   11.00
 -10  -1  -4  178.78    7.50
 -10  -1   4  166.58    8.00
 -10  -1   4  170.68    8.70
 -10   1  -4  180.48    8.40
 -10   1  -4  181.18    7.50
 -10  -1   4  172.18    8.50
 -10   1  -4  182.78    7.40
 -10  -1   4  175.08    7.70
 -10  -1   4  178.38   10.40
 -10  -1   4  176.98    7.80
 -11   1   4   45.40    3.40
 -11   1   4   44.40    3.00
 -11   1   4   45.80    4.10
 -11   1   4   47.30    2.70
 -11  -1  -4   46.10    2.50
 -11   1   4   45.90    4.70
 -11  -1  -4   47.40    2.60
 -11   1   4   45.80    2.60
 -11   1  -4   47.70    2.50
 -11  -1   4   46.30    3.00
 -11  -1   4   47.50    3.40
 -11  -1   4   43.50    4.40
 -11  -1   4   43.40    2.60
 -11  -1   4   46.80    2.80
 -12   1   4    0.40    0.50
 -12  -1  -4   -0.10    0.40
 -12   1   4   -0.20    1.10
 -12   1   4    0.20    0.60
 -12   1   4   -0.10    0.70
 -12   1   4   -0.20    0.40
 -12   1   4    0.10    1.40
 -12   1  -4    0.50    0.40
 -12  -1   4    0.10    0.50
 -12  -1   4   -0.30    0.60
 -12  -1   4    0.50    0.50
 -12  -1   4    0.30    0.50
 -13   1   4    0.20    0.50
 -13   1   4   -0.10    0.30
 -13  -1   4    0.60    0.30
 -13  -1   4    0.00    0.40
 -13  -1   4    0.50    0.40
   0   2   4   34.80    2.40
   0   2  -4   44.90    7.20
   0   2   4   30.30    4.00
   0  -2  -4   36.60    6.60
  -1  -2  -4 1909.81   80.29
  -1   2   4 1841.02   74.19
   1   2  -4 1846.42   79.69
   1  -2   4 1594.74   69.09
  -1   2   4 1889.41   69.49
   1  -2  -4 1793.62   79.79
   1   2   4 1837.52   68.39
  -1   2  -4 1925.51   79.29
   2   2  -4  365.56   24.70
  -2   2   4  374.46   23.90
  -2  -2  -4  396.96   25.30
  -2   2   4  382.76   18.10
   2  -2   4  370.46   16.00
  -2   2   4  391.66   22.70
  -2  -2   4  398.96   18.80
   2   2   4  414.86   16.40
  -2   2  -4  393.46   17.00
  -2   2  -4  415.86   24.50
   3  -2   4    9.20    1.20
  -3   2   4    7.10    4.80
  -3  -2  -4   10.10    4.70
  -3   2   4    8.30    3.90
  -3  -2   4    9.80    5.90
   3   2   4    9.40    1.60
  -3  -2   4    9.60    2.80
  -3   2  -4   14.20    2.70
  -3   2  -4   12.60    5.10
  -4  -2  -4  269.97   20.80
   4  -2   4  242.28   10.40
  -4   2   4  269.07   20.40
  -4  -2   4  249.88   16.10
  -4   2  -4  285.57   18.80
  -4   2  -4  248.78   13.60
   4   2   4  257.67   12.40
  -5  -2  -4  144.49   15.20
   5  -2   4  137.09    6.60
  -5  -2  -4  142.59   15.30
  -5   2   4  159.68   16.20
  -5   2  -4  154.18   10.20
  -5  -2   4  152.58   14.50
  -5  -2   4  165.28   12.70
   5   2   4  155.18    8.80
  -5   2  -4  159.68   12.50
  -6   2   4  136.49   15.00
  -6  -2  -4  112.59   12.20
   6  -2   4   99.79    5.20
   6   2   4  118.49    7.80
  -6   2  -4  116.99   10.50
  -7  -2  -4   85.99    4.30
  -7   2   4   93.49    5.70
  -7   2   4   95.19    4.30
  -7  -2  -4   94.39    4.60
  -7   2   4   95.69    5.60
  -7   2   4   97.49    7.20
  -7   2   4   91.19   13.50
  -7   2   4   92.79    4.40
  -7   2   4   93.89    5.30
  -7  -2   4   88.09    4.70
  -7   2  -4   87.09    5.90
  -7   2  -4   92.59    4.20
  -7   2  -4   93.59    4.20
  -7  -2   4   88.89    4.50
  -7  -2   4   94.39    5.10
  -7  -2   4  102.99    6.70
  -7  -2   4   92.49    5.30
  -7  -2   4   97.99    4.80
   7   2   4   93.69    7.20
  -7   2  -4   95.69    4.70
  -7   2  -4   92.19    4.40
  -8  -2  -4  186.48    8.10
  -8   2   4  198.28    8.20
  -8   2   4  197.88    8.10
  -8   2   4  188.28    9.70
  -8  -2  -4  189.98    8.20
  -8   2   4  204.68    9.40
  -8   2   4  155.08   18.00
  -8  -2  -4  190.98    8.60
  -8   2   4  193.38    8.60
  -8   2   4  200.08   11.70
  -8  -2  -4  192.08    8.00
  -8  -2   4  185.48    8.30
  -8   2  -4  191.18    7.90
  -8  -2   4  207.58   11.00
  -8   2  -4  181.38    9.20
  -8   2  -4  199.18    8.10
  -8   2  -4  197.28    8.00
  -8  -2   4  183.68    8.60
  -8  -2   4  191.08    8.30
  -8   2  -4  203.78   10.30
  -8  -2   4  195.98    9.30
  -8  -2   4  192.28    9.00
  -8   2  -4  194.48    8.50
   8   2   4  189.28   11.70
  -9   2   4   26.90    2.30
  -9   2   4   28.40    4.50
  -9  -2  -4   25.00    1.90
  -9   2   4   20.70    8.00
  -9  -2  -4   27.70    2.00
  -9   2   4   25.60    3.50
  -9  -2  -4   26.00    1.90
  -9   2   4   28.80    2.80
  -9   2   4   27.90    2.10
  -9   2   4   26.50    1.90
  -9  -2   4   25.50    2.30
  -9   2  -4   22.50    2.90
  -9  -2   4   23.90    3.10
  -9  -2   4   29.00    2.20
  -9   2  -4   30.00    3.30
  -9  -2   4   27.00    2.20
  -9   2  -4   28.00    1.90
  -9  -2   4   29.60    3.90
  -9   2  -4   27.00    1.90
  -9   2  -4   27.20    2.00
  -9  -2   4   26.50    2.60
  -9   2  -4   27.30    2.20
 -10   2   4   62.19    6.10
 -10  -2  -4   61.99    3.30
 -10   2   4   65.19    3.30
 -10   2   4   62.39    4.30
 -10  -2  -4   63.09    3.20
 -10   2   4   61.79    3.70
 -10   2   4   59.69    4.90
 -10   2   4   63.69    3.40
 -10   2  -4   61.79    3.20
 -10  -2   4   61.79    4.60
 -10  -2   4   60.39    4.00
 -10  -2   4   63.59    5.40
 -10   2  -4   61.09    4.40
 -10  -2   4   59.29    3.70
 -10  -2   4   63.99    3.50
 -10   2  -4   66.59    4.80
 -10   2  -4   61.69    3.20
 -10  -2   4   58.89    3.50
 -11   2   4    3.60    1.20
 -11   2   4    4.50    0.90
 -11   2   4    2.70    1.70
 -11   2   4    4.00    0.70
 -11  -2  -4    3.70    0.80
 -11   2   4    1.40    1.70
 -11   2   4    2.70    0.80
 -11  -2  -4    2.60    0.70
 -11  -2   4    2.90    0.90
 -11  -2   4    3.20    0.80
 -11   2  -4    5.60    1.40
 -11  -2   4    3.20    0.90
 -11   2  -4    2.90    0.70
 -11  -2   4    3.80    1.70
 -11  -2   4    2.90    1.10
 -12   2   4   33.00    2.50
 -12  -2  -4   34.40    1.90
 -12   2   4   33.70    2.30
 -12   2   4   30.70    3.50
 -12   2   4   33.70    3.10
 -12   2   4   33.50    2.20
 -12   2   4   33.50    2.10
 -12  -2   4   32.80    2.00
 -12  -2   4   34.50    2.20
 -12  -2   4   31.40    2.30
 -12  -2   4   32.80    2.10
 -13  -2  -4   21.30    1.10
 -13   2   4   21.40    1.50
 -13  -2   4   20.40    1.20
 -13  -2   4   24.70    2.00
 -13  -2   4   16.40    1.50
   0  -3  -4    4.40    4.70
   0   3   4   -0.20    1.00
  -1   3   4   71.79    4.40
  -1  -3  -4   72.59   10.50
  -1   3   4   71.39    7.30
   1   3  -4   69.59    9.70
  -1   3  -4   68.29    9.30
   1   3   4   72.99    4.20
   1  -3  -4   72.79   10.20
  -2  -3  -4  573.34   33.70
   2   3  -4  505.85   33.30
  -2   3   4  529.55   29.20
  -2   3   4  538.05   45.80
  -2   3   4  528.45   23.70
  -2   3  -4  567.94   24.10
  -2   3  -4  560.14   31.90
   2   3   4  539.35   22.30
  -3   3   4    4.90    2.60
  -3  -3  -4    4.30    4.10
  -3   3  -4    4.00    4.00
   3   3   4    5.10    1.40
  -3  -3   4   11.10    7.50
  -3   3  -4    5.30    2.60
  -4  -3  -4 1028.10   52.69
  -4   3   4  992.40   51.59
  -4   3  -4 1015.90   48.80
   4   3   4  933.61   39.60
  -4  -3   4  992.40   53.49
  -4   3  -4  963.60   43.50
  -5  -3  -4    3.20    4.40
  -5   3   4   -2.10    2.90
  -5  -3  -4  -11.00    6.70
  -5   3  -4    5.00    2.90
  -5  -3   4    3.20    6.30
  -5   3  -4    1.50    2.70
   5   3   4    1.50    1.20
  -6   3   4   13.30    3.00
  -6  -3  -4   11.10    5.90
  -6   3   4   18.80    6.90
  -6  -3  -4   19.20    9.80
  -6   3  -4   12.60    3.80
  -6  -3   4    7.50    4.40
  -6  -3   4   17.60    2.10
  -6  -3   4    7.90    6.30
  -6  -3   4   16.90    3.30
   6   3   4   16.10    2.80
  -7   3   4    4.70    6.30
  -7   3   4   13.00    1.50
  -7   3   4   18.30    2.70
  -7   3   4   14.10    1.90
  -7   3   4   13.90    1.70
  -7  -3  -4   13.80    1.20
  -7  -3  -4   11.90    1.30
  -7  -3  -4   12.40    4.20
  -7  -3  -4   14.40    1.30
  -7   3   4   16.00    3.20
  -7   3  -4   14.50    1.50
  -7  -3   4   14.70    1.70
  -7   3  -4   15.70    1.20
  -7  -3   4   13.70    2.00
  -7   3  -4   11.50    2.50
  -7   3  -4   14.20    1.20
  -7  -3   4   12.10    2.40
  -7  -3   4   15.80    1.50
   7   3   4   17.70    3.30
  -7   3  -4   14.70    1.20
  -7  -3   4   14.40    1.40
  -7   3  -4   18.20    2.60
  -7  -3   4    9.50    1.50
  -8   3   4   44.00    2.40
  -8   3   4   38.90    3.90
  -8  -3  -4   39.10    2.40
  -8   3   4   43.60    2.90
  -8   3   4   43.10    2.50
  -8   3   4   42.20    5.30
  -8   3   4   44.60    3.50
  -8  -3  -4   43.10    2.60
  -8  -3  -4   38.50    2.40
  -8   3   4   59.09   13.40
  -8   3  -4   49.70    4.40
  -8  -3   4   39.10    2.80
  -8  -3   4   41.60    4.20
  -8  -3   4   43.50    3.50
  -8   3  -4   43.40    3.80
  -8   3  -4   44.60    2.50
  -8   3  -4   42.00    2.40
  -8   3  -4   45.20    2.80
  -8  -3   4   37.30    2.70
   8   3   4   44.10    5.00
  -8   3  -4   42.50    2.40
  -8  -3   4   40.70    3.10
  -8  -3   4   45.20    2.80
  -9   3   4  107.49   18.60
   9   3  -4  110.19   11.90
  -9   3   4  151.58   10.10
  -9   3   4  149.09    6.10
  -9  -3  -4  136.19    6.10
  -9   3   4  140.79    7.30
  -9  -3  -4  139.49    6.10
  -9   3   4  138.99    6.60
  -9   3   4  143.69    6.20
  -9   3   4  132.29    7.90
  -9  -3  -4  132.39    6.20
  -9  -3   4  138.99    8.40
  -9  -3   4  141.19    6.50
  -9  -3   4  139.39    7.00
  -9  -3   4  134.29    6.60
   9   3   4  139.59   10.20
  -9   3  -4  148.89    8.30
  -9   3  -4  143.29    6.00
  -9  -3   4  135.89    6.40
  -9   3  -4  134.09    7.50
  -9   3  -4  139.99    6.00
  -9   3  -4  142.19    6.50
 -10  -3  -4  146.19    6.30
 -10  -3  -4  149.29    6.50
 -10   3   4  150.38    6.80
 -10   3   4  149.88    7.50
 -10   3   4  147.89   10.00
 -10   3   4  153.08    8.40
 -10   3   4  143.19    6.40
 -10   3   4  148.39    6.20
 -10   3  -4  153.58    8.40
 -10  -3   4  140.99    6.90
 -10  -3   4  145.79    6.70
 -10   3  -4  146.79    6.20
 -10  -3   4  142.69    6.70
 -10  -3   4  147.89    7.20
 -10   3  -4  140.39    7.70
 -10  -3   4  150.08    8.50
 -11   3   4   18.10    2.80
 -11   3   4   16.90    1.60
 -11   3   4   18.00    2.10
 -11   3   4   17.60    1.50
 -11   3   4   18.90    3.50
 -11   3   4   17.80    1.30
 -11  -3  -4   17.30    1.40
 -11  -3  -4   18.50    1.50
 -11  -3   4   18.90    1.70
 -11  -3   4   19.80    1.80
 -11  -3   4   17.10    1.80
 -11  -3   4   17.60    1.90
 -11   3  -4   17.20    2.30
 -12   3   4   18.90    1.40
 -12   3   4   18.90    2.50
 -12  -3  -4   15.00    1.90
 -12   3   4   14.40    2.10
 -12   3   4   17.80    1.20
 -12   3   4   14.50    2.80
 -12  -3   4   18.20    1.60
 -12  -3   4   17.50    1.40
 -12  -3   4   18.80    1.70
 -13  -3  -4    0.00    0.40
 -13  -3   4    0.80    0.40
 -13  -3   4    0.70    0.40
 -13  -3   4    0.70    0.40
   0   4   4   17.40    1.80
   0   4   4   17.60    3.20
   0  -4  -4   25.20    8.90
   0   4  -4   17.00    6.60
  -1   4   4   15.10    1.80
  -1   4   4   11.80    3.50
   1   4  -4    8.50    3.90
  -1  -4  -4   15.90    6.30
  -1   4  -4   19.20    6.60
   1   4   4   13.60    1.80
   1  -4  -4   37.50   10.40
  -2  -4  -4  196.38   18.80
   2   4  -4  193.38   19.60
  -2   4   4  193.98   15.30
  -2   4   4  190.58   10.50
  -2   4  -4  198.78   11.80
   2   4   4  193.68    9.70
  -2   4  -4  201.28   17.90
  -3  -4  -4  843.42   57.89
  -3   4   4  920.31   46.70
   3   4  -4  838.32   50.89
  -3   4   4  798.42   37.60
  -3   4  -4  966.70   48.20
  -3   4  -4  955.50   41.00
   3   4   4  918.71   36.20
  -4  -4  -4   86.39   13.00
  -4  -4  -4   88.69   16.90
  -4   4   4   70.29   11.10
  -4   4  -4   80.69   10.50
  -4  -4   4   95.69   19.00
  -4   4  -4   74.59    8.90
   4   4   4   78.69    5.90
  -5   4   4   86.09   13.40
  -5  -4  -4   94.59   14.40
   5   4   4   90.99    6.70
  -5   4  -4   88.59   10.90
  -5   4  -4   79.79    9.20
  -5  -4   4   96.89   18.10
  -6  -4  -4  157.18   20.20
  -6   4   4  145.59   18.50
  -6  -4  -4  159.88   18.60
  -6   4   4  160.98    7.60
  -6   4   4  147.79    7.80
  -6   4   4  159.98    9.90
  -6  -4   4  150.18   19.80
  -6  -4   4  124.49   15.20
   6   4   4  166.28   10.30
  -6   4  -4  165.78   13.50
  -6   4  -4  157.18    6.30
  -6  -4   4  151.38    6.70
  -6  -4   4  163.08    8.20
  -6  -4   4  146.89    6.70
  -6  -4   4  145.59    6.90
  -7  -4  -4    6.90    0.90
  -7   4   4    7.40    1.00
  -7   4   4    8.60    1.10
  -7   4   4    3.00    6.10
  -7  -4  -4    1.10    7.20
  -7  -4  -4    7.40    1.00
  -7   4   4    7.20    2.70
  -7   4   4    9.40    1.40
  -7  -4  -4    6.10    7.30
  -7   4   4   10.50    2.30
  -7  -4  -4    7.30    0.90
  -7   4   4    9.00    1.80
  -7   4  -4    2.30    5.20
  -7   4  -4    7.30    1.70
  -7  -4   4    6.80    1.30
  -7   4  -4    3.80    1.70
  -7  -4   4    6.40    1.20
  -7  -4   4    7.00    1.30
  -7  -4   4    6.60    1.70
  -7   4  -4    7.40    0.90
  -7   4  -4    6.40    1.10
  -7  -4   4    5.60    0.90
   7   4   4    8.50    2.40
  -8   4   4    0.00    1.80
  -8  -4  -4    3.40    1.10
  -8  -4  -4    3.10    0.90
  -8   4   4    0.20    6.70
  -8   4   4    1.90    0.70
  -8  -4  -4    1.90    0.50
  -8   4   4    2.20    0.60
  -8   4   4    3.00    1.00
  -8   4   4    2.30    1.90
  -8   4  -4    1.90    1.50
  -8   4  -4    3.20    1.70
  -8  -4   4    2.10    1.70
  -8  -4   4    2.90    1.00
  -8  -4   4    2.80    0.90
  -8   4  -4    2.60    0.70
  -8   4  -4    3.00    0.80
  -8  -4   4    1.50    0.90
   8   4   4    2.40    2.20
  -9   4   4   29.70    3.80
  -9   4   4   28.60   11.20
  -9   4   4   27.20    2.80
  -9   4   4   30.20    1.90
  -9   4   4   30.30    2.00
  -9  -4  -4   30.00    2.10
  -9   4   4   29.40    2.30
  -9  -4  -4   28.80    1.90
  -9   4   4   32.10    4.70
  -9  -4   4   26.40    2.30
  -9  -4   4   29.40    2.60
   9   4   4   24.90    4.70
  -9  -4   4   31.80    3.50
  -9  -4   4   28.30    2.30
  -9   4  -4   30.20    3.40
  -9   4  -4   29.40    1.80
  -9   4  -4   31.20    3.50
  -9  -4   4   27.50    2.30
 -10  -4  -4   41.80    2.60
 -10   4   4   43.50    2.30
 -10   4   4   42.80    2.40
 -10  -4  -4   43.30    3.70
 -10   4   4   42.70    2.90
 -10   4   4   43.50    4.10
 -10   4  -4   44.80    3.70
 -10   4  -4   40.10    3.60
 -10  -4   4   44.30    3.40
 -11   4   4   27.00    1.60
 -11   4   4   30.60    2.00
 -11   4   4   26.40    2.40
 -11  -4  -4   27.50    1.80
 -11  -4  -4   28.00    1.70
 -11   4   4   24.90    3.90
 -11   4   4   27.30    3.30
 -11  -4   4   25.40    2.00
 -11  -4   4   26.10    2.00
 -11   4  -4   29.90    2.70
 -11  -4   4   29.10    2.10
 -11  -4   4   28.20    2.20
 -12   4   4    1.50    0.70
 -12   4   4    1.70    1.40
 -12   4   4    1.10    1.30
 -12  -4  -4    1.50    0.40
 -12   4   4    1.70    0.50
 -12  -4   4    1.30    0.50
 -12  -4   4    1.90    0.60
 -12  -4   4    2.00    0.60
 -13  -4  -4    2.80    0.40
 -13  -4   4    2.50    0.40
   0  -5  -4    3.70    6.60
   0   5   4    0.60    0.90
   0   5   4   -0.40    0.50
   0   5  -4    1.20    3.00
   1   5  -4   29.30    8.00
  -1   5   4   40.20    6.50
  -1  -5  -4   38.70   10.10
  -1   5   4   38.40    3.10
   1  -5  -4   51.39   12.40
  -1   5  -4   35.10    9.30
   1   5   4   38.20    3.20
  -2  -5  -4  324.97   26.70
  -2   5   4  294.37   15.60
   2   5  -4  298.47   26.90
  -2   5   4  314.57   21.80
  -2   5  -4  300.97   28.90
   2   5   4  334.47   14.60
   2  -5  -4  283.27   28.20
   3   5  -4   37.00   13.40
  -3  -5  -4   26.00   10.20
  -3   5   4   40.80    7.80
  -3   5   4   33.90    4.30
  -3   5  -4   35.40    6.20
   3   5   4   30.40    3.30
  -3   5  -4   34.70    9.10
  -4   5   4    0.50    2.20
  -4  -5  -4    8.80    6.30
  -4   5  -4    1.70    3.30
   4   5   4    1.00    0.80
  -4   5  -4   -0.90    2.20
  -5   5   4   74.49    8.70
  -5   5   4   74.49   13.60
  -5  -5  -4   61.59   12.60
  -5   5  -4   48.80    9.20
  -5  -5   4   76.19   21.70
  -5  -5   4   68.69    4.40
   5   5   4   58.59    5.60
  -6  -5  -4  115.59    5.20
  -6   5   4  135.99    9.00
  -6  -5  -4  121.99    5.50
  -6   5   4  111.79   17.60
  -6   5   4  126.89    7.00
  -6   5   4  130.39    5.40
  -6  -5  -4  120.39   17.80
  -6   5   4  123.89    6.90
   6   5   4  129.59    9.20
  -6   5  -4  119.59    6.70
  -6  -5   4  145.89   17.00
  -6   5  -4  133.39   14.30
  -6  -5   4  122.09    5.70
  -6  -5   4  118.69    5.80
  -6  -5   4  127.49    5.70
  -6  -5   4  116.49    5.70
  -7  -5  -4   82.09   15.20
  -7  -5  -4   85.09    4.20
  -7  -5  -4   80.69    3.90
  -7  -5  -4   61.09   17.40
  -7  -5  -4   82.39    3.90
  -7   5   4   89.29    5.10
  -7   5   4   86.29    3.90
  -7   5   4   88.89    3.80
  -7   5   4   90.99    7.80
  -7   5   4   89.29    4.40
  -7   5   4   74.89   14.80
  -7   5   4   86.29    5.80
  -7  -5   4   67.09   24.40
   7   5   4   79.79    3.60
  -7   5  -4   81.09    5.40
   7   5   4   91.19    7.80
  -7  -5   4   85.99    4.50
  -7  -5   4   78.99    4.30
  -7   5  -4   86.99    6.30
  -7  -5   4   83.19    4.40
  -7  -5   4   90.39    4.30
  -7  -5   4   73.59   10.90
  -8  -5  -4   37.90    2.50
   8   5  -4   36.00    7.10
  -8   5   4   38.20    3.30
  -8   5   4   38.70    5.40
  -8   5   4   37.70    4.10
  -8  -5  -4   37.20    2.20
  -8   5   4   30.60   11.30
  -8   5   4   39.60    2.60
  -8   5   4   38.50    2.10
  -8  -5   4   35.30    2.60
  -8  -5   4   35.70    2.60
  -8  -5   4   40.20    2.70
   8   5   4   39.20    5.10
  -8   5  -4   40.80    3.80
  -8   5  -4   41.80    2.50
  -8  -5   4   38.60    2.70
  -8   5  -4   39.90    4.10
  -9   5   4   53.09   20.50
  -9   5   4   55.59    2.70
  -9   5   4   54.99    4.80
  -9  -5  -4   51.99    2.80
  -9   5   4   56.29    3.20
  -9   5   4   59.99    6.40
  -9   5   4   52.69    3.80
  -9  -5  -4   54.99    3.10
   9   5  -4   59.89   10.30
  -9  -5   4   52.09    3.20
   9   5   4   63.79    9.00
  -9  -5   4   51.89    3.30
  -9   5  -4   52.79    4.40
  -9  -5   4   50.19    3.20
  -9   5  -4   61.49    4.50
  -9  -5   4   51.99    3.30
 -10   5   4    5.80    1.90
 -10   5   4    9.90    1.00
 -10   5   4    7.60    2.60
 -10   5   4   10.40    1.20
 -10  -5  -4    9.70    1.10
 -10   5   4   11.00    1.70
 -10  -5  -4   10.10    1.20
 -10   5  -4    9.20    1.60
 -10  -5   4    9.70    1.30
 -10   5  -4    8.20    1.80
 -10  -5   4   10.40    1.40
 -10  -5   4   10.90    1.50
 -10  -5   4    9.90    1.30
 -11   5   4   19.80    3.60
 -11   5   4   20.50    2.00
 -11   5   4   23.70    1.90
 -11  -5  -4   20.50    1.50
 -11  -5  -4   19.40    1.30
 -11   5   4   22.30    3.10
 -11  -5   4   20.70    1.70
 -11  -5   4   21.80    1.70
 -11  -5   4   20.40    1.70
 -12  -5  -4   29.90    1.60
 -12   5   4   31.00    2.20
 -12   5   4   32.40    2.90
 -12   5   4   29.00    3.10
 -12  -5   4   28.50    1.80
 -12  -5   4   32.00    1.80
 -12  -5   4   30.90    1.70
   0  -6  -4  288.77   27.80
   0   6   4  279.97   18.20
   0   6   4  280.37   12.60
   0   6  -4  252.67   24.90
  -1  -6  -4    7.70    7.80
   1   6  -4   22.10    8.40
  -1   6   4    5.60    1.40
  -1   6   4    9.50    3.90
  -1   6  -4    5.30    1.30
   1   6   4    6.70    1.60
   1  -6  -4    1.60    9.40
  -2   6   4   60.79    9.70
  -2   6   4   75.99    6.00
   2   6  -4   81.59   16.20
  -2  -6  -4   73.69   14.40
   2   6   4   76.69    5.50
  -2   6  -4   77.39    8.00
  -2   6  -4   80.49   12.70
   3   6  -4  187.08   24.40
  -3   6   4  167.58   17.60
  -3   6   4  151.18   10.70
  -3  -6  -4  194.68   22.10
   3   6   4  174.68   10.00
  -3   6  -4  183.88   20.00
  -3   6  -4  176.68   14.80
  -4  -6  -4   10.40    7.20
  -4   6   4   12.50    5.30
   4   6   4   11.70    2.40
  -4   6  -4   12.30    4.10
  -4   6  -4   13.40    6.50
  -5  -6  -4   77.09   15.60
  -5   6   4   43.40   13.60
  -5  -6   4   43.40    2.50
  -5   6  -4   53.29    9.90
   5   6   4   45.60    4.90
  -5   6  -4   41.20    3.50
  -5  -6   4   38.10   12.00
  -6  -6  -4   95.39    4.60
  -6   6   4  109.09    5.70
   6   6  -4   93.29    4.40
  -6   6   4  114.99    8.60
  -6   6   4  110.69    6.40
  -6  -6  -4  120.39   19.00
  -6  -6  -4  104.29    4.80
  -6   6   4   93.29   17.60
  -6  -6   4   98.89    4.90
  -6  -6   4  100.89    5.00
  -6   6  -4   74.39   13.80
   6   6   4  104.89    4.20
  -6   6  -4  108.19    6.20
   6   6   4  115.99    9.00
  -6  -6   4   95.49    5.50
  -6  -6   4  108.79    5.00
  -6  -6   4  102.89   16.50
  -7   6   4   10.00    9.50
  -7  -6   4   44.00   19.80
  -7  -6   4    7.30   10.40
  -8  -6  -4   43.40    2.40
  -8   6   4   48.10    2.80
   8   6  -4   52.69    8.20
  -8  -6  -4   46.40    2.80
  -8   6   4   48.90    4.60
  -8   6   4   42.90    2.30
  -8   6   4   51.59    6.20
  -8   6   4   32.40   10.40
  -8   6   4   51.79    3.70
  -8  -6   4   47.50    2.90
   8   6   4   43.50    2.00
  -8  -6   4   47.90    2.90
  -8  -6   4   43.40    3.00
  -8   6  -4   37.90    4.10
  -8  -6   4   46.70    2.90
   8   6   4   46.90    6.10
  -9  -6  -4   17.40    1.30
  -9   6   4   18.00    2.20
  -9  -6  -4   17.60    1.60
   9   6  -4   12.40    4.70
  -9   6   4   18.70    1.90
  -9   6   4   19.10    4.30
  -9   6   4   19.00    3.20
  -9   6  -4   13.10    2.40
  -9  -6   4   19.80    1.70
   9   6   4   14.00    4.90
  -9  -6   4   14.00    1.80
  -9  -6   4   17.80    1.80
  -9  -6   4   17.30    1.60
 -10   6   4    0.40    0.70
 -10   6   4   -0.80    0.40
 -10  -6  -4    0.50    0.40
 -10   6   4   -0.20    1.50
 -10  -6  -4   -0.30    0.40
 -10   6   4   -2.10    1.10
 -10  -6   4    0.90    0.60
 -10  -6   4   -0.60    0.50
 -10  -6   4    0.10    0.50
 -10   6  -4    1.40    1.20
 -11   6   4   21.30    3.00
 -11   6   4   23.20    1.90
 -11  -6  -4   25.40    2.10
 -11   6   4   24.30    3.50
 -11  -6   4   22.60    1.50
 -11  -6   4   23.10    1.70
 -11  -6   4   22.50    1.90
 -11   6  -4   23.50    2.40
 -12   6   4   -0.10    1.00
 -12   6   4    0.10    0.90
 -12  -6  -4   -0.20    0.30
 -12  -6   4    0.40    0.40
 -12  -6   4    0.40    0.40
   0   7   4    1.00    1.60
   0  -7  -4   -3.50    6.50
   0   7  -4    3.70    3.40
   0   7   4    0.30    0.70
  -1  -7  -4  129.19   20.40
  -1   7   4  149.49    8.30
  -1   7   4  150.28   14.80
   1   7  -4  148.89   20.80
  -1   7  -4  140.69    7.20
   1  -7  -4  141.79   24.20
   1   7   4  152.08    8.40
  -1   7  -4  131.89   18.40
  -2   7   4  315.47   16.00
  -2   7   4  312.77   24.70
   2   7  -4  305.17   31.30
  -2  -7  -4  308.97   31.10
  -2   7  -4  303.07   20.30
  -2   7  -4  322.47   30.00
   2   7   4  316.07   15.20
  -3   7   4    2.40    3.60
  -3  -7  -4    6.20    7.20
  -3   7   4    6.80    2.80
  -3   7  -4   13.30    4.40
  -3   7  -4   14.50    7.90
  -4   7   4  362.96   22.00
  -4  -7  -4  434.26   37.70
  -4   7   4  392.76   32.50
   4   7  -4  356.06   14.30
   4   7   4  368.26   14.20
  -4   7  -4  394.36   16.50
   4   7   4  397.96   19.10
  -4   7  -4  412.86   28.80
  -4  -7   4  365.26   14.90
  -5   7   4   31.50    2.80
  -5  -7  -4   19.70   11.70
  -5   7   4   31.70    4.80
  -5   7   4   47.70   12.80
   5   7  -4   31.00    1.50
  -5   7   4   27.60    3.30
  -5  -7   4   37.00   12.90
  -5   7  -4   35.10   10.70
  -5  -7   4   31.50    2.10
   5   7   4   33.40    1.50
  -5   7  -4   35.60    3.50
   5   7   4   37.60    4.60
  -6   7   4  192.38   26.00
  -6  -7  -4  199.28    8.40
  -6   7   4  216.58   13.00
  -6   7   4  195.68   10.20
   6   7  -4  198.98   15.20
  -6   7   4  216.48    9.40
   6   7  -4  199.58    7.70
  -6  -7  -4  232.28   28.40
  -6  -7   4  188.38    8.60
   6   7   4  200.28    7.70
  -6  -7   4  194.78    8.40
  -6  -7   4  178.48    8.30
  -6   7  -4  208.78   10.10
   6   7   4  200.58   12.70
  -6  -7   4  195.88   24.90
  -7   7   4   34.00    3.80
  -7   7   4   33.90    5.10
  -7   7   4   27.30    2.70
  -7   7   4   18.20   12.80
   7   7  -4   23.60    5.90
   7   7  -4   27.00    1.50
  -7  -7  -4   13.90   12.30
  -7  -7  -4   26.20    1.90
   7   7   4   25.90    4.70
   7   7   4   28.40    1.40
  -7  -7   4   28.10    2.10
  -7  -7   4   27.00    2.20
  -7  -7   4   25.30    2.40
  -7  -7   4   35.30   12.00
  -7   7  -4   32.00    3.60
  -8   7   4   63.79    5.30
  -8  -7  -4   65.49    3.40
  -8   7   4   63.59    6.70
   8   7  -4   63.59    9.40
  -8   7   4   65.49    4.10
  -8  -7  -4   62.59   18.70
   8   7  -4   59.59    2.70
  -8  -7  -4   60.79    2.90
   8   7   4   53.19    7.50
  -8  -7   4   66.69    3.30
  -8   7  -4   61.09    4.80
  -8  -7   4   63.69    3.50
  -8  -7   4   59.89    3.60
   8   7   4   61.29    2.60
  -9   7   4   50.89    5.80
  -9  -7  -4   43.30    2.30
   9   7  -4   42.90    2.00
  -9   7   4   44.00    4.50
  -9  -7  -4   51.19    2.70
  -9   7   4   51.39    3.30
  -9  -7   4   43.50    2.90
  -9  -7   4   46.10    2.60
  -9  -7   4   48.40    2.90
  -9   7  -4   43.90    4.00
 -10   7   4  212.68   10.60
 -10  -7  -4  212.88    8.70
 -10   7   4  212.88   12.20
 -10   7   4  228.68    9.30
 -10  -7  -4  208.98    8.40
 -10  -7   4  218.68    8.90
 -10  -7   4  195.88    9.00
 -10  -7   4  212.58    8.60
 -10   7  -4  224.48   10.00
 -11  -7  -4    4.10    0.70
 -11   7   4    3.10    0.60
 -11   7   4    2.60    1.60
 -11   7   4    3.30    1.40
 -11  -7   4    6.30    0.90
 -11  -7   4    3.60    0.80
 -11   7  -4    4.50    1.20
 -12  -7  -4    0.90    0.30
 -12   7   4   -0.90    0.80
 -12   7   4    0.90    0.90
 -12  -7   4    1.00    0.30
 -12  -7   4    0.30    0.30
   0   8  -4   73.79    3.20
   0   8   4   74.99   10.70
   0   8  -4   72.89   18.90
   0  -8  -4   98.69   23.40
   0  -8  -4   71.39    3.10
   0   8   4   80.49    5.60
   0   8  -4   78.59    5.70
   0   8   4   84.29    3.40
   1   8  -4   60.89    2.50
  -1   8   4   61.69    5.20
  -1  -8  -4   59.09    2.50
   1   8  -4   60.79    5.70
   1   8  -4   47.50   14.90
  -1  -8  -4   52.39   17.10
  -1   8   4   73.49   10.70
  -1  -8   4   57.89    2.50
   1  -8  -4   57.89    2.50
   1   8   4   57.69    2.50
   1  -8  -4   26.80   22.40
  -1   8  -4   56.69   16.10
   1   8   4   70.09    5.10
   2   8  -4   12.80    0.80
  -2  -8  -4   12.60    0.70
  -2   8   4   14.20    6.10
   2   8  -4   11.90    3.20
  -2   8   4    9.30    2.80
  -2  -8  -4   14.60    9.00
  -2  -8   4   11.70    0.80
  -2   8  -4    8.20    3.70
   2   8   4   13.20    0.80
  -2   8  -4   22.70    9.50
   2  -8  -4   11.10    0.70
   2   8   4   11.50    2.60
  -3   8   4   59.69   11.90
   3   8  -4   52.99    2.30
  -3  -8  -4   57.79   19.30
   3   8  -4   57.39    6.30
  -3  -8  -4   52.29    2.40
  -3   8  -4   45.80   10.70
   3  -8  -4   49.60    2.30
  -3  -8   4   54.09    2.30
   3   8   4   55.29    2.30
   3   8   4   55.99    5.30
  -4   8   4   83.29   18.80
  -4   8   4   69.99    4.90
   4   8  -4   70.39    3.00
   4   8  -4   73.29    7.60
  -4  -8  -4   69.79    3.70
  -4   8   4   72.19    6.90
  -4   8   4   78.99    4.50
  -4  -8  -4   88.69   21.90
   4   8   4   72.99    6.30
  -4   8  -4   70.59    5.00
  -4  -8   4   77.19   22.30
  -4   8  -4   79.89   14.30
   4  -8  -4   65.29    3.00
   4   8   4   70.39    2.90
  -4  -8   4   66.49    2.90
  -4  -8   4   70.29    3.50
   5   8  -4    7.30    0.70
  -5   8   4    3.10    5.90
  -5  -8  -4    2.40   11.40
   5   8  -4    8.20    3.70
  -5   8   4    5.90    2.10
  -5  -8  -4    9.20    1.20
  -5   8   4    5.70    1.50
  -5   8   4   14.50    3.70
   5   8   4    8.30    0.70
  -5   8  -4   21.20    9.80
   5   8   4    9.50    2.60
  -5  -8   4   -8.40    8.30
   5  -8  -4    7.70    0.60
  -5  -8   4    8.40    1.10
  -5   8  -4    7.40    2.00
  -6   8   4   81.09    4.70
  -6   8   4   75.09    5.60
   6   8  -4   73.89    3.20
  -6   8   4   48.20   16.60
   6   8  -4   73.59    8.70
  -6  -8  -4   65.59    4.50
  -6   8   4   76.99    7.50
  -6  -8  -4  105.39   19.30
  -6  -8   4   42.30   15.10
   6  -8  -4   68.19    3.10
   6   8   4   79.19    3.20
  -6  -8   4   79.09    3.90
   6   8   4   71.39    7.10
  -6  -8   4   78.59    4.20
  -6   8  -4   91.39    5.80
  -7   8   4  102.89    5.30
  -7   8   4   97.89    8.30
  -7  -8  -4   91.99    4.50
   7   8  -4   86.49    3.80
  -7   8   4   95.49   20.50
   7   8  -4   84.99   10.00
  -7   8   4   91.59    6.30
  -7  -8   4   88.79    4.50
  -7  -8   4   89.89    4.80
   7   8   4   92.99    3.80
   7   8   4   91.89    8.40
  -7   8  -4   95.79    6.20
  -8  -8  -4   62.09    3.90
  -8  -8  -4   33.40   15.40
  -8   8   4   60.99    6.40
  -8   8   4   66.89    5.30
  -8   8   4   68.29    4.30
  -8  -8   4   57.39    3.50
  -8  -8   4   55.79    2.90
  -8  -8   4   59.99    3.40
  -8   8  -4   64.89    6.00
  -9   8   4   61.99    3.50
  -9   8   4   64.59    6.30
   9   8  -4   58.29    2.50
  -9  -8  -4   57.79    3.00
  -9   8   4   63.59    5.00
  -9  -8   4   59.29    3.20
  -9  -8   4   59.69    2.80
  -9   8  -4   62.59    4.50
  -9  -8   4   54.29    3.40
 -10  -8  -4    5.00    0.90
 -10   8   4    3.10    1.40
 -10   8   4    4.40    1.90
 -10   8   4    3.70    0.90
 -10  -8   4    4.30    0.90
 -10  -8   4    4.90    0.90
 -11  -8  -4    6.30    0.80
 -11   8   4    7.00    1.60
 -11   8   4    3.80    1.60
 -11  -8   4    6.30    0.90
 -11   8  -4    6.10    1.10
 -11  -8   4    7.30    0.70
   0   9  -4    0.20    0.20
   0   9   4    1.80    1.30
   0  -9  -4    0.20    0.20
   0   9   4    0.00    0.20
   0  -9   4    0.10    0.30
   0   9  -4    0.60    1.70
   0   9   4    0.70    2.60
   0  -9  -4   -7.30   17.00
  -1   9   4   23.00    4.00
  -1  -9  -4    1.80   13.80
   1   9  -4   25.80    4.00
   1   9  -4   23.90    1.20
  -1   9   4   12.20    6.30
  -1  -9  -4   23.30    1.20
  -1   9   4   22.50    1.10
   1   9   4   25.00    7.40
   1   9   4   25.10    3.40
  -1   9  -4   22.10    1.20
   1  -9  -4   22.50    1.20
  -1  -9   4   23.30    1.20
   1   9   4   22.90    1.20
   2   9  -4    7.70    0.60
  -2   9   4   22.80    8.70
  -2  -9  -4   -2.90   14.70
   2   9  -4    6.60    2.80
  -2  -9  -4    7.10    0.60
   2   9   4    6.10    0.60
   2   9   4    7.90    2.20
  -2   9  -4    7.80    0.60
   2  -9  -4    7.50    0.60
  -2   9  -4    4.90    4.50
  -2  -9   4   37.20   13.30
  -2  -9   4    8.70    0.70
  -3  -9  -4    2.50   11.60
   3   9  -4    0.90    0.30
   3   9  -4    2.10    2.10
  -3  -9  -4    1.20    0.30
  -3   9   4    1.00    4.10
  -3  -9   4    0.50    0.30
   3  -9  -4    0.70    0.30
  -3  -9   4   -8.00    7.90
  -3   9  -4    3.60    6.40
  -3  -9   4    0.30    0.50
   3   9   4    0.10    0.30
  -4   9   4   29.40   10.30
  -4   9   4   27.10    3.40
  -4  -9  -4   37.20   15.40
   4   9  -4   22.60    4.70
   4   9  -4   27.80    1.40
  -4  -9  -4   26.60    1.20
  -4  -9  -4   24.90    1.80
  -4   9   4   23.50    4.60
   4   9   4   27.60    4.10
  -4   9  -4   29.60   14.90
  -4  -9   4   27.00    1.30
   4   9   4   26.80    1.40
  -4  -9   4   26.80    1.90
  -4   9  -4   27.10    3.30
  -4  -9   4   20.00   13.70
   4  -9  -4   25.80    1.30
  -5   9   4   21.90    4.40
   5   9  -4   13.70    0.90
   5   9  -4   12.60    4.00
  -5   9   4   11.20    2.60
  -5   9   4    0.70    7.80
  -5  -9  -4   11.40   13.00
  -5  -9   4   11.90    1.50
  -5   9  -4    5.10   12.30
  -5  -9   4    9.40    9.40
  -5   9  -4   11.60    2.30
   5   9   4   13.20    3.00
   5   9   4   14.30    0.90
   6  -9   4  185.68    7.30
  -6  -9  -4  193.48    8.00
  -6   9   4  161.78   26.60
  -6   9   4  198.98   10.20
   6   9  -4  191.58    7.40
  -6  -9  -4  156.58   27.60
  -6   9   4  188.08   12.40
   6   9  -4  183.18   14.50
   6   9   4  172.98   12.10
   6  -9  -4  193.48    7.30
   6   9   4  195.98    7.30
  -6  -9   4  190.68    8.10
  -6  -9   4  186.28    8.40
  -6   9  -4  195.58   10.00
  -6  -9   4  194.98   30.00
  -7  -9  -4    5.30    1.00
  -7   9   4    8.60    2.40
   7   9  -4   10.80    4.20
  -7   9   4    6.60    2.80
   7  -9   4    4.90    0.60
  -7   9   4   30.40   13.00
  -7  -9  -4  -16.30   17.70
   7   9  -4    6.00    0.60
   7   9   4    5.80    0.60
   7   9   4   11.40    3.10
  -7  -9   4    6.90    1.30
  -7  -9   4    6.30    1.00
   7  -9  -4    6.30    0.80
  -7   9  -4    5.50    1.80
  -7  -9   4  -13.80   11.60
   8   9  -4    1.10    0.30
  -8   9   4    0.50    1.80
  -8  -9  -4    1.30    0.50
  -8   9   4    2.10    1.60
  -8  -9   4    0.50    0.60
   8   9   4    0.70    0.30
  -8   9  -4    0.60    1.30
  -8  -9   4    0.80    0.50
   9   9  -4    7.90    0.70
  -9  -9  -4    9.30    1.00
  -9   9   4    7.20    2.40
  -9   9   4    7.10    1.80
  -9  -9   4    9.40    1.40
  -9  -9   4   10.90    1.20
  -9   9  -4    9.40    2.00
 -10   9   4   15.70    2.80
 -10  -9  -4   13.30    1.30
 -10   9   4   18.40    2.50
 -10  -9   4   15.50    1.20
 -10  -9   4   15.90    1.40
 -11   9   4    0.20    0.80
 -11   9   4   -0.10    0.90
 -11  -9   4    0.50    0.40
   0  10  -4   61.69    2.70
   0  10   4   74.19   12.50
   0  10   4   62.69    2.60
   0 -10   4   62.09    2.70
   0  10   4   62.59    5.80
   0 -10   4    4.30   25.20
   0 -10  -4   63.39    2.70
   1  10  -4   53.99    6.10
  -1  10   4   64.69    2.70
  -1  10   4   59.29   11.50
  -1 -10  -4   66.39    2.80
  -1 -10  -4   93.29   42.50
   1  10  -4   67.79    2.80
   1 -10   4   66.79    2.80
   1  10   4   73.09    6.90
  -1 -10   4   67.29   23.70
   1  10   4   67.09    2.80
   1 -10  -4   64.79    2.80
  -1  10  -4   66.39    2.80
   1  10   4   57.49   11.10
  -1 -10   4   65.89    2.80
  -1  10  -4   52.99   10.20
  -2  10   4    2.90    4.70
  -2 -10  -4   25.20   18.40
   2  10  -4    2.70    3.00
  -2  10  -4   -3.10    4.40
   2  10   4    8.20    4.90
  -2 -10   4   -6.10   15.50
   3 -10   4  250.27    9.40
  -3  10   4  274.97   29.60
   3  10  -4  252.37    9.40
  -3  10   4  269.97   12.10
   3  10  -4  229.18   15.20
  -3 -10  -4  221.68    9.80
  -3 -10  -4  231.08   35.50
   3 -10  -4  261.97    9.50
  -3 -10   4  224.18    9.80
  -3  10  -4  237.08   25.00
  -3 -10   4  255.37   35.80
   3  10   4  255.07   15.50
   3  10   4  244.38    9.40
  -4 -10  -4    6.70    0.50
   4  10  -4    5.20    0.60
  -4  10   4    1.70    1.50
  -4 -10  -4   43.90   17.70
  -4 -10  -4    5.40    0.90
  -4  10   4    4.20    2.60
  -4  10   4   17.40   10.10
   4 -10   4    5.10    0.60
   4 -10  -4    5.20    0.60
  -4 -10   4    3.90    0.80
  -4  10  -4    7.80   11.10
  -4  10  -4    8.80    2.40
  -4 -10   4    5.50    0.50
  -4 -10   4   25.00   13.40
   4  10   4    2.20    2.50
   4  10   4    5.30    0.60
   5  10  -4   78.49    8.70
  -5 -10  -4   84.19   23.50
   5  10  -4   79.09    3.30
  -5  10   4   76.69    5.80
  -5 -10  -4   75.39    3.80
  -5  10   4   79.89    7.50
   5 -10   4   78.59    3.30
  -5  10   4   56.99   18.40
  -5  10  -4   70.09    5.50
   5  10   4   80.29    3.30
  -5 -10   4  104.39   25.60
  -5 -10   4   80.89    4.20
   5  10   4   67.89    6.90
   5 -10  -4   81.89    3.20
  -5 -10   4   75.39    3.80
  -6 -10  -4  198.38    8.40
  -6  10   4  207.48   10.60
   6 -10   4  205.28    7.80
   6  10  -4  206.18    7.90
  -6  10   4  140.79   28.90
  -6  10   4  198.38   12.60
   6  10  -4  198.48   14.90
  -6 -10   4  162.68   32.90
   6  10   4  214.98    7.90
  -6 -10   4  205.28    8.40
   6  10   4  193.88   13.00
  -6 -10   4  204.48    8.80
   6 -10  -4  204.38    7.80
  -6  10  -4  211.98   10.50
  -7  10   4    2.40    1.80
   7  10  -4    1.70    0.40
  -7 -10  -4    1.80    0.50
  -7 -10  -4  -22.70   22.30
  -7  10   4    0.20    1.90
   7 -10   4    1.20    0.30
  -7 -10   4    1.10    0.80
  -7 -10   4   20.60   24.10
  -7 -10   4    2.10    0.70
  -7  10  -4    1.20    1.50
   7  10   4    1.30    0.40
   8  10  -4   15.10    0.90
  -8 -10  -4   12.20    1.30
   8 -10   4   12.20    0.80
  -8  10   4   15.70    3.30
  -8  10   4    9.70    2.10
  -8 -10   4   15.00    1.30
  -8  10  -4   15.30    2.50
   8  10   4   15.50    0.90
  -8 -10   4   15.60    1.70
  -9  10   4   26.20    3.50
   9  10  -4   31.10    1.40
  -9  10   4   33.10    3.30
  -9 -10  -4   30.50    1.70
  -9 -10   4   31.80    2.10
  -9  10  -4   31.30    2.90
 -10  10   4   56.09    3.70
 -10  10   4   45.10    4.40
 -10  10  -4   53.49    2.90
 -10 -10   4   55.69    2.70
   0  11   4   -4.50    4.60
   0 -11   4    0.10    0.30
   0  11  -4    0.10    0.30
   0 -11  -4    0.10    0.20
   0  11  -4   -4.60    3.30
   0  11   4    0.10    0.20
   0  11   4    7.60    4.80
  -1 -11  -4   52.89   43.30
  -1 -11  -4   48.80    2.10
  -1  11   4   43.60   13.20
   1  11  -4   47.70    2.20
   1 -11   4   47.30    2.20
  -1  11  -4   50.79    2.10
  -1  11  -4   36.50    9.90
   1  11   4   44.10    5.60
   1  11   4   48.70    2.20
   1 -11  -4   48.10    2.20
   1  11   4   37.20   10.80
  -1 -11   4  179.78   60.09
  -1 -11   4   49.80    2.20
  -2  11   4   21.50    8.20
   2  11  -4   36.10    1.70
   2  11  -4   25.80    6.40
  -2 -11  -4   36.20    1.60
  -2 -11  -4   12.30   27.60
   2 -11   4   34.20    1.70
   2  11   4   36.50    1.70
  -2 -11   4   36.50    1.70
   2  11   4   41.40    5.30
  -2 -11   4   21.50   20.00
  -2  11  -4   21.20    9.00
   2 -11  -4   36.60    1.70
  -2  11  -4   34.60    1.60
   2  11   4   22.50    8.60
  -3 -11  -4   24.80    1.70
   3 -11   4   24.90    1.40
   3  11  -4   15.60    4.70
  -3 -11  -4   50.99   19.90
  -3  11   4   23.90   11.50
  -3 -11  -4   26.00    1.20
   3  11  -4   25.30    1.30
  -3  11   4   25.20    3.30
   3 -11  -4   24.60    1.30
  -3 -11   4   24.30    1.20
  -3 -11   4  -26.40   21.30
   3  11   4   16.70    6.80
   3  11   4   26.30    1.30
   4  11  -4  155.88   16.90
   4 -11   4  181.88    6.90
  -4 -11  -4  169.78    7.30
  -4  11   4  179.98    9.60
  -4 -11  -4  180.68    6.70
  -4  11   4  169.18   11.50
  -4 -11  -4  171.68   36.10
   4  11  -4  181.28    6.90
  -4  11  -4  182.58    9.40
   4  11   4  152.08   14.30
  -4  11  -4  116.59   32.90
   4  11   4  180.88    6.80
  -4 -11   4  181.48   38.00
  -4 -11   4  181.08    6.70
   4 -11  -4  180.98    6.80
  -4 -11   4  170.38    7.30
  -5 -11  -4   75.19    4.50
   5  11  -4   77.69    3.30
  -5  11   4   80.99    5.80
   5 -11   4   79.29    3.30
  -5 -11  -4   78.49   27.90
  -5  11   4   75.89    7.30
   5 -11  -4   80.59    3.40
  -5 -11   4   78.29    4.10
  -5 -11   4   54.19   24.80
  -5  11  -4   75.29    5.60
  -5 -11   4   76.09    3.70
   5  11   4   77.29    3.20
   6  11  -4   91.59    3.90
  -6 -11  -4   95.59    4.30
  -6 -11  -4   90.09   38.80
  -6  11   4   90.49    7.60
  -6  11   4   95.69    6.40
   6 -11   4   96.59    3.90
  -6 -11   4   92.59    4.70
   6  11   4  100.29    3.90
  -6 -11   4   96.49    4.30
   6 -11  -4   97.59    3.90
  -6  11  -4  103.59    6.20
  -7  11   4   14.00    3.20
  -7  11   4   13.00    2.40
  -7 -11  -4   16.30    1.30
   7 -11   4   15.10    0.90
   7  11  -4   14.70    0.90
  -7 -11   4   16.20    1.40
  -7 -11   4   13.40    1.50
  -7  11  -4   13.70    2.40
   7 -11  -4   13.70    0.90
   7  11   4   14.50    0.90
   8  11  -4    0.80    0.20
  -8  11   4    0.20    1.30
  -8  11   4   -0.20    1.10
  -8  11  -4    0.70    1.10
  -8 -11   4   -0.20    0.50
   9  11  -4    7.00    0.60
  -9  11   4    5.40    1.50
  -9 -11   4    6.80    1.00
  -9  11  -4    8.10    1.70
 -10  11   4   12.00    1.70
 -10 -11   4   10.70    0.90
   0  12  -4   -4.10    7.10
   0  12   4   17.40   12.60
   0 -12   4    6.00    0.70
   0  12  -4    5.90    0.60
   0  12   4    5.70    0.60
   0 -12  -4    5.90    0.60
   1 -12   4    0.80    0.30
  -1 -12  -4    0.70    0.30
   1  12  -4    0.60    0.30
  -1  12   4   -3.10    9.00
   1  12   4    1.60    9.50
  -1 -12   4    0.90    0.30
   1 -12  -4    0.70    0.30
   1  12   4    0.70    0.30
  -1  12  -4  -11.60   13.50
   2  12  -4   98.29    3.90
  -2  12   4   97.39   23.70
  -2 -12  -4  103.09    3.80
   2 -12   4   93.59    3.90
  -2 -12  -4   86.99   40.90
   2  12   4   93.69    3.80
  -2 -12   4   97.59   38.60
   2  12   4   87.69    9.40
  -2  12  -4   81.19    3.70
   2  12   4   92.89   17.60
  -2 -12   4   95.99    3.80
   2 -12  -4   97.69    3.80
  -3  12   4   54.39    6.10
  -3 -12  -4   52.79    2.90
  -3  12   4   58.29    4.70
   3 -12   4   60.39    2.60
   3  12  -4   57.19    2.50
  -3 -12  -4   36.00   34.00
  -3 -12  -4   59.69    2.50
  -3 -12   4   16.10   29.30
  -3  12  -4   64.69    4.90
   3  12   4   61.29    2.50
   3 -12  -4   59.49    2.50
   4 -12   4   87.39    3.60
  -4 -12  -4  126.69   38.40
   4  12  -4   84.69    3.60
  -4  12   4   92.39    6.10
  -4 -12  -4   86.19    3.30
  -4  12   4   73.09    7.00
  -4 -12  -4   84.59    3.90
   4  12   4   89.49    3.50
  -4 -12   4   54.89   31.70
  -4  12  -4   89.69    5.90
   4 -12  -4   86.69    3.50
  -5  12   4    3.10    1.60
   5  12  -4    2.70    0.40
  -5 -12  -4    3.10    0.70
  -5  12   4    1.80    2.00
   5 -12   4    3.20    0.50
   5 -12  -4    2.70    0.40
  -5  12  -4    4.80    1.80
   5  12   4    2.80    0.40
  -5 -12   4    3.60    0.90
  -6 -12  -4  126.69    5.10
   6  12  -4  123.59    4.90
  -6  12   4  109.09    8.00
   6 -12   4  124.89    4.80
  -6  12   4  124.29    7.10
   6 -12  -4  122.49    4.80
   6  12   4  123.39    4.80
  -6 -12   4  122.39    5.60
  -6  12  -4  125.69    6.90
   7 -12   4   13.10    0.70
   7  12  -4   12.50    0.80
  -7  12   4   11.20    2.60
  -7  12   4    9.70    1.90
  -7 -12   4   13.10    1.30
  -7  12  -4   11.60    2.00
   7 -12  -4   13.20    0.70
   8 -12   4   47.60    1.90
  -8  12   4   44.60    3.70
  -8  12   4   49.30    3.70
   8  12  -4   50.79    2.10
  -8 -12   4   50.19    2.60
  -8  12  -4   52.99    3.30
  -9  12   4    7.40    1.70
   9  12  -4    7.80    0.40
  -9 -12   4    8.10    1.00
   0 -13   4    0.20    0.30
   0 -13  -4    0.30    0.30
   0  13  -4    0.10    0.20
  -1 -13  -4  105.19    4.10
   1 -13   4  106.49    4.20
   1  13  -4  104.89    4.20
  -1 -13   4  103.49    4.20
  -1  13  -4  101.19    4.00
   1 -13  -4  101.49    4.10
  -2 -13  -4    7.70    0.60
  -2  13   4    3.40    2.50
  -2  13   4    8.60    2.00
   2  13  -4    8.10    0.70
   2 -13   4    8.30    0.70
   2 -13  -4    6.80    0.60
   2  13   4    8.00    0.60
  -2 -13   4    7.30    0.60
   3 -13   4   29.60    1.50
  -3 -13  -4   29.00    1.30
  -3  13   4   29.40    3.40
   3  13  -4   29.10    1.40
  -3  13   4   27.30    4.30
  -3  13  -4   27.10    3.30
   3  13   4   29.00    1.40
  -3 -13   4   29.10    1.30
   3 -13  -4   27.80    1.40
  -4  13   4   35.30    3.80
  -4  13   4   34.20    4.60
   4 -13   4   40.80    1.90
   4  13  -4   45.00    1.90
  -4  13  -4   40.00    3.80
  -4 -13   4   37.30    2.40
   4 -13  -4   39.80    1.80
   4  13   4   40.90    1.80
   5  13  -4   16.40    0.90
  -5  13   4   19.00    2.80
  -5  13   4   12.60    2.80
   5 -13   4   15.90    0.90
  -5 -13   4   14.30    1.40
   5 -13  -4   16.60    0.90
   5  13   4   15.70    0.90
  -5  13  -4   14.70    2.30
  -6  13   4   -0.70    1.20
   6 -13   4    0.10    0.20
  -6  13   4   -2.10    1.40
  -6  13  -4    2.00    1.10
  -6 -13   4   -1.10    0.60
   6 -13  -4    0.40    0.20
   7 -13   4    1.70    0.40
  -7  13   4    0.00    1.10
  -7  13   4    0.90    1.10
   7  13  -4    1.80    0.30
   7 -13  -4    1.20    0.20
  -7  13  -4    2.10    1.00
  -7 -13   4    0.80    0.50
  -8  13   4    2.90    1.70
  -8  13  -4   -1.20    1.10
  -8 -13   4    1.50    0.60
   0 -14  -4   14.00    0.80
   0 -14   4   13.40    0.80
   0  14  -4   13.20    0.70
   1  14  -4    7.60    0.60
  -1  14   4    8.80    2.00
  -1 -14  -4    7.60    0.60
   1 -14   4    6.90    0.60
  -1 -14   4    6.50    0.60
   1 -14  -4    7.00    0.60
  -2  14   4    1.40    1.40
   2 -14   4    0.50    0.30
  -2  14   4   -0.10    1.50
  -2 -14  -4    0.10    0.20
   2  14  -4    0.20    0.20
   2 -14  -4    0.30    0.20
  -2  14  -4   -0.20    1.20
  -2 -14   4    0.10    0.20
   3 -14   4    0.10    0.20
  -3 -14  -4    0.10    0.20
   3  14  -4    0.10    0.20
  -3  14   4    0.40    1.20
  -3 -14   4    1.30    0.60
  -3  14  -4   -0.40    1.20
   3 -14  -4    0.40    0.20
   4  14  -4   27.40    1.30
   4 -14   4   31.80    1.50
  -4  14   4   28.90    3.40
  -4 -14   4   23.40    2.20
  -4  14  -4   31.80    3.50
   5  14  -4   30.60    1.40
  -5  14   4   33.00    3.00
   5 -14   4   30.00    1.40
  -5  14  -4   26.10    2.70
  -5 -14   4   30.60    1.90
   5 -14  -4   31.50    1.30
  -6  14   4    2.50    1.30
   6 -14   4    4.40    0.40
   6  14  -4    4.30    0.40
  -6  14   4    5.20    1.50
  -6  14  -4    3.60    1.20
  -6 -14   4    4.00    0.70
   6 -14  -4    4.30    0.50
  -7  14   4   19.40    2.10
   0 -15   4    0.30    0.20
   0  15   4   -0.50    1.20
   0 -15  -4    0.20    0.20
   0  15   4    0.10    1.00
   1  15  -4    0.40    0.20
  -1  15   4    0.00    1.10
   1 -15   4    0.20    0.20
  -1  15   4    1.00    1.40
  -1 -15  -4    0.20    0.20
   1  15   4    1.00    1.00
   1 -15  -4    0.60    0.20
  -1 -15   4    0.00    0.20
  -1  15  -4    0.50    1.10
   2 -15   4   19.40    1.00
  -2  15   4   20.30    2.50
   2  15  -4   18.90    0.90
  -2 -15  -4   20.80    1.00
  -2  15  -4   19.50    2.50
  -2 -15   4   18.60    1.30
   2 -15  -4   20.20    1.00
  -3  15   4    9.40    1.70
   3  15  -4   10.10    0.60
   3 -15   4   10.30    0.60
  -3  15  -4   11.20    1.70
   3 -15  -4   10.20    0.60
  -3 -15   4   10.00    1.00
   4 -15   4   16.70    0.90
  -4  15   4   15.60    2.60
   4  15  -4   14.30    0.80
  -4  15  -4   15.40    1.90
  -4 -15   4   13.30    1.10
   5  15  -4    0.00    0.10
  -5  15   4   -1.10    0.80
   5 -15   4    0.10    0.20
  -5  15  -4    0.30    0.70
  -5 -15   4    0.50    0.30
   5 -15  -4   -0.10    0.10
   0  16  -4   49.00    3.00
   0 -16   4   47.90    1.90
   0  16   4   45.60    3.40
   1 -16   4    2.60    0.30
  -1  16   4    1.90    1.20
   1  16  -4    2.20    0.90
  -1 -16  -4    2.40    0.20
   1  16   4    0.20    1.00
   1 -16  -4    2.20    0.30
  -1 -16   4    2.00    0.40
  -1  16  -4    1.80    1.00
   1  16   4    3.10    0.80
   2 -16   4   26.60    1.10
  -2  16   4   24.50    2.00
  -2 -16   4   22.80    1.30
   2  16   4   22.00    1.80
  -2  16  -4   21.90    1.90
   2 -16  -4   25.90    1.00
   0   0   5    0.10    1.20
   0   0  -5    0.60    4.10
   0   0   5   -0.60    0.70
  -1   0  -5    0.10    2.40
   1   0   5    0.90    0.60
   1   0  -5    3.80    4.00
  -1   0   5   -0.10    1.10
  -1   0   5   -1.30    0.90
  -2   0  -5   -3.50    2.60
  -2   0   5   -0.70    4.50
   2   0   5    0.50    0.50
  -3   0   5   -0.30    4.10
  -3   0  -5    1.80    3.30
  -3   0   5    0.10    1.90
   3   0   5    0.50    0.50
  -4   0   5    0.90    2.00
   4   0   5    1.20    0.60
   4   0   5    2.80    1.40
  -4   0   5    2.80    4.10
  -4   0  -5    2.30    3.30
  -5   0   5   -1.90    2.10
   5   0   5   -0.60    0.50
  -5   0  -5   -1.30    2.90
  -5   0   5   -1.90    2.50
  -6   0   5   -3.70    2.20
   6   0   5    1.70    0.90
  -6   0  -5   -1.80    2.50
  -7   0   5   -0.50    0.50
  -7   0   5   -0.30    0.70
  -7   0   5   -3.40    2.90
  -7   0  -5    0.40    0.50
  -7   0  -5    0.10    0.30
  -7   0   5   -1.00    0.50
  -7   0  -5    0.00    0.50
  -7   0  -5   -0.10    0.40
  -7   0   5    0.50    1.10
  -7   0   5    0.20    0.60
  -7   0   5   -1.50    0.90
   7   0   5    1.60    1.20
  -7   0  -5    0.00    0.80
  -8   0  -5    0.20    0.40
  -8   0   5   -0.70    1.30
  -8   0  -5    0.70    0.90
  -8   0  -5    1.70    1.10
  -8   0  -5   -0.20    0.40
   8   0   5    5.00    2.10
  -8   0  -5   -0.10    0.40
  -8   0   5   -0.70    0.50
  -8   0   5    1.40    1.70
  -8   0   5   -5.60    3.40
  -8   0   5    0.80    0.60
  -8   0   5    0.50    0.70
  -8   0   5   -0.70    0.70
  -9   0  -5    0.70    0.60
  -9   0   5    0.50    1.70
  -9   0   5    1.20    1.60
  -9   0   5    0.20    0.60
  -9   0   5    0.10    0.50
  -9   0   5    0.20    0.70
  -9   0  -5    0.40    0.60
  -9   0   5   -0.30    0.80
 -10   0   5    0.20    0.60
 -10   0   5   -0.50    0.80
 -10   0  -5   -0.20    0.50
 -10   0   5   -0.10    1.60
 -10   0   5    0.00    0.50
 -10   0  -5    0.40    0.60
 -10   0   5    0.80    1.70
 -10   0   5   -1.10    0.60
 -11   0   5    0.90    1.50
 -11   0   5   -0.20    0.70
 -11   0   5    0.60    0.60
 -11   0   5   -0.80    0.40
 -11   0   5   -0.10    1.30
 -11   0   5    0.20    0.70
 -12   0   5    0.20    0.60
 -12   0  -5   -0.10    0.40
 -12   0   5    0.50    1.20
 -12   0   5    0.00    0.60
 -12   0   5    0.00    0.40
 -12   0   5    0.40    0.70
 -13   0   5   -0.20    0.30
 -13   0   5   -0.10    0.40
   0   1   5   -1.70    1.00
   0  -1  -5   -2.60    2.40
   0   1   5    0.20    0.60
   0  -1   5   -0.10    0.80
   0  -1   5    1.30    0.90
   0   1  -5   -1.60    3.10
   1   1  -5   31.90    7.60
  -1   1   5   19.90    4.00
   1  -1   5   24.00    2.50
  -1  -1  -5   22.50    6.70
  -1   1   5   24.60    3.00
  -1  -1   5   26.30    3.50
   1   1   5   23.20    2.90
  -1   1  -5   22.50    2.30
  -1   1  -5   23.00    6.70
   1   1   5   24.90    2.10
   1  -1  -5   22.80    6.40
   2  -1   5  240.28   10.50
   2   1  -5  242.28   19.40
  -2   1   5  256.07   22.00
  -2   1   5  251.17   16.50
  -2  -1  -5  243.88   19.50
  -2   1   5  223.98   12.90
   2   1   5  231.98   10.50
  -2  -1   5  240.18   14.20
  -2   1  -5  232.08   18.30
   2   1   5  225.68   10.40
   2   1   5  242.88   10.40
  -3  -1  -5   -2.50    3.00
  -3   1   5    2.30    4.10
  -3   1   5   -0.60    1.50
   3  -1   5    1.40    0.60
  -3   1  -5    9.30    4.00
   3   1   5    1.90    0.80
  -3  -1   5    0.30    1.50
  -3  -1   5   -2.70    4.40
  -4  -1  -5  146.89   15.70
  -4   1   5  160.48   13.40
  -4   1   5  154.98   14.60
   4  -1   5  143.89    7.00
  -4  -1   5  163.78   15.10
  -4   1  -5  159.48   14.70
  -4  -1   5  155.78   12.80
   4   1   5  146.59    7.70
  -5   1   5  585.44   34.40
  -5  -1  -5  570.94   34.50
   5  -1   5  544.25   22.70
  -5   1  -5  590.94   32.20
   5   1   5  583.24   24.00
  -5  -1   5  566.44   31.60
  -6  -1  -5    3.20    3.50
  -6  -1  -5   -1.50    4.10
  -6  -1   5    3.60    4.30
   6   1   5    4.80    1.40
  -6   1  -5    4.90    2.80
  -7   1   5   -0.40    0.70
  -7   1   5    0.50    3.50
  -7   1   5    0.10    0.50
  -7   1   5    0.00    1.10
  -7   1   5    0.00    1.30
  -7   1   5   -0.70    0.50
  -7  -1  -5    0.40    0.40
  -7   1   5    1.40    0.80
  -7  -1  -5    0.90    0.60
  -7  -1  -5    0.90    0.40
  -7  -1   5    0.90    0.70
  -7  -1   5   -1.50    2.90
  -7  -1   5   -0.60    0.60
  -7  -1   5    0.20    1.20
  -7   1  -5    0.00    0.30
  -7   1  -5   -0.70    0.30
   7   1   5    0.20    1.00
  -7  -1   5    0.90    1.10
  -7   1  -5   -0.50    0.90
  -7   1  -5    0.70    0.40
  -8   1   5    2.60    0.70
  -8   1   5    1.10    1.50
  -8   1   5    9.60    5.40
  -8   1   5    3.40    0.80
  -8   1   5    3.10    0.90
  -8  -1  -5    1.70    0.60
  -8   1   5    5.00    2.20
  -8  -1  -5    3.20    0.70
  -8  -1  -5    2.80    1.10
  -8  -1  -5    2.90    0.70
  -8   1   5    2.60    1.10
  -8  -1   5    4.00    0.90
  -8  -1   5    3.90    1.00
  -8  -1   5    1.70    1.60
   8   1   5    6.70    2.00
  -8  -1   5    1.60    1.00
  -8   1  -5    6.20    1.60
  -8   1  -5    2.30    1.30
  -8   1  -5    3.00    0.70
  -8   1  -5    4.00    0.80
  -8   1  -5    3.00    0.70
  -8  -1   5    3.70    2.00
  -8   1  -5    2.40    0.80
  -8  -1   5    3.30    1.00
  -9   1   5  166.88    7.10
  -9   1   5  167.08   10.60
  -9   1   5  170.78    8.40
  -9   1   5  160.28    7.60
  -9   1   5  164.48    8.80
  -9   1   5  162.38    7.20
  -9  -1  -5  164.08    7.00
  -9   1   5  121.99   17.30
  -9  -1  -5  159.58    6.90
  -9  -1   5  159.78    7.30
  -9  -1   5  156.78    8.10
  -9  -1   5  172.98   10.20
  -9   1  -5  165.98    7.00
  -9  -1   5  162.78    7.20
  -9   1  -5  165.18    6.90
  -9  -1   5  155.98    7.60
  -9   1  -5  181.08    8.80
  -9   1  -5  150.98    7.80
  -9  -1   5  164.38    8.50
 -10   1   5   90.99    4.60
  10   1  -5   84.69   16.60
 -10   1   5   93.29    6.10
 -10   1   5   95.99    5.00
 -10   1   5   97.59    5.60
 -10   1   5   91.09    7.40
 -10  -1  -5   94.19    4.30
 -10   1   5   96.59    4.50
 -10  -1  -5   94.39    4.40
 -10  -1   5  100.89    7.10
 -10   1  -5   91.69    4.30
 -10  -1   5   86.09    5.60
 -10   1  -5   87.69    4.90
 -10  -1   5   90.99    5.40
 -10   1  -5   92.29    4.30
 -10  -1   5   96.49    5.10
 -10  -1   5   95.59    4.60
 -11  -1  -5   55.19    2.90
 -11   1   5   51.29    4.20
 -11   1   5   55.99    3.40
 -11   1   5   57.99    3.90
 -11   1   5   60.59    3.10
 -11   1   5   57.89    2.90
 -11   1   5   57.49    5.30
 -11  -1   5   54.59    4.80
 -11  -1   5   57.89    3.70
 -11  -1   5   58.79    3.30
 -11  -1   5   59.39    3.10
 -11   1  -5   54.89    2.80
 -11  -1   5   53.59    3.40
 -12   1   5   47.40    2.30
 -12   1   5   48.80    3.10
 -12   1   5   45.70    3.40
 -12   1   5   40.20    3.80
 -12  -1  -5   45.10    2.30
 -12   1   5   46.00    2.70
 -12   1   5   47.60    3.00
 -12  -1   5   46.20    2.70
 -12  -1   5   48.20    2.90
 -12  -1   5   45.30    2.50
 -13   1   5   42.50    2.10
 -13   1   5   44.00    2.10
 -13   1   5   42.60    2.40
 -13  -1   5   44.80    2.10
 -13  -1   5   40.80    2.20
 -13  -1   5   40.90    2.10
   0   2   5  184.78   11.70
   0   2   5  191.28    8.80
   0  -2  -5  188.38   16.90
   0   2  -5  183.68   16.20
   1  -2   5  166.98    9.30
  -1   2   5  185.28    9.50
   1   2  -5  174.78   16.30
  -1   2   5  184.18   12.90
  -1  -2  -5  171.68   16.10
   1   2   5  180.48    8.20
   1   2   5  180.48   10.20
   1  -2  -5  187.08   16.90
  -1   2  -5  185.38   16.20
   2   2  -5   30.80    7.80
  -2   2   5   33.50    5.90
   2  -2   5   27.40    2.70
  -2  -2  -5   24.60    7.60
  -2   2   5   27.60    3.70
  -2   2   5   20.50    7.00
  -2   2  -5   32.90    6.20
  -2  -2   5   28.60    3.90
  -3   2   5  124.89   13.50
  -3  -2  -5  128.29   14.50
  -3   2   5  122.69   12.60
   3  -2   5  133.79    6.60
  -3   2  -5  117.89   13.00
   3   2   5  129.09    6.90
  -3  -2   5  130.59   10.10
  -3  -2   5  132.09   15.60
  -4   2   5  225.38   19.10
  -4  -2  -5  245.58   21.10
   4  -2   5  210.38   10.00
  -4   2   5  239.68   18.30
  -4  -2   5  241.08   15.80
  -4   2  -5  221.58   18.30
   4   2   5  234.88   11.20
  -4  -2   5  209.28   21.00
  -4   2  -5  244.38   10.50
  -5   2   5    6.80    4.20
  -5  -2  -5   13.50    6.20
   5  -2   5    7.60    1.50
  -5  -2   5   12.50    8.00
   5   2   5    9.80    2.20
  -5  -2   5   11.70    4.10
  -5   2  -5    9.00    4.50
  -6  -2  -5   13.40    6.40
  -6   2   5    2.20    4.60
   6  -2   5    5.70    1.30
  -6   2   5    7.90    3.00
  -6   2  -5    9.80    1.20
  -6  -2   5   12.50    4.60
  -6  -2   5    2.50    3.40
   6   2   5    8.40    2.00
  -6  -2   5    8.10    3.80
  -7   2   5   62.69    4.10
  -7  -2  -5   59.09    3.00
  -7  -2  -5   59.59    3.20
  -7   2   5   65.19   10.90
  -7  -2  -5   58.89    5.40
  -7   2   5   61.79    3.20
  -7   2   5   56.29    4.30
  -7  -2  -5   47.90    7.60
  -7   2   5   59.09    3.60
  -7  -2  -5   60.59    3.10
  -7   2   5   65.29    5.90
  -7   2   5   62.29    3.80
  -7  -2   5   67.69    5.30
  -7  -2   5   61.49    3.30
  -7  -2   5   62.49    3.90
  -7   2  -5   67.19    4.00
  -7   2  -5   63.69    3.10
   7   2   5   62.49    5.50
  -7  -2   5   65.69    4.10
  -7   2  -5   72.89    6.10
  -7   2  -5   51.99    5.70
  -7  -2   5   61.69    3.60
  -7  -2   5   63.29    3.40
  -7   2  -5   66.19    3.10
  -7   2  -5   63.59    3.10
  -8   2   5   21.90    2.60
  -8   2   5   13.60    6.50
  -8   2   5   22.50    1.70
  -8  -2  -5   20.20    1.70
  -8   2   5   19.40    3.00
  -8   2   5   22.60    4.00
  -8   2   5   21.90    1.70
  -8  -2  -5   21.10    1.60
  -8   2   5   20.50    2.00
  -8  -2  -5   20.90    1.70
  -8  -2   5   20.00    1.80
  -8   2  -5   19.50    1.50
  -8  -2   5   22.00    3.40
  -8  -2   5   20.30    1.90
  -8   2  -5   19.50    2.60
  -8   2  -5   20.60    1.60
   8   2   5   18.10    3.70
  -8   2  -5   19.10    2.60
  -8  -2   5   21.00    2.30
  -8  -2   5   21.30    2.10
  -8   2  -5   20.50    1.80
  -8  -2   5   23.20    2.90
  -9   2   5   10.90    1.70
  -9  -2  -5    7.40    1.10
  -9   2   5    5.90    2.50
  -9   2   5    5.20    1.00
  -9  -2  -5    7.90    1.20
  -9   2   5    7.00    1.70
  -9   2   5    8.60    2.20
  -9   2   5   -0.40    6.60
  -9   2   5    8.60    1.20
  -9  -2   5    6.70    1.20
  -9  -2   5    4.80    1.20
  -9   2  -5    6.00    1.70
  -9   2  -5    9.50    1.20
  -9   2  -5    8.00    1.70
  -9  -2   5    6.60    1.10
  -9  -2   5    8.20    2.20
  -9   2  -5    8.10    1.10
  -9  -2   5    8.90    1.70
   9   2   5    7.80    3.50
  -9  -2   5    9.50    2.70
 -10   2   5  252.17   13.90
 -10   2   5  250.17   11.30
 -10  -2  -5  245.88   10.00
 -10   2   5  238.88   11.70
 -10   2   5  250.37   10.10
 -10   2   5  253.57    9.90
 -10   2   5  243.58   10.50
 -10  -2  -5  245.48    9.90
 -10  -2   5  234.18   10.30
 -10  -2   5  238.38   10.60
 -10   2  -5  250.67   12.20
 -10  -2   5  244.68   10.20
 -10  -2   5  244.48   12.60
 -10  -2   5  244.28   11.00
 -10   2  -5  241.18    9.80
 -11   2   5   25.30    3.30
 -11   2   5   23.80    1.50
 -11   2   5   22.00    1.70
 -11  -2  -5   21.30    1.50
 -11  -2  -5   21.60    1.60
 -11   2   5   20.00    3.60
 -11   2   5   22.60    2.00
 -11   2   5   22.80    2.40
 -11  -2   5   18.60    1.80
 -11  -2   5   20.90    2.10
 -11  -2   5   20.50    2.00
 -11   2  -5   20.50    1.50
 -11  -2   5   20.70    1.80
 -11  -2   5   19.90    2.90
 -12   2   5  172.48    7.80
 -12   2   5  157.18    8.90
 -12   2   5  181.28    7.00
 -12   2   5  172.68    8.00
 -12  -2   5  176.48    7.40
 -12  -2   5  179.08    7.40
 -12  -2   5  169.68    7.20
 -12  -2   5  175.28    7.60
 -13   2   5   17.50    1.20
 -13   2   5   15.50    1.20
 -13  -2   5   15.80    1.20
 -13  -2   5   17.30    1.10
 -13  -2   5   14.90    1.10
   0   3   5   -0.60    1.10
   0   3  -5   -1.30    2.80
   0  -3  -5   -2.60    3.80
   0   3   5   -0.30    0.40
  -1   3   5  268.07   12.60
   1   3  -5  264.07   21.50
  -1  -3  -5  271.67   22.40
  -1   3   5  268.87   17.20
   1   3   5  262.17   14.10
   1   3   5  282.27   11.80
   1  -3  -5  234.48   21.10
  -1   3  -5  264.77   20.80
  -2   3   5  271.67   22.70
  -2  -3  -5  269.47   22.50
  -2   3   5  261.67   14.20
  -2   3   5  268.17   18.90
   2   3  -5  244.08   21.80
  -2   3  -5  279.37   21.20
  -2   3  -5  284.27   13.40
   2  -3  -5  257.67   23.10
   2   3   5  278.57   12.20
  -3   3   5  108.69   12.40
  -3   3   5   71.69   12.90
  -3   3   5   89.59    7.80
  -3  -3  -5  105.29   13.30
  -3   3  -5  120.09   16.20
   3   3   5  105.89    6.20
  -3   3  -5  106.49    7.70
  -4  -3  -5   53.49   10.90
  -4   3   5   56.19   12.20
  -4   3  -5   53.09    8.50
  -4  -3   5   39.40   13.20
  -4   3  -5   47.80    5.30
   4   3   5   47.80    4.10
  -5  -3  -5   11.50    6.50
  -5  -3  -5   13.10   10.20
  -5   3   5    5.70    4.10
  -5   3  -5    0.70    2.40
  -5  -3   5   -6.40    7.40
   5   3   5    5.30    1.70
  -5   3  -5    6.30    4.00
  -6   3   5   52.79    5.10
  -6   3   5   55.99    3.90
  -6   3   5   64.19   14.50
  -6   3   5   55.59    3.70
  -6  -3  -5   44.70   12.20
  -6  -3  -5   50.49    2.60
  -6  -3  -5   38.80   11.30
  -6  -3   5   48.90    3.00
  -6  -3   5   51.49    2.80
   6   3   5   58.39    5.50
  -6  -3   5   33.70   10.60
  -6  -3   5   48.60    2.80
  -6  -3   5   50.59    9.10
  -6   3  -5   49.50    2.50
  -6   3  -5   53.69    2.50
  -6  -3   5   49.90    3.30
  -6   3  -5   55.09    7.10
  -7   3   5   83.49    4.40
  -7   3   5   86.69    5.10
  -7  -3  -5   59.79   10.80
  -7   3   5   73.39    5.20
  -7   3   5   79.89    4.70
  -7  -3  -5   82.59    3.90
  -7  -3  -5   81.19    3.80
  -7   3   5   94.29   14.30
  -7   3   5   83.09    4.00
  -7   3   5   89.09    7.10
  -7  -3  -5   86.69   11.40
  -7  -3  -5   81.99    4.00
  -7   3  -5   85.39    4.80
  -7   3  -5   78.69    5.00
  -7   3  -5   82.09    3.70
  -7  -3   5   81.39    4.20
  -7   3  -5   88.39    3.80
  -7  -3   5   83.39    4.70
  -7  -3   5   80.89    4.40
  -7  -3   5   83.79    4.20
   7   3   5   89.19    7.00
  -7  -3   5   82.29    4.80
  -7  -3   5   86.19    6.00
  -7   3  -5   85.89    5.90
  -8   3   5   28.60    4.00
  -8  -3  -5   31.60    2.20
  -8  -3  -5   32.40    2.00
  -8   3   5   21.00    8.90
  -8   3   5   28.80    2.40
  -8   3   5   35.50    2.10
  -8   3   5   33.50    2.20
  -8  -3  -5   33.40    2.10
  -8   3  -5   35.20    2.70
  -8  -3   5   35.30    4.00
  -8  -3   5   33.60    2.90
  -8   3  -5   35.40    3.60
   8   3   5   30.60    4.40
  -8   3  -5   36.80    3.30
  -8  -3   5   35.20    2.80
  -8  -3   5   34.90    2.50
  -9   3   5    9.10    1.20
  -9  -3  -5    8.00    1.10
  -9   3   5   -5.20    6.70
  -9  -3  -5    6.20    1.00
  -9   3   5    9.80    1.90
  -9   3   5    8.00    1.40
  -9   3   5    6.10    2.00
  -9   3   5    9.70    1.20
  -9   3   5    7.00    2.60
  -9   3  -5    9.00    1.90
   9   3   5    6.60    3.20
  -9  -3   5    6.00    1.00
  -9  -3   5    8.30    2.30
  -9  -3   5    5.70    1.20
  -9   3  -5    7.70    1.80
  -9  -3   5    7.00    1.20
  -9  -3   5    6.90    1.40
  -9   3  -5    7.30    1.10
 -10   3   5   79.59    5.00
 -10  -3  -5   79.19    4.60
 -10   3   5   73.29    5.90
 -10   3   5   97.59    6.00
 -10  -3  -5   82.29    4.50
 -10   3   5   82.19    4.40
 -10   3   5   76.59    7.00
 -10  -3   5   73.49    4.30
 -10  -3   5   74.79    5.70
 -10   3  -5   73.89    4.80
 -10  -3   5   79.29    4.40
 -10  -3   5   78.39    4.20
 -10  -3   5   79.09    4.90
 -10   3  -5   79.69    3.70
 -11   3   5  118.79    6.10
 -11   3   5  107.49    7.80
 -11   3   5  121.69    5.10
 -11   3   5  127.49    6.90
 -11  -3  -5  113.49    4.90
 -11  -3  -5  116.69    5.10
 -11   3   5  121.39    4.90
 -11   3   5  119.89    5.50
 -11  -3   5  111.79    5.40
 -11  -3   5  119.29    5.40
 -11  -3   5  117.19    5.70
 -11   3  -5  112.59    5.70
 -11  -3   5  113.89    5.50
 -12   3   5   13.30    1.60
 -12   3   5   10.60    2.70
 -12   3   5   13.40    1.00
 -12  -3  -5   14.90    1.10
 -12   3   5   14.10    1.30
 -12   3   5   13.20    3.50
 -12  -3   5   15.80    1.30
 -12  -3   5    9.60    1.80
 -12  -3   5   14.90    1.40
 -13   3   5    5.40    0.80
 -13  -3   5    5.90    0.70
 -13  -3   5    6.50    0.60
   0   4   5  232.98   11.00
   0   4  -5  244.58   21.60
   0   4   5  246.38   15.30
   0  -4  -5  266.57   23.80
  -1   4   5   35.50    3.20
  -1  -4  -5   28.40    9.50
  -1   4  -5   29.50    8.00
   1  -4  -5   29.80   10.30
   1   4   5   34.10    2.80
  -2   4   5   49.99    5.00
  -2   4   5   51.79    8.10
  -2  -4  -5   36.30   10.10
   2   4  -5   65.39   12.50
   2   4   5   54.49    4.10
  -2   4  -5   52.59    9.40
  -2   4  -5   56.99    5.40
  -3   4   5   72.69    7.00
   3   4  -5   88.89   16.80
  -3   4   5   87.29   11.70
  -3  -4  -5   83.59   13.40
  -3   4  -5   78.79    7.80
  -3   4  -5   75.19   11.70
   3   4   5   86.99    5.70
  -4   4   5  357.76   28.00
  -4  -4  -5  387.86   30.70
   4   4   5  369.96   17.50
  -4  -4   5  399.46   34.40
  -4   4  -5  368.56   21.10
  -4   4  -5  383.96   27.10
  -5  -4  -5   46.80   20.60
  -5   4   5   73.09   17.30
  -5  -4  -5   64.59   12.60
  -5   4  -5   61.29    7.50
  -5  -4   5   80.69   20.00
   5   4   5   66.69    5.60
  -5   4  -5   75.99   10.80
  -6  -4  -5    3.60    1.10
  -6   4   5    5.30    1.40
  -6   4   5    2.80    1.30
  -6   4   5    3.80    3.60
  -6  -4  -5   10.60   12.50
  -6   4   5    4.10    1.90
  -6  -4  -5   25.20   12.90
  -6  -4   5    4.20   11.30
  -6  -4   5   -1.20    4.50
   6   4   5    2.30    1.50
  -6   4  -5    5.00    0.90
  -6   4  -5    3.40    5.10
  -6  -4   5    2.90    0.90
  -6  -4   5    3.70    1.30
  -6  -4   5    3.80    0.90
  -6  -4   5    4.90    0.90
  -7   4   5  310.87   15.90
  -7  -4  -5  255.37   23.80
  -7  -4  -5  285.37   11.40
  -7   4   5  286.27   11.80
  -7  -4  -5  268.37   11.10
  -7   4   5  292.87   28.30
  -7   4   5  279.17   13.10
  -7  -4  -5  286.97   25.30
  -7   4   5  281.27   11.20
  -7   4   5  283.07   11.00
  -7   4   5  302.47   12.70
  -7  -4   5  271.47   11.50
   7   4   5  294.17   15.80
  -7  -4   5  298.57   12.20
  -7   4  -5  285.67   11.00
  -7  -4   5  275.27   11.80
  -7  -4   5  249.08   15.50
  -7  -4   5  278.47   11.60
  -7  -4   5  290.87   13.40
  -7   4  -5  263.87   12.60
  -8   4   5   10.30    1.90
  -8  -4  -5   10.30    1.30
  -8   4   5   12.60    2.60
  -8   4   5   20.80    8.20
  -8   4   5    8.70    1.20
  -8   4   5   12.40    2.20
  -8   4   5   12.10    1.30
  -8   4   5   12.30    3.40
  -8  -4   5   12.80    1.70
  -8  -4   5   12.00    2.50
   8   4   5    9.10    3.30
  -8   4  -5   11.90    1.10
  -8   4  -5   16.10    2.70
  -8  -4   5   13.80    1.80
  -8   4  -5    9.90    2.30
  -8  -4   5   12.90    1.60
  -8  -4   5   12.10    1.60
  -9   4   5  117.19    7.40
  -9   4   5  127.09    9.50
  -9   4   5  126.09    6.00
  -9  -4  -5  122.19    5.60
  -9   4   5  129.19    5.50
  -9   4   5  135.99   22.00
  -9   4   5  129.49    6.80
  -9  -4  -5  124.79    5.50
  -9   4   5  129.39    5.30
   9   4  -5  117.49   12.30
  -9  -4   5  126.49    6.00
  -9  -4   5  122.59    6.30
  -9   4  -5  124.09    6.80
   9   4   5  118.29    9.60
  -9  -4   5  121.49    5.90
  -9   4  -5  128.39    7.10
  -9  -4   5  122.89    6.10
  -9  -4   5  124.49    7.40
 -10   4   5    2.30    1.90
 -10   4   5    0.40    0.50
 -10  -4  -5    1.50    0.60
 -10   4   5    1.50    1.00
 -10   4   5    0.80    0.70
 -10   4   5    0.30    1.80
 -10  -4  -5    1.30    0.50
 -10  -4   5    1.50    0.90
 -10  -4   5    1.40    0.80
 -10   4  -5    3.00    1.30
 -10  -4   5    1.90    0.80
 -10  -4   5    2.10    0.90
 -11   4   5   13.90    1.10
 -11   4   5    9.20    2.40
 -11   4   5   10.10    2.30
 -11   4   5   15.10    1.90
 -11   4   5   15.80    1.50
 -11  -4  -5   12.10    1.20
 -11  -4   5   12.10    1.40
 -11  -4   5   12.20    1.50
 -11  -4   5   14.00    1.50
 -11   4  -5   12.10    1.90
 -11  -4   5   16.00    1.60
 -12   4   5    4.10    0.80
 -12   4   5    3.60    1.60
 -12  -4  -5    4.80    0.70
 -12   4   5    4.80    0.80
 -12   4   5    3.00    1.30
 -12  -4   5    5.90    0.90
 -12  -4   5    3.60    0.70
 -12  -4   5    4.50    0.80
   0   5   5   -0.50    1.30
   0   5  -5    0.90    3.10
   0  -5  -5   -7.60    4.30
   0   5   5   -0.40    0.60
  -1   5   5  108.19    6.50
  -1   5   5   94.59   10.60
   1   5  -5  105.59   14.20
  -1  -5  -5  119.49   16.20
  -1   5  -5   94.69   13.30
   1   5   5  107.89    6.20
   1  -5  -5   96.79   16.50
   2   5  -5    6.10    8.50
  -2   5   5    3.20    1.70
  -2   5   5    3.40    2.70
  -2  -5  -5    0.50    5.20
  -2   5  -5    3.20    2.10
   2   5   5    3.50    1.30
  -2   5  -5    5.80    5.30
  -3  -5  -5  189.38   21.00
  -3   5   5  179.68   12.20
  -3   5   5  178.08   18.00
   3   5  -5  174.78   23.50
  -3   5  -5  185.88   13.90
   3   5   5  188.18   10.10
  -3   5  -5  202.48   20.20
  -4  -5  -5   -7.00    5.00
  -4   5   5    3.40    3.00
  -4   5  -5    0.20    2.80
   4   5   5    1.20    1.10
  -5   5   5   11.20    2.80
  -5  -5  -5    7.30    8.70
  -5   5   5    7.70    1.80
  -5  -5   5   12.70    1.30
  -5  -5   5   11.70    1.20
   5   5   5   10.60    2.70
  -5   5  -5    8.90    5.10
  -5   5  -5    7.40    5.40
  -6   5   5    5.70    1.70
  -6   5   5    7.70    2.60
  -6   5   5    6.70    1.20
  -6   5   5   11.10    1.80
  -6   5   5    3.50    4.60
  -6  -5  -5    9.10    8.00
  -6  -5  -5   10.10    1.10
   6   5   5    8.10    0.60
  -6  -5   5    7.40    1.50
  -6   5  -5    6.40    6.10
  -6  -5   5    9.90    1.40
  -6  -5   5    5.40    1.00
  -6  -5   5    5.40   16.90
   6   5   5    5.20    1.80
  -6  -5   5    6.90    7.10
  -6  -5   5    6.10    1.10
  -7  -5  -5   -1.30   15.90
  -7   5   5   -1.00    1.40
  -7  -5  -5    1.80    0.60
  -7  -5  -5   -1.90    8.30
  -7   5   5    1.80    2.00
  -7   5   5    1.20    1.10
  -7   5   5    0.30    6.30
  -7   5   5    0.60    0.60
  -7  -5  -5    0.60    0.40
  -7   5   5    1.90    0.60
   7   5   5    0.70    0.30
  -7   5  -5   -1.40    1.20
  -7  -5   5    0.80    0.60
  -7  -5   5    0.50    0.70
  -7  -5   5    0.90   14.90
  -7  -5   5    0.50    0.70
   7   5   5   -2.10    1.30
  -7  -5   5    6.30    6.40
  -7  -5   5    0.50    0.60
  -8   5   5    7.70    2.10
  -8  -5  -5    9.30    1.00
  -8   5   5   -3.10    9.30
  -8   5   5    8.00    1.20
  -8   5   5    6.60    1.70
  -8   5   5    7.90    1.10
  -8   5   5    9.00    3.20
  -8  -5  -5    7.80    1.10
  -8  -5   5    6.50    1.30
  -8   5  -5    8.20    2.10
  -8  -5   5    6.90    1.20
  -8  -5   5    7.10    1.30
  -8  -5   5    6.70    1.20
   8   5   5    5.90    2.50
  -9   5   5   14.40    3.60
  -9   5   5   17.20    2.20
  -9   5   5   17.40    3.10
  -9  -5  -5   16.50    1.30
  -9   5   5   16.00    1.30
  -9  -5  -5   14.90    1.40
  -9   5   5   21.80   13.90
  -9   5   5   16.90    1.70
  -9  -5   5   13.40    1.70
  -9  -5   5   16.10    1.80
  -9   5  -5   13.70    2.50
   9   5   5   11.30    3.80
  -9  -5   5   16.50    1.80
  -9  -5   5   14.10    1.70
 -10   5   5    4.40    0.80
 -10  -5  -5    4.90    0.90
 -10   5   5    2.50    2.10
 -10   5   5    3.50    0.60
 -10  -5  -5    4.40    0.70
 -10   5   5    4.60    2.00
 -10   5   5    4.00    1.30
 -10  -5   5    2.80    0.80
 -10  -5   5    3.60    0.80
 -10   5  -5    4.90    1.40
 -10  -5   5    4.10    1.00
 -10  -5   5    3.90    0.90
 -11  -5  -5   15.20    1.20
 -11   5   5   16.00    1.80
 -11   5   5   17.70    1.30
 -11   5   5   17.40    3.30
 -11   5   5   20.70    2.90
 -11  -5   5   17.50    1.60
 -11  -5   5   15.30    1.50
 -11  -5   5   16.70    1.40
 -11   5  -5   13.30    1.90
 -12   5   5    3.70    1.30
 -12  -5  -5    4.70    0.60
 -12   5   5    3.40    1.50
 -12   5   5    4.60    0.80
 -12  -5   5    4.00    0.70
 -12  -5   5    4.30    0.70
 -12  -5   5    3.80    0.70
   0   6   5   48.10    7.20
   0  -6  -5   69.79   16.00
   0   6  -5   57.39   11.50
   0   6   5   46.30    3.80
   1   6  -5   69.79   13.10
  -1   6   5   54.39    8.70
  -1  -6  -5   53.09   15.30
  -1   6   5   49.00    4.30
  -1   6  -5   65.99   11.90
   1  -6  -5   25.50   14.80
   1   6   5   55.49    4.20
  -2   6   5   76.09   10.80
  -2   6   5   69.89    6.30
   2   6  -5   59.89   13.70
  -2  -6  -5   73.69   15.20
  -2   6  -5   64.19   12.30
  -2   6  -5   67.39    7.50
   2   6   5   72.09    5.20
   2  -6  -5   68.49   21.00
  -3  -6  -5   23.00   10.30
   3   6  -5   35.40   18.90
  -3   6   5   18.50    4.20
  -3   6   5   16.10    5.30
  -3   6  -5   39.00    7.90
   3   6   5   24.40    3.10
  -3   6  -5   31.80    9.90
  -4   6   5    0.30    1.90
  -4  -6  -5    2.50    6.20
  -4   6   5   -0.50    3.20
  -4   6  -5   -1.80    4.20
   4   6   5    0.60    0.90
  -4   6  -5    0.70    3.10
  -5   6   5   22.40    2.30
  -5   6   5   21.50    2.60
  -5   6   5   18.40    3.80
   5   6  -5   17.20    1.00
  -5   6   5   27.20   10.00
   5   6   5   18.80    1.00
   5   6   5   23.20    3.40
  -5   6  -5   18.60    7.10
  -5  -6   5   20.40    1.60
  -5   6  -5   18.00    2.80
  -6  -6  -5   -4.50    7.80
  -6   6   5    5.10    4.60
  -6  -6  -5    0.70    0.60
  -6   6   5    1.20    1.00
  -6   6   5    2.30    1.60
   6   6  -5    1.00    0.30
  -6   6   5    1.90    2.30
  -6  -6   5    1.90    0.90
  -6   6  -5    5.10    1.60
   6   6   5    1.50    0.30
   6   6   5    1.10    1.40
  -6  -6   5    0.60    0.60
  -6  -6   5    2.60    0.80
  -6  -6   5    1.20    0.70
  -7   6   5   39.80    2.60
  -7  -6  -5   39.30    2.10
  -7  -6  -5   42.00    2.50
   7   6  -5   36.30    1.80
  -7   6   5   40.20    4.10
  -7  -6  -5   25.60   12.40
  -7   6   5   43.60    5.70
  -7   6   5   30.40   10.80
   7   6   5   41.40    5.20
  -7  -6   5   45.30   13.80
  -7  -6   5   40.90    2.70
  -7  -6   5   41.50    2.70
  -7   6  -5   44.00    3.80
  -7  -6   5   38.70    2.60
   7   6   5   39.90    1.80
  -7  -6   5   37.50    2.70
  -8   6   5  145.49    6.10
  -8   6   5  141.39    7.20
   8   6  -5  139.89   13.40
  -8  -6  -5  133.99    6.00
  -8   6   5  136.99   10.20
  -8   6   5  124.59   21.30
   8   6  -5  125.69    5.30
  -8  -6  -5   99.99   14.00
  -8   6   5  135.39    8.10
  -8  -6  -5  131.39    5.60
  -8   6  -5  134.09    7.40
   8   6   5  130.99   10.20
  -8  -6   5  133.79    6.20
  -8  -6   5  139.09    6.30
  -8  -6   5  133.29    6.30
  -8  -6   5  132.39    6.20
  -9   6   5    0.70    2.00
  -9   6   5    0.90    0.60
  -9   6   5    1.60    1.60
  -9   6   5    1.20    1.80
  -9  -6   5    0.70    0.80
  -9   6  -5    2.40    1.80
  -9  -6   5   -0.50    0.60
  -9  -6   5    1.20    0.80
 -10  -6  -5    2.50    0.70
 -10   6   5    2.90    1.80
 -10   6   5    0.60    1.70
 -10   6   5    1.80    0.90
 -10   6  -5    4.50    1.50
 -10  -6   5    1.60    0.70
 -10  -6   5    1.00    0.70
 -10  -6   5    1.80    0.60
 -11   6   5   11.00    1.40
 -11  -6  -5    9.40    0.90
 -11   6   5    9.20    2.00
 -11   6   5    6.90    2.10
 -11  -6   5   11.10    1.20
 -11  -6   5   10.30    1.20
 -11  -6   5   10.10    1.00
 -11   6  -5    9.80    1.40
 -12   6   5    1.00    0.40
 -12  -6  -5    0.90    0.30
 -12   6   5    1.20    1.90
 -12   6   5    0.50    1.00
 -12  -6   5    0.50    0.40
 -12  -6   5    0.60    0.40
   0  -7  -5   -9.90   10.40
   0   7  -5    2.00    7.00
   0   7   5    0.60    2.20
  -1  -7  -5   51.89   18.90
  -1   7   5   39.40    4.00
   1   7  -5   43.40   12.80
  -1   7   5   50.29    8.70
   1   7   5   34.30    3.50
  -1   7  -5   39.00    3.30
   1  -7  -5   36.90   18.40
  -1   7  -5   26.20   11.10
   1   7   5   34.50    6.10
  -2   7   5   27.40    8.50
  -2   7   5   24.90    4.20
  -2  -7  -5   38.50   14.30
   2   7  -5   21.10   11.70
  -2   7  -5   29.30    5.30
  -2   7  -5   40.20   12.20
   2   7   5   30.40    3.50
  -3   7   5   94.99    5.70
  -3  -7  -5  111.29   19.20
  -3   7   5  101.09   15.40
   3   7  -5   98.39    4.00
  -3   7   5   91.69    8.70
  -3   7  -5  115.79   13.10
  -3   7  -5  115.89   17.30
   3   7   5  113.99    7.50
   3   7   5   96.59    4.00
  -4   7   5    9.70    5.30
  -4   7   5    9.20    2.00
  -4   7   5    8.80    1.60
  -4   7   5    7.50    2.70
  -4  -7  -5    2.90    8.30
   4   7   5    7.40    2.20
  -4   7  -5    7.30    1.70
  -4  -7   5   10.90    1.40
  -4   7  -5    3.30    4.60
  -5  -7  -5   13.00    8.90
  -5   7   5   14.90   11.60
  -5   7   5    3.70    1.40
  -5   7   5    0.60    1.70
   5   7   5    0.90    1.50
  -5  -7   5   -2.30    6.70
  -6  -7  -5   10.90    1.20
  -6   7   5    6.40    2.80
  -6   7   5   -1.00    7.80
  -6   7   5    8.90    3.50
   6   7  -5    7.70    0.70
  -6   7   5   10.60    1.80
  -6  -7   5   16.30   10.30
  -6  -7   5    8.20    1.20
  -6   7  -5    6.90    2.00
   6   7   5    8.40    0.70
   6   7   5    6.40    2.40
  -6  -7   5   10.00    2.10
  -6  -7   5    8.10    1.10
   7   7  -5   33.00    7.30
  -7   7   5   44.50    4.40
  -7   7   5   48.10    3.60
  -7   7   5   28.30   10.20
   7   7  -5   43.50    2.00
  -7  -7  -5   45.00   28.30
  -7  -7  -5   44.90    2.60
  -7   7   5   44.50    6.00
  -7  -7   5   49.60   20.90
   7   7   5   46.40    2.00
  -7  -7   5   43.30    2.70
  -7  -7   5   41.30    2.90
   7   7   5   47.80    5.70
  -7  -7   5   45.00    2.80
  -7   7  -5   39.40    3.90
  -8   7   5  158.18    7.50
   8   7  -5  137.89    5.70
  -8   7   5  136.39   10.30
   8   7  -5  133.39   12.90
  -8   7   5  149.29    8.50
  -8  -7  -5  144.99    6.30
   8   7   5  143.69    5.60
   8   7   5  140.89   10.90
  -8  -7   5  145.69    6.40
  -8  -7   5  144.19    6.60
  -8  -7   5  142.79    6.70
  -8   7  -5  150.58    7.90
   9   7  -5   35.30    1.80
  -9   7   5   38.30    5.30
  -9  -7  -5   40.90    2.30
  -9   7   5   40.00    4.10
  -9   7   5   43.40    3.10
  -9  -7   5   38.90    2.50
  -9   7  -5   42.10    3.60
  -9  -7   5   39.60    2.70
  -9  -7   5   39.70    2.40
 -10  -7  -5   25.70    1.70
 -10   7   5   26.30    2.20
 -10   7   5   25.00    3.30
 -10   7   5   24.10    4.10
 -10  -7   5   24.40    2.00
 -10  -7   5   26.10    1.90
 -10  -7   5   27.20    2.30
 -11   7   5   21.80    3.00
 -11   7   5   23.30    2.60
 -11  -7  -5   21.50    1.40
 -11   7   5   21.40    1.60
 -11   7  -5   17.50    1.90
 -11  -7   5   19.70    1.60
 -11  -7   5   23.70    1.50
 -11  -7   5   19.90    1.40
 -12   7   5    4.90    1.50
 -12   7   5    6.20    1.40
 -12  -7   5    9.40    0.90
 -12  -7   5    7.50    0.70
   0   8  -5  144.49    8.80
   0   8   5  138.49    5.60
   0  -8  -5  156.98   30.90
   0   8  -5  143.99    5.60
   0   8   5  151.38    8.90
   0  -8  -5  142.49    5.60
   0   8  -5  155.08   23.10
   0   8   5  145.09   15.20
  -1  -8  -5   16.20    0.90
  -1   8   5   15.20    3.10
  -1  -8  -5   21.40   12.80
  -1   8   5   15.30    0.80
   1   8  -5   19.50   10.00
   1   8  -5   14.10    0.90
   1   8  -5   19.00    3.60
  -1   8   5   26.90    8.10
   1  -8  -5    5.60   22.30
  -1   8  -5   24.70    9.70
   1  -8  -5   15.80    0.90
   1   8   5   16.20    2.60
   1   8   5   15.90    0.90
  -1   8  -5   16.20    0.90
  -2  -8  -5   -3.90   11.10
  -2   8   5   15.70    3.90
  -2   8   5    6.90    4.70
   2   8  -5    9.30    0.70
   2   8  -5    4.40   15.10
   2   8   5    9.50    2.40
  -2   8  -5   10.30    5.10
  -2   8  -5    3.70    6.00
   2   8   5    8.40    0.70
  -2   8  -5    9.80    0.70
   2  -8  -5   11.00    0.90
  -2  -8   5   10.70    1.10
  -3   8   5  117.09   17.50
  -3  -8  -5  126.39   28.20
  -3   8   5  116.09    5.80
   3   8  -5  105.09    4.30
  -3   8   5  106.19    6.20
  -3  -8  -5  105.09    4.20
  -3   8  -5  146.29   21.80
  -3   8  -5  100.19   14.70
   3  -8  -5  101.89    4.30
   3   8   5  121.69    8.20
   3   8   5  103.59    4.30
  -4  -8  -5   13.20   11.20
   4   8  -5   11.00    0.80
  -4   8   5   13.40    2.00
  -4   8   5   16.50    3.80
  -4  -8  -5   10.40    0.60
  -4   8   5   12.40    2.30
  -4  -8  -5   11.00    1.40
  -4   8   5   20.70    9.00
   4   8   5   10.40    0.80
   4   8   5   10.30    2.60
  -4   8  -5    7.30    6.20
   4  -8  -5   11.90    0.80
  -4   8  -5   12.90    2.30
  -4  -8   5   11.40    1.30
  -5   8   5  163.38   11.50
  -5   8   5  199.18   26.20
  -5  -8  -5  159.58    7.10
  -5   8   5  174.48    9.10
   5   8  -5  161.98   13.40
  -5  -8  -5  173.98   25.40
  -5   8   5  181.08    8.30
   5   8  -5  169.98    6.60
   5   8   5  172.38    6.60
   5  -8  -5  165.58    6.60
  -5  -8   5  142.59   24.00
  -5  -8   5  164.98    7.30
  -5   8  -5  178.48    9.10
   5   8   5  175.28   11.30
  -6   8   5  -12.20    6.50
   6   8  -5    2.60    0.40
  -6   8   5    3.30    1.20
   6   8  -5    3.30    3.10
  -6  -8  -5   -8.90   12.40
  -6   8   5    2.60    1.80
  -6  -8  -5    2.40    0.70
  -6   8   5    2.10    2.70
  -6  -8   5    2.10    0.70
   6   8   5   -1.10    1.70
  -6   8  -5    2.90    1.70
  -6  -8   5    6.70   10.40
  -6  -8   5    3.00    1.00
   6   8   5    2.60    0.50
  -7   8   5  131.89   10.30
  -7   8   5  151.48    7.20
   7   8  -5  136.49    5.60
  -7   8   5  145.49   24.40
  -7  -8  -5  145.89    6.20
   7   8  -5  133.19   12.90
  -7   8   5  143.29    8.30
   7   8   5  144.49    5.60
  -7  -8   5  139.49    6.60
   7   8   5  130.79   10.40
  -7  -8   5  124.99   21.50
  -7   8  -5  141.89    7.70
  -7  -8   5  144.99    6.50
  -8  -8  -5    1.00    0.60
  -8   8   5    1.00    2.60
   8   8  -5    1.20    0.30
  -8   8   5    1.70    0.80
  -8  -8   5    0.00    1.30
   8   8   5    0.90    0.30
  -8   8  -5    1.70    1.30
  -8  -8   5    0.50    0.80
  -8  -8   5    1.10    0.50
  -9  -8  -5   46.10    2.50
  -9   8   5   46.50    3.00
  -9   8   5   43.60    4.20
   9   8  -5   44.50    2.00
  -9   8   5   43.20    5.30
  -9  -8   5   45.90    2.70
  -9  -8   5   46.00    2.90
  -9   8  -5   45.80    3.70
  -9  -8   5   48.80    2.90
 -10   8   5   -0.10    1.40
 -10   8   5    0.20    1.20
 -10  -8  -5    0.50    0.40
 -10  -8   5    0.20    0.60
 -10   8  -5   -0.90    0.90
 -11   8   5   61.49    4.50
 -11  -8  -5   59.39    2.50
 -11   8   5   62.79    3.90
 -11  -8   5   59.99    2.70
 -11  -8   5   56.39    2.90
   0  -9  -5   27.90   23.50
   0   9  -5    1.80    2.10
   0   9   5    1.50    1.40
   0   9   5    1.00    3.00
  -1   9   5   35.80    9.50
  -1  -9  -5   29.50   15.40
  -1   9   5   38.60    1.70
   1   9  -5   39.40    1.80
  -1   9   5   43.00    5.40
  -1  -9  -5   40.70    1.80
   1  -9  -5   37.00    1.80
  -1   9  -5   39.50    1.80
   1   9   5   40.30    1.80
   1   9   5   35.90    9.20
   1   9   5   41.20    4.40
  -1  -9   5   38.40    1.80
  -2   9   5   83.29   14.80
  -2  -9  -5   49.50   22.80
   2   9  -5   61.39    6.80
   2   9  -5   74.49    3.10
  -2  -9  -5   74.09    3.00
   2   9   5   74.09   10.30
   2  -9  -5   69.09    3.00
  -2   9  -5   58.09   10.80
   2   9   5   72.29    3.00
  -2   9  -5   74.29    3.00
  -2  -9   5   72.29    3.00
   2   9   5   81.59    6.40
   3   9  -5  215.18    8.50
  -3   9   5  241.28   10.20
   3   9  -5  213.18   18.70
  -3  -9  -5  247.48   32.60
  -3   9   5  231.48   10.90
  -3  -9  -5  218.08    8.40
  -3   9   5  198.38   24.90
  -3  -9   5  211.08   30.10
   3  -9  -5  215.88    8.50
  -3  -9   5  219.68    8.50
   3   9   5  228.88   12.90
   3   9   5  216.18    8.50
  -3   9  -5  231.78   21.80
  -4  -9  -5   10.50    0.60
   4   9  -5    7.20    3.50
  -4   9   5    3.50   10.20
  -4   9   5   11.10    1.90
  -4   9   5   15.90    5.80
  -4  -9  -5   -0.30   11.00
  -4  -9  -5    8.30    1.30
  -4  -9   5   10.20    0.70
  -4  -9   5   16.10   11.10
   4  -9  -5    9.70    0.70
  -4   9  -5   10.10    2.30
  -4  -9   5    9.10    1.20
  -5  -9  -5   -5.00   11.50
   5   9  -5    0.70    0.30
  -5   9   5    2.10    8.40
  -5   9   5    2.40    1.70
   5   9  -5    1.40    2.50
  -5  -9  -5   -1.20    0.60
  -5   9   5   -0.40    1.20
  -5   9   5   -0.40    2.00
  -5  -9   5    0.20    0.50
  -5  -9   5    0.30   14.30
  -5   9  -5   -0.60    1.50
   5   9   5    1.60    1.70
   5   9   5    0.70    0.30
  -6   9   5   28.90   13.40
  -6  -9  -5   28.40    1.90
   6   9  -5   25.30    5.70
  -6   9   5   25.10    3.50
   6   9  -5   30.50    1.50
  -6  -9  -5   24.00   17.70
  -6   9   5   26.60    5.00
  -6   9   5   27.10    2.50
  -6  -9   5   40.30   19.10
  -6  -9   5   30.30    2.40
  -6   9  -5   33.10    3.60
   6  -9  -5   30.30    1.40
   6   9   5   29.00    1.50
   6   9   5   25.40    4.60
  -6  -9   5   25.80    2.10
  -7   9   5   -1.30    0.80
  -7  -9  -5   -7.30   18.50
  -7   9   5   -0.60    1.80
  -7   9   5    0.70    1.40
   7   9   5   -0.10    0.30
  -7  -9   5    0.80    0.60
  -7   9  -5   -0.90    1.60
  -7  -9   5  -10.20   14.50
  -7  -9   5   -0.30    0.60
   7  -9  -5    0.40    0.30
   8   9  -5   -0.10    0.20
  -8   9   5    1.00    0.80
  -8  -9  -5   -0.10    0.50
  -8   9   5    0.20    1.40
  -8   9   5    0.00    1.70
   8  -9   5   -0.10    0.30
  -8  -9   5    0.60    0.50
  -8   9  -5   -1.00    1.10
  -8  -9   5    0.40    0.60
  -9  -9  -5   31.30    1.80
  -9   9   5   31.20    3.50
  -9   9   5   29.40    4.30
   9   9  -5   32.90    1.50
  -9   9  -5   39.10    4.20
  -9  -9   5   31.10    2.20
  -9  -9   5   33.10    2.00
 -10   9   5    2.80    1.40
 -10  -9  -5    4.90    0.50
 -10   9   5    2.30    1.60
 -10  -9   5    4.10    0.80
 -10   9  -5    5.20    1.20
 -10  -9   5    5.60    1.00
 -11   9   5   27.60    2.40
 -11   9   5   20.80    2.10
 -11  -9   5   28.50    1.70
   0 -10   5   74.49   27.10
   0  10   5    9.30    3.30
   0 -10  -5   15.80    0.90
   0  10   5    6.80    5.00
   0  10  -5   15.80    1.00
   0 -10   5   15.80    1.00
   0  10   5   15.40    0.90
  -1 -10  -5   71.09    3.20
  -1 -10  -5   44.50   23.40
  -1  10   5   54.09   13.30
   1 -10   5   76.39    3.30
   1  10  -5   74.99    3.30
  -1  10  -5   73.59    3.00
   1  10   5   72.59    6.30
   1  10   5   82.09   13.70
  -1 -10   5   72.89    3.20
  -1  10  -5   67.69   11.00
   1  10   5   69.89    3.00
   1 -10  -5   71.19    3.10
  -1 -10   5   64.99   26.50
  -2 -10  -5   89.09   22.50
   2  10  -5   59.49    7.10
   2  10  -5   54.69    2.50
  -2  10   5   50.79   14.70
   2 -10  -5   54.49    2.70
  -2  10  -5   39.10   10.40
  -2 -10   5   75.49   24.80
   2  10   5   57.19    5.60
  -2  10  -5   55.29    2.30
   2  10   5   58.59    2.40
   2  10   5   33.20   12.00
  -3 -10  -5   16.90    0.90
  -3  10   5   20.90    3.20
   3  10  -5   14.60    1.00
  -3 -10  -5   78.29   25.90
   3  10  -5   17.30    4.90
  -3  10   5   32.30    9.70
  -3 -10   5   15.30    1.00
   3 -10  -5   16.00    1.00
   3  10   5   16.00    1.00
  -3  10  -5   28.50   14.90
  -3 -10   5   36.50   16.10
   3  10   5   11.10    2.80
  -4 -10  -5   13.10   14.80
  -4  10   5    5.90    2.00
   4  10  -5    8.40    0.80
   4  10  -5    6.30    3.70
  -4  10   5    4.50    2.70
  -4 -10  -5    7.50    0.60
  -4 -10  -5    6.00    1.00
  -4  10  -5    3.80   14.60
   4  10   5    7.50    0.70
  -4 -10   5    7.70    1.10
   4  10   5    6.70    2.50
   4 -10  -5    7.60    0.70
  -4  10  -5    4.80    1.90
  -4 -10   5    6.80    0.60
  -4 -10   5   -3.50   20.80
  -5  10   5   37.10    5.40
  -5  10   5   38.60    4.10
  -5 -10  -5   38.40    2.30
  -5 -10  -5   25.10   18.60
   5  10  -5   41.30    1.90
   5  10  -5   25.80    5.50
  -5  10   5   39.30   18.30
   5 -10   5   38.80    1.90
   5 -10  -5   42.00    1.80
  -5 -10   5   39.70    2.40
   5  10   5   40.60    1.90
  -5  10  -5   42.10    4.00
  -5 -10   5   66.49   21.70
   5  10   5   37.00    5.10
  -6 -10  -5   15.20   17.70
  -6 -10  -5   34.40    2.80
  -6  10   5   33.70    3.90
   6  10  -5   38.30    1.80
  -6  10   5   34.80    5.20
  -6 -10   5   44.10   23.40
  -6 -10   5   38.00    2.70
  -6  10  -5   37.10    4.10
   6  10   5   38.50    1.80
  -7  10   5    0.40    1.50
  -7  10   5    2.00    2.20
   7 -10   5    2.80    0.40
  -7 -10  -5    3.30    0.70
   7  10  -5    2.20    0.40
  -7 -10   5    2.20    0.60
  -7 -10   5    2.20    0.90
   7  10   5    2.30    0.40
  -7  10  -5    2.30    1.40
  -8  10   5    1.70    1.90
   8  10  -5    4.60    0.50
  -8  10   5    3.80    1.80
  -8 -10  -5    3.60    0.70
  -8 -10   5    4.40    0.70
  -8 -10   5    5.50    1.10
  -8  10  -5    4.30    1.50
   9  10  -5    0.40    0.30
  -9  10   5    1.90    1.60
  -9 -10  -5    1.10    0.50
  -9 -10   5    0.50    1.00
  -9 -10   5    0.00    0.60
  -9  10  -5    2.10    1.40
 -10  10   5    0.70    1.10
 -10  10   5   -0.60    1.20
 -10 -10   5   -0.30    0.60
   0  11   5    4.10    6.30
   0  11   5    4.70    5.20
   1 -11   5   11.90    0.90
  -1  11   5    5.70    7.40
  -1 -11  -5   11.70    0.80
   1  11  -5   11.80    0.90
   1 -11  -5   12.00    0.80
   1  11   5    2.70    7.30
   1  11   5    8.20    3.40
  -1 -11   5   11.50    0.90
  -1  11  -5   10.90    0.80
  -1  11  -5   16.90    7.90
   1  11   5   11.60    0.80
  -2 -11  -5    3.20   31.60
  -2  11   5    4.80    7.30
  -2  11  -5    4.90    8.20
   2  11   5    9.30    6.40
   2  11   5    0.20    2.20
   3  11  -5   68.49    2.90
  -3 -11  -5   68.69    2.80
  -3 -11  -5   69.49   30.00
  -3  11   5   69.19   19.40
   3  11  -5   56.09    8.00
   3 -11   5   70.69    3.00
  -3  11   5   70.59    5.20
   3  11   5   71.09    2.90
   3 -11  -5   68.59    2.90
  -3 -11   5   64.39    3.30
   3  11   5   66.59    6.80
   3  11   5   60.39   12.20
  -3 -11   5   68.49    2.80
  -3  11  -5   49.99   16.50
  -3 -11   5   73.59   25.70
  -4  11   5    0.80    2.20
   4 -11   5    1.30    0.40
  -4 -11  -5  -11.10   23.40
  -4  11   5    0.50    1.40
  -4 -11  -5    1.00    0.20
   4  11  -5    1.30    0.40
  -4  11   5    4.40   11.10
   4  11  -5    8.90    4.60
   4 -11  -5    0.60    0.30
  -4  11  -5    1.20    1.30
  -4 -11   5   18.50   21.80
  -4 -11   5    1.80    0.70
   4  11   5    1.20    0.40
  -4 -11   5    0.30    0.20
  -5 -11  -5   90.99    4.60
  -5  11   5   80.99    9.40
  -5 -11  -5   47.00   33.70
   5 -11   5   91.59    3.90
   5 -11  -5   95.29    3.80
  -5 -11   5   73.69   40.10
  -5 -11   5   91.39    6.10
  -5  11  -5   89.49    6.30
  -5 -11   5   94.79    4.30
   6 -11   5   26.50    1.40
   6  11  -5   27.50    1.40
  -6  11   5   22.20    4.20
  -6  11   5   30.90    3.60
  -6 -11  -5   25.90    1.70
  -6 -11   5   28.40    2.20
   6 -11  -5   26.40    1.30
  -6  11  -5   24.50    3.10
   6  11   5   29.60    1.40
  -6 -11   5   28.90    1.80
   7 -11   5   16.00    0.90
  -7  11   5   12.90    3.10
   7  11  -5   17.30    1.00
  -7 -11  -5   15.60    1.50
  -7  11   5   13.10    2.50
  -7 -11   5   15.80    1.40
   7 -11  -5   18.30    1.10
  -7 -11   5   15.90    1.60
  -7  11  -5   14.50    2.40
   8 -11   5   17.30    0.90
  -8  11   5   17.50    3.10
   8  11  -5   19.80    1.00
  -8  11   5   24.40    2.90
  -8 -11   5   20.50    1.60
  -8  11  -5   14.60    2.20
  -8 -11   5   19.00    1.40
   9  11  -5    5.70    0.40
  -9  11   5    6.00    1.50
  -9  11   5    3.60    1.60
  -9  11  -5    6.70    1.10
  -9 -11   5    6.30    0.90
   0  12   5    4.90    8.40
   0  12  -5   17.40    8.50
   0 -12   5   11.80    0.90
   0 -12  -5   10.80    0.80
   0  12  -5   11.00    0.80
   1 -12   5    2.90    0.50
  -1 -12  -5    2.20    0.40
  -1  12   5   -5.80    9.50
   1  12  -5    3.20    0.50
  -1  12  -5    2.80    0.40
  -1 -12   5    2.90    0.40
   1  12   5   19.60    9.80
   1 -12  -5    2.90    0.40
  -1  12  -5   19.00   10.60
   1  12   5    2.60    0.40
  -2  12   5   48.60   18.80
  -2  12   5   62.89    4.90
  -2 -12  -5   60.19    2.60
   2  12  -5   63.09    2.70
   2 -12   5   60.59    2.70
   2  12   5   40.00   14.70
   2 -12  -5   58.89    2.60
   2  12   5   61.59    2.60
  -2 -12   5   74.69   38.90
  -2 -12   5   64.19    2.60
  -3 -12  -5   11.80   37.90
  -3 -12   5   28.40   36.10
  -4 -12  -5    0.60    0.20
  -4  12   5   -1.00    1.50
   4  12  -5    0.60    0.30
   4 -12   5    0.60    0.30
  -4  12   5    2.90    1.70
  -4  12  -5   -1.30    1.10
   4 -12  -5    0.80    0.30
   4  12   5    0.50    0.30
   5 -12   5   55.59    2.40
  -5  12   5   58.59    4.60
   5  12  -5   57.19    2.50
  -5  12   5   51.79    5.80
  -5  12  -5   53.79    4.30
   5  12   5   57.49    2.40
  -5 -12   5   57.29    3.20
   5 -12  -5   56.89    2.40
  -6  12   5    0.60    1.30
   6  12  -5    0.40    0.30
   6 -12   5    0.20    0.20
  -6  12   5    0.50    1.50
  -6  12  -5    0.70    1.30
   6 -12  -5    0.50    0.20
  -6 -12   5   -0.40    0.60
   7 -12   5    0.30    0.20
  -7  12   5    0.90    1.40
   7  12  -5    0.50    0.30
  -7  12   5   -0.10    1.40
  -7 -12   5    0.30    0.50
  -7  12  -5   -0.10    1.00
  -8  12   5    8.50    1.60
   8 -12   5    6.30    0.60
  -8  12   5    6.10    1.80
  -8  12  -5    7.40    1.40
  -8 -12   5    9.70    1.00
  -9  12   5   75.59    4.10
   0 -13   5    0.00    0.30
   0 -13  -5    0.20    0.30
   0  13  -5    0.20    0.20
  -1  13   5  140.19    7.60
  -1 -13  -5  133.29    5.10
   1 -13   5  131.39    5.20
   1  13  -5  130.59    5.20
  -1  13  -5  128.89    5.10
   1 -13  -5  129.59    5.10
  -1 -13   5  131.99    5.20
  -2  13   5    1.30    1.30
   2  13  -5    0.20    0.30
  -2 -13  -5   -0.10    0.20
  -2  13   5    0.40    1.90
   2 -13   5   -0.20    0.20
   2 -13  -5    0.70    0.30
  -2 -13   5    0.20    0.20
  -3  13   5   24.60    3.20
  -3 -13  -5   21.80    1.00
   3  13  -5   22.40    1.20
   3 -13   5   20.50    1.10
  -3  13   5   16.60    3.70
  -3  13  -5   18.50    2.80
  -3 -13   5   20.20    1.00
   3 -13  -5   21.20    1.10
   4 -13   5    4.90    0.50
  -4  13   5    8.60    2.00
  -4  13   5    1.50    1.90
   4  13  -5    4.20    0.50
  -4 -13   5    4.40    1.00
   4 -13  -5    4.70    0.50
  -4  13  -5    4.00    1.50
   5  13  -5    9.00    0.70
  -5  13   5    8.80    1.90
  -5  13   5    4.30    2.00
   5 -13   5    8.70    0.60
   5 -13  -5    8.10    0.60
  -5  13  -5    5.20    1.70
  -5 -13   5    6.50    1.00
  -6  13   5    0.60    1.10
   6 -13   5    0.40    0.20
  -6  13   5    0.10    1.20
   6  13  -5    0.30    0.20
  -6  13  -5   -0.30    0.90
  -6 -13   5    0.10    0.50
   6 -13  -5    0.20    0.20
  -7  13   5   14.80    2.00
   7 -13   5   13.00    0.70
   7  13  -5   14.30    0.80
  -7 -13   5   12.20    1.10
  -7  13  -5   12.60    1.70
   7 -13  -5   11.40    0.60
  -8  13   5   14.70    1.70
   0 -14  -5   31.70    1.40
   0  14   5   30.10    3.10
   0  14  -5   31.10    1.40
   0 -14   5   31.30    1.50
  -1  14   5    2.40    1.30
  -1 -14  -5    1.80    0.30
   1  14  -5    1.90    0.30
   1 -14   5    2.10    0.40
  -1  14   5    1.20    1.80
  -1 -14   5    2.20    0.30
   1 -14  -5    1.90    0.30
  -2 -14  -5   26.90    1.20
   2 -14   5   27.50    1.30
   2  14  -5   26.70    1.30
  -2  14   5   28.00    3.00
  -2  14  -5   22.20    2.80
   2 -14  -5   27.70    1.30
  -3  14   5   30.10    4.90
   3 -14   5   39.90    1.80
   3  14  -5   40.00    1.70
  -3  14   5   45.90    3.60
  -3  14  -5   41.80    3.80
   3 -14  -5   39.60    1.70
  -3 -14   5   39.10    2.30
  -4  14   5    0.20    1.10
  -4  14   5    0.60    1.20
   4 -14   5   -0.10    0.20
   4 -14  -5    0.10    0.20
  -4 -14   5    0.00    0.50
  -4  14  -5    2.00    1.00
  -5  14   5    7.60    1.60
   5  14  -5    8.40    0.60
   5 -14   5    8.40    0.60
  -5 -14   5    7.60    1.00
   5 -14  -5    8.30    0.50
  -5  14  -5    5.70    1.90
   6  14  -5    6.50    0.50
   6 -14   5    4.70    0.50
  -6  14   5    3.00    1.20
  -6  14   5    4.00    1.20
  -6 -14   5    5.10    0.70
  -6  14  -5    3.80    1.10
   6 -14  -5    5.40    0.40
   0  15   5   -0.20    1.20
   0 -15  -5    0.20    0.20
   0 -15   5    0.10    0.20
   0  15   5    1.70    1.10
  -1 -15  -5   21.30    0.90
   1 -15   5   21.60    1.00
  -1  15   5   21.00    2.40
   1  15  -5   18.90    0.90
  -1 -15   5   21.80    1.00
  -1  15  -5   20.20    2.30
   1  15   5   21.00    2.20
   1 -15  -5   20.80    1.00
  -2  15   5    6.70    1.50
   2 -15   5    6.10    0.50
   2  15  -5    5.70    0.40
  -2  15   5    2.10    1.90
  -2 -15  -5    5.20    0.50
   2 -15  -5    6.20    0.50
   2  15   5    5.70    1.50
  -2  15  -5    5.60    1.40
  -2 -15   5    5.40    0.80
  -2 -15   5    5.80    0.40
  -3  15   5   -0.60    1.00
   3 -15   5    0.20    0.20
   3  15  -5    0.20    0.20
  -3  15   5   -0.70    1.20
  -3  15  -5   -1.00    0.90
   3 -15  -5    0.20    0.20
  -3 -15   5    0.20    0.40
   4  15  -5   23.60    1.10
   4 -15   5   25.30    1.10
  -4  15   5   23.90    2.10
  -4 -15   5   24.80    1.40
  -4  15  -5   21.30    2.00
   4 -15  -5   25.20    1.10
   4  15   5   24.10    1.80
   5 -15   5    0.70    0.20
   5  15  -5    1.00    0.20
  -5  15   5    1.40    0.80
   5 -15  -5    0.50    0.20
  -5 -15   5    0.90    0.30
  -5  15  -5    0.30    1.00
   0  16   5    9.00    1.40
   0 -16  -5   10.60    0.50
   0  16  -5   10.00    1.50
   0 -16   5   11.30    0.50
  -1  16   5   -0.80    0.60
   1 -16   5    0.30    0.20
  -1  16   5    0.50    1.20
   1  16  -5    0.30    0.60
  -1 -16   5    1.10    0.30
   1  16   5   -0.10    1.00
  -1  16  -5    2.10    0.80
   1  16   5    0.60    0.70
   1 -16  -5    1.30    0.30
   2 -16   5    9.20    0.50
  -2  16   5   10.80    1.20
  -2 -16   5    9.70    0.70
   2 -16  -5    9.60    0.50
  -2  16  -5    7.20    1.10
   0   0   6 5421.06  206.58
   0   0  -6 5526.05  220.08
   0   0   6 5628.54  206.08
  -1   0   6 2902.61  114.29
  -1   0  -6 3014.60  125.29
   1   0  -6 2953.20  125.79
   1   0   6 3004.20  109.09
  -1   0   6 2802.12  112.69
   1   0   6 2983.20  110.49
   2   0   6   83.19    4.80
   2   0  -6   61.59   11.70
  -2   0  -6   89.59   11.50
  -2   0   6   88.89    8.50
   3   0   6  154.28    7.60
  -3   0   6  152.68   12.90
  -3   0  -6  148.99   15.80
  -3   0   6  170.98   16.80
  -4   0   6  153.68   15.90
  -4   0  -6  162.08   16.30
   4   0   6  149.99    7.60
  -4   0   6  163.38   14.10
  -5   0  -6  568.44   34.60
   5   0   6  548.15   22.70
  -5   0   6  539.55   30.60
  -5   0   6  556.24   32.80
  -6   0   6   43.10    8.30
  -6   0  -6   43.40    8.20
  -6   0   6   47.80    3.40
  -6   0   6   47.50    3.00
   6   0   6   51.49    4.00
  -7   0   6   17.50    3.20
  -7   0   6   17.60    1.60
  -7   0   6   14.30    6.30
  -7   0   6   19.80    2.10
   7   0   6   19.00    2.80
  -7   0  -6   20.20    1.40
  -7   0  -6   19.40    1.40
  -7   0   6   23.40    2.60
  -7   0   6   19.10    1.90
  -8   0  -6   25.70    2.60
  -8   0   6   29.20    3.30
  -8   0  -6   26.70    1.80
  -8   0  -6   26.30    1.80
  -8   0   6   25.30    2.40
  -8   0   6   25.40    2.10
  -8   0   6   29.70    2.90
  -8   0   6   27.40    2.00
  -8   0   6   30.90    4.20
  -9   0  -6 1003.80   40.20
  -9   0   6 1093.09   44.00
  -9   0   6 1055.59   40.70
  -9   0  -6 1083.09   39.70
  -9   0  -6 1052.79   39.80
  -9   0   6 1057.39   41.60
  -9   0   6 1032.30   40.20
  -9   0   6 1077.79   41.40
  -9   0   6 1106.29   40.10
 -10   0   6   25.40    3.90
 -10   0   6   21.00    2.30
 -10   0   6   24.40    2.70
 -10   0  -6   23.10    1.70
 -10   0   6   26.50    3.30
 -10   0   6   24.50    2.10
 -10   0   6   24.40    1.80
 -11   0  -6   58.69    2.90
 -11   0   6   60.89    3.60
 -11   0   6   59.89    4.30
 -11   0   6   62.99    4.00
 -11   0   6   66.19    3.40
 -11   0   6   58.09    5.10
 -11   0   6   61.09    3.10
 -12   0   6   50.19    4.10
 -12   0   6   46.60    3.10
 -12   0   6   50.89    2.80
 -12   0   6   52.09    2.40
 -12   0   6   56.49    3.10
 -13   0   6    0.20    0.40
 -13   0   6    0.50    0.40
 -13   0   6    0.40    0.40
   0   1  -6   -4.80    3.70
   0  -1  -6    2.20    5.00
   0   1   6    1.20    0.90
   0  -1   6    1.10    1.00
   0   1   6    1.90    1.60
   0  -1   6    0.90    0.90
  -1   1   6  355.46   17.80
   1   1  -6  356.86   26.20
  -1  -1  -6  353.56   26.40
   1  -1   6  374.76   16.90
  -1   1   6  407.26   21.40
   1   1   6  345.77   17.30
   1   1   6  372.66   15.80
  -1   1  -6  386.26   26.80
  -1  -1   6  379.36   18.40
   1  -1  -6  385.46   27.70
  -2  -1  -6    0.80    4.10
   2   1  -6   12.30    6.10
  -2   1  -6    5.70    3.90
   2  -1  -6    8.30    6.20
   2   1   6    4.10    1.20
  -3   1   6   19.60    8.70
  -3   1   6   21.60    5.80
   3  -1   6   17.80    2.00
  -3  -1  -6   34.60    9.00
   3   1   6   19.50    2.10
  -3  -1   6   11.40    7.70
  -3   1  -6   16.60    6.50
  -3  -1   6   16.80    4.30
  -4   1   6  479.25   30.10
   4  -1   6  476.75   20.30
  -4  -1  -6  504.35   33.70
  -4   1   6  502.05   30.70
   4   1   6  519.75   20.90
  -4   1  -6  523.35   32.90
  -4  -1   6  492.55   27.60
  -5  -1  -6   -3.20    4.40
  -5   1   6    1.90    3.20
   5  -1   6    0.30    0.70
  -5   1   6    1.70    4.90
  -5   1  -6    0.90    3.40
  -5  -1   6    1.70    5.00
   5   1   6    1.20    0.80
  -5  -1   6    0.80    2.70
  -6   1   6    0.50    1.10
   6  -1   6    0.60    0.90
  -6  -1  -6    0.90    3.70
  -6   1   6    1.30    0.60
  -6   1   6    0.20    0.70
  -6   1   6   -0.20    2.90
  -6  -1   6   -2.80    2.10
  -6   1  -6    0.40    0.30
  -6  -1   6    0.20    0.60
  -6  -1   6    1.60    2.00
  -6  -1   6   -1.00    0.50
  -6  -1   6   -1.30    2.40
  -6   1  -6    3.30    4.00
  -6  -1   6    0.10    0.50
   6   1   6    2.50    1.20
  -7   1   6    1.80    1.30
  -7   1   6    0.70    0.70
  -7  -1  -6   -0.10    0.40
  -7   1   6    1.60    4.20
  -7   1   6   -0.30    0.70
   7  -1   6    0.90    1.50
  -7   1   6    0.00    1.40
  -7  -1  -6    2.20    3.80
  -7  -1  -6    0.50    0.40
  -7  -1   6    1.10    1.10
  -7   1  -6    0.10    0.80
  -7   1  -6   -0.20    0.40
  -7  -1   6    0.10    0.60
  -7  -1   6   -0.20    0.70
  -7  -1   6    0.50    0.60
   7   1   6   -0.20    1.20
  -7  -1   6    0.90    0.80
  -7  -1   6    0.00    1.00
  -7   1  -6    0.20    0.40
  -7  -1   6    2.60    3.60
  -8   1   6   83.59   13.20
  -8   1   6   98.39    7.60
  -8   1   6   97.29    6.00
  -8  -1  -6   95.09    4.40
  -8   1   6   99.59    4.60
  -8  -1  -6   91.09    4.30
  -8   1   6   98.39    5.70
  -8   1   6   95.39    4.70
  -8   1   6   95.19    5.10
  -8  -1   6   96.29    4.80
  -8  -1   6   95.29    5.50
   8   1   6   89.89    6.80
  -8   1  -6   95.29    4.40
  -8  -1   6  101.49    5.90
  -8  -1   6   98.49    4.70
  -8  -1   6   98.09    7.20
  -8   1  -6   93.49    5.40
  -8  -1   6   94.99    5.10
  -8   1  -6   94.69    4.30
  -9   1   6   24.40    2.00
  -9   1   6   25.00    1.90
  -9   1   6   23.00    3.30
  -9   1   6   21.90    2.30
  -9   1   6   23.60    4.20
  -9  -1  -6   21.40    1.70
  -9   1   6   20.40    2.60
  -9  -1  -6   23.70    1.80
  -9  -1   6   30.60    2.60
  -9   1  -6   24.20    1.70
  -9   1  -6   15.50    2.40
  -9  -1   6   24.00    1.90
  -9  -1   6   25.20    2.10
  -9  -1   6   30.40    3.50
  -9  -1   6   28.00    2.70
  -9  -1   6   28.60    4.20
 -10   1   6  473.65   19.80
 -10   1   6  465.55   19.10
 -10   1   6  487.75   18.70
 -10   1   6  531.85   19.40
 -10  -1  -6  468.15   18.30
 -10   1   6  462.05   20.00
 -10   1   6  477.15   22.30
 -10  -1  -6  474.35   18.20
 -10  -1   6  467.25   18.70
 -10  -1   6  478.45   18.70
 -10  -1   6  475.65   19.20
 -10  -1   6  462.65   19.50
 -10  -1   6  473.15   19.70
 -10   1  -6  466.75   18.20
 -10  -1   6  470.85   21.50
 -11   1   6    2.20    0.70
 -11   1   6    2.90    0.70
 -11  -1  -6    1.90    0.60
 -11   1   6    1.40    1.50
 -11   1   6    0.60    1.50
 -11   1   6    2.50    1.10
 -11   1   6    1.40    0.80
 -11  -1   6    0.80    0.80
 -11  -1   6    1.70    0.80
 -11  -1   6    1.50    1.60
 -11   1  -6    2.20    0.60
 -11  -1   6    2.00    0.60
 -11  -1   6    1.40    0.80
 -12   1   6    5.60    1.30
 -12   1   6    6.50    2.00
 -12  -1  -6    7.50    0.80
 -12   1   6    7.10    0.80
 -12   1   6    6.50    1.30
 -12   1   6    8.50    1.00
 -12  -1   6    6.90    1.20
 -12  -1   6    8.10    1.20
 -12  -1   6    6.90    0.90
 -12  -1   6    6.30    1.50
 -13   1   6   24.40    1.40
 -13   1   6   20.80    1.50
 -13  -1   6   21.70    1.40
 -13  -1   6   22.30    1.10
 -13  -1   6   25.30    1.40
   0  -2  -6  800.22   46.10
   0   2   6  799.82   36.80
   0   2   6  826.02   32.80
   0   2  -6  813.02   44.90
  -1   2   6  503.15   26.60
  -1  -2  -6  507.35   33.00
  -1   2   6  487.75   21.70
   1   2  -6  457.85   31.20
   1  -2   6  436.96   21.20
   1  -2  -6  467.55   32.50
  -1   2  -6  490.95   31.60
   1   2   6  474.25   22.70
   1   2   6  501.75   19.90
   2   2  -6   49.10    9.40
  -2   2   6   49.60    5.30
  -2  -2  -6   46.30    9.10
  -2   2   6   56.09    7.70
   2  -2   6   47.80    4.00
   2   2   6   49.90    3.50
  -2   2  -6   48.80    8.70
  -2  -2   6   45.10    5.10
   2  -2  -6   26.00   12.00
   2   2   6   47.80    4.30
  -3   2   6  152.28   16.60
   3  -2   6  141.49    7.80
  -3   2   6  141.29   14.30
  -3  -2  -6  139.19   16.70
  -3  -2   6  138.29   18.80
   3   2   6  149.59    7.60
  -3   2  -6  147.29   16.20
  -3  -2   6  143.09   11.00
   4  -2   6    8.80    1.80
  -4   2   6   17.50    7.70
  -4  -2  -6    5.90    6.60
  -4   2   6    8.20    5.50
   4   2   6    8.10    1.70
  -4   2  -6   15.80    5.60
  -4  -2   6    0.30    9.20
  -4  -2   6    9.70    3.80
  -5  -2  -6   25.90    9.50
   5  -2   6   22.80    2.60
  -5   2   6   18.20    6.50
  -5  -2   6   24.70    9.40
   5   2   6   26.10    3.00
  -5   2  -6   34.20    8.80
  -5  -2   6   29.50    6.60
  -6   2   6   14.30    2.30
  -6  -2  -6   12.00    6.60
  -6   2   6    8.10    5.60
  -6   2   6   14.20    2.80
  -6   2   6   15.60    2.00
  -6   2   6   16.00    1.60
  -6   2  -6   10.10    5.10
  -6  -2   6   25.00    6.80
  -6  -2   6   15.40    1.80
   6   2   6   16.30    2.60
  -6   2  -6   14.90    1.10
  -6  -2   6   14.80    1.40
  -6  -2   6   13.40    1.50
  -6   2  -6   15.10    1.20
  -6  -2   6   14.60    6.70
  -6  -2   6   17.90    2.00
  -7   2   6  581.54   25.70
  -7   2   6  583.54   23.00
  -7  -2  -6  558.34   21.40
  -7   2   6  553.64   22.20
  -7  -2  -6  509.65   30.40
  -7  -2  -6  521.05   30.10
  -7   2   6  562.34   23.30
  -7   2   6  562.54   21.70
  -7  -2  -6  557.04   21.60
  -7   2   6  559.74   38.00
  -7  -2   6  605.14   24.80
  -7  -2   6  580.04   22.70
  -7   2  -6  557.84   21.40
  -7  -2   6  556.34   21.90
  -7  -2   6  550.34   22.20
  -7   2  -6  571.54   21.30
  -7  -2   6  579.04   22.70
  -7  -2   6  555.54   21.70
   7   2   6  575.54   25.30
  -8   2   6    1.50    1.50
  -8  -2  -6    0.10    0.40
  -8   2   6    1.50    1.10
  -8  -2  -6    1.40    0.50
  -8   2   6   -0.10    0.50
  -8   2   6   -0.60    2.10
  -8   2   6    0.10    0.50
  -8  -2   6    1.30    0.90
  -8  -2   6    1.10    1.60
   8   2   6   -2.90    1.80
  -8   2  -6    0.50    1.00
  -8   2  -6    1.30    1.50
  -8  -2   6    0.80    0.60
  -9   2   6    7.10    1.40
  -9   2   6    8.60    1.20
  -9   2   6    7.20    3.00
  -9   2   6    6.00    2.00
  -9  -2  -6    8.50    1.20
  -9   2   6    7.80    1.20
  -9   2   6    3.20    6.60
  -9  -2  -6    7.40    1.00
  -9   2   6    6.50    1.70
  -9  -2   6    7.90    2.50
  -9  -2   6    9.30    1.60
  -9   2  -6    6.40    1.00
  -9  -2   6   10.40    1.40
  -9  -2   6    6.00    1.20
  -9   2  -6    7.90    1.80
  -9  -2   6    7.10    2.00
 -10   2   6    5.80    1.50
 -10   2   6    6.20    1.60
 -10   2   6    3.50    2.30
 -10   2   6    2.10    1.00
 -10   2   6    3.80    2.10
 -10   2   6    5.40    1.00
 -10  -2   6    5.20    1.50
 -10   2  -6    6.30    1.00
 -10  -2   6    5.60    2.10
 -10  -2   6    4.40    1.40
 -10  -2   6    6.50    1.40
 -11   2   6  130.49    5.40
 -11  -2  -6  129.29    5.50
 -11   2   6  130.79    5.60
 -11   2   6  134.79    6.10
 -11   2   6  114.49    8.20
 -11   2   6  133.59    7.00
 -11   2   6  128.49    6.70
 -11  -2   6  128.49    6.10
 -11  -2   6  129.49    5.70
 -11  -2   6  125.39    5.80
 -11  -2   6  130.59    6.30
 -11  -2   6  125.49    7.30
 -12   2   6    1.80    1.50
 -12   2   6    1.30    0.50
 -12   2   6    1.10    0.80
 -12   2   6    1.40    0.60
 -12  -2  -6    0.70    0.40
 -12   2   6    0.20    1.30
 -12  -2   6    0.70    0.60
 -12  -2   6    1.00    0.50
 -12  -2   6    0.50    0.60
 -12  -2   6    0.90    0.70
 -13   2   6    7.60    1.00
 -13   2   6   10.00    0.80
 -13  -2   6    8.20    0.90
 -13  -2   6    9.20    0.90
 -13  -2   6    8.80    0.60
   0   3  -6    7.20    4.30
   0  -3  -6    2.70    3.90
   1   3  -6   51.59    8.60
  -1  -3  -6   44.30   11.00
  -1   3   6   40.70    4.00
  -1   3   6   36.60    6.50
   1   3   6   43.30    3.30
  -1   3  -6   34.50    9.30
   1  -3  -6   52.79   11.70
   1   3   6   37.90    4.90
  -2   3   6  193.78   16.10
  -2   3   6  175.58   11.30
  -2  -3  -6  172.68   18.90
   2   3  -6  141.49   18.70
   2   3   6  183.78    8.90
   2   3   6  179.88   10.70
   2  -3  -6  156.48   20.00
  -2   3  -6  187.28    9.60
  -2   3  -6  207.78   18.70
  -3  -3  -6   38.30   10.70
  -3   3   6   48.40    8.30
   3   3  -6   32.30   13.80
  -3   3   6   61.09   13.10
  -3   3   6   33.00    5.00
  -3   3  -6   42.40   10.20
  -3  -3   6   22.10   13.80
   3   3   6   46.00    3.70
  -4   3   6   -7.70    7.60
  -4   3   6    0.90    2.20
  -4  -3  -6    8.70    6.30
  -4   3  -6   -2.30    3.50
  -4  -3   6   -4.30   12.00
   4   3   6    1.00    0.90
  -5  -3  -6    1.00    5.10
  -5   3   6    3.20    3.50
  -5  -3   6   12.20   11.30
   5   3   6    2.20    1.00
  -5   3  -6    2.60    4.10
  -6   3   6  123.59    5.90
  -6  -3  -6  109.89   16.50
  -6   3   6  138.89   12.10
  -6   3   6  131.59   16.50
  -6  -3  -6  131.99   18.50
  -6   3   6  117.19    6.80
  -6  -3   6  129.79   17.30
  -6  -3   6  132.09    6.50
   6   3   6  132.69    8.40
  -6   3  -6  124.49   12.80
  -6   3  -6  129.09    5.30
  -6  -3   6  125.29    6.20
  -6  -3   6  120.99    6.20
  -6  -3   6  120.79    5.60
  -6  -3   6  129.49    7.40
  -6  -3   6  117.79    5.90
  -7   3   6  425.66   16.60
  -7   3   6  447.86   21.00
  -7  -3  -6  421.76   16.60
  -7  -3  -6  417.66   16.40
  -7   3   6  433.46   37.10
  -7   3   6  425.96   16.40
  -7   3   6  445.26   18.10
  -7   3   6  423.66   18.30
  -7  -3  -6  341.17   27.80
  -7   3   6  429.66   17.20
  -7  -3   6  454.55   19.30
  -7   3  -6  404.46   17.90
  -7  -3   6  422.56   16.90
  -7   3  -6  440.96   16.30
   7   3   6  441.36   20.80
  -7  -3   6  436.46   17.60
  -7  -3   6  419.16   17.20
  -7  -3   6  424.96   16.80
  -7  -3   6  421.06   17.30
  -8   3   6   24.30    4.40
  -8   3   6   19.60    1.80
  -8   3   6    5.80    6.90
  -8   3   6   18.40    2.60
  -8   3   6   19.70    3.10
  -8   3   6   21.50    2.10
  -8   3   6   22.60    1.60
   8   3   6   25.30    4.10
  -8  -3   6   20.80    1.90
  -8   3  -6   21.30    1.50
  -8  -3   6   23.20    2.30
  -8  -3   6   18.70    1.90
  -8  -3   6   23.70    3.40
  -8  -3   6   19.70    2.10
  -8   3  -6   19.60    2.80
  -8   3  -6   16.00    2.60
  -9  -3  -6   38.10    2.20
  -9   3   6   39.30    2.90
  -9  -3  -6   39.50    2.40
  -9   3   6   42.00    2.20
  -9   3   6   18.40   10.30
  -9   3   6   37.60    5.10
  -9   3   6   37.90    3.50
  -9   3   6   39.80    2.40
  -9   3   6   36.80    4.00
  -9  -3   6   38.30    4.00
  -9  -3   6   35.70    2.80
  -9   3  -6   39.30    2.10
  -9  -3   6   37.80    2.80
  -9  -3   6   40.60    2.60
  -9  -3   6   40.70    3.10
   9   3   6   27.20    5.00
  -9   3  -6   31.90    3.20
 -10   3   6   82.29    3.90
 -10  -3  -6   78.09    3.60
 -10   3   6   74.59    6.90
 -10   3   6   77.29    5.50
 -10   3   6   80.19    5.00
 -10   3   6   83.29    3.60
 -10  -3  -6   79.49    3.80
 -10   3   6   81.19    4.30
 -10  -3   6   77.89    4.20
 -10  -3   6   76.49    4.00
 -10  -3   6   78.89    5.60
 -10  -3   6   77.39    4.40
 -10  -3   6   76.39    4.50
 -11   3   6   28.80    2.60
 -11  -3  -6   28.70    1.70
 -11   3   6   29.10    2.10
 -11   3   6   25.10    3.90
 -11   3   6   29.40    3.40
 -11   3   6   29.10    1.80
 -11  -3   6   27.90    2.10
 -11  -3   6   28.20    2.20
 -11  -3   6   29.30    2.30
 -11  -3   6   27.40    2.00
 -12   3   6  106.89    5.30
 -12   3   6   99.19    6.50
 -12  -3  -6  108.89    4.40
 -12   3   6  115.59    4.80
 -12   3   6  112.59    5.60
 -12  -3   6  113.79    4.70
 -12  -3   6  110.09    4.90
 -12  -3   6  107.99    4.90
 -12  -3   6  107.89    4.80
 -13   3   6   26.00    1.60
 -13  -3   6   30.20    1.50
 -13  -3   6   26.40    1.40
 -13  -3   6   28.10    1.30
   0  -4  -6  426.26   33.00
   0   4  -6  429.16   31.70
   0   4   6  427.96   24.20
   0   4   6  444.16   18.70
  -1   4   6  347.07   22.90
  -1   4   6  376.36   17.40
   1   4  -6  355.46   29.20
  -1  -4  -6  380.86   30.30
  -1   4  -6  370.06   28.50
   1  -4  -6  381.76   32.00
   1   4   6  385.56   20.60
   1   4   6  384.16   16.30
  -2   4   6  232.08   13.50
  -2  -4  -6  249.38   23.90
  -2   4   6  236.38   18.90
   2   4  -6  204.08   23.40
   2   4   6  237.28   11.30
  -2   4  -6  247.48   13.10
   2  -4  -6  190.18   24.60
  -2   4  -6  244.08   23.00
  -3   4   6  320.77   25.20
  -3   4   6  359.96   31.20
  -3  -4  -6  348.57   29.60
  -3   4   6  313.97   18.70
  -3   4  -6  338.27   17.90
   3   4   6  351.26   15.70
  -3   4  -6  353.56   27.80
  -4  -4  -6   12.80    6.80
  -4  -4   6   18.20   17.40
  -4   4  -6   -2.90    4.30
  -4   4  -6    0.00    2.70
  -5  -4  -6   -7.90    5.00
  -5   4   6   -1.30    3.10
  -5   4   6    0.50    1.50
  -5   4  -6    0.10    3.40
   5   4   6    0.20    0.80
  -5  -4   6   19.10   16.60
  -5  -4   6    0.80    0.50
  -6   4   6  324.07   28.90
  -6  -4  -6  300.47   28.80
  -6  -4  -6  279.77   11.90
  -6   4   6  317.97   16.10
  -6   4   6  303.17   12.40
  -6   4   6  287.17   13.40
  -6   4   6  318.17   13.30
  -6  -4   6  282.37   12.40
  -6  -4   6  314.17   13.90
  -6   4  -6  289.47   22.40
   6   4   6  318.97   15.90
  -6  -4   6  290.57   12.20
  -6  -4   6  289.77   12.60
  -6  -4   6  307.87   12.20
  -7   4   6   80.19    3.70
  -7   4   6   86.09    5.10
  -7   4   6   80.79    5.40
  -7  -4  -6   74.09    3.70
  -7   4   6   76.89    3.50
  -7  -4  -6   41.70   16.40
  -7   4   6   84.69   17.90
  -7   4   6   81.79    7.20
  -7  -4  -6   73.59    3.50
  -7   4   6   79.69    4.20
  -7  -4   6   78.19    4.00
  -7  -4   6   85.19    5.50
  -7  -4   6   64.79    8.90
  -7  -4   6   77.79    4.30
  -7  -4   6   75.29    4.10
   7   4   6   77.99    6.70
  -7  -4   6   53.59    9.80
  -7   4  -6   76.29    4.90
  -7  -4   6   78.39    4.40
  -8  -4  -6    5.90    0.90
  -8   4   6    8.40    2.70
  -8   4   6    0.70    7.30
  -8  -4  -6    6.70    1.10
  -8   4   6    6.00    0.90
  -8   4   6    4.00    1.40
  -8   4   6    7.30    1.10
  -8   4   6    7.50    2.10
  -8   4   6    5.50    1.20
   8   4   6    8.00    2.70
  -8  -4   6    5.70    1.60
  -8  -4   6    5.00    1.10
  -8  -4   6    6.00    1.30
  -8  -4   6    6.20    1.30
  -8  -4   6    7.10    1.40
  -9   4   6   46.70    2.50
  -9  -4  -6   41.00    2.30
  -9   4   6   49.20    3.10
  -9   4   6   29.60   17.80
  -9  -4  -6   44.90    2.60
  -9   4   6   46.40    4.40
  -9   4   6   48.20    5.90
  -9   4   6   45.80    3.70
  -9   4   6   47.40    2.30
  -9  -4   6   44.20    2.90
  -9  -4   6   42.60    3.10
  -9  -4   6   45.30    4.10
  -9  -4   6   42.20    2.90
  -9   4  -6   46.10    3.60
   9   4   6   41.40    8.70
  -9  -4   6   42.80    3.10
 -10   4   6   29.60    2.80
 -10   4   6   31.00    1.80
 -10   4   6   31.00    2.20
 -10   4   6   25.70    3.50
 -10   4   6   30.90    4.70
 -10  -4  -6   27.20    1.80
 -10  -4   6   27.70    2.30
 -10  -4   6   30.10    2.30
 -10  -4   6   29.20    2.10
 -10   4  -6   29.00    2.60
 -10  -4   6   26.20    2.20
 -11   4   6   43.60    2.10
 -11   4   6   34.40    4.40
 -11   4   6   40.80    3.70
 -11   4   6   41.30    3.00
 -11  -4  -6   39.30    2.10
 -11   4   6   42.30    2.50
 -11  -4   6   38.10    2.50
 -11  -4   6   42.50    2.40
 -11  -4   6   37.70    2.50
 -11  -4   6   38.90    2.50
 -12   4   6   -0.20    0.50
 -12   4   6    0.10    0.30
 -12   4   6   -0.50    1.00
 -12   4   6   -0.70    0.90
 -12  -4  -6    0.30    0.30
 -12  -4   6    0.20    0.40
 -12  -4   6    0.00    0.40
 -12  -4   6    0.30    0.50
   0   5   6    1.20    1.80
   0   5  -6    6.80    5.80
   0   5   6    0.60    0.80
   0  -5  -6   -0.40    8.10
  -1   5   6  125.49    7.90
  -1   5   6  128.39   13.00
   1   5  -6  101.29   14.80
  -1  -5  -6  123.69   17.50
   1  -5  -6  107.89   19.40
   1   5   6  127.99   10.90
   1   5   6  121.69    7.00
  -1   5  -6  121.09   16.00
  -2  -5  -6  598.54   42.50
  -2   5   6  576.94   26.90
  -2   5   6  561.64   34.70
   2   5  -6  515.45   45.90
  -2   5  -6  592.64   39.70
   2  -5  -6  514.15   41.40
   2   5   6  598.14   24.40
  -2   5  -6  597.94   27.70
  -3   5   6   21.40    4.20
  -3  -5  -6   14.30    9.20
   3   5  -6  -14.90   11.60
  -3   5   6   13.10    6.10
  -3   5  -6   12.80    3.90
  -3   5  -6    7.60    6.00
   3   5   6   13.60    2.30
  -4  -5  -6    9.20    8.30
  -4   5   6    1.40    3.90
  -4   5  -6    0.40    3.80
   4   5   6    1.30    1.50
  -4   5  -6    9.70    4.10
  -5   5   6  311.17   13.30
  -5   5   6  283.67   13.50
  -5   5   6  327.97   28.90
  -5  -5  -6  290.97   29.80
  -5   5   6  327.07   19.60
   5   5   6  316.27   15.90
  -5   5  -6  349.96   27.40
  -5  -5   6  284.77   12.30
  -6  -5  -6   85.89    4.00
  -6   5   6   85.19   16.30
   6   5  -6   82.69    3.60
  -6   5   6  104.49    5.50
  -6  -5  -6   87.49   20.30
  -6   5   6   95.59    7.80
  -6   5   6   87.09    5.60
  -6  -5   6   74.89    5.30
   6   5   6   88.39    7.20
  -6   5  -6   97.29    5.70
   6   5   6   84.69    3.80
  -6  -5   6   90.49    4.40
  -6  -5   6   90.99    4.40
  -6  -5   6   88.09    4.50
  -6  -5   6   37.60   23.00
  -6  -5   6  106.09   16.60
  -7   5   6    1.40    1.10
  -7  -5  -6    1.50    0.60
  -7  -5  -6   -5.20   15.80
  -7  -5  -6    1.00    0.40
   7   5  -6    0.90    0.40
  -7   5   6    2.70    2.10
  -7   5   6    3.20   11.40
  -7   5   6    0.70    0.70
  -7  -5   6    2.00    0.70
  -7  -5   6    4.20    6.60
  -7   5  -6    5.60    1.70
  -7  -5   6   -1.90   12.00
  -7  -5   6    2.10    1.10
  -7  -5   6    2.00    0.80
  -8   5   6   49.90    3.10
  -8   5   6   50.99    3.90
  -8  -5  -6   47.80    2.70
  -8   5   6   52.09    6.10
  -8   5   6   46.20    4.50
  -8   5   6   45.70    2.50
  -8  -5  -6   44.30    2.40
  -8   5   6   53.09   14.50
  -8  -5   6   44.50    2.90
   8   5   6   46.00    5.60
  -8   5  -6   46.20    3.80
  -8  -5   6   48.40    3.10
  -8  -5   6   47.10    3.10
  -8  -5   6   47.60    3.10
  -9  -5  -6   15.50    1.40
  -9   5   6   14.60    1.60
  -9   5   6   11.40    2.30
  -9   5   6    8.00    2.90
  -9   5   6   13.50    2.10
  -9   5   6   14.20    1.70
  -9  -5  -6   13.40    1.10
  -9   5   6   -9.40   12.20
  -9  -5   6   16.40    1.70
  -9  -5   6   14.40    1.70
  -9  -5   6   12.50    1.60
   9   5   6   14.30    7.10
  -9   5  -6   14.80    2.90
  -9  -5   6   12.60    1.70
 -10   5   6    7.70    2.60
 -10   5   6    6.30    1.00
 -10   5   6    4.70    1.20
 -10   5   6    7.40    2.00
 -10  -5  -6    5.40    0.80
 -10  -5   6    7.20    1.30
 -10  -5   6    7.40    1.20
 -10  -5   6    5.90    1.00
 -10  -5   6    7.70    1.30
 -10   5  -6    7.20    1.50
 -11   5   6   27.10    1.70
 -11   5   6   22.40    3.60
 -11   5   6   23.90    2.20
 -11   5   6   25.20    3.00
 -11  -5  -6   25.90    1.50
 -11  -5   6   24.90    1.90
 -11  -5   6   26.90    1.90
 -11  -5   6   23.90    1.80
 -12   5   6   28.40    2.90
 -12   5   6   30.60    1.90
 -12  -5  -6   27.20    1.30
 -12   5   6   29.10    2.50
 -12  -5   6   30.30    1.70
 -12  -5   6   27.90    1.50
 -12  -5   6   27.90    2.10
   0  -6  -6  125.89   19.80
   0   6   6  112.59    7.00
   0   6   6  110.29   11.80
   0   6  -6  108.09   15.60
   1   6  -6  309.67   29.30
  -1  -6  -6  300.87   30.30
  -1   6   6  326.47   23.40
  -1   6   6  317.67   15.60
  -1   6  -6  320.97   29.00
   1   6   6  311.07   20.40
   1   6   6  305.27   14.60
   1  -6  -6  279.17   31.10
  -2   6   6  144.39   16.30
   2   6  -6  157.28   22.30
  -2  -6  -6  125.09   19.20
  -2   6   6  135.79   10.10
  -2   6  -6  147.09   18.90
  -2   6  -6  140.89   11.40
   2   6   6  140.89    8.30
  -3  -6  -6  433.26   37.30
  -3   6   6  408.76   32.60
  -3   6   6  362.36   21.70
   3   6   6  403.96   19.30
  -3   6  -6  405.76   24.10
  -3   6  -6  424.26   34.60
  -4   6   6    3.70    2.20
  -4   6   6    4.60    4.40
  -4   6   6    5.20    1.60
  -4   6   6    3.90    1.20
  -4  -6  -6    9.80    8.80
   4   6   6    3.10    1.40
   4   6   6    3.60    0.50
  -4   6  -6    3.20    5.10
  -4   6  -6   10.70    6.30
  -5   6   6  220.68    9.70
  -5  -6  -6  223.18   27.20
  -5   6   6  200.28    9.90
  -5   6   6  244.48   26.30
  -5   6   6  217.48   12.70
   5   6   6  202.08   12.00
  -5  -6   6  180.88    8.60
  -5   6  -6  194.98    9.60
   5   6   6  200.18    7.80
  -5  -6   6  197.28    8.60
  -5   6  -6  230.78   23.60
  -6  -6  -6  229.88   28.50
  -6   6   6  233.28   11.20
   6   6  -6  225.08    8.90
  -6   6   6  196.38   26.30
  -6  -6  -6  227.38    9.50
  -6   6   6  254.27   14.40
  -6   6   6  234.68    9.80
  -6   6   6  260.07   11.00
  -6   6  -6  220.58   10.80
  -6  -6   6  229.28    9.80
  -6  -6   6  232.78    9.80
   6   6   6  244.58   13.80
  -6  -6   6  216.28    9.70
   6   6   6  231.58    8.90
  -6  -6   6  244.58   26.60
  -6  -6   6  229.88    9.80
  -7  -6  -6   48.20   15.00
  -7   6   6   50.09   13.70
  -7   6   6   46.40    2.90
  -7   6   6   52.09    3.80
  -7   6   6   42.60    4.20
  -7  -6  -6   42.70    3.10
  -7   6   6   46.80    6.10
   7   6   6   42.60    2.30
  -7  -6   6   58.79   14.40
   7   6   6   43.70    5.30
  -7  -6   6   46.20    3.30
  -7  -6   6    0.70   23.70
  -7  -6   6   46.70    3.00
  -7  -6   6   47.60    3.00
  -7  -6   6   45.30    3.00
  -8   6   6   11.80    2.00
  -8   6   6   10.20    3.50
  -8   6   6    9.40    1.40
  -8   6   6    7.10    2.00
   8   6  -6    6.90    0.70
  -8  -6  -6    9.20    0.90
  -8  -6  -6   30.40   10.60
  -8   6   6   17.40    9.50
  -8  -6  -6    6.20   12.90
   8   6  -6    4.90    3.80
  -8  -6  -6    7.70    1.10
  -8  -6   6    8.10    1.30
  -8   6  -6    4.60    1.60
  -8  -6   6   10.10    1.50
   8   6   6   16.90    3.90
  -8  -6   6   10.60    1.40
  -8  -6   6    8.70    1.20
  -9  -6  -6    4.80    0.80
  -9   6   6    3.40    0.70
  -9   6   6    3.80    1.20
  -9   6   6    3.80    2.10
  -9   6   6    1.80    2.20
  -9  -6   6    2.40    1.00
  -9  -6   6    2.90    0.80
  -9  -6   6    4.60    1.10
  -9   6  -6    1.30    1.30
  -9  -6   6    4.00    0.90
 -10   6   6   12.80    1.80
 -10   6   6   10.70    2.30
 -10  -6  -6   12.80    1.10
 -10   6   6   11.60    3.10
 -10   6   6   11.90    1.80
 -10  -6   6   12.10    1.40
 -10  -6   6   10.70    1.40
 -10  -6   6   11.80    1.50
 -11   6   6   42.30    2.60
 -11   6   6   35.40    4.60
 -11  -6  -6   39.30    1.90
 -11  -6   6   44.40    2.60
 -11  -6   6   38.70    2.10
 -11  -6   6   41.10    2.40
 -12   6   6    2.40    1.10
 -12   6   6    2.70    0.50
 -12   6   6    2.00    1.00
 -12  -6   6    2.90    0.60
 -12  -6   6    2.50    0.50
   0   7  -6    2.30    7.60
   0  -7  -6   -3.70   11.80
   0   7   6    0.00    2.10
   0   7   6   -0.20    0.90
   1   7  -6   71.59   17.40
  -1  -7  -6   41.60   16.00
  -1   7   6   50.59    5.10
   1   7   6   51.19    4.50
   1   7   6   50.09    8.00
  -1   7  -6   41.10    3.80
  -1   7  -6   43.30   13.40
   1  -7  -6   30.10   22.10
   2   7  -6   -5.80   11.90
  -2  -7  -6   12.20    0.70
  -2  -7  -6   28.60   13.20
  -2   7   6   11.70    3.80
  -2   7   6   18.30    6.70
   2   7  -6   12.40    0.80
   2   7   6   12.20    2.20
   2   7   6   14.60    0.80
  -2   7  -6   23.40    5.60
   2   7   6    7.80    3.50
  -2   7  -6   17.10    8.00
  -3   7   6   -0.60    3.30
  -3   7   6    1.90    1.10
  -3  -7  -6   15.70   11.10
  -3  -7  -6    1.60    0.30
   3   7  -6    1.50    0.30
  -3   7   6   -1.70    2.50
  -3   7  -6   10.00    4.50
   3  -7  -6    1.10    0.30
  -3   7  -6    7.00    6.00
  -4  -7  -6   -9.30   10.20
   4   7  -6    3.50    0.50
  -4   7   6    6.40    2.80
  -4   7   6    6.50    1.60
  -4   7   6   11.40    7.70
  -4  -7  -6    2.60    0.30
  -4   7   6    5.50    1.50
  -4   7  -6   -0.70    4.50
  -4   7  -6    6.20    1.50
  -4   7  -6    6.90    7.10
   4   7   6    2.60    1.40
   4  -7  -6    3.50    0.40
   4   7   6    3.90    0.50
   5   7  -6   40.80    1.90
  -5   7   6   32.50   12.90
  -5  -7  -6   25.30   15.70
  -5   7   6   38.10    3.70
  -5  -7  -6   32.80    2.80
  -5   7   6   44.80    5.50
  -5  -7   6   43.60    2.60
   5   7   6   42.10    1.80
  -5   7  -6   43.90    3.80
   5   7   6   45.30    4.90
   5  -7  -6   34.40    1.80
  -6   7   6   51.99    4.50
  -6   7   6   63.39   19.10
  -6   7   6   53.99    4.40
  -6  -7  -6   59.19   18.40
  -6  -7  -6   48.70    2.70
  -6   7   6   51.19    6.40
   6   7  -6   48.60    2.20
  -6  -7   6   51.09   16.30
   6   7   6   50.99    5.50
  -6  -7   6   47.80    3.00
  -6  -7   6   49.30    3.10
  -6   7  -6   52.99    4.20
  -6  -7   6   48.10    2.90
   7   7  -6    6.00    0.60
  -7  -7  -6   21.80   12.60
   7   7  -6    5.40    3.20
  -7   7   6    4.80    1.40
  -7   7   6    3.80    1.90
  -7  -7  -6    5.50    0.90
  -7   7   6  -10.70    7.90
  -7   7   6    2.90    2.80
  -7   7  -6    6.00    1.80
  -7  -7   6    4.80    1.00
  -7  -7   6    5.10    1.10
   7   7   6    5.30    0.60
  -7  -7   6   -5.50   10.30
   7   7   6    5.70    2.40
  -7  -7   6    5.10    1.00
  -8   7   6   39.50    4.00
  -8   7   6   38.00    5.60
  -8   7   6   41.70    3.30
  -8   7   6   14.60   14.70
  -8  -7  -6    7.30   16.50
  -8  -7  -6   11.30   13.50
   8   7  -6   40.50    1.80
   8   7  -6   33.50    7.00
  -8  -7  -6   40.60    2.30
  -8  -7   6   39.20    2.70
  -8  -7   6   37.90    2.60
  -8   7  -6   42.30    3.60
  -8  -7   6   37.40    2.40
  -9   7   6    4.10    2.60
  -9  -7  -6    3.70    0.70
  -9   7   6    4.40    1.70
   9   7  -6    3.40    0.50
  -9   7   6    4.10    1.20
  -9   7  -6    3.30    1.40
  -9  -7   6    3.90    1.00
  -9  -7   6    5.20    0.90
  -9  -7   6    5.30    1.20
 -10   7   6  100.69    5.70
 -10   7   6   93.69    7.40
 -10  -7  -6  101.39    4.30
 -10   7   6   94.89    6.00
 -10  -7   6   93.29    4.70
 -10  -7   6  102.69    4.40
 -10  -7   6   96.69    4.60
 -10   7  -6   97.69    5.20
 -11   7   6   23.80    2.70
 -11   7   6   21.10    2.90
 -11  -7  -6   24.00    1.20
 -11   7   6   26.60    1.90
 -11  -7   6   26.40    1.70
 -11  -7   6   25.60    1.30
 -11  -7   6   26.70    1.60
   0  -8  -6   13.20   17.20
   0   8   6   32.60    9.40
   0   8   6   25.90    3.40
   0   8  -6   25.70   11.70
   0   8  -6   21.20    1.20
   0   8  -6   15.30    3.10
   0  -8  -6   19.10    1.00
  -1   8   6   20.80    7.90
  -1  -8  -6   18.30   15.20
  -1   8   6   31.00    7.90
   1   8  -6   16.50   12.30
  -1  -8  -6   31.30    1.40
   1   8  -6   31.50    1.50
   1   8   6   32.70    3.90
   1   8   6   31.70    8.00
   1   8   6   30.60    1.50
  -1   8  -6   49.00   16.80
   1  -8  -6   30.70    1.40
   2   8  -6   69.09    2.90
  -2  -8  -6   71.09    2.90
  -2   8   6   64.79    7.90
   2   8  -6  106.19   26.30
  -2  -8  -6   91.99   24.40
  -2   8   6   70.99   13.40
  -2  -8   6   71.99    2.90
   2  -8  -6   68.59    2.90
  -2   8  -6   77.39   20.10
   2   8   6   69.29    5.70
  -2   8  -6   67.89    2.90
   2   8   6   68.69    2.90
   2   8   6   76.09   10.30
  -3  -8  -6    4.90    0.50
  -3   8   6    6.00    1.60
   3   8  -6    3.30    0.50
  -3   8   6    6.90    5.10
  -3   8   6    3.90    1.60
  -3   8   6    4.40    4.90
   3   8   6    5.30    1.90
  -3   8  -6    5.10    0.60
   3   8   6    4.10    0.50
  -3   8  -6    1.90    6.00
  -3   8  -6   12.40   10.60
   3  -8  -6    3.70    0.40
  -3  -8   6    4.60    0.50
  -4  -8  -6    0.70    0.20
  -4   8   6    1.60    1.10
  -4   8   6    0.00    1.40
   4   8  -6    0.60    0.30
  -4   8   6    1.90    2.30
  -4  -8  -6   -1.50   10.10
  -4   8   6    3.70    5.10
   4   8   6    0.60    0.30
  -4  -8   6    0.80    0.60
  -4   8  -6    4.70    7.80
  -4   8  -6   -0.70    1.30
   4  -8  -6    1.40    0.30
   4   8   6    0.90    1.30
  -5   8   6  139.39   22.90
  -5   8   6  159.48    7.50
  -5   8   6  143.89    9.70
  -5  -8  -6  145.09    6.60
  -5   8   6  141.59   10.60
   5   8   6  143.39    9.90
  -5   8  -6  151.18    8.00
   5  -8  -6  141.29    5.70
  -5  -8   6  161.38   32.70
  -6   8   6   50.49    3.60
   6   8  -6   37.30    8.00
  -6   8   6   45.60    4.40
  -6   8   6   47.20   17.80
  -6   8   6   38.70    5.90
   6   8  -6   44.50    2.10
  -6  -8  -6   46.70    2.50
  -6  -8   6   45.40    2.80
  -6  -8   6   42.30    3.00
  -6   8  -6   46.70    4.10
   6   8   6   45.60    2.10
   6   8   6   41.10    5.20
   6  -8  -6   45.20    2.00
  -7   8   6   82.79    5.80
  -7  -8  -6   81.29    3.80
  -7  -8  -6   59.19   19.60
  -7   8   6   76.89    7.60
   7   8  -6   95.29   11.80
   7   8  -6   82.19    3.40
  -7   8   6   85.79    5.00
  -7   8   6   93.19   21.90
   7   8   6   85.19    8.20
   7   8   6   82.39    3.40
  -7  -8   6   80.29    4.40
  -7  -8   6   76.39    3.90
  -7  -8   6   41.50   16.10
  -7  -8   6   84.09    4.30
  -7   8  -6   74.59    5.20
  -8   8   6   35.40    2.90
   8   8  -6   32.40    1.60
  -8   8   6   31.10    5.00
  -8   8   6   37.40    3.90
  -8  -8  -6   35.00    2.00
  -8  -8  -6   24.60   17.80
  -8  -8   6   31.90    2.50
  -8   8  -6   31.80    3.10
  -8  -8   6   36.00    2.50
  -8  -8   6   33.60    2.00
  -9   8   6  135.79    9.60
  -9   8   6  145.79    7.90
  -9  -8  -6  147.19    6.00
  -9   8   6  152.78    6.80
  -9   8  -6  140.19    7.30
  -9  -8   6  139.69    6.30
  -9  -8   6  133.29    6.40
  -9  -8   6  140.09    5.90
 -10   8   6    1.90    1.60
 -10   8   6    0.70    0.60
 -10  -8  -6    1.80    0.40
 -10   8   6    1.30    2.20
 -10  -8   6    2.50    0.70
 -10  -8   6    1.20    0.70
 -11   8   6    4.70    1.50
 -11   8   6    2.20    1.40
 -11  -8   6    4.30    0.60
 -11  -8   6    4.00    0.80
   0   9   6   -0.60    1.80
   0   9  -6   -0.40   11.60
   0  -9  -6   24.50   17.60
   0   9   6    0.30    0.20
   0   9  -6    0.70    0.30
   0  -9  -6    0.10    0.20
   0   9   6   10.50    7.50
  -1   9   6   82.89   13.60
   1   9  -6   51.69    6.20
   1   9  -6   29.60   19.40
   1   9  -6   64.39    2.70
  -1   9   6   45.90    6.80
  -1  -9  -6  102.49   25.00
  -1  -9  -6   63.79    2.70
   1   9   6   67.79    6.10
   1   9   6   66.59   19.60
  -1   9  -6   66.79    2.70
  -1   9  -6   70.29   21.90
   1   9   6   65.39    2.70
   1  -9  -6   63.19    2.70
  -1  -9   6   66.59    2.80
  -2   9   6   14.60    5.00
  -2   9   6   23.90   10.10
  -2  -9  -6   27.40    1.30
   2   9  -6   20.70    4.50
   2   9  -6   27.40    1.40
  -2  -9  -6   17.70   17.90
  -2   9  -6   16.10    6.80
  -2   9  -6   33.40   14.20
   2   9   6   27.10    1.30
   2   9   6   27.50    7.70
  -2   9  -6   25.20    1.30
  -2  -9   6   28.90    1.40
   2   9   6   30.40    4.00
   2  -9  -6   25.60    1.30
  -3   9   6  178.28    9.10
  -3  -9  -6  186.18   30.30
  -3  -9  -6  173.08    6.70
  -3   9   6  188.38    8.50
  -3   9   6  178.58   23.30
   3   9  -6  176.98   13.00
   3   9  -6  174.88    6.90
   3  -9  -6  172.08    6.80
   3   9   6  177.88    6.80
   3   9   6  172.98   16.60
   3   9   6  174.98   11.00
  -3  -9   6  174.68    6.80
  -3   9  -6  170.98   19.80
  -4   9   6  134.09   26.50
  -4   9   6  142.09    7.90
   4   9  -6  118.29   11.40
  -4  -9  -6  145.49   44.60
   4   9  -6  133.39    5.40
  -4   9   6  142.19   10.50
  -4   9   6  149.99    7.10
  -4  -9  -6  130.79    5.30
   4   9   6  138.39    9.60
  -4  -9   6  153.38    7.00
   4  -9  -6  135.49    5.70
  -4  -9   6  129.29    5.30
   4   9   6  137.39    5.40
  -4  -9   6  126.99   28.30
  -5   9   6   52.59    6.40
  -5   9   6   42.40   14.40
  -5  -9  -6   15.40   35.00
  -5   9   6   64.89    4.10
   5   9  -6   58.79    2.60
  -5   9   6   56.99    4.80
   5   9  -6   60.29    8.40
  -5  -9   6   56.29    3.20
   5   9   6   57.79    5.90
   5  -9  -6   56.49    2.50
   5   9   6   58.49    2.50
  -5   9  -6   55.29    4.60
  -6  -9  -6   29.40    2.00
  -6   9   6   33.20    5.30
  -6  -9  -6   24.80   20.90
  -6   9   6   33.00    3.70
  -6   9   6   23.40   16.30
   6   9  -6   37.10    9.20
  -6   9   6   32.60    2.80
   6   9  -6   34.80    1.70
  -6   9  -6   34.20    3.50
   6  -9  -6   33.50    1.50
  -6  -9   6    0.90   13.40
   6   9   6   35.40    1.70
   6   9   6   27.50    6.10
  -6  -9   6   33.50    2.50
  -6  -9   6   31.90    2.30
  -7   9   6   42.00    6.70
  -7  -9  -6   45.40    2.40
  -7   9   6   46.60    3.20
  -7  -9  -6   60.79   27.20
   7   9  -6   47.50    2.10
  -7   9  -6   46.20    3.90
  -7  -9   6   48.20    3.00
   7  -9  -6   45.30    2.00
  -8   9   6   22.60    2.10
  -8  -9  -6   23.10    1.50
   8  -9   6   23.70    1.20
   8   9  -6   23.20    1.20
  -8   9   6   21.80    4.00
  -8   9   6   20.90    3.10
  -8  -9   6   25.70    1.90
  -8   9  -6   21.30    2.70
  -8  -9   6   26.70    2.10
  -9   9   6   22.40    3.90
   9   9  -6   26.70    1.20
  -9   9   6   23.30    2.30
  -9   9   6   25.40    3.10
  -9  -9   6   26.20    2.20
  -9   9  -6   25.80    2.40
  -9  -9   6   28.10    2.10
 -10   9   6   48.00    4.30
 -10   9   6   56.49    3.80
 -10  -9   6   56.49    2.90
 -10  -9   6   54.59    2.80
   0  10   6   92.59   21.40
   0 -10  -6   83.69    3.50
   0 -10   6   84.69    3.60
   0  10   6   93.79    8.30
  -1 -10  -6   75.89   34.30
  -1  10   6  114.39   19.10
  -1 -10  -6  119.69    4.60
   1  10  -6  117.79    4.70
  -1  10   6   96.29   10.90
  -1  10  -6  111.49   14.50
   1  10   6  115.69    8.70
   1 -10  -6  115.29    4.60
   1  10   6  119.79    4.60
  -1 -10   6  121.29    4.70
   1  10   6  114.49   16.70
  -2  10   6   -0.30    1.40
   2  10  -6    6.10    3.90
  -2 -10  -6  -25.60   22.20
  -2  10   6    2.40    1.40
  -2  10   6   -4.10    5.00
   2  10   6    4.50    4.50
  -2  10  -6    1.40    6.00
   2  10   6    0.00    1.90
  -2 -10   6   -9.20   16.20
  -2 -10   6    1.10    0.30
  -3  10   6   90.99    5.60
  -3  10   6   85.89    5.90
  -3 -10  -6   66.09   24.30
   3  10  -6   90.29    3.70
  -3  10   6  104.89   22.10
  -3 -10  -6   86.89    3.50
   3  10  -6   84.29    8.70
  -3 -10   6   83.69    4.10
   3  10   6   89.19    7.50
   3  10   6   84.19   13.00
  -3 -10   6   66.99   25.40
   3 -10  -6   87.49    3.60
  -3  10  -6   56.99   16.00
  -3 -10   6   88.99    3.60
   3  10   6   89.69    3.60
  -4 -10  -6   34.70   22.30
  -4  10   6   10.60    2.50
  -4  10   6    3.30    2.90
  -4 -10  -6    6.90    0.50
   4  10  -6   14.80    4.60
   4  10  -6    7.90    0.70
  -4  10  -6    8.60    2.20
  -4 -10   6  -14.70   15.70
   4 -10  -6    7.40    0.70
  -4 -10   6    6.70    0.60
   4  10   6    7.40    0.70
   4  10   6    9.10    2.40
   4  10   6   21.00    7.70
  -4 -10   6    6.70    1.00
  -5  10   6  101.19    8.70
  -5  10   6   70.59   18.60
  -5  10   6  106.49    6.70
  -5 -10  -6   84.19   23.80
   5  10  -6   99.09   10.40
   5  10  -6  104.79    4.30
  -5 -10   6  126.99   29.00
   5  10   6  107.19    4.20
  -5 -10   6  103.69    4.90
   5  10   6  108.29   16.90
  -5 -10   6  108.39    5.20
  -5  10  -6  108.09    6.50
   5  10   6   93.79    8.20
   5 -10  -6  106.79    4.20
  -6  10   6  160.48   11.20
   6  10  -6  188.28    7.00
  -6 -10  -6   89.19   41.20
   6 -10   6  158.98    6.50
  -6  10  -6  159.38    8.50
   6 -10  -6  160.48    6.40
  -6 -10   6  160.78    7.20
  -6 -10   6  191.08   39.10
   6  10   6  174.98    7.00
  -7  10   6    0.10    1.70
   7  10  -6    0.30    0.30
  -7  10   6   -0.90    1.10
   7 -10  -6    0.20    0.20
  -7 -10   6    1.50    0.70
  -7 -10   6    0.40    0.60
  -7  10  -6   -0.60    1.10
  -8  10   6    0.10    1.50
   8  10  -6    0.90    0.30
   8 -10   6   -0.50    0.20
  -8  10   6    0.90    1.30
  -8 -10   6    0.00    0.50
  -8 -10   6    0.20    0.60
  -8  10  -6    1.80    1.20
   9  10  -6   19.10    1.00
  -9  10   6   19.20    3.10
  -9  10   6   19.80    2.60
  -9  10  -6   21.40    2.10
  -9 -10   6   19.90    1.70
  -9 -10   6   19.70    1.60
 -10  10   6   32.30    2.50
 -10  10   6   28.40    3.00
 -10 -10   6   32.30    1.80
   0  11  -6    0.00    0.30
   0  11  -6    5.00    4.90
   0  11   6   -7.30    5.60
   0 -11  -6    0.30    0.30
   0 -11   6    0.30    0.30
   0  11   6    7.30    6.30
   1 -11   6    1.50    0.40
  -1  11   6    0.70    8.00
   1  11  -6    1.70    0.40
  -1 -11  -6    1.40    0.30
  -1 -11   6   19.70   49.70
   1  11   6    5.40    7.30
  -1  11  -6   -4.80    6.50
   1  11   6   -4.30    3.60
  -1 -11   6    1.70    0.40
  -1  11  -6    1.90    0.40
   1 -11  -6    1.60    0.40
   2 -11   6   31.80    1.70
   2  11  -6   34.40    1.60
  -2 -11  -6   87.19   37.30
  -2  11   6   20.40   14.50
  -2 -11  -6   33.40    1.50
  -2  11   6   30.40    3.50
  -2  11  -6   32.00    1.50
  -2  11  -6   24.50   13.10
  -2 -11   6   45.90   22.20
  -2 -11   6   30.90    1.60
   2 -11  -6   32.30    1.60
   2  11   6   25.40   11.60
   2  11   6   33.40    1.60
  -3  11   6  198.78   12.80
   3 -11   6  197.18    7.60
  -3 -11  -6  205.38   45.80
   3  11  -6  198.38    7.60
  -3  11   6  196.18   10.00
  -3 -11  -6  198.18    7.40
   3 -11  -6  193.98    7.50
  -3 -11   6  183.88    8.00
   3  11   6  179.98   34.20
  -3 -11   6  197.18    7.50
   3  11   6  189.48    7.50
  -3 -11   6  225.48   35.00
   4 -11   6  122.29    4.90
  -4  11   6  108.99    9.20
  -4  11   6  120.29   29.90
  -4 -11  -6  111.79    4.70
   4  11  -6  119.89    4.80
  -4  11   6  123.39    7.30
  -4 -11  -6  157.18   41.60
   4  11   6  129.99   12.10
  -4  11  -6  127.29    7.10
  -4 -11   6  192.18   37.10
  -4 -11   6  115.09    5.70
   4 -11  -6  119.39    4.70
   4  11   6  119.49    4.80
  -5 -11  -6  183.28   36.60
  -5  11   6  198.58   13.30
   5 -11   6  225.48    8.60
  -5  11   6  238.78   11.20
   5  11  -6  225.38    8.60
   5  11   6  218.78    8.60
  -5 -11   6  233.38    9.60
   5 -11  -6  233.18    8.50
  -5  11  -6  222.98   10.80
  -5 -11   6  214.48   35.30
  -5 -11   6  224.98    9.20
   6  11  -6   14.40    0.90
  -6  11   6   14.90    2.60
  -6  11   6    9.40    2.80
   6 -11   6   12.80    0.90
  -6 -11   6   15.00    1.30
  -6  11  -6   14.80    2.40
   6 -11  -6   13.10    0.80
  -6 -11   6   15.50    1.60
  -7  11   6   25.80    3.10
  -7  11   6   19.40    3.60
   7  11  -6   22.00    1.10
   7 -11  -6   21.40    1.00
  -7 -11   6   20.20    1.80
  -7 -11   6   22.10    1.50
   8  11  -6    2.00    0.30
  -8  11   6    3.60    1.50
  -8  11   6    0.80    1.50
  -8 -11   6    2.20    0.90
  -8 -11   6    1.00    0.50
  -8  11  -6   -1.60    1.00
   9  11  -6    5.00    0.40
  -9  11   6    3.60    1.50
  -9 -11   6    4.90    0.80
   0  12   6  -15.50    9.10
  -1  12   6  -10.10   16.70
  -2  12  -6    0.40    0.20
  -2 -12   6  -10.90   41.00
  -4  12   6   57.79    6.30
   4  12  -6   71.49    3.00
   4 -12   6   69.99    3.00
  -4  12   6   78.09    5.30
  -4  12  -6   70.39    5.00
  -4 -12   6   71.99    3.40
   4 -12  -6   71.29    2.90
  -5  12   6   30.50    4.60
  -5  12   6   34.20    3.60
   5  12  -6   34.00    1.60
   5 -12   6   35.00    1.60
   5 -12  -6   36.40    1.60
  -5 -12   6   31.70    2.30
  -5  12  -6   30.00    3.10
  -5 -12   6   36.60    2.40
  -6  12   6   36.50    4.50
  -6  12   6   46.90    3.90
   6  12  -6   48.30    2.10
   6 -12   6   47.50    2.10
  -6 -12   6   50.49    2.80
  -6  12  -6   51.79    4.90
  -7  12   6    1.00    1.40
   7 -12   6    1.90    0.30
  -7  12   6    2.80    1.30
   7  12  -6    1.90    0.30
   7 -12  -6    2.30    0.30
  -7 -12   6    1.60    0.70
  -7  12  -6    2.90    1.20
   8  12  -6    0.30    0.20
  -8  12   6    0.00    1.10
  -8  12   6   -0.70    1.50
  -8 -12   6   -0.40    0.40
   0 -13  -6    0.10    0.30
   0 -13   6    0.20    0.30
   0  13  -6   -0.20    0.20
   1 -13   6  101.69    4.10
   1  13  -6  102.79    4.10
  -1 -13  -6  102.59    4.00
  -1  13   6  105.99    6.20
   1 -13  -6  101.79    4.10
  -1  13  -6   99.69    4.00
  -1 -13   6  101.89    4.10
  -2  13   6   10.60    2.30
   2  13  -6   10.50    0.80
   2 -13   6   10.60    0.80
  -2 -13  -6   10.70    0.70
  -2  13   6    8.10    3.20
   2 -13  -6   12.10    0.80
  -2 -13   6   11.20    0.70
   3 -13   6   24.50    1.30
  -3 -13  -6   24.00    1.10
  -3  13   6   24.00    3.10
   3  13  -6   25.00    1.30
  -3  13   6   20.10    4.00
  -3 -13   6   24.20    1.20
   3 -13  -6   24.60    1.20
  -3  13  -6   22.00    2.90
   4 -13   6    2.60    0.40
  -4  13   6    1.50    1.30
   4  13  -6    2.40    0.40
  -4  13   6    2.30    2.00
  -4  13  -6    1.40    1.20
   4 -13  -6    2.10    0.30
  -4 -13   6    3.50    0.90
   5  13  -6    9.40    0.70
   5 -13   6   10.20    0.70
  -5  13   6   11.00    2.00
  -5 -13   6   10.30    1.20
   5 -13  -6   11.30    0.80
  -5  13  -6    9.00    1.70
   6  13  -6    3.30    0.40
   6 -13   6    3.30    0.40
  -6  13   6    3.40    1.20
  -6  13   6    0.60    1.30
  -6  13  -6    4.20    1.10
   6 -13  -6    2.60    0.30
  -6 -13   6    2.70    0.70
   7 -13   6   17.10    0.80
   7  13  -6   16.80    0.80
  -7  13   6   17.50    2.00
  -7  13   6   12.60    2.10
   7 -13  -6   14.70    0.70
  -7 -13   6   16.80    1.80
   0  14   6   31.00    2.90
   0 -14   6   28.50    1.40
   0 -14  -6   28.00    1.30
   0  14  -6   28.20    1.30
   1  14  -6   76.89    3.00
  -1  14   6   63.99    6.00
   1 -14   6   75.99    3.10
  -1  14   6   80.39    4.90
  -1 -14  -6   75.79    3.00
   1  14   6   76.59    5.90
  -1 -14   6   75.79    3.00
   1 -14  -6   77.19    3.00
  -2 -14  -6   19.40    1.10
  -2  14   6   19.40    2.90
   2 -14   6   17.10    1.00
  -2  14   6   13.80    3.20
   2  14  -6   16.80    0.90
  -2  14  -6   23.10    3.80
  -2 -14   6   17.50    0.80
   2 -14  -6   18.40    0.90
   3 -14   6    5.40    0.50
   3  14  -6    5.10    0.50
  -3  14   6    1.50    1.70
  -3  14   6    6.70    1.60
  -3  14  -6    5.40    1.50
   3 -14  -6    4.80    0.50
  -3 -14   6    5.30    0.90
   4  14  -6   22.70    1.10
   4 -14   6   22.30    1.10
  -4  14   6   16.70    2.80
  -4  14   6   25.30    2.60
  -4 -14   6   23.30    1.60
  -4  14  -6   21.30    2.20
   4 -14  -6   24.10    1.10
   5  14  -6   20.50    1.00
   5 -14   6   21.10    1.00
  -5  14   6   21.30    2.50
  -5  14   6   16.10    2.50
  -5 -14   6   23.20    1.50
  -5  14  -6   18.90    2.10
   5 -14  -6   22.60    1.20
   6  14  -6    8.00    0.50
   6 -14   6    8.20    0.50
  -6  14   6    9.40    1.70
   6 -14  -6    7.30    0.40
  -6 -14   6    7.80    0.80
   0  15   6   -0.80    1.30
   0 -15   6    0.10    0.20
   0  15  -6    0.40    0.90
   0  15   6    0.60    1.30
   0 -15  -6    0.00    0.20
   1 -15   6   10.60    0.60
   1  15  -6    9.00    0.50
  -1 -15  -6   11.70    0.60
   1 -15  -6   11.10    0.60
  -1  15  -6   11.80    1.80
  -1 -15   6   10.40    0.60
   1  15   6   12.10    1.60
  -2  15   6   26.90    2.40
  -2  15   6   19.60    2.70
   2 -15   6   26.40    1.10
  -2 -15  -6   24.50    1.00
   2  15  -6   24.20    1.10
  -2 -15   6   24.80    1.50
  -2  15  -6   25.50    2.30
   2 -15  -6   25.50    1.10
   2  15   6   19.30    2.00
  -3  15   6    8.50    1.40
   3 -15   6   10.90    0.60
   3  15  -6   10.10    0.60
  -3 -15   6   10.30    1.30
   3  15   6   11.20    1.70
  -3  15  -6   10.30    1.80
   3 -15  -6   10.90    0.60
   4 -15   6    1.30    0.20
  -4  15   6    2.70    0.80
  -4  15   6    0.70    0.90
   4  15  -6    1.10    0.20
  -4  15  -6    3.20    0.90
   4 -15  -6    1.30    0.20
  -4 -15   6    2.00    0.50
   0  16  -6   62.89    3.20
   0 -16   6   61.49    2.70
   0 -16  -6   64.19    2.40
   1 -16   6   14.50    0.60
   1  16  -6   14.40    1.50
  -1  16  -6   12.00    1.70
   0   0   7    0.60    1.40
   0   0  -7    2.10    4.00
   0   0   7   -0.60    1.00
   1   0  -7   11.40    6.50
  -1   0   7    1.60    1.60
  -1   0  -7   12.90    5.60
  -2   0  -7    3.90    3.80
  -2   0   7    0.80    1.90
   2   0   7    0.00    0.60
  -3   0   7    3.50    2.20
  -3   0   7   24.20   11.00
  -3   0  -7   -4.20    3.60
  -4   0   7  -11.20    7.90
  -4   0  -7   -1.30    3.80
  -4   0   7    1.20    2.20
   4   0   7    0.20    0.70
   5   0   7   -0.40    0.80
  -5   0   7   -5.90    7.20
  -5   0   7   -2.00    3.10
  -6   0   7    0.20    0.60
  -6   0   7   -4.10    2.70
  -6   0   7   -1.30    3.20
  -6   0   7    0.50    0.60
  -6   0  -7    0.20    0.30
  -6   0   7    1.50    0.90
  -6   0  -7    8.60    5.40
  -6   0   7    0.00    1.30
   6   0   7    0.00    1.10
  -7   0   7    1.20    1.40
  -7   0  -7    0.20    0.40
  -7   0   7   -0.60    0.60
   7   0   7   -1.50    1.80
  -7   0   7    7.00    6.10
  -7   0   7   -0.20    1.10
  -7   0   7    0.00    0.50
  -7   0  -7    0.20    3.60
  -7   0   7    0.20    0.80
  -7   0  -7   -0.40    0.30
  -7   0   7    0.80    0.80
  -8   0   7    1.10    1.00
  -8   0   7   -1.30    4.40
  -8   0  -7    1.30    0.80
  -8   0   7   -0.30    1.40
  -8   0   7   -0.80    0.60
  -8   0   7    0.30    0.80
  -8   0   7   -0.20    1.00
  -8   0   7   -1.00    1.60
  -9   0   7   -0.10    1.70
  -9   0  -7    0.60    0.50
  -9   0   7   -0.70    1.00
  -9   0   7   -0.30    0.60
  -9   0   7    0.60    0.60
  -9   0   7   -0.60    0.70
  -9   0   7    0.10    1.60
 -10   0   7   -0.90    0.40
 -10   0   7    0.40    1.80
 -10   0   7   -0.10    1.10
 -10   0  -7   -0.10    0.50
 -10   0   7    0.10    0.70
 -11   0   7    0.10    0.50
 -11   0   7    0.90    1.40
 -11   0   7    0.50    0.70
 -11   0  -7    0.60    0.50
 -11   0   7    0.40    0.80
 -11   0   7   -0.10    1.20
 -11   0   7   -0.20    0.50
 -12   0   7   -0.10    0.60
 -12   0   7    0.30    0.90
 -12   0   7    0.10    0.40
 -12   0   7   -0.10    0.50
 -12   0   7    0.20    0.50
 -13   0   7   -0.40    0.40
 -13   0   7    0.10    0.50
 -13   0   7   -0.10    0.20
   0   1  -7   -1.40    3.10
   0  -1   7    0.70    1.10
   0   1   7   -0.30    1.60
   0   1   7    1.20    1.10
  -1   1   7   41.20    4.50
   1   1  -7   36.30   10.10
   1  -1   7   30.90    3.80
  -1   1   7   31.40    5.20
  -1  -1  -7   47.20   11.60
   1  -1  -7   42.60   10.70
  -1  -1   7   36.80    4.50
   1   1   7   36.60    3.40
  -1   1  -7   41.60   10.30
   1   1   7   27.40    3.70
  -2   1   7  175.88   12.30
   2  -1   7  196.08   10.30
  -2   1   7  206.98   15.50
  -2  -1  -7  226.78   21.10
   2   1  -7  161.68   19.30
  -2  -1   7  195.78   13.00
  -2   1  -7  198.98   19.40
   2  -1  -7  154.68   20.10
   2   1   7  207.08    9.70
   3  -1   7    2.20    2.20
  -3  -1  -7   -1.00    4.00
  -3   1   7   12.10    8.60
   3   1   7    2.20    0.90
  -3   1  -7    2.00    3.60
  -4   1   7  422.26   27.40
   4  -1   7  406.86   18.00
  -4  -1  -7  403.96   31.60
  -4   1   7  421.46   29.70
   4   1   7  427.56   18.00
  -4  -1   7  393.46   24.50
  -4   1  -7  426.16   30.60
  -5  -1  -7  346.07   28.30
   5  -1   7  342.67   15.80
  -5   1   7  345.57   25.30
  -5   1   7  369.06   26.20
   5   1   7  361.46   16.10
  -5   1  -7  356.16   27.10
  -5  -1   7  364.26   23.70
  -6   1   7  116.89    6.50
   6  -1   7  114.59    7.20
  -6   1   7  124.29    5.70
  -6   1   7  115.59    5.90
  -6   1   7  134.69    8.30
  -6   1   7  137.09    8.20
  -6  -1  -7  107.39   15.20
  -6   1   7  138.59   16.20
  -6  -1  -7  124.09    5.20
  -6   1  -7  124.29    5.20
  -6  -1   7  122.59    7.80
  -6   1  -7  130.39   14.30
   6   1   7  122.59    7.50
  -6  -1   7  119.59    6.30
  -6  -1   7  126.49    6.40
  -6  -1   7  125.29   13.60
  -6  -1   7  130.59    5.70
  -6  -1   7  107.19   11.60
  -7  -1  -7    8.20    1.00
  -7   1   7    9.00    1.10
  -7  -1  -7    5.80    7.30
  -7   1   7   12.50    3.30
  -7   1   7    7.90    1.60
  -7   1   7    8.30    2.00
  -7  -1  -7    8.70    1.00
  -7   1   7   11.40    1.70
  -7   1   7    4.80    6.50
  -7   1   7   10.20    1.40
  -7  -1   7   10.90    1.50
  -7  -1   7   10.00    1.80
  -7  -1   7    9.70    1.30
  -7  -1   7   10.30    1.60
  -7  -1   7    8.10    5.80
   7   1   7    6.70    1.90
  -7  -1   7   11.50    2.00
  -7   1  -7    8.90    1.00
  -7  -1   7    8.80    2.30
  -8   1   7   44.80    5.20
  -8  -1  -7   47.50    2.80
  -8   1   7   45.00    3.30
  -8   1   7   49.50    4.20
  -8   1   7   49.30   11.20
  -8  -1  -7   44.90    3.50
  -8   1   7   47.10    2.70
  -8   1   7   47.50    3.80
  -8   1  -7   43.70    2.90
  -8  -1   7   48.00    4.00
  -8  -1   7   47.10    5.00
  -8  -1   7   47.30    3.00
  -8  -1   7   46.60    3.40
  -8  -1   7   48.90    3.70
  -8  -1   7   49.30    3.40
  -9   1   7    4.80    1.20
  -9  -1  -7    8.10    1.00
  -9   1   7    6.80    2.60
  -9   1   7    7.10    1.80
  -9   1   7    5.60    0.90
  -9   1   7    7.50    1.20
  -9   1   7    7.90    7.40
  -9   1   7    4.60    1.90
  -9  -1   7    9.50    1.30
  -9   1  -7    5.40    0.80
  -9  -1   7    5.80    1.30
  -9  -1   7    5.10    2.00
  -9  -1   7    5.00    1.00
  -9  -1   7    4.10    1.80
  -9  -1   7    7.00    1.60
 -10   1   7  192.08    8.90
 -10   1   7  197.58   10.10
 -10   1   7  196.38    7.90
 -10   1   7  178.48    9.90
 -10  -1  -7  192.88    7.90
 -10   1   7  196.38   11.70
 -10   1   7  190.78    8.20
 -10   1  -7  193.38    7.80
 -10  -1   7  192.18    8.10
 -10  -1   7  193.78    9.70
 -10  -1   7  182.38    9.20
 -10  -1   7  191.78   10.90
 -10  -1   7  192.78    8.50
 -10  -1   7  210.18    9.80
 -11   1   7    0.40    0.50
 -11   1   7    1.40    0.50
 -11   1   7   -0.10    1.30
 -11  -1  -7    0.50    0.40
 -11   1   7   -0.10    1.20
 -11   1   7    1.30    1.00
 -11   1   7    0.40    0.70
 -11  -1   7    0.00    0.70
 -11  -1   7    0.80    0.70
 -11  -1   7   -0.10    1.20
 -11  -1   7    1.00    0.80
 -11  -1   7    0.60    0.60
 -12   1   7   24.10    2.10
 -12   1   7   24.20    1.80
 -12   1   7   26.60    1.50
 -12   1   7   21.50    2.70
 -12  -1   7   25.20    2.00
 -12  -1   7   25.70    1.50
 -12  -1   7   24.50    1.80
 -12  -1   7   25.50    1.70
 -13   1   7   48.20    2.20
 -13   1   7   44.90    2.50
 -13  -1   7   44.40    2.10
 -13  -1   7   52.39    2.40
   0   2  -7  500.55   34.10
   0  -2  -7  531.55   36.50
   0   2   7  486.85   26.20
   0   2   7  497.35   22.00
  -1   2   7  172.18   10.60
  -1   2   7  153.98   13.30
   1  -2   7  152.28    9.90
   1   2  -7  181.78   18.90
  -1  -2  -7  193.28   20.00
   1  -2  -7  177.48   20.30
   1   2   7  173.08    8.80
  -1   2  -7  168.18   17.60
   1   2   7  164.48   11.30
  -2  -2  -7   -0.70    4.70
  -2   2   7   -1.70    2.30
  -2   2   7    1.90    1.40
   2  -2   7   -0.80    0.90
   2   2   7   -0.20    0.60
   2  -2  -7  -13.60    8.30
  -2  -2   7    2.00    2.00
   2   2   7    0.40    1.60
  -2   2  -7   -2.70    3.20
  -3   2   7  339.27   23.70
  -3  -2  -7  340.77   28.40
  -3   2   7  315.97   27.10
   3  -2   7  302.77   15.10
   3   2   7  308.97   14.90
  -3   2  -7  342.37   26.30
  -3  -2   7  269.17   30.20
  -3  -2   7  320.47   18.70
   3   2   7  327.07   14.40
  -4  -2  -7   -2.00    5.60
  -4   2   7    6.00    4.00
   4  -2   7    3.10    1.70
   4   2   7    5.20    1.50
  -4  -2   7   -1.90   11.10
  -4  -2   7    1.40    2.20
  -4   2  -7    5.10    5.70
  -5  -2  -7   22.10   10.30
  -5   2   7   44.20   16.10
  -5   2   7    8.30    8.70
   5  -2   7   19.80    3.30
   5   2   7   26.10    2.90
  -5  -2   7   15.10   10.70
  -5  -2   7   28.10    7.20
  -6   2   7   32.10    5.50
  -6   2   7   40.30    3.30
  -6   2   7   35.80   10.40
  -6   2   7   32.90    3.00
  -6  -2  -7   34.10    1.90
  -6   2   7   37.70    3.00
  -6  -2   7   34.20    2.30
  -6  -2   7   35.00   10.20
  -6   2  -7   36.90    1.90
  -6  -2   7   36.20    3.00
  -6   2  -7   33.90    8.50
  -6  -2   7   34.40    3.50
  -6  -2   7   30.90    2.30
  -6  -2   7   33.10    2.60
   6   2   7   34.60    3.60
  -6  -2   7   35.30    2.70
  -7   2   7  155.98    8.40
  -7  -2  -7  122.09   15.70
  -7   2   7  165.48    6.90
  -7   2   7  172.68    8.40
  -7   2   7  165.18    7.60
  -7  -2  -7  159.48    6.70
  -7   2   7  155.98   18.60
  -7  -2  -7  163.18    6.90
  -7   2   7  165.18    7.10
  -7   2   7  169.98   10.50
  -7  -2   7  168.38    7.90
  -7   2  -7  161.28    6.70
  -7  -2   7  166.18    8.00
  -7  -2   7  167.88    7.20
  -7  -2   7  164.98    7.60
  -7  -2   7  159.28    7.30
   7   2   7  159.98    9.90
  -7  -2   7  168.58    9.50
  -8  -2  -7   26.90    1.70
  -8  -2  -7   23.60    2.10
  -8   2   7   26.70    3.30
  -8   2   7   27.20    1.80
  -8   2   7   29.60    2.50
  -8   2   7   26.10    2.80
  -8   2   7   18.00    7.60
  -8   2   7   23.50    2.40
  -8   2   7   27.00    4.50
  -8  -2   7   30.30    3.20
  -8  -2   7   29.30    2.70
  -8  -2   7   29.60    2.10
  -8  -2   7   29.00    2.30
  -8   2  -7   27.60    1.80
  -8  -2   7   28.80    3.80
   8   2   7   25.60    4.40
  -8  -2   7   26.00    2.50
  -9   2   7  155.58   10.50
  -9   2   7  159.68    6.60
  -9   2   7  159.28    6.90
  -9  -2  -7  152.68    6.60
  -9   2   7  158.88    8.30
  -9   2   7  127.59   18.30
  -9   2   7  159.68    7.50
  -9   2   7  160.58    8.50
  -9  -2   7  157.68    7.80
  -9  -2   7  159.08    7.80
  -9   2  -7  157.08    6.50
  -9  -2   7  154.58    6.90
  -9  -2   7  151.78    7.50
  -9  -2   7  154.68    7.20
  -9  -2   7  161.78    9.40
 -10   2   7   34.00    4.70
 -10  -2  -7   33.00    2.00
 -10   2   7   31.10    2.20
 -10   2   7   33.90    2.70
 -10   2   7   35.30    2.00
 -10   2   7   35.80    3.70
 -10   2   7   35.40    3.20
 -10  -2   7   33.40    2.90
 -10  -2   7   31.80    3.80
 -10  -2   7   34.90    2.80
 -10  -2   7   33.50    2.20
 -10  -2   7   34.80    2.50
 -11   2   7    0.40    1.50
 -11   2   7    1.10    0.70
 -11  -2  -7    0.00    0.40
 -11   2   7    0.20    0.50
 -11   2   7    0.20    1.30
 -11   2   7   -0.20    0.70
 -11   2   7    0.40    0.70
 -11  -2   7    0.30    0.60
 -11  -2   7    0.30    1.10
 -11  -2   7    0.50    0.50
 -11  -2   7    0.70    0.90
 -11  -2   7    1.90    0.70
 -12   2   7    3.50    0.70
 -12   2   7    2.60    1.30
 -12   2   7    2.80    0.80
 -12  -2   7    2.10    0.70
 -12  -2   7    2.90    0.70
 -12  -2   7    2.90    0.80
 -12  -2   7    2.60    0.60
   0   3   7   -1.50    1.90
   0   3  -7    0.50    6.10
   0  -3  -7   13.60    7.10
   0   3   7   -0.60    0.80
  -1   3   7   55.39    5.40
   1   3  -7   54.19   10.10
  -1  -3  -7   56.49   11.40
  -1   3   7   54.39    8.20
  -1   3  -7   68.19   11.80
   1   3   7   56.59    6.90
   1  -3  -7   56.09   13.80
   1   3   7   61.49    4.40
  -2  -3  -7  366.86   30.40
  -2   3   7  326.47   18.60
   2   3  -7  334.27   28.50
  -2   3   7  321.17   23.60
   2   3   7  348.67   15.50
   2   3   7  356.86   18.50
   2  -3  -7  411.46   50.49
   3   3  -7   29.20   12.80
  -3   3   7   35.60   15.20
  -3   3   7   39.50    5.90
  -3  -3  -7   57.19   14.60
  -3   3   7   45.60    8.70
   3   3   7   46.60    3.80
   3   3   7   40.70    4.50
  -3   3  -7   39.20   10.60
  -4   3   7  151.18   17.10
  -4  -3  -7  169.18   20.50
  -4   3   7  138.19   21.00
   4   3   7  160.18    8.90
  -4   3  -7  155.48   17.90
  -4  -3   7  204.38   31.40
  -5   3   7   77.49   12.70
  -5  -3  -7   72.69   13.80
  -5   3   7   77.79    4.40
  -5   3   7   61.69    7.00
   5   3   7   66.19    5.90
  -5  -3   7   57.09    3.30
  -5   3  -7   68.99   11.50
  -5  -3   7   38.30   18.90
  -6   3   7  110.69    6.00
  -6   3   7  119.69    8.20
  -6  -3  -7  113.89   16.90
  -6   3   7  105.99    6.20
  -6  -3  -7   96.29    4.50
  -6   3   7  117.69   16.10
  -6   3   7  103.19    5.50
  -6   3  -7  100.29   13.20
  -6  -3   7  107.19    6.70
  -6   3  -7  109.39    4.50
   6   3   7  116.79    7.70
  -6  -3   7  111.19    5.70
  -6  -3   7  112.59    5.50
  -6  -3   7  102.49    5.00
  -6  -3   7  100.39    5.20
  -7   3   7  100.29    5.00
  -7   3   7   96.89    6.00
  -7   3   7   99.69    5.80
  -7   3   7   91.59    4.40
  -7   3   7   74.89   14.10
  -7  -3  -7   94.39    4.40
  -7   3   7   97.79    7.90
  -7   3   7   95.69    4.30
  -7  -3  -7   82.09   14.10
  -7  -3  -7   92.79    4.20
  -7  -3   7   94.69    5.10
  -7  -3   7   92.79    5.20
  -7   3  -7   97.59    4.20
  -7  -3   7   91.29    4.70
  -7  -3   7   98.39    4.70
  -7  -3   7   96.89    6.40
  -8   3   7  482.35   18.00
  -8   3   7  480.65   22.80
  -8   3   7  454.35   19.80
  -8  -3  -7  451.45   17.60
  -8  -3  -7  469.65   17.90
  -8   3   7  485.15   19.70
  -8   3   7  408.06   35.10
  -8   3   7  461.95   18.60
  -8  -3   7  478.65   20.70
   8   3   7  425.66   21.90
  -8  -3   7  467.95   18.20
  -8  -3   7  447.66   18.30
  -8  -3   7  468.25   19.00
  -8  -3   7  445.56   18.60
  -9  -3  -7    0.80    0.50
  -9   3   7   -1.90    9.30
  -9   3   7   -1.40    1.20
  -9   3   7   -0.10    0.70
  -9   3   7    0.10    1.90
  -9   3   7    1.00    0.60
  -9   3   7   -0.70    1.00
  -9  -3   7    0.30    0.70
  -9  -3   7   -0.40    0.50
  -9  -3   7    0.10    0.70
   9   3   7  -10.50    8.10
  -9  -3   7   -0.70    0.70
  -9  -3   7    0.30    1.30
 -10   3   7   18.30    2.40
 -10   3   7   20.60    1.60
 -10  -3  -7   18.80    1.40
 -10   3   7   22.50    2.10
 -10   3   7   18.90    1.30
 -10   3   7   19.50    4.00
 -10   3   7   19.00    2.90
 -10  -3   7   20.80    1.90
 -10  -3   7   16.40    2.70
 -10  -3   7   19.90    2.10
 -10  -3   7   19.40    2.00
 -10  -3   7   18.30    1.70
 -11   3   7    0.10    0.60
 -11   3   7    0.10    1.30
 -11   3   7    2.20    1.80
 -11  -3  -7    0.10    0.30
 -11   3   7    0.60    0.90
 -11  -3   7   -0.40    0.50
 -11  -3   7    0.10    0.60
 -11  -3   7    0.50    0.60
 -11  -3   7   -0.50    0.40
 -12   3   7   91.19    3.90
 -12   3   7   74.19    5.20
 -12   3   7   80.79    4.30
 -12   3   7   84.39    4.50
 -12  -3   7   81.79    3.80
 -12  -3   7   82.89    3.90
 -12  -3   7   93.79    4.20
 -12  -3   7   84.19    3.90
   0   4  -7   64.99   12.30
   0   4   7   81.79    9.60
   0   4   7   78.29    5.70
   0  -4  -7   83.59   17.40
   1   4  -7    7.60    8.30
  -1   4   7   16.20    3.00
  -1   4   7   16.50    5.00
  -1  -4  -7   23.00    9.70
   1   4   7   20.10    4.80
  -1   4  -7   29.30    8.70
   1   4   7   18.30    2.50
   1  -4  -7   26.00   12.80
  -2   4   7  250.97   21.00
   2   4  -7  266.07   26.30
  -2   4   7  251.77   15.30
   2  -4  -7  248.58   29.30
  -2   4  -7  276.17   24.80
   2   4   7  255.47   15.70
   2   4   7  266.17   12.50
  -2   4  -7  255.07   13.50
  -3   4   7  345.47   34.60
  -3   4   7  303.87   19.40
  -3  -4  -7  340.77   31.60
  -3   4   7  346.07   26.90
  -3   4  -7  378.06   29.60
   3   4   7  352.66   15.90
   3   4   7  329.47   18.30
  -4  -4  -7   -6.80    5.70
  -4   4   7    4.70    4.70
   4   4   7    5.50    1.70
  -4   4  -7    3.50    5.30
  -5   4   7   29.00    8.80
  -5   4   7   42.00    4.80
  -5  -4  -7   31.40   11.90
  -5   4   7   39.40    3.30
  -5   4   7   44.10    3.20
   5   4   7   40.10    4.10
  -5   4  -7   36.50   10.30
  -5  -4   7   37.60    2.40
  -5  -4   7   35.70    2.50
  -5  -4   7   36.90    2.30
  -6   4   7   26.10    8.50
  -6   4   7   22.00    3.70
  -6  -4  -7   14.40    9.40
  -6  -4  -7   13.70    1.10
  -6   4   7   19.30    2.80
  -6   4   7   19.00    1.80
  -6  -4  -7   11.90    1.40
  -6   4   7   17.90    2.20
  -6  -4   7   17.20    1.60
   6   4   7   16.30    2.90
  -6  -4   7   13.40    1.70
  -6  -4   7  -15.50   17.20
  -6   4  -7   21.00    7.80
  -6  -4   7   16.00    1.60
  -6  -4   7   17.10    2.40
  -6  -4   7   12.80    2.20
  -7   4   7   16.80   10.20
  -7  -4  -7   21.90   20.00
  -7  -4  -7   25.80    1.70
  -7  -4  -7   32.10    1.90
  -7   4   7   26.20    2.00
  -7   4   7   34.00    4.90
  -7   4   7   23.30    3.20
  -7   4   7   35.00    3.20
  -7  -4  -7   20.80   11.60
  -7   4   7   29.20    2.40
  -7   4   7   31.90    2.10
  -7  -4   7   32.00    2.20
  -7  -4   7   18.90    8.90
   7   4   7   22.60    3.70
  -7  -4   7   31.50    2.50
  -7  -4   7   31.80    3.30
  -7  -4   7   36.60    9.00
  -7  -4   7   30.40    2.50
  -7  -4   7   32.00    2.30
  -8  -4  -7   18.80    1.30
  -8  -4  -7   17.80    1.50
  -8   4   7   19.20    2.60
  -8   4   7   16.80    1.30
  -8   4   7   20.80    1.60
  -8   4   7    9.60    5.70
  -8   4   7   17.60    2.00
  -8   4   7   21.50    3.30
  -8   4   7   20.10    4.30
  -8  -4   7   18.60    2.10
   8   4   7   14.30    3.50
  -8  -4   7   16.90    2.70
  -8  -4   7   17.60    2.00
  -8  -4   7   18.40    1.80
  -8  -4   7   16.70    1.80
  -9  -4  -7    3.20    0.70
  -9   4   7   23.30    9.10
  -9   4   7    3.90    1.40
  -9   4   7    5.10    1.10
  -9   4   7    3.60    2.50
  -9   4   7    2.60    1.50
  -9   4   7    4.00    0.80
  -9  -4   7    4.70    1.10
   9   4   7    5.30    4.00
  -9  -4   7    4.30    1.10
  -9  -4   7    4.60    1.00
  -9  -4   7    4.80    1.20
 -10  -4  -7    8.90    0.90
 -10   4   7    8.30    1.00
 -10   4   7    7.20    2.60
 -10   4   7   12.00    2.30
 -10   4   7   12.50    2.10
 -10  -4   7    8.00    1.30
 -10  -4   7    9.60    1.40
 -10  -4   7    9.80    1.40
 -10  -4   7   10.10    1.40
 -11   4   7    0.50    1.40
 -11   4   7    0.90    0.80
 -11   4   7    1.40    0.90
 -11  -4  -7    0.80    0.40
 -11   4   7    0.00    1.20
 -11  -4   7    1.90    0.60
 -11  -4   7    1.00    0.70
 -11  -4   7    1.10    0.70
 -11  -4   7    0.90    0.60
 -12   4   7  134.59    5.20
 -12   4   7  111.99    6.80
 -12   4   7  117.89    5.50
 -12  -4   7  128.19    5.00
 -12  -4   7  121.89    5.50
 -12  -4   7  115.69    5.20
   0   5   7   -0.50    2.40
   0   5   7    0.80    0.90
   0   5  -7   -3.30    5.30
  -1   5   7    8.20    2.40
  -1  -5  -7    9.90    9.60
  -1   5   7    5.30    3.50
   1   5  -7   14.70    8.80
   1   5   7    6.50    1.80
   1  -5  -7  -14.30   23.90
  -1   5  -7   11.80    7.80
   1   5   7    4.70    2.90
   2   5  -7   13.50   10.20
  -2   5   7   41.20    5.50
  -2   5   7   29.10    7.70
  -2  -5  -7   46.00   14.00
   2   5   7   32.60    3.40
  -2   5  -7   42.70   12.80
  -2   5  -7   35.70    4.80
   2  -5  -7   96.19   33.10
   2   5   7   39.30    5.90
  -3  -5  -7  186.38   24.40
  -3   5   7  195.48   20.00
  -3   5   7  161.28   13.10
  -3   5  -7  214.78   22.80
   3   5   7  180.78   10.00
  -3   5  -7  169.68   12.30
  -4   5   7   13.10    2.90
  -4  -5  -7   15.40   10.10
  -4   5   7   13.40    2.00
  -4   5   7    7.10    5.40
   4   5   7   14.10    2.60
  -4   5  -7   16.50    7.70
  -5   5   7    1.20    1.00
  -5   5   7    0.70    1.80
  -5   5   7    1.20    4.60
  -5   5   7    2.30    1.40
  -5  -5  -7   -4.40    7.20
  -5  -5   7   -0.90    0.50
  -5  -5   7    0.70    0.60
  -5   5  -7   -3.40    4.20
   5   5   7    0.00    1.00
  -5  -5   7   -0.30    0.50
   6   5  -7    8.30    0.60
  -6   5   7    0.70    4.10
  -6  -5  -7    7.50    1.00
  -6   5   7    8.10    1.30
  -6   5   7    9.40    1.90
  -6  -5  -7   -9.50    8.00
  -6   5   7    7.10    2.00
  -6   5   7    6.80    2.60
  -6  -5   7    9.30    1.40
  -6  -5   7    8.00    1.30
  -6   5  -7   -1.40    5.10
  -6  -5   7    9.10    1.40
  -6  -5   7    7.30    1.20
   6   5   7    7.00    2.40
  -7   5   7   30.70    3.50
  -7  -5  -7   31.20    2.00
  -7   5   7   29.20    4.90
  -7   5   7   26.80    2.30
  -7   5   7   31.00    3.10
  -7  -5  -7   26.60   11.70
   7   5  -7   29.40    1.50
  -7  -5  -7   29.10    1.60
  -7  -5   7   28.50    2.60
  -7  -5   7   17.40   14.50
  -7  -5   7   26.70    9.70
  -7  -5   7   28.90    2.30
  -7  -5   7   31.10    2.20
   7   5   7   34.00    4.40
  -7   5  -7   31.50    3.60
  -7  -5   7   30.00    2.40
  -8   5   7   22.30    2.00
  -8  -5  -7   23.50    1.60
  -8   5   7   21.80    3.30
  -8   5   7   11.30    8.30
  -8  -5  -7    7.00    8.40
  -8   5   7   22.50    4.60
  -8   5   7   22.20    2.60
  -8  -5   7   21.60    2.00
  -8  -5   7   19.40    1.90
   8   5   7   13.00    3.50
  -8  -5   7   17.40    1.80
  -8  -5   7   19.20    2.00
  -8   5  -7   15.10    2.50
  -9   5   7    7.00    1.20
  -9   5   7    4.60    2.30
  -9   5   7    7.60    2.80
  -9   5   7    6.90    2.10
  -9  -5  -7    7.10    1.00
  -9  -5   7    7.50    1.40
  -9  -5   7    6.20    1.10
 -10   5   7   57.89    3.90
 -10  -5  -7   57.49    2.80
 -10   5   7   59.59    4.60
 -10   5   7   61.89    3.20
 -10  -5   7   59.79    3.30
 -10  -5   7   54.49    3.30
 -10  -5   7   54.59    3.20
 -10  -5   7   55.99    3.20
 -11  -5  -7   20.50    1.20
 -11   5   7   22.50    1.50
 -11   5   7   18.40    3.30
 -11   5   7   20.90    2.70
 -11   5   7   22.00    2.30
 -11  -5   7   27.10    2.10
 -11  -5   7   19.00    1.70
 -11  -5   7   21.80    1.70
 -12   5   7    0.00    0.50
 -12   5   7    1.10    1.10
 -12   5   7    1.20    1.00
 -12  -5   7    1.50    0.50
 -12  -5   7    1.10    0.50
 -12  -5   7    0.60    0.30
   0   6   7    6.20    1.80
   0   6  -7    9.40    8.80
   0  -6  -7   20.40   12.90
   0   6   7    6.70    3.70
  -1   6   7   -0.70    1.20
  -1  -6  -7   10.30    7.70
   1   6  -7  -10.60    6.90
  -1   6   7    1.60    2.90
   1  -6  -7  -10.40    9.40
   1   6   7    3.20    2.30
   1   6   7    0.00    0.80
  -1   6  -7    6.80    5.80
  -2  -6  -7   85.99   17.80
   2   6  -7   68.19   18.20
  -2   6   7   72.69   12.20
  -2   6   7   80.09    8.10
  -2   6  -7   86.19   16.00
  -2   6  -7   92.69    8.60
   2   6   7   86.59    9.70
  -3   6   7   15.90    4.60
  -3   6   7   28.60    9.30
  -3  -6  -7   20.60   10.30
   3   6  -7   22.60    1.30
  -3   6  -7   23.40   10.60
   3   6   7   25.50    1.20
   3   6   7   29.20    5.60
   3   6   7   26.20    3.30
  -3   6  -7   24.20    5.50
  -4   6   7   -1.20    5.70
  -4   6   7    3.50    1.10
  -4  -6  -7   -9.50    6.80
   4   6  -7    0.00    0.20
  -4   6   7   -1.10    1.60
   4   6   7    1.90    1.10
  -5   6   7    2.10    1.30
  -5   6   7    1.10    1.10
  -5   6   7   -3.40   12.00
  -5   6   7    0.30    1.80
  -5  -6  -7   -6.00    6.70
   5   6  -7    0.20    0.20
  -5  -6   7    0.30    0.60
  -5   6  -7    5.80    6.40
   5   6   7    0.30    0.20
   5  -6  -7    1.00    0.30
  -5   6  -7    1.70    1.50
   5   6   7    1.40    1.30
  -5  -6   7    0.90    0.70
  -6   6   7  210.98   10.30
  -6   6   7  206.58    8.70
   6   6  -7  194.28    7.80
  -6   6   7  213.08   27.30
  -6  -6  -7  173.18   26.90
  -6   6   7  226.48   14.30
  -6  -6  -7  185.18    8.20
  -6   6   7  214.78    9.80
  -6  -6   7  225.08   26.60
  -6   6  -7  188.28    9.60
  -6  -6   7  204.58    8.70
  -6  -6   7  198.78    8.80
   6   6   7  206.58   12.40
  -6  -6   7  201.08    8.80
   7   6  -7    1.60    0.30
  -7  -6  -7   -8.20   17.20
  -7   6   7    2.30    0.80
  -7   6   7    0.60    2.00
  -7  -6  -7    1.90    0.60
  -7   6   7    1.10    1.50
  -7   6   7    1.60    1.10
  -7   6   7  -10.10    6.30
  -7  -6   7    1.40    0.80
  -7   6  -7   -0.60    1.70
  -7  -6   7    0.60    0.60
   7   6   7   -1.30    1.60
  -7  -6   7   -9.70   11.10
  -7  -6   7    1.40    0.70
  -7  -6   7    1.40    0.80
  -8  -6  -7   18.80   17.90
  -8   6   7   18.20    1.60
  -8  -6  -7   -0.10   11.90
   8   6  -7   14.00    0.90
  -8   6   7    9.30    2.20
  -8  -6  -7   12.90    1.20
  -8   6   7   15.30    4.00
  -8   6   7   15.80    2.20
  -8   6   7   11.70   11.60
   8   6   7   10.20    3.40
  -8   6  -7   15.60    2.20
  -8  -6   7   14.50    1.50
  -8  -6   7   13.50    1.70
  -8  -6   7   14.00    1.70
  -8  -6   7   13.10    1.60
  -9   6   7    3.50    1.40
  -9  -6  -7    2.80    0.60
  -9   6   7    4.90    0.90
  -9   6   7    3.80    1.90
  -9   6   7    3.20    2.40
  -9  -6   7    4.40    0.90
  -9  -6   7    2.80    0.70
  -9  -6   7    4.00    0.90
  -9  -6   7    4.80    1.10
 -10   6   7   23.30    2.30
 -10  -6  -7   24.00    2.00
 -10   6   7   24.20    1.60
 -10   6   7   24.40    3.00
 -10   6   7   20.60    3.90
 -10  -6   7   26.60    2.00
 -10  -6   7   23.60    1.90
 -10  -6   7   23.00    1.80
 -11   6   7   15.50    2.90
 -11   6   7   21.50    2.50
 -11   6   7   20.30    1.80
 -11  -6  -7   17.20    1.00
 -11  -6   7   20.00    1.40
 -11  -6   7   19.20    1.50
 -11  -6   7   19.90    1.50
 -12   6   7    2.60    1.20
 -12   6   7    3.20    0.60
 -12   6   7    4.90    1.10
 -12  -6   7    4.40    0.60
 -12  -6   7    3.70    0.60
   0   7   7    0.20    3.40
   0  -7  -7    0.00    0.20
   0   7  -7    0.00    0.20
   0   7  -7   -7.90    6.20
  -1  -7  -7   10.20   12.40
  -1  -7  -7    3.40    0.40
  -1   7   7    0.20    1.70
   1   7  -7    1.90    0.30
  -1   7   7    0.40    3.00
   1   7  -7   -2.60    5.90
  -1   7  -7    3.10    0.40
   1   7   7    4.50    1.60
  -1   7  -7   -5.60    7.40
   1  -7  -7    3.20    0.40
   1   7   7    2.60    0.30
   2   7  -7  230.78   29.20
  -2   7   7  192.88   20.80
  -2  -7  -7  218.98   27.50
  -2  -7  -7  191.18    7.50
  -2   7   7  195.28   14.00
   2  -7  -7  180.28    7.50
  -2   7  -7  201.58    7.70
  -2   7  -7  212.08   15.80
   2   7   7  204.68   19.80
   2   7   7  210.88   11.40
  -2   7  -7  186.58   25.40
  -3   7   7  203.88   16.00
  -3   7   7  233.78   12.40
  -3   7   7  255.87   26.10
   3   7  -7  223.48    8.90
  -3  -7  -7  270.87   31.60
   3   7   7  260.07   13.20
   3   7   7  230.08   17.90
   3   7   7  238.18    8.90
  -3  -7   7  229.58    8.90
  -3   7  -7  227.68   18.10
  -4   7   7   74.49    7.00
  -4  -7  -7   63.89    2.70
  -4  -7  -7   96.09   24.40
  -4   7   7   78.79    4.60
   4   7  -7   68.49    2.90
  -4   7   7   67.99    4.70
  -4  -7   7   59.99    2.90
  -4   7  -7   67.99   16.80
   4   7   7   69.29    2.80
   4  -7  -7   65.69    2.80
   5   7  -7    2.00    0.40
  -5   7   7    1.20    2.00
  -5   7   7    8.60    7.60
  -5  -7  -7   -3.10   12.00
  -5   7   7    2.10    1.40
  -5   7   7    1.90    1.10
   5   7   7    2.10    1.50
  -5   7  -7    7.70    7.70
  -5  -7   7    1.50    0.70
   5  -7  -7    1.90    0.30
  -5   7  -7    1.50    1.40
  -5  -7   7    2.20    0.80
   5   7   7    1.20    0.30
  -6   7   7  343.07   14.00
  -6  -7  -7  327.37   36.40
   6   7  -7  306.87   11.80
  -6  -7  -7  305.27   13.00
  -6   7   7  310.17   17.60
  -6   7   7  289.97   31.60
  -6   7   7  305.07   14.20
   6  -7  -7  285.07   11.60
  -6  -7   7  304.27   12.70
   6   7   7  314.77   11.70
  -6  -7   7  316.47   12.80
  -6  -7   7  315.17   32.90
   6   7   7  308.47   16.90
  -7   7   7   -0.70   10.90
  -7   7   7    7.40    3.10
  -7  -7  -7    7.30   16.00
  -7   7   7    6.70    1.60
  -7  -7  -7    5.50    0.80
  -7   7   7    5.20    2.00
   7   7  -7    6.30    0.60
  -7  -7   7  -12.50   11.50
  -7   7  -7    5.80    1.80
   7   7   7    7.20    2.90
  -7  -7   7    6.00    1.00
  -7  -7   7    8.10    1.30
  -7  -7   7    5.60    1.10
  -8   7   7   84.99    8.00
  -8  -7  -7   82.39    3.80
  -8   7   7   90.59    6.60
   8   7  -7   76.69    3.40
  -8   7  -7   83.39    5.00
  -8  -7   7   79.99    4.20
  -8  -7   7   85.19    4.50
  -8  -7   7   89.59    4.50
   9   7  -7   77.69    3.10
  -9   7   7   65.89    6.80
  -9   7   7   78.89    5.40
  -9   7   7   80.79    4.60
  -9  -7  -7   74.39    3.40
  -9  -7   7   80.79    4.10
  -9  -7   7   75.79    3.70
  -9  -7   7   74.89    4.00
 -10   7   7   40.30    2.80
 -10  -7  -7   38.70    2.20
 -10   7   7   42.10    3.50
 -10   7   7   36.60    4.60
 -10  -7   7   38.00    2.40
 -10  -7   7   41.40    2.20
 -10  -7   7   45.90    2.60
 -11   7   7   18.90    2.20
 -11   7   7   15.90    2.60
 -11   7   7   17.50    1.50
 -11  -7   7   18.70    1.20
 -11  -7   7   19.30    1.30
 -11  -7   7   19.80    1.30
   0  -8  -7  331.77   39.90
   0   8   7  306.47   16.00
   0   8  -7  277.07   33.50
   0  -8  -7  282.47   10.80
   0   8  -7  261.37   14.80
   0   8  -7  287.97   10.80
   0   8   7  281.97   24.50
   1   8  -7    6.20    0.60
  -1   8   7    6.70    3.10
  -1  -8  -7    7.30    0.60
  -1   8   7    7.80    5.80
   1   8  -7   13.70   11.70
  -1  -8  -7    5.70   15.90
   1   8   7    8.20    0.60
  -1   8  -7    2.70    7.70
   1  -8  -7    6.70    0.60
  -1   8  -7    6.80    0.60
   1   8   7    9.10    2.40
   1   8   7   12.50    5.20
  -2  -8  -7   88.49   25.20
  -2  -8  -7   72.29    3.00
  -2   8   7   63.49   14.60
  -2   8   7   61.99    8.40
   2   8  -7   92.89   26.90
   2   8  -7   71.69    3.10
  -2   8   7   76.29    4.70
  -2   8  -7   73.79    3.00
  -2   8  -7   73.39   20.40
   2   8   7   77.39    6.40
   2   8   7   82.99   11.30
   2  -8  -7   71.79    3.00
   2   8   7   72.09    3.00
  -3   8   7   21.60    6.50
  -3  -8  -7   31.00   15.30
   3   8  -7   18.60    1.10
  -3   8   7   19.60    2.70
  -3  -8  -7   19.00    1.00
  -3   8   7   18.30    8.90
   3   8   7   15.70    3.00
   3   8   7    8.40    5.00
   3  -8  -7   19.40    1.00
  -3   8  -7   27.90   12.10
   3   8   7   17.50    1.00
  -3  -8   7   19.20    1.00
  -4   8   7    2.90    1.50
  -4  -8  -7    1.10    0.30
  -4   8   7   -2.40    2.00
  -4  -8  -7    7.50   13.60
  -4   8   7   -0.30    1.00
  -4   8  -7   -7.20    7.30
   4   8   7   -0.40    1.70
  -4   8  -7    1.80    1.50
   4  -8  -7    0.50    0.30
   4   8   7    6.70    5.20
   4   8   7    0.60    0.30
  -4  -8   7    1.30    0.30
  -5   8   7   21.60    2.60
  -5   8   7   19.90    3.20
   5   8  -7   16.70    1.10
  -5   8   7    8.20    9.50
  -5   8   7   15.10    3.80
   5   8   7   17.90    1.10
  -5  -8   7   12.20   12.40
   5   8   7   18.40    3.60
  -5  -8   7   17.60    1.70
   5   8   7   10.90    7.20
  -6   8   7   29.20    5.30
  -6   8   7   36.60   12.70
  -6   8   7   33.30    3.70
   6   8  -7   33.70    1.70
  -6   8   7   38.60    3.20
  -6  -8  -7   32.00   18.00
   6   8  -7   23.60    6.10
   6   8   7   24.70    4.40
  -6  -8   7   43.90   17.50
  -6  -8   7   33.80    2.60
  -6  -8   7   33.70    2.40
   6  -8  -7   33.90    1.60
  -6   8  -7   34.50    3.40
   6   8   7   35.70    1.70
   7   8  -7   22.80    1.30
  -7   8   7    4.30   11.80
  -7   8   7   25.90    4.90
  -7   8   7   26.40    3.50
  -7   8   7   26.20    2.60
   7   8  -7   16.30    5.30
  -7  -8  -7   17.20   18.50
  -7  -8   7   23.80    1.90
  -7   8  -7   24.50    2.80
  -7  -8   7   15.60   14.10
  -7  -8   7   23.90    2.20
   7   8   7   19.20    4.30
  -7  -8   7   22.70    2.00
  -8   8   7   14.70    2.70
  -8   8   7   10.20    3.30
  -8  -8  -7   13.90    1.10
  -8   8   7   12.20    1.90
   8   8  -7   13.00    0.80
  -8   8  -7    8.00    1.90
  -8  -8   7   12.60    1.60
  -8  -8   7   14.80    1.20
  -8  -8   7    9.40    1.40
   9   8  -7    9.90    0.70
  -9   8   7    8.10    1.40
  -9   8   7    8.30    2.20
  -9  -8  -7    9.00    1.00
  -9  -8   7    6.80    1.10
  -9  -8   7   10.60    1.00
  -9  -8   7   10.90    1.30
 -10   8   7    7.50    1.70
 -10   8   7    8.10    2.30
 -10   8   7    7.40    1.10
 -10  -8   7    8.50    1.00
 -10  -8   7    8.10    1.10
 -11   8   7   36.50    2.50
 -11   8   7   31.30    2.90
 -11  -8   7   35.90    1.80
 -11  -8   7   31.20    1.70
   0   9   7   -2.50    3.80
   0   9   7    1.80    2.40
   0   9  -7   18.90   26.50
  -1   9   7   87.99    9.40
  -1  -9  -7   92.79    3.70
  -1  -9  -7   73.99   27.30
  -1   9   7   78.79   14.80
   1   9  -7   91.59    3.70
   1   9  -7   50.79   26.90
   1   9  -7   81.19    7.70
   1  -9  -7   89.89    3.70
  -1   9  -7  127.59   28.40
   1   9   7   96.19    7.80
  -1   9  -7   93.99    3.70
   1   9   7   98.99   14.80
  -2   9   7   13.70    5.60
  -2  -9  -7   17.00    0.90
  -2   9   7   25.20   10.50
  -2   9   7   17.50    2.50
   2   9  -7   17.80    1.10
  -2   9  -7    5.30    6.70
   2   9   7   19.00    3.70
   2  -9  -7   16.80    1.00
  -2  -9   7   17.10    1.00
  -2   9  -7   16.50    0.90
   2   9   7   12.60    5.50
   2   9   7   15.90    1.00
  -2   9  -7   21.80   12.40
   3   9  -7    7.20    3.80
[truncated: 328,341 more chars]
