# Supplementary material for: Sesquiterpenes from the Fungus Antrodiella albocinnamomea with Cytotoxicity and Antibacterial Activity
Source: J Fungi (Basel). 2023 Apr 28;9(5):521. doi: 10.3390/jof9050521 (PMC10219565; doi:10.3390/jof9050521)
Supplement: Supplementary file 1 [file jof-09-00521-s001.zip › Compound 5 cif.cif]

data_global
_audit_creation_method                  'APEX3 v2018.1-0'

_publ_requested_journal                 ?

_publ_contact_author_name               ?
_publ_contact_author_address            
;
;
_publ_contact_author_email              ?
_publ_contact_author_fax                ?
_publ_contact_author_phone              ?

_publ_section_title                     
;
;
_publ_section_abstract                  
;
;
_publ_section_references                
;
;
_publ_section_comment                   
;
;

data_lyw37
_chemical_name_systematic               ?
_chemical_name_common                   ?
_chemical_formula_moiety                'C15 H22 O3'
_chemical_formula_sum                   'C15 H22 O3'
_chemical_formula_iupac                 ?
_chemical_formula_weight                250.32
_chemical_absolute_configuration        ad

_chemical_melting_point                 ?

_space_group_crystal_system             orthorhombic
_space_group_name_H-M_alt               'P 21 21 21'
_space_group_name_Hall                  'P 2ac 2ab'
loop_
    _space_group_symop_operation_xyz
    'x, y, z'
    'x+1/2, -y+1/2, -z'
    '-x, y+1/2, -z+1/2'
    '-x+1/2, -y, z+1/2'

_cell_length_a                          7.7864(4)
_cell_length_b                          9.0991(4)
_cell_length_c                          19.0099(9)
_cell_angle_alpha                       90
_cell_angle_beta                        90
_cell_angle_gamma                       90
_cell_volume                            1346.84(11)
_cell_formula_units_Z                   4
_cell_measurement_reflns_used           9889
_cell_measurement_theta_min             4.6522
_cell_measurement_theta_max             72.2139
_cell_measurement_temperature           100.(2)

_exptl_crystal_description              prism
_exptl_crystal_colour                   'clear light colourless'
_exptl_crystal_size_max                 0.820
_exptl_crystal_size_mid                 0.570
_exptl_crystal_size_min                 0.440
_exptl_crystal_density_diffrn           1.235
_exptl_crystal_density_meas             ?
_exptl_crystal_density_method           'not measured'
_exptl_crystal_F_000                    544

_exptl_absorpt_coefficient_mu           0.676
_exptl_absorpt_correction_type          Multi-Scan
_exptl_absorpt_process_details          
;
SADABS-2016/2 - Bruker AXS area detector scaling and absorption correction
;
_exptl_absorpt_correction_T_min         0.63
_exptl_absorpt_correction_T_max         0.76

_exptl_special_details                  
;
; 

_diffrn_ambient_temperature             100.(2)

_diffrn_source                          'Ius Diamond'
_diffrn_source_type                     Microfocus

_diffrn_radiation_type                  'Cu K\a'
_diffrn_radiation_wavelength            1.54178
_diffrn_radiation_monochromator         'Helixos MX multilayer Optic'

_diffrn_measurement_device_type         'Bruker D8 QUEST PHOTON II'
_diffrn_measurement_method              ?

_diffrn_detector_area_resol_mean        7.3910

_diffrn_reflns_number                   12794
_diffrn_reflns_av_R_equivalents         0.0419
_diffrn_reflns_av_unetI/netI            0.0307
_diffrn_reflns_theta_min                4.65
_diffrn_reflns_theta_max                72.21
_diffrn_reflns_theta_full               72.21
_diffrn_measured_fraction_theta_max     0.992
_diffrn_measured_fraction_theta_full    0.992
_diffrn_reflns_limit_h_min              -7
_diffrn_reflns_limit_h_max              9
_diffrn_reflns_limit_k_min              -11
_diffrn_reflns_limit_k_max              11
_diffrn_reflns_limit_l_min              -23
_diffrn_reflns_limit_l_max              22

_refine_special_details                 
;
;

_reflns_number_total                    2639
_reflns_number_gt                       2621
_reflns_threshold_expression            'I > 2\s(I)'

_refine_ls_structure_factor_coef        Fsqd
_refine_ls_matrix_type                  full
_refine_ls_R_factor_all                 0.0312
_refine_ls_R_factor_gt                  0.0309
_refine_ls_wR_factor_gt                 0.0806
_refine_ls_wR_factor_ref                0.0808
_refine_ls_goodness_of_fit_ref          1.088
_refine_ls_restrained_S_all             1.088
_refine_ls_number_reflns                2639
_refine_ls_number_parameters            168
_refine_ls_number_restraints            0
_refine_ls_number_constraints           ?
_refine_ls_hydrogen_treatment           constr
_refine_ls_weighting_scheme             calc
_refine_ls_weighting_details            
    'w=1/[\s^2^(Fo^2^)+(0.0427P)^2^+0.2785P] where P=(Fo^2^+2Fc^2^)/3'

_atom_sites_solution_hydrogens          geom
_atom_sites_solution_primary            ?
_atom_sites_solution_secondary          ?

_refine_ls_shift/su_max                 0.000
_refine_ls_shift/su_mean                0.000
_refine_diff_density_max                0.252
_refine_diff_density_min                -0.215
_refine_ls_extinction_method            none
_refine_ls_extinction_coef              ?
_refine_ls_abs_structure_details        
;

Flack x determined using 1083 quotients [(I+)-(I-)]/[(I+)+(I-)]
(Parsons, Flack and Wagner, Acta Cryst. B69 (2013) 249-259).
;
_refine_ls_abs_structure_Flack          0.01(5)

loop_
    _atom_type_symbol
    _atom_type_description
    _atom_type_scat_dispersion_real
    _atom_type_scat_dispersion_imag
    _atom_type_scat_source
    C C 0.0181 0.0091 'International Tables Vol C Tables 4.2.6.8 and 6.1.1.4'
    H H 0.0000 0.0000 'International Tables Vol C Tables 4.2.6.8 and 6.1.1.4'
    O O 0.0492 0.0322 'International Tables Vol C Tables 4.2.6.8 and 6.1.1.4'

_computing_data_collection              'Bruker Instrument Service vV6.2.9'
_computing_cell_refinement              'SAINT V8.38A (Bruker AXS Inc., 2017)'
_computing_data_reduction               'SAINT V8.38A (Bruker AXS Inc., 2017)'
_computing_structure_solution           'SHELXT 2014/5 (Sheldrick, 2014)'
_computing_structure_refinement         'SHELXL-2017/1 (Sheldrick, 2017)'
_computing_molecular_graphics           'shelXle (C.B. Huebschle, rev 882)'
_computing_publication_material         ?

loop_
    _atom_site_type_symbol
    _atom_site_label
    _atom_site_fract_x
    _atom_site_fract_y
    _atom_site_fract_z
    _atom_site_U_iso_or_equiv
    _atom_site_adp_type
    _atom_site_calc_flag
    _atom_site_refinement_flags_adp
    _atom_site_refinement_flags_occupancy
    _atom_site_refinement_flags_posn
    _atom_site_occupancy
    _atom_site_disorder_assembly
    _atom_site_disorder_group
    O O1 0.70121(15) 0.34853(13) 0.46111(6) 0.0171(3) Uani d . . . 1 . .
    H H16 0.657316 0.29869 0.493671 0.026 Uiso calc U . R 1 . .
    O O2 0.03643(14) 0.30675(14) 0.43628(6) 0.0178(3) Uani d . . . 1 . .
    H H22 -0.067893 0.317973 0.446163 0.027 Uiso calc U . R 1 . .
    O O3 0.0539(2) 0.30699(17) 0.13087(7) 0.0335(4) Uani d . . . 1 . .
    C C1 0.5030(2) 0.72608(19) 0.44811(9) 0.0194(3) Uani d . . . 1 . .
    H H20 0.491263 0.744561 0.498671 0.029 Uiso calc U . R 1 . .
    H H21 0.404033 0.76764 0.42325 0.029 Uiso calc U . R 1 . .
    H H1 0.608654 0.772195 0.430848 0.029 Uiso calc U . R 1 . .
    C C2 0.5110(2) 0.55936(17) 0.43487(8) 0.0135(3) Uani d . . . 1 . .
    C C3 0.3432(2) 0.48418(18) 0.45775(8) 0.0143(3) Uani d . . . 1 . .
    H H7 0.303666 0.522987 0.503623 0.017 Uiso calc U . R 1 . .
    H H8 0.359266 0.376582 0.461808 0.017 Uiso calc U . R 1 . .
    C C4 0.2138(2) 0.52113(18) 0.39925(8) 0.0139(3) Uani d . . . 1 . .
    H H6 0.151421 0.613548 0.411773 0.017 Uiso calc U . R 1 . .
    C C5 0.0810(2) 0.40036(18) 0.37874(8) 0.0147(3) Uani d . . . 1 . .
    H H5 -0.026042 0.450577 0.362343 0.018 Uiso calc U . R 1 . .
    C C6 0.1586(2) 0.31692(18) 0.31559(8) 0.0154(3) Uani d . . . 1 . .
    C C7 0.2757(2) 0.18947(18) 0.33865(9) 0.0193(3) Uani d . . . 1 . .
    H H14 0.332529 0.147384 0.297295 0.029 Uiso calc U . R 1 . .
    H H15 0.206563 0.113613 0.361821 0.029 Uiso calc U . R 1 . .
    H H2 0.362618 0.226259 0.371523 0.029 Uiso calc U . R 1 . .
    C C8 0.6689(2) 0.50179(18) 0.47337(8) 0.0156(3) Uani d . . . 1 . .
    H H3 0.770434 0.559056 0.458201 0.019 Uiso calc U . R 1 . .
    H H4 0.653553 0.517852 0.524492 0.019 Uiso calc U . R 1 . .
    C C9 0.51451(19) 0.52734(18) 0.35543(8) 0.0138(3) Uani d . . . 1 . .
    H H19 0.553716 0.425654 0.346194 0.017 Uiso calc U . R 1 . .
    H H18 0.591604 0.59669 0.330677 0.017 Uiso calc U . R 1 . .
    C C10 0.32545(19) 0.54855(17) 0.33155(8) 0.0130(3) Uani d . . . 1 . .
    H H17 0.307949 0.651288 0.314301 0.016 Uiso calc U . R 1 . .
    C C11 0.25415(19) 0.44147(17) 0.27945(8) 0.0133(3) Uani d . . . 1 . .
    C C12 0.0353(2) 0.2642(2) 0.25754(9) 0.0213(4) Uani d . . . 1 . .
    H H13 0.036827 0.155714 0.253791 0.026 Uiso calc U . R 1 . .
    H H9 -0.083652 0.296715 0.267424 0.026 Uiso calc U . R 1 . .
    C C13 0.1024(2) 0.3347(2) 0.19012(9) 0.0191(4) Uani d . . . 1 . .
    C C14 0.22767(19) 0.44952(18) 0.20996(9) 0.0150(3) Uani d . . . 1 . .
    C C15 0.2904(2) 0.56040(19) 0.15805(8) 0.0181(3) Uani d . . . 1 . .
    H H10 0.339461 0.644556 0.183176 0.027 Uiso calc U . R 1 . .
    H H12 0.194303 0.593586 0.1288 0.027 Uiso calc U . R 1 . .
    H H11 0.378633 0.515804 0.128115 0.027 Uiso calc U . R 1 . .

loop_
    _atom_site_aniso_label
    _atom_site_aniso_U_11
    _atom_site_aniso_U_22
    _atom_site_aniso_U_33
    _atom_site_aniso_U_12
    _atom_site_aniso_U_13
    _atom_site_aniso_U_23
    O1 0.0131(5) 0.0187(6) 0.0195(6) 0.0016(5) 0.0033(4) 0.0047(4)
    O2 0.0092(5) 0.0269(6) 0.0173(6) 0.0011(5) 0.0026(4) 0.0096(5)
    O3 0.0408(8) 0.0429(8) 0.0169(6) -0.0228(7) -0.0049(6) -0.0018(6)
    C1 0.0250(8) 0.0164(7) 0.0168(7) -0.0003(7) -0.0026(7) -0.0023(6)
    C2 0.0143(7) 0.0158(7) 0.0104(7) -0.0002(6) 0.0005(6) 0.0001(6)
    C3 0.0119(7) 0.0191(7) 0.0119(7) 0.0011(6) 0.0013(6) 0.0008(6)
    C4 0.0118(7) 0.0175(7) 0.0123(7) 0.0024(6) 0.0015(6) 0.0010(6)
    C5 0.0112(7) 0.0199(8) 0.0131(7) 0.0003(6) 0.0003(6) 0.0047(6)
    C6 0.0137(7) 0.0171(8) 0.0155(7) -0.0032(6) -0.0003(6) 0.0014(6)
    C7 0.0226(8) 0.0173(8) 0.0180(7) 0.0021(7) 0.0036(7) 0.0004(6)
    C8 0.0131(7) 0.0192(8) 0.0145(7) -0.0016(6) -0.0019(6) 0.0004(6)
    C9 0.0115(7) 0.0184(7) 0.0114(7) -0.0013(6) 0.0014(6) -0.0002(5)
    C10 0.0136(7) 0.0146(7) 0.0107(7) 0.0003(6) 0.0003(6) 0.0013(6)
    C11 0.0093(7) 0.0153(7) 0.0153(7) 0.0011(6) 0.0018(6) 0.0010(6)
    C12 0.0199(8) 0.0261(8) 0.0179(8) -0.0098(7) -0.0009(7) 0.0005(7)
    C13 0.0184(8) 0.0226(8) 0.0162(7) -0.0045(7) -0.0005(6) -0.0004(7)
    C14 0.0116(7) 0.0177(7) 0.0156(7) 0.0003(6) 0.0006(6) -0.0009(6)
    C15 0.0197(8) 0.0220(8) 0.0126(7) -0.0031(6) 0.0013(6) 0.0005(6)

_geom_special_details                   
;

All esds (except the esd in the dihedral angle between two l.s. planes)
are estimated using the full covariance matrix.  The cell esds are taken
into account individually in the estimation of esds in distances, angles
and torsion angles; correlations between esds in cell parameters are only
used when they are defined by crystal symmetry.  An approximate (isotropic)
treatment of cell esds is used for estimating esds involving l.s. planes.
;

loop_
    _geom_bond_atom_site_label_1
    _geom_bond_atom_site_label_2
    _geom_bond_site_symmetry_2
    _geom_bond_distance
    _geom_bond_publ_flag
    O1 C8 . 1.436(2) ?
    O1 H16 . 0.84 ?
    O2 C5 . 1.4291(19) ?
    O2 H22 . 0.84 ?
    O3 C13 . 1.214(2) ?
    C1 C2 . 1.539(2) ?
    C1 H20 . 0.98 ?
    C1 H21 . 0.98 ?
    C1 H1 . 0.98 ?
    C2 C8 . 1.523(2) ?
    C2 C3 . 1.537(2) ?
    C2 C9 . 1.538(2) ?
    C3 C4 . 1.538(2) ?
    C3 H7 . 0.99 ?
    C3 H8 . 0.99 ?
    C4 C5 . 1.559(2) ?
    C4 C10 . 1.573(2) ?
    C4 H6 . 1.0 ?
    C5 C6 . 1.544(2) ?
    C5 H5 . 1.0 ?
    C6 C11 . 1.520(2) ?
    C6 C7 . 1.539(2) ?
    C6 C12 . 1.540(2) ?
    C7 H14 . 0.98 ?
    C7 H15 . 0.98 ?
    C7 H2 . 0.98 ?
    C8 H3 . 0.99 ?
    C8 H4 . 0.99 ?
    C9 C10 . 1.553(2) ?
    C9 H19 . 0.99 ?
    C9 H18 . 0.99 ?
    C10 C11 . 1.496(2) ?
    C10 H17 . 1.0 ?
    C11 C14 . 1.339(2) ?
    C12 C13 . 1.525(2) ?
    C12 H13 . 0.99 ?
    C12 H9 . 0.99 ?
    C13 C14 . 1.479(2) ?
    C14 C15 . 1.493(2) ?
    C15 H10 . 0.98 ?
    C15 H12 . 0.98 ?
    C15 H11 . 0.98 ?

loop_
    _geom_angle_atom_site_label_1
    _geom_angle_atom_site_label_2
    _geom_angle_atom_site_label_3
    _geom_angle_site_symmetry_1
    _geom_angle_site_symmetry_3
    _geom_angle
    _geom_angle_publ_flag
    C8 O1 H16 . . 109.5 ?
    C5 O2 H22 . . 109.5 ?
    C2 C1 H20 . . 109.5 ?
    C2 C1 H21 . . 109.5 ?
    H20 C1 H21 . . 109.5 ?
    C2 C1 H1 . . 109.5 ?
    H20 C1 H1 . . 109.5 ?
    H21 C1 H1 . . 109.5 ?
    C8 C2 C3 . . 113.37(13) ?
    C8 C2 C9 . . 113.09(13) ?
    C3 C2 C9 . . 102.03(12) ?
    C8 C2 C1 . . 107.04(13) ?
    C3 C2 C1 . . 110.97(13) ?
    C9 C2 C1 . . 110.36(13) ?
    C2 C3 C4 . . 104.77(12) ?
    C2 C3 H7 . . 110.8 ?
    C4 C3 H7 . . 110.8 ?
    C2 C3 H8 . . 110.8 ?
    C4 C3 H8 . . 110.8 ?
    H7 C3 H8 . . 108.9 ?
    C3 C4 C5 . . 117.50(13) ?
    C3 C4 C10 . . 105.32(12) ?
    C5 C4 C10 . . 105.90(12) ?
    C3 C4 H6 . . 109.3 ?
    C5 C4 H6 . . 109.3 ?
    C10 C4 H6 . . 109.3 ?
    O2 C5 C6 . . 113.40(13) ?
    O2 C5 C4 . . 112.94(13) ?
    C6 C5 C4 . . 106.33(12) ?
    O2 C5 H5 . . 108.0 ?
    C6 C5 H5 . . 108.0 ?
    C4 C5 H5 . . 108.0 ?
    C11 C6 C7 . . 113.63(13) ?
    C11 C6 C12 . . 102.34(12) ?
    C7 C6 C12 . . 109.83(14) ?
    C11 C6 C5 . . 100.16(12) ?
    C7 C6 C5 . . 112.40(13) ?
    C12 C6 C5 . . 117.78(14) ?
    C6 C7 H14 . . 109.5 ?
    C6 C7 H15 . . 109.5 ?
    H14 C7 H15 . . 109.5 ?
    C6 C7 H2 . . 109.5 ?
    H14 C7 H2 . . 109.5 ?
    H15 C7 H2 . . 109.5 ?
    O1 C8 C2 . . 113.42(13) ?
    O1 C8 H3 . . 108.9 ?
    C2 C8 H3 . . 108.9 ?
    O1 C8 H4 . . 108.9 ?
    C2 C8 H4 . . 108.9 ?
    H3 C8 H4 . . 107.7 ?
    C2 C9 C10 . . 104.29(12) ?
    C2 C9 H19 . . 110.9 ?
    C10 C9 H19 . . 110.9 ?
    C2 C9 H18 . . 110.9 ?
    C10 C9 H18 . . 110.9 ?
    H19 C9 H18 . . 108.9 ?
    C11 C10 C9 . . 117.68(13) ?
    C11 C10 C4 . . 103.49(12) ?
    C9 C10 C4 . . 105.36(11) ?
    C11 C10 H17 . . 110.0 ?
    C9 C10 H17 . . 110.0 ?
    C4 C10 H17 . . 110.0 ?
    C14 C11 C10 . . 132.42(15) ?
    C14 C11 C6 . . 114.29(14) ?
    C10 C11 C6 . . 111.60(13) ?
    C13 C12 C6 . . 104.93(13) ?
    C13 C12 H13 . . 110.8 ?
    C6 C12 H13 . . 110.8 ?
    C13 C12 H9 . . 110.8 ?
    C6 C12 H9 . . 110.8 ?
    H13 C12 H9 . . 108.8 ?
    O3 C13 C14 . . 126.04(16) ?
    O3 C13 C12 . . 125.85(15) ?
    C14 C13 C12 . . 107.98(14) ?
    C11 C14 C13 . . 108.34(14) ?
    C11 C14 C15 . . 129.68(15) ?
    C13 C14 C15 . . 121.65(14) ?
    C14 C15 H10 . . 109.5 ?
    C14 C15 H12 . . 109.5 ?
    H10 C15 H12 . . 109.5 ?
    C14 C15 H11 . . 109.5 ?
    H10 C15 H11 . . 109.5 ?
    H12 C15 H11 . . 109.5 ?

loop_
    _geom_torsion_atom_site_label_1
    _geom_torsion_atom_site_label_2
    _geom_torsion_atom_site_label_3
    _geom_torsion_atom_site_label_4
    _geom_torsion_site_symmetry_1
    _geom_torsion_site_symmetry_2
    _geom_torsion_site_symmetry_3
    _geom_torsion_site_symmetry_4
    _geom_torsion
    _geom_torsion_publ_flag
    C8 C2 C3 C4 . . . . -163.27(13) ?
    C9 C2 C3 C4 . . . . -41.34(15) ?
    C1 C2 C3 C4 . . . . 76.23(15) ?
    C2 C3 C4 C5 . . . . 143.46(14) ?
    C2 C3 C4 C10 . . . . 25.89(16) ?
    C3 C4 C5 O2 . . . . 30.38(19) ?
    C10 C4 C5 O2 . . . . 147.64(13) ?
    C3 C4 C5 C6 . . . . -94.60(16) ?
    C10 C4 C5 C6 . . . . 22.65(16) ?
    O2 C5 C6 C11 . . . . -158.26(13) ?
    C4 C5 C6 C11 . . . . -33.56(15) ?
    O2 C5 C6 C7 . . . . -37.31(19) ?
    C4 C5 C6 C7 . . . . 87.39(15) ?
    O2 C5 C6 C12 . . . . 91.88(17) ?
    C4 C5 C6 C12 . . . . -143.43(14) ?
    C3 C2 C8 O1 . . . . 62.05(18) ?
    C9 C2 C8 O1 . . . . -53.49(18) ?
    C1 C2 C8 O1 . . . . -175.25(13) ?
    C8 C2 C9 C10 . . . . 162.78(13) ?
    C3 C2 C9 C10 . . . . 40.65(15) ?
    C1 C2 C9 C10 . . . . -77.35(15) ?
    C2 C9 C10 C11 . . . . -139.44(14) ?
    C2 C9 C10 C4 . . . . -24.78(16) ?
    C3 C4 C10 C11 . . . . 123.51(13) ?
    C5 C4 C10 C11 . . . . -1.64(15) ?
    C3 C4 C10 C9 . . . . -0.63(16) ?
    C5 C4 C10 C9 . . . . -125.78(13) ?
    C9 C10 C11 C14 . . . . -101.3(2) ?
    C4 C10 C11 C14 . . . . 143.02(17) ?
    C9 C10 C11 C6 . . . . 94.75(16) ?
    C4 C10 C11 C6 . . . . -20.94(16) ?
    C7 C6 C11 C14 . . . . 107.33(16) ?
    C12 C6 C11 C14 . . . . -11.01(18) ?
    C5 C6 C11 C14 . . . . -132.60(14) ?
    C7 C6 C11 C10 . . . . -85.61(16) ?
    C12 C6 C11 C10 . . . . 156.06(14) ?
    C5 C6 C11 C10 . . . . 34.46(16) ?
    C11 C6 C12 C13 . . . . 14.00(17) ?
    C7 C6 C12 C13 . . . . -107.00(15) ?
    C5 C6 C12 C13 . . . . 122.62(15) ?
    C6 C12 C13 O3 . . . . 170.53(19) ?
    C6 C12 C13 C14 . . . . -13.36(19) ?
    C10 C11 C14 C13 . . . . -160.81(16) ?
    C6 C11 C14 C13 . . . . 2.82(19) ?
    C10 C11 C14 C15 . . . . 12.5(3) ?
    C6 C11 C14 C15 . . . . 176.16(15) ?
    O3 C13 C14 C11 . . . . -177.00(19) ?
    C12 C13 C14 C11 . . . . 6.90(19) ?
    O3 C13 C14 C15 . . . . 9.0(3) ?
    C12 C13 C14 C15 . . . . -167.08(14) ?

loop_
    _geom_hbond_atom_site_label_D
    _geom_hbond_atom_site_label_H
    _geom_hbond_atom_site_label_A
    _geom_hbond_site_symmetry_A
    _geom_hbond_distance_DH
    _geom_hbond_distance_HA
    _geom_hbond_distance_DA
    _geom_hbond_angle_DHA
    _geom_hbond_publ_flag
    O1 H16 O2 2_556 0.84 1.89 2.7290(16) 174.2 ?
    O2 H22 O1 1_455 0.84 1.84 2.6796(15) 175.6 ?
    C4 H6 O3 3 1.00 2.51 3.382(2) 145.2 ?

_shelx_res_file                         
;

TITL lyw37_0m_a.res in P2(1)2(1)2(1)
    lyw37_0m.res
    created by SHELXL-2017/1 at 14:31:46 on 13-Jul-2021
CELL 1.54178 7.7864 9.0991 19.0099 90.000 90.000 90.000
ZERR 4.00 0.0004 0.0004 0.0009 0.000 0.000 0.000
LATT -1
SYMM x+1/2, -y+1/2, -z
SYMM -x, y+1/2, -z+1/2
SYMM -x+1/2, -y, z+1/2
SFAC C H O
UNIT 60 88 12
LIST 4 ! automatically inserted. Change 6 to 4 for CHECKCIF!!
TEMP -173.160
SIZE 0.440 0.570 0.820
ACTA
EQIV $1 x+1/2, -y+1/2, -z+1
HTAB O1 O2_$1
EQIV $2 x-1, y, z
HTAB O2 O1_$2
EQIV $3 -x, y+1/2, -z+1/2
HTAB C4 O3_$3
L.S. 4
FMAP 2
PLAN -4 0 0.00
HTAB
BOND $H
CONF
WGHT    0.042700    0.278500
FVAR       1.33214
O1    3    0.701214    0.348529    0.461112    11.00000    0.01307    0.01874 =
         0.01952    0.00466    0.00327    0.00157
AFIX 147
H16   2    0.657316    0.298690    0.493671    11.00000   -1.50000
AFIX   0
O2    3    0.036433    0.306749    0.436280    11.00000    0.00920    0.02693 =
         0.01725    0.00957    0.00260    0.00114
AFIX 147
H22   2   -0.067893    0.317973    0.446163    11.00000   -1.50000
AFIX   0
O3    3    0.053884    0.306995    0.130871    11.00000    0.04077    0.04290 =
         0.01691   -0.00175   -0.00488   -0.02277
C1    1    0.503014    0.726077    0.448113    11.00000    0.02497    0.01638 =
         0.01681   -0.00233   -0.00259   -0.00035
AFIX 137
H20   2    0.491263    0.744561    0.498671    11.00000   -1.50000
H21   2    0.404033    0.767640    0.423250    11.00000   -1.50000
H1    2    0.608654    0.772195    0.430848    11.00000   -1.50000
AFIX   0
C2    1    0.511013    0.559359    0.434872    11.00000    0.01427    0.01577 =
         0.01039    0.00013    0.00053   -0.00025
C3    1    0.343248    0.484184    0.457750    11.00000    0.01187    0.01906 =
         0.01188    0.00081    0.00133    0.00109
AFIX  23
H7    2    0.303666    0.522987    0.503623    11.00000   -1.20000
H8    2    0.359266    0.376582    0.461808    11.00000   -1.20000
AFIX   0
C4    1    0.213820    0.521125    0.399245    11.00000    0.01184    0.01750 =
         0.01228    0.00098    0.00147    0.00235
AFIX  13
H6    2    0.151421    0.613548    0.411773    11.00000   -1.20000
AFIX   0
C5    1    0.080956    0.400361    0.378736    11.00000    0.01120    0.01994 =
         0.01308    0.00474    0.00032    0.00026
AFIX  13
H5    2   -0.026042    0.450577    0.362343    11.00000   -1.20000
AFIX   0
C6    1    0.158634    0.316921    0.315585    11.00000    0.01367    0.01708 =
         0.01551    0.00141   -0.00026   -0.00319
C7    1    0.275716    0.189473    0.338650    11.00000    0.02261    0.01734 =
         0.01802    0.00038    0.00363    0.00213
AFIX 137
H14   2    0.332529    0.147384    0.297295    11.00000   -1.50000
H15   2    0.206563    0.113613    0.361821    11.00000   -1.50000
H2    2    0.362618    0.226259    0.371523    11.00000   -1.50000
AFIX   0
C8    1    0.668862    0.501794    0.473367    11.00000    0.01312    0.01917 =
         0.01455    0.00035   -0.00188   -0.00165
AFIX  23
H3    2    0.770434    0.559056    0.458201    11.00000   -1.20000
H4    2    0.653553    0.517852    0.524492    11.00000   -1.20000
AFIX   0
C9    1    0.514506    0.527336    0.355434    11.00000    0.01153    0.01842 =
         0.01137   -0.00022    0.00138   -0.00128
AFIX  23
H19   2    0.553716    0.425654    0.346194    11.00000   -1.20000
H18   2    0.591604    0.596690    0.330677    11.00000   -1.20000
AFIX   0
C10   1    0.325445    0.548546    0.331547    11.00000    0.01359    0.01463 =
         0.01073    0.00132    0.00034    0.00027
AFIX  13
H17   2    0.307949    0.651288    0.314301    11.00000   -1.20000
AFIX   0
C11   1    0.254150    0.441469    0.279454    11.00000    0.00929    0.01530 =
         0.01526    0.00104    0.00181    0.00114
C12   1    0.035266    0.264227    0.257536    11.00000    0.01985    0.02606 =
         0.01794    0.00048   -0.00094   -0.00976
AFIX  23
H13   2    0.036827    0.155714    0.253791    11.00000   -1.20000
H9    2   -0.083652    0.296715    0.267424    11.00000   -1.20000
AFIX   0
C13   1    0.102376    0.334668    0.190119    11.00000    0.01838    0.02258 =
         0.01624   -0.00041   -0.00046   -0.00447
C14   1    0.227667    0.449523    0.209962    11.00000    0.01157    0.01765 =
         0.01564   -0.00085    0.00061    0.00032
C15   1    0.290409    0.560396    0.158052    11.00000    0.01971    0.02198 =
         0.01263    0.00053    0.00134   -0.00311
AFIX 137
H10   2    0.339461    0.644556    0.183176    11.00000   -1.50000
H12   2    0.194303    0.593586    0.128800    11.00000   -1.50000
H11   2    0.378633    0.515804    0.128115    11.00000   -1.50000

AFIX   0
HKLF 4 1 1 0 0 0 1 0 0 0 1


REM  lyw37_0m_a.res in P2(1)2(1)2(1)
REM R1 =  0.0309 for    2621 Fo > 4sig(Fo)  and  0.0312 for all    2639 data
REM    168 parameters refined using      0 restraints

END

WGHT      0.0427      0.2785

REM Instructions for potential hydrogen bonds
HTAB O1 O2_$1
HTAB O2 O1_$2
HTAB C4 O3_$3

REM Highest difference peak  0.252,  deepest hole -0.215,  1-sigma level  0.059
Q1    1   0.5239  0.5597  0.3953  11.00000  0.05    0.25
Q2    1   0.1488  0.4673  0.3922  11.00000  0.05    0.22
Q3    1   0.2017  0.4815  0.2496  11.00000  0.05    0.21
Q4    1   0.2094  0.3847  0.3007  11.00000  0.05    0.19
;
_shelx_res_checksum                     7338

_shelx_hkl_file                         
;
   2   0   0  407.96   20.90
   2   0   0  399.56   20.40
   2   0   0  460.75   20.50
   3   0   0    2.10    0.70
   4   0   0 5235.88  248.18
   5   0   0    0.50    0.70
   5   0   0    1.50    0.80
   5   0   0    0.20    0.80
   6   0   0  757.32   36.80
   6   0   0  722.23   37.30
   6   0   0  724.13   38.30
   6   0   0  774.02   38.00
   6   0   0  712.83   36.40
   6   0   0  691.43   36.70
   8   0   0   29.70    3.10
   8   0   0   33.00    3.30
   8   0   0   32.60    3.00
   8   0   0   27.60    2.70
   9   0   0    0.10    0.40
   9   0   0   -0.60    0.50
   0  -1   0    3.70    1.00
   0   1   0    2.70    0.30
   3  -1   0  334.27   16.90
   3   1   0  333.37   16.90
   3  -1   0  316.17   15.70
   3  -1   0  316.77   16.20
   3   1   0  300.27   16.10
   3   1   0  303.87   15.90
   4   1   0  757.62   38.30
   4  -1   0  807.32   38.10
   5   1   0  164.88   10.30
   5  -1   0  145.29    9.50
   5  -1   0  172.98    9.90
   5   1   0  151.38    8.80
   5   1   0  148.99    9.00
   5   1   0  161.08    9.90
   5   1   0  133.89    9.00
   5   1   0  154.68    9.30
   5  -1   0  157.88    8.90
   5  -1   0  154.98    8.60
   5  -1   0  137.59    8.60
   5   1   0  143.99   10.00
   5  -1   0  142.09    8.80
   6   1   0 1120.79   54.99
   6  -1   0 1097.59   54.19
   6   1   0 1179.18   56.29
   6  -1   0 1150.88   56.09
   6   1   0 1077.69   54.69
   6   1   0 1090.19   54.29
   6  -1   0 1144.79   55.59
   6  -1   0 1091.89   55.39
   6   1   0 1046.20   55.59
   6  -1   0 1110.29   54.39
   6   1   0 1093.89   54.89
   6  -1   0 1078.29   54.39
   6   1   0 1121.49   56.29
   7  -1   0  206.08   12.60
   7   1   0  188.98   11.90
   7  -1   0  216.48   12.60
   7  -1   0  183.58   11.70
   7   1   0  210.68   13.20
   7   1   0  207.28   12.20
   7   1   0  200.28   11.40
   7   1   0  190.08   11.80
   7  -1   0  208.78   13.10
   7  -1   0  197.78   11.30
   7   1   0  193.38   12.90
   8   1   0  110.39    7.60
   8   1   0   96.59    7.00
   8  -1   0   99.89    6.30
   8  -1   0  106.29    7.20
   8   1   0  101.09    6.70
   8  -1   0  105.19    7.50
   8  -1   0  105.99    6.50
   8   1   0   97.89    6.30
   9  -1   0    9.20    1.10
   9   1   0   10.70    1.40
   9   1   0    7.50    1.10
   0  -2   0 1302.77   67.69
   0   2   0 1365.56   64.19
   3  -2   0  987.80   50.09
   3   2   0 1025.60   53.59
   3   2   0 1017.30   54.19
   3   2   0 1195.18   52.49
   3  -2   0 1017.00   53.99
   4   2   0   57.09    5.10
   4  -2   0   58.69    3.70
   5   2   0    6.60    1.70
   5  -2   0    3.00    1.50
   5   2   0    6.30    1.70
   5  -2   0    4.80    1.80
   5  -2   0    6.80    1.50
   5   2   0    4.70    1.60
   5  -2   0    6.30    1.30
   5  -2   0    6.00    1.30
   5  -2   0    7.80    1.60
   5   2   0    5.10    1.10
   6  -2   0  174.28   11.00
   6   2   0  184.48   11.00
   6  -2   0  195.68   12.00
   6  -2   0  176.38   11.50
   6  -2   0  167.98   12.10
   6  -2   0  159.88   11.60
   6   2   0  179.98   10.40
   6   2   0  185.38   13.00
   7   2   0    2.40    1.20
   7   2   0    0.10    0.90
   7  -2   0    4.90    1.40
   7  -2   0    1.50    1.10
   7  -2   0    2.30    1.40
   7   2   0    1.60    1.00
   7   2   0    0.40    0.90
   7  -2   0    0.60    0.70
   8  -2   0   34.00    3.40
   8   2   0   27.70    3.00
   8  -2   0   26.40    3.00
   8  -2   0   25.80    2.50
   8   2   0   27.20    2.50
   8   2   0   28.30    3.50
   8   2   0   31.60    3.00
   9   2   0    5.00    1.10
   9  -2   0    4.40    0.90
   9   2   0    6.00    0.90
   9  -2   0    6.20    1.10
   9   2   0    4.60    1.00
  -1  -3   0 3284.47  167.38
   1   3   0 3685.53  161.08
   1   3   0 3025.50  160.48
   1  -3   0 3515.15  167.18
   3  -3   0 9999.00  468.55
   3   3   0 9845.01  476.95
   4   3   0 1462.65   73.49
   4  -3   0 1439.86   74.29
   4  -3   0 1590.64   68.89
   4   3   0 1457.45   74.59
   4   3   0 1235.08   71.09
   5   3   0   35.30    4.60
   5  -3   0   39.60    3.00
   5   3   0   29.80    3.30
   5  -3   0   27.20    3.50
   5   3   0   31.00    3.20
   5   3   0   41.60    3.90
   5   3   0   29.20    2.90
   5  -3   0   42.90    3.10
   5  -3   0   32.40    4.50
   5   3   0   36.80    4.00
   6  -3   0    1.30    0.80
   6  -3   0    2.70    1.70
   6   3   0    1.20    1.70
   6   3   0    3.20    1.40
   6   3   0    2.50    1.20
   6   3   0    3.90    1.70
   7   3   0  298.97   17.40
   7  -3   0  322.57   19.70
   7  -3   0  316.77   16.50
   7   3   0  292.87   18.00
   7  -3   0  310.97   18.10
   7   3   0  335.77   17.20
   7   3   0  334.97   17.90
   8   3   0  924.11   43.10
   8  -3   0  891.91   44.20
   8  -3   0  832.02   43.00
   8   3   0  900.81   44.10
   8  -3   0  913.71   43.90
   8   3   0  871.71   44.40
   8   3   0  862.21   43.90
   9   3   0  264.27   12.50
   9   3   0  245.08   12.90
   9   3   0  268.07   13.40
   9  -3   0  223.88   12.80
   0  -4   0 4214.58  209.88
   0   4   0 4221.98  201.18
   1   4   0 1332.87   60.29
   1  -4   0 1253.07   67.99
  -1   4   0 1182.58   60.19
  -1   4   0 1202.08   58.59
   1   4   0 1158.68   59.29
  -1  -4   0 1213.98   68.69
   2  -4   0  328.47   23.60
  -2  -4   0  273.77   24.10
   2   4   0  314.97   16.90
   2   4   0  293.67   17.60
  -2   4   0  329.07   15.40
   2  -4   0  322.67   15.50
   3  -4   0  305.27   15.30
   3  -4   0  311.87   23.20
   3   4   0  314.17   22.60
   3   4   0  291.37   24.90
   3   4   0  307.17   17.30
   4   4   0  502.95   26.40
   4   4   0  523.05   27.20
   4  -4   0  466.05   26.60
   4   4   0  505.65   26.30
   4   4   0  493.15   33.80
   5   4   0  309.87   17.40
   5   4   0  298.77   17.70
   5  -4   0  307.87   16.30
   5   4   0  314.37   16.60
   5   4   0  323.47   19.00
   5  -4   0  341.07   18.30
   5  -4   0  305.87   18.20
   5   4   0  322.47   18.00
   6   4   0  739.43   41.40
   6   4   0  793.52   41.30
   6  -4   0  801.02   39.70
   6   4   0  828.32   39.90
   6   4   0  850.01   43.40
   6  -4   0  899.61   42.10
   6   4   0  757.72   40.90
   7   4   0   16.50    2.30
   7   4   0   13.40    2.30
   7   4   0   15.00    1.80
   7  -4   0   15.80    2.80
  -7   4   0   14.30    3.90
   7  -4   0   18.20    2.70
   7   4   0   17.40    2.50
   8  -4   0   45.20    3.80
   8   4   0   44.40    4.20
   8   4   0   44.70    3.70
   8  -4   0   45.60    3.00
   8   4   0   49.70    3.10
   8   4   0   43.40    3.60
   1   5   0   18.60    2.20
  -1   5   0   15.60    2.50
  -1  -5   0    9.50    4.80
   1  -5   0   22.90    5.90
  -2   5   0  298.57   18.10
   2  -5   0  335.47   26.10
   2  -5   0  316.57   15.50
   2   5   0  308.47   17.10
   2   5   0  285.17   18.10
   3   5   0  633.44   33.60
   3   5   0  691.43   42.50
   3   5   0  600.14   34.40
   3  -5   0  677.73   31.40
   3  -5   0  692.83   43.60
   3   5   0  568.44   32.20
   4   5   0   13.10    2.20
   4  -5   0   18.60    2.70
   4   5   0   13.00    2.10
  -4  -5   0   11.60    1.70
   4   5   0   14.40    5.40
   4   5   0   16.30    2.60
   4   5   0   13.00    2.90
   4  -5   0   12.70    2.50
   4  -5   0   11.60    4.70
   5  -5   0   21.60    3.10
  -5  -5   0   19.10    2.50
   5  -5   0   21.60    2.10
   5   5   0   16.00    2.40
   5   5   0   20.70    2.60
   5   5   0   21.00    2.60
   5   5   0   21.40    2.90
   5  -5   0   26.60    3.40
   5   5   0   24.60    3.10
  -6   5   0    2.00    1.70
   6  -5   0    0.70    0.70
   6   5   0    1.90    1.30
   6  -5   0    5.10    1.80
   6   5   0    2.60    1.20
   6   5   0    4.90    2.80
   6  -5   0    0.60    1.80
   6   5   0    2.20    1.40
   7   5   0  261.87   14.80
   7   5   0  270.17   15.10
  -7   5   0  263.07   17.60
   7  -5   0  283.37   15.70
   7   5   0  268.07   15.30
   8   5   0   28.20    2.40
   8  -5   0   30.40    2.90
   8   5   0   29.60    2.70
   0  -6   0 1600.94   92.09
   0  -6   0 1551.64   75.29
   0   6   0 1542.55   75.49
   1  -6   0 4121.29  199.28
  -1  -6   0 3584.24  199.48
   1   6   0 3928.11  182.08
   1  -6   0 3651.63  180.78
  -1  -6   0 3744.53  181.08
   2   6   0  506.75   27.10
  -2   6   0  465.65   28.20
   2  -6   0  515.35   26.00
  -2  -6   0  535.55   25.80
   2   6   0  488.45   29.00
   2  -6   0  551.94   25.40
  -3   6   0  169.38   13.50
  -3  -6   0  212.28   11.20
   3   6   0  200.88   13.00
   3   6   0  229.18   21.80
   3   6   0  191.68   11.60
   3  -6   0  208.58   21.60
   3  -6   0  214.08   12.40
   4   6   0  313.97   17.80
   4   6   0  290.67   17.00
  -4  -6   0  319.97   16.30
   4   6   0  326.77   18.70
   4   6   0  290.77   17.00
   4  -6   0  280.37   17.70
   4  -6   0  330.37   19.10
  -4   6   0  277.87   19.50
   4   6   0  340.87   26.80
   5   6   0 1779.22   84.59
   5   6   0 1494.95   85.59
   5   6   0 1526.65   86.49
  -5   6   0 1817.82   92.09
  -5  -6   0 1808.32   83.59
   5  -6   0 1997.70   85.39
   5   6   0 1784.42   85.39
   5   6   0 1661.53   91.79
   6  -6   0  312.97   18.00
  -6  -6   0  291.77   16.00
  -6   6   0  319.77   20.20
   6   6   0  316.67   17.60
   6   6   0  325.07   17.10
   6   6   0  298.47   17.00
   7   6   0   21.60    2.50
   7  -6   0   21.30    2.90
   7   6   0   20.80    2.50
   7   6   0   21.70    2.30
   8   6   0  107.99    6.00
   8  -6   0   98.89    5.80
   8   6   0  101.99    5.60
   1   7   0  916.11   48.00
  -1  -7   0  882.71   44.00
   1  -7   0  895.11   43.90
   1  -7   0  895.71   62.09
  -2  -7   0  206.28   11.20
   2   7   0  189.48   11.70
   2  -7   0  189.68   22.90
   2  -7   0  201.68   10.80
   2   7   0  209.58   12.80
   3   7   0   96.19    7.10
   3  -7   0  109.59    7.80
   3   7   0  116.19   16.80
  -3   7   0  105.29    9.30
   3   7   0  115.89    8.70
   3  -7   0  107.69   16.00
  -3  -7   0  112.79    6.90
   4  -7   0   89.29    7.10
   4   7   0   77.39    6.40
  -4   7   0   65.39    7.40
   4   7   0   73.59    7.30
  -4  -7   0   83.19    5.40
   4   7   0   84.99    6.10
   4  -7   0   84.49    6.40
   4   7   0   67.79   12.90
   5  -7   0  180.98   11.80
  -5   7   0  183.78   13.40
  -5  -7   0  180.88   10.00
   5   7   0  172.78   11.20
   5   7   0  167.28   10.50
  -6   7   0    2.20    2.30
  -6  -7   0    2.50    0.90
   6   7   0    2.50    1.20
   6  -7   0    5.20    1.40
   7   7   0  123.09    7.20
   7  -7   0  120.89    7.30
   7   7   0  115.99    6.70
   0   8   0 1511.45   73.59
   0  -8   0 1335.17   68.69
  -1   8   0   82.29    7.90
   1  -8   0   70.49    4.80
   1   8   0   59.99    8.30
  -1  -8   0   75.59    5.10
   1  -8   0   71.09    6.60
  -2   8   0   50.69    8.40
  -2  -8   0   52.19    4.10
   2   8   0   57.09    4.50
   2  -8   0   55.89    3.70
   3   8   0   12.60    7.30
   3   8   0    8.90    2.40
   3  -8   0    1.70    1.30
   4   8   0  524.45   27.90
   4   8   0  502.25   26.90
  -4   8   0  524.35   30.10
  -4  -8   0  511.25   26.50
   4  -8   0  560.64   28.60
   5   8   0   63.79    5.10
  -5   8   0   66.39    6.80
   5   8   0   61.99    4.60
  -5  -8   0   64.69    4.50
   5  -8   0   59.19    5.30
   6   8   0   76.49    5.00
   6   8   0   62.39    4.20
   6  -8   0   63.29    4.90
  -6  -8   0   73.59    4.10
   0  -9   0    0.70    0.60
   0   9   0   -2.90    4.20
   1   9   0  323.17   18.20
  -1  -9   0  344.17   18.10
  -1   9   0  363.66   22.30
   1  -9   0  360.06   17.80
  -2   9   0  147.69   11.70
   2   9   0  131.99    8.60
  -2  -9   0  153.38    8.60
   2  -9   0  150.28    9.10
   3   9   0  167.98   10.30
  -3   9   0  157.38   12.20
   3   9   0  152.98    9.30
  -3  -9   0  161.38    9.10
   3  -9   0  158.88   10.40
  -4  -9   0   98.59    6.60
   4   9   0   93.79    5.90
   4  -9   0   98.49    7.00
   4   9   0   96.59    6.70
   5   9   0   19.50    1.70
   5  -9   0   22.20    2.40
  -5  -9   0   23.20    1.80
   5   9   0   26.70    2.40
   0  10   0   75.89    4.80
   0 -10   0   74.89    4.60
   1 -10   0    4.20    0.80
   1  10   0    6.30    1.30
  -1 -10   0    5.10    1.10
   1 -10   0    3.00    1.60
   2  10   0  159.68    8.40
   2 -10   0  166.58   10.10
  -2 -10   0  130.99    8.70
   3  10   0  423.16   22.90
   3 -10   0  497.35   24.60
  -3 -10   0  469.05   23.30
   3  10   0  489.45   24.10
   4  10   0  322.37   17.00
   4 -10   0  336.17   17.30
  -4 -10   0  334.27   16.50
   0  11   0    0.60    0.60
   1  11   0   96.49    5.60
  -1 -11   0   87.09    4.80
   1 -11   0   88.49    5.60
  -1   0   1 2481.25  117.19
   2   0   1 1722.53   76.89
   2   0  -1 1434.96   78.29
   2   0  -1 1694.73   76.79
   3   0   1  822.62   40.70
   3   0  -1  860.51   41.50
   3   0  -1  858.61   41.30
   3   0  -1  827.32   41.50
   4   0  -1  129.89    8.80
   4   0   1  146.69    8.40
   4   0   1  171.98    9.30
   4   0  -1  157.98    8.30
   5   0   1 1289.27   62.99
   5   0  -1 1288.87   63.19
   5   0   1 1296.87   64.59
   5   0   1 1195.48   63.19
   5   0   1 1366.86   63.19
   5   0  -1 1407.86   64.39
   5   0   1 1339.87   63.29
   5   0   1 1380.06   64.49
   5   0  -1 1213.68   63.19
   5   0   1 1224.48   63.69
   5   0  -1 1286.27   63.09
   6   0  -1 1218.08   63.69
   6   0   1 1300.37   64.49
   6   0  -1 1342.57   63.89
   6   0   1 1360.16   65.69
   6   0  -1 1261.07   63.49
   6   0   1 1248.98   63.79
   6   0   1 1326.57   63.49
   6   0  -1 1356.96   65.29
   6   0  -1 1351.46   64.39
   6   0   1 1275.27   63.69
   6   0  -1 1297.07   64.79
   7   0  -1  243.98   13.80
   7   0   1  232.38   14.40
   7   0  -1  226.88   13.00
   7   0  -1  219.88   13.20
   7   0   1  234.68   14.90
   7   0  -1  234.48   14.40
   7   0   1  238.98   13.60
   7   0  -1  217.98   14.10
   7   0   1  238.88   14.10
   7   0   1  231.98   12.90
   7   0   1  251.97   13.40
   7   0  -1  231.18   13.30
   8   0  -1    9.70    1.60
   8   0  -1   11.20    2.00
   8   0   1   14.70    1.90
   8   0   1   12.30    1.60
   8   0  -1   11.00    1.70
   8   0   1   15.30    2.10
   8   0   1   10.30    2.10
   8   0   1   12.00    2.20
   8   0  -1   13.20    2.00
   9   0   1   60.49    3.80
   9   0  -1   53.29    3.70
   9   0  -1   65.39    4.00
   0  -1   1 1138.19   55.09
   0  -1  -1 1108.89   55.19
   0  -1  -1 1085.89   52.59
   3   1  -1 2256.67  105.69
   3  -1   1 2161.78  103.39
   3   1  -1 1943.01  105.19
   3  -1  -1 2263.27  105.89
   3   1   1 2207.58  103.59
   3  -1  -1 2213.28  103.19
   4  -1   1  605.94   29.50
   4   1  -1  550.04   30.50
   4  -1   1  618.84   30.00
   4   1   1  591.84   29.70
   4  -1  -1  593.34   29.10
   4   1   1  624.24   30.90
   5   1  -1 1699.13   87.79
   5   1  -1 1952.90   89.09
   5  -1   1 1722.43   87.39
   5   1  -1 1803.32   87.69
   5  -1   1 1830.22   88.99
   5  -1   1 1941.11   88.69
   5  -1   1 1773.42   88.49
   5  -1   1 1894.31   87.59
   5   1  -1 1838.42   88.59
   5  -1   1 1928.21   87.39
   5   1  -1 1724.63   88.69
   5  -1   1 1842.72   87.39
   5   1  -1 1733.93   87.49
   5  -1  -1 1706.43   87.39
   5   1   1 1671.93   87.69
   5   1   1 1860.21   88.89
   5  -1  -1 1935.61   87.59
   5   1   1 1764.52   87.99
   5  -1  -1 1940.41   88.49
   5   1   1 1856.01   87.89
   5   1   1 1910.21   89.29
   5  -1  -1 1816.52   91.59
   5   1   1 1714.63   88.99
   5   1   1 1759.82   87.39
   5  -1  -1 1775.02   87.39
   6  -1   1  166.28   10.20
   6  -1   1  179.88   11.20
   6  -1   1  181.88   11.80
   6   1  -1  175.68   10.70
   6  -1   1  161.08   11.00
   6  -1   1  168.08   10.00
   6  -1   1  178.18   10.30
   6   1  -1  180.78   10.40
   6   1  -1  164.58   10.40
   6   1  -1  176.18   10.70
   6   1  -1  186.28   11.70
   6   1  -1  167.78   11.30
   6  -1  -1  183.28   10.40
   6   1   1  174.78   11.80
   6   1   1  175.58   10.70
   6   1   1  179.38   10.20
   6  -1  -1  180.68   11.60
   6   1   1  168.78   10.70
   6  -1  -1  180.78   10.30
   6  -1  -1  173.08   11.00
   6   1   1  184.28   11.90
   6   1   1  172.78   11.50
   6   1   1  188.48   10.70
   6  -1  -1  170.88   10.20
   6  -1  -1  176.68   11.10
   7   1  -1  658.93   34.40
   7  -1   1  674.43   33.90
   7  -1   1  709.73   35.40
   7   1  -1  663.83   35.70
   7  -1   1  675.83   34.40
   7  -1   1  745.13   36.50
   7  -1   1  637.44   35.10
   7   1  -1  652.13   34.50
   7  -1   1  674.33   34.10
   7   1  -1  765.42   35.10
   7   1  -1  673.83   34.10
   7   1  -1  645.64   35.70
   7  -1  -1  718.23   35.80
   7  -1  -1  745.73   35.20
   7   1   1  664.23   33.90
   7  -1  -1  640.74   34.00
   7   1   1  660.03   34.90
   7   1   1  674.13   36.00
   7   1   1  677.73   35.80
   7   1   1  694.23   34.60
   7  -1  -1  662.33   34.00
   7   1   1  664.83   34.50
   7  -1  -1  631.64   35.00
   7  -1  -1  657.53   34.80
   8   1  -1  229.18   13.90
   8  -1   1  266.07   15.00
   8   1  -1  244.68   13.40
   8  -1   1  275.67   14.50
   8  -1   1  238.68   13.20
   8   1  -1  247.28   13.70
   8  -1   1  259.47   13.50
   8   1   1  274.77   14.70
   8   1   1  240.88   13.70
   8   1   1  231.08   14.70
   8   1   1  251.17   13.40
   8  -1  -1  229.98   13.30
   8  -1  -1  243.98   13.90
   8  -1  -1  248.68   13.40
   9   1  -1  238.88   12.40
   9  -1   1  227.28   12.30
   9  -1   1  245.98   12.90
   9   1  -1  248.98   12.60
   9   1   1  245.98   12.50
   9   1   1  240.18   12.30
   9  -1  -1  235.58   12.40
   0  -2  -1 2338.97  110.29
   0   2  -1 2222.28  106.09
   0  -2   1 2112.29  109.69
  -1   2  -1 4607.74  217.58
   2   2  -1  658.23   36.00
   2   2  -1  760.42   38.60
   2   2  -1  725.03   39.50
   2   2  -1  708.63   35.20
   2  -2   1  693.53   34.30
   2  -2   1  748.23   38.60
   2   2   1  704.23   38.80
   2  -2  -1  694.23   34.10
   2  -2  -1  727.43   39.10
   2   2   1  746.53   35.60
   3   2  -1 1442.06   73.09
   3  -2   1 1431.86   68.19
   3  -2   1 1365.06   71.49
   3   2  -1 1541.85   72.59
   3   2  -1 1418.16   69.59
   3   2   1 1314.47   71.49
   3  -2  -1 1379.96   72.59
   3   2   1 1455.05   70.19
   3  -2  -1 1447.06   67.89
   3   2   1 1413.96   68.69
   3   2   1 1495.45   71.19
   4  -2   1  168.98    8.90
   4   2  -1  140.09   10.30
   4   2  -1  154.48   10.70
   4   2  -1  167.28   10.50
   4   2   1  161.58   10.60
   4  -2  -1  183.18   11.70
   4  -2  -1  165.48    8.50
   5   2  -1   61.19    4.80
   5  -2   1   59.89    5.40
   5  -2   1   61.79    4.30
   5  -2   1   56.59    4.30
   5   2  -1   63.29    5.30
   5   2  -1   69.69    5.40
   5  -2   1   67.59    5.40
   5  -2   1   71.79    4.60
   5   2  -1   57.79    4.90
   5   2  -1   61.89    5.60
   5  -2   1   65.49    5.00
   5   2  -1   60.49    5.50
   5  -2   1   58.19    4.40
   5   2   1   60.89    5.70
   5   2   1   64.69    5.60
   5  -2  -1   57.59    4.50
   5   2   1   65.39    4.50
   5   2   1   64.69    5.40
   5  -2  -1   65.69    5.30
   5   2   1   63.79    5.00
   5  -2  -1   67.29    4.60
   5  -2  -1   58.69    4.30
   5  -2  -1   56.09    6.10
   5   2   1   65.59    4.90
   6   2  -1  493.85   25.00
   6  -2   1  498.35   25.60
   6  -2   1  460.95   27.00
   6   2  -1  504.45   28.30
   6  -2   1  516.05   26.70
   6  -2   1  535.65   27.40
   6  -2   1  481.55   26.00
   6   2  -1  518.75   27.20
   6   2   1  448.46   30.00
   6   2   1  501.95   25.50
   6   2   1  413.56   25.90
   6  -2  -1  444.76   25.40
   6  -2  -1  439.46   26.80
   6   2   1  437.56   27.60
   6  -2  -1  541.95   26.40
   6   2   1  394.86   28.40
   6   2   1  502.95   24.60
   7  -2   1  269.47   14.70
   7   2  -1  265.47   15.60
   7  -2   1  280.37   16.20
   7   2  -1  240.38   16.00
   7   2  -1  273.37   15.40
   7  -2   1  283.67   16.80
   7  -2   1  279.97   14.80
   7   2  -1  261.37   14.90
   7   2   1  279.57   14.80
   7  -2  -1  289.87   16.30
   7   2   1  301.17   16.10
   7  -2  -1  283.67   14.90
   7  -2  -1  263.47   14.80
   7  -2  -1  276.87   16.00
   7   2   1  270.67   15.60
   7   2   1  290.77   17.00
   7   2   1  267.57   16.50
   8   2  -1  213.48   12.40
   8   2  -1  199.98   10.90
   8  -2   1  192.38   10.80
   8  -2   1  210.08   12.00
   8  -2   1  199.88   12.20
   8   2  -1  195.78   11.40
   8   2  -1  177.38   11.20
   8   2   1  197.08   11.40
   8  -2  -1  194.48   10.80
   8   2   1  196.68   11.60
   8   2   1  190.98   12.20
   8  -2  -1  215.28   11.70
   8   2   1  193.78   10.80
   9  -2   1  399.96   20.70
   9   2  -1  479.65   21.60
   9   2  -1  429.16   21.10
   9  -2   1  418.86   22.00
   9   2   1  435.56   21.10
   9  -2  -1  399.96   20.70
   9   2   1  418.56   20.60
   9   2   1  387.76   21.10
   0   3   1  110.69    6.60
   0   3   1  106.29    6.10
   0   3  -1  100.99    5.80
   0   3  -1  113.29    6.70
   0  -3  -1  111.39   10.70
  -1  -3  -1 1367.26   76.09
   1  -3   1 1551.14   76.19
   1   3   1 1374.56   69.79
   1   3   1 1523.85   69.99
   1  -3  -1 1461.15   75.99
  -1  -3   1 1425.96   76.49
   2  -3   1 3175.78  155.28
   2   3  -1 3173.28  157.48
   2   3  -1 3076.59  156.18
   2  -3   1 3531.45  162.68
   2   3  -1 3216.38  166.68
   2  -3  -1 3497.55  163.08
   2   3   1 3197.98  156.68
   2  -3  -1 3328.17  155.08
   2   3   1 3310.97  163.98
   3  -3   1  196.88   10.20
   3   3  -1  173.88   11.30
   3  -3   1  210.98   15.50
   3   3  -1  221.28   15.70
   3   3   1  182.28   15.90
   3  -3  -1  203.88   15.90
   3   3   1  174.58   11.60
   3  -3  -1  214.78    9.90
   4  -3   1  146.19    7.60
   4   3  -1  141.29   11.80
   4   3  -1  113.39    8.80
   4   3   1  118.39   10.40
   4  -3  -1  147.79   12.30
   4  -3  -1  137.09    7.10
   4   3   1  131.79   10.00
   5   3  -1   79.29    6.20
   5  -3   1   74.69    6.20
   5   3  -1   73.79    5.80
   5   3  -1   80.49    5.70
   5  -3   1   80.99    5.10
   5  -3   1   74.69    4.90
   5   3  -1   76.19    5.20
   5  -3   1   82.19    6.40
   5   3  -1   71.69    6.60
   5   3   1   69.89    6.60
   5   3   1   74.19    5.10
   5   3   1   72.19    5.60
   5  -3  -1   76.59    6.20
   5  -3  -1   82.79    6.30
   5   3   1   80.29    6.50
   5   3   1   76.99    6.30
   5  -3  -1   68.09    4.90
   5   3   1   81.59    5.80
   5   3   1   70.89    5.70
   6  -3   1  157.98   10.60
   6   3  -1  159.08    9.60
   6   3  -1  152.88    9.10
   6   3  -1  150.38   10.10
   6  -3   1  150.28   10.30
   6  -3   1  147.69    8.70
   6   3  -1  149.69   11.00
   6   3  -1  141.19    9.70
   6  -3  -1  150.58   12.70
   6   3   1  147.99    9.60
   6  -3  -1  144.39    8.70
   6  -3  -1  156.68   10.30
   6   3   1  161.48    9.00
   6   3   1  161.08   10.60
   6   3   1  144.69    9.70
   6   3   1  145.69   11.10
   7   3  -1 1227.88   63.59
   7   3  -1 1260.67   63.99
   7   3  -1 1275.07   64.39
   7  -3   1 1296.97   64.69
   7   3  -1 1247.98   63.59
   7  -3   1 1281.17   62.69
   7  -3   1 1296.77   67.49
   7   3   1 1283.07   63.99
  -7   3  -1 1145.79   66.59
   7  -3  -1 1489.35   65.79
   7  -3  -1 1425.66   64.59
   7  -3  -1 1258.07   62.79
   7   3   1 1359.16   64.69
   8  -3   1   58.79    4.70
   8   3  -1   53.19    4.30
   8   3  -1   57.19    3.80
   8   3  -1   51.99    4.20
   8   3  -1   55.39    4.60
   8  -3   1   51.59    3.60
   8  -3   1   57.99    4.70
   8  -3  -1   56.39    3.80
   8   3   1   50.69    4.70
   8  -3  -1   56.69    4.40
   8   3   1   55.49    4.40
   8   3   1   50.69    4.20
   8   3   1   57.39    3.70
   9   3  -1  379.36   17.90
   9   3  -1  381.96   18.40
   9  -3   1  324.77   18.30
   9   3  -1  355.26   18.40
   9   3   1  372.46   18.50
   9   3   1  387.26   18.50
   0  -4  -1 3003.40  154.58
   0   4   1 3112.59  145.29
   0  -4   1 3032.80  154.68
   1  -4   1 1333.57   72.19
  -1  -4  -1 1294.07   72.99
   1   4  -1 1387.86   64.69
   1   4   1 1380.36   64.19
  -1  -4   1 1263.77   72.89
   1   4   1 1195.78   63.59
   1  -4  -1 1378.36   72.59
  -1   4  -1 1274.37   64.49
   2   4  -1 2006.60   94.99
  -2   4   1 2038.50   93.79
   2  -4   1 1912.81   93.59
   2  -4   1 2150.58  104.19
  -2  -4  -1 1845.52  105.39
   2   4  -1 1835.72   96.19
   2  -4  -1 2142.59  104.29
   2   4   1 1938.01   95.59
   2   4   1 1773.32   95.09
   2  -4  -1 2040.10   93.49
   3  -4   1   10.20    4.10
   3  -4   1    8.40    1.30
   3   4  -1   12.90    2.10
   3   4  -1   11.50    4.50
   3   4  -1    6.70    7.30
   3   4  -1    8.60    2.40
   3   4   1   15.40    7.40
   3   4   1   10.90    2.00
   3  -4  -1   15.80    4.60
   3  -4  -1   12.60    1.30
   4  -4   1  300.17   16.40
   4   4  -1  307.07   18.20
   4   4  -1  312.87   17.60
   4   4  -1  299.77   17.50
   4  -4   1  341.37   16.30
   4  -4   1  301.27   17.80
   4  -4   1  336.17   18.00
   4   4  -1  308.17   17.10
   4   4   1  304.67   24.10
   4   4   1  315.47   17.50
   4   4   1  324.87   17.30
   4   4   1  333.87   18.70
   4   4   1  324.77   17.90
   5  -4   1   92.59    6.90
   5  -4   1   81.29    5.20
   5   4  -1   75.79    7.00
   5   4  -1   86.99    6.50
   5   4  -1   85.59    6.10
   5   4  -1   87.09    5.60
   5   4  -1   87.89    6.60
   5  -4   1   76.49    6.60
   5   4   1   78.59    5.40
   5   4   1   91.19    6.60
   5   4   1   79.59    6.10
   5  -4  -1   80.49    5.20
   5   4   1   78.49    7.40
   5  -4  -1   84.19    6.80
   5   4   1   80.09    6.60
   5  -4  -1   87.59    6.60
   6   4  -1  866.41   43.50
   6  -4   1  897.21   44.60
   6   4  -1  811.92   43.90
   6   4  -1  877.31   42.60
   6   4  -1  817.82   43.80
   6   4  -1  821.22   45.30
   6  -4   1  842.42   42.20
   6  -4   1  843.62   44.60
   6   4   1  884.11   46.10
   6   4   1  892.61   44.00
   6  -4  -1  860.01   42.30
   6   4   1  870.91   42.30
   6  -4  -1  893.51   44.60
   6   4   1  826.32   43.60
   6   4   1  886.61   44.50
   6  -4  -1  931.21   44.30
   7   4  -1  160.28   10.50
   7  -4   1  166.78    9.20
   7   4  -1  160.58   10.50
   7   4  -1  177.38    9.50
   7  -4   1  164.08   10.90
   7   4  -1  164.08   10.10
   7  -4   1  176.68   10.90
   7   4   1  179.78    9.30
  -7   4  -1  165.28   12.50
   7   4   1  156.28   10.80
   7  -4  -1  180.08   10.90
   7  -4  -1  162.38    9.20
   7   4   1  168.18   10.50
   8   4  -1  224.48   12.60
   8  -4   1  244.68   13.10
   8   4   1  220.68   12.50
   8   4   1  227.18   12.60
   8   4   1  192.38   13.10
   8   4   1  240.88   12.10
   8  -4  -1  229.38   11.70
   8  -4  -1  242.48   12.70
   0  -5  -1 3534.15  182.68
   0  -5   1 3591.94  182.88
  -1  -5  -1  355.46   29.00
   1   5  -1  331.37   18.30
  -1   5   1  334.07   19.50
   1   5  -1  368.76   20.00
   1  -5   1  356.46   27.70
  -1   5   1  343.17   17.90
  -1  -5   1  325.37   28.20
   1   5   1  393.06   19.70
   1  -5  -1  352.16   27.80
   1   5   1  324.77   18.60
  -1   5  -1  370.86   19.90
   2  -5   1  467.05   23.80
   2  -5   1  532.25   35.50
   2   5  -1  442.46   26.80
  -2   5   1  482.75   23.90
   2   5  -1  455.95   25.10
   2  -5  -1  511.25   35.20
   2  -5  -1  518.05   23.70
  -2   5  -1  484.85   26.70
   2   5   1  482.45   25.50
   2   5   1  459.85   26.20
   3  -5   1  318.47   17.50
   3   5  -1  290.67   17.40
   3   5  -1  295.07   19.20
   3  -5   1  322.97   15.90
   3   5  -1  282.27   16.50
   3   5  -1  337.37   25.70
   3  -5   1  326.67   26.10
  -3   5  -1  330.37   19.70
   3   5   1  284.27   17.20
   3  -5  -1  344.17   26.80
   3   5   1  309.97   17.90
  -3  -5   1  291.57   16.00
   4   5  -1  734.23   44.10
  -4  -5  -1  639.04   33.30
   4  -5   1  641.24   32.90
   4   5  -1  640.44   34.80
   4   5  -1  649.54   34.20
   4   5  -1  617.84   34.30
   4   5  -1  626.14   35.90
   4  -5   1  631.94   35.10
   4  -5   1  763.72   35.40
   4  -5  -1  716.03   44.50
   4   5   1  772.22   43.30
  -4   5  -1  640.84   36.90
   4   5   1  708.33   36.20
   4   5   1  659.43   34.80
  -4  -5   1  663.83   33.40
   4   5   1  698.43   34.50
   4   5   1  676.53   34.90
   4  -5  -1  654.83   35.10
   4  -5  -1  683.43   36.80
   5   5  -1  482.75   30.80
   5   5  -1  540.35   28.40
   5  -5   1  602.04   29.40
   5  -5   1  544.75   26.80
   5   5  -1  567.64   30.10
   5   5  -1  535.35   28.80
   5  -5   1  547.65   29.40
   5   5  -1  550.44   28.30
   5  -5  -1  534.95   32.10
   5  -5  -1  517.05   29.20
   5   5   1  532.75   28.70
   5  -5  -1  530.05   26.80
   5   5   1  554.34   30.40
   5   5   1  545.55   28.80
  -5   5  -1  518.85   31.00
   5   5   1  548.15   28.40
   6   5  -1  598.44   30.70
   6  -5   1  594.24   31.20
  -6   5   1  574.64   33.40
   6  -5   1  560.54   28.60
   6  -5   1  646.14   31.40
   6   5  -1  572.04   29.90
   6   5  -1  587.74   32.50
   6   5   1  561.84   32.30
  -6   5  -1  580.94   33.20
   6  -5  -1  582.74   28.70
   6   5   1  573.54   30.30
   6   5   1  510.75   30.20
   6  -5  -1  583.74   31.00
   6   5   1  588.64   30.60
  -7   5   1   97.69    8.90
   7  -5   1   87.99    6.70
   7   5  -1  102.19    7.00
   7  -5   1   98.29    7.30
   7   5  -1   91.39    6.50
   7   5  -1  102.09    6.60
   7  -5  -1  103.99    5.70
   7   5   1  101.59    6.90
  -7   5  -1  100.19   10.30
   7  -5  -1  111.19    7.30
   7   5   1   89.09    6.60
   7   5   1   94.49    6.90
   8   5  -1   25.40    2.50
   8   5  -1   31.00    2.40
   8  -5   1   27.20    2.60
   8  -5  -1   32.70    2.60
   8   5   1   27.10    2.40
   8   5   1   29.30    2.60
   8   5   1   25.00    2.40
   0   6  -1   16.40    2.00
   0   6  -1   16.90    2.90
   0  -6  -1   11.30    2.10
   0   6   1   18.10    2.40
   0  -6  -1   16.40    7.50
   0   6   1   21.20    3.20
   0  -6   1   13.60    6.40
   0  -6   1   13.00    1.90
   1   6  -1   88.29    6.00
  -1  -6  -1   84.49    5.40
   1  -6   1   86.19    5.30
  -1  -6  -1   97.39   15.20
  -1   6   1   85.99    7.20
   1   6  -1   97.19    8.10
   1  -6   1   99.39   14.50
  -1  -6   1   81.69   14.90
  -1  -6   1   84.79    5.30
   1  -6  -1   75.69    6.10
   1   6   1   75.59    6.00
   1  -6  -1   93.79   14.30
  -1   6  -1   77.99    7.20
   2  -6   1   29.50    2.40
   2   6  -1   32.10    5.10
  -2  -6  -1   30.90    2.60
  -2   6   1   26.40    3.80
   2   6  -1   32.10    3.50
   2  -6   1   30.90    2.60
   2   6   1   21.20    4.40
   2   6   1   29.50    3.60
   2  -6  -1   26.30    2.50
  -2   6  -1   29.50    4.00
  -2  -6   1   27.10    2.50
   2  -6  -1   28.60    2.50
   2  -6  -1   32.70   10.00
  -3  -6  -1   22.60    2.10
   3   6  -1   19.10    2.40
   3   6  -1   16.30    4.20
   3  -6   1   16.20    6.80
   3   6  -1   19.10    3.00
   3  -6   1   17.30    2.60
  -3   6   1   24.40    3.80
   3   6   1   14.10    2.50
  -3   6  -1   23.50    3.90
   3   6   1   15.00    4.60
   3  -6  -1   14.30    6.80
   3   6   1   17.10    2.40
  -3  -6   1   15.90    2.00
   3  -6  -1   17.10    2.80
   4   6  -1  436.16   32.60
   4   6  -1  405.36   22.90
   4   6  -1  426.66   23.70
  -4  -6  -1  420.56   21.30
   4  -6   1  454.75   23.20
   4   6  -1  385.06   22.00
  -4   6   1  399.56   25.20
   4  -6   1  400.56   23.10
   4   6   1  411.56   22.90
   4   6   1  375.86   22.10
  -4   6  -1  423.76   25.40
  -4  -6   1  408.06   21.30
   4  -6  -1  401.96   23.10
   4   6   1  407.76   23.90
   4  -6  -1  449.56   22.80
   4  -6  -1  403.46   32.60
   4   6   1  458.65   32.40
   5   6  -1    5.90    1.60
  -5   6   1    2.90    2.10
   5   6  -1    5.10    1.60
   5   6  -1  -11.80   12.30
   5   6  -1    6.10    3.20
   5  -6   1    7.70    2.10
   5   6  -1    8.20    2.30
   5   6  -1    1.40    4.00
  -5  -6  -1    9.90    1.60
   5  -6   1    2.80    1.30
  -5  -6   1    3.90    1.10
   5  -6  -1    6.60    2.20
  -5   6  -1    2.80    2.20
   5   6   1    5.50    1.60
  -6   6   1  279.37   17.90
   6   6  -1  257.47   14.50
   6  -6   1  258.67   15.60
   6   6  -1  262.97   15.20
   6   6  -1  267.57   14.40
   6  -6   1  269.07   15.00
   6  -6  -1  254.87   15.40
   6   6   1  248.78   14.70
  -6  -6   1  240.38   13.60
  -6   6  -1  258.57   17.40
   6   6   1  256.27   14.70
   6   6   1  269.27   15.20
   7   6  -1  203.98   11.20
   7  -6   1  192.68   12.70
   7   6  -1  199.08   11.70
   7   6   1  206.28   11.80
   7   6   1  203.08   11.30
   7   6   1  207.58   11.80
   7  -6  -1  215.08   11.90
   8  -6   1   41.40    3.00
   8   6  -1   43.90    2.70
   8   6  -1   41.40    3.10
   8   6   1   42.10    3.50
   8   6   1   46.30    2.90
   0  -7  -1   26.50    2.40
   0  -7  -1   29.30   11.30
   0  -7   1   20.40    2.20
   0  -7   1   17.20    9.20
   1  -7   1  198.68   23.20
  -1   7   1  232.58   14.50
   1  -7   1  198.38   11.20
  -1  -7  -1  198.48   11.40
   1   7  -1  222.98   15.30
   1  -7  -1  202.88   11.30
   1   7   1  197.68   12.50
   1  -7  -1  220.48   25.20
  -1  -7   1  200.88   11.40
   1   7   1  215.08   14.60
   2   7  -1   50.19    6.50
   2  -7   1   50.09   11.50
  -2   7   1   41.80    6.40
   2  -7   1   46.50    3.80
   2   7  -1   41.40    6.50
  -2  -7  -1   46.10    3.60
   2   7  -1   49.90   20.30
   2   7  -1   44.50    3.90
  -2   7  -1   48.10    6.90
   2   7   1   53.09    5.20
   2  -7  -1   46.50   11.20
   2  -7  -1   44.00    3.40
  -2  -7   1   45.10    3.60
   3   7  -1  823.82   42.80
  -3  -7  -1  840.12   40.90
   3  -7   1  886.21   42.50
   3   7  -1  785.12   41.40
  -3   7   1  771.72   44.30
   3   7   1  963.50   77.99
  -3  -7   1  807.42   40.90
   3   7   1  780.12   41.60
   3  -7  -1  887.21   42.10
   3   7   1  780.32   42.40
   3  -7  -1  842.72   57.89
   3   7   1  814.52   43.30
  -4  -7  -1  202.38   10.90
   4  -7   1  215.88   12.30
   4  -7   1  186.58   12.60
   4   7  -1  185.48   12.20
   4   7  -1  207.88   21.60
   4   7  -1  184.28   13.00
  -4   7   1  194.78   14.10
   4   7  -1  181.08   11.40
   4   7   1  217.38   21.10
  -4   7  -1  204.78   14.50
   4   7   1  191.28   12.20
   4   7   1  185.18   11.60
   4  -7  -1  182.28   12.40
  -4  -7   1  191.08   10.90
   4   7   1  171.98   13.00
   5  -7   1   58.09    5.50
  -5   7   1   60.39    6.70
  -5  -7  -1   64.09    4.30
   5   7  -1   61.79    5.30
   5   7  -1   52.09    4.50
   5  -7   1   55.99    4.90
   5   7   1   56.79    4.90
  -5   7  -1   54.79    6.60
   5   7   1   55.19    4.80
   5  -7  -1   53.19    5.30
   5   7   1   60.39    5.30
  -5  -7   1   62.89    4.30
   6   7  -1   59.99    4.50
  -6  -7  -1   62.29    4.00
   6   7  -1   63.69    5.10
   6  -7   1   61.59    5.30
  -6   7   1   63.39    6.80
  -6  -7   1   61.19    4.00
   6  -7  -1   60.69    5.10
  -6   7  -1   61.29    6.60
   6   7   1   65.49    5.00
   6   7   1   58.49    4.60
   7   7  -1   86.79    5.00
   7   7  -1   89.99    5.70
   7   7   1   94.29    5.70
   7   7   1   85.89    5.20
   7  -7  -1   80.39    5.50
   0  -8   1   82.19    5.40
   0   8   1   77.09    8.20
   0   8  -1   84.59    8.70
   0  -8  -1   79.79    5.40
   1  -8   1  212.38   12.10
   1  -8   1  230.58   12.70
   1   8  -1  208.08   16.40
  -1  -8  -1  210.28   12.30
   1   8  -1  264.67   29.00
  -1   8   1  248.98   15.80
  -1  -8   1  217.38   12.30
   1  -8  -1  231.78   28.50
   1  -8  -1  222.58   12.20
  -1   8  -1  229.78   15.80
   2  -8   1  188.78   10.00
  -2  -8  -1  191.58   10.60
   2   8  -1  216.88   24.60
   2   8  -1  169.28   10.70
   2   8   1  173.08   10.90
  -2  -8   1  178.58   10.50
   2  -8  -1  189.88   10.10
   2  -8  -1  184.58   24.40
   2   8   1  205.78   24.20
  -3  -8  -1   37.60    3.40
  -3   8   1   44.30    5.50
   3   8  -1   44.30   13.70
   3  -8   1   45.70    4.80
   3   8  -1   40.90    4.70
   3  -8   1   39.10    4.10
   3   8   1   37.90    4.00
  -3   8  -1   42.80    5.60
  -3  -8   1   43.90    3.50
   3   8   1   43.60   12.30
   4   8  -1   91.99    7.10
   4   8  -1   83.79    6.10
   4  -8   1  101.59    7.80
   4  -8   1   98.19    6.70
  -4   8   1   90.59    8.50
  -4  -8  -1   93.29    6.00
   4   8   1   91.69    6.40
  -4   8  -1   92.89    8.60
   4   8   1   89.19    7.00
   4  -8  -1  106.29    7.80
  -4  -8   1   91.99    6.00
   5   8  -1  179.68   11.00
   5  -8   1  175.68   11.30
  -5   8   1  177.48   12.90
  -5   8  -1  182.18   13.10
   5   8   1  171.08   10.30
   5   8   1  183.78   10.90
   5  -8  -1  184.48   11.20
  -5  -8   1  184.98   10.00
   6   8  -1   37.90    3.30
   6   8  -1   38.80    2.70
  -6  -8  -1   38.40    2.60
   6  -8   1   41.20    3.50
   6   8   1   37.20    2.90
   6  -8  -1   45.40    3.50
  -6  -8   1   39.50    2.60
   6   8   1   40.30    3.30
   0  -9  -1  208.88   11.40
   0  -9   1  204.18   11.30
   0   9  -1  208.98   15.90
   1   9  -1  226.68   12.20
  -1   9   1  214.68   15.60
  -1  -9  -1  214.68   12.00
   1  -9  -1  221.68   11.80
  -1  -9   1  219.08   12.10
   1   9   1  221.28   12.40
  -1   9  -1  224.88   16.00
  -2  -9  -1   25.70    2.50
   2   9  -1   30.70    2.80
  -2   9   1   23.00    4.80
   2  -9   1   30.10    3.10
  -2  -9   1   28.50    2.60
  -2   9  -1   30.00    5.10
   2   9   1   29.70    2.80
   2  -9  -1   21.90    2.00
   3  -9   1   32.20    3.10
   3  -9   1   40.70    4.30
  -3  -9  -1   33.70    2.90
   3   9  -1   38.00    3.70
   3   9  -1   35.60    3.00
  -3   9   1   30.40    4.80
   3   9   1   33.10    3.60
  -3   9  -1   28.20    5.20
   3   9   1   30.30    3.00
   3  -9  -1   35.30    3.90
  -3  -9   1   30.60    2.80
   4  -9   1  114.19    7.90
   4   9  -1  116.59    7.70
   4   9  -1  112.09    6.90
   4   9   1  113.19    7.00
   4  -9  -1  117.59    7.90
  -4  -9   1  114.29    7.10
   4   9   1  122.09    7.70
   5  -9   1    1.00    0.60
   5   9  -1    1.50    0.90
  -5  -9  -1    1.80    0.50
   5  -9  -1    2.40    0.90
  -5  -9   1    1.90    0.60
   5   9   1    1.20    0.80
   5   9   1    1.70    0.80
   0  10   1  156.38    8.90
   0 -10  -1  167.08    8.80
   0  10  -1  154.38    9.30
   0 -10   1  164.98    8.80
   1 -10   1   89.89    4.90
   1 -10   1   91.59    5.80
   1  10  -1   81.29    5.10
  -1 -10  -1   89.59    5.40
  -1 -10   1   91.89    5.30
   1 -10  -1   88.39    4.90
  -1  10  -1   81.29    5.00
   1  10   1   84.29    5.40
   2 -10   1   25.40    3.20
  -2 -10  -1   22.60    2.40
   2  10   1   20.70    2.10
   2  10   1   26.80    3.00
   2 -10  -1   23.80    3.20
  -2 -10   1   22.30    2.60
   3 -10   1   34.50    3.40
   3  10  -1   37.60    3.20
  -3 -10  -1   38.30    2.70
   3  10   1   33.00    2.70
  -3 -10   1   37.90    2.70
   3 -10  -1   32.10    3.20
   3  10   1   34.00    3.10
  -4 -10  -1   29.30    2.20
   4 -10   1   25.50    2.40
   4  10  -1   28.50    2.50
   4 -10  -1   24.50    2.40
  -4 -10   1   29.00    2.10
   4  10   1   29.50    2.50
   0 -11   1    0.70    0.40
   0  11  -1    0.60    0.50
   0  11   1    0.50    0.50
   1  11  -1  148.59    8.10
  -1 -11  -1  145.39    7.30
   1 -11   1  150.18    8.20
   1 -11  -1  132.59    8.10
  -1 -11   1  140.09    7.30
   1  11   1  142.29    8.80
   0   0  -2   86.99    4.10
   0   0  -2   79.99    5.90
  -1   0   2 1435.26   70.09
   1   0   2 1603.84   70.49
   1   0   2 1570.24   71.49
   1   0  -2 1317.17   72.49
   2   0  -2 1449.35   77.89
   2   0   2 1617.54   75.29
   2   0   2 1677.83   75.79
   3   0  -2  414.96   25.00
   3   0   2  479.25   22.90
   3   0  -2  493.85   23.50
   4   0   2   29.40    3.00
   4   0  -2   34.30    2.00
   4   0   2   27.40    2.60
   5   0   2  324.07   16.20
   5   0   2  298.87   15.80
   5   0   2  281.57   16.00
   5   0  -2  297.27   16.00
   5   0   2  295.97   16.70
   5   0  -2  308.87   16.00
   5   0  -2  271.17   16.00
   5   0  -2  293.97   16.80
   5   0   2  302.57   17.10
   5   0   2  307.37   17.50
   5   0   2  320.17   16.20
   6   0   2 1756.92   84.59
   6   0  -2 1760.82   82.99
   6   0   2 1820.62   84.09
   6   0  -2 1796.22   83.99
   6   0   2 1635.34   82.09
   6   0  -2 1686.83   82.39
   6   0   2 1764.72   82.69
   6   0  -2 1618.84   83.39
   6   0   2 1718.73   82.79
   6   0  -2 1604.24   82.49
   6   0   2 1638.04   83.29
   6   0   2 1622.14   82.49
   7   0   2    3.20    1.40
   7   0  -2    2.40    1.00
   7   0  -2    3.70    1.50
   7   0  -2    1.30    1.00
   7   0   2    0.50    0.90
   7   0   2    1.10    0.90
   7   0  -2    2.00    1.20
   7   0  -2    2.20    1.10
   7   0  -2    0.10    0.80
   8   0  -2  135.69    8.10
   8   0   2  110.49    8.80
   8   0   2  127.99    8.10
   8   0   2  127.29    7.60
   8   0   2  137.09    9.00
   8   0   2  130.29    7.80
   8   0   2  130.89    8.60
   8   0  -2  126.49    7.70
   8   0  -2  124.59    8.00
   8   0  -2  130.69    7.80
   9   0   2   -0.10    0.50
   9   0  -2    1.00    0.50
   2  -1   2 1422.26   63.39
   2   1  -2 1361.66   63.89
  -2   1   2 1204.08   62.79
   2   1  -2 1349.56   67.09
   2   1  -2 1344.67   66.59
   2  -1   2 1313.37   63.19
   2   1   2 1175.58   64.79
   2  -1  -2 1336.17   66.99
   2  -1  -2 1368.46   62.89
   2   1   2 1408.56   63.49
   3   1  -2 3093.99  142.69
   3   1  -2 2637.14  141.89
   3  -1  -2 2907.51  138.39
   3  -1  -2 3058.09  142.59
   4  -1   2  264.77   13.70
   4  -1   2  279.87   14.10
   4   1  -2  251.67   14.60
   4   1  -2  232.58   14.40
   4   1   2  252.97   14.70
   4  -1  -2  287.37   15.40
   4   1   2  253.47   13.80
   5  -1   2   85.89    6.20
   5   1  -2   70.29    5.60
   5  -1   2   72.69    5.70
   5   1  -2   75.99    6.00
   5  -1   2   72.89    5.10
   5   1  -2   75.89    6.00
   5  -1   2   64.09    5.80
   5   1  -2   66.39    5.00
   5  -1   2   76.49    5.80
   5  -1   2   76.69    5.10
   5   1  -2   69.49    5.30
   5  -1   2   72.29    5.20
   5   1   2   76.89    5.30
   5  -1  -2   66.19    5.00
   5   1   2   67.49    5.30
   5  -1  -2   73.59    5.60
   5   1   2   75.79    6.10
   5   1   2   73.29    5.50
   5   1   2   75.69    6.20
   5  -1  -2   62.59    4.90
   5   1   2   74.79    5.40
   5   1   2   72.69    4.90
   6   1  -2  948.31   46.30
   6  -1   2  901.11   46.90
   6   1  -2  887.41   46.20
   6   1  -2 1016.10   47.50
   6  -1   2  934.31   46.00
   6  -1   2  976.30   47.20
   6  -1   2  969.70   46.00
   6   1  -2  912.61   46.90
   6  -1   2  899.91   45.50
   6   1  -2  869.01   45.80
   6   1  -2  943.01   46.10
   6  -1   2  903.51   45.70
   6  -1   2  932.61   47.80
   6   1   2  909.51   47.70
   6   1   2  890.01   45.50
   6  -1  -2  881.71   45.70
   6   1   2  923.21   46.20
   6  -1  -2  899.51   46.70
   6   1   2  911.71   46.60
   6  -1  -2  957.30   46.70
   6  -1  -2  930.61   45.90
   6  -1  -2  999.30   47.40
   6   1   2  943.41   48.00
   6   1   2  967.40   47.60
   6   1   2  880.51   46.10
   6  -1  -2  899.01   45.70
   7  -1   2  522.65   27.10
   7  -1   2  521.45   27.50
   7   1  -2  508.05   27.50
   7  -1   2  505.95   28.30
   7   1  -2  561.84   27.90
   7   1  -2  510.35   27.30
   7  -1   2  553.24   27.30
   7   1  -2  518.05   27.70
   7   1  -2  540.35   28.70
   7  -1   2  508.55   28.40
   7  -1   2  578.04   29.80
   7   1   2  536.45   27.80
   7  -1  -2  571.14   28.20
   7  -1  -2  544.05   27.40
   7   1   2  525.05   27.10
   7   1   2  510.85   28.20
   7  -1  -2  533.05   27.30
   7   1   2  523.25   27.70
   7   1   2  547.75   29.50
   7  -1  -2  584.44   28.80
   7  -1  -2  499.85   27.50
   7   1   2  553.34   29.60
   8  -1   2   62.29    5.10
   8   1  -2   60.79    4.60
   8   1  -2   58.19    4.30
   8   1  -2   56.59    4.60
   8  -1   2   59.19    5.50
   8  -1   2   56.99    4.20
   8  -1   2   68.49    4.50
   8  -1  -2   61.39    4.60
   8  -1  -2   67.29    4.40
   8   1   2   56.19    5.30
   8   1   2   59.89    4.20
   8   1   2   60.39    4.80
   8  -1  -2   54.39    4.20
   8   1   2   60.69    5.00
   8   1   2   65.99    4.60
   8   1   2   62.59    5.60
   9  -1   2  109.79    6.00
   9  -1   2  100.49    6.90
   9   1  -2  106.59    6.10
   9   1  -2  111.39    6.20
   9   1   2  111.39    6.20
   9  -1  -2  101.09    6.00
   9   1   2  106.19    5.90
   0  -2   2  195.18    9.70
   0   2  -2  192.88   10.50
   0  -2   2  187.08   13.50
   0  -2  -2  183.78   13.60
   0   2  -2  215.18    9.60
   0   2   2  190.78   10.00
   1   2  -2  335.87   16.70
  -1  -2  -2  303.77   20.50
   1   2  -2  337.97   17.60
   1  -2   2  340.07   20.40
   1   2   2  348.37   16.60
  -1   2  -2  341.07   17.30
   1   2   2  341.97   17.10
   1  -2  -2  325.67   20.80
   2   2  -2  151.88   11.20
   2   2  -2  129.09   11.50
   2  -2   2  136.99    7.30
   2   2  -2  140.79    8.00
   2  -2   2  136.19   10.40
   2   2  -2  124.59    8.90
   2   2   2  158.78    9.00
   2  -2  -2  136.99    6.90
   2   2   2  155.28    8.00
   2  -2  -2  154.98   11.70
   2   2   2  130.49   10.90
   3  -2   2 4974.70  237.18
   3   2   2 4636.04  240.28
   3  -2  -2 5416.96  236.58
   4   2  -2 1770.72   83.39
   4   2  -2 1514.25   86.49
   4   2  -2 1580.64   85.29
   4  -2   2 1851.11   81.79
   4  -2  -2 1839.72   86.39
   4   2   2 1659.33   82.09
   5   2  -2  208.98   12.60
   5   2  -2  235.68   13.50
   5   2  -2  224.68   12.80
   5   2  -2  245.58   13.00
   5  -2   2  221.68   12.30
   5  -2   2  231.98   13.70
   5   2  -2  230.68   14.30
   5  -2   2  245.68   13.40
   5  -2   2  219.88   12.20
   5   2  -2  219.18   13.80
   5   2  -2  211.08   13.00
   5  -2   2  252.47   12.70
   5  -2   2  243.98   12.50
   5  -2  -2  233.58   13.20
   5  -2  -2  240.98   12.60
   5   2   2  230.08   13.00
   5   2   2  230.48   14.00
   5  -2  -2  232.48   13.40
   5  -2  -2  212.18   12.30
   5   2   2  199.58   13.90
   5   2   2  217.78   12.30
   5   2   2  241.28   14.00
   5   2   2  223.18   13.00
   5  -2  -2  216.78   12.30
   5   2   2  217.68   12.90
   6  -2   2  316.77   16.30
   6  -2   2  315.67   16.40
   6   2  -2  289.47   17.40
   6   2  -2  279.17   17.00
   6  -2   2  282.97   17.10
   6  -2   2  282.77   17.90
   6  -2   2  308.07   17.50
   6   2  -2  329.07   17.00
   6  -2   2  304.27   18.60
   6   2  -2  307.57   18.50
   6   2   2  329.57   18.30
   6  -2  -2  339.87   17.60
   6  -2  -2  271.37   17.50
   6  -2  -2  307.47   17.10
   6  -2  -2  340.67   17.90
   6   2   2  327.77   16.70
   6   2   2  271.37   18.40
   6   2   2  261.57   20.30
   6  -2  -2  302.37   16.50
   6   2   2  303.07   17.20
   6   2   2  324.57   17.20
   7  -2   2  259.77   15.50
   7   2  -2  256.57   14.30
   7  -2   2  274.87   14.10
   7   2  -2  251.07   14.80
   7   2  -2  254.77   15.30
   7  -2   2  252.77   16.00
   7  -2   2  254.17   13.90
   7   2  -2  234.28   14.40
   7   2   2  250.57   15.90
   7  -2  -2  249.18   14.00
   7   2   2  295.77   15.70
  -7   2  -2  254.47   16.70
   7   2   2  255.07   13.90
   7  -2  -2  278.27   15.30
   7  -2  -2  271.47   15.10
   7  -2  -2  270.87   14.10
   7   2   2  264.57   15.20
   7   2   2  244.28   16.00
   7   2   2  237.38   14.60
   8   2  -2   68.59    4.80
   8   2  -2   67.39    5.00
   8   2  -2   70.29    5.20
   8  -2   2   70.99    5.60
   8  -2   2   66.99    4.60
   8  -2   2   75.89    6.00
   8   2   2   72.89    4.60
   8  -2  -2   66.39    5.00
   8   2   2   67.59    6.20
   8   2   2   71.49    5.10
   8  -2  -2   81.49    4.90
   9  -2   2  218.88   12.80
   9   2  -2  251.47   12.70
   9   2  -2  234.58   12.50
   9  -2   2  244.38   12.40
   9   2   2  260.97   13.00
   9  -2  -2  243.98   12.30
   9   2   2  246.28   12.60
   9   2   2  242.18   12.20
   0   3  -2 3212.18  153.48
   0  -3  -2 3302.97  161.28
   0  -3   2 3214.68  160.78
   0   3   2 3235.98  153.98
  -1  -3  -2  523.15   33.90
   1  -3   2  616.04   34.10
   1   3  -2  547.45   27.60
   1   3  -2  583.54   28.90
   1   3   2  611.54   27.90
   1   3   2  533.65   28.10
   1  -3  -2  563.34   33.90
  -1   3  -2  578.14   28.60
  -1  -3   2  501.35   33.70
   2  -3   2  177.38   13.60
   2   3  -2  136.09    9.70
   2   3  -2  160.78   13.00
   2   3  -2  152.58    8.60
   2  -3  -2  150.48   13.20
   2   3   2  150.28    9.20
   2   3   2  145.99   13.80
   2   3   2  133.09    8.50
   3  -3   2  326.27   16.00
   3   3  -2  318.97   17.20
   3   3  -2  313.97   23.40
   3   3  -2  361.76   22.70
   3   3  -2  291.47   18.50
   3   3   2  288.27   21.70
   3   3   2  309.67   17.70
   3  -3  -2  330.77   22.60
   4   3  -2  286.47   22.50
   4   3  -2  287.67   16.40
   4   3  -2  275.87   20.10
   4  -3   2  297.97   14.80
   4   3   2  244.58   16.90
   4  -3  -2  314.97   20.90
   4   3   2  248.68   17.50
   4   3   2  329.77   17.60
   4   3   2  301.17   16.90
   4   3   2  250.47   17.80
   5  -3   2  642.84   31.00
   5  -3   2  616.24   32.60
   5  -3   2  594.24   30.60
   5   3  -2  602.74   31.50
   5  -3   2  643.84   32.80
   5  -3   2  654.33   30.80
   5  -3   2  703.03   31.80
   5   3  -2  623.84   32.10
   5   3  -2  578.94   31.80
   5   3  -2  567.74   31.00
   5   3   2  590.24   31.70
   5  -3  -2  635.24   30.70
   5   3   2  607.74   33.40
   5   3   2  612.64   31.80
   5   3   2  617.34   32.80
   5   3   2  621.04   32.70
   5   3   2  610.94   31.70
   5  -3  -2  564.04   30.70
   5  -3  -2  660.23   32.30
   5  -3  -2  633.34   32.40
   5   3   2  592.14   30.70
   6  -3   2   10.50    2.40
   6  -3   2    7.60    2.20
   6   3  -2   10.30    1.80
   6   3  -2   10.80    2.10
   6  -3   2   12.40    1.70
   6   3  -2    9.30    1.80
   6   3   2   11.30    2.40
   6  -3  -2    7.10    2.40
   6   3   2   11.70    2.00
   6   3   2    7.20    2.90
   6  -3  -2    8.00    1.90
   6   3   2   10.70    2.00
   6   3   2   12.80    2.50
   6  -3  -2    8.90    1.60
   7  -3   2    8.10    2.20
   7   3  -2    8.70    1.70
   7  -3   2    6.00    2.80
   7   3  -2    9.70    2.10
   7   3  -2    8.50    2.10
   7  -3   2    8.50    1.40
   7  -3  -2    7.00    2.40
   7   3   2    6.90    1.70
   7   3   2   10.00    2.20
   7   3   2   10.30    2.20
  -7   3  -2    5.60    3.40
   7   3   2    6.40    1.70
   7  -3  -2   10.00    1.80
   8  -3   2   45.90    3.20
   8  -3   2   45.70    4.20
   8  -3   2   48.80    4.50
   8   3  -2   41.00    3.70
   8   3  -2   45.30    3.40
   8   3  -2   47.70    3.70
   8   3   2   43.50    4.30
   8   3   2   42.60    3.70
   8  -3  -2   49.20    3.80
   8   3   2   43.50    3.90
   8  -3  -2   51.79    3.40
   9   3  -2  104.99    5.40
   9  -3   2  102.99    6.00
   9   3  -2   96.19    5.80
   9  -3  -2  109.39    5.90
   9   3   2  106.59    5.80
   9   3   2   97.19    5.90
   0   4   2  425.06   23.60
   0  -4   2  458.75   31.50
   0   4  -2  496.15   24.70
   0  -4  -2  489.65   32.10
   0   4  -2  467.35   22.90
   0   4   2  469.25   24.10
   1   4  -2  336.07   17.30
   1   4  -2  364.86   18.90
   1  -4   2  355.66   25.10
  -1  -4  -2  317.57   25.20
  -1   4   2  307.27   17.00
  -1   4  -2  339.77   18.60
   1   4   2  369.76   17.90
   1  -4  -2  353.06   25.20
   1   4   2  286.47   17.60
   2   4  -2   61.59    4.50
   2   4  -2   49.60    5.30
   2  -4   2   52.99    3.60
   2  -4   2   72.29    9.40
   2   4   2   48.70   11.30
  -2   4  -2   62.09    5.40
   2  -4  -2   65.79    9.20
   2   4   2   59.89    4.80
   2   4   2   50.89    4.50
   2  -4  -2   60.59    3.30
   3  -4   2  607.34   29.90
   3   4  -2  687.53   39.40
   3  -4   2  614.14   38.40
   3   4  -2  592.94   31.40
   3   4  -2  554.74   33.10
   3   4   2  578.84   40.20
   3  -4  -2  664.23   39.80
   3   4   2  551.24   31.60
   3  -4  -2  635.04   29.10
   4  -4   2 1257.07   64.19
   4  -4   2 1369.86   66.39
   4   4  -2 1253.07   65.69
   4  -4   2 1333.07   66.29
   4  -4   2 1489.35   64.69
   4   4  -2 1454.15   78.79
   4   4  -2 1460.65   65.49
   4  -4  -2 1278.77   77.49
   4   4   2 1288.37   65.39
   4   4   2 1270.77   72.29
   4   4   2 1380.96   67.29
   4   4   2 1312.07   66.39
   4   4   2 1297.37   65.59
   4  -4  -2 1259.27   69.69
   5   4  -2   91.69    6.50
   5  -4   2   92.19    7.40
   5   4  -2   89.59    7.60
   5  -4   2   93.89    5.60
   5   4  -2   76.29    8.00
   5   4  -2   84.49    8.90
   5   4  -2  102.39    7.00
   5   4  -2   92.79    6.10
   5  -4   2   92.29    7.30
   5  -4  -2   99.49    7.30
   5   4   2   92.39    8.00
   5   4   2   92.59    6.80
   5   4   2   93.59    7.30
   5   4   2   91.09    6.70
   5  -4  -2   89.19    5.70
   5   4   2   96.79    5.80
   6  -4   2  714.03   39.80
   6   4  -2  784.62   38.70
   6  -4   2  770.22   37.60
   6   4  -2  797.72   38.10
   6   4  -2  730.13   39.20
   6  -4   2  819.82   40.30
   6   4   2  780.72   39.20
   6   4   2  774.32   39.20
   6  -4  -2  798.12   39.80
   6   4   2  732.63   39.80
   6   4   2  760.42   41.40
   6   4   2  790.52   37.60
   6  -4  -2  749.62   37.60
  -6   4  -2  705.43   41.30
   7  -4   2   12.60    1.60
   7   4  -2   12.20    2.50
   7  -4   2   13.10    2.40
   7   4  -2   12.40    2.00
   7   4  -2   13.40    1.70
   7   4  -2   12.70    1.90
   7  -4   2   13.00    2.40
   7   4   2   12.40    2.30
   7   4   2   12.00    2.10
   7   4   2   11.70    1.60
   7  -4  -2   16.50    1.70
   7  -4  -2   13.40    2.30
   7   4   2   14.60    2.30
  -7   4  -2   10.50    3.50
   8   4  -2   22.10    2.20
   8   4  -2   23.10    1.90
   8   4  -2   21.00    2.40
   8  -4   2   19.70    2.50
   8  -4   2   20.00    2.50
   8   4   2   20.20    2.70
   8   4   2   20.70    2.30
   8  -4  -2   21.20    2.20
   8   4   2   20.40    2.30
   8  -4  -2   22.10    1.80
   0  -5   2   52.29    9.80
   0  -5  -2   53.69    9.50
   0   5  -2   61.69    3.60
   0   5   2   50.39    4.20
   0   5  -2   56.49    5.10
   0   5   2   58.39    4.80
   1   5  -2 1137.19   57.19
  -1   5   2 1101.29   56.49
   1  -5   2 1143.69   66.89
  -1  -5  -2 1128.29   68.49
  -1   5   2 1181.98   55.09
   1  -5  -2 1193.98   67.59
  -1  -5   2 1061.29   67.59
  -1   5  -2 1097.29   56.89
   2   5  -2  451.65   23.00
   2  -5   2  445.46   32.50
   2   5  -2  414.96   25.10
  -2   5   2  443.06   22.10
   2  -5   2  422.36   21.70
   2   5  -2  473.25   32.50
   2  -5  -2  457.25   33.00
   2   5   2  405.96   23.40
  -2   5  -2  428.16   24.50
   2  -5  -2  462.35   21.40
   2   5   2  404.36   23.50
   3   5  -2  475.05   31.00
   3  -5   2  569.14   27.40
   3   5  -2  522.85   27.80
  -3   5   2  567.64   27.30
   3   5  -2  560.94   41.30
   3   5  -2  562.44   28.90
   3  -5  -2  607.74   39.60
  -3  -5   2  542.05   27.40
   3   5   2  536.35   28.10
   4   5  -2  519.85   27.60
   4  -5   2  500.65   27.40
   4  -5   2  474.55   25.00
  -4  -5  -2  478.05   25.40
   4  -5   2  512.95   27.30
   4   5  -2  504.85   26.40
   4   5  -2  495.35   26.20
   4   5  -2  489.95   26.90
   4   5  -2  530.75   36.10
   4   5   2  509.55   26.50
  -4  -5   2  495.65   25.50
   4   5   2  576.64   34.50
   4  -5  -2  542.05   36.50
   4  -5  -2  516.65   27.30
   4   5   2  516.15   27.20
  -4   5  -2  449.76   28.50
   4   5   2  510.95   26.90
   5  -5   2  375.86   21.40
   5   5  -2  400.66   20.90
   5   5  -2  350.16   20.80
   5   5  -2  376.46   20.20
   5   5  -2  374.66   21.80
   5  -5   2  407.16   21.60
   5  -5   2  372.86   18.90
   5   5  -2  389.76   20.50
   5  -5  -2  386.46   21.40
   5   5   2  372.06   20.50
   5   5   2  363.36   20.70
   5   5   2  377.56   21.20
  -5  -5   2  358.86   19.30
   5  -5  -2  356.86   18.90
  -5   5  -2  356.56   22.80
   6   5  -2 1666.43   83.59
   6  -5   2 1681.43   84.29
   6  -5   2 1820.32   84.69
  -6   5  -2 1684.13   86.29
   6  -5  -2 1744.93   84.09
   6   5   2 1656.63   93.59
   6   5   2 1634.94   83.29
   6   5   2 1699.23   83.49
   6   5   2 1741.63   83.99
   7   5  -2  220.98   13.60
   7  -5   2  239.78   14.20
   7   5  -2  235.08   13.10
   7  -5   2  257.87   14.80
  -7   5   2  239.98   16.30
   7   5  -2  212.78   13.00
   7  -5  -2  262.37   14.00
   7   5   2  242.08   13.70
   7   5   2  240.38   13.90
  -7   5  -2  231.58   16.00
   7   5   2  234.68   13.60
   7  -5  -2  239.68   12.40
   8   5  -2   11.10    1.20
   8  -5   2   11.80    1.60
   8   5  -2   11.40    1.50
   8  -5  -2    9.80    1.40
   8   5   2    8.70    1.30
   8   5   2   10.10    1.40
   8   5   2    7.80    1.50
   0  -6   2  799.92   57.19
   0   6   2  881.91   43.60
   0   6   2 1001.30   45.20
   0  -6   2  781.02   43.60
   0   6  -2  916.71   45.80
   0  -6  -2  810.12   42.80
   0  -6  -2  897.11   58.79
   1   6  -2  109.99    6.40
   1   6  -2   92.69    8.30
  -1   6   2   95.19    6.40
  -1  -6  -2   90.79   16.30
   1  -6   2   80.39    6.90
  -1   6   2  104.39    7.90
   1  -6   2   94.39   14.10
  -1  -6  -2   85.69    5.80
   1  -6  -2   96.09   15.10
   1   6   2   95.39    7.00
  -1   6  -2   99.49    8.00
  -1  -6   2   97.59    5.90
   1  -6  -2   97.19    5.90
   2  -6   2  741.83   51.29
   2  -6   2  781.32   36.60
   2   6  -2  620.24   38.00
   2   6  -2  809.92   52.19
   2   6  -2  730.43   41.00
  -2  -6  -2  763.72   36.70
   2   6  -2  757.32   38.30
  -2   6   2  737.83   39.50
   2  -6   2  752.02   36.40
   2  -6  -2  730.33   36.30
  -2   6  -2  720.63   39.80
  -2  -6   2  764.92   36.70
   2   6   2  752.92   38.60
   3  -6   2  936.01   43.70
  -3   6   2  822.02   46.70
   3   6  -2  803.32   48.00
   3  -6   2  934.91   45.30
   3   6  -2  853.11   44.20
  -3  -6  -2  873.11   43.70
   3   6  -2  916.31   45.40
   3   6  -2  993.30   58.99
   3   6   2  842.22   44.40
   3   6   2  902.11   46.10
   3  -6  -2  948.71   59.29
  -3  -6   2  914.21   43.80
   3   6   2  850.11   44.90
   4   6  -2  110.19    8.20
   4   6  -2  109.49    7.50
  -4  -6  -2  118.39    7.00
   4   6  -2  113.79   15.70
   4   6  -2  119.99    8.90
   4  -6   2  104.79    8.40
  -4   6   2  107.29    9.80
   4  -6   2  122.39    8.60
   4   6   2  113.69    9.40
  -4  -6   2  115.29    7.10
   4  -6  -2  137.29   16.70
   4  -6  -2  123.79    8.70
   4   6   2  112.99    8.20
   4   6   2  107.39    7.80
   4   6   2  115.29    8.10
  -4   6  -2  122.09   10.50
   5   6  -2    9.00    1.90
  -5   6   2    3.50    2.30
   5   6  -2    6.80    1.90
   5   6  -2    5.00    2.40
   5  -6   2    3.50    1.60
   5   6  -2    1.50    4.30
  -5  -6  -2   10.00    1.70
   5   6   2    3.50    2.60
  -5  -6   2    5.90    1.20
  -5   6  -2    7.60    2.90
   5   6   2    6.40    2.10
   5   6   2    6.70    1.90
   5   6   2    9.20    1.90
   5  -6  -2    4.70    1.70
   6  -6   2  181.38   10.40
  -6   6   2  155.48   12.30
   6  -6   2  170.08   11.10
   6   6  -2  149.09   10.00
   6   6  -2  148.89    9.20
   6   6  -2  138.99    8.90
   6   6   2  150.78    9.80
  -6   6  -2  157.98   12.10
   6  -6  -2  166.08   10.40
  -6  -6   2  156.98    8.70
   6   6   2  161.28   10.00
   6   6   2  133.89    9.50
   7   6  -2   26.90    2.80
   7   6  -2   26.80    2.30
   7  -6   2   30.00    3.30
   7  -6  -2   25.70    2.70
   7   6   2   29.30    2.90
   7   6   2   27.00    2.60
   7   6   2   23.80    2.70
   8  -6   2  313.07   16.30
   8   6   2  326.97   16.40
   8   6   2  323.47   16.10
   0  -7  -2  114.29   18.20
   0  -7   2   83.79    5.60
   0   7  -2   88.19    8.30
   0  -7  -2   80.29    5.60
   0   7   2   95.49    7.90
  -1   7   2   24.40    3.80
  -1  -7  -2   23.60    2.40
   1  -7   2   23.60    2.60
   1  -7   2   24.90    2.30
   1   7  -2   30.10   10.70
   1  -7  -2   24.60    2.30
   1  -7  -2   27.60   10.70
  -1   7  -2   31.60    4.50
   1   7   2   23.30    3.90
  -1  -7   2   24.30    2.50
   2   7  -2  884.01   45.40
   2   7  -2  947.51   69.09
   2   7  -2  889.61   50.29
   2  -7   2  928.91   44.70
   2  -7   2 1000.60   45.30
   2  -7  -2  875.91   45.10
   2   7   2  906.51   47.20
  -2   7  -2  878.81   48.70
   2  -7  -2  974.50   64.09
   3   7  -2  196.68   12.40
   3  -7   2  203.68   12.30
   3   7  -2  190.78   11.30
  -3  -7  -2  195.48   10.90
  -3   7   2  197.78   14.00
  -3   7  -2  189.08   14.10
   3   7   2  189.78   12.20
   3   7   2  189.58   13.20
  -3  -7   2  190.58   10.90
   3   7   2  200.58   11.80
  -4   7   2  199.68   14.80
   4   7  -2  196.88   12.00
   4  -7   2  208.28   13.40
   4   7  -2  206.48   13.10
   4   7  -2  213.28   22.60
   4   7  -2  204.28   13.60
   4  -7   2  228.78   13.30
  -4  -7  -2  213.28   11.60
   4  -7  -2  228.88   13.60
  -4   7  -2  214.98   15.10
   4   7   2  196.88   12.20
   4   7   2  199.28   14.20
   4   7   2  228.58   21.50
  -4  -7   2  215.58   11.70
   4  -7  -2  191.18   21.40
   4   7   2  191.98   12.30
   4   7   2  212.78   13.00
  -5  -7  -2   95.89    6.00
   5  -7   2  106.29    7.40
   5   7  -2   94.69    7.20
   5   7  -2   94.89    6.40
  -5   7   2   94.19    8.80
   5  -7   2  107.09    8.10
  -5  -7   2   97.89    6.10
   5   7   2   89.99    6.80
   5   7   2   94.49    6.60
  -5   7  -2   95.49    8.80
   5   7   2   98.09    7.20
   5  -7  -2  100.49    7.50
  -6   7   2  163.98   12.40
   6  -7   2  143.09    9.60
   6   7  -2  139.59    8.40
  -6  -7  -2  137.89    8.80
   6   7  -2  148.49    9.30
  -6   7  -2  177.38   15.90
   6   7   2  154.38    9.30
   6   7   2  129.39    8.60
  -6  -7   2  155.08    8.20
   6  -7  -2  150.98    9.50
   6   7   2  146.89    9.00
   7   7  -2  701.33   35.60
   7   7  -2  693.33   34.80
   7  -7   2  719.93   36.40
   7   7   2  777.72   36.10
   7  -7  -2  721.83   35.40
   7   7   2  710.53   35.30
   0  -8   2  896.51   45.90
   0  -8  -2  899.51   45.90
   0   8   2  988.60   49.90
   0   8  -2  966.20   50.99
  -1  -8  -2  172.78   10.40
   1   8  -2  168.48   10.50
   1  -8   2  192.18   10.90
   1  -8   2  178.78   10.30
  -1   8   2  209.28   13.70
   1   8  -2  179.28   14.70
   1   8  -2  217.98   26.20
  -1   8  -2  197.48   14.20
   1  -8  -2  174.98   10.20
   1  -8  -2  195.18   26.00
   2  -8   2 1478.55   74.09
   2   8  -2 1490.55   74.99
   2   8  -2 1512.15   81.59
  -2  -8  -2 1501.75   74.79
   2   8  -2 1802.72   98.49
  -2   8   2 1738.03   79.89
   2   8   2 1436.96   75.39
  -2  -8   2 1447.16   74.79
   2  -8  -2 1551.64   96.59
  -3   8   2  163.08   16.60
  -3  -8  -2  193.48   12.10
   3  -8   2  214.48   12.30
   3   8  -2  153.08   26.00
   3  -8   2  214.38   13.10
   3   8  -2  191.88   11.20
   3   8   2  167.38   13.10
   3  -8  -2  184.98   23.00
  -3  -8   2  206.28   11.60
   3   8   2  215.38   30.40
  -3   8  -2  212.48   15.10
   3   8   2  212.18   13.40
  -4   8   2   97.89    8.80
   4  -8   2  107.49    8.00
  -4  -8  -2   96.99    6.20
   4  -8   2  103.89    7.20
   4   8  -2   95.69    6.40
   4   8  -2   97.49    7.30
  -4   8  -2  107.99    9.30
   4   8   2   98.19    6.80
  -4  -8   2   92.59    6.20
   4  -8  -2   93.29    7.40
   4   8   2  101.19    7.30
  -5  -8  -2  221.68   11.60
   5  -8   2  201.38   12.90
   5   8  -2  220.28   12.60
   5   8  -2  221.58   11.50
   5   8   2  202.18   12.00
   5   8   2  219.18   12.50
   5  -8  -2  222.18   12.80
  -5  -8   2  215.38   11.70
  -5   8  -2  190.68   14.50
   6  -8   2   31.80    3.00
   6   8  -2   34.30    3.00
  -6  -8  -2   26.30    2.10
   6   8   2   32.70    2.80
   6  -8  -2   35.20    3.00
  -6  -8   2   32.00    2.20
   0   9  -2   94.69    6.10
   0  -9   2  105.39    6.20
   0  -9  -2   97.79    6.10
   0   9  -2   96.69   10.20
   1   9  -2  568.54   28.10
  -1   9   2  538.95   31.60
   1  -9   2  541.05   27.60
  -1  -9   2  553.14   28.00
  -1   9  -2  581.44   32.80
   1  -9  -2  562.24   27.70
   2  -9   2   41.20    3.70
  -2  -9  -2   34.90    3.00
  -2   9   2   30.70    5.30
   2   9  -2   35.90    3.00
  -2  -9   2   32.20    2.90
  -2   9  -2   31.30    5.30
   2  -9  -2   32.40    2.40
   2   9   2   30.80    3.10
   3  -9   2  260.47   14.90
   3  -9   2  259.97   15.00
   3   9  -2  241.98   13.10
  -3   9   2  235.68   16.40
  -3  -9  -2  235.18   13.10
   3   9  -2  246.38   14.40
  -3  -9   2  245.78   13.30
   3   9   2  227.88   13.50
   3   9   2  255.07   14.30
  -3   9  -2  241.08   17.70
   3  -9  -2  266.17   14.80
  -4  -9  -2   32.70    2.70
   4  -9   2   34.60    3.70
   4   9  -2   33.10    3.30
   4   9  -2   27.90    2.90
   4  -9  -2   29.40    3.50
   4   9   2   33.80    3.60
   4   9   2   30.50    2.80
   5  -9   2   19.70    2.20
  -5  -9  -2   19.50    1.70
   5   9  -2   19.40    2.20
   5   9   2   19.00    1.80
  -5  -9   2   20.50    1.70
   5  -9  -2   20.70    2.40
   5   9   2   22.70    2.50
   0 -10   2  328.77   16.60
   0 -10  -2  327.47   16.20
   0  10   2  297.07   16.40
   1 -10   2  181.88    9.10
  -1 -10  -2  167.98    9.50
   1 -10   2  186.38   10.20
   1 -10  -2  171.88    9.10
  -1 -10   2  175.88    9.50
   1  10   2  170.18    9.80
   2 -10   2   74.79    5.60
  -2 -10  -2   63.39    4.90
   2  10  -2   81.29    7.10
   2 -10   2   66.39    5.50
   2 -10  -2   84.69    6.30
  -2 -10   2   76.49    5.10
   2  10   2   73.99    4.80
   2  10   2   79.09    5.40
   3 -10   2   25.40    2.70
   3  10  -2   28.80    2.70
  -3 -10  -2   26.40    2.10
   3  10   2   23.40    2.00
  -3 -10   2   24.80    2.10
   3  10   2   26.40    2.50
   3 -10  -2   23.50    2.60
   4  10  -2   55.59    3.70
  -4 -10  -2   57.09    3.50
   4 -10   2   45.10    3.60
   4 -10  -2   46.80    4.00
   4  10   2   45.80    3.10
   4  10   2   56.39    3.60
  -4 -10   2   56.59    3.40
   0 -11   2   15.70    1.80
   0  11   2   14.80    1.60
   0  11  -2   15.10    1.60
   1 -11   2  125.89    7.60
  -1 -11  -2  138.59    6.90
   1  11  -2  141.29    7.60
   1 -11  -2  126.59    7.60
  -1 -11   2  123.39    7.30
   1  11   2  141.29    7.40
  -1 -11   2  132.39    6.70
   1   0   3 2477.35  117.29
   2   0   3 1206.28   54.29
   2   0   3 1133.29   53.79
   2   0  -3 1031.00   57.39
   3   0  -3  153.48   12.10
   3   0   3  170.08    9.20
   3   0   3  191.78    9.90
   4   0  -3  108.99    8.30
   4   0   3   94.39    6.00
   4   0   3  100.69    6.70
   4   0  -3   90.49    8.00
   5   0  -3  837.12   46.40
   5   0   3  959.80   46.60
   5   0  -3  984.70   46.50
   5   0  -3  885.51   48.50
   5   0   3  993.10   47.80
   5   0   3  945.31   46.30
   5   0   3 1002.40   47.40
   5   0   3  953.90   46.80
   5   0   3  988.50   48.30
   5   0   3  915.71   46.50
   5   0  -3  920.71   47.80
   6   0   3  458.45   24.70
   6   0   3  475.75   24.30
   6   0  -3  449.86   24.60
   6   0   3  461.85   25.50
   6   0  -3  432.66   24.60
   6   0   3  493.75   26.70
   6   0   3  493.55   24.90
   6   0  -3  525.05   25.90
   6   0  -3  451.85   24.60
   6   0  -3  515.15   25.10
   6   0   3  480.55   25.90
   6   0   3  481.25   26.00
   6   0   3  478.45   25.10
   7   0   3  737.43   37.50
   7   0   3  764.62   39.10
   7   0   3  702.03   37.50
   7   0   3  731.53   37.10
   7   0   3  784.62   40.00
   7   0  -3  743.83   37.60
   7   0  -3  714.43   37.40
   7   0   3  743.33   38.60
   7   0  -3  707.13   37.50
   7   0  -3  848.02   38.00
   8   0   3   71.99    4.90
   8   0  -3   67.69    5.00
   8   0   3   77.59    6.10
   8   0   3   73.89    5.80
   8   0   3   75.59    5.10
   8   0  -3   77.09    5.10
   8   0   3   71.79    5.30
   8   0   3   78.79    6.50
   9   0   3   81.29    4.70
   9   0  -3   80.59    4.90
   0   1  -3    5.50    1.60
   0   1   3    6.70    0.60
   0  -1  -3    5.00    2.10
   1   1  -3  842.92   44.20
   1  -1   3  860.11   38.60
   1   1  -3  785.22   40.10
   1  -1   3  804.32   38.70
   1   1   3  836.42   38.80
   1   1   3  702.23   41.80
   1   1   3  834.92   39.30
   2  -1   3 1076.89   49.99
   2   1  -3 1002.90   51.89
   2   1  -3 1044.60   54.19
   2   1   3 1001.90   52.19
   2   1   3 1132.19   50.29
   2   1   3 1031.00   50.69
   2  -1  -3 1009.00   54.39
   3  -1   3 4592.84  208.28
   3  -1   3 4179.78  207.78
   4   1  -3  193.88   14.60
   4  -1   3  240.08   12.50
   4  -1   3  225.28   12.10
   4   1  -3  225.28   13.00
   4   1  -3  221.08   15.00
   4   1   3  243.78   13.40
   4  -1  -3  237.68   15.30
   4   1   3  220.78   12.30
   5   1  -3  330.37   17.00
   5  -1   3  298.37   19.60
   5  -1   3  334.47   16.90
   5  -1   3  297.97   17.90
   5   1  -3  291.77   18.10
   5  -1   3  352.16   18.20
   5  -1   3  312.87   16.60
   5   1  -3  341.67   18.10
   5  -1   3  352.66   17.50
   5   1  -3  311.57   18.50
   5   1   3  330.07   17.40
   5  -1  -3  328.57   17.60
   5   1   3  323.37   17.90
   5   1   3  327.07   18.50
   5   1   3  318.47   16.60
   5   1   3  319.47   18.50
   5  -1  -3  296.87   16.80
   5   1   3  325.97   18.40
   5   1   3  262.07   18.10
   5  -1  -3  301.67   17.60
   6  -1   3  643.14   36.00
   6  -1   3  705.23   35.70
   6  -1   3  661.73   34.90
   6   1  -3  678.73   35.10
   6  -1   3  701.73   37.20
   6  -1   3  731.23   36.40
   6   1  -3  708.93   36.10
   6   1  -3  731.23   36.40
   6  -1   3  756.22   35.60
   6   1  -3  739.13   35.40
   6   1  -3  686.73   35.40
   6  -1   3  709.33   35.10
   6   1  -3  662.43   35.40
   6  -1  -3  763.42   36.40
   6  -1  -3  639.14   34.80
   6   1   3  668.83   36.80
   6   1   3  701.83   37.00
   6   1   3  706.73   34.80
   6   1   3  719.93   37.30
   6  -1  -3  721.23   35.70
   6   1   3  695.23   35.60
   6   1   3  680.33   35.90
   6  -1  -3  664.93   35.00
   6   1   3  700.83   35.40
   6  -1  -3  660.33   35.00
   7   1  -3   73.39    5.50
   7  -1   3   75.79    5.30
   7  -1   3   69.09    5.30
   7   1  -3   68.09    5.90
   7   1  -3   69.49    5.40
   7  -1   3   81.69    7.10
   7   1  -3   75.49    5.60
   7   1  -3   71.49    5.60
   7  -1   3   70.59    6.10
   7  -1   3   69.79    5.00
   7  -1   3   78.89    6.40
   7   1   3   75.39    5.60
   7  -1  -3   69.29    5.40
   7   1   3   76.29    5.10
   7   1   3   77.79    6.60
   7  -1  -3   83.09    6.20
   7   1   3   73.79    6.90
   7   1   3   87.89    5.90
   7  -1  -3   72.89    5.30
   7  -1  -3   69.39    5.20
   7  -1  -3   74.79    5.70
   7   1   3   76.59    6.00
   8   1  -3  105.69    6.80
   8   1  -3   98.69    6.90
   8  -1   3  107.99    6.60
   8   1  -3  104.69    6.90
   8  -1   3  118.29    8.40
   8  -1   3  122.59    6.80
   8  -1   3  112.09    7.70
   8   1   3  112.89    7.60
   8  -1  -3  109.69    6.80
   8  -1  -3  115.39    7.40
   8  -1  -3  112.99    6.70
   8   1   3  113.59    8.40
   8   1   3  111.79    6.90
   8   1   3  100.89    7.90
   8   1   3   96.89    7.10
   8   1   3  109.49    6.60
   9   1  -3   40.10    2.90
   9   1  -3   40.30    2.90
   9  -1   3   39.10    2.80
   9  -1   3   47.00    4.00
   9  -1  -3   46.40    3.00
   9   1   3   45.90    3.00
   9   1   3   41.40    2.80
   1  -2   3  125.59    6.80
  -1  -2  -3  127.29   11.10
   1   2  -3  135.99    8.40
   1   2  -3  131.49    7.20
   1   2  -3  142.09   11.00
   1   2   3  133.09    7.70
   1  -2  -3  131.49    6.50
   1  -2  -3  143.19   11.50
   1   2   3  128.89    7.10
  -1   2  -3  141.89    7.90
   2   2  -3 1211.78   63.89
   2   2  -3 1402.36   67.49
   2  -2   3 1311.37   61.59
   2   2  -3 1313.77   68.69
   2  -2  -3 1285.87   67.59
   2   2   3 1348.27   61.99
   2   2   3 1148.49   66.19
   3  -2   3  455.75   22.80
   3   2  -3  456.45   28.20
   3   2  -3  467.05   23.90
   3   2  -3  491.15   29.40
   3   2   3  462.45   23.30
   3  -2  -3  483.85   28.70
   3   2   3  414.16   25.50
   4  -2   3  850.81   40.90
   4   2  -3  864.01   46.60
   4   2  -3  841.82   42.20
   4   2  -3  765.62   45.70
   4   2   3  829.22   41.30
   4  -2  -3  889.41   46.40
   4   2   3  798.42   42.50
   5  -2   3  104.89    8.10
   5  -2   3  110.09    7.10
   5   2  -3  115.89    7.70
   5   2  -3   99.79    7.20
   5   2  -3  106.29    7.00
   5  -2   3  123.99    7.70
   5  -2   3  104.99    7.80
   5  -2   3  110.79    6.70
   5   2  -3  100.99    6.90
   5  -2   3  118.29    6.80
   5  -2   3  113.39    6.60
   5   2  -3   99.29    7.80
   5   2   3  108.19    7.30
   5   2   3  130.69    8.80
   5   2   3  122.19    8.50
   5   2   3  102.29    7.20
   5   2   3  114.29    8.10
   5  -2  -3  102.49    6.60
   5   2   3   99.99    7.10
   5   2   3  113.49    8.50
   5  -2  -3  115.29    6.90
   5  -2  -3   99.49    6.70
   5  -2  -3  113.59    7.60
   6  -2   3  274.57   15.20
   6  -2   3  263.27   14.50
   6   2  -3  263.47   15.10
   6   2  -3  257.67   14.90
   6  -2   3  272.47   16.20
   6   2  -3  254.37   15.40
   6  -2   3  283.67   14.70
   6  -2   3  257.37   14.70
   6   2  -3  244.38   15.50
   6  -2   3  273.17   16.80
   6   2   3  262.47   16.30
   6   2   3  280.97   15.50
   6  -2  -3  268.97   14.70
   6   2   3  256.87   15.20
   6  -2  -3  295.87   15.90
   6   2   3  288.87   16.90
   6  -2  -3  291.57   15.80
   6   2   3  291.97   15.80
   6   2   3  290.27   17.40
   6  -2  -3  262.67   14.50
   7  -2   3  132.99    8.70
   7   2  -3  124.69    8.70
   7  -2   3  137.39    7.80
   7  -2   3  136.29    9.70
   7  -2   3  129.49    7.70
   7   2  -3  120.59    8.40
   7   2  -3  120.39    8.00
   7   2  -3  122.09    8.00
   7  -2   3  132.59    9.20
   7   2   3  131.19    7.60
   7  -2  -3  137.79    7.80
   7  -2  -3  116.29    7.70
   7   2   3  122.29    8.30
   7   2   3  126.69    8.80
   7   2   3  130.49    8.50
  -7   2  -3  116.79   10.00
   7   2   3  118.79   10.00
   7   2   3  125.89    9.70
   7   2   3  127.19    9.40
   7  -2  -3  142.09    8.70
   8   2  -3  609.24   32.00
   8   2  -3  633.74   31.70
   8  -2   3  614.94   31.40
   8  -2   3  675.43   33.60
   8  -2   3  600.44   32.70
   8  -2  -3  603.44   31.50
   8  -2  -3  670.03   31.90
   8   2   3  643.14   32.00
   8   2   3  674.13   31.40
   9  -2   3  145.89    8.50
   9   2  -3  150.48    8.60
   9   2  -3  149.79    8.00
   9   2   3  155.78    8.10
   9   2   3  151.68    8.30
   9  -2  -3  144.69    8.30
   0   3   3   78.29    5.00
   0   3  -3   86.29    4.30
   0   3  -3   85.79    5.70
   0  -3   3   73.99    8.70
   0  -3  -3   77.39    9.10
   1  -3   3 1339.97   71.89
  -1  -3  -3 1293.47   72.69
   1   3  -3 1349.56   71.69
   1   3  -3 1313.07   65.19
   1  -3  -3 1365.06   72.69
   1   3   3 1493.95   65.29
   2   3  -3  582.54   35.80
   2  -3   3  509.75   25.90
   2   3  -3  490.85   28.40
   2   3  -3  517.25   26.60
   2  -3  -3  573.54   33.70
   2   3   3  540.95   27.40
   2   3   3  503.55   33.60
   3   3  -3 1146.99   61.49
   3   3  -3 1341.07   71.19
   3   3  -3 1347.67   68.79
   3   3  -3 1164.48   63.79
   3  -3   3 1214.38   60.59
   3   3   3 1173.58   67.29
   3  -3  -3 1367.56   69.29
   3   3   3 1332.17   62.79
   4   3  -3  124.79   12.60
   4   3  -3  114.19    8.50
   4   3  -3  123.49    8.50
   4  -3   3  141.79    7.60
   4   3  -3  129.69   14.10
   4  -3   3  117.29    8.40
   4   3   3  122.09    9.10
   4   3   3  128.39    8.10
   4   3   3  129.59    8.90
   4   3   3  128.69    8.70
   4  -3  -3  138.29   13.00
   4   3   3  124.19    9.00
   4   3   3  123.89    8.00
   4   3   3  136.49    8.60
   5   3  -3  754.52   38.10
   5   3  -3  748.23   38.60
   5   3  -3  740.83   38.60
   5   3  -3  690.03   41.60
   5  -3   3  743.73   37.30
   5  -3   3  759.22   39.40
   5  -3   3  877.01   38.50
   5  -3   3  772.82   39.60
   5  -3   3  824.42   38.00
   5   3  -3  643.34   39.10
   5   3  -3  740.23   37.90
   5   3   3  745.53   38.50
   5   3   3  751.02   37.30
   5   3   3  777.32   38.70
   5   3   3  816.42   39.70
   5   3   3  724.43   38.40
   5  -3  -3  786.62   39.10
   5  -3  -3  714.73   37.40
   5   3   3  767.32   39.50
   5  -3  -3  807.92   37.50
   6   3  -3  683.53   34.80
   6  -3   3  695.33   36.60
   6   3  -3  616.74   35.10
   6  -3   3  664.53   34.00
   6   3  -3  688.33   34.60
   6  -3   3  646.14   36.00
   6   3   3  736.63   36.90
   6   3   3  682.23   36.30
   6   3   3  664.43   37.30
   6   3   3  738.93   35.80
   6   3   3  688.43   35.20
   6   3   3  691.33   34.00
   6  -3  -3  735.43   35.70
   6  -3  -3  671.93   34.20
   7  -3   3  107.49    8.20
   7   3  -3   81.89    7.10
   7   3  -3  108.29    7.50
   7   3   3  104.59    6.20
   7   3   3   93.09    8.90
   7  -3  -3  106.59    7.20
   7   3   3  104.29    8.40
  -7   3  -3  103.29    9.00
   7  -3  -3  101.09    6.90
   8   3  -3   33.70    2.70
   8   3  -3   37.10    3.00
   8  -3   3   32.80    3.40
   8  -3   3   32.80    2.60
   8   3  -3   31.70    3.00
   8  -3  -3   32.50    2.60
   8  -3  -3   30.50    2.80
   8   3   3   38.90    4.10
   8   3   3   30.70    2.90
   8   3   3   34.00    2.50
   8   3   3   34.30    3.40
   9   3  -3   96.09    4.90
   9  -3   3   92.09    5.60
   9   3  -3   88.39    5.30
   9  -3  -3   88.49    4.90
   9   3   3   89.89    5.40
   9   3   3   97.89    5.30
   0  -4   3 4761.32  246.08
   0  -4  -3 5136.69  247.28
   0   4  -3 5038.60  235.38
  -1  -4  -3 1442.46   81.39
   1   4  -3 1519.75   72.79
   1  -4   3 1338.27   79.39
  -1   4   3 1369.56   70.79
   1   4   3 1629.24   71.29
   1   4   3 1345.07   71.39
   1  -4  -3 1530.45   81.09
  -1   4  -3 1586.64   72.59
   2   4  -3   49.00    5.40
   2   4  -3   58.89    8.60
   2  -4   3   54.89    8.30
   2  -4   3   50.09    3.40
   2   4   3   52.39    4.60
   2   4   3   46.00    4.00
   2  -4  -3   54.89    8.50
  -2   4  -3   54.69    5.10
   2  -4  -3   58.39    2.90
   2   4   3   45.80   13.00
   3   4  -3  468.75   25.00
   3   4  -3  439.06   27.30
   3   4  -3  557.54   33.80
   3  -4   3  482.35   23.80
   3   4   3  421.96   25.70
   3   4   3  425.06   33.20
  -3   4  -3  492.25   26.20
   3  -4  -3  519.55   33.70
   4   4  -3 1878.11   98.39
   4  -4   3 2052.79  100.09
   4   4  -3 1995.20   98.79
   4  -4   3 2258.27   98.49
   4   4  -3 2107.89  108.79
   4   4  -3 1907.71   99.29
   4  -4   3 2057.19   97.99
   4  -4  -3 2254.67  109.59
   4   4   3 2044.60  100.99
   4   4   3 1897.81  105.29
   4   4   3 2000.50   99.09
   4   4   3 2218.08  104.79
   4   4   3 1996.30   99.99
   4   4   3 2022.40   99.29
   5   4  -3 1267.37   66.69
   5   4  -3 1361.36   65.49
   5  -4   3 1450.45   67.69
   5  -4   3 1295.47   64.79
   5  -4   3 1453.55   65.69
   5  -4   3 1294.17   67.49
   5   4  -3 1329.07   67.39
   5   4  -3 1335.97   65.79
   5   4  -3 1380.26   66.39
   5   4   3 1376.16   66.39
   5   4   3 1317.77   66.39
   5   4   3 1235.68   68.49
   5  -4  -3 1327.87   72.19
   5  -4  -3 1410.76   66.99
   5  -4  -3 1324.37   64.89
   6   4  -3   84.99    5.70
   6   4  -3   82.59    6.50
   6  -4   3   92.69    7.20
   6   4  -3   77.69    5.90
   6  -4   3   81.49    6.90
   6  -4   3   87.99    5.30
   6   4  -3   79.59    6.20
   6   4   3   87.49    6.40
   6   4   3   87.99    5.20
   6   4   3   77.79    6.80
   6   4   3   72.49    7.80
  -6   4  -3   77.29    7.80
   6  -4  -3   80.49    6.50
   6   4   3   84.89    6.50
   6  -4  -3   78.89    5.20
   7   4  -3  416.56   24.20
   7   4  -3  507.95   23.80
   7   4  -3  454.45   24.70
   7  -4   3  446.96   25.40
   7  -4   3  462.15   23.30
   7  -4   3  459.95   25.50
   7   4  -3  443.56   23.90
   7   4   3  420.46   25.10
   7   4   3  477.95   24.60
   7   4   3  531.95   25.30
   7  -4  -3  461.35   23.30
   7  -4  -3  519.65   24.90
  -7   4  -3  455.15   26.90
   8  -4   3   18.80    3.00
   8  -4   3   18.80    2.30
   8   4  -3   16.10    2.60
   8   4  -3   17.20    1.80
   8  -4  -3   16.90    2.10
   8   4   3   17.70    2.30
   8   4   3   18.70    2.40
   8  -4  -3   15.90    1.50
   8   4   3   15.20    2.60
   0   5   3  475.95   25.20
   0   5   3  531.85   26.00
   0   5  -3  470.25   26.40
   0  -5  -3  474.35   35.60
   1   5  -3  215.58   13.90
  -1  -5  -3  184.78   20.50
   1  -5   3  208.28   20.30
   1   5  -3  217.58   11.60
  -1   5   3  204.78   13.00
  -1   5   3  208.38   11.90
  -1   5  -3  230.28   13.80
   1   5   3  209.68   12.70
   1  -5  -3  213.18   20.70
   1   5   3  244.88   12.80
  -2   5   3   54.79    4.20
   2   5  -3   58.49    9.70
   2  -5   3   56.39    3.90
   2   5  -3   60.69    4.60
   2  -5  -3   56.69    3.40
   2   5   3   63.39    5.30
  -2   5  -3   66.49    6.40
   2  -5  -3   53.19    9.90
  -3  -5  -3 1748.63   84.49
   3   5  -3 1641.04   84.89
  -3   5   3 1965.70   84.99
   3   5  -3 1697.43   89.19
   3   5   3 1687.73   85.19
   3   5   3 1711.53   86.09
  -3   5  -3 1877.01   88.79
  -3  -5   3 1780.32   84.49
   3   5   3 1717.93   85.59
   4   5  -3  127.29    9.40
   4   5  -3  144.69   10.00
   4  -5   3  142.89   10.00
   4  -5   3  141.89    8.70
   4   5  -3  154.48   17.00
  -4  -5  -3  132.89    8.30
   4  -5   3  138.09    9.80
   4   5  -3  154.58    9.10
   4   5  -3  142.29    8.90
   4   5   3  140.79   10.60
   4  -5  -3  161.48   10.10
   4   5   3  145.79    9.90
  -4  -5   3  148.19    8.50
  -4   5  -3  140.69   11.00
   4   5   3  143.19    9.50
   4  -5  -3  164.48   17.50
   4   5   3  165.08   15.00
   4   5   3  145.29    9.30
   5   5  -3  900.51   44.80
   5   5  -3  820.62   43.60
   5   5  -3  869.81   42.90
   5  -5   3  817.42   44.20
   5   5  -3  847.72   42.80
   5   5  -3  919.11   42.30
   5  -5  -3  892.71   44.10
   5   5   3  874.91   43.60
   5   5   3  851.91   45.60
   5   5   3  873.51   44.20
  -5   5  -3  800.32   45.70
   5  -5  -3  840.72   41.60
   5   5   3  833.32   43.40
  -5  -5   3  832.82   42.10
   6  -5   3  492.65   29.70
   6   5  -3  488.95   27.60
   6   5  -3  522.65   27.30
   6  -5   3  544.55   28.40
   6   5  -3  562.34   25.90
   6  -5  -3  495.15   25.30
   6   5   3  499.25   27.10
   6  -5  -3  516.25   28.70
   6   5   3  494.25   27.60
   6   5   3  525.95   27.10
  -6   5  -3  516.75   29.60
  -6  -5   3  465.85   25.50
  -7   5   3  157.08   15.10
   7   5  -3  154.18   10.10
   7   5  -3  175.98    9.00
   7   5  -3  156.78    9.50
   7  -5   3  187.98   10.90
   7  -5   3  156.48   10.60
   7   5   3  169.98   10.20
   7   5   3  166.08   10.60
   7   5   3  170.68   10.40
   7  -5  -3  172.58    9.10
   7  -5  -3  182.48   10.30
  -7   5  -3  161.78   12.10
   8  -5   3    4.60    1.20
   8   5  -3    8.20    1.20
   8   5  -3    5.90    1.20
   8   5   3    8.80    1.20
   8   5   3    8.40    1.20
   8   5   3    6.40    1.40
   0  -6   3 1338.97   62.79
   0  -6  -3 1209.38   62.69
   0   6   3 1355.96   64.19
   0   6   3 1157.68   70.09
   0  -6  -3 1450.45   81.89
  -1  -6  -3  708.83   36.10
  -1   6   3  733.13   37.10
   1   6  -3  764.12   36.20
   1   6  -3  747.93   50.39
   1   6  -3  734.23   40.00
  -1   6   3  757.62   38.50
   1  -6   3  731.13   36.00
   1  -6  -3  700.13   36.00
   1   6   3  677.33   37.50
  -1  -6   3  705.63   36.10
   1  -6  -3  746.63   51.49
  -1   6  -3  720.33   39.00
   1   6   3  801.72   38.30
  -2   6   3  571.74   29.50
   2   6  -3  550.54   33.60
   2   6  -3  675.23   44.40
   2   6  -3  513.65   29.20
   2  -6   3  596.84   29.10
  -2   6   3  608.24   32.10
  -2  -6  -3  601.94   29.20
  -2  -6   3  597.84   29.20
  -2   6  -3  566.94   32.40
   2   6   3  595.34   31.30
   2  -6  -3  609.54   28.90
   2   6   3  517.85   30.10
   3   6  -3 1061.39   56.29
   3  -6   3 1183.78   56.09
  -3  -6  -3 1154.98   55.99
   3   6  -3 1311.67   72.79
  -3   6   3 1117.59   59.59
   3   6  -3 1179.68   57.39
   3   6  -3 1118.39   61.39
  -3  -6   3 1182.48   56.09
  -3   6  -3 1245.68   60.89
   3   6   3 1056.49   56.69
   3   6   3 1117.19   57.39
   3   6   3 1122.49   58.59
   3   6   3 1062.89   57.09
   3  -6  -3 1206.78   72.49
   4   6  -3  672.93   37.20
  -4  -6  -3  730.13   35.80
   4  -6   3  726.43   38.00
   4  -6   3  744.33   37.80
   4   6  -3  712.53   36.30
   4   6  -3  758.72   37.90
   4   6  -3  726.03   49.10
   4   6   3  720.23   37.40
   4   6   3  682.53   36.80
   4  -6  -3  748.53   49.70
  -4   6  -3  690.13   39.60
  -4  -6   3  722.23   35.80
   4  -6  -3  756.72   37.90
   4   6   3  695.43   37.10
  -5  -6  -3  212.88   11.40
  -5   6   3  194.48   14.70
   5  -6   3  211.78   13.50
   5  -6   3  230.08   13.50
   5   6  -3  180.18   18.20
   5   6  -3  209.88   12.00
   5   6  -3  202.18   12.80
  -5  -6   3  210.08   11.50
   5   6   3  196.78   14.50
  -5   6  -3  211.28   14.80
   5   6   3  213.18   12.80
   5   6   3  199.48   12.80
   5  -6  -3  224.78   13.30
   5   6   3  197.38   12.50
   6  -6   3  155.48   10.60
   6  -6   3  161.88   10.30
   6   6  -3  149.09    9.90
   6   6  -3  151.28    9.10
  -6   6   3  150.98   12.10
   6  -6  -3  167.18   10.30
   6   6   3  150.18    9.80
   6   6   3  143.49    9.80
   6   6   3  165.48   10.00
  -6  -6   3  154.48    8.70
  -6   6  -3  161.38   12.00
   7  -6   3   23.10    3.00
   7  -6   3   25.10    3.10
   7   6  -3   24.00    3.00
   7   6  -3   23.00    2.10
   7   6   3   28.00    3.50
   7   6   3   24.50    2.50
   7  -6  -3   25.70    2.50
   7   6   3   19.70    2.70
   8   6  -3  378.56   18.40
   8  -6   3  329.77   18.50
   8   6   3  401.66   18.40
   8   6   3  363.66   18.30
   0   7   3  845.52   43.50
   0  -7  -3  864.11   42.20
   0  -7   3  874.71   42.20
   0  -7  -3  842.92   63.29
   1   7  -3  284.07   28.80
   1  -7   3  265.57   14.80
  -1  -7  -3  298.47   15.20
   1  -7   3  253.07   14.50
  -1   7   3  297.37   17.50
   1   7  -3  270.17   19.00
   1  -7  -3  257.27   14.60
   1  -7  -3  316.77   31.70
  -1   7  -3  269.47   18.10
   1   7   3  280.57   17.20
  -1  -7   3  279.77   15.30
  -2   7   3  470.75   28.50
   2  -7   3  484.75   24.10
  -2  -7  -3  496.05   24.60
   2  -7   3  510.55   24.80
   2   7  -3  447.86   24.60
   2   7  -3  460.95   29.70
  -2  -7   3  495.85   24.60
   2  -7  -3  465.45   24.20
  -2   7  -3  490.95   28.20
   2   7   3  498.85   27.90
   3   7  -3  839.82   42.90
   3  -7   3  871.21   44.20
   3  -7   3  811.12   44.10
   3   7  -3  975.00   82.49
  -3  -7  -3  900.31   42.70
   3   7  -3  794.82   47.90
   3   7   3  856.91   43.50
   3   7   3  817.52   45.20
   3   7   3  853.41   43.60
   3  -7  -3  945.21   62.79
  -3  -7   3  877.81   42.70
   4   7  -3  366.66   21.00
   4   7  -3  352.56   19.70
   4  -7   3  400.26   21.20
  -4   7   3  367.26   23.00
   4   7  -3  372.06   32.10
   4  -7   3  374.76   21.40
  -4  -7  -3  381.56   19.40
   4   7   3  410.46   30.20
   4   7   3  376.16   20.80
  -4   7  -3  380.56   23.50
   4  -7  -3  375.06   21.20
   4   7   3  337.27   22.10
   4   7   3  370.56   20.50
   4   7   3  370.86   20.50
  -4  -7   3  380.46   19.60
   4  -7  -3  367.86   31.80
   5   7  -3   20.60    2.90
   5  -7   3   24.90    3.40
   5   7  -3   17.30    2.20
   5  -7   3   22.40    3.10
  -5  -7  -3   26.20    2.30
  -5   7   3   22.60    4.30
  -5  -7   3   22.40    2.30
   5   7   3   19.80    2.70
   5  -7  -3   21.70    3.00
   5   7   3   20.90    2.80
  -5   7  -3   23.30    4.20
   5   7   3   21.40    2.70
   6   7  -3   68.39    4.30
  -6  -7  -3   57.89    4.00
   6   7  -3   61.49    5.00
   6  -7   3   68.79    6.00
   6  -7   3   69.39    5.00
   6  -7  -3   62.69    5.80
   6   7   3   60.59    4.80
   6   7   3   62.39    4.90
   6   7   3   66.39    4.60
  -6  -7   3   64.09    4.10
   7   7  -3  398.86   20.70
   7  -7   3  340.87   20.60
   7  -7  -3  382.56   19.30
   7   7   3  417.36   19.70
   7   7   3  391.06   19.60
   0  -8   3   30.20    2.80
   0   8  -3   25.90    5.20
   0  -8  -3   31.70    2.70
  -1  -8  -3  181.98   10.60
  -1   8   3  222.28   13.90
   1  -8   3  201.68   11.10
   1   8  -3  166.38   10.50
   1   8  -3  175.98   15.10
   1  -8   3  190.08   10.40
   1   8  -3  203.48   26.10
   1  -8  -3  203.28   26.20
  -1   8  -3  194.98   14.50
  -1  -8   3  176.08   10.60
   1  -8  -3  180.88   10.40
   2  -8   3   45.20    3.20
   2   8  -3   42.50    3.60
   2   8  -3   48.40   14.70
  -2  -8  -3   48.70    3.70
   2   8  -3   40.20    7.70
  -2   8   3   47.10    5.70
  -2   8  -3   49.90    6.30
   2  -8  -3   60.49   16.00
  -2  -8   3   49.60    3.80
   2  -8  -3   44.90    3.30
   2   8   3   43.60    4.00
  -3  -8  -3   89.19    5.90
  -3   8   3   92.89    8.40
   3  -8   3   92.39    8.30
   3  -8   3   95.09    6.90
   3   8  -3   83.79    5.80
   3   8   3   81.59    6.90
  -3   8  -3   67.29    9.60
   3   8   3   97.49    7.20
  -3  -8   3   88.39    6.40
   4   8  -3  124.29    7.40
   4   8  -3  112.59    8.40
  -4   8   3  115.29    9.90
   4  -8   3  125.09    9.10
  -4  -8  -3  124.89    7.40
   4  -8   3  128.09    8.50
   4  -8  -3  132.19    8.80
  -4   8  -3  136.99   10.70
   4   8   3  124.19    8.40
  -4  -8   3  123.39    7.40
   4   8   3  111.09    8.00
   5   8  -3   18.70    2.50
   5  -8   3   20.50    2.80
  -5  -8  -3   18.10    1.80
   5  -8   3   14.90    2.10
   5   8  -3   13.60    1.70
   5  -8  -3   20.20    2.50
   5   8   3   20.20    2.40
  -5  -8   3   14.60    2.40
   5   8   3   19.70    2.20
   6  -8   3  374.06   19.00
   6   8  -3  363.56   18.70
  -6  -8  -3  313.37   17.80
   6   8   3  355.46   18.70
  -6  -8   3  354.56   17.70
   6  -8  -3  379.96   18.80
   6   8   3  372.16   18.80
   0   9  -3  609.04   36.00
   0  -9  -3  614.94   30.50
   1   9  -3  249.18   19.80
  -1  -9  -3  292.47   15.10
   1  -9   3  294.47   14.60
  -1  -9   3  282.67   15.00
  -1   9  -3  292.37   19.70
   1  -9  -3  282.67   14.70
   2  -9   3  320.97   18.70
   2  -9   3  360.96   18.60
  -2  -9  -3  338.67   17.50
  -2   9   3  318.07   20.70
  -2   9  -3  341.37   21.60
   2   9   3  318.17   18.00
   2   9   3  328.27   18.50
  -2  -9   3  340.07   17.50
   2  -9  -3  344.77   16.80
  -3  -9  -3   26.20    2.40
   3  -9   3   28.80    3.30
   3  -9   3   26.60    3.10
   3   9  -3   32.00    3.40
   3  -9  -3   26.20    3.20
   3   9   3   28.40    3.10
  -3  -9   3   25.10    2.40
   3   9   3   25.00    2.70
  -3   9  -3   21.50    4.80
  -4  -9  -3   39.50    3.00
   4  -9   3   34.20    3.40
   4   9  -3   40.70    3.80
   4  -9   3   43.30    4.00
   4   9   3   36.10    3.10
  -4  -9   3   35.30    3.00
   4   9   3   36.90    3.40
   4  -9  -3   36.80    3.50
  -5  -9  -3  366.16   18.00
   5   9  -3  351.86   18.70
   5  -9   3  366.96   19.10
  -5  -9   3  370.66   18.00
   5  -9  -3  348.97   18.60
   5   9   3  370.06   18.50
   5   9   3  348.47   18.20
   0  10   3   48.90    4.20
   0 -10  -3   58.79    3.90
   0 -10   3   55.09    3.50
   1 -10   3  463.65   22.70
  -1 -10  -3  420.46   21.90
   1  10   3  412.86   22.20
   1 -10  -3  449.95   21.50
  -1 -10   3  427.36   22.30
   1  10   3  454.75   23.10
  -2 -10  -3  166.78    9.30
   2  10  -3  175.08   10.20
   2 -10   3  162.08   10.10
   2 -10   3  179.68    9.70
  -2 -10   3  171.88    9.20
   2  10   3  166.88    9.50
   2 -10  -3  171.78   10.30
   2  10   3  177.68   10.00
   3 -10   3  162.98    9.90
   3  10  -3  183.68   10.00
  -3 -10  -3  181.38    9.30
   3 -10  -3  167.98   10.00
  -3 -10   3  179.58    9.20
   3  10   3  193.28   11.90
   3  10   3  149.99    9.30
   4  10  -3  173.68    9.70
   4 -10   3  150.18    9.50
  -4 -10  -3  191.28    8.90
  -4 -10   3  152.78    8.90
   4  10   3  154.88    8.70
   4  10   3  180.78    9.10
   4 -10  -3  183.28    9.40
   0  11  -3   15.40    1.60
   0  11   3   15.60    1.50
   0 -11   3   13.30    1.40
   0  11   3   11.40    1.20
  -1 -11  -3  120.19    5.90
   1 -11   3  118.79    6.50
  -1  11   3  122.99    6.30
  -1 -11   3  107.29    5.80
   1  11   3  119.19    6.30
  -1 -11   3  100.49    6.00
  -1 -11   3   97.79    6.20
   0   0   4 1207.38   57.69
   0   0  -4 1195.28   62.29
   0   0  -4 1248.18   58.79
   1   0   4  629.04   29.80
   1   0   4  650.53   30.10
   1   0   4  630.04   33.10
   1   0  -4  565.94   34.10
   2   0   4 1496.65   72.09
   2   0   4 1633.64   75.19
  -2   0  -4 1510.95   72.09
   2   0   4 1601.14   72.59
   2   0  -4 1300.77   76.49
   3   0  -4 2404.86  120.29
   4   0  -4    7.10    2.90
   4   0   4    5.20    1.20
   5   0  -4  526.05   28.00
   5   0  -4  583.64   29.30
   5   0   4  565.04   28.90
   5   0   4  587.04   29.20
   5   0   4  560.04   28.50
   5   0   4  494.85   31.90
   5   0   4  485.55   30.70
   5   0  -4  591.44   28.80
   5   0   4  569.34   29.80
   5   0   4  583.44   28.00
   5   0  -4  519.45   28.00
   6   0  -4  181.68   10.90
   6   0   4  179.38   10.80
   6   0  -4  165.08   10.00
   6   0   4  183.68   11.40
   6   0  -4  182.48   10.30
   6   0   4  180.78   11.50
   6   0   4  150.68   12.30
   6   0  -4  147.99   12.50
   6   0   4  154.18   13.80
   6   0   4  167.38   10.30
   6   0   4  171.68   10.40
   6   0   4  166.88   10.70
   6   0  -4  169.48   10.20
   7   0   4  110.09    6.90
   7   0   4  105.09    7.80
   7   0   4  110.49    6.60
   7   0   4  114.49    8.90
   7   0  -4   90.69    6.60
   7   0   4   93.89    7.80
   7   0  -4  112.39    7.00
   7   0   4   95.89    6.80
   7   0  -4   99.99    6.90
   8   0   4   63.99    5.50
   8   0  -4   66.29    4.80
   8   0   4   68.09    5.70
   8   0   4   83.49    6.70
   8   0   4   64.09    4.90
   8   0  -4   63.19    4.60
   8   0   4   73.79    4.80
   8   0   4   65.09    4.50
   9   0  -4   18.60    1.70
  -1   1   4 5124.79  232.28
   1   1  -4 4724.73  234.58
   2  -1   4  624.74   28.00
   2   1  -4  520.85   30.60
   2   1  -4  596.84   33.30
   2  -1   4  593.34   27.90
   2   1   4  505.35   29.20
  -2   1  -4  600.74   28.50
   2   1   4  579.34   31.00
   2  -1  -4  555.74   33.20
   3   1  -4 3551.64  179.18
   3  -1   4 3810.72  173.08
   3   1  -4 3361.06  178.38
   3   1   4 3757.22  173.08
   3  -1  -4 3707.53  179.08
   4   1  -4  807.72   50.89
   4  -1   4  981.90   46.70
   4  -1   4  999.80   46.90
   4   1  -4  988.60   52.29
   4   1   4  963.50   46.90
   4  -1  -4  964.00   51.79
   4   1   4  965.40   47.90
   5  -1   4  121.79    9.10
   5  -1   4  128.09    8.80
   5   1  -4  151.68    9.00
   5  -1   4  122.29    7.70
   5   1  -4  131.29    8.50
   5  -1   4  130.99    9.30
   5   1  -4  124.49    8.00
   5  -1   4  135.99    7.70
   5   1  -4  122.39    9.30
   5  -1   4  138.89    8.50
   5  -1   4  132.69    8.30
   5  -1   4  137.49    9.20
   5   1   4  129.89    8.50
   5   1   4  134.49    9.30
   5  -1  -4  132.69    8.20
   5   1   4  125.59    9.20
   5   1   4  128.09    8.40
   5  -1  -4  126.09    7.90
   5   1   4  147.49    8.40
   5   1   4  139.99    9.30
   5  -1  -4  130.79    7.90
   5  -1  -4  125.89    9.60
   5  -1  -4  120.69    7.80
   5   1   4  118.69    8.10
   6   1  -4  112.49    6.80
   6  -1   4   93.69    6.20
   6   1  -4   89.79    7.20
   6   1  -4   84.39    6.70
   6  -1   4   95.99    7.80
   6  -1   4   90.19    6.80
   6  -1   4   86.39    7.40
   6  -1   4   80.69    8.70
   6  -1   4   96.59    7.70
   6  -1   4  108.09    7.50
   6   1  -4   91.09    6.90
   6   1   4  106.49    7.80
   6   1   4   95.09    7.90
  -6   1  -4   87.89    7.60
   6  -1  -4   92.59    6.70
   6  -1  -4  104.59    6.80
   6  -1  -4   91.99    7.10
   6   1   4   85.39    6.90
   6   1   4   93.39    7.00
   6  -1  -4   91.59    6.90
   6   1   4   91.29    7.50
   6  -1  -4   89.09    6.70
   6   1   4   96.99    7.10
   6   1   4   94.99    7.90
   7  -1   4  140.09    8.90
   7   1  -4  139.79    8.90
   7  -1   4  144.99    8.70
   7   1  -4  138.59    9.00
   7   1  -4  135.79    9.00
   7  -1   4  154.88   10.20
   7  -1   4  142.39    9.80
   7  -1   4  150.38    8.60
   7  -1   4  158.98   11.00
   7   1   4  153.68   10.50
   7   1   4  143.29   10.70
   7  -1  -4  145.99    8.70
   7   1   4  146.99    9.20
   7  -1  -4  141.39    8.90
   7   1   4  148.89    9.10
   7  -1  -4  157.08    9.10
   7   1   4  153.68    8.60
   7   1   4  139.89    9.70
   8  -1   4    6.60    1.90
   8  -1   4    5.00    1.80
   8  -1   4    3.90    0.90
   8  -1   4    4.70    1.50
   8   1  -4    5.00    1.30
   8   1  -4    4.50    1.30
   8   1  -4    5.20    1.30
   8   1   4    1.80    1.10
   8   1   4    2.00    1.10
   8   1   4    3.20    1.00
   8   1   4    4.20    1.70
   8   1   4    3.20    1.10
   8  -1  -4    3.50    1.00
   9  -1   4  795.32   41.10
   9   1  -4  796.42   40.00
   9   1   4  902.61   40.10
   9  -1  -4  810.02   40.00
   0   2  -4  407.06   25.00
   0   2  -4  470.75   21.30
   0   2   4  394.86   19.80
   0  -2  -4  357.86   25.20
   1   2  -4 3827.12  181.88
   1  -2   4 3670.83  179.88
  -1  -2  -4 3582.74  186.48
   1  -2  -4 3953.00  179.28
  -1   2  -4 3968.40  186.18
   2  -2   4 1854.51   89.69
   2   2  -4 1939.21   96.49
   2   2   4 1669.63   94.99
  -2   2  -4 1874.71   90.89
   2   2   4 1995.30   91.69
   2  -2  -4 1882.61   96.89
   2   2   4 1973.60   90.29
   3   2  -4 1306.97   66.19
   3  -2   4 1326.67   56.79
   3  -2   4 1151.98   57.09
   3   2  -4 1153.08   63.89
   3   2  -4 1102.99   57.79
   3   2   4 1129.59   58.49
   3   2   4 1100.49   60.29
   3  -2  -4 1217.78   64.39
   4  -2   4  603.74   30.20
   4   2  -4  555.44   35.90
   4   2  -4  625.54   37.20
   4   2   4  572.94   31.60
   4  -2  -4  653.93   36.70
   4   2   4  610.04   30.60
   5   2  -4  108.59    7.40
   5   2  -4  108.69    7.60
   5  -2   4  122.19    7.10
   5  -2   4  114.89    6.90
   5  -2   4  113.29   10.50
   5   2  -4  117.69    7.90
   5  -2   4  125.69    7.20
   5   2  -4  122.29    7.40
   5  -2   4  115.59    8.30
   5   2  -4  112.79    8.80
   5  -2   4  120.69    8.70
   5  -2   4  115.79    7.60
   5   2  -4  104.69    8.60
   5   2   4  130.29    8.00
   5   2   4  115.49    8.90
   5   2   4  121.69    8.70
   5  -2  -4  127.99    8.00
   5   2   4  119.49    7.90
   5  -2  -4  113.09    9.50
   5  -2  -4  114.59    7.20
   5  -2  -4  116.29    7.00
   5   2   4  127.69    9.00
   5   2   4  112.09    7.60
   5   2   4  122.39    7.80
   5   2   4  114.69    7.00
   6   2  -4  423.76   21.80
   6   2  -4  387.56   22.30
   6  -2   4  416.16   21.30
   6  -2   4  408.46   23.70
   6   2  -4  388.26   22.10
   6  -2   4  417.96   21.20
   6  -2   4  411.76   21.50
   6   2  -4  388.36   21.70
   6  -2   4  433.36   22.40
   6  -2   4  482.65   22.80
   6  -2   4  416.96   23.00
   6   2   4  406.36   21.20
   6  -2  -4  395.36   21.50
   6   2   4  409.26   22.00
   6  -2  -4  444.26   22.40
   6   2   4  398.96   23.90
   6   2   4  423.76   23.70
   6   2   4  405.46   23.50
   6  -2  -4  403.76   21.20
   6   2   4  410.16   22.20
   7  -2   4  193.98   12.20
   7   2  -4  179.38   10.70
   7  -2   4  183.78   11.30
   7  -2   4  180.18   12.40
   7   2  -4  176.18   10.70
   7   2  -4  170.98   11.00
   7  -2   4  197.88   10.50
   7  -2   4  177.48   10.20
   7  -2  -4  190.98   10.40
   7   2   4  172.18   12.20
   7  -2  -4  181.38   10.50
   7   2   4  191.58   12.80
   7  -2  -4  186.08   12.20
   7   2   4  176.88   10.90
   7   2   4  188.08   10.20
   7   2   4  185.88   11.30
   8   2  -4  237.38   13.90
   8   2  -4  253.47   14.00
   8   2  -4  253.57   14.10
   8  -2   4  268.87   15.70
   8  -2   4  258.67   13.60
   8  -2   4  258.47   15.10
   8  -2  -4  252.17   13.80
   8   2   4  269.77   14.10
   8   2   4  282.07   15.80
   8   2   4  282.37   13.60
   8   2   4  252.57   14.30
   9  -2   4   12.90    1.60
   9   2  -4   18.90    1.60
   9   2  -4   13.70    1.40
   9   2   4   16.10    1.50
   9  -2  -4   15.00    1.30
   9   2   4   17.80    1.90
   0   3  -4 1786.92   98.29
   0   3  -4 2052.79   93.09
   1   3  -4  641.04   37.30
   1   3  -4  642.94   32.50
   1   3  -4  630.44   30.40
  -1  -3  -4  574.14   37.80
   1   3   4  599.94   31.20
   1  -3  -4  617.74   38.10
  -1   3  -4  669.13   31.70
  -1   3  -4  585.84   36.90
   2   3  -4 1229.98   64.89
   2   3  -4 1303.47   62.49
   2  -3   4 1152.18   61.79
   2   3  -4 1444.26   70.99
   2   3   4 1197.68   70.69
   2   3   4 1335.57   62.29
   2   3   4 1443.16   64.19
  -2   3  -4 1222.58   63.39
   3   3  -4  519.35   27.10
   3   3  -4  545.65   37.00
   3   3  -4  555.24   34.50
   3  -3   4  502.45   26.20
   3   3  -4  495.35   29.60
   3   3   4  535.35   26.80
   3   3   4  587.84   29.00
   3  -3  -4  562.24   34.80
  -3   3  -4  533.95   28.00
   3   3   4  458.75   32.20
   4   3  -4  431.56   26.10
   4   3  -4  487.45   33.20
   4  -3   4  490.25   27.10
   4  -3   4  522.45   25.70
   4   3  -4  528.65   35.60
   4   3  -4  501.15   26.70
   4  -3   4  488.25   25.20
   4  -3   4  478.05   26.70
   4  -3  -4  536.25   33.60
   4   3   4  519.45   27.30
   4   3   4  534.85   26.50
  -4   3  -4  523.95   27.60
   4   3   4  541.55   26.80
   4   3   4  492.45   27.80
   4   3   4  512.15   27.10
   4   3   4  563.64   26.40
   4   3   4  470.15   26.10
   4   3   4  506.65   26.20
   5  -3   4  326.17   18.50
   5   3  -4  265.17   20.30
   5   3  -4  297.27   17.10
   5   3  -4  291.47   17.20
   5  -3   4  322.97   16.90
   5  -3   4  355.26   17.20
   5   3  -4  294.77   16.70
   5  -3   4  274.67   17.60
   5   3  -4  306.07   16.70
   5  -3   4  307.67   16.00
   5  -3  -4  305.87   21.20
   5   3   4  282.37   18.60
   5   3   4  311.07   16.00
  -5   3  -4  324.97   18.90
   5  -3  -4  334.37   17.70
   5   3   4  293.57   17.00
   5   3   4  318.77   17.30
   5   3   4  315.27   18.30
   5   3   4  339.37   18.40
   5   3   4  329.67   17.40
   5  -3  -4  297.27   16.30
   6  -3   4  168.38   11.60
   6  -3   4  157.88   13.60
   6   3  -4  163.28    9.90
   6   3  -4  162.58   10.30
   6   3  -4  159.68   10.40
   6   3  -4  165.68    9.80
   6  -3   4  169.98    9.30
   6  -3   4  159.68   11.00
   6   3   4  152.88   11.30
   6   3   4  169.78    9.20
  -6   3  -4  160.88   11.90
   6   3   4  161.58   11.30
   6   3   4  165.08   10.30
   6   3   4  158.78   10.40
   6  -3  -4  163.98    9.50
   6  -3  -4  181.48   10.70
   6   3   4  158.28   12.20
   7   3  -4   36.80    3.30
   7   3  -4   34.10    3.60
   7  -3   4   40.40    4.60
   7  -3   4   34.30    2.90
   7   3  -4   37.80    3.40
   7  -3   4   40.40    4.40
   7   3   4   29.70    4.00
   7  -3  -4   35.50    3.50
   7   3   4   37.60    3.60
  -7   3  -4   34.70    5.40
   7   3   4   34.80    2.80
   7   3   4   43.80    4.10
   7  -3  -4   36.00    3.10
   8  -3   4    1.70    1.00
   8  -3   4    1.40    1.20
   8   3  -4    1.80    0.80
   8   3  -4    3.50    1.00
   8   3   4    0.30    0.70
   8   3   4    1.20    0.60
   8   3   4    2.00    1.20
   8   3   4    2.30    1.00
   9  -3   4   75.89    5.30
   9   3  -4   90.99    5.00
   9   3  -4   97.69    4.90
   9   3   4   95.79    5.10
   9  -3  -4   87.69    4.80
   9   3   4   95.99    5.30
   0  -4  -4  235.38   20.60
   0   4  -4  248.48   20.00
   0   4   4  252.07   13.70
   0   4  -4  242.18   14.20
   0   4   4  211.78   12.90
  -1  -4  -4  359.36   28.50
   1   4  -4  389.16   19.40
   1   4  -4  404.66   27.80
   1   4  -4  374.26   21.60
  -1   4   4  359.76   19.70
   1  -4  -4  398.06   28.60
   1   4   4  344.27   20.30
   1   4   4  409.86   19.70
  -1   4  -4  420.86   22.10
   2   4  -4  536.75   33.20
   2  -4   4  463.55   23.20
   2   4  -4  443.66   23.80
   2   4  -4  434.26   26.40
  -2   4  -4  488.35   25.60
   2   4   4  424.86   24.70
   2  -4  -4  486.35   33.20
   3  -4   4  396.26   20.10
   3   4  -4  450.55   30.20
   3  -4   4  320.97   24.30
   3   4   4  366.46   29.70
   3   4   4  373.76   20.70
  -3   4  -4  428.16   22.60
   3   4   4  399.26   22.30
   3  -4  -4  413.96   29.90
   4   4  -4  585.24   30.30
   4  -4   4  581.94   30.70
   4   4  -4  590.14   39.10
   4  -4   4  581.54   30.50
   4  -4   4  619.64   29.20
   4  -4   4  565.24   28.40
   4   4  -4  561.44   29.10
   4   4  -4  539.75   29.10
   4   4  -4  559.94   29.90
   4   4   4  561.74   29.70
   4   4   4  563.04   35.30
   4  -4  -4  656.93   40.00
  -4  -4   4  534.75   28.70
   4   4   4  567.14   29.60
   4   4   4  561.14   30.60
   4   4   4  592.64   31.70
  -4   4  -4  582.34   31.70
   5   4  -4   16.30    2.30
   5  -4   4   13.40    3.00
   5   4  -4   19.50    2.40
   5  -4   4   16.60    2.10
   5  -4   4   19.20    3.60
   5  -4   4   19.40    3.00
   5  -4  -4   19.20    2.80
  -5   4  -4   17.50    3.40
   5   4   4   25.80    4.50
   5   4   4   12.60    3.50
   5   4   4   18.90    2.40
   5   4   4   19.40    6.00
  -5  -4   4   15.60    2.10
   5  -4  -4   18.60    2.10
   6  -4   4   20.60    2.10
   6  -4   4   27.10    3.60
   6  -4   4   22.60    3.40
   6   4  -4   21.20    2.90
   6   4  -4   21.10    2.50
   6   4  -4   22.80    2.50
   6   4  -4   22.20    2.80
   6   4   4   20.70    2.70
   6   4   4   24.80    3.00
   6  -4  -4   25.00    3.10
   6   4   4   21.10    4.20
   6   4   4   22.90    3.30
   6  -4  -4   22.20    2.30
  -6   4  -4   15.80    3.70
   7   4  -4  183.28   10.70
   7   4  -4  192.68   10.70
   7   4  -4  178.78   11.40
   7  -4   4  187.58   12.40
   7  -4   4  201.38   12.70
   7  -4  -4  184.08   10.20
  -7   4  -4  186.48   13.50
   7   4   4  178.48   12.20
   7  -4  -4  211.28   11.40
   7   4   4  204.88   11.90
   7   4   4  196.08   11.40
   8  -4   4  202.88   11.70
   8   4  -4  190.58   11.00
   8   4  -4  209.98   10.80
   8  -4   4  188.28   11.40
   8   4   4  202.18   11.20
   8  -4  -4  187.38   10.50
   8   4   4  210.48   11.00
   0  -5  -4 1838.02  105.89
   0   5   4 1991.20   93.39
   0   5  -4 1853.41   94.79
   0   5  -4 1996.90  105.39
   1   5  -4   83.19   11.50
  -1   5   4   74.69    5.30
  -1  -5  -4   62.29   11.20
   1   5  -4   65.59    6.60
  -1   5  -4   71.69    6.40
   1  -5  -4   70.09   11.50
   1   5   4   81.39    5.90
   1   5   4   70.39    5.80
   2  -5   4   55.89    4.10
   2   5  -4   73.69    7.40
  -2   5   4   58.19    4.50
   2   5  -4   71.79   10.90
  -2   5  -4   61.99    6.20
   2   5   4   60.49    5.50
  -2  -5   4   58.79    4.10
   2  -5  -4   69.69   11.60
   3  -5   4   11.50    2.10
   3   5  -4   14.30    5.80
  -3  -5  -4   13.90    1.70
   3   5  -4   14.50    2.30
  -3   5   4   12.10    2.30
   3   5  -4   10.00    3.20
   3   5   4   16.90    2.30
   3  -5  -4    9.00    5.60
   3   5   4   12.50    1.80
  -3  -5   4   10.00    1.60
   3   5   4   11.30    2.20
   4   5  -4  556.84   30.90
   4  -5   4  622.34   30.10
   4   5  -4  601.34   41.90
   4   5  -4  591.44   30.10
   4   5  -4  564.94   29.80
   4  -5   4  561.94   31.40
  -4  -5  -4  555.54   29.50
   4  -5   4  590.74   31.60
   4   5  -4  594.34   31.30
   4   5   4  591.84   32.70
   4   5   4  612.54   30.90
   4   5   4  583.34   30.70
   4  -5  -4  618.44   31.40
  -4   5  -4  572.34   32.80
   4  -5  -4  668.53   42.90
  -4  -5   4  599.74   29.70
   4   5   4  588.74   31.60
   5   5  -4  547.05   28.60
   5   5  -4  518.25   29.50
   5  -5   4  585.14   30.60
   5   5  -4  593.94   28.40
   5   5  -4  546.15   28.60
   5  -5   4  577.94   30.60
  -5  -5   4  544.45   28.10
   5   5   4  509.35   29.30
   5   5   4  574.94   31.80
  -5   5  -4  574.44   31.90
   5   5   4  574.54   29.40
   5   5   4  540.15   30.10
   5  -5  -4  584.64   29.90
   6   5  -4   30.40    2.80
   6   5  -4   27.30    2.70
   6  -5   4   32.70    4.10
   6  -5   4   24.90    4.40
   6   5  -4   20.20    3.90
   6   5   4   24.80    4.00
  -6  -5   4   27.40    2.50
   6  -5  -4   31.30    3.40
  -6   5  -4   27.70    5.40
   6  -5  -4   26.60    2.20
   6   5   4   26.50    4.60
  -7   5   4   36.70    5.60
   7   5  -4   43.30    2.90
   7   5  -4   34.90    2.90
   7   5  -4   36.60    3.50
   7  -5   4   35.20    3.90
   7  -5   4   41.50    4.10
   7  -5  -4   44.90    3.60
   7   5   4   33.70    3.60
   7   5   4   36.80    3.90
   7  -5  -4   38.30    2.60
   7   5   4   40.80    3.60
   8   5  -4   55.69    4.00
   8  -5   4   54.59    3.90
   8  -5   4   43.80    3.90
   8   5   4   47.20    3.50
   8   5   4   50.59    3.80
   0   6  -4    6.20    4.30
   0  -6  -4    2.00    0.80
   0   6   4    1.80    1.60
   0  -6  -4   -1.00    3.30
   0   6  -4    2.30    1.40
   0  -6   4    1.40    0.70
  -1   6   4  245.78   14.00
   1  -6   4  234.18   12.70
   1   6  -4  255.07   24.80
  -1  -6  -4  225.28   12.80
   1  -6   4  244.88   12.90
  -1   6   4  254.47   15.00
   1   6  -4  234.18   16.50
  -1  -6   4  230.68   12.80
  -1   6  -4  274.77   16.40
   1  -6  -4  232.68   12.70
   1  -6  -4  256.07   25.70
   1   6   4  216.48   13.80
   1   6   4  224.98   14.30
   2   6  -4  312.67   22.00
   2   6  -4  376.96   31.20
   2  -6   4  330.77   17.20
  -2   6   4  349.96   18.60
  -2  -6  -4  347.17   17.80
  -2   6   4  348.17   20.30
   2  -6   4  333.87   17.70
   2   6  -4  286.57   17.60
  -2   6  -4  366.26   21.40
   2   6   4  346.57   19.90
   2  -6  -4  336.87   17.40
   2   6   4  307.37   18.80
   2  -6  -4  378.66   31.90
  -2  -6   4  361.46   17.80
   3   6  -4  370.86   21.40
   3   6  -4  379.36   26.40
   3  -6   4  425.56   21.60
   3   6  -4  462.45   35.50
  -3  -6  -4  437.66   21.40
   3  -6   4  402.76   22.80
   3  -6  -4  408.06   20.70
   3   6   4  410.36   22.50
   3   6   4  399.76   22.70
  -3   6  -4  444.16   25.50
   3   6   4  404.86   24.00
  -3  -6   4  435.26   21.50
   3   6   4  387.26   22.00
   3  -6  -4  470.85   36.20
  -4  -6  -4 1028.60   49.60
   4  -6   4 1041.00   50.29
   4  -6   4 1033.70   51.69
   4  -6   4  991.40   51.69
   4   6  -4  950.90   51.09
   4   6  -4  978.50   49.90
  -4   6  -4  977.30   53.29
   4   6   4  991.90   51.39
   4   6   4 1020.20   50.89
   4   6   4  992.70   50.79
   4  -6  -4 1089.19   51.69
   4   6   4 1024.00   53.09
  -4  -6   4 1046.60   49.70
   5   6  -4   97.59   14.30
  -5  -6  -4  126.39    7.40
   5   6  -4  119.29    8.60
   5  -6   4  131.29    9.30
   5   6  -4  115.79    7.60
   5  -6   4  130.89    9.30
   5  -6  -4  136.59    9.10
  -5  -6   4  125.89    7.50
  -5   6  -4  122.59   10.40
   5   6   4  118.79    8.60
   5   6   4  121.79    8.80
   5   6   4  116.09   10.40
   5   6   4  131.79    8.60
   6   6  -4   39.20    4.00
  -6   6   4   44.00    5.50
   6   6  -4   39.40    3.30
   6  -6   4   45.10    4.80
   6  -6   4   46.00    4.50
  -6  -6   4   45.30    3.30
   6  -6  -4   42.50    4.00
   6   6   4   43.80    4.00
  -6   6  -4   41.50    5.40
   6   6   4   35.50    3.80
   6   6   4   40.90    4.10
   7  -6   4   57.99    4.80
   7   6  -4   47.20    4.00
   7  -6   4   52.99    4.20
   7   6  -4   52.69    3.50
   7   6   4   47.90    4.00
   7   6   4   55.19    4.10
   7  -6  -4   59.29    3.90
   7   6   4   51.49    4.20
   0  -7   4   29.20    2.70
   0   7   4   31.10    4.60
   0   7   4   20.60    3.80
   0   7  -4   29.90    4.90
   0   7  -4   33.60   12.10
   0  -7  -4   23.80    2.90
  -1   7   4  242.48   14.60
   1  -7   4  210.98   11.90
   1   7  -4  202.18   16.10
  -1  -7  -4  227.48   12.10
   1  -7   4  226.68   12.20
   1   7  -4  227.68   26.50
   1   7   4  197.48   12.70
  -1  -7   4  213.98   12.00
   1  -7  -4  215.38   27.20
   1  -7  -4  210.58   12.60
   1   7   4  227.48   14.00
   2  -7   4  863.71   41.90
  -2   7   4  844.02   44.70
   2   7  -4  743.93   41.50
   2   7  -4  806.22   47.50
  -2  -7  -4  831.12   41.70
   2   7  -4  957.50   61.09
   2   7   4  761.52   43.80
  -2   7  -4  875.21   46.00
   2   7   4  832.02   42.90
   2  -7  -4  875.21   41.20
  -2  -7   4  857.81   41.80
   2  -7  -4  908.41   62.79
   3  -7   4  597.74   30.50
  -3  -7  -4  609.34   30.10
   3   7  -4  663.13   47.20
   3   7  -4  549.54   30.00
   3   7  -4  538.85   35.50
   3  -7   4  573.64   31.50
   3   7  -4  557.64   31.40
   3  -7   4  591.44   31.90
  -3   7   4  611.84   33.50
   3   7   4  574.64   30.90
   3  -7  -4  636.24   47.20
   3   7   4  599.44   31.30
  -3   7  -4  668.53   34.80
   3   7   4  602.44   33.00
  -3  -7   4  605.54   30.20
   3   7   4  594.64   31.30
   4   7  -4  596.44   45.30
   4   7  -4  525.85   32.40
  -4   7   4  594.54   34.60
  -4  -7  -4  648.34   31.00
   4  -7   4  678.63   33.20
   4  -7   4  612.04   33.20
   4   7  -4  577.34   32.40
  -4   7  -4  620.64   35.10
   4   7   4  600.34   32.30
   4   7   4  608.14   32.20
   4   7   4  653.03   32.50
   4  -7  -4  652.33   46.40
  -4  -7   4  639.04   31.20
   4  -7  -4  661.73   33.00
   5   7  -4   53.09    5.00
   5  -7   4   73.39    6.20
  -5  -7  -4   67.29    4.40
   5  -7   4   66.69    5.60
   5   7  -4   58.69    4.30
  -5   7   4   57.89    6.70
  -5   7  -4   70.19    7.10
   5   7   4   60.19    5.00
   5   7   4   66.59    5.20
   5  -7  -4   65.59    5.50
  -5  -7   4   60.09    4.30
   5   7   4   55.49    5.00
   6  -7   4   14.20    2.10
   6   7  -4    8.70    1.60
  -6  -7  -4   11.80    2.50
   6  -7   4   11.50    2.10
   6   7  -4   11.40    1.90
   6   7   4   10.90    1.80
   6   7   4   11.50    1.60
   6  -7  -4   10.50    1.80
   6   7   4   16.40    2.20
  -6  -7   4   11.90    1.40
   7  -7   4  147.49    9.20
   7   7  -4  174.88    9.20
   7   7   4  169.08    9.30
   7   7   4  164.68    9.00
   0  -8   4  446.36   21.80
   0  -8  -4  400.86   21.30
   0   8  -4  406.86   26.20
   0  -8   4  404.36   21.30
   1   8  -4  159.98   23.60
   1  -8   4  127.39    7.40
   1   8  -4  111.09   12.30
   1  -8   4  128.39    8.40
  -1  -8  -4  128.49    7.70
  -1   8   4  127.19   11.00
  -1   8  -4  129.99   11.90
   1  -8  -4  106.59   22.70
  -1  -8   4  126.99    7.70
   1  -8  -4  118.99    7.40
   2   8  -4   36.60   12.60
  -2  -8  -4   37.10    3.00
  -2   8   4   29.80    4.80
   2  -8   4   31.30    5.40
   2   8  -4   25.40    6.60
   2  -8  -4   24.60   12.00
   2   8   4   25.80    3.10
   2  -8  -4   33.90    2.60
  -2  -8   4   29.50    2.80
  -2   8  -4   32.20    5.00
  -3   8   4  107.49    9.30
   3   8  -4  107.89   18.50
  -3  -8  -4  104.49    6.70
   3  -8   4  106.49    8.00
   3  -8   4  116.19    8.00
   3   8   4  110.69    7.60
   3   8   4  109.39    7.70
   3  -8  -4  116.19   19.50
  -3   8  -4  113.19   10.00
   3   8   4  109.39   21.80
  -3  -8   4  101.49    6.70
   4   8  -4   17.90    2.50
  -4  -8  -4   15.90    1.80
   4  -8   4   15.40    2.60
  -4   8   4   12.80    3.50
   4  -8   4   15.30    2.30
  -4  -8   4   15.40    1.90
   4  -8  -4   16.80    2.50
   4   8   4   14.00    2.30
   4   8   4   16.30    2.40
  -4   8  -4   10.80    3.80
   5  -8   4  386.86   20.20
   5  -8   4  364.06   20.60
   5   8  -4  355.96   20.10
  -5  -8  -4  369.26   19.10
  -5  -8   4  379.86   19.30
   5   8   4  370.26   20.00
   5  -8  -4  411.26   20.40
   5   8   4  393.36   20.70
   6   8  -4  204.58   11.70
   6  -8   4  210.38   12.00
   6   8   4  210.98   11.30
  -6  -8   4  211.28   10.80
   6  -8  -4  220.08   11.30
   0  -9   4    0.90    0.50
   0  -9  -4    1.70    0.70
   0   9  -4   -0.80    3.50
   1  -9   4  241.28   12.10
   1   9  -4  207.68   17.50
  -1  -9  -4  233.28   12.60
  -1   9  -4  219.18   16.80
  -1  -9   4  243.08   12.70
   1  -9  -4  246.28   12.40
  -2  -9  -4   77.99    5.30
   2  -9   4   82.69    6.20
   2  -9   4   73.69    6.10
  -2  -9   4   84.79    5.40
   2  -9  -4   82.39    4.80
   2   9   4   87.49    6.20
  -2   9  -4   89.39    8.80
   2   9   4   76.49    5.70
   3  -9   4    3.50    1.20
   3  -9   4    2.10    1.00
   3   9  -4    2.50    1.20
  -3  -9  -4    7.00    1.20
   3  -9  -4    5.00    1.40
   3   9   4    3.90    1.20
  -3  -9   4    2.00    0.90
   3   9   4    5.10    1.40
  -3   9  -4    6.30    3.10
  -4  -9  -4  175.88    9.10
   4  -9   4  158.88    9.60
   4   9  -4  171.28   10.00
   4  -9   4  160.08   10.20
   4   9   4  159.08    9.50
   4  -9  -4  170.18   10.00
   4   9   4  166.58    9.60
  -4  -9   4  165.88    9.10
   5  -9   4  260.17   15.00
  -5  -9  -4  283.07   13.90
   5   9  -4  292.37   14.70
   5   9   4  283.27   14.30
  -5  -9   4  277.17   13.90
   5  -9  -4  272.67   14.30
   5   9   4  259.77   15.20
   0 -10   4  218.78   11.20
   0 -10  -4  216.68   11.50
   1 -10   4    9.60    1.60
  -1 -10  -4   13.50    1.80
   1 -10   4   12.80    1.80
   1 -10  -4   11.30    1.20
   1  10   4   10.80    1.50
  -1 -10   4   12.30    1.30
   1  10   4   13.90    1.90
   2  10  -4   45.30    3.70
   2 -10   4   41.20    3.60
  -2 -10  -4   43.20    3.10
   2 -10   4   43.70    3.70
   2  10   4   45.90    3.40
   2  10   4   45.40    3.50
  -2 -10   4   46.10    3.10
   2 -10  -4   46.90    3.80
   3 -10   4   19.90    2.20
   3 -10   4   19.30    2.30
   3  10  -4   24.20    2.40
  -3 -10  -4   26.20    1.90
  -3 -10   4   25.30    1.90
   3  10   4   24.50    2.10
   3  10   4   19.50    1.90
   3 -10  -4   19.00    2.40
   4 -10   4  108.39    6.00
  -4 -10  -4  104.39    5.40
   4  10  -4  101.09    5.80
   4 -10  -4   93.99    5.60
   4  10   4   90.59    5.40
  -4 -10   4   93.89    5.30
   0 -11   4    2.50    1.00
   0 -11   4    2.20    0.70
   0  11   4    4.30    0.80
   0  11   4    3.60    1.00
   0  11  -4    3.00    0.90
  -1 -11  -4   54.09    2.70
   1  11  -4   55.79    3.40
   1 -11   4   47.00    3.10
  -1  11   4   40.00    2.80
   1  11   4   41.60    2.80
  -1 -11   4   43.90    3.20
   0   0  -5    8.10    2.50
   1   0  -5  319.57   23.00
   1   0   5  380.06   18.50
  -1   0   5  384.26   18.10
   1   0   5  382.26   18.80
   1   0   5  413.86   23.00
  -1   0  -5  407.46   19.00
   1   0  -5  351.36   20.10
   2   0   5  563.04   28.00
   2   0   5  617.64   31.10
   2   0   5  530.35   28.30
  -2   0  -5  571.24   27.90
   3   0   5  826.72   39.80
   3   0   5  864.11   40.40
   3   0  -5  717.43   45.40
  -3   0  -5  834.72   39.70
   4   0   5   36.50    3.40
   4   0  -5   27.90    5.60
   4   0   5   31.40    2.90
  -4   0  -5   31.90    3.00
   5   0  -5   81.49    5.20
   5   0   5   71.99    5.20
   5   0   5   78.19    5.30
   5   0   5   77.79    6.20
   5   0   5   74.49    6.40
   5   0   5   78.09    5.00
   5   0  -5   66.99    5.20
   5   0  -5   74.39    7.60
   5   0   5   72.09    5.70
   5   0   5   78.39    5.90
   5   0   5   79.89    6.20
  -5   0  -5   69.89    5.50
   5   0  -5   78.19    5.70
   6   0   5  174.08   11.10
   6   0   5  152.18    9.70
   6   0   5  146.69   11.20
   6   0   5  159.48    9.70
   6   0  -5  161.08    9.80
   6   0   5  154.38   11.30
   6   0   5  160.98    9.20
   6   0  -5  153.28    9.70
   6   0   5  180.28   10.80
   6   0   5  164.78   10.90
   7   0   5  173.28    9.80
   7   0   5  170.58   12.20
   7   0  -5  163.38    9.80
   7   0   5  167.28   11.00
   7   0  -5  158.38    9.90
   7   0   5  174.08   11.20
   7   0   5  169.68   10.00
   7   0   5  169.28    9.50
   7   0  -5  154.88    9.80
   8   0  -5  461.25   25.30
   8   0  -5  501.05   25.10
   8   0   5  518.15   26.50
   8   0   5  513.95   25.10
   8   0   5  501.95   24.90
   8   0   5  493.45   27.30
   8   0   5  501.75   25.40
   9   0  -5   25.40    2.10
   0   1  -5  799.82   43.30
   0  -1   5  768.42   37.40
   0   1   5  796.02   37.40
   0  -1  -5  702.53   43.20
   0   1  -5  848.32   39.00
  -1  -1  -5 1824.52   99.79
   1  -1   5 1921.81   92.29
  -1   1   5 1940.51   91.79
   1   1  -5 2226.68   99.59
   1   1   5 1831.32   97.79
  -1   1  -5 1873.81   97.99
   1  -1  -5 1977.80   99.29
   1   1   5 1945.21   92.29
   2  -1   5  517.35   23.80
   2  -1   5  500.75   23.70
   2   1  -5  444.26   26.00
   2   1  -5  460.25   29.40
   2   1   5  486.65   27.60
   2  -1  -5  437.56   29.40
   2   1   5  468.45   23.70
  -2   1  -5  517.85   24.30
   2   1   5  478.85   24.40
   3  -1   5 2484.15  118.29
   3   1  -5 2222.68  124.99
   3  -1  -5 2461.15  125.69
   3   1   5 2679.73  118.69
  -3   1  -5 2551.04  118.99
   4   1  -5 1282.17   66.79
   4   1  -5 1066.39   64.69
   4  -1   5 1200.68   58.79
   4   1   5 1224.98   59.99
  -4   1  -5 1215.18   59.39
   4  -1  -5 1291.67   65.89
   4   1   5 1163.68   58.89
   5  -1   5  177.88   11.10
   5  -1   5  174.98    9.90
   5  -1   5  187.28   11.80
   5   1  -5  157.68   10.20
   5  -1   5  193.08   11.30
   5   1  -5  177.78   10.70
   5   1  -5  200.48   10.30
   5  -1   5  174.28    9.80
   5  -1   5  184.78   10.10
   5   1  -5  160.88   10.20
   5  -1   5  173.28   10.60
   5  -1   5  192.88   10.80
   5   1  -5  166.78   13.10
   5   1  -5  174.08   12.90
   5   1   5  166.88   11.40
   5   1   5  185.48   11.80
   5   1   5  176.18   10.80
   5   1   5  180.28   11.50
   5   1   5  164.18   10.20
   5  -1  -5  181.08   10.10
   5   1   5  179.68   10.80
   5  -1  -5  165.18   10.10
  -5   1  -5  159.58   11.70
   5  -1  -5  154.88   10.30
   5   1   5  188.78   10.50
   5   1   5  187.08    9.80
   5  -1  -5  172.18   13.10
   6  -1   5  523.55   26.60
   6  -1   5  554.74   26.80
   6  -1   5  518.15   28.10
   6   1  -5  500.45   27.40
   6   1  -5  548.25   26.90
   6   1  -5  500.05   27.10
   6  -1   5  537.75   29.20
   6  -1   5  552.84   26.50
   6  -1   5  562.54   28.20
   6  -1   5  464.25   29.50
   6   1  -5  496.25   27.00
   6   1   5  503.55   31.80
   6   1   5  548.75   27.20
   6   1   5  515.85   28.50
   6  -1  -5  483.85   26.80
  -6   1  -5  505.15   30.90
   6   1   5  512.95   27.80
   6   1   5  551.24   29.30
   6   1   5  535.75   26.40
   6   1   5  494.05   26.90
   6  -1  -5  514.05   26.80
   6  -1  -5  552.94   26.90
   6   1   5  534.95   27.80
   7  -1   5  586.14   30.00
   7  -1   5  525.05   29.50
   7  -1   5  606.14   28.70
   7  -1   5  592.74   31.20
   7  -1   5  583.64   28.30
   7   1  -5  557.04   28.70
   7   1  -5  530.15   28.60
   7  -1   5  562.24   28.10
   7   1   5  543.25   33.90
   7   1   5  569.54   28.10
   7   1   5  557.34   28.60
   7   1   5  544.55   29.70
   7   1   5  556.04   31.20
   7  -1  -5  556.54   28.60
   7   1   5  537.85   30.20
   7   1   5  547.55   28.80
   7  -1  -5  554.04   28.20
   8  -1   5   11.00    1.50
   8   1  -5   10.30    1.70
   8   1  -5    9.60    1.50
   8  -1   5    8.70    1.80
   8  -1   5   12.20    2.30
   8   1   5   12.70    1.70
   8   1   5   13.70    2.30
   8  -1  -5   10.60    1.60
   8   1   5   12.10    2.90
   8   1   5   14.10    1.50
   9  -1   5  345.67   18.00
   9   1  -5  340.37   17.30
   9  -1  -5  346.37   17.30
   0   2   5 3504.95  173.08
   0   2  -5 3825.92  180.38
   0   2  -5 3940.01  174.88
   0  -2  -5 3361.76  180.68
   1   2  -5  273.87   19.00
  -1  -2  -5  222.18   18.60
   1  -2   5  275.07   12.60
   1   2  -5  244.18   15.00
   1  -2   5  279.67   12.60
   1  -2   5  236.38   13.00
   1   2   5  257.27   13.20
  -1   2  -5  278.37   15.40
   1  -2  -5  277.77   12.40
   1  -2  -5  232.98   18.90
   1   2   5  271.27   14.10
   2   2   5 4903.11  230.38
   2   2   5 4519.25  224.48
   3  -2   5  160.98    9.50
   3  -2   5  189.58    9.10
   3   2  -5  154.68   15.00
   3   2  -5  189.78   17.40
   3   2   5  175.48   12.90
   3   2   5  178.38   11.00
   3   2   5  175.38   10.00
   3  -2  -5  178.48   15.70
  -3   2  -5  174.88   10.60
   4  -2   5  679.43   33.80
   4   2  -5  610.24   40.70
   4   2  -5  754.52   43.30
   4  -2  -5  689.93   41.10
  -4   2  -5  650.83   34.80
   4   2   5  680.53   34.20
   5   2  -5  103.99   11.00
   5  -2   5  117.69    7.70
   5   2  -5  111.09    7.60
   5  -2   5  130.59    8.10
   5   2  -5   99.59    7.30
   5  -2   5  117.49    8.70
   5   2  -5   93.99   10.10
   5  -2   5  124.09    7.10
   5  -2   5  116.09    8.20
   5  -2   5  118.89    7.00
   5   2  -5  116.69    7.20
   5   2  -5  111.79    7.60
   5  -2   5  110.99    6.80
   5  -2  -5  122.49    7.00
   5   2   5  112.59    7.90
   5   2   5  116.09    6.90
   5  -2  -5  116.09   11.10
   5   2   5  111.99    7.50
   5   2   5  120.79    9.20
   5   2   5  124.99    7.80
   5   2   5  121.69    8.00
   5  -2  -5  123.49    7.80
  -5   2  -5  112.69    8.50
   5   2   5  126.79    8.80
   5   2   5  127.89    8.90
   5  -2  -5  114.69    7.20
   6  -2   5  244.38   14.50
   6  -2   5  258.97   13.30
   6   2  -5  243.38   13.50
   6  -2   5  261.07   14.40
   6   2  -5  234.08   14.00
   6   2  -5  230.68   13.70
   6   2  -5  234.58   14.10
   6  -2   5  248.28   13.40
   6  -2   5  254.87   13.20
   6  -2   5  233.08   14.80
   6  -2   5  245.88   15.60
   6   2   5  241.98   14.10
   6   2   5  237.98   13.00
   6   2   5  253.77   14.60
  -6   2  -5  251.87   16.60
   6  -2  -5  242.18   13.10
   6   2   5  248.98   13.90
   6   2   5  248.48   16.00
   6  -2  -5  236.58   14.70
   6   2   5  243.68   15.50
   6  -2  -5  225.48   13.40
   6   2   5  248.28   15.60
   7  -2   5   33.40    4.20
   7  -2   5   30.20    2.70
   7   2  -5   27.70    3.40
   7  -2   5   27.70    4.70
   7  -2   5   29.60    3.60
   7   2  -5   33.50    3.20
   7   2  -5   22.60    3.00
   7   2   5   31.80    3.70
   7   2   5   24.70    3.70
   7  -2  -5   25.10    2.80
   7   2   5   28.00    3.80
   7   2   5   30.00    3.10
   7   2   5   25.30    3.00
   8  -2   5   69.69    5.80
   8  -2   5   72.29    4.60
   8   2  -5   70.49    5.00
   8   2  -5   74.79    5.00
   8  -2   5   74.09    6.30
   8   2   5   77.99    5.00
   8   2   5   79.09    5.30
   8   2   5   75.19    4.50
   8   2   5   70.69    6.20
   8  -2  -5   73.09    4.80
   9  -2   5  248.58   13.30
   9   2  -5  252.87   12.60
   9  -2   5  212.78   13.20
   9   2  -5  260.27   12.70
   9  -2  -5  238.88   12.60
   9   2   5  256.27   12.90
   9   2   5  261.77   13.00
   9   2   5  273.67   13.60
   0   3  -5  272.97   20.30
   0  -3  -5  255.27   20.90
   0   3  -5  315.17   15.80
   0   3   5  242.58   14.30
   1   3  -5 1847.02   92.79
   1   3  -5 2087.29   99.59
  -1  -3  -5 1739.23   99.49
   1  -3  -5 1962.60  100.29
   1   3   5 1823.82   90.29
  -1   3  -5 1851.01   98.59
   1   3   5 1933.81   91.69
   2   3  -5  185.18   15.90
   2  -3   5  159.08    8.90
   2   3  -5  151.38   11.50
   2   3   5  139.99   15.30
   2   3   5  181.18   10.70
   2  -3  -5  161.28   15.60
   2   3   5  179.98    9.40
  -2   3  -5  169.88   10.40
   3   3  -5 2164.38  111.79
   3   3  -5 2298.87  117.89
   3  -3   5 2256.47  107.59
   3   3   5 2302.07  108.09
   3   3   5 2102.89  114.99
   3  -3  -5 2376.16  118.39
   4  -3   5  334.67   17.20
   4   3  -5  308.67   18.20
   4  -3   5  382.06   18.10
   4   3  -5  319.97   17.90
   4  -3   5  321.87   19.60
   4   3  -5  325.17   25.90
   4   3   5  320.57   20.10
   4   3   5  382.46   18.70
   4   3   5  320.27   18.00
   4   3   5  333.57   19.80
   4   3   5  365.46   18.50
   4  -3  -5  368.86   26.40
   4   3   5  330.77   19.10
   4   3   5  293.67   21.20
  -4   3  -5  331.17   19.50
   4   3   5  349.07   19.10
   5  -3   5  518.55   26.10
   5   3  -5  508.05   26.60
   5  -3   5  536.45   27.20
   5   3  -5  449.26   32.40
   5   3  -5  548.75   27.20
   5  -3   5  504.85   28.00
   5   3  -5  492.35   27.30
   5  -3   5  598.04   27.20
   5  -3   5  513.85   28.60
  -5   3   5  505.95   26.40
   5   3  -5  602.04   47.20
   5   3  -5  521.15   26.90
   5   3   5  506.15   27.40
   5  -3  -5  542.25   33.50
  -5   3  -5  536.75   29.00
   5   3   5  540.65   28.60
   5   3   5  532.25   27.20
   5  -3  -5  517.25   26.40
   5   3   5  534.55   28.40
   5   3   5  471.25   28.90
   5  -3  -5  552.84   27.50
   5   3   5  523.75   27.30
   5   3   5  519.55   25.90
  -5  -3   5  458.45   26.30
   6  -3   5  117.29    9.50
   6  -3   5  114.79    9.00
   6  -3   5  131.59    8.10
   6   3  -5  135.19    8.50
   6   3  -5  125.09    7.80
   6  -3   5  120.19    7.30
   6   3  -5  123.49    8.50
   6   3  -5  127.99    8.10
   6  -3   5  110.49    8.80
   6   3   5  124.09    8.50
   6   3   5  136.09    7.40
   6  -3  -5  132.19    8.40
  -6   3  -5  123.79    9.80
   6   3   5  129.89    9.50
   6   3   5  122.79    8.20
   6   3   5  125.99    9.60
   6  -3  -5  127.69    7.70
   6   3   5  120.79   10.20
   7   3  -5   51.69    4.00
   7  -3   5   43.20    4.70
   7  -3   5   44.00    3.40
   7   3  -5   42.40    4.00
   7   3  -5   39.30    3.50
   7  -3   5   47.20    5.20
   7   3   5   48.90    4.40
   7   3   5   40.80    3.80
   7   3   5   55.09    5.40
   7  -3  -5   54.39    3.70
   7   3   5   43.80    3.20
   8   3  -5  237.88   12.60
   8   3  -5  232.88   13.10
   8  -3   5  224.88   15.10
   8  -3   5  255.57   14.10
   8   3   5  231.18   14.30
   8   3   5  246.48   13.00
   8  -3  -5  239.68   12.50
   8   3   5  238.98   13.20
   9   3  -5   66.69    3.70
   9   3  -5   65.19    3.70
   9  -3   5   61.39    4.10
   9   3   5   61.49    3.90
   9   3   5   71.89    3.70
   9  -3  -5   70.09    4.00
   0   4  -5  149.29    9.50
   0  -4  -5  143.79   15.40
   0   4  -5  125.59   13.70
   0   4   5  112.69    7.90
   1   4  -5  208.08   20.80
   1   4  -5  204.48   13.40
   1  -4   5  192.78   10.60
  -1   4   5  191.28   11.30
  -1  -4  -5  226.28   20.90
   1   4   5  192.38   11.90
   1  -4  -5  196.28   18.90
  -1   4  -5  208.78   19.10
  -1   4  -5  212.38   12.90
   2  -4   5  476.95   23.40
   2   4  -5  435.76   26.90
  -2   4  -5  412.16   28.80
   2  -4  -5  495.25   34.10
   2   4   5  513.05   25.70
   3   4  -5  179.98   14.80
   3  -4   5  194.48   12.40
   3  -4   5  202.38   11.40
   3  -4   5  204.98   12.40
   3   4  -5  224.38   20.50
   3   4   5  203.18   11.70
   3   4   5  191.98   12.50
   3  -4  -5  228.28   20.60
   3   4   5  236.08   14.00
  -3   4  -5  220.58   13.60
   4   4  -5  386.16   31.10
   4  -4   5  410.66   22.90
   4   4  -5  412.86   21.80
   4  -4   5  414.36   23.20
   4  -4   5  426.96   21.00
   4   4  -5  380.76   22.30
   4   4  -5  394.16   21.60
   4   4  -5  458.25   22.90
   4  -4   5  421.36   21.80
   4   4   5  476.15   25.10
   4   4   5  407.76   23.10
   4  -4  -5  393.86   21.50
   4   4   5  417.46   22.30
   4   4   5  395.76   27.20
  -4   4  -5  401.26   23.70
   4  -4  -5  448.26   32.10
   4   4   5  416.76   22.20
   4  -4  -5  422.46   23.00
   4   4   5  460.55   23.30
   5  -4   5  159.48   10.70
   5  -4   5  151.58    8.60
   5   4  -5  164.58    9.60
   5   4  -5  156.58    9.20
   5  -4   5  135.19   10.60
   5  -4   5  157.88    9.70
   5   4  -5  137.29   15.10
   5   4  -5  144.99    9.90
   5  -4  -5  161.48   10.10
  -5  -4   5  164.38    8.90
   5  -4  -5  146.69   15.40
   5   4   5  160.48   10.00
  -5   4  -5  138.69   13.50
   5   4   5  154.68   11.70
   5   4   5  151.18    9.70
   5   4   5  165.68   11.00
   6  -4   5  223.88   13.90
   6   4  -5  190.68   11.90
   6   4  -5  207.78   11.40
   6   4  -5  187.38   11.00
   6  -4   5  187.48   13.00
   6  -4  -5  209.98   12.00
   6  -4  -5  186.18   10.60
   6   4   5  193.18   12.00
   6   4   5  190.98   12.90
   6   4   5  194.58   11.70
  -6   4  -5  192.98   13.70
  -6  -4   5  171.28   10.50
   6   4   5  205.18   14.50
   7   4  -5  359.36   20.30
   7   4  -5  371.36   19.60
   7   4  -5  397.46   19.80
   7  -4   5  406.16   21.90
   7  -4   5  378.66   21.90
  -7   4  -5  366.36   22.50
   7   4   5  434.96   21.50
   7   4   5  379.96   20.10
   7   4   5  345.67   21.30
   7  -4  -5  367.36   19.20
   8  -4   5   13.70    1.90
   8   4  -5   12.80    2.40
   8   4  -5   13.30    1.60
   8  -4   5   11.50    1.80
   8   4   5   10.60    1.40
   8   4   5   10.50    1.80
   8  -4  -5   11.30    1.20
   8   4   5   12.10    1.70
   0   5  -5    1.70    2.40
   0  -5  -5    5.60    4.20
   0   5  -5    2.50    1.40
   0   5   5    3.30    1.40
   0   5   5    2.50    1.10
  -1  -5  -5 3462.35  194.88
   1   5  -5 3981.70  193.28
  -1   5  -5 3679.23  193.38
  -1   5  -5 4029.70  181.98
   1   5   5 3816.02  180.28
   1  -5  -5 3846.22  194.48
  -1  -5   5 3428.76  178.18
  -2   5   5  231.48   13.10
  -2  -5  -5  225.38   12.60
   2   5  -5  219.38   16.40
   2   5  -5  277.17   23.90
   2  -5   5  236.68   12.60
  -2   5  -5  235.48   15.20
   2   5   5  238.58   14.70
  -2  -5   5  237.88   12.60
   2  -5  -5  230.78   12.30
   2   5   5  219.18   13.80
   2  -5  -5  245.58   23.50
   3   5  -5  476.25   35.40
   3  -5   5  442.26   24.20
   3  -5   5  445.56   23.00
   3   5  -5  416.86   27.80
   3   5  -5  455.15   23.20
   3   5   5  415.26   25.20
   3   5   5  452.45   23.50
   3   5   5  449.06   23.70
  -3  -5   5  462.55   22.90
   3  -5  -5  425.66   22.20
   3  -5  -5  475.55   35.70
  -3   5  -5  460.65   25.90
   3   5   5  459.35   24.60
   4  -5   5  196.18   14.00
   4   5  -5  200.18   11.50
   4  -5   5  212.28   11.90
  -4  -5  -5  208.08   11.40
   4   5  -5  195.38   12.50
   4  -5   5  208.78   13.20
   4   5  -5  202.38   11.60
   4   5   5  199.58   14.40
  -4   5  -5  176.28   13.70
   4   5   5  198.28   13.40
   4  -5  -5  209.78   21.70
  -4  -5   5  218.68   11.50
   4  -5  -5  226.18   12.90
   4   5   5  208.88   13.20
   4   5   5  203.48   12.20
   5   5  -5  200.28   11.20
   5  -5   5  198.58   12.80
   5  -5   5  191.58   13.00
   5   5  -5  195.68   11.20
   5   5  -5  188.68   19.10
   5   5  -5  176.48   12.00
   5  -5  -5  192.98   18.90
   5   5   5  214.18   13.00
   5   5   5  187.48   12.70
   5  -5  -5  213.18   12.50
  -5   5  -5  203.08   14.10
  -5  -5   5  193.48   10.90
   5   5   5  203.08   12.00
   5   5   5  190.38   14.10
   6   5  -5  120.29    7.00
   6   5  -5  105.89    7.70
   6  -5   5  107.09    8.60
   6   5  -5  106.69    6.80
   6  -5   5  109.59    8.50
   6   5   5  123.79    8.40
  -6  -5   5  104.79    6.60
   6   5   5  110.39    8.40
   6   5   5  112.19    7.60
  -6   5  -5  112.19    9.60
   6  -5  -5  105.99    6.20
   6  -5  -5  121.99    7.80
   7  -5   5  129.59    8.90
   7   5  -5  116.99    8.10
   7  -5   5  131.79    9.00
   7   5  -5  133.89    7.30
   7   5  -5  136.89    7.50
   7   5   5  139.59    8.10
   7  -5  -5  128.89    8.00
   7   5   5  118.99    8.60
   7   5   5  150.38    9.20
   8  -5   5   83.19    5.30
   8  -5   5   85.59    5.90
   8   5  -5   86.29    5.20
   8   5   5   91.99    5.20
   8   5   5   85.49    5.40
   8   5   5   89.89    5.70
   0   6  -5  776.42   46.30
   0  -6  -5  896.81   61.19
   0  -6   5  871.51   42.90
   0   6  -5  956.10   60.89
   0   6   5  991.80   44.90
   0   6   5  838.82   44.60
   0  -6  -5  819.02   42.90
  -1  -6  -5   81.69    5.70
   1  -6   5   91.79    5.60
   1  -6   5   87.59    5.80
   1   6  -5  103.79   14.90
  -1   6   5   93.69    7.40
   1   6  -5   89.19    8.90
   1  -6  -5  104.29   15.90
   1   6   5   89.39    7.40
  -1   6  -5   85.59    8.10
  -1  -6   5   91.29    5.80
   1  -6  -5   89.59    5.60
   2  -6   5  211.38   12.00
   2   6  -5  243.28   24.40
  -2  -6  -5  215.48   11.90
  -2   6   5  226.88   13.10
   2   6  -5  214.28   16.50
   2  -6   5  205.28   11.30
  -2   6   5  217.78   14.30
   2   6   5  208.38   13.00
   2  -6  -5  227.78   24.30
  -2  -6   5  216.98   11.90
   2  -6  -5  210.98   11.60
  -2   6  -5  229.88   15.70
   2   6   5  189.28   17.30
   3  -6   5 1400.86   65.89
   3  -6   5 1329.07   67.49
   3   6  -5 1339.47   72.19
  -3  -6  -5 1442.86   65.69
  -3   6  -5 1165.48   72.49
   3  -6  -5 1513.45  102.79
   3   6   5 1340.37   66.69
   3  -6  -5 1330.57   64.79
   3   6   5 1363.46   67.39
   3   6   5 1306.47   66.39
   4  -6   5   73.19    6.40
   4  -6   5   70.09    5.90
   4   6  -5   71.79   17.60
   4   6  -5   66.99    5.90
  -4  -6  -5   69.29    4.90
   4  -6   5   69.29    6.20
   4   6  -5   74.79    5.10
   4   6   5   66.29   12.30
   4   6   5   70.59    6.20
  -4   6  -5   73.09    7.40
   4  -6  -5   77.09   13.20
   4   6   5   71.69    5.80
   4   6   5   72.69    7.40
   4  -6  -5   81.69    6.30
   4   6   5   73.89    5.90
  -4  -6   5   69.99    5.00
   5  -6   5   32.30    3.90
  -5  -6  -5   30.50    2.80
   5  -6   5   32.90    4.00
   5   6  -5   34.80    3.10
   5   6  -5   36.50    9.90
   5   6  -5   31.70    3.60
  -5   6  -5   29.80    4.60
   5   6   5   25.70    3.60
  -5  -6   5   29.90    3.50
   5   6   5   39.60    4.00
   5  -6  -5   33.00    8.70
   5  -6  -5   33.10    4.90
   5   6   5   30.90    3.50
   6   6  -5    7.50    1.90
   6  -6   5    6.70    1.90
   6   6  -5    8.00    1.90
   6  -6   5    7.00    1.90
  -6   6   5    4.30    2.50
  -6   6  -5    7.50    2.70
  -6  -6   5    6.70    1.30
   6   6   5    3.60    1.40
   6   6   5    3.80    1.50
   6  -6  -5    6.10    1.60
   6   6   5    7.20    1.70
   7   6  -5   35.30    3.00
   7  -6   5   33.00    3.60
   7  -6   5   34.60    3.40
   7   6   5   34.40    2.90
   7   6   5   32.10    3.10
   7   6   5   32.40    3.00
   0   7  -5  178.38   18.20
   0   7   5  196.58   12.90
   0  -7  -5  195.58   11.00
   0  -7   5  205.58   11.10
   0   7  -5  220.28   25.60
   1  -7   5  116.89    6.80
  -1   7   5  119.09    9.00
  -1  -7  -5  118.79    7.00
   1   7  -5  137.09   20.10
  -1   7   5   97.79   10.00
   1   7  -5  101.79   10.60
   1  -7   5  108.19    7.10
   1  -7  -5  108.79    6.80
   1  -7  -5  126.49   19.40
   1   7   5  108.29    7.90
  -1   7  -5  109.99   10.00
  -1  -7   5  108.79    6.90
   1   7   5  113.79    9.00
   2  -7   5   10.30    1.60
   2   7  -5   14.70    4.60
   2   7  -5   11.70    7.40
  -2  -7  -5   13.30    1.80
   2  -7   5   12.70    2.10
   2   7   5   15.30    3.60
  -2  -7   5   14.10    1.90
   2  -7  -5   10.40    8.00
   2   7   5   10.70    2.40
  -2   7  -5   15.30    3.40
   3  -7   5   92.79    7.40
   3   7  -5   85.39    7.00
   3  -7   5   96.59    7.40
  -3   7   5   95.49    8.50
   3  -7   5   90.19    6.80
  -3  -7  -5   93.19    6.20
   3   7  -5   79.99   10.30
   3   7  -5  112.79   17.40
   3   7   5   96.59    7.10
   3   7   5   91.19    7.00
   3   7   5   95.79    7.20
   3  -7  -5  105.99   17.00
  -3  -7   5   94.29    6.20
  -3   7  -5  106.89   10.30
   3   7   5  104.39    8.80
   4   7  -5  103.39   17.10
   4  -7   5   99.39    8.40
   4   7  -5   90.69    7.20
   4  -7   5   93.79    7.70
  -4  -7  -5   91.99    7.60
  -4   7   5   96.99    8.90
   4   7   5  104.69    8.00
   4   7   5   97.19    7.20
  -4  -7   5   99.49    6.70
   4  -7  -5  104.89    9.30
   4  -7  -5   93.09   15.30
   4   7   5   96.29    8.50
  -4   7  -5   99.39    9.10
   4   7   5  116.29   15.90
  -5  -7  -5   83.29    5.00
   5   7  -5   67.69    5.70
   5  -7   5   75.79    6.30
  -5   7   5   74.09    7.50
   5   7   5   68.09    5.70
   5  -7  -5   81.59    6.00
   5   7   5   74.79    5.60
   5   7   5   71.99    5.90
  -5   7  -5   80.19    7.70
  -5  -7   5   73.29    4.90
   6   7  -5    7.00    2.00
   6  -7   5    6.80    1.60
   6  -7   5    7.60    1.80
  -6  -7   5    7.40    1.10
   6  -7  -5    7.60    1.50
   6   7   5    8.00    1.70
   6   7   5    6.60    1.20
   6   7   5    8.70    1.60
   7  -7   5    0.60    0.50
   7   7   5    0.60    0.50
   7   7   5    2.30    0.80
   0  -8  -5  742.63   38.00
   0  -8   5  810.72   41.60
   0  -8   5  757.42   38.00
   1   8  -5   14.00    4.30
  -1  -8  -5   18.40    2.10
   1  -8   5   13.80    2.60
   1  -8   5   18.10    1.90
   1   8  -5    5.60   10.60
   1  -8  -5    8.90   12.80
  -1   8  -5   17.20    4.30
  -1  -8   5   16.80    2.00
   1  -8  -5   17.50    1.90
   2   8  -5   22.40    6.00
   2  -8   5   31.80    3.50
  -2   8   5   29.90    6.20
  -2  -8  -5   28.70    2.70
  -2  -8   5   26.70    2.70
   2  -8  -5   25.80    2.30
   2   8   5   24.60    3.10
   2  -8  -5   40.30   13.40
   2   8   5   30.80    3.30
  -2   8  -5   30.00    5.00
  -3   8   5  574.94   31.30
  -3  -8  -5  557.24   28.10
   3   8  -5  498.05   44.50
   3  -8   5  564.14   29.70
   3   8   5  539.95   28.80
  -3   8  -5  579.44   32.50
   3   8   5  602.74   29.40
  -3  -8   5  552.94   28.20
   3   8   5  547.45   29.10
   4  -8   5   36.40    3.80
   4   8  -5   35.80    3.70
   4  -8   5   34.80    3.80
  -4  -8  -5   43.30    3.10
   4  -8  -5   37.40    3.80
  -4   8  -5   38.00    5.30
   4   8   5   32.70    3.40
  -4  -8   5   37.60    3.10
   4   8   5   33.80    3.60
   4   8   5   40.10    3.70
   5  -8   5  168.78   10.20
   5   8  -5  185.18   11.60
  -5  -8  -5  169.48    9.30
  -5  -8   5  167.48    9.30
   5   8   5  165.28   10.20
   5   8   5  176.28    9.90
   6   8  -5   99.29    6.20
   6   8   5  102.89    6.30
  -6  -8   5  101.79    5.60
   6   8   5  112.29    6.00
   0  -9   5    1.60    0.70
   0  -9  -5    1.50    0.70
   0   9  -5    2.90    3.60
   1   9  -5   77.59   10.00
  -1  -9  -5   93.79    5.90
   1  -9   5   91.39    5.30
  -1   9  -5   92.59    9.70
   1  -9  -5   93.49    5.60
  -1  -9   5  100.69    5.90
   2  -9   5   93.09    6.70
  -2  -9  -5   89.09    5.80
   2  -9   5   91.59    6.70
   2   9   5   97.19    6.50
  -2  -9   5   93.09    5.80
   2  -9  -5   88.29    5.60
  -2   9  -5   89.89    9.20
   2   9   5  103.49    6.60
   3  -9   5   12.50    2.00
   3   9  -5   11.10    1.90
  -3  -9  -5   10.40    1.40
   3  -9   5    9.80    1.80
  -3  -9   5   12.30    1.50
   3   9   5   15.00    2.10
  -3   9  -5   19.10    6.00
   3   9   5   12.20    1.80
   3  -9  -5   13.40    2.10
  -4  -9  -5  100.49    5.80
   4  -9   5   96.39    6.90
   4   9  -5   97.19    6.50
   4  -9   5  104.29    6.70
   4  -9  -5  101.59    6.50
  -4  -9   5  101.39    5.80
   4   9   5   90.19    6.20
   4   9   5  101.99    6.20
   5   9  -5   47.50    3.40
  -5  -9  -5   46.50    3.00
   5  -9   5   43.30    3.50
  -5  -9   5   54.79    3.30
   5   9   5   51.59    3.20
   5   9   5   48.10    3.30
   5  -9  -5   47.30    3.40
   0  10   5   19.50    2.10
   0 -10  -5   23.40    1.90
   0 -10   5   23.80    1.70
   0 -10   5   23.10    2.30
   1 -10   5   28.30    2.70
  -1 -10  -5   26.40    2.20
   1 -10   5   28.30    2.70
  -1 -10   5   27.60    2.10
   1  10   5   27.80    2.50
   1 -10  -5   29.90    2.30
   1  10   5   23.50    2.30
   2 -10   5  120.09    8.30
   2  10  -5  135.69    8.00
   2 -10   5  129.39    7.90
  -2 -10   5  137.19    7.20
   2  10   5  139.39    7.70
   2  10   5  126.59    7.60
   2 -10  -5  132.39    8.00
   3  10  -5  176.38   10.50
   3 -10   5  173.88    9.90
  -3 -10  -5  194.88    9.80
   3 -10   5  161.08    9.50
   3  10   5  170.98    9.60
   3 -10  -5  184.68   10.00
   3  10   5  179.18    9.50
  -3 -10   5  187.68    9.60
   0   0  -6 1416.96   67.89
   0   0  -6 1369.56   73.39
   0   0   6 1391.66   66.19
  -1   0   6  801.22   37.50
  -1   0  -6  845.32   38.80
  -1   0  -6  666.53   43.80
   1   0   6  844.62   38.40
   1   0  -6  772.32   44.90
   2   0   6 6066.49  273.67
   2   0   6 5045.50  268.77
  -2   0  -6 5925.21  268.97
   3   0   6 1055.49   53.79
   3   0  -6  998.90   61.09
  -3   0  -6 1213.58   53.69
   3   0   6 1160.48   54.49
   4   0   6 1247.98   56.29
  -4   0  -6 1160.58   54.89
   4   0  -6 1078.19   62.89
   4   0   6 1024.50   55.19
   5   0   6   58.69    4.40
   5   0   6   60.89    5.20
   5   0  -6   53.09    8.40
   5   0   6   59.39    5.00
   5   0   6   58.99    4.90
   5   0   6   55.79    4.30
   5   0   6   58.59    5.40
   5   0  -6   51.89    4.30
   5   0   6   57.49    4.00
   5   0  -6   58.59    7.70
   5   0  -6   59.49    4.30
   5   0   6   66.79    5.50
   6   0   6  164.28    9.40
   6   0   6  147.69   10.20
   6   0   6  152.48   10.50
   6   0   6  157.88   11.10
   6   0   6  147.59   11.60
   6   0   6  160.08   10.30
   6   0  -6  140.99    9.10
   6   0   6  156.68    9.10
   6   0  -6  158.28    9.10
   6   0   6  152.18    8.80
   6   0  -6  142.49    9.30
   7   0   6  359.86   20.10
   7   0   6  389.26   20.40
   7   0   6  333.27   18.50
   7   0  -6  349.27   18.40
   7   0   6  350.76   21.30
   7   0  -6  330.07   18.70
   7   0   6  344.67   18.30
   7   0   6  347.47   18.20
   8   0   6  116.09    6.50
   8   0   6  107.99    6.70
   8   0  -6  103.59    6.70
   8   0   6   95.09    8.20
   8   0  -6  112.39    6.50
   8   0   6  109.69    7.50
   8   0   6  111.89    6.40
   8   0   6  110.29    7.80
   0   1  -6 3123.79  136.79
   0  -1  -6 2592.14  142.19
   0   1   6 2838.42  134.69
   0   1  -6 2819.32  142.29
   1  -1   6 2290.27  110.89
   1   1  -6 2260.57  113.99
  -1  -1  -6 2128.89  118.39
  -1   1   6 2503.95  110.39
   1   1  -6 2485.25  119.19
  -1   1  -6 2420.16  118.79
   1   1   6 2163.48  111.69
   1   1   6 2482.35  110.99
   1  -1  -6 2278.97  118.89
   2  -1   6 1146.39   51.29
   2   1  -6  960.60   58.19
   2  -1   6 1226.28   51.59
   2   1  -6 1018.80   53.89
   2   1   6 1030.90   56.09
   2  -1  -6  926.41   58.09
   2   1   6 1034.90   51.19
  -2   1  -6 1157.28   51.79
   2   1   6 1027.10   51.89
   3   1  -6 2427.56  129.99
   3  -1   6 2446.56  121.39
   3  -1  -6 2547.95  130.49
  -3   1  -6 2748.93  122.09
   4   1  -6  567.24   39.40
   4  -1   6  649.34   32.50
   4   1  -6  625.84   40.90
   4  -1   6  711.23   32.70
   4   1   6  602.44   32.70
   4   1   6  680.23   33.80
  -4   1  -6  647.54   32.80
   4  -1  -6  667.13   40.40
   5  -1   6  416.56   23.90
   5  -1   6  454.95   23.20
   5  -1   6  438.76   21.80
   5  -1   6  465.35   22.70
   5  -1   6  435.46   22.70
   5   1  -6  391.76   22.10
   5  -1   6  418.26   21.60
   5  -1   6  419.26   23.10
   5   1  -6  415.36   28.00
   5   1  -6  375.06   26.90
   5  -1   6  430.86   21.50
   5   1  -6  384.66   22.00
   5   1  -6  448.56   21.90
   5   1   6  412.66   22.70
   5   1   6  430.76   22.30
   5  -1  -6  414.26   27.30
   5   1   6  437.26   23.80
   5  -1  -6  448.56   21.90
   5   1   6  442.56   23.70
   5   1   6  434.96   22.90
   5  -1  -6  410.06   22.00
   5   1   6  424.06   23.80
   5   1   6  436.86   21.50
   5  -1  -6  393.36   21.60
  -5   1  -6  424.66   22.80
   5   1   6  409.46   22.00
   6  -1   6  972.20   47.40
   6   1  -6  905.41   47.90
   6  -1   6  966.40   48.90
   6  -1   6 1005.10   47.70
   6  -1   6  986.90   49.10
   6  -1   6  990.00   50.39
   6   1  -6  898.11   47.90
   6  -1   6 1010.60   47.40
   6   1  -6  968.60   47.60
   6  -1   6  943.61   49.10
   6   1   6  969.90   47.90
   6   1   6  934.71   49.60
   6   1   6  974.40   48.10
   6   1   6  999.20   50.39
   6  -1  -6  946.11   47.40
   6   1   6  981.80   47.30
   6   1   6  998.80   48.90
   6   1   6  951.80   49.00
   6  -1  -6  934.71   47.90
   6   1   6  988.90   50.09
   7   1  -6  252.97   14.80
   7  -1   6  262.07   13.90
   7  -1   6  268.47   15.80
   7  -1   6  271.47   14.00
   7  -1   6  256.57   15.50
   7   1  -6  249.28   14.50
   7  -1   6  251.27   14.20
   7   1  -6  249.18   14.20
   7  -1  -6  241.18   14.40
   7  -1  -6  258.47   14.40
   7   1   6  267.87   15.50
   7   1   6  258.57   15.80
   7   1   6  276.57   13.90
   7   1   6  255.57   14.40
   7   1   6  271.77   16.70
   7   1   6  261.77   14.50
   8   1  -6   41.40    3.10
   8  -1   6   33.10    3.70
   8  -1   6   41.70    3.60
   8  -1   6   43.40    4.60
   8   1  -6   34.90    3.20
   8   1   6   33.20    3.10
   8  -1  -6   39.60    3.20
   8   1   6   40.30    4.00
   8   1   6   41.60    4.10
   8   1   6   45.60    3.20
   8   1   6   42.70    4.60
   8   1   6   40.70    2.90
   9  -1   6  128.49    7.80
   9  -1   6  115.29    7.30
   9   1  -6  128.49    6.90
   9  -1  -6  131.59    6.80
   0   2  -6 1133.79   61.09
   0   2   6 1151.78   53.19
   0  -2  -6 1047.00   61.59
   1  -2   6  117.19    6.40
   1   2  -6  114.39   11.60
   1   2  -6  107.49    8.40
   1  -2   6  118.69    5.90
   1  -2  -6   99.29   11.40
  -1   2  -6  127.69    7.40
   1   2   6  113.59    7.70
   1   2   6  109.19    6.40
  -1   2  -6  103.39   11.10
   2  -2   6 1689.93   80.69
   2   2  -6 1627.24   84.09
   2   2  -6 1754.52   90.29
   2   2   6 1667.73   81.99
   2   2   6 1585.44   87.79
   2   2   6 1800.72   80.99
   2  -2  -6 1666.53   89.89
   3   2  -6 2095.69  118.09
   3  -2   6 2461.95  108.19
   3  -2   6 2204.88  108.99
   3   2  -6 2301.27  121.59
  -3   2  -6 2306.67  109.99
   3  -2  -6 2365.46  119.19
   3   2   6 2054.79  110.29
   3   2   6 2352.66  109.39
   3   2   6 2351.56  114.09
   4  -2   6  301.67   16.20
   4  -2   6  287.37   16.80
   4   2  -6  287.77   16.30
   4   2  -6  269.17   23.20
   4  -2   6  299.87   15.50
   4  -2   6  293.07   17.40
   4   2   6  329.47   16.50
   4   2   6  312.97   16.70
   4  -2  -6  328.27   24.10
  -4   2  -6  310.27   17.20
   4   2   6  313.87   17.40
   4   2   6  309.97   16.50
   4   2   6  275.87   17.60
   5   2  -6  346.67   18.10
   5  -2   6  359.26   19.00
   5  -2   6  322.67   19.30
   5   2  -6  308.47   18.50
   5  -2   6  347.37   17.80
   5  -2   6  371.26   17.90
  -5   2   6  321.87   17.90
   5   2  -6  293.07   23.80
   5  -2   6  344.47   20.20
   5  -2   6  360.46   19.10
   5  -2   6  375.46   18.10
   5   2  -6  329.37   18.60
   5   2   6  341.77   19.20
   5   2   6  369.56   18.90
   5   2   6  364.86   20.30
   5   2   6  352.36   17.70
   5   2   6  326.97   18.90
   5   2   6  350.86   18.60
   5  -2  -6  348.27   17.80
   5  -2  -6  340.77   18.20
   5  -2  -6  350.06   24.50
   5   2   6  374.96   20.30
   6  -2   6  970.50   48.30
   6   2  -6  851.21   47.30
   6  -2   6  936.81   49.60
   6  -2   6 1011.00   47.90
   6   2  -6  955.60   46.90
   6  -2   6  945.11   46.50
   6  -2   6  976.10   46.80
   6  -2   6  925.81   48.50
   6  -2   6  978.30   46.60
   6   2  -6  904.61   47.30
   6   2   6  997.50   49.50
   6  -2  -6  964.90   46.60
   6   2   6  973.10   47.60
   6   2   6  928.11   47.30
   6   2   6  948.91   49.99
   6   2   6  958.20   49.50
  -6   2  -6 1010.20   49.20
   6  -2  -6  883.11   46.90
   6   2   6  960.40   46.40
   7   2  -6  164.48   10.20
   7  -2   6  162.48   11.50
   7  -2   6  174.58   12.30
   7  -2   6  173.48   10.50
   7   2  -6  156.18   10.40
   7  -2   6  178.08   10.10
   7   2  -6  169.78    9.90
   7   2   6  180.18   10.20
   7   2   6  159.18   11.90
   7   2   6  175.68    9.50
   7  -2  -6  171.98   10.00
   7   2   6  180.98   11.50
   7   2   6  193.98   13.00
   7   2   6  168.08   10.40
   8  -2   6  284.47   17.00
   8   2  -6  304.87   15.20
   8   2  -6  280.17   15.20
   8  -2   6  291.77   16.30
   8   2   6  293.17   15.00
   8   2   6  301.07   16.70
   8   2   6  263.97   15.20
   8  -2  -6  285.47   15.00
   9  -2   6   13.70    1.70
   9   2  -6   14.20    1.50
   9  -2   6   15.30    1.80
   9  -2  -6   16.90    1.30
   9   2   6   16.50    1.70
   9   2   6   14.20    1.50
   0  -3  -6 3091.69  163.88
   0   3  -6 3355.36  162.98
   1   3  -6 3553.34  165.78
  -1  -3  -6 3000.80  165.88
  -1   3  -6 3462.25  156.88
   1   3   6 3056.29  155.08
   1  -3  -6 3214.58  166.08
  -1   3  -6 3294.27  165.08
   2   3  -6  803.12   45.90
   2  -3   6  657.63   35.40
   2   3  -6  720.93   39.60
   2  -3  -6  745.13   45.90
   2   3   6  758.32   37.30
   2   3   6  662.23   45.20
   3   3  -6   97.19    9.40
   3  -3   6  107.79    6.50
   3   3  -6  112.69   13.50
   3  -3  -6  118.09   13.60
   3   3   6  100.69    7.90
  -3   3  -6   95.69    7.50
   3   3   6  117.29   12.70
   3   3   6  105.99    6.90
   4  -3   6 1947.41   95.29
   4   3  -6 1882.91  105.59
   4  -3   6 1968.80   92.89
  -4   3   6 1881.21   93.39
   4  -3   6 1982.30   93.79
   4   3  -6 1758.92   93.89
   4   3   6 1900.01   93.79
   4   3   6 2057.69   95.09
   4   3   6 1873.71   94.09
   4   3   6 2033.60   93.99
   4   3   6 1974.80   96.29
   4   3   6 1986.60   94.49
   4   3   6 1990.30   95.39
   5   3  -6  225.98   13.80
   5  -3   6  235.98   15.20
   5  -3   6  264.97   13.70
   5  -3   6  226.78   14.50
   5  -3   6  250.37   14.10
   5   3  -6  255.07   13.80
   5   3  -6  236.98   13.60
  -5   3   6  240.18   13.20
   5   3  -6  204.18   19.70
   5   3  -6  252.47   13.30
   5  -3   6  240.78   12.80
   5   3   6  249.08   12.70
   5  -3  -6  261.07   14.00
   5  -3  -6  244.68   20.20
  -5   3  -6  253.17   15.50
   5   3   6  241.08   15.90
  -5  -3   6  216.18   12.80
   5   3   6  237.98   15.10
   5   3   6  231.48   13.60
   5   3   6  241.98   15.00
   5   3   6  249.48   14.30
   5  -3  -6  227.88   13.10
   5   3   6  249.38   14.00
   6   3  -6  611.54   33.30
   6  -3   6  728.43   33.20
   6  -3   6  641.94   32.20
   6   3  -6  651.63   32.60
   6   3  -6  643.24   33.10
   6  -3   6  638.74   35.20
   6  -3   6  652.23   34.00
   6   3   6  619.04   34.80
   6   3   6  667.33   32.00
   6   3   6  650.73   35.30
   6  -3  -6  614.34   32.50
   6   3   6  639.34   33.20
  -6   3  -6  680.23   35.60
   6   3   6  657.63   36.30
   6   3   6  652.93   33.60
   7   3  -6  112.59    7.60
   7  -3   6  107.59    8.30
   7   3  -6  115.29    7.40
   7  -3   6  122.09    9.30
   7  -3  -6  107.19    6.90
   7   3   6  127.39    9.30
   7   3   6  123.09    8.00
   7   3   6  118.49    7.50
   8  -3   6   45.20    4.20
   8   3  -6   39.70    3.20
   8   3  -6   41.00    3.20
   8  -3   6   43.10    4.20
   8   3   6   39.20    3.60
   8   3   6   44.20    4.40
   8   3   6   47.70    3.30
   8  -3  -6   42.00    2.90
   0  -4  -6  284.87   24.90
   0   4   6  265.47   15.60
   0   4  -6  302.87   23.90
   0   4  -6  290.97   17.20
  -1   4   6  329.77   18.20
   1  -4   6  330.17   17.40
   1   4  -6  331.97   20.70
  -1  -4  -6  304.27   27.80
   1   4  -6  382.86   27.70
   1   4   6  332.27   19.00
  -1   4  -6  341.97   27.00
  -1   4  -6  388.86   20.10
   2   4  -6 1106.89   61.09
   2   4  -6  903.91   52.29
   2  -4   6  919.11   48.20
   2   4   6 1019.30   50.59
  -2   4  -6  986.40   50.49
   2  -4  -6 1027.70   61.19
   3   4  -6  340.77   19.50
   3  -4   6  343.17   19.80
   3  -4   6  384.86   19.10
   3   4  -6  395.56   30.20
   3   4  -6  327.17   23.10
  -3  -4   6  361.96   18.70
   3  -4  -6  398.66   30.40
  -3   4  -6  375.46   21.00
   3   4   6  386.86   21.60
   3   4   6  363.06   20.40
   3   4   6  336.97   19.90
   4  -4   6   89.89    6.10
   4   4  -6   79.69    6.30
   4  -4   6   90.19    7.10
   4   4  -6   85.49   13.10
   4  -4   6   74.39    6.50
  -4   4   6   86.39    5.60
   4   4  -6   81.09    5.50
   4   4   6   83.09   10.30
   4  -4  -6   98.19   13.60
   4   4   6   91.39    7.20
   4   4   6   90.99    6.30
  -4   4  -6   78.99    7.40
   4   4   6   86.19    6.20
  -4  -4   6   84.79    5.60
   4  -4  -6   89.29    6.60
   4   4   6   89.39    8.00
   5   4  -6  274.17   25.00
   5  -4   6  335.07   18.00
   5  -4   6  343.57   19.50
   5   4  -6  321.37   17.50
   5  -4   6  314.97   18.60
   5   4  -6  319.87   18.00
   5   4   6  322.97   18.00
  -5  -4   6  320.47   17.10
   5  -4  -6  329.97   25.90
   5  -4  -6  292.47   21.90
   5   4   6  338.67   20.50
  -5   4  -6  309.97   19.60
   5   4   6  337.97   19.30
   5   4   6  322.37   17.70
   6   4  -6  520.55   26.70
   6  -4   6  540.45   28.80
   6   4  -6  499.45   27.20
   6   4  -6  530.85   26.20
   6   4   6  527.25   27.00
   6   4   6  536.15   29.00
  -6  -4   6  475.05   25.90
   6   4   6  537.25   27.70
   6  -4  -6  511.35   25.90
  -6   4  -6  538.65   29.50
   6   4   6  476.85   29.80
   7  -4   6   31.30    3.80
   7   4  -6   30.90    2.70
   7   4  -6   32.50    3.00
   7   4  -6   37.10    3.40
   7  -4   6   28.70    3.80
   7   4   6   39.80    4.30
   7   4   6   32.00    3.00
   7  -4  -6   29.70    2.40
   7   4   6   37.50    3.60
   8  -4   6   67.79    5.40
   8   4  -6   76.29    4.40
   8   4  -6   76.39    4.70
   8  -4   6   71.09    5.30
   8   4   6   70.49    4.80
   8   4   6   71.89    5.40
   8  -4  -6   73.69    4.10
   8   4   6   79.69    4.80
   0  -5  -6 2916.01  154.38
   0  -5   6 2757.12  136.59
   0   5   6 3127.29  137.99
   0  -5  -6 2666.83  136.59
  -1  -5  -6  339.97   18.00
   1   5  -6  368.96   29.60
   1  -5   6  341.87   17.90
  -1   5   6  345.67   19.00
   1   5  -6  357.86   21.90
   1   5   6  333.07   19.70
   1  -5  -6  350.16   30.40
  -1   5  -6  341.87   30.70
   1  -5  -6  333.17   17.80
  -1   5  -6  383.46   20.90
  -1  -5   6  340.87   17.90
  -2  -5  -6  498.35   24.90
   2   5  -6  551.14   38.60
   2  -5   6  466.85   24.80
  -2   5   6  430.66   25.90
   2   5  -6  476.65   29.70
   2  -5  -6  484.95   24.50
   2   5   6  503.65   27.30
   2   5   6  482.25   26.50
   2  -5  -6  530.45   39.10
  -2  -5   6  501.05   24.80
   3   5  -6  161.58   19.20
   3  -5   6  171.58   10.70
   3   5  -6  137.09    9.80
   3  -5   6  162.78    9.40
  -3  -5  -6  152.98    9.00
   3  -5   6  155.08   10.20
   3   5   6  129.99   13.40
  -3   5  -6  160.18   11.50
   3   5   6  157.38    9.70
   3   5   6  165.68   10.80
   3   5   6  162.48    9.90
  -3  -5   6  167.38    9.20
   3  -5  -6  188.88   20.30
   3  -5  -6  150.58    9.30
   4   5  -6  511.95   39.70
   4  -5   6  492.85   28.00
   4  -5   6  544.05   27.20
   4   5  -6  529.55   26.90
  -4  -5  -6  533.45   26.40
   4  -5   6  523.35   28.50
   4   5  -6  505.45   29.60
   4   5   6  529.75   27.60
   4   5   6  568.64   29.90
   4  -5  -6  551.94   40.70
   4   5   6  519.95   28.50
  -4   5  -6  466.95   30.20
   4   5   6  491.55   29.60
  -4  -5   6  492.55   27.30
   4  -5  -6  576.54   28.00
   5   5  -6  274.37   14.70
   5   5  -6  225.38   23.10
   5   5  -6  250.57   14.10
   5   5  -6  249.58   15.30
   5  -5   6  264.87   15.50
   5  -5   6  254.77   16.00
   5  -5   6  264.17   16.50
   5   5   6  273.37   15.70
   5  -5  -6  280.87   24.00
  -5   5  -6  265.47   17.40
   5  -5  -6  302.27   15.70
   5   5   6  272.57   18.10
   5   5   6  270.37   15.20
  -5  -5   6  266.27   14.20
   5   5   6  259.77   16.30
   6   5  -6  221.38   13.60
   6  -5   6  250.17   14.90
   6   5  -6  240.78   12.90
   6   5  -6  218.48   12.40
   6  -5   6  241.18   15.00
   6   5   6  234.48   13.40
   6  -5  -6  246.38   13.50
  -6   5  -6  226.68   15.60
  -6  -5   6  217.38   12.50
   6   5   6  227.98   14.60
   6   5   6  256.97   14.40
   7   5  -6  155.98    8.30
   7   5  -6  136.99    8.80
   7   5  -6  146.89    8.00
   7  -5   6  148.69    9.90
   7  -5   6  171.28   10.40
   7   5   6  163.98   10.10
   7   5   6  141.89    9.60
   7   5   6  141.49    9.10
   8  -5   6  214.38   11.60
   8  -5   6  188.78   11.30
   8   5  -6  212.38   10.90
   8   5   6  212.58   11.20
   8   5   6  237.78   10.90
   0   6  -6  854.41   57.79
   0  -6   6  794.92   39.50
   0   6  -6  785.32   44.00
   0  -6  -6  805.52   58.09
   0  -6  -6  803.02   39.60
   0   6   6  783.42   41.40
  -1  -6  -6  190.48   10.60
   1   6  -6  163.18   14.00
   1  -6   6  163.98   11.10
   1  -6   6  185.88   10.30
   1   6  -6  221.28   23.10
  -1   6   6  207.68   12.60
  -1   6   6  183.18   11.90
  -1  -6   6  201.98   10.70
   1  -6  -6  184.18   10.40
   1  -6  -6  183.48   23.00
  -1   6  -6  197.18   14.00
   1   6   6  186.98   12.50
   2  -6   6  135.69    8.10
   2   6  -6  110.79   11.70
   2   6  -6  146.69   18.90
  -2   6   6  132.49    9.10
  -2   6   6  128.49    9.90
   2  -6   6  118.89    7.20
  -2  -6  -6  136.69    8.00
   2  -6  -6  130.79    7.60
   2   6   6  139.29   10.20
   2  -6  -6  126.09   18.60
   2   6   6  123.89    9.10
  -2  -6   6  140.79    8.00
  -2   6  -6  155.08   11.90
   3   6  -6 1372.76   76.19
   3  -6   6 1470.45   76.69
   3  -6   6 1532.15   76.89
   3   6  -6 1480.25   85.19
  -3   6   6 1527.65   76.39
  -3  -6  -6 1594.94   75.29
   3  -6   6 1514.55   75.79
   3   6  -6 1645.24   94.09
  -3   6  -6 1404.46   78.69
   3   6   6 1560.84   77.19
  -3  -6   6 1642.24   75.29
   3  -6  -6 1673.33   96.09
   3   6   6 1767.22   77.79
   3   6   6 1529.05   78.59
   3  -6  -6 1551.44   74.49
   3   6   6 1617.24   76.29
   4   6  -6  566.54   44.50
   4  -6   6  591.24   31.50
  -4  -6  -6  604.24   29.60
   4  -6   6  550.04   31.50
   4  -6   6  588.04   30.40
   4   6  -6  542.75   30.80
   4   6   6  584.84   31.70
   4  -6  -6  627.94   45.10
  -4  -6   6  574.34   29.70
   4   6   6  646.24   31.90
  -4   6  -6  576.44   33.30
   4   6   6  569.24   33.20
   4   6   6  583.24   30.60
   4  -6  -6  640.94   31.30
   5  -6   6  132.09    9.90
   5   6  -6  132.89    9.90
  -5  -6  -6  131.39    7.70
   5  -6   6  133.39   10.60
   5   6   6  133.19    9.50
  -5   6  -6  144.29   12.20
  -5  -6   6  118.49    7.70
   5   6   6  146.59   12.80
   5  -6  -6  134.79    8.90
   5   6   6  132.69    8.70
   6  -6   6   48.50    4.80
   6  -6   6   54.09    4.90
  -6   6   6   46.80    6.10
   6   6  -6   49.90    4.20
  -6  -6   6   49.70    3.50
   6   6   6   46.40    4.40
   6  -6  -6   51.19    4.00
   6   6   6   44.40    4.40
  -6   6  -6   49.00    6.10
   6   6   6   53.89    4.20
   7  -6   6  178.88   11.40
   7  -6   6  203.68   11.30
   7   6  -6  184.68   10.50
   7   6   6  206.58   11.00
   7   6   6  184.58   10.90
   0   7  -6   75.49    8.60
   0   7   6   85.49    7.80
   0  -7   6   81.49    5.40
   0  -7  -6   81.89    5.40
   1   7  -6  103.29   10.90
  -1  -7  -6  112.89    7.10
   1  -7   6  117.79    7.40
   1  -7   6  117.19    6.90
  -1   7   6  107.09    9.00
  -1   7   6  128.09    9.30
   1   7   6  107.19    8.00
   1  -7  -6  108.69    6.90
   1  -7  -6  125.79   20.80
  -1   7  -6  112.49   10.40
   1   7   6  123.19    9.40
  -1  -7   6  124.39    7.30
  -2   7   6  991.50   48.70
   2  -7   6  972.30   46.10
  -2  -7  -6  945.51   45.70
   2  -7   6  898.11   44.70
   2  -7   6  975.00   47.20
   2   7  -6  997.70   66.99
   2   7  -6  880.81   52.19
   2  -7  -6  773.22   68.09
   2   7   6  928.11   48.80
   2   7   6  898.61   47.00
   2  -7  -6  932.81   45.20
  -2  -7   6  916.31   45.70
  -2   7  -6  913.01   49.90
   3   7  -6   59.19   14.10
   3   7  -6   72.09    6.10
   3  -7   6   81.49    6.50
   3  -7   6   61.99    7.40
   3  -7   6   72.49    6.30
  -3  -7  -6   85.29    5.40
   3   7  -6   69.29   14.20
  -3   7   6   61.09   11.50
  -3   7  -6   76.39   10.70
   3   7   6   83.89    6.10
  -3  -7   6   77.69    5.30
   3   7   6   83.39   10.00
   3   7   6   77.29    6.20
   3   7   6   84.09    6.30
   3  -7  -6   55.99   15.50
   4  -7   6  408.26   22.80
   4   7  -6  378.76   22.30
  -4  -7  -6  424.66   21.30
  -4   7   6  397.86   24.40
   4  -7   6  402.46   23.00
   4   7   6  402.66   22.60
  -4  -7   6  418.16   21.30
   4  -7  -6  443.46   22.70
   4   7   6  425.46   22.20
  -4   7  -6  408.56   25.00
   4   7   6  423.76   23.10
   5  -7   6  158.48   10.20
  -5  -7  -6  157.08    8.50
   5  -7   6  126.39    9.60
   5   7  -6  143.69    9.30
  -5   7   6  137.09   11.20
   5  -7  -6  163.88    9.50
   5   7   6  154.58    9.10
  -5   7  -6  145.99   11.50
  -5  -7   6  146.09    8.50
   5   7   6  142.79    9.60
   5   7   6  150.88    9.80
   6   7  -6   30.80    2.90
   6  -7   6   36.50    3.80
   6  -7   6   32.60    3.30
   6  -7  -6   32.90    2.80
   6   7   6   35.40    3.90
   6   7   6   32.80    3.00
   6   7   6   36.60    2.90
  -6  -7   6   33.70    2.50
   7   7  -6  145.09    7.30
   7  -7   6  129.59    8.10
   7   7   6  126.89    7.50
   0   8  -6  190.98   15.80
   0  -8   6  195.88   10.80
   0  -8  -6  201.38   11.00
   0   8   6  178.38   12.10
   0  -8   6  209.28   11.60
   1   8  -6  481.45   31.60
  -1  -8  -6  479.65   25.60
   1   8  -6  549.54   48.60
   1  -8   6  567.34   26.70
   1  -8   6  494.15   25.10
   1  -8  -6  508.75   25.40
  -1   8  -6  483.15   30.50
   1   8   6  485.35   27.00
  -2   8   6  341.57   20.00
   2   8  -6  305.47   23.20
  -2  -8  -6  367.26   19.10
   2   8   6  314.67   18.00
   2  -8  -6  331.27   16.80
   2   8   6  337.27   18.30
   2   8   6  336.67   19.40
  -2  -8   6  299.47   18.10
  -3   8   6    0.60    2.50
   3  -8   6    2.20    1.00
   3  -8   6    2.60    1.10
   3   8  -6    4.50    1.70
  -3   8  -6    1.60    2.10
   3  -8  -6    4.20    1.50
  -3  -8   6    2.90    0.90
   3   8   6    2.40    1.10
   3   8   6    5.40    1.50
   4  -8   6   44.90    4.30
   4  -8   6   47.00    4.40
  -4   8   6   42.60    5.90
  -4  -8  -6   53.19    3.60
   4   8  -6   43.80    4.10
  -4  -8   6   44.10    3.50
   4   8   6   46.50    4.00
   4   8   6   47.40    4.30
   4   8   6   46.40    3.90
  -4   8  -6   45.30    6.70
   4  -8  -6   48.40    4.20
   5  -8   6  151.28    9.60
   5  -8   6  165.88    9.90
  -5  -8  -6  160.38    8.70
   5   8  -6  143.09    9.20
   5   8   6  139.59    8.70
   5  -8  -6  176.68    9.80
  -5  -8   6  158.78    8.70
   5   8   6  172.28   10.20
   5   8   6  173.88    9.20
   6   8  -6  119.89    6.60
   6   8   6  104.99    6.50
  -6  -8   6  117.89    6.10
   0  -9  -6    1.60    0.60
   0  -9   6    1.00    0.50
   0   9  -6   -1.80    2.70
  -1  -9  -6  473.05   23.90
   1  -9   6  476.85   23.20
   1   9  -6  430.26   32.80
   1  -9   6  470.65   24.90
  -1  -9   6  491.95   23.90
   1   9   6  512.35   24.80
  -1   9  -6  453.15   29.00
   2   9  -6   15.60    2.20
   2  -9   6   20.50    2.60
   2  -9   6   22.40    2.60
   2  -9  -6   16.30    1.60
  -2   9  -6   12.70    4.20
  -2  -9   6   17.30    1.90
   2   9   6   19.20    2.30
   2   9   6   20.50    2.40
   3   9  -6   34.10    3.30
   3  -9   6   34.90    3.40
  -3  -9  -6   39.90    2.90
   3   9   6   35.10    3.30
  -3  -9   6   35.20    2.80
   3   9   6   34.70    3.10
   3  -9  -6   38.50    3.70
   4   9  -6  101.29    6.40
   4  -9   6   99.39    7.00
  -4  -9  -6   99.49    5.90
   4  -9   6  100.19    6.60
  -4  -9   6  100.09    5.90
   4  -9  -6  104.49    6.40
   4   9   6  106.79    6.10
   4   9   6  103.09    6.40
   5   9  -6  187.68   10.00
  -5  -9  -6  187.08    9.70
  -5  -9   6  194.18    9.70
   0 -10   6    1.70    0.60
   0  10   6    1.20    0.60
   0 -10  -6    1.30    0.50
   0  10   6    1.30    0.90
   1 -10   6   24.30    2.50
  -1 -10  -6   28.50    2.10
   1  10  -6   26.40    2.60
   1 -10   6   23.40    2.50
   1  10   6   25.20    2.40
   1  10   6   23.70    2.30
  -1 -10   6   28.50    2.00
   1 -10  -6   25.60    1.80
  -1 -10   6   21.70    2.20
  -2 -10  -6   14.30    1.40
   2  10  -6   13.00    1.70
   2 -10   6   12.00    1.70
   2 -10   6   13.70    1.80
   2 -10  -6   11.10    1.80
  -2 -10   6   11.60    1.20
   2  10   6   12.50    1.50
   2  10   6   12.00    1.50
   3 -10   6   30.40    3.00
   3  10  -6   34.20    2.70
  -3 -10  -6   37.80    2.50
   3 -10   6   34.00    2.60
   3 -10  -6   34.70    2.60
   3  10   6   33.00    2.60
  -3 -10   6   36.50    2.40
   0   0  -7   -0.50    2.00
   0   0   7    2.50    0.50
  -1   0   7 5590.14  271.77
   1   0   7 6060.09  272.17
  -1   0  -7 6212.08  273.47
  -1   0  -7 5146.78  280.57
   2   0  -7    1.60    2.30
   3   0   7 1201.68   55.69
  -3   0  -7 1222.88   54.69
   3   0   7 1108.19   54.89
   3   0  -7  962.40   62.89
   4   0   7  598.44   30.10
   4   0   7  629.14   30.20
   4   0   7  555.14   30.30
   4   0   7  552.14   29.50
   4   0  -7  553.04   37.70
   4   0   7  613.74   29.60
   4   0  -7  519.05   29.00
   5   0   7 3035.80  137.29
   5   0   7 2757.72  137.49
   5   0   7 2915.51  136.59
   5   0  -7 2895.01  144.09
   5   0   7 3046.90  137.19
   5   0   7 2910.11  137.79
   5   0   7 3054.89  135.59
  -5   0   7 2437.76  134.89
   5   0   7 2765.02  135.19
   5   0  -7 2605.44  135.59
   5   0  -7 2966.80  135.29
   5   0   7 2908.61  134.99
   5   0  -7 2490.15  135.19
   6   0   7  353.86   17.90
   6   0   7  352.56   19.60
   6   0   7  367.96   20.10
   6   0   7  346.07   19.70
   6   0   7  330.47   18.30
   6   0   7  347.97   19.80
   6   0   7  352.26   20.70
   6   0   7  340.67   18.10
   6   0  -7  318.97   18.50
   6   0  -7  333.87   18.10
   7   0  -7  319.07   17.00
   7   0   7  295.07   17.30
   7   0   7  335.57   19.70
   7   0   7  348.27   18.70
   7   0   7  333.67   17.30
   8   0   7  464.75   25.00
   8   0   7  459.25   26.50
   8   0   7  477.75   24.10
   8   0  -7  531.45   24.90
   8   0  -7  459.75   24.30
   9   0  -7    0.80    0.50
   0   1  -7  143.19   13.40
   0   1  -7  122.89    9.70
   0  -1  -7  122.99   12.90
   0  -1   7  120.29    7.00
   0   1   7  137.99    6.80
   1   1  -7   92.99   10.70
   1   1  -7   90.59    7.20
  -1  -1  -7   73.79   10.00
   1  -1   7   97.79    5.30
  -1   1   7   86.79    4.60
   1  -1  -7   85.89   10.60
   1   1   7   93.89    5.80
   1   1   7   97.39    5.20
  -1   1  -7   78.69   11.40
   2   1  -7 1432.06   72.09
   2   1  -7 1414.36   77.89
   2  -1   7 1509.95   68.59
   2   1   7 1482.95   75.09
   2  -1  -7 1332.67   77.49
   2   1   7 1425.56   68.49
   2   1   7 1370.16   69.29
   3  -1   7   88.49    5.50
   3  -1   7   77.59    5.30
   3   1  -7   68.09   10.10
   3  -1  -7   74.09   10.50
  -3   1  -7   85.69    5.60
   3   1   7   88.69    5.70
   3   1   7   78.19    6.10
   4  -1   7   88.29    7.10
   4  -1   7   89.89    6.40
   4  -1   7   97.49    5.70
   4  -1   7  100.19    6.80
   4   1  -7   92.59    6.40
   4   1  -7   86.09   11.90
   4  -1   7  105.59    6.60
   4   1   7  101.79    7.30
  -4   1  -7  102.89    6.70
   4  -1  -7   84.39    6.10
   4   1   7  102.69    6.80
   4   1   7   94.59    7.60
   4   1   7   98.49    7.20
   4  -1  -7   83.29   11.60
   4   1   7   94.89    6.60
   5   1  -7  220.78   19.20
   5   1  -7  238.48   12.50
   5  -1   7  239.08   12.50
   5  -1   7  256.37   14.10
   5  -1   7  231.78   13.80
  -5   1   7  196.78   12.60
   5  -1   7  224.58   14.50
   5   1  -7  208.88   12.80
   5  -1   7  237.98   12.40
   5  -1   7  255.87   14.30
   5   1  -7  215.48   13.10
   5  -1   7  254.37   12.70
   5   1   7  241.18   13.10
   5   1   7  243.68   14.60
   5   1   7  223.48   12.70
  -5  -1   7  199.08   12.30
   5   1   7  225.08   14.60
   5   1   7  236.18   13.80
   5   1   7  246.28   13.80
   5  -1  -7  230.08   19.00
   5   1   7  231.78   14.40
   5   1   7  232.38   12.30
  -5   1  -7  231.98   13.50
   5  -1  -7  215.48   12.40
   5  -1  -7  217.58   12.90
   6   1  -7   33.00    3.20
   6  -1   7   35.30    3.90
   6  -1   7   34.40    2.90
   6  -1   7   34.00    3.00
   6  -1   7   36.50    4.00
   6  -1   7   34.20    4.40
   6  -1   7   35.10    4.50
   6   1  -7   33.00    3.40
   6  -1   7   39.60    3.40
   6   1  -7   40.10    3.20
   6  -1  -7   32.10    2.90
   6   1   7   40.20    3.50
   6   1   7   39.70    4.40
   6   1   7   24.50    4.10
   6  -1  -7   37.10    3.50
   6   1   7   35.90    4.50
   6   1   7   30.60    3.10
   6   1   7   36.00    2.90
   6   1   7   25.40    4.70
   7  -1   7  312.57   18.80
   7   1  -7  310.27   18.10
   7  -1   7  329.87   16.80
   7   1  -7  320.07   17.10
   7  -1   7  312.57   16.90
   7  -1   7  326.27   17.00
   7  -1   7  310.57   18.00
   7  -1   7  309.77   19.90
   7   1   7  350.96   20.90
   7  -1  -7  322.77   17.50
   7   1   7  316.07   18.80
   7   1   7  328.77   17.00
   7   1   7  312.57   18.90
   7   1   7  306.57   17.20
   7  -1  -7  332.67   16.70
   7   1   7  332.67   16.70
   8  -1   7  105.99    8.20
   8   1  -7  118.09    6.60
   8  -1   7   93.99    7.90
   8  -1   7  112.89    7.80
   8   1  -7  104.49    6.70
   8   1   7  118.79    8.60
   8   1   7  122.79    6.50
   8   1   7  118.89    7.80
   8   1   7   98.39    7.40
   8   1   7  110.29    6.70
   8  -1  -7  105.49    6.60
   9   1  -7  315.97   15.10
   9  -1   7  252.97   16.50
   9  -1  -7  331.67   15.60
   0   2  -7   53.09    8.20
   0   2   7   56.69    3.40
   0   2  -7   55.89    4.90
  -1  -2  -7  139.79   14.80
   1  -2   7  160.48    8.40
   1   2  -7  148.39   10.50
   1   2  -7  142.79   14.40
   1  -2   7  163.88    7.90
  -1   2  -7  124.39   13.90
   1   2   7  153.38    9.30
   1   2   7  133.19    8.00
  -1   2  -7  167.68    9.50
   2   2  -7 1538.45   83.39
   2   2  -7 1684.43   90.29
   2  -2   7 1783.12   79.19
   2  -2   7 1822.12   80.29
  -2   2  -7 1727.63   81.09
   2  -2  -7 1594.04   90.09
   2   2   7 1585.44   79.89
   2   2   7 1571.04   88.09
   3   2  -7 3047.20  166.18
   3  -2   7 3090.79  155.28
   3  -2   7 3565.34  154.38
   3   2   7 3283.17  155.58
   3   2   7 3419.76  161.38
   3   2   7 3043.50  156.78
   3  -2  -7 3333.67  167.08
   4  -2   7  256.67   14.90
   4  -2   7  237.98   14.60
   4  -2   7  269.37   13.00
   4   2  -7  227.58   21.60
   4  -2   7  248.28   13.70
   4  -2   7  244.98   12.90
   4  -2  -7  264.67   22.20
   4   2   7  231.78   15.60
   4   2   7  239.18   14.50
   4   2   7  240.68   13.50
   4   2   7  230.78   15.00
   4  -2  -7  221.78   13.10
   5   2  -7  216.28   20.10
   5   2  -7  230.18   12.60
   5  -2   7  256.17   13.70
   5   2  -7  220.88   13.20
   5  -2   7  247.78   12.70
   5  -2   7  218.38   13.90
   5  -2   7  222.48   13.60
   5  -2   7  237.48   12.40
   5  -2   7  248.88   12.50
  -5   2   7  209.28   12.50
   5   2  -7  223.98   13.20
   5  -2   7  229.48   14.80
   5  -2  -7  239.28   20.10
   5   2   7  227.18   12.20
   5   2   7  247.18   14.10
   5   2   7  247.28   13.40
  -5   2  -7  246.08   14.40
   5   2   7  233.18   13.60
   5   2   7  247.08   14.90
   5  -2  -7  233.98   12.40
  -5  -2   7  198.68   12.40
   5   2   7  244.78   14.80
   5   2   7  225.98   13.00
   5  -2  -7  222.28   12.90
   5   2   7  227.88   15.10
   6  -2   7  811.02   44.10
   6  -2   7  847.92   43.00
   6  -2   7  853.01   41.10
   6   2  -7  809.42   42.00
   6   2  -7  805.92   41.90
   6  -2   7  897.91   41.30
   6   2  -7  830.02   41.20
  -6   2   7  822.62   41.30
   6  -2   7  818.92   43.10
   6   2   7  892.61   44.10
  -6  -2   7  800.12   41.10
   6   2   7  840.42   41.70
   6   2   7  826.92   44.70
   6   2   7  829.02   43.10
   6   2   7  856.11   43.20
   6   2   7  821.92   43.80
   6   2   7  854.01   42.10
   6  -2  -7  817.32   41.60
   6   2   7  847.72   40.90
   7   2  -7  202.88   11.80
   7  -2   7  186.98   12.50
   7  -2   7  195.08   11.70
   7   2  -7  200.38   11.10
   7   2  -7  199.38   11.50
   7  -2   7  206.48   14.00
   7  -2  -7  199.28   11.30
   7   2   7  199.88   11.70
   7   2   7  202.58   11.30
   7   2   7  202.68   13.50
   7   2   7  194.38   13.30
   7   2   7  204.48   10.80
   7   2   7  218.38   13.00
   8  -2   7   32.30    4.00
   8   2  -7   37.60    2.80
   8   2  -7   35.00    3.00
   8  -2   7   39.60    3.80
   8   2   7   34.60    3.70
   8   2   7   39.40    2.80
   8  -2  -7   34.60    3.20
   8   2   7   37.80    3.10
   9  -2   7  383.56   19.50
   9   2  -7  399.06   18.90
   9  -2   7  351.26   19.50
   9  -2  -7  404.76   18.70
   0   3   7 1268.57   63.59
   0  -3  -7 1305.97   74.39
   0   3  -7 1324.37   72.99
   1   3  -7  886.11   52.59
  -1  -3  -7  806.12   53.49
   1  -3   7  853.81   42.20
   1   3   7  794.22   43.40
   1   3   7  900.21   42.40
  -1   3  -7  979.50   44.40
  -1   3  -7  858.81   52.49
   1  -3  -7  866.21   53.49
   2   3  -7 2293.17  114.89
   2   3   7 1930.61  113.79
   2   3   7 2128.59  102.39
   2  -3  -7 2191.08  114.99
   3   3  -7  339.77   23.00
   3  -3   7  347.07   18.70
   3   3  -7  363.36   28.90
   3  -3   7  346.67   19.80
   3  -3  -7  386.96   29.30
   3   3   7  364.16   26.80
   3   3   7  334.27   20.70
   3   3   7  348.77   20.00
   3   3   7  382.46   19.20
  -3   3  -7  386.06   20.30
   4   3  -7 1328.57   78.99
   4   3  -7 1328.47   66.29
  -4   3   7 1252.67   67.69
   4  -3   7 1357.26   67.69
   4  -3   7 1363.76   66.29
   4  -3   7 1388.16   67.19
   4   3   7 1375.76   68.69
  -4   3  -7 1452.05   67.99
   4   3   7 1398.56   67.39
   4   3   7 1420.76   66.39
   4   3   7 1334.67   66.59
   4   3   7 1397.16   66.49
   4   3   7 1328.87   66.59
   4  -3  -7 1207.98   65.39
   4  -3  -7 1481.75   79.19
  -4  -3   7 1254.27   65.89
   5  -3   7   17.60    3.20
   5   3  -7   20.40    3.60
   5  -3   7   14.60    2.50
  -5   3   7   17.30    2.20
   5   3  -7   18.20    2.10
   5   3  -7   13.00    2.40
   5   3   7   19.70    2.50
   5  -3  -7   17.50    2.10
  -5  -3   7   20.20    2.10
   5  -3  -7   19.80    8.30
   5   3   7   17.80    3.00
   5   3   7   16.10    3.90
   5   3   7   16.60    2.90
   5   3   7   13.90    2.30
   6   3  -7  171.08   10.40
   6  -3   7  168.68   11.40
   6  -3   7  168.78   12.00
   6   3  -7  178.98    9.70
   6   3  -7  161.08   10.30
   6  -3   7  155.18   12.80
   6  -3  -7  161.58    9.70
   6   3   7  163.58   11.60
   6   3   7  183.98   12.60
  -6   3  -7  171.88   14.80
   6   3   7  187.48   15.50
  -6  -3   7  158.48    9.50
   6   3   7  175.08   10.60
   6   3   7  172.78   10.20
   7   3  -7   18.40    2.20
   7  -3   7   16.90    2.70
   7   3  -7   17.90    2.10
   7  -3   7   12.60    2.70
   7   3  -7   12.90    1.70
   7   3   7   18.00    3.00
   7   3   7   19.00    2.20
   7  -3  -7   15.00    1.80
   7   3   7   14.40    2.10
   8  -3   7  146.39    9.30
   8  -3   7  145.39    9.60
   8   3  -7  150.38    8.30
   8   3  -7  145.49    8.10
   8   3   7  147.89    8.40
   8   3   7  134.19    9.30
   8   3   7  161.18    8.10
   8  -3  -7  145.99    7.90
   0   4  -7 1139.49   66.29
   0   4  -7 1232.78   61.29
   0  -4  -7 1059.69   67.29
   0   4   7 1031.10   55.09
  -1  -4  -7  911.81   61.49
   1   4  -7 1043.40   60.39
   1  -4   7  970.70   47.40
   1   4  -7  961.60   51.39
   1   4   7  928.81   49.10
   1  -4  -7 1045.60   61.79
  -2   4   7  173.18    9.80
   2   4  -7  184.98   19.10
   2  -4   7  156.48    9.60
   2   4  -7  167.28   13.40
  -2  -4   7  167.38   10.30
  -2   4  -7  177.88   11.60
   2  -4  -7  181.98   19.30
   2   4   7  178.38   11.90
   3   4  -7   66.19    5.30
   3  -4   7   75.79    5.80
   3  -4   7   74.49    6.00
   3   4  -7   63.89    8.20
  -3   4   7   73.79    4.90
   3   4  -7   61.39   13.00
   3  -4   7   72.29    5.20
   3   4   7   74.49    6.10
  -3  -4   7   65.59    5.20
   3   4   7   78.19    7.10
  -3   4  -7   73.39    6.60
   3  -4  -7   74.19   12.10
   3   4   7   71.79    5.20
   4  -4   7  428.56   23.00
   4   4  -7  408.26   23.20
  -4   4   7  435.26   22.50
   4   4  -7  433.76   23.10
   4  -4   7  434.26   23.90
   4   4  -7  432.66   35.10
   4  -4   7  417.96   24.40
   4   4   7  436.46   25.70
  -4   4  -7  428.26   24.90
   4   4   7  424.06   24.50
   4   4   7  449.56   23.30
   4  -4  -7  479.85   23.60
   4   4   7  471.05   24.10
   4   4   7  433.86   23.00
   4  -4  -7  458.25   34.60
  -4  -4   7  430.26   22.30
   5   4  -7  632.04   31.30
   5  -4   7  565.44   32.90
   5  -4   7  624.84   31.80
   5   4  -7  589.04   31.50
   5   4  -7  580.64   30.30
   5  -4   7  584.24   32.20
   5   4   7  634.14   31.30
   5   4   7  609.04   34.40
  -5  -4   7  612.64   30.50
   5   4   7  626.44   33.20
   5  -4  -7  586.84   30.30
  -5   4  -7  647.24   33.80
   5   4   7  624.14   31.70
   6   4  -7   36.20    4.30
   6   4  -7   39.00    3.90
   6   4  -7   35.30    3.00
   6  -4   7   39.20    4.70
   6   4   7   39.80    3.90
  -6  -4   7   35.90    3.00
   6  -4  -7   36.00    3.00
  -6   4  -7   31.70    5.80
   6   4   7   36.40    4.40
   7   4  -7  350.66   18.20
   7   4  -7  361.26   17.60
   7  -4   7  346.17   20.10
   7  -4   7  356.56   19.80
   7   4  -7  334.77   18.30
   7  -4  -7  346.77   18.50
   7   4   7  324.57   18.50
   7   4   7  357.66   18.20
   7   4   7  352.86   20.40
   8  -4   7  101.09    8.30
   8   4  -7  118.89    6.60
   8  -4   7  126.39    7.50
   8   4  -7  116.79    6.70
   8   4   7  118.49    6.90
   8   4   7  140.79    7.70
   8   4   7  116.49    7.60
   0  -5   7  191.18   10.80
   0  -5  -7  180.38   11.20
   0   5  -7  219.48   14.50
   0   5   7  206.38   11.80
   0   5  -7  201.28   22.10
   0   5   7  195.98   12.40
   1   5  -7 1537.65   86.09
   1  -5   7 1408.06   69.79
  -1  -5  -7 1386.16   72.19
   1  -5   7 1403.86   69.39
   1   5  -7 1495.55   75.59
  -1  -5   7 1465.25   69.79
  -1   5  -7 1419.46   73.19
   1  -5  -7 1477.15   87.09
   1  -5  -7 1417.46   69.69
   2   5  -7  184.28   15.90
   2   5  -7  240.58   23.70
  -2  -5  -7  222.38   12.10
   2  -5   7  224.68   12.20
  -2   5   7  218.28   13.00
   2  -5   7  214.18   12.90
   2  -5  -7  212.18   11.80
   2   5   7  225.28   13.60
   2  -5  -7  241.28   24.10
   2   5   7  228.98   14.60
  -2   5  -7  206.28   14.40
   2   5   7  217.28   12.50
  -2  -5   7  225.18   12.00
   3   5  -7  692.53   48.50
   3  -5   7  647.24   34.30
  -3  -5  -7  670.13   32.70
   3   5  -7  607.44   33.50
   3  -5   7  663.13   34.10
   3  -5   7  668.63   33.10
   3   5  -7  623.34   38.80
   3   5   7  675.33   33.40
   3   5   7  644.04   34.60
   3   5   7  667.33   33.40
  -3   5  -7  622.74   35.60
   3   5   7  648.54   35.80
   3  -5  -7  630.84   32.00
  -3  -5   7  662.23   32.70
   3  -5  -7  693.73   48.40
   4   5  -7  168.68   10.00
   4   5  -7  149.09   10.20
   4   5  -7  148.39   19.10
   4  -5   7  164.88   11.30
  -4  -5  -7  150.58   10.50
   4  -5   7  174.28   10.30
   4  -5   7  166.58   10.90
  -4  -5   7  163.18    9.40
   4   5   7  156.88   10.20
   4   5   7  171.88   12.70
   4   5   7  168.08   10.10
   4  -5  -7  173.28   20.10
   4  -5  -7  141.89   13.00
   4   5   7  188.98   11.70
   5   5  -7   21.00    7.90
   5  -5   7   36.50    4.50
   5  -5   7   28.00    4.90
   5  -5   7   33.90    3.90
   5   5  -7   31.30    3.50
   5   5  -7   36.20    3.30
   5  -5  -7   33.50    3.70
  -5   5  -7   37.90    5.50
   5  -5  -7   39.90    9.50
  -5  -5   7   34.70    3.00
   5   5   7   31.50    4.10
   5   5   7   37.20    3.60
   5   5   7   34.10    3.70
   5   5   7   34.90    5.80
   6   5  -7   61.59    4.40
   6  -5   7   60.79    5.60
   6  -5   7   60.69    5.70
   6   5  -7   56.09    4.70
  -6   5  -7   57.69    6.70
   6   5   7   60.49    4.60
   6   5   7   61.99    5.90
  -6  -5   7   55.09    4.10
   6   5   7   57.99    5.00
   7  -5   7    4.10    1.50
   7   5  -7    3.50    0.90
   7   5  -7    2.70    1.00
   7  -5   7    4.30    1.50
   7   5   7    5.10    1.30
  -7  -5   7    2.90    1.10
   7   5   7    2.40    0.90
   7   5   7    3.90    1.30
   8  -5   7    4.20    1.00
   8  -5   7    3.60    0.90
   8   5   7    2.80    1.00
   8   5   7    4.50    1.00
   0  -6   7  428.26   22.00
   0  -6  -7  424.26   22.20
   0  -6  -7  441.26   40.50
   0   6  -7  439.06   38.70
   0   6   7  428.86   24.20
   0   6  -7  441.56   27.10
  -1   6   7  404.06   21.80
   1   6  -7  399.46   40.10
  -1  -6  -7  396.96   19.90
   1   6  -7  328.47   24.00
   1  -6   7  358.06   19.80
   1  -6   7  395.26   19.50
  -1   6   7  382.16   21.50
  -1  -6   7  383.66   19.80
  -1   6  -7  413.66   24.80
   1  -6  -7  372.36   19.70
   1   6   7  372.56   22.20
  -2   6   7    2.60    1.80
   2   6  -7    5.00    6.20
   2   6  -7    2.50    2.70
  -2  -6  -7    1.80    0.80
   2  -6   7    0.90    1.00
   2  -6   7    3.70    1.40
  -2   6  -7    4.70    2.10
  -2  -6   7    2.80    1.10
   2   6   7    3.60    1.70
   2  -6  -7    1.30    0.80
   2  -6  -7    6.90    6.30
   2   6   7    4.10    1.30
   2   6   7    2.80    2.10
   3   6  -7  807.72   48.50
   3  -6   7  870.81   43.10
  -3  -6  -7  861.11   41.50
   3   6  -7  742.23   42.30
   3  -6   7  817.62   43.10
  -3   6   7  751.82   45.20
   3   6  -7  849.61   59.19
   3  -6   7  867.51   42.10
  -3   6  -7  860.91   45.30
  -3  -6   7  875.11   41.50
   3   6   7  836.82   43.50
   3   6   7  847.92   45.10
   3   6   7  851.21   42.20
   3  -6  -7  884.71   59.59
   3  -6  -7  850.61   40.80
   3   6   7  829.22   42.30
  -4  -6  -7  278.97   14.40
   4   6  -7  273.57   14.40
   4   6  -7  243.78   15.20
   4  -6   7  261.07   16.20
   4  -6   7  247.68   15.60
   4  -6   7  252.17   16.10
   4   6  -7  262.07   27.70
   4  -6  -7  260.27   26.60
  -4   6  -7  251.57   18.50
  -4  -6   7  271.77   14.40
   4   6   7  253.67   16.20
   4  -6  -7  299.17   15.70
   4   6   7  272.57   15.60
   4   6   7  266.07   15.00
   4   6   7  267.77   18.20
   5  -6   7  462.45   25.20
   5   6  -7  435.16   23.80
   5   6  -7  369.26   35.30
  -5  -6  -7  464.95   22.70
   5   6   7  471.05   23.60
  -5   6  -7  469.65   26.70
   5   6   7  444.86   24.20
   5   6   7  413.76   24.60
  -5  -6   7  433.86   22.70
   5  -6  -7  487.75   23.90
   6  -6   7  170.08   10.90
  -6   6   7  165.28   12.70
   6   6  -7  172.48   10.30
   6  -6   7  172.08   11.30
   6   6   7  167.58   11.00
   6   6   7  176.88   10.80
   6   6   7  194.58   10.20
  -6  -6   7  180.68   10.10
   7   6  -7   92.19    5.40
   7  -6   7   89.39    5.90
   7  -6   7   95.49    6.20
   7   6   7   79.89    6.50
  -7  -6   7   81.69    5.10
   7   6   7   80.89    5.60
   7   6   7  100.39    5.20
   0   7  -7  282.67   20.80
   0   7   7  304.47   18.70
   0  -7  -7  301.47   16.20
   0  -7   7  314.87   16.10
   0  -7   7  316.37   16.50
   1   7  -7  244.78   18.90
   1  -7   7  257.87   14.00
  -1  -7  -7  252.37   13.70
   1  -7   7  250.57   13.20
  -1   7   7  248.28   15.70
   1   7  -7  260.07   29.10
   1   7   7  240.28   14.90
   1  -7  -7  259.37   31.30
   1  -7  -7  248.48   13.50
  -1  -7   7  248.48   13.60
  -1   7  -7  258.77   18.10
   1   7   7  233.68   15.90
  -2   7   7  647.44   33.90
   2  -7   7  613.44   31.50
   2   7  -7  564.24   37.40
  -2  -7  -7  616.44   31.10
   2  -7   7  611.54   32.40
   2   7  -7  667.33   51.09
   2  -7  -7  602.74   30.60
   2   7   7  588.74   32.50
   2   7   7  613.94   31.80
   2   7   7  612.34   34.30
   2  -7  -7  641.94   51.69
  -2  -7   7  648.34   31.20
   3   7  -7   90.39    7.20
   3   7  -7   92.29   10.90
   3  -7   7  103.99    7.70
  -3  -7  -7  101.69    6.50
   3   7  -7  104.49   17.50
   3  -7   7   95.79    7.60
  -3   7   7   95.49    8.50
   3  -7   7   95.19    7.30
  -3   7  -7  101.59    9.50
  -3  -7   7  102.39    6.50
   3   7   7  108.29    7.20
   3   7   7  110.99    9.40
   3   7   7  103.59    7.50
   3   7   7   98.89    7.60
   3  -7  -7  106.59   19.30
   4  -7   7   10.60    2.10
   4   7  -7   15.40    2.50
   4  -7   7   16.00    2.60
   4   7  -7    7.20    8.90
  -4   7   7    8.00    3.00
  -4  -7  -7   14.40    1.70
   4   7   7   13.70    2.20
   4   7   7   11.10    2.20
  -4   7  -7   13.90    3.50
  -4  -7   7   13.00    1.70
   4  -7  -7   10.70    7.50
   4   7   7   10.50    2.00
   4   7   7   15.40    6.60
   4  -7  -7    9.80    2.00
   5  -7   7  351.76   21.00
   5  -7   7  369.06   20.80
  -5   7   7  365.16   22.60
   5   7  -7  362.06   20.20
   5   7   7  398.56   19.90
   5  -7  -7  396.36   20.10
   5   7   7  426.66   21.30
  -5  -7   7  384.46   19.40
  -5   7  -7  366.46   23.30
   6   7  -7  124.49    7.70
   6  -7   7  133.59    8.30
   6  -7   7  135.59    8.40
   6   7   7  117.59    8.00
  -6  -7   7  127.09    7.90
   6   7   7  145.39    8.30
   6   7   7  138.59    7.40
   0   8   7 1079.49   59.69
   0  -8  -7 1143.39   55.69
   0   8  -7 1172.48   62.49
   0  -8   7 1168.58   55.49
   1   8  -7  210.88   18.00
  -1  -8  -7  224.28   12.40
   1  -8   7  217.98   12.50
  -1   8  -7  237.18   17.50
   1  -8  -7  219.28   12.30
  -1  -8   7  243.98   12.50
   1   8   7  224.78   13.30
  -2  -8  -7   98.69    6.60
   2  -8   7  118.39    7.80
   2  -8  -7  107.79    6.20
   2   8   7  104.99    7.40
   2   8   7  109.59    7.20
  -2   8  -7  105.09   10.30
  -2  -8   7  103.19    6.60
   2   8   7   99.09    7.20
   3  -8   7   81.89    6.40
   3   8  -7   75.99    6.10
  -3  -8  -7   88.09    5.60
   3  -8   7   81.99    6.50
  -3  -8   7   75.09    5.30
  -3   8  -7   94.99    9.20
   3   8   7   80.89    5.80
   3   8   7   86.79    6.40
   3  -8  -7   81.99    6.30
   3   8   7   84.69    6.30
   4   8  -7   97.49    6.80
   4  -8   7   91.99    7.00
   4  -8   7  103.39    7.40
  -4  -8  -7  108.19    6.20
   4  -8  -7  108.79    7.40
   4   8   7   92.69    6.70
  -4  -8   7  104.29    6.20
   4   8   7  113.29    7.30
   4   8   7  108.19    7.30
  -4   8  -7   98.69    9.30
   5   8  -7   61.59    4.30
   5  -8   7   62.59    4.70
  -5  -8  -7   59.39    3.80
   5  -8   7   63.29    4.70
   5   8   7   59.59    4.50
   5   8   7   68.19    4.40
   5  -8  -7   52.49    3.90
   5   8   7   54.49    3.90
  -5  -8   7   61.29    3.90
   6   8  -7   43.10    2.70
   6  -8   7   33.30    2.80
  -6  -8   7   37.90    2.40
   6   8   7   44.00    3.20
   0  -9  -7    3.60    0.90
   0  -9   7    3.00    1.20
   0  -9   7    3.90    0.90
   0   9  -7    2.80    4.30
   1  -9   7   31.10    2.20
   1  -9   7   33.60    3.30
  -1  -9  -7   34.30    2.80
   1   9  -7   26.40    6.60
   1  -9  -7   36.60    2.70
  -1   9  -7   28.60    8.00
   1   9   7   38.10    3.50
  -1  -9   7   34.90    2.70
   2  -9   7  119.09    8.00
  -2  -9  -7  122.69    7.10
   2   9  -7  121.09    7.80
   2  -9   7  117.59    7.80
  -2  -9   7  119.19    7.00
   2   9   7  124.99    7.90
  -2   9  -7  105.89   10.60
   2   9   7  133.89    7.50
   2  -9  -7  117.39    6.40
   3  -9   7   29.50    3.10
  -3  -9  -7   30.60    3.00
   3   9  -7   33.40    3.10
   3  -9   7   30.20    2.90
  -3  -9   7   29.70    2.50
   3   9   7   33.30    3.10
   3  -9  -7   31.00    3.00
   4  -9   7   57.99    4.40
  -4  -9  -7   58.79    4.10
   4  -9   7   58.39    4.40
   4   9  -7   70.29    5.60
   4   9   7   61.79    3.90
   4  -9  -7   58.99    4.00
  -4  -9   7   65.19    3.90
   4   9   7   62.29    4.30
   0  10   7    5.50    1.00
   0 -10   7    3.90    0.70
   0 -10   7    4.00    1.10
   0 -10  -7    4.30    0.80
   1 -10   7    8.10    1.60
   1 -10   7    8.90    1.40
  -1 -10  -7    8.80    1.10
   1  10  -7    9.80    1.40
   1 -10  -7    7.40    0.90
  -1 -10   7    8.60    1.10
   1  10   7    8.10    1.20
   2 -10   7  261.77   13.90
   2  10  -7  271.87   13.80
  -2 -10  -7  272.27   13.20
   2 -10   7  241.58   13.60
   2 -10  -7  267.57   14.10
   2  10   7  243.48   13.60
   3 -10   7    2.30    0.80
  -3 -10  -7    2.90    0.70
   3  10  -7    4.30    0.90
   3 -10   7    3.70    0.80
   3  10   7    1.30    0.70
  -3 -10   7    5.10    0.80
   0   0  -8 2184.48  117.99
   0   0  -8 2281.27  109.89
   0   0   8 2326.17  108.49
  -1   0  -8 1308.67   63.39
   1   0  -8 1185.78   71.49
   1   0   8 1356.36   61.99
  -1   0   8 1308.87   61.49
   2   0   8  496.55   23.50
  -2   0  -8  434.96   23.20
   2   0  -8  394.46   31.10
   2   0   8  463.25   22.70
  -2   0   8  457.15   21.80
  -3   0   8  125.89    6.30
  -3   0  -8  119.79    7.50
   3   0  -8  114.39   14.10
   3   0   8  128.69    7.80
   3   0   8  135.19    8.30
   4   0   8    1.30    1.30
   4   0   8    2.80    1.10
   4   0  -8    1.40    3.50
   4   0   8    2.40    1.30
   4   0   8    4.70    1.20
   4   0  -8    1.80    0.80
   4   0   8    2.30    0.70
   5   0  -8  545.15   29.80
  -5   0   8  549.65   29.70
   5   0   8  627.84   31.80
   5   0   8  600.04   29.80
   5   0  -8  588.34   39.20
   5   0   8  602.84   32.20
   5   0  -8  554.64   30.40
   5   0   8  601.04   31.30
   5   0   8  653.43   31.90
   5   0   8  621.24   29.60
   5   0   8  614.74   30.10
   6   0  -8  712.03   37.50
  -6   0   8  742.63   36.70
   6   0   8  730.43   38.70
   6   0   8  740.23   39.70
   6   0   8  797.92   39.00
   6   0   8  740.83   38.80
   6   0   8  763.22   36.80
   6   0   8  767.72   37.10
   6   0   8  751.12   36.60
   6   0   8  699.03   38.30
   6   0  -8  717.13   36.70
   7   0   8  108.89    9.40
   7   0   8   98.49    6.60
   7   0   8  101.29    7.70
   7   0  -8  103.69    6.30
   7   0   8  123.39    8.30
   7   0   8  109.99    6.40
   7   0  -8   92.69    6.80
   8   0   8  112.49    8.50
   8   0   8  119.09    7.10
   8   0  -8  125.79    7.50
   8   0   8  146.69    9.00
   8   0   8  130.99    9.20
   9   0  -8   24.70    1.90
   0   1   8 1066.89   50.79
   0  -1  -8  972.30   64.39
   0  -1   8 1061.79   50.89
   0   1  -8 1135.29   53.59
   1   1  -8  336.77   26.30
  -1  -1  -8  308.17   27.60
  -1   1   8  368.66   17.30
   1  -1   8  363.96   17.90
   1   1  -8  335.27   20.50
  -1   1  -8  307.57   25.80
   1  -1  -8  334.17   26.30
   1   1   8  375.26   17.90
   1   1   8  378.46   18.70
  -1  -1   8  371.36   17.50
  -1   1  -8  401.46   19.70
   2  -1   8  381.56   18.00
   2  -1   8  366.76   17.70
   2   1  -8  311.17   25.70
  -2   1  -8  359.46   18.40
   2  -1  -8  301.97   25.60
   2   1   8  313.67   18.20
   2   1   8  325.57   17.40
   2   1   8  346.97   24.20
   3  -1   8  154.68    8.70
   3  -1   8  140.19    8.60
   3   1  -8  121.69   15.00
   3   1   8  147.59    9.60
   3   1   8  157.78   12.50
   3   1   8  142.99    8.70
   3  -1  -8  119.39   14.90
  -3   1  -8  162.48    9.10
   4  -1   8 1072.39   53.29
   4  -1   8 1045.30   52.89
   4  -1   8 1045.40   51.79
   4   1  -8  941.71   63.59
   4   1  -8  972.70   52.69
   4  -1   8 1169.38   52.99
   4  -1   8 1041.40   53.89
   4   1   8 1147.89   54.49
   4   1   8 1054.89   54.49
   4   1   8 1086.49   53.19
   4   1   8 1028.90   53.99
   4   1   8 1031.80   51.59
  -4   1  -8 1189.08   53.19
   4   1   8 1161.68   55.69
   4   1   8 1057.99   52.49
   4  -1  -8 1062.59   64.69
   5  -1   8  434.96   23.50
   5  -1   8  455.05   22.00
   5   1  -8  398.46   31.00
   5   1  -8  410.46   22.90
   5  -1   8  403.06   23.30
   5  -1   8  458.55   22.30
   5  -1   8  451.15   24.70
   5  -1   8  455.75   22.00
  -5   1   8  420.26   22.10
   5  -1   8  471.95   23.90
   5   1  -8  435.16   22.10
   5   1  -8  395.76   22.30
  -5  -1   8  406.46   22.10
   5  -1  -8  433.26   22.70
   5   1   8  430.66   23.70
   5   1   8  447.76   22.70
   5   1   8  437.16   24.80
   5  -1  -8  448.46   31.50
   5   1   8  450.35   24.40
   5   1   8  443.26   24.40
   5   1   8  430.16   22.30
   5   1   8  437.76   23.30
   5  -1  -8  412.16   21.90
   5   1   8  436.66   21.90
   6   1  -8 1049.30   54.19
   6   1  -8 1059.49   54.79
   6  -1   8 1093.09   55.99
   6  -1   8 1145.69   54.19
   6  -1   8 1182.58   55.79
   6  -1   8 1094.79   53.89
   6  -1   8 1176.08   53.89
  -6   1   8 1081.29   53.99
   6  -1   8 1097.99   55.79
   6   1   8 1076.99   55.99
   6  -1  -8 1066.09   54.59
   6   1   8 1088.59   56.79
  -6  -1   8 1077.09   53.89
   6   1   8 1076.69   56.79
   6   1   8 1167.48   54.69
   6  -1  -8 1142.69   53.79
   6   1   8 1108.69   53.79
   6   1   8 1140.09   56.59
   6   1   8 1109.49   54.19
   7   1  -8  294.97   15.80
   7  -1   8  309.57   17.00
   7  -1   8  292.67   18.80
   7   1  -8  281.77   16.50
   7  -1   8  290.57   17.40
   7  -1   8  299.67   15.90
   7  -1  -8  285.57   16.20
   7   1   8  309.97   17.80
   7   1   8  320.87   15.90
   7   1   8  335.87   19.20
   7   1   8  290.37   16.10
   7   1   8  309.57   17.60
   8   1  -8   66.29    4.60
   8   1  -8   68.99    4.10
   8  -1   8   70.99    6.20
   8  -1   8   70.69    5.50
   8   1   8   63.79    4.30
   8   1   8   65.79    5.60
   8   1   8   61.09    5.60
   8  -1  -8   59.79    4.30
   9   1  -8   66.89    3.90
   9  -1  -8   67.09    3.80
   0   2  -8  325.87   25.00
   0   2  -8  327.37   18.60
   0  -2  -8  307.97   25.40
   0  -2   8  300.37   16.00
   0   2   8  329.77   16.00
   1  -2   8  953.70   40.40
  -1   2   8  850.51   39.80
  -1  -2  -8  729.93   50.79
   1  -2   8  870.71   40.70
   1   2  -8  838.32   51.19
   1   2   8  804.92   41.70
  -1   2  -8  786.72   50.59
   1   2   8  863.01   40.60
   1  -2  -8  785.42   50.99
   2   2  -8  190.38   18.80
   2  -2   8  199.78   10.90
   2  -2   8  224.48   10.40
   2   2   8  185.28   18.20
   2   2   8  187.28   12.00
   2  -2  -8  187.18   18.80
  -2   2  -8  226.98   12.20
   2   2   8  177.18   10.80
   3  -2   8  530.25   27.20
   3   2  -8  531.15   38.90
   3   2   8  537.55   31.50
   3   2   8  548.95   29.90
   3  -2  -8  559.44   39.00
   3   2   8  617.34   35.20
  -3   2  -8  586.74   29.30
   4  -2   8  597.24   31.70
   4   2  -8  547.65   41.70
  -4   2   8  593.94   30.50
   4  -2   8  582.04   31.20
   4  -2   8  615.14   32.60
   4   2   8  615.54   30.10
  -4   2  -8  681.73   32.30
   4   2   8  647.04   32.80
   4   2   8  656.83   31.60
  -4  -2   8  566.94   30.40
   4  -2  -8  613.84   42.10
   4   2   8  639.64   31.30
   4   2   8  627.14   32.40
   4   2   8  621.74   31.80
   4   2   8  576.54   33.00
   5  -2   8  408.36   20.30
   5   2  -8  339.07   19.50
   5  -2   8  368.36   20.40
  -5   2   8  369.86   19.20
   5   2  -8  332.57   22.80
   5   2  -8  372.96   19.00
   5  -2   8  361.96   21.20
   5  -2   8  413.86   19.20
  -5  -2   8  339.27   18.90
   5   2   8  383.46   19.90
   5   2   8  310.37   22.70
   5   2   8  367.36   19.40
   5  -2  -8  341.97   19.40
   5   2   8  372.06   18.70
  -5   2  -8  406.46   21.20
   5   2   8  333.67   23.80
   5   2   8  387.46   22.20
   5   2   8  358.46   22.60
   5   2   8  410.06   21.70
   6   2  -8  163.38    9.80
   6   2  -8  168.28    9.30
   6  -2   8  156.28   10.70
   6  -2   8  180.68   10.30
   6  -2   8  174.08   12.10
   6  -2   8  150.38   10.90
  -6   2   8  161.48    9.60
   6   2  -8  154.88   10.00
   6   2   8  154.18   11.00
   6  -2  -8  157.58    9.70
  -6  -2   8  151.48    9.30
   6   2   8  168.58    9.60
   6   2   8  165.08   12.30
   6   2   8  156.48   11.30
   6   2   8  157.08    9.90
   6   2   8  172.38   10.80
   6   2   8  158.68   11.40
   7   2  -8  230.28   13.40
   7  -2   8  240.98   15.60
   7  -2   8  223.98   14.40
   7   2  -8  230.58   12.90
   7  -2   8  252.27   13.30
   7   2   8  252.97   12.90
   7   2   8  241.68   15.20
   7   2   8  231.38   14.90
   7  -2  -8  239.58   13.00
   7   2   8  221.88   13.10
   8   2  -8  126.19    7.80
   8  -2   8  125.19    9.20
   8   2   8  139.79    7.00
   8  -2  -8  127.09    7.20
   8   2   8  115.89    8.50
   8   2   8  124.19    7.30
   0   3   8  214.88   12.40
   0  -3   8  198.68   11.00
   0   3  -8  216.28   19.90
   0  -3  -8  209.98   20.40
   1   3  -8   77.79    7.70
  -1  -3  -8   72.29   12.30
   1  -3   8   74.59    4.90
   1   3  -8   75.99   11.20
   1   3   8   74.79    4.80
   1  -3  -8   65.99   11.20
  -1   3  -8   83.99    6.50
  -1   3  -8   70.19   11.40
   1   3   8   73.39    5.90
   2  -3   8  273.87   14.50
   2   3  -8  286.87   24.50
   2   3  -8  251.87   18.30
   2   3   8  258.27   16.20
   2  -3  -8  287.77   25.00
   2   3   8  263.27   14.40
   3  -3   8   97.29    6.80
   3   3  -8  100.99   14.10
   3  -3   8   92.39    7.20
  -3   3   8   93.09    6.00
   3   3  -8   90.39    9.70
   3  -3   8   91.29    6.30
   3   3   8   96.39    7.60
   3   3   8  105.79    6.50
   3   3   8  100.49    6.70
  -3  -3   8   96.29    5.90
   3  -3  -8  102.79   14.10
   3   3   8   99.69    8.20
  -3   3  -8   99.89    7.50
   4  -3   8  120.39    7.90
   4   3  -8  115.59   15.80
  -4   3   8  120.89    7.30
   4   3  -8  116.89    7.90
   4  -3   8  122.89    8.40
   4   3  -8  112.29    7.60
   4  -3   8  119.19    8.70
   4   3   8  129.29   12.20
   4  -3  -8  131.19   16.00
   4   3   8   94.89   12.30
  -4  -3   8  121.09    7.10
   4  -3  -8  107.99    7.10
   4   3   8  126.29    7.80
   4   3   8  126.19    8.60
   4   3   8  111.19    8.20
   4   3   8  114.59    7.80
   5  -3   8   49.90    4.80
   5  -3   8   44.70    5.00
   5   3  -8   36.90    9.50
   5   3  -8   45.20    4.20
   5  -3   8   42.40    4.50
  -5   3   8   47.40    3.80
   5   3  -8   39.10    3.90
   5   3   8   48.30    4.90
   5   3   8   46.70    4.70
   5   3   8   42.80    4.90
  -5  -3   8   45.00    3.70
  -5   3  -8   53.49    5.50
   5   3   8   48.10    4.30
   5   3   8   44.10    4.00
   5  -3  -8   38.90    3.60
   5  -3  -8   48.20    9.80
   5   3   8   38.30    5.60
  -6   3   8  311.67   16.10
   6   3  -8  313.17   16.80
   6   3  -8  308.97   15.70
   6  -3   8  270.17   17.30
   6  -3   8  293.67   18.60
   6   3  -8  301.17   16.50
   6  -3   8  303.07   17.90
   6   3   8  290.27   17.90
   6   3   8  308.47   16.30
   6   3   8  335.77   19.20
  -6  -3   8  294.37   15.80
   6   3   8  293.17   19.40
   6   3   8  291.57   16.60
   6  -3  -8  289.17   16.00
   7   3  -8   54.49    3.80
   7   3  -8   41.50    3.70
   7  -3   8   50.69    4.80
   7  -3   8   41.90    4.80
   7  -3  -8   44.40    3.30
   7   3   8   44.50    3.40
   7   3   8   38.30    4.70
   7   3   8   39.20    3.60
   8  -3   8   10.60    1.80
   8   3  -8    7.60    1.20
   8  -3   8    8.30    1.50
   8   3   8    9.50    1.20
   8   3   8   11.90    1.40
   8  -3  -8   12.00    1.20
   8   3   8    6.50    1.50
   0  -4  -8  162.38   18.60
   0   4  -8  152.38   17.00
   0   4   8  129.29    9.20
   0   4  -8  142.79   10.80
   0  -4   8  138.79    8.60
   1  -4   8  244.08   12.90
   1   4  -8  235.78   16.50
   1   4  -8  249.38   23.50
  -1   4  -8  232.98   15.30
   1  -4  -8  234.78   23.70
  -1  -4   8  235.28   12.60
   1   4   8  239.18   14.50
   1  -4  -8  252.17   13.70
  -1   4  -8  224.98   23.00
   2   4  -8   55.89   11.00
   2   4  -8   56.29    7.20
   2  -4   8   59.19    4.20
  -2   4   8   58.29    4.10
   2  -4  -8   55.89   10.50
  -2  -4   8   57.59    3.90
  -2   4  -8   55.99    5.60
   2   4   8   55.79    5.70
   2  -4  -8   52.49    3.80
   3   4  -8   39.30    9.70
   3  -4   8   33.80    3.70
   3   4  -8   30.50    5.80
  -3   4   8   38.50    3.20
   3  -4   8   34.80    4.00
  -3  -4  -8   45.10    3.30
   3  -4   8   36.50    3.50
   3   4   8   39.60    5.20
   3   4   8   35.60    3.30
   3   4   8   35.00    4.00
   3   4   8   41.50    3.80
   3  -4  -8   32.40    2.80
  -3   4  -8   37.40    4.60
   3  -4  -8   35.10    8.90
   4   4  -8   59.49    5.00
  -4   4   8   64.69    4.70
  -4  -4  -8   61.19    4.80
   4  -4   8   62.19    5.10
   4  -4   8   68.69    6.90
   4   4  -8   47.60   11.20
   4   4  -8   61.89    5.00
   4  -4   8   58.99    5.40
   4   4   8   51.49    7.50
   4  -4  -8   61.39   11.50
  -4   4  -8   63.99    6.40
   4   4   8   65.89    9.30
   4   4   8   68.39    5.60
   4   4   8   66.09    5.10
  -4  -4   8   64.69    4.50
   4   4   8   66.59    5.00
   4   4   8   64.69    6.50
   5   4  -8  162.48   19.90
   5  -4   8  194.68   13.20
   5   4  -8  199.48   11.60
   5  -4   8  202.48   12.30
   5   4  -8  181.08   11.50
   5  -4   8  177.88   12.10
  -5   4  -8  209.98   13.70
   5   4   8  206.38   11.90
   5  -4  -8  205.18   20.40
   5   4   8  187.68   13.10
   5   4   8  193.18   14.30
  -5  -4   8  195.48   10.80
   5   4   8  211.38   11.60
   5  -4  -8  182.58   10.60
   6   4  -8    5.20    1.50
   6  -4   8    7.00    2.20
   6  -4   8    2.10    1.20
  -6   4  -8    4.70    3.20
   6  -4  -8    3.10    1.00
  -6  -4   8    8.30    1.60
   6   4   8    4.60    1.40
   6   4   8    4.60    2.00
   6   4   8    3.90    1.50
   7   4  -8   60.89    4.30
   7   4  -8   60.89    5.40
   7  -4   8   62.09    5.10
   7  -4   8   62.09    5.60
   7  -4  -8   58.39    3.70
   7   4   8   68.59    5.50
   7   4   8   60.19    5.50
   7   4   8   53.29    4.40
  -7  -4   8   48.60    3.80
   8   4  -8   23.80    1.80
   8  -4   8   18.40    2.20
   8   4  -8   23.20    1.80
   8  -4   8   23.50    2.40
   8   4   8   26.00    2.30
   8   4   8   23.90    2.00
   8   4   8   19.70    2.40
   0  -5   8  148.59    8.50
   0  -5  -8  147.09   20.10
   0  -5  -8  141.39    8.40
   0   5   8  138.89    9.90
   0  -5   8  145.99    8.30
   0   5  -8  151.38   18.80
   0   5  -8  146.59   12.10
   1   5  -8  277.67   19.50
   1   5  -8  272.57   26.90
  -1  -5  -8  278.97   15.00
  -1   5   8  261.37   16.10
   1  -5   8  284.77   14.70
   1  -5   8  254.37   14.90
   1  -5  -8  310.47   29.60
   1   5   8  271.07   17.00
   1  -5  -8  283.07   14.90
  -1   5  -8  321.57   19.10
  -1  -5   8  285.87   14.90
   2   5  -8  250.77   19.30
  -2  -5  -8  271.97   14.30
   2  -5   8  262.77   15.10
   2   5  -8  286.67   27.40
   2  -5   8  272.77   15.30
  -2   5   8  267.77   15.40
   2   5   8  254.47   14.60
   2  -5  -8  273.07   31.50
   2  -5  -8  263.67   13.90
  -2   5  -8  270.67   17.20
  -2  -5   8  267.47   14.10
   2   5   8  226.78   21.60
   2   5   8  255.27   15.80
   3  -5   8  321.77   19.00
   3   5  -8  314.47   18.30
   3   5  -8  360.66   32.50
  -3  -5  -8  336.57   17.60
   3  -5   8  328.67   18.80
   3   5  -8  322.47   23.60
   3  -5   8  341.57   18.10
  -3   5  -8  315.77   20.40
   3   5   8  311.17   20.50
   3  -5  -8  337.57   17.00
   3   5   8  341.47   18.20
   3   5   8  331.67   19.50
  -3  -5   8  345.27   17.60
   3  -5  -8  348.87   31.70
   3   5   8  343.07   18.10
   4  -5   8  191.48   12.70
   4  -5   8  189.48   11.60
  -4  -5  -8  193.08   10.80
   4   5  -8  193.98   11.30
   4  -5   8  186.08   12.10
   4   5  -8  182.18   11.50
  -4  -5   8  189.18   10.70
   4   5   8  177.28   13.90
   4   5   8  192.58   11.60
   4  -5  -8  202.18   11.70
   4   5   8  191.48   11.30
  -4   5  -8  208.78   14.00
   4   5   8  174.78   12.60
   5   5  -8  495.05   41.00
   5   5  -8  578.74   30.40
   5  -5   8  595.44   32.20
   5   5  -8  626.64   30.10
   5  -5   8  594.74   31.30
   5  -5  -8  561.74   41.10
  -5   5  -8  624.14   33.20
   5   5   8  585.74   32.00
  -5  -5   8  574.14   29.40
   5   5   8  619.34   30.10
   5   5   8  574.54   30.50
   5   5   8  597.54   33.80
   6  -5   8  319.07   18.20
   6   5  -8  335.47   16.80
   6   5  -8  305.57   17.00
  -6   5  -8  292.97   20.40
   6   5   8  318.77   17.50
  -6  -5   8  310.17   16.30
   6   5   8  312.97   19.10
   6   5   8  322.97   16.80
   7   5  -8  102.99    5.90
   7  -5   8   91.99    7.00
   7  -5   8   98.89    6.90
   7   5   8   93.59    6.20
   7   5   8  101.79    7.00
  -7  -5   8   94.79    5.60
   0   6   8  443.66   24.60
   0  -6   8  446.26   22.20
   0   6  -8  400.26   26.90
   0   6  -8  450.35   40.20
   0  -6   8  429.06   22.50
   0  -6  -8  440.16   22.30
   1  -6   8  166.68    9.30
   1   6  -8  192.58   23.30
   1  -6   8  157.98    9.80
   1   6  -8  156.08   14.30
  -1  -6  -8  164.58    9.70
   1  -6  -8  165.38    9.50
   1   6   8  163.58   12.00
   1  -6  -8  161.38   23.20
  -1   6  -8  193.78   14.90
  -1  -6   8  162.38    9.60
   2   6  -8   22.70    5.30
  -2   6   8   21.80    3.80
   2  -6   8   24.30    3.40
   2  -6   8   24.30    2.90
  -2  -6  -8   29.60    2.70
   2   6   8   24.70    3.40
   2   6   8   23.50    3.00
  -2   6  -8   27.60    4.60
   2  -6  -8   26.00   10.30
   2   6   8   22.30    4.20
   2  -6  -8   22.90    2.30
  -2  -6   8   26.40    2.50
   3   6  -8   10.80   11.20
  -3  -6  -8   18.70    2.20
   3  -6   8   20.10    3.10
   3   6  -8   23.30    2.60
  -3   6   8   19.00    4.00
   3  -6   8   17.10    3.00
   3  -6   8   25.40    3.20
   3   6  -8   16.80    2.50
   3   6  -8   18.50    5.20
  -3   6  -8   17.50    3.90
  -3  -6   8   19.30    2.30
   3   6   8   22.30    3.30
   3   6   8   18.60    4.40
   3   6   8   19.50    2.70
   3   6   8   22.10    2.60
   3  -6  -8   19.00    1.90
  -4  -6  -8  423.96   21.30
   4  -6   8  401.56   22.80
   4   6  -8  376.66   22.00
   4  -6   8  393.06   22.30
   4  -6   8  390.66   23.20
   4   6  -8  431.26   21.50
   4   6  -8  400.36   36.30
   4   6   8  426.36   25.40
  -4  -6   8  417.66   21.30
   4   6   8  408.76   23.50
   4   6   8  430.76   21.90
   4  -6  -8  434.86   36.40
  -4   6  -8  404.16   24.90
   4  -6  -8  446.36   22.40
   4   6   8  395.26   22.40
   5  -6   8  229.58   14.30
  -5  -6  -8  243.78   12.90
   5   6  -8  252.97   13.10
   5   6  -8  213.98   13.60
   5  -6   8  233.38   15.10
   5   6   8  260.87   14.50
  -5   6  -8  254.27   16.60
   5   6   8  233.38   14.90
   5   6   8  242.48   13.40
  -5  -6   8  251.47   13.10
   6  -6   8  120.19    8.50
   6  -6   8  117.69    8.00
   6   6  -8  124.39    8.60
   6   6  -8  129.99    7.20
   6   6   8  113.29    8.20
  -6  -6   8  113.99    6.80
   6   6   8  123.29    7.90
   6   6   8  118.89    7.00
   7   6  -8  144.99    7.50
   7  -6   8  145.49    8.60
   7  -6   8  134.79    8.30
  -7  -6   8  121.49    7.50
   7   6   8  150.08    8.10
   0  -7   8  934.61   44.30
   0  -7  -8  903.21   43.80
   0   7   8  874.51   46.70
   0   7  -8  832.82   49.60
   1  -7   8   33.00    2.70
   1   7  -8   44.10   19.90
  -1   7   8   30.70    5.20
   1   7  -8   35.00    6.30
  -1  -7  -8   35.30    3.00
   1  -7   8   30.80    3.60
   1  -7   8   36.60    3.30
   1  -7  -8   31.70    2.90
   1   7   8   28.90    3.70
  -1  -7   8   32.90    2.90
  -1   7  -8   31.50    5.50
   1   7   8   24.00    4.90
   2  -7   8  679.73   36.30
   2   7  -8  705.23   55.89
   2  -7   8  713.33   36.20
  -2  -7  -8  714.43   35.30
   2   7  -8  616.44   43.90
  -2   7   8  772.62   40.10
   2   7   8  728.03   35.80
   2   7   8  694.43   39.60
  -2  -7   8  681.93   35.10
   2  -7  -8  787.42   57.99
  -2   7  -8  707.53   42.70
   2  -7  -8  697.33   34.80
   2   7   8  679.23   36.80
   3   7  -8  185.28   24.60
   3  -7   8  191.08   11.80
   3   7  -8  171.28   16.20
   3  -7   8  182.78   12.10
  -3  -7  -8  193.48   10.70
   3   7  -8  175.98   12.00
   3   7   8  188.98   11.60
   3  -7  -8  181.38   14.20
  -3   7  -8  174.78   14.10
  -3  -7   8  196.88   10.70
   3  -7  -8  206.68   25.70
   3   7   8  200.58   12.80
   3   7   8  187.78   12.90
   4  -7   8   29.40    3.70
   4  -7   8   27.00    3.30
  -4   7   8   22.40    4.50
   4   7  -8   27.90    3.10
   4   7   8   29.10    3.00
  -4   7  -8   30.10    4.90
   4   7   8   28.30    3.40
  -4  -7   8   30.50    2.70
   4  -7  -8   32.10    3.20
   4   7   8   25.10    3.10
  -5  -7  -8   23.90    2.10
   5  -7   8   25.50    3.20
   5   7  -8   17.70    2.30
   5  -7   8   22.40    2.70
   5   7   8   21.80    2.70
  -5  -7   8   19.60    2.00
   5   7   8   24.80    2.50
   5   7   8   22.00    2.70
   6   7  -8   54.19    3.70
   6  -7   8   52.19    4.20
   6  -7   8   53.89    4.10
   6   7   8   52.19    4.00
   6   7   8   54.99    4.10
  -6  -7   8   55.19    3.40
   0  -8  -8  775.02   39.30
   0   8   8  774.62   39.30
   0  -8   8  776.12   37.90
   0   8  -8  761.92   46.00
   1  -8   8  135.09    7.40
   1  -8   8  135.19    8.70
   1   8  -8  132.19   12.90
  -1  -8  -8  136.99    8.00
   1   8   8  132.79    8.30
   1  -8  -8  127.99    7.70
  -1   8  -8  125.19   12.00
   1   8   8  132.29    8.80
  -1  -8   8  136.29    7.90
  -2  -8  -8   85.89    5.70
   2  -8   8   87.69    6.60
   2   8  -8   81.59    6.30
   2   8  -8   85.69   10.30
   2   8   8   99.19    6.80
   2   8   8   96.79    6.20
   2  -8  -8   87.49    5.30
   2   8   8   90.29    6.60
  -2   8  -8   86.39    9.20
  -2  -8   8   84.59    5.60
   3  -8   8   72.39    6.00
   3  -8   8   70.89    5.70
   3   8  -8   75.09    5.60
  -3  -8  -8   80.29    5.10
  -3  -8   8   69.89    4.90
   3  -8  -8   80.89    5.70
   3   8   8   78.29    5.30
  -3   8  -8   63.29    7.80
   3   8   8   81.49    6.10
   3   8   8   71.99    5.70
   4  -8   8  102.89    7.70
   4  -8   8  110.49    7.50
   4   8   8  122.89    7.30
   4  -8  -8  116.59    7.10
  -4  -8   8  111.19    6.60
   4   8   8  124.19    8.00
   4   8   8  106.19    7.20
   5   8  -8  242.48   13.00
  -5  -8  -8  248.78   12.80
   5  -8   8  245.68   13.40
   5  -8   8  235.58   13.60
   5   8   8  241.78   12.90
  -5  -8   8  258.67   12.70
   5   8   8  251.37   13.50
   0  -9  -8   17.20    1.70
   0  -9   8   17.20    2.00
   0  -9   8   16.10    1.50
   0   9   8   13.70    2.10
   0   9  -8   13.50    4.90
  -1  -9  -8  124.59    7.00
   1  -9   8  121.79    8.00
   1   9   8  116.19    7.60
   1  -9  -8  121.59    6.70
  -1  -9   8  101.69    7.90
  -1   9  -8  101.79   10.80
   1   9   8  127.89    7.20
  -1  -9   8  122.79    6.80
   2  -9   8    1.50    0.90
   2  -9   8    0.80    0.90
  -2  -9  -8    1.00    0.60
   2  -9  -8    1.50    0.80
  -2  -9   8    1.70    0.60
   2   9   8    2.50    1.40
   2   9   8    2.80    1.10
  -3  -9  -8  118.89    6.60
   3  -9   8  115.49    7.10
   3  -9   8  101.49    7.30
   3   9  -8  114.69    7.00
   3   9   8  124.39    7.40
  -3  -9   8  112.09    6.50
   3  -9  -8  110.79    6.90
   4   9  -8   15.90    2.10
   4  -9   8   11.60    1.60
   4  -9   8   12.50    1.60
  -4  -9  -8   14.30    1.30
  -4  -9   8   13.90    1.40
   4   9   8   13.30    1.60
   0 -10  -8  163.28    8.80
   0  10   8  162.58    9.00
   1 -10   8  176.58    9.40
  -1 -10  -8  161.28    8.40
   1  10  -8  174.78    8.90
   1 -10   8  142.19    8.50
   1  10   8  153.88    8.80
   1 -10  -8  145.99    8.00
  -1 -10   8  159.78    8.40
   2 -10   8   12.80    1.60
   2 -10   8   15.20    1.80
  -2 -10  -8   16.80    1.40
   2  10  -8   16.90    1.60
  -2 -10   8   14.70    1.20
   2 -10  -8   15.10    1.50
   2  10   8   16.20    1.70
   0   0   9    0.00    0.30
   0   0  -9    1.60    2.60
   0   0  -9    1.00    1.00
  -1   0   9  190.68    9.40
   1   0   9  202.68   10.50
   1   0   9  182.38    9.80
   1   0  -9  169.28   17.80
  -1   0  -9  161.88   17.80
  -1   0  -9  186.98   11.40
  -2   0  -9    5.50    1.60
  -2   0   9    2.90    0.60
   2   0   9    2.60    1.00
   2   0   9    7.90    4.30
   2   0  -9   -0.70    2.70
  -3   0   9 2967.50  140.89
   3   0   9 3009.60  142.79
   3   0  -9 2967.60  156.38
   4   0   9  181.18   10.90
   4   0  -9  173.08   19.30
   4   0   9  200.28   12.50
   4   0   9  180.38   11.50
   4   0  -9  168.88   10.50
  -4   0   9  157.48    9.70
   4   0   9  175.98   10.70
   5   0   9  821.22   44.50
  -5   0   9  842.52   41.50
   5   0   9  844.92   44.60
   5   0   9  912.91   43.70
   5   0   9  778.62   46.30
   5   0  -9  785.32   41.30
   5   0  -9  830.02   43.00
   5   0   9  892.01   43.00
   5   0   9  884.51   41.40
   5   0  -9  734.43   60.89
   5   0   9  921.91   41.90
  -6   0   9  487.15   24.70
   6   0  -9  459.25   25.40
   6   0  -9  477.15   24.40
   6   0   9  485.95   26.30
   6   0   9  500.75   24.90
   6   0   9  464.45   26.70
   6   0   9  477.65   27.50
   6   0   9  522.65   24.60
   6   0   9  494.15   26.50
  -7   0   9   12.70    2.10
   7   0   9    9.20    2.60
   7   0   9   10.70    2.10
   7   0   9   10.90    1.70
   7   0  -9   16.40    1.70
   7   0   9   14.70    2.40
   7   0  -9   13.40    2.00
   8   0  -9   42.70    4.30
   8   0   9   51.39    3.90
   0   1   9  547.35   25.80
   0  -1  -9  483.85   36.10
   0   1  -9  550.14   28.80
   0   1  -9  504.45   36.30
   0  -1   9  539.55   25.90
   1   1  -9 1225.98   72.19
   1  -1   9 1206.38   60.19
   1  -1   9 1426.66   60.69
   1   1  -9 1309.57   63.99
  -1  -1  -9 1053.69   71.19
  -1   1   9 1285.47   59.69
  -1  -1   9 1285.47   59.89
  -1   1  -9 1344.87   62.49
  -1   1  -9 1087.99   71.29
   1  -1  -9 1167.28   71.69
   1   1   9 1255.37   61.19
   1   1   9 1329.17   60.29
   2   1  -9  568.04   42.20
   2  -1   9  670.33   32.10
   2  -1   9  706.73   32.40
   2   1   9  699.93   41.30
  -2   1  -9  661.43   33.30
   2   1   9  595.34   31.90
   2   1   9  675.03   33.30
   2  -1  -9  565.44   42.00
   3   1  -9  257.07   24.90
   3  -1   9  288.27   16.00
   3  -1   9  317.47   16.10
  -3   1  -9  310.67   16.50
  -3  -1   9  292.07   14.60
   3   1   9  291.47   17.00
   3   1   9  269.87   15.80
   3  -1  -9  261.47   24.80
   3   1   9  338.37   22.00
   4  -1   9  113.59    8.30
   4  -1   9  115.09    7.60
   4  -1   9  118.09    7.90
   4  -1   9  106.59    7.60
   4  -1   9  111.79    7.60
   4   1  -9   96.99   14.80
   4   1   9  124.39    7.90
   4  -1  -9   96.99    7.00
   4  -1  -9  102.99   14.50
  -4  -1   9   96.49    7.80
   4   1   9  117.29    8.60
  -4   1  -9  128.49    8.80
   4   1   9  110.99    7.00
   4   1   9  110.89    8.20
   4   1   9  129.19    8.50
   4   1   9  106.69    7.50
   5  -1   9  286.37   15.90
   5  -1   9  244.98   16.90
   5  -1   9  294.97   14.20
   5  -1   9  247.38   17.90
   5   1  -9  258.97   15.40
  -5   1   9  280.47   14.50
   5  -1   9  295.67   14.40
   5   1  -9  247.48   14.40
   5   1   9  265.27   17.10
   5   1   9  268.07   14.30
   5   1   9  217.48   19.10
   5   1   9  287.67   16.90
   5   1   9  246.48   16.20
  -5  -1   9  272.77   14.40
   5  -1  -9  274.87   14.30
   5   1   9  275.87   14.80
   6  -1   9   49.50    4.70
   6   1  -9   44.60    3.80
   6  -1   9   52.89    4.70
   6   1  -9   46.80    4.30
  -6   1   9   49.50    3.80
   6  -1   9   43.70    5.50
   6  -1   9   49.90    3.80
   6  -1   9   48.90    5.50
   6   1   9   50.69    4.10
   6   1   9   52.39    3.80
   6   1   9   44.70    6.10
   6   1   9   47.60    5.50
  -6  -1   9   49.50    3.80
   6   1   9   54.79    5.50
   6   1   9   48.90    5.10
   6  -1  -9   46.60    4.10
   6   1   9   46.40    4.60
  -7   1   9  144.19    8.30
   7  -1   9  144.49    9.00
   7  -1   9  123.39    9.30
   7  -1   9  133.49    8.00
   7  -1   9  154.78   11.30
   7   1  -9  148.49    8.10
   7   1  -9  131.49    8.70
  -7  -1   9  145.79    8.20
   7   1   9  148.09   10.70
   7  -1  -9  133.99    8.60
   7   1   9  136.59    8.30
   7   1   9  153.18    9.90
   7   1   9  138.79    9.70
   7   1   9  151.98    8.10
   8   1  -9  186.38   10.80
   8  -1   9  176.68   12.10
   8  -1   9  201.08   11.50
   8   1   9  194.38   12.20
   8   1   9  194.08   10.20
   8  -1  -9  183.88   10.30
   8   1   9  199.88   11.20
   0   2   9   82.09    4.60
   0   2  -9   67.29   11.00
   0  -2   9   75.19    4.60
   0  -2  -9   79.09   11.60
   0   2  -9   75.49    6.80
  -1  -2  -9  655.13   47.40
   1   2  -9  708.83   39.10
   1  -2   9  715.13   35.30
   1   2  -9  750.32   47.60
  -1   2   9  750.12   34.50
   1   2   9  734.03   36.80
   1   2   9  765.32   35.40
  -1   2  -9  796.12   37.80
  -1   2  -9  631.24   46.20
   1  -2  -9  693.13   47.10
  -1  -2   9  691.63   34.90
   2  -2   9 1005.60   43.50
   2   2  -9  871.81   48.60
   2  -2   9  878.01   44.10
   2   2  -9  864.01   56.29
   2  -2  -9  864.51   56.29
   2   2   9  832.82   45.30
   2   2   9  899.51   44.10
   2   2   9  942.11   56.49
  -2   2  -9  898.71   45.50
   3   2  -9  137.89   17.20
  -3   2   9  150.08    8.50
   3  -2   9  146.19    9.80
   3  -2   9  151.48    9.10
   3   2   9  143.69   10.00
   3   2   9  141.49   10.40
   3   2   9  171.48   15.50
   3   2   9  154.48    9.30
  -3  -2   9  143.79    8.50
   3  -2  -9  152.68   17.70
  -3   2  -9  163.78   10.10
  -4   2   9   16.50    2.00
   4  -2   9   15.90    2.90
   4   2  -9   20.00    7.80
   4  -2   9   17.40    2.60
   4   2  -9   18.30    2.60
   4  -2   9   16.00    2.50
   4  -2  -9   20.60    2.30
   4  -2  -9   20.70    7.50
   4   2   9   21.10    2.30
   4   2   9   24.50    3.30
  -4   2  -9   23.00    3.30
   4   2   9   20.50    3.00
   4   2   9   19.20    2.50
   4   2   9   18.40    3.00
   4   2   9   26.00    3.90
  -4  -2   9   16.80    1.90
   4   2   9   21.20    3.00
   5  -2   9  182.58   12.20
   5   2  -9  146.49   18.30
   5   2  -9  166.38   10.60
   5  -2   9  194.88    9.80
   5   2  -9  162.58   10.10
   5  -2   9  168.88   11.10
   5  -2   9  192.18   10.90
   5  -2   9  179.58   11.30
   5   2   9  186.68   11.10
   5   2   9  176.08   10.00
   5  -2  -9  169.98   18.60
   5   2   9  169.68   12.50
   5   2   9  169.68   11.90
   5   2   9  167.18   11.30
   5   2   9  186.98   12.10
  -5  -2   9  141.09   10.30
   5   2   9  177.48   10.40
   5  -2  -9  169.18   10.20
   6   2  -9    8.50    2.00
   6  -2   9    9.30    2.00
   6  -2   9    7.30    1.80
   6  -2   9    6.50    2.20
  -6   2   9   11.10    1.90
   6  -2   9    5.90    2.70
  -6  -2   9   10.10    1.50
   6  -2  -9    5.40    3.00
   6   2   9    7.80    2.00
   6   2   9   11.50    2.40
   6   2   9    8.90    1.70
   6  -2  -9   13.20    3.80
   6   2   9   14.30    2.50
   6   2   9    4.50    3.50
   6   2   9    6.60    2.40
   7  -2   9  180.88   10.00
   7  -2   9  156.88   10.80
   7   2  -9  169.18   10.40
   7  -2   9  169.28   12.10
   7   2  -9  190.78    9.80
   7   2   9  151.48   11.20
   7   2   9  193.08    9.70
   7   2   9  176.08   11.70
   7   2   9  175.88   10.10
   7  -2  -9  173.88    9.90
   8   2  -9  324.07   16.70
   8  -2   9  322.37   18.30
   8  -2  -9  323.87   16.40
   0  -3  -9  350.76   30.00
   0   3   9  370.16   17.80
   0   3  -9  314.07   22.70
   0  -3   9  372.96   18.00
   0   3  -9  349.17   28.80
   1  -3   9  915.01   46.70
   1   3  -9  936.81   59.69
   1   3  -9 1010.50   51.69
  -1   3  -9 1013.00   51.79
   1  -3  -9  994.90   61.29
   1   3   9  977.30   46.80
  -1   3  -9  867.71   59.69
   1   3   9  954.00   48.80
   2   3  -9  119.09   11.10
   2  -3   9  124.79    7.80
  -2   3   9  126.59    7.50
   2   3  -9  130.99   16.60
   2  -3  -9  140.09   17.20
   2   3   9  128.99    9.40
   2   3   9  125.99    7.90
  -2   3  -9  140.69    9.50
  -2  -3   9  122.89    7.30
   3  -3   9   42.60    3.90
   3  -3   9   38.40    3.50
  -3   3   9   41.00    3.20
   3   3  -9   39.60    9.60
   3  -3   9   37.60    3.90
   3   3   9   34.80    4.50
   3   3   9   35.50    4.10
   3   3   9   36.60    3.80
  -3  -3   9   36.30    3.00
   3  -3  -9   35.10    2.90
   3   3   9   46.50    5.30
   3  -3  -9   46.10    9.90
   3   3   9   39.40    3.70
  -3   3  -9   38.20    4.40
   4  -3   9   76.09    5.70
   4  -3   9   72.69    6.00
  -4   3   9   68.09    5.00
   4  -3   9   70.09    6.20
   4   3  -9   68.99    5.30
   4   3  -9   60.59   12.80
   4   3   9   70.79    5.80
   4   3   9   74.99    6.70
   4   3   9   76.49    6.20
   4  -3  -9   66.79   12.20
   4  -3  -9   61.29    4.80
  -4   3  -9   67.69    6.40
   4   3   9   83.39    7.60
   4   3   9   81.79    5.60
  -4  -3   9   68.29    4.80
   4   3   9   72.79    5.30
   5   3  -9  308.77   17.30
   5  -3   9  308.57   18.00
  -5   3   9  325.07   16.80
   5   3  -9  298.17   16.90
   5  -3   9  308.77   17.90
   5  -3   9  313.67   18.90
  -5   3  -9  330.37   19.10
  -5  -3   9  310.47   16.40
   5   3   9  315.27   16.70
   5   3   9  315.47   18.90
   5   3   9  309.87   17.20
   5   3   9  287.47   17.80
   5  -3  -9  303.67   16.50
   5   3   9  303.37   19.80
   6  -3   9  369.96   21.90
  -6   3   9  410.86   20.70
   6   3  -9  390.66   21.40
   6  -3   9  446.96   24.60
   6   3  -9  384.76   21.10
  -6  -3   9  380.76   20.50
   6   3   9  380.66   22.90
   6   3   9  420.46   23.60
   6   3   9  399.96   20.90
   6   3   9  395.26   21.70
   7   3  -9   47.80    4.00
   7  -3   9   48.40    4.50
   7  -3   9   50.59    5.40
   7  -3  -9   55.09    3.60
   7   3   9   47.90    3.80
  -7  -3   9   46.70    3.40
   7   3   9   49.80    5.10
   8  -3   9  215.68   12.70
   8  -3   9  218.18   12.00
   8   3  -9  229.88   11.50
   8  -3  -9  219.58   10.90
   8   3   9  201.98   12.10
   8   3   9  211.58   11.40
   0  -4  -9    8.20    6.50
   0  -4   9    0.50    0.60
   0  -4   9    1.20    0.80
   0   4  -9    0.30    1.40
   0  -4  -9    2.10    0.90
  -1  -4  -9  131.39    8.10
   1   4  -9  142.89   17.90
  -1   4   9  132.09    8.00
   1   4  -9  160.58   14.10
  -1   4   9  132.49    9.20
   1  -4   9  138.89    8.10
   1  -4  -9  125.49    7.90
   1   4   9  147.89   10.10
   1  -4  -9  139.79   18.50
  -1   4  -9  142.49   10.80
  -1  -4   9  127.69    7.90
  -2  -4  -9  171.68   10.50
  -2   4   9  181.68   10.30
   2  -4   9  169.58   10.90
   2  -4   9  177.98   10.50
   2   4  -9  208.08   21.80
   2   4  -9  166.08   14.60
   2  -4  -9  173.28   10.00
  -2  -4   9  190.28   10.20
  -2   4  -9  206.28   13.00
   2  -4  -9  187.48   21.90
   2   4   9  185.48   12.70
   3   4  -9  885.41   44.20
   3   4  -9  952.10   61.69
  -3   4   9  951.80   44.30
   3   4  -9  792.32   44.50
   3   4  -9  836.62   50.89
   3  -4   9  902.91   45.30
   3  -4   9  825.52   45.60
   3  -4   9  885.41   44.60
  -3  -4  -9  864.21   44.20
   3   4   9  953.70   44.70
   3  -4  -9  890.71   43.60
   3  -4  -9 1027.20   62.39
  -3  -4   9  915.91   44.00
   3   4   9  888.61   46.30
   4   4  -9  809.52   41.60
  -4  -4  -9  751.92   40.60
   4  -4   9  806.52   42.90
   4  -4   9  838.62   42.20
  -4   4   9  846.22   40.90
   4  -4   9  819.12   41.70
   4   4  -9  805.52   56.99
   4   4  -9  819.82   41.40
   4   4   9  950.90   49.30
   4   4   9  853.61   41.10
  -4  -4   9  836.42   40.60
   4   4   9  809.22   43.20
   4   4   9  791.52   44.40
  -4   4  -9  698.93   49.20
   4   4   9  828.12   41.50
   4  -4  -9  895.91   57.19
   5   4  -9   98.19    7.00
   5  -4   9  104.39    8.70
   5   4  -9  112.69    7.40
   5  -4   9  101.99    7.80
   5  -4   9   97.69    8.00
   5   4  -9   88.99   14.80
  -5  -4   9  100.09    6.50
   5   4   9  105.29    8.70
   5  -4  -9  116.79   15.70
   5   4   9  114.39    7.50
   5   4   9  104.69    6.90
  -5   4  -9  112.69    9.20
   5   4   9  104.69    9.70
   5  -4  -9  107.69    6.40
   6   4  -9   67.89    5.10
   6  -4   9   66.69    5.80
   6  -4   9   76.89    6.90
   6   4  -9   77.79    5.50
   6   4   9   78.49    5.10
   6   4   9   73.39    5.50
  -6  -4   9   69.99    4.90
   6   4   9   65.59    6.60
   6  -4  -9   73.29    4.60
   7  -4   9  174.28   11.50
   7  -4   9  165.58   10.50
   7   4  -9  177.28    9.50
   7   4  -9  210.28   12.30
  -7  -4   9  169.98    9.80
   7   4   9  184.68    9.40
   7   4   9  159.98    9.80
   7  -4  -9  178.48    9.10
   7   4   9  160.58   11.30
   8  -4   9   40.50    3.00
   8   4  -9   41.30    2.50
   8  -4   9   31.00    3.40
   8   4   9   35.90    2.60
   0  -5  -9 1194.68   78.59
   0  -5  -9 1157.78   57.89
   0   5  -9 1149.98   75.79
   0   5  -9 1278.27   64.59
   0  -5   9 1235.18   57.69
   0  -5   9 1124.19   57.99
   0   5   9 1179.88   60.19
   1  -5   9  401.46   23.20
   1   5  -9  412.46   27.70
  -1   5   9  439.56   24.20
   1  -5   9  439.66   22.10
   1   5  -9  468.85   38.80
  -1  -5  -9  448.56   22.70
   1  -5  -9  445.36   22.60
   1   5   9  432.96   25.50
  -1   5  -9  434.46   26.70
   1  -5  -9  486.75   40.70
  -1  -5   9  454.05   22.40
   2   5  -9  252.67   20.30
  -2  -5  -9  276.87   14.70
   2  -5   9  262.97   15.40
   2  -5   9  268.47   15.00
  -2   5   9  269.57   15.90
   2   5  -9  270.17   28.10
   2   5   9  274.67   16.50
   2  -5  -9  274.17   14.40
   2  -5  -9  290.57   29.40
   2   5   9  271.57   17.50
  -2  -5   9  270.87   14.50
  -2   5  -9  268.67   17.70
   3  -5   9  156.88   11.00
   3  -5   9  155.38   11.10
   3   5  -9  156.28   10.20
   3   5  -9  146.29   14.60
   3   5  -9  165.38   24.60
  -3  -5  -9  174.88   10.30
   3  -5   9  160.28   10.20
   3   5   9  173.68   10.10
  -3   5  -9  181.18   12.70
  -3  -5   9  174.98    9.60
   3   5   9  162.58   11.40
   3   5   9  167.08   12.60
   3  -5  -9  161.68    9.10
   3   5   9  168.58   10.20
   4   5  -9  199.98   11.80
   4  -5   9  199.58   13.30
  -4  -5  -9  206.28   11.20
   4   5  -9  188.88   11.80
   4  -5   9  196.28   12.20
   4  -5   9  191.38   12.40
   4   5  -9  181.68   23.00
   4  -5  -9  203.48   23.20
  -4   5  -9  201.58   14.20
   4   5   9  198.68   12.00
  -4  -5   9  198.08   11.20
   4   5   9  206.48   15.00
   4   5   9  192.08   13.20
   4   5   9  212.28   11.60
   5   5  -9  110.39    7.30
  -5  -5  -9  115.69    6.70
   5  -5   9   88.99   10.30
   5   5  -9   81.89   21.40
   5  -5   9   87.29    9.80
   5   5  -9  121.19    7.70
  -5  -5   9  109.09    6.90
   5   5   9   96.99    8.90
  -5   5  -9  116.99    9.80
   5   5   9  120.59   10.30
   5   5   9  112.89    7.00
   6  -5   9  322.27   18.40
   6   5  -9  351.46   17.40
   6  -5   9  318.67   19.00
   6   5  -9  327.87   17.30
  -6  -5   9  321.07   16.90
   6   5   9  329.47   17.90
   7   5  -9  147.19    7.50
   7  -5   9  135.29    8.30
   7  -5   9  123.19    8.70
   7   5  -9  150.48    8.10
  -7  -5   9  131.99    7.40
   7   5   9  146.69    9.00
   7   5   9  130.49    7.90
   0   6  -9  248.78   19.50
   0  -6   9  293.87   15.10
   0   6   9  292.37   21.80
   0  -6  -9  290.87   15.20
   1  -6   9  900.21   45.70
   1  -6   9  861.51   45.10
  -1  -6  -9  912.71   44.90
   1   6  -9  927.11   65.89
   1  -6  -9  916.31   44.80
  -1   6  -9  924.71   50.39
   1   6   9  893.91   48.10
   1  -6  -9  959.60   67.89
  -1  -6   9  903.31   44.70
   2  -6   9  120.59    8.10
   2  -6   9  124.39    8.50
   2   6  -9  113.69   12.40
   2   6  -9  126.29   19.80
  -2   6   9  123.49    9.40
  -2  -6  -9  128.39    7.80
  -2  -6   9  123.89    7.60
   2   6   9  127.19    9.30
   2   6   9  125.89   10.50
   2  -6  -9  127.29    7.40
  -2   6  -9  125.69   11.10
   2  -6  -9  128.79   20.90
   3  -6   9  363.66   20.20
  -3   6   9  351.76   21.30
   3  -6   9  379.06   21.50
   3   6  -9  395.16   20.00
   3   6  -9  340.07   19.10
   3  -6   9  381.36   20.80
  -3  -6  -9  402.26   19.70
   3   6  -9  369.16   35.70
   3   6  -9  330.77   25.70
   3   6  -9  350.06   20.10
   3   6   9  371.66   21.60
   3   6   9  346.17   22.90
   3   6   9  374.06   19.80
   3  -6  -9  422.26   20.50
   3  -6  -9  374.56   18.80
   3   6   9  393.26   20.40
  -3  -6   9  388.36   19.50
  -3   6  -9  348.17   23.00
   3  -6  -9  384.36   36.10
   4  -6   9  261.27   15.60
   4  -6   9  253.07   15.70
   4   6  -9  253.97   14.00
  -4  -6  -9  262.07   14.70
   4   6  -9  214.38   26.30
   4   6   9  255.07   14.60
   4   6   9  253.27   13.80
   4  -6  -9  257.57   27.50
  -4   6  -9  244.48   17.00
  -4  -6   9  250.67   13.60
   4   6   9  229.28   15.30
   5  -6   9  173.88   10.80
  -5  -6  -9  174.48    9.50
   5  -6   9  175.08   11.70
   5   6  -9  169.18   10.10
   5   6  -9  177.48    9.70
  -5   6  -9  172.08   13.10
   5   6   9  161.58   10.40
   5   6   9  148.09   11.00
   5   6   9  177.18    9.80
  -5  -6   9  178.08    9.70
   6   6  -9    3.20    1.00
   6   6  -9    4.20    1.40
   6  -6   9    5.90    1.80
   6  -6   9    3.00    1.50
  -6  -6   9    3.40    0.90
   6   6   9    4.20    1.20
   6   6   9    6.50    1.90
   7  -6   9   78.29    5.80
   7  -6   9   82.89    5.20
   7   6   9   85.89    5.10
   7   6   9   92.39    6.20
   0   7  -9 1023.10   57.19
   0  -7  -9 1021.30   50.59
   0   7   9 1032.10   53.99
   0  -7   9 1024.70   51.19
   0  -7   9 1057.39   51.09
  -1  -7  -9  122.79    7.40
  -1   7   9  109.19   10.00
   1  -7   9  118.99    6.80
   1  -7   9  115.69    7.80
   1  -7   9  119.49    8.00
   1   7  -9   95.39   21.10
   1   7  -9  109.29   12.80
  -1  -7   9  127.99    8.00
   1  -7  -9  119.19    7.20
   1   7   9  112.79   10.10
  -1   7  -9  108.99   11.90
  -1  -7   9  119.59    7.20
   1   7   9  112.89    8.40
   2  -7   9    9.00    2.50
   2  -7   9    9.90    1.90
  -2  -7  -9   12.50    1.70
   2   7  -9    9.40   11.30
   2   7   9   11.80    2.00
  -2  -7   9   10.20    1.60
   2  -7  -9   10.10    1.50
  -2   7  -9   10.00    3.50
   2  -7  -9   20.80   12.50
   2   7   9   11.00    2.40
   2   7   9   15.30    4.40
  -3   7   9  469.75   27.80
  -3  -7  -9  506.45   25.40
   3   7  -9  473.35   26.00
   3  -7   9  503.55   26.50
   3  -7   9  501.95   27.20
   3   7  -9  446.56   41.90
  -3   7  -9  505.15   29.90
   3  -7  -9  494.15   43.50
   3  -7  -9  551.04   26.30
   3   7   9  536.55   26.50
  -3  -7   9  441.06   25.10
   3   7   9  521.05   27.30
  -4  -7  -9  312.67   15.60
   4  -7   9  303.27   17.60
   4   7  -9  287.57   16.10
   4  -7   9  302.57   16.70
  -4  -7   9  283.27   15.50
  -4   7  -9  287.47   19.50
   4   7   9  304.37   16.70
   4   7   9  272.77   16.90
   5   7  -9   34.80    3.00
   5  -7   9   38.80    3.70
   5  -7   9   38.00    3.90
  -5  -7  -9   32.60    2.70
   5   7   9   42.00    3.70
  -5  -7   9   37.50    2.90
   5   7   9   35.20    4.30
   6  -7   9  115.29    7.50
   6  -7   9  117.19    7.10
   6   7  -9  126.49    6.50
   6   7   9  112.79    7.10
   6   7   9  125.49    7.10
  -6  -7   9  121.49    6.80
   0  -8   9   20.40    2.60
   0  -8   9   23.00    2.20
   0   8   9   23.10    2.90
   0  -8  -9   24.60    2.40
   0   8  -9   21.80    5.00
  -1  -8  -9   15.50    1.90
   1   8  -9    8.90    3.90
   1  -8   9   10.90    2.00
   1  -8   9   13.10    1.50
  -1   8  -9   17.70    4.40
   1  -8  -9   12.60    1.60
  -1  -8   9   13.90    1.70
   1   8   9   11.50    2.20
   2  -8   9  434.26   22.10
   2  -8   9  369.16   20.60
   2   8  -9  367.86   20.50
  -2  -8  -9  384.06   19.90
   2   8  -9  358.16   26.10
  -2   8  -9  369.36   24.80
   2   8   9  445.16   21.40
   2  -8  -9  383.56   19.30
   2   8   9  365.86   20.90
  -2  -8   9  381.16   19.70
   3  -8   9    3.90    1.50
  -3  -8  -9    3.90    1.00
   3   8  -9    4.50    1.30
   3  -8  -9    5.20    1.60
  -3   8  -9    3.30    3.40
  -3  -8   9    6.40    1.10
   3   8   9    6.10    1.50
  -4  -8  -9   36.30    2.70
   4   8  -9   34.40    2.90
   4  -8   9   35.20    3.20
   4  -8   9   30.90    3.80
  -4  -8   9   38.10    3.00
   4   8   9   35.70    3.30
   4   8   9   30.60    3.10
  -5  -8  -9   47.70    2.90
   5  -8   9   47.80    3.50
   5  -8   9   42.10    3.60
   5   8  -9   45.40    3.10
  -5  -8   9   43.10    3.20
   5   8   9   52.79    3.60
   5   8   9   45.10    3.20
   0  -9   9   40.40    2.80
   0  -9  -9   44.60    3.10
  -1  -9  -9   56.89    3.80
   1  -9   9   51.79    3.90
   1   9  -9   50.09    4.20
   1   9   9   58.99    4.40
   1  -9  -9   54.99    3.80
  -1  -9   9   53.09    3.50
   2  -9   9  215.48   15.00
   2  -9   9  254.07   14.00
  -2  -9  -9  257.87   13.40
   2   9  -9  260.47   13.70
  -2  -9   9  228.68   13.20
   2   9   9  265.57   14.20
   2  -9  -9  279.97   13.80
   3  -9   9   10.80    1.80
   3   9  -9   12.90    1.60
   3  -9   9   10.60    1.50
  -3  -9  -9   15.70    1.40
  -3  -9   9   11.80    1.30
   3   9   9   13.80    1.80
   3  -9  -9    9.90    1.90
  -4  -9  -9   49.20    2.90
   4  -9   9   39.80    3.00
   4  -9   9   44.60    3.70
   4   9   9   45.30    3.30
  -4  -9   9   47.80    3.00
   0  10   9   87.69    5.50
   0  10  -9   83.19    4.90
   0 -10   9   72.09    5.90
   0 -10  -9   87.19    4.70
   1  10  -9   73.89    4.40
  -1 -10  -9   75.59    4.20
   1 -10   9   75.69    4.90
   1  10   9   79.09    4.70
   1 -10  -9   71.49    4.40
  -1 -10   9   66.29    3.90
  -2 -10  -9  162.88    8.40
   2 -10   9  149.99    8.70
   2  10  -9  145.19    8.50
   2  10   9  167.68    8.70
  -2 -10   9  152.38    7.90
   0   0  10 5755.62  263.97
   0   0 -10 5389.66  278.97
   1   0  10 1146.99   54.29
   1   0  10 1112.09   53.49
   1   0 -10 1014.60   66.09
  -1   0  10 1131.79   52.99
  -1   0 -10 1112.79   55.49
  -2   0 -10 2180.68  114.39
   2   0  10 2725.73  126.29
   2   0 -10 2071.19  126.59
   2   0  10 2613.84  114.69
  -2   0  10 2303.97  112.49
   2   0  10 2340.07  113.59
  -3   0  10   47.90    3.50
   3   0  10   52.89    4.60
   3   0 -10   35.30    9.30
   3   0  10   40.30    3.80
   4   0  10 1516.65   71.59
   4   0  10 1464.45   72.49
   4   0  10 1564.94   73.49
   4   0  10 1582.54   73.49
   4   0 -10 1303.47   85.59
   4   0  10 1459.65   73.49
  -4   0  10 1455.45   71.49
   5   0 -10   20.60    2.70
  -5   0  10   21.70    2.70
   5   0  10   29.40    3.50
   5   0  10   23.90    2.70
   5   0  10   31.10    3.40
   5   0 -10   28.40    8.70
   5   0  10   21.40    4.00
   5   0  10   25.80    3.60
   5   0  10   27.10    2.50
   5   0  10   27.80    3.70
   6   0  10 1045.10   57.09
   6   0  10 1274.77   54.69
   6   0  10 1215.48   55.09
   6   0 -10 1054.69   58.99
   6   0 -10 1115.39   55.89
   6   0  10 1182.48   56.89
   6   0 -10  999.10   57.89
  -6   0  10 1140.79   55.09
   6   0  10 1117.99   57.89
  -7   0  10 1081.79   50.39
   7   0 -10 1006.00   50.79
   7   0  10 1018.40   53.29
   7   0  10 1013.90   51.39
   8   0  10    8.30    1.60
   8   0  10   13.20    1.90
   8   0  10    8.80    1.80
   8   0 -10   11.10    1.50
   0   1 -10  244.48   23.70
   0   1 -10  266.67   16.40
   0  -1 -10  233.38   23.40
   0   1  10  254.97   13.20
   0  -1  10  275.17   13.30
   1  -1  10 1695.23   79.39
  -1   1  10 1721.73   78.69
   1   1 -10 1699.63   83.39
   1   1 -10 1531.55   92.69
  -1   1 -10 1690.03   81.89
  -1  -1  10 1723.63   78.99
   1   1  10 1785.72   79.39
  -1   1 -10 1407.96   92.49
   1  -1 -10 1587.04   93.19
   2  -1  10  710.73   32.20
   2  -1  10  646.74   31.80
   2   1 -10  563.14   43.20
  -2  -1  10  637.84   30.80
  -2   1 -10  630.64   33.30
   2   1  10  651.73   31.80
   2   1  10  628.44   33.00
   2  -1 -10  589.64   43.70
   3   1 -10  209.08   23.20
   3  -1  10  253.37   13.80
  -3   1  10  236.68   12.90
   3  -1  10  267.67   13.90
   3  -1  10  243.48   14.40
  -3   1 -10  241.98   14.40
   3  -1 -10  219.48   23.30
   3   1  10  252.47   15.00
   3   1  10  256.17   14.50
  -3  -1  10  227.78   12.90
  -3  -1  10  246.38   12.30
   3   1  10  240.08   13.70
   4  -1  10   65.39    5.80
   4  -1  10   60.59    5.20
   4  -1  10   69.99    5.40
   4  -1  10   70.49    5.30
  -4   1  10   62.59    4.40
   4   1 -10   61.09   12.20
   4  -1 -10   57.89   11.40
   4   1  10   60.59    5.30
   4   1  10   59.59    4.60
   4   1  10   72.39    6.40
  -4  -1  10   58.49    4.40
   4   1  10   63.79    5.70
   4   1  10   62.69    5.70
   4  -1 -10   56.99    4.70
   4   1  10   62.69    5.00
   5  -1  10  704.53   37.00
   5   1 -10  650.53   48.00
   5  -1  10  781.32   35.60
   5  -1  10  752.52   37.20
  -5   1  10  719.13   35.80
   5  -1  10  667.43   38.00
   5   1 -10  668.73   36.50
   5  -1  10  702.13   37.40
  -5  -1  10  702.93   35.70
   5   1  10  753.82   35.50
   5   1  10  751.42   38.10
   5   1  10  736.93   38.50
   5   1  10  730.83   38.00
   5   1  10  756.92   36.10
   5  -1 -10  704.33   36.40
   5   1  10  701.43   37.50
   5  -1 -10  710.13   48.40
   6   1 -10  597.74   32.90
   6  -1  10  640.64   33.60
   6  -1  10  694.53   35.60
   6  -1  10  603.34   34.30
   6  -1  10  713.43   33.70
   6   1 -10  624.04   35.20
  -6   1  10  688.93   32.40
   6   1 -10  622.14   31.80
   6  -1  10  705.53   32.10
   6   1 -10  563.94   34.20
   6  -1 -10  595.34   38.70
   6   1  10  602.94   34.60
   6  -1 -10  652.53   32.80
  -6  -1  10  653.63   32.20
   6   1  10  721.23   32.00
   6  -1 -10  582.24   35.60
   6   1  10  674.33   32.50
   6   1  10  648.34   34.50
   7  -1  10   98.29    7.10
  -7   1  10   88.69    6.50
   7   1 -10   93.89    6.50
   7   1 -10  101.89    6.00
   7  -1  10  101.69    6.60
   7  -1  10   90.49    7.90
   7   1  10   95.89    7.20
   7  -1 -10   99.89    6.40
  -7  -1  10   91.69    6.70
   7   1  10   80.59    7.50
   7   1  10  102.79    6.10
   7   1  10  105.69    7.40
   8   1 -10   69.19    4.60
   8  -1  10   62.39    4.90
   8  -1  10   65.59    5.70
   8   1  10   73.49    4.90
   8  -1 -10   72.49    4.40
   8   1  10   65.09    5.40
   0   2 -10  428.26   24.20
   0   2  10  424.56   20.50
   0  -2  10  413.46   20.60
   0   2 -10  391.36   32.20
   0  -2 -10  379.26   32.40
   1   2 -10  315.27   30.80
   1   2 -10  294.47   23.10
   1  -2  10  265.47   18.90
  -1   2  10  324.37   15.60
   1  -2  10  320.77   16.50
   1   2  10  332.77   16.50
   1   2  10  311.27   17.90
  -1  -2  10  337.77   16.20
  -1   2 -10  337.17   19.10
  -2   2  10    2.00    0.90
   2   2 -10   11.50    6.00
   2   2 -10    3.60    1.90
  -2  -2  10    3.60    0.80
   2  -2 -10   12.60    6.50
   3   2 -10  963.90   64.59
   3  -2  10 1028.30   50.39
   3   2 -10 1056.19   49.80
   3  -2  10  954.70   49.90
   3  -2  10 1001.60   50.99
  -3   2  10 1022.70   49.40
   3   2  10 1016.60   50.19
   3   2  10 1021.90   52.09
  -3  -2  10 1034.30   49.30
   3   2  10 1060.89   50.19
   3  -2 -10  906.11   49.50
   3   2  10 1046.80   51.39
   3   2  10 1102.99   50.39
  -3   2 -10  934.81   51.59
  -3  -2  10 1017.00   48.80
   3   2  10 1023.10   51.79
   3  -2 -10  975.40   49.10
   3  -2 -10 1020.50   64.89
   4   2 -10  828.72   60.79
   4  -2  10  906.31   47.40
  -4   2  10  963.10   46.50
   4  -2  10  964.90   47.60
   4  -2  10  967.10   48.70
  -4  -2  10  945.71   46.30
   4   2  10  960.50   48.30
   4   2  10  988.70   46.90
   4   2  10  923.31   49.30
   4   2  10  938.51   47.30
  -4  -2  10  963.80   45.80
  -4   2 -10  987.60   48.50
   4  -2 -10  901.81   46.70
   4   2  10  941.51   48.70
   4   2  10  953.90   47.80
   4  -2 -10  969.90   62.09
   5  -2  10  685.03   33.80
   5  -2  10  667.53   34.70
   5   2 -10  621.44   33.90
   5  -2  10  642.24   34.40
  -5   2  10  641.34   33.10
   5  -2  10  672.23   35.80
   5   2 -10  610.94   32.90
  -5  -2  10  675.93   33.10
   5   2  10  657.23   36.30
   5   2  10  703.23   33.60
   5   2  10  679.23   34.40
   5  -2 -10  640.64   33.40
   5   2  10  654.93   35.30
   5   2  10  673.53   32.90
   5   2  10  631.54   34.80
   5   2  10  708.33   35.70
   6   2 -10  356.66   18.80
   6  -2  10  405.16   22.30
   6   2 -10  350.36   19.80
  -6   2  10  371.46   21.10
   6  -2  10  351.46   20.20
   6  -2 -10  320.67   22.50
   6   2  10  418.26   19.20
   6  -2 -10  343.87   19.50
   6   2  10  365.16   21.20
  -6  -2  10  381.46   20.10
   6   2  10  360.06   19.80
   6   2  10  347.07   20.20
   6   2  10  366.06   21.20
   7   2 -10   35.10    2.70
   7   2 -10   31.40    3.20
   7  -2  10   34.40    4.30
   7  -2  10   35.30    3.70
   7   2  10   44.90    4.40
   7   2  10   38.00    4.20
   7   2  10   39.90    3.20
   7   2  10   39.30    2.70
   7  -2 -10   37.80    3.10
  -7  -2  10   33.90    2.90
   8   2 -10  265.87   13.80
   8  -2  10  287.17   15.40
   8  -2  10  230.98   14.10
   8   2  10  276.77   14.10
   8  -2 -10  275.97   13.50
   8   2  10  255.27   14.30
   0   3 -10  324.97   20.80
   0  -3  10  317.07   17.50
   0   3 -10  336.77   29.90
   0  -3 -10  334.47   30.10
   0   3  10  358.26   17.20
   0   3  10  346.17   19.20
   1  -3  10  517.25   27.90
   1   3 -10  546.15   41.50
   1   3 -10  551.04   32.60
  -1   3  10  575.64   27.90
   1   3  10  591.54   30.00
   1   3  10  565.04   27.90
  -1  -3  10  574.04   27.60
   1  -3 -10  531.35   27.90
  -1  -3  10  507.15   28.70
  -1   3 -10  579.94   31.00
   1  -3 -10  568.64   42.30
   2   3 -10  324.87   30.30
  -2   3  10  353.06   18.10
   2  -3  10  347.37   19.30
   2  -3  10  343.57   18.40
   2   3 -10  357.16   24.30
  -2  -3 -10  320.77   18.10
   2   3  10  336.57   20.40
   2   3  10  362.56   18.50
   2   3  10  354.06   18.40
  -2   3 -10  337.07   20.40
   2  -3 -10  345.77   18.00
   2  -3 -10  350.06   31.20
  -2  -3  10  362.06   18.00
   3  -3  10   54.79    4.70
   3  -3  10   54.49    5.00
   3   3 -10   58.49    4.30
   3   3 -10   46.10   11.30
  -3   3  10   56.79    4.10
  -3  -3 -10   49.20    4.20
   3  -3  10   54.19    4.60
   3   3  10   49.00    5.10
   3   3  10   57.59    4.90
  -3  -3  10   54.29    4.00
   3  -3 -10   61.99    4.00
   3  -3 -10   45.90    4.00
   3   3  10   51.99    5.80
   3   3  10   55.79    4.80
   3  -3 -10   53.59   11.10
  -3   3 -10   61.69    5.90
   4  -3  10  583.44   32.60
  -4   3  10  599.94   30.50
   4  -3  10  629.84   31.60
   4   3 -10  540.55   30.40
   4  -3  10  531.15   34.60
   4  -3 -10  589.84   30.30
   4   3  10  650.03   31.00
   4   3  10  542.55   33.00
   4   3  10  621.24   32.00
   4   3  10  605.34   32.80
  -4  -3  10  620.14   30.30
  -4   3 -10  697.33   33.50
   5   3 -10  852.51   61.69
   5  -3  10  957.50   49.50
   5   3 -10  908.71   47.90
   5  -3  10 1024.90   50.99
   5  -3  10  951.50   49.30
   5   3 -10  996.80   48.90
  -5   3  10  983.00   48.10
   5   3  10  954.40   51.59
   5   3  10  986.70   49.70
   5  -3 -10 1055.69   62.89
   5  -3 -10  968.80   47.90
  -5   3 -10 1006.80   50.79
   5   3  10  959.70   49.60
   5   3  10 1016.60   48.60
  -5  -3  10  974.40   47.80
  -6   3  10  226.78   12.30
   6  -3  10  232.28   15.00
   6  -3  10  216.38   13.30
   6   3 -10  214.28   12.10
   6   3 -10  222.68   12.90
   6   3  10  228.58   11.90
   6  -3 -10  215.58   16.90
   6   3  10  219.68   14.50
   6   3  10  218.68   13.90
   6  -3 -10  220.28   12.10
   6   3  10  219.18   12.60
  -6  -3  10  222.28   12.10
   7  -3  10   86.49    7.20
   7  -3  10   84.29    6.00
   7   3 -10   82.99    5.60
  -7  -3  10   75.79    4.90
   7   3  10   79.59    6.50
   7   3  10   82.89    5.30
   7  -3 -10   79.79    4.90
   8  -3  10  132.79    8.80
   8   3 -10  159.98    8.00
   8  -3  10  152.28    8.40
   8   3  10  145.69    7.70
   8  -3 -10  136.39    7.80
   8   3  10  149.49    8.70
   0   4  10  481.35   25.70
   0  -4 -10  460.25   23.90
   0  -4  10  461.55   23.80
   0  -4  10  475.75   23.50
   0   4 -10  424.96   37.20
   0   4 -10  494.45   28.90
   1   4 -10   49.20    7.00
  -1  -4 -10   43.80    3.70
  -1   4  10   49.00    4.80
   1  -4  10   50.99    3.90
  -1   4  10   49.70    3.70
   1   4 -10   55.59   11.40
   1  -4  10   47.60    3.30
  -1  -4  10   46.80    3.60
   1   4  10   44.60    5.00
   1  -4 -10   41.30    3.60
  -1   4 -10   44.60    5.70
  -1  -4  10   46.40    3.50
   1  -4 -10   54.19   11.60
   2  -4  10 1177.68   62.49
   2   4 -10 1266.37   67.89
  -2   4  10 1254.07   61.09
  -2  -4 -10 1268.37   61.29
   2  -4  10 1206.58   61.89
  -2   4 -10 1298.57   64.59
   2   4  10 1173.68   67.39
  -2  -4  10 1323.57   60.99
   2  -4 -10 1350.06   80.59
   2  -4 -10 1246.08   60.89
   3   4 -10  526.25   30.20
  -3  -4 -10  577.84   30.20
  -3   4  10  619.44   30.30
   3  -4  10  620.34   31.30
   3  -4  10  587.64   30.70
   3   4 -10  566.14   30.10
   3  -4  10  589.54   31.80
   3   4 -10  587.74   46.50
   3   4  10  636.84   30.70
   3  -4 -10  585.44   29.60
   3  -4 -10  632.34   46.80
   3   4  10  556.54   32.10
  -3  -4  10  617.14   30.00
   3   4  10  609.84   33.70
  -3   4 -10  658.33   33.60
   4   4 -10  444.06   25.10
   4   4 -10  439.76   40.60
  -4  -4 -10  475.25   24.90
  -4   4  10  474.05   25.00
   4  -4  10  524.05   26.20
   4  -4  10  459.15   27.00
   4   4 -10  491.45   25.80
   4  -4  10  489.35   26.20
  -4   4 -10  521.25   28.20
   4   4  10  501.05   25.60
   4   4  10  476.05   27.30
  -4  -4  10  485.45   24.80
   4   4  10  537.35   30.10
   4  -4 -10  491.25   40.60
   4   4  10  475.55   28.60
   5  -4  10   30.40    3.70
   5  -4  10   36.40    5.00
   5   4 -10   36.60   10.20
   5  -4  10   45.30    5.40
   5   4 -10   29.30    3.20
   5   4 -10   33.00    3.50
   5   4  10   32.60    4.40
   5   4  10   38.10    5.90
   5  -4 -10   34.50    3.00
  -5   4 -10   44.00    5.70
   5   4  10   36.00    3.50
   5  -4 -10   34.00   10.30
  -5  -4  10   33.70    3.00
   6  -4  10  313.27   17.80
   6  -4  10  347.27   19.50
   6   4 -10  318.27   16.70
   6   4 -10  335.97   17.30
   6   4  10  301.27   17.10
   6   4  10  311.17   19.50
   6  -4 -10  301.97   16.00
  -6  -4  10  312.87   16.50
   7  -4  10    2.60    1.60
   7   4 -10    6.40    1.40
   7  -4  10    5.40    1.40
   7   4 -10    9.60    1.80
   7   4  10    6.60    2.40
   7   4  10    6.80    1.20
  -7  -4  10    5.20    1.00
   8  -4  10  101.39    5.80
   8   4 -10  116.49    6.10
   8  -4  10   84.69    6.00
   8   4  10   96.89    5.40
   8   4  10  101.89    6.00
   0  -5 -10  177.68    9.80
   0   5 -10  154.88   22.00
   0   5  10  166.18   11.70
   0  -5  10  171.48    9.80
   0  -5  10  161.28    9.30
   0   5 -10  172.78   14.60
   1  -5  10  143.79    8.00
   1  -5  10  149.59    8.80
  -1   5  10  141.69   10.10
  -1  -5 -10  147.19    8.60
   1   5 -10  140.29   13.20
   1  -5  10  132.89    8.90
  -1  -5  10  150.28    8.30
   1  -5 -10  121.49   24.00
   1   5  10  142.09   10.80
   1  -5 -10  142.59    8.40
  -1   5 -10  129.79   11.80
  -1  -5  10  144.19    8.50
  -2  -5 -10  407.56   20.70
   2   5 -10  355.56   20.80
   2   5 -10  396.86   36.70
  -2   5  10  373.36   22.00
   2  -5  10  408.16   21.50
   2  -5  10  325.37   22.30
  -2   5 -10  437.76   24.80
   2   5  10  375.56   27.80
   2  -5 -10  400.16   20.30
  -2  -5  10  430.06   21.00
   2  -5 -10  423.06   37.60
   3   5 -10  360.46   34.80
  -3  -5 -10  370.46   19.10
   3  -5  10  375.66   20.20
  -3   5  10  365.06   20.80
   3  -5  10  364.36   19.80
   3   5 -10  340.47   25.60
   3   5 -10  344.27   19.40
   3  -5  10  355.36   20.70
   3   5 -10  344.47   18.90
  -3   5 -10  376.06   22.70
   3  -5 -10  360.86   18.40
   3  -5 -10  373.56   34.30
   3   5  10  361.86   22.70
   3   5  10  368.86   19.60
   4   5 -10    2.30    1.10
   4   5 -10    4.10    1.50
  -4  -5 -10    3.90    1.10
   4  -5  10    3.40    1.30
   4  -5  10    1.90    1.20
   4   5 -10   -2.80    5.80
   4  -5 -10   15.60    8.40
   4   5  10    3.60    1.30
   4   5  10    0.60    4.00
  -4  -5  10    4.90    1.20
   5  -5  10   16.80    2.90
   5   5 -10   12.50    2.10
  -5  -5 -10   10.70    1.90
   5   5 -10   14.60    2.10
   5  -5  10   10.00    2.10
   5   5 -10    5.30    7.80
   5   5  10   13.70    2.00
  -5   5 -10   18.20    4.40
  -5  -5  10   10.70    1.60
   5   5  10   10.70    2.40
   5  -5 -10   18.10    8.70
   6   5 -10  193.18   10.20
   6   5 -10  181.88    9.80
   6  -5  10  184.48   11.80
   6  -5  10  172.38   10.70
   6   5  10  169.28   11.60
  -6  -5  10  169.58    9.70
   6   5  10  172.18   10.30
   7  -5  10   68.59    4.50
   7  -5  10   56.59    4.80
   7   5 -10   66.59    3.80
  -7  -5  10   61.49    3.70
   7   5  10   62.19    4.90
   7   5  10   63.39    4.30
   0  -6  10    3.40    1.40
   0  -6 -10    2.90    1.00
   0   6 -10    8.10    3.90
   0  -6  10    3.50    1.10
   0   6  10    3.50    2.40
  -1   6  10 1599.84   78.69
   1  -6  10 1563.64   76.39
  -1  -6 -10 1550.84   75.99
   1   6 -10 1436.56   82.89
   1  -6  10 1597.14   75.39
   1  -6  10 1573.34   76.69
  -1  -6  10 1574.64   75.79
   1   6  10 1585.14   79.69
   1  -6 -10 1567.84   75.89
  -1  -6  10 1629.54   76.29
   2   6 -10  611.94   33.80
  -2   6  10  692.23   35.80
  -2  -6 -10  685.03   33.50
   2   6 -10  650.03   41.10
   2  -6  10  699.13   34.50
  -2   6  10  629.44   35.40
   2  -6  10  684.23   34.10
   2   6  10  704.73   37.50
  -2  -6  10  678.23   33.30
  -2   6 -10  669.43   38.40
   2   6  10  618.04   35.20
   3  -6  10  245.38   15.10
   3   6 -10  202.78   12.70
  -3   6  10  209.88   14.40
  -3  -6 -10  233.78   12.50
   3   6 -10  217.58   26.70
   3  -6  10  226.18   13.20
   3  -6  10  219.48   13.30
   3   6 -10  239.08   12.90
  -3   6 -10  232.48   16.40
  -3  -6  10  217.08   12.30
   3  -6 -10  205.18   26.50
   3  -6 -10  213.98   11.70
   3   6  10  218.68   15.80
   3   6  10  224.28   14.40
   3   6  10  226.88   13.10
  -4  -6 -10    8.90    1.70
   4  -6  10   10.70    2.30
   4   6 -10   13.00    2.00
   4   6 -10   14.70    8.20
   4  -6  10   10.70    2.10
   4   6 -10   10.20    1.80
   4  -6 -10    7.30    8.20
   4   6  10   11.00    2.30
  -4   6 -10    5.70    3.00
  -4  -6  10   13.80    1.80
   4   6  10    9.00    1.80
   5   6 -10  787.92   39.80
   5  -6  10  814.12   41.70
  -5  -6 -10  798.32   39.40
   5   6 -10  872.31   39.60
   5  -6  10  831.12   40.70
  -5   6 -10  751.62   43.50
   5   6  10  773.52   41.40
   5   6  10  775.42   40.20
   6   6 -10  170.48    9.10
   6   6 -10  184.78    9.10
   6  -6  10  171.48   10.80
   6  -6  10  160.98    9.90
   6   6  10  170.98    9.80
  -6  -6  10  174.38    9.30
   6   6  10  172.68   10.60
   7  -6  10  151.38    8.40
   7  -6  10  158.78    8.80
   7   6  10  144.59    8.50
   7   6  10  167.68    8.30
   0  -7  10  644.24   31.70
   0  -7 -10  628.94   32.10
   0  -7  10  699.13   32.90
   0   7 -10  590.94   38.30
   0   7  10  635.64   35.60
  -1   7  10  541.25   32.50
   1  -7  10  578.24   27.90
   1  -7  10  562.54   29.20
   1   7 -10  561.84   35.50
   1  -7  10  595.24   29.40
  -1  -7  10  587.04   29.20
   1   7  10  565.74   30.30
   1   7  10  496.75   31.60
  -1  -7  10  591.44   28.50
   1  -7 -10  563.14   28.40
   2  -7  10   70.59    5.50
   2   7 -10   64.09    5.20
  -2  -7 -10   64.49    5.30
   2  -7  10   74.89    6.80
   2   7 -10   57.19   11.20
   2   7 -10   78.29   22.20
   2   7  10   65.49    5.60
   2  -7 -10   73.49    5.10
   2  -7 -10   78.89   23.60
  -2   7 -10   79.29    9.10
  -2  -7  10   72.19    5.00
   2   7  10   52.59    7.60
   3  -7  10   12.10    2.40
   3   7 -10   10.70    1.90
   3  -7  10   14.10    2.20
  -3  -7 -10    8.30    1.40
   3   7  10   10.30    1.90
  -3   7 -10    7.20    2.80
  -3  -7  10   10.90    1.60
   3   7  10    8.00    2.20
   4  -7  10   27.00    3.00
   4  -7  10   31.30    3.70
  -4  -7 -10   26.70    2.40
   4   7 -10   24.60    2.70
   4   7  10   23.60    3.10
   4   7  10   32.10    3.20
  -4  -7  10   25.60    2.40
  -4   7 -10   23.30    5.20
   5  -7  10   84.29    6.50
   5  -7  10   88.89    5.80
   5   7 -10   87.79    5.20
  -5  -7 -10   87.09    5.10
   5   7  10   78.69    6.10
  -5  -7  10   84.79    5.20
   5   7  10   83.79    5.90
   6  -7  10  325.77   17.40
   6  -7  10  332.47   18.10
   6   7  10  333.47   17.70
   6   7  10  387.06   17.70
  -6  -7  10  348.87   17.10
   0   8  10   11.60    2.00
   0  -8 -10   11.40    1.60
   0  -8  10   10.50    1.40
   0   8 -10    8.80    3.80
   1   8 -10   78.39   10.10
  -1  -8 -10  102.69    6.20
   1  -8  10   94.39    6.40
  -1  -8  10  102.09    5.90
  -1   8 -10   97.59   10.40
   1   8  10   91.29    6.90
   1  -8 -10   99.19    5.90
   2  -8  10   26.60    3.00
   2  -8  10   31.10    3.50
  -2  -8 -10   28.30    2.60
   2   8 -10   24.20    2.70
   2   8 -10   19.70    8.00
   2   8  10   31.60    3.20
   2   8  10   31.10    3.40
   2  -8 -10   27.30    2.20
  -2   8 -10   25.30    5.40
  -2  -8  10   30.80    2.60
   3  -8  10  135.59    9.10
  -3  -8 -10  137.69    7.70
   3  -8  10  134.09    8.20
   3   8 -10  138.29    8.00
  -3   8 -10  112.39   15.70
   3   8  10  130.79    8.80
   3   8  10  141.29    8.60
  -3  -8  10  131.49    7.60
   4   8 -10  108.59    6.90
  -4  -8 -10  113.99    6.40
   4  -8  10  109.29    7.10
   4  -8  10  118.59    7.70
   4   8  10   94.29    7.30
  -4  -8  10  122.69    6.50
   4   8  10  118.49    7.30
   5  -8  10    5.80    1.20
   5  -8  10    6.90    1.00
  -5  -8 -10    7.30    1.10
   5   8  10    6.60    1.10
   5   8  10    7.10    1.10
  -5  -8  10    5.90    0.90
   0  -9 -10  193.98   10.20
   0  -9  10  180.28   10.00
   1   9 -10  132.29    7.80
  -1  -9 -10  128.39    7.70
   1  -9  10  140.49    9.20
  -1  -9  10  139.99    7.30
   1   9  10  132.69    8.50
  -2  -9 -10   71.99    4.60
   2  -9  10   65.99    4.50
   2  -9  10   82.39    5.80
   2   9 -10   80.39    4.80
   2   9  10   84.69    5.40
   2  -9 -10   70.29    4.70
  -2  -9  10   78.49    4.50
   3   9 -10  197.78   10.30
  -3  -9 -10  213.68   10.50
   3  -9  10  211.48   11.40
   3  -9  10  167.48   10.60
   3   9  10  191.28   10.80
  -3  -9  10  209.08   10.30
   4  -9  10  137.89    7.70
  -4  -9 -10  132.19    7.00
   4   9  10  137.29    7.40
  -4  -9  10  127.59    7.00
   0  10  10    9.20    1.10
   0 -10  10    9.60    1.30
   0 -10 -10    9.80    0.90
   1 -10  10  100.69    7.40
  -1  10  10  119.79    6.80
  -1 -10 -10  126.99    6.30
   1  10  10  128.39    7.00
   0   0 -11   -2.00    4.80
   0   0  11   -0.40    0.50
   1   0  11  513.65   25.00
  -1   0  11  473.45   23.60
   1   0  11  475.45   24.10
  -1   0 -11  448.96   26.00
  -2   0  11    1.90    0.80
  -2   0  11    7.30    1.50
   2   0 -11    2.40    3.90
   2   0  11    4.40    1.40
   2   0  11    2.50    1.00
  -2   0 -11    4.00    2.10
   3   0 -11  122.89    7.30
   3   0  11  103.59   10.80
   3   0 -11  118.29   17.20
   3   0  11  127.49    7.90
  -3   0  11  116.59    7.20
   3   0  11  135.69    8.60
   3   0  11  121.99    8.00
   3   0  11  120.89    8.50
  -4   0  11   69.59    4.90
   4   0  11   69.29    5.80
   4   0 -11   67.39    5.50
   4   0 -11   61.59   12.70
   4   0  11   67.49    5.50
   4   0  11   86.29    6.70
   4   0  11   79.69    6.60
   4   0  11   80.49    6.40
   5   0  11  130.69    9.00
   5   0  11  121.69    8.40
   5   0  11  125.09    9.40
  -5   0  11  118.89    7.50
   5   0 -11  106.49   24.10
   5   0  11  121.89    9.10
   5   0 -11  124.99    8.20
   5   0  11  123.09    7.40
   6   0  11   74.19    7.10
   6   0  11   86.19    5.30
  -6   0  11   83.49    5.50
   6   0  11   66.79    8.30
   6   0  11   73.49    6.40
   6   0 -11   81.29    5.90
  -7   0  11  279.27   13.80
   7   0  11  242.88   16.00
   7   0  11  279.27   13.40
   7   0  11  238.48   14.70
   7   0 -11  252.07   14.20
   8   0 -11   27.80    2.20
   8   0  11   22.20    2.00
   8   0  11   21.50    2.60
   0   1  11  142.49    7.50
   0   1 -11  145.09   10.70
   0  -1  11  140.39    7.60
   0  -1 -11  110.79   16.90
   0   1 -11  104.89   16.00
   1  -1  11  438.06   22.20
   1  -1  11  491.95   22.90
   1   1 -11  406.86   34.60
  -1   1  11  456.65   21.90
   1   1 -11  396.16   32.20
   1   1  11  455.45   22.30
   1  -1 -11  393.46   34.50
   1   1  11  421.36   23.20
  -1   1 -11  438.16   24.90
  -1  -1  11  455.25   21.90
   2   1 -11 1326.97   63.79
  -2   1  11 1334.67   63.19
   2   1 -11 1170.98   78.39
   2  -1  11 1300.97   63.69
   2  -1  11 1469.95   64.29
  -2  -1  11 1320.37   62.79
   2   1  11 1357.06   63.79
   2  -1 -11 1176.48   78.19
  -2   1 -11 1303.27   65.69
  -2  -1  11 1300.37   63.29
   2  -1 -11 1307.57   63.49
   3  -1  11  137.19    9.10
   3  -1  11  162.68    9.40
   3  -1  11  145.89    9.00
  -3   1  11  148.39    8.40
   3   1 -11  137.09    8.40
   3  -1  11  141.89    9.70
  -3   1 -11  136.89   10.00
  -3  -1  11  136.99    8.40
   3   1  11  150.28    9.00
   3   1  11  158.78   10.50
   3   1  11  152.58    9.90
  -3  -1  11  147.49    7.80
   3  -1 -11  139.79    8.40
   3   1  11  146.69    9.20
   3   1  11  135.79    9.40
   4  -1  11  936.21   47.60
   4   1 -11  835.32   61.59
   4  -1  11 1026.40   47.70
  -4   1  11  955.50   46.30
   4  -1  11  987.20   47.40
  -4  -1  11  939.61   46.30
   4   1  11  942.71   46.30
   4   1  11  958.80   47.10
   4  -1 -11  919.51   46.90
   4  -1 -11  928.21   62.59
   4   1  11  955.10   48.80
   4   1  11  897.21   47.50
   5  -1  11 1052.79   54.09
   5   1 -11 1047.60   53.19
   5  -1  11 1134.99   53.59
   5   1 -11 1103.89   85.69
  -5   1  11 1055.19   52.29
   5  -1  11 1037.60   54.79
   5   1  11 1069.09   54.99
   5  -1 -11 1035.10   52.89
   5   1  11 1012.90   54.29
  -5  -1  11 1083.89   52.29
   5   1  11 1024.00   54.09
   5   1  11 1089.89   52.29
   5   1  11 1133.69   53.59
   6  -1  11  235.18   15.00
  -6   1  11  264.37   13.70
   6  -1  11  278.97   14.60
   6  -1  11  265.97   19.50
   6   1  11  270.57   13.60
   6   1  11  208.38   18.90
  -6  -1  11  264.27   13.60
   6   1  11  241.78   17.00
   6   1  11  229.48   16.00
   6  -1 -11  210.28   16.10
   7   1 -11  296.17   16.00
  -7   1  11  296.47   15.30
   7  -1  11  286.77   17.80
   7  -1  11  274.07   16.20
   7  -1  11  302.47   15.70
   7  -1 -11  291.07   15.60
  -7  -1  11  307.27   15.30
   7   1  11  284.07   15.20
   7   1  11  280.67   17.20
   7   1  11  312.27   16.70
   8  -1  11  353.56   19.30
   8   1 -11  360.86   18.20
   8   1  11  373.76   18.40
   8  -1 -11  342.57   18.40
   0  -2  11 2964.10  138.69
   0   2 -11 2730.63  155.78
   0   2  11 3061.19  138.59
   0   2 -11 2911.21  142.99
   0  -2 -11 2871.61  157.28
  -1   2  11  883.21   42.50
   1   2 -11  819.22   58.39
   1  -2  11  911.31   43.60
   1   2 -11  866.11   48.10
  -1   2  11  907.51   43.40
   1   2  11  910.51   45.30
  -1  -2  11  906.81   43.30
   1  -2 -11  870.21   43.60
  -1  -2  11  904.51   43.20
   1  -2 -11  845.92   58.79
   1   2  11  922.01   43.60
   2  -2  11  396.96   22.30
  -2   2  11  411.46   21.40
   2   2 -11  443.76   22.40
   2   2 -11  392.46   34.80
   2  -2  11  418.46   21.60
   2  -2 -11  433.76   21.40
   2   2  11  372.16   23.00
  -2   2 -11  414.86   23.80
   2   2  11  444.66   21.90
  -2  -2  11  407.06   20.70
  -2  -2  11  416.86   21.30
   2  -2 -11  417.76   35.30
   3  -2  11  376.66   19.40
   3  -2  11  329.07   19.50
   3   2 -11  349.67   18.30
   3  -2  11  308.07   21.80
  -3  -2 -11  322.37   18.30
  -3   2  11  365.66   18.20
   3   2 -11  336.17   31.90
   3   2  11  368.26   18.40
   3  -2 -11  342.47   18.00
   3   2  11  345.67   19.00
  -3  -2  11  351.86   18.00
  -3   2 -11  349.37   20.40
   3  -2 -11  318.57   18.30
   3  -2 -11  357.26   32.30
   3   2  11  334.17   19.30
   3   2  11  354.56   20.80
   3   2  11  373.26   20.10
  -3  -2  11  363.06   18.10
   4  -2  11  176.58   12.60
  -4   2  11  188.98   10.80
   4  -2  11  211.38   11.90
   4  -2 -11  176.38   10.90
  -4   2 -11  173.98   16.70
   4   2  11  188.78   13.30
   4   2  11  170.98   14.00
   4   2  11  191.98   11.60
   4  -2 -11  195.98   23.10
   4   2  11  200.68   12.40
  -4  -2  11  191.38   10.80
   4   2  11  205.98   11.20
   5  -2  11  566.74   30.80
   5   2 -11  569.94   30.70
   5   2 -11  569.24   44.00
  -5   2  11  581.74   29.80
   5  -2  11  568.74   31.30
   5  -2  11  564.34   32.20
   5   2  11  569.84   31.60
   5   2  11  606.04   32.10
   5  -2 -11  637.04   44.40
   5   2  11  590.04   31.60
   5   2  11  592.54   33.10
   5  -2 -11  587.84   30.10
  -5  -2  11  590.54   29.70
   5   2  11  647.04   30.20
   5   2  11  594.84   31.00
   6  -2  11   65.99    6.30
   6  -2  11   59.09    5.20
   6   2 -11   64.29    5.10
  -6   2  11   60.79    4.50
   6   2  11   55.89    5.60
   6   2  11   67.09    6.00
  -6  -2  11   60.89    4.40
   6   2  11   63.89    4.60
   6  -2 -11   55.39   12.70
   6  -2 -11   62.29    4.70
   7  -2  11  196.08   13.00
   7   2 -11  189.08   11.10
   7  -2  11  170.68   11.20
   7   2  11  198.78   12.00
  -7  -2  11  209.08   10.50
   7   2  11  205.98   10.60
   7  -2 -11  200.58   10.70
   7   2  11  177.58   11.90
   8   2 -11  118.59    7.00
   8  -2  11  104.09    6.40
   8  -2 -11  106.09    5.70
   8   2  11  100.39    6.40
   0   3  11 1305.67   63.79
   0  -3 -11 1263.87   79.99
   0   3 -11 1200.18   78.39
   0   3  11 1319.17   61.29
   0  -3  11 1306.37   60.99
   0  -3  11 1207.88   61.19
   0   3 -11 1226.28   65.99
   0   3  11 1272.07   60.89
   1   3 -11 1022.10   67.99
   1  -3  11 1066.39   50.79
  -1  -3 -11  986.50   53.29
   1  -3  11  904.71   51.19
  -1   3  11 1097.49   51.29
   1   3 -11  993.20   56.69
  -1  -3  11 1099.49   51.09
   1   3  11 1085.79   53.79
  -1  -3  11 1054.89   50.99
  -1   3 -11 1135.69   55.39
   1  -3 -11 1036.00   68.59
   1  -3 -11 1079.99   51.49
   1   3  11 1073.69   51.39
  -2   3  11  245.08   13.40
   2   3 -11  227.48   18.50
   2  -3  11  237.28   14.40
   2  -3  11  261.97   14.10
  -2  -3 -11  236.28   13.50
   2   3 -11  240.48   26.20
   2  -3 -11  240.98   26.20
   2   3  11  279.27   13.50
   2  -3 -11  241.28   13.30
  -2  -3  11  250.17   13.10
  -2   3 -11  246.98   16.10
   2   3  11  244.18   13.70
  -2  -3  11  236.08   13.00
   2   3  11  235.68   15.50
  -3   3  11   59.09    4.30
   3  -3  11   47.50    5.10
   3  -3  11   57.49    4.90
   3   3 -11   63.19    4.50
   3   3 -11   58.09   12.70
   3  -3  11   57.89    4.70
  -3  -3 -11   48.50    4.30
  -3   3 -11   58.69    6.10
   3   3  11   54.99    5.10
   3  -3 -11   71.59   13.20
   3  -3 -11   49.10    4.10
  -3  -3  11   59.19    4.10
   3   3  11   66.99    5.20
   3   3  11   56.79    6.40
   3   3  11   62.59    5.70
   3  -3 -11   56.79    4.00
  -3  -3  11   57.29    4.10
   3   3  11   59.09    4.50
  -4  -3 -11  266.17   16.00
   4  -3  11  315.97   17.40
   4  -3  11  305.97   17.10
  -4   3  11  306.07   16.30
   4   3 -11  266.37   29.60
   4  -3  11  291.57   18.00
   4   3  11  324.37   17.50
   4  -3 -11  306.17   29.60
   4   3  11  293.67   19.30
  -4  -3  11  290.77   16.00
   4   3  11  312.87   17.50
  -4  -3  11  303.37   15.80
  -4   3 -11  299.77   19.00
   4   3  11  291.97   18.20
   4   3  11  327.47   16.60
   5   3 -11  276.67   29.30
   5  -3  11  308.17   18.00
   5  -3  11  344.77   19.00
   5  -3  11  325.67   19.50
   5   3 -11  334.27   18.10
  -5   3  11  317.07   17.20
   5   3  11  320.87   19.50
   5   3  11  331.07   17.50
   5  -3 -11  321.97   17.00
   5  -3 -11  351.66   30.20
   5   3  11  320.57   20.80
  -5  -3  11  324.27   17.10
   5   3  11  318.07   18.50
   5   3  11  303.77   18.70
   6  -3  11  319.57   18.40
  -6   3  11  344.87   17.50
   6  -3  11  338.27   20.20
   6   3 -11  331.57   18.10
   6   3  11  335.37   19.00
  -6  -3  11  332.67   17.30
   6   3  11  324.97   19.70
   6  -3 -11  328.17   17.20
   7  -3  11    9.40    1.90
   7  -3  11   16.80    3.00
   7   3 -11   11.10    1.60
   7   3  11    8.90    2.00
   7   3  11    9.80    1.40
   7  -3 -11   10.60    1.30
  -7  -3  11   10.30    1.60
   8   3 -11   14.70    1.30
   8  -3  11   10.70    1.30
   8  -3  11   10.50    1.70
   8   3  11   14.60    1.70
   0  -4  11 1258.57   64.29
   0  -4 -11 1390.66   64.59
   0   4  11 1381.36   66.89
   0   4 -11 1347.27   70.29
   0  -4  11 1371.96   63.99
   0   4 -11 1190.68   82.79
  -1  -4 -11 1183.88   56.79
   1  -4  11 1169.78   55.99
  -1   4  11 1115.09   64.09
  -1   4  11 1252.47   56.59
   1   4 -11 1222.18   77.29
   1  -4  11  986.70   57.79
  -1   4 -11 1154.98   60.99
   1  -4 -11 1167.48   77.19
  -1  -4  11 1133.79   56.39
  -1  -4  11 1200.08   56.29
   1  -4 -11 1153.18   56.59
   2  -4  11  350.96   20.00
  -2   4  11  388.36   19.60
   2   4 -11  356.96   34.70
   2  -4  11  357.46   20.60
   2  -4  11  366.46   19.80
  -2  -4 -11  372.26   19.60
   2  -4 -11  367.26   19.30
   2  -4 -11  368.56   34.60
  -2   4 -11  381.66   23.10
  -2  -4  11  377.56   19.30
  -2  -4  11  375.86   19.30
   2   4  11  395.06   19.70
   2   4  11  369.66   22.50
  -3  -4 -11   42.20    4.00
   3  -4  11   46.30    4.70
   3   4 -11   42.90    3.70
   3  -4  11   44.70    4.20
  -3   4  11   47.90    3.80
   3  -4  11   43.90    4.20
  -3  -4  11   41.70    3.50
   3   4  11   43.50    4.00
  -3   4 -11   39.50    6.20
   3   4  11   43.60    5.70
   3   4  11   50.19    5.20
   3  -4 -11   46.10    3.40
   4   4 -11  418.36   39.50
  -4  -4 -11  450.95   23.90
   4  -4  11  445.16   25.90
   4  -4  11  484.85   25.10
   4  -4  11  458.15   25.10
   4   4 -11  442.96   24.80
  -4   4  11  461.95   24.10
  -4  -4  11  483.45   23.90
   4   4  11  468.85   27.90
  -4  -4  11  469.35   23.80
   4   4  11  493.85   24.60
  -4   4 -11  489.15   27.70
   4   4  11  457.35   26.50
   4  -4 -11  479.25   39.80
   5  -4  11  178.78   15.00
   5   4 -11  138.09   22.00
   5   4 -11  160.08    9.90
   5  -4  11  177.78   11.30
   5   4 -11  179.68   12.80
  -5  -4  11  183.48   10.30
   5   4  11  199.68   14.60
   5   4  11  179.68   11.00
   6  -4  11   95.79    8.00
   6   4 -11  101.39    6.60
   6  -4  11   95.99    6.80
   6   4  11   99.09    6.40
   6   4  11  103.79    7.90
  -6  -4  11   88.99    5.90
   7  -4  11  150.88    9.80
   7   4 -11  164.28    8.60
   7  -4  11  137.69    8.70
  -7  -4  11  148.29    8.20
   7   4  11  156.58    8.40
   0   5  11    6.90    2.50
   0  -5 -11   12.30    3.10
   0  -5  11   13.20    3.20
   0   5 -11    9.80    3.60
   0  -5  11   12.30    1.50
  -1  -5 -11 1144.59   56.29
   1   5 -11 1214.18   79.69
   1   5 -11 1092.69   64.69
   1  -5  11 1165.68   55.39
  -1   5  11 1003.70   62.89
   1  -5  11 1202.68   56.59
   1   5  11 1109.49   59.09
  -1  -5  11 1187.38   55.79
   1  -5 -11 1203.88   79.99
   1  -5 -11 1151.28   55.99
  -1  -5  11 1125.69   56.29
   2  -5  11  189.38   11.80
  -2  -5 -11  191.58   10.80
  -2   5  11  177.28   12.20
   2   5 -11  159.68   11.20
   2   5 -11  171.18   16.20
   2   5 -11  180.08   24.90
   2  -5  11  188.88   11.10
  -2   5 -11  176.68   14.20
   2   5  11  199.58   11.00
  -2  -5  11  201.28   10.80
   2   5  11  184.48   13.80
   2   5  11  180.68   12.30
   2  -5 -11  188.38   10.40
  -2  -5  11  186.68   10.50
  -3   5  11  691.53   36.60
  -3  -5 -11  706.03   34.60
   3  -5  11  723.63   35.50
   3  -5  11  676.33   35.30
   3  -5  11  680.43   36.40
   3   5 -11  669.13   53.79
   3   5 -11  618.24   34.50
   3   5 -11  666.73   34.30
   3   5  11  690.83   38.50
   3   5  11  726.03   35.20
  -3  -5  11  694.33   34.40
   3  -5 -11  712.73   53.99
  -3   5 -11  693.83   38.80
  -3  -5  11  711.33   34.60
   3   5  11  665.83   36.70
   3  -5 -11  686.13   33.90
   4   5 -11  145.49   22.70
   4  -5  11  183.28   11.30
   4  -5  11  194.38   13.90
   4   5 -11  197.58   11.20
  -4  -5 -11  179.58   10.50
   4  -5  11  174.28   12.30
  -4   5 -11  167.38   13.50
  -4  -5  11  181.08   10.30
   4   5  11  210.98   14.10
   4   5  11  183.88   12.80
   4   5  11  189.88   11.20
   4   5  11  170.38   14.10
   4  -5 -11  177.28   23.60
   5   5 -11  137.29    8.00
  -5  -5 -11  141.29    7.90
   5  -5  11  128.49    8.90
   5   5 -11  143.59    8.60
  -5   5 -11  119.99   13.10
   5   5  11  139.39    8.70
  -5  -5  11  138.09    8.10
   5   5  11  145.99   10.40
   6   5 -11  155.38    8.30
   6  -5  11  136.99    9.70
   6  -5  11  134.59    9.40
   6   5  11  128.59    8.70
  -6  -5  11  141.09    7.90
   6   5  11  146.79    9.80
   7  -5  11   30.10    2.80
   7  -5  11   26.20    2.30
   7   5 -11   28.80    1.90
   7   5  11   22.80    2.60
   7   5  11   25.40    2.10
  -7  -5  11   23.50    2.00
   0   6 -11  407.86   27.50
   0  -6 -11  397.66   21.20
   0  -6  11  398.36   21.70
   0   6  11  418.26   24.30
   0  -6  11  417.36   20.90
   1  -6  11  341.27   18.80
   1  -6  11  348.37   17.70
  -1  -6 -11  341.27   18.30
  -1   6  11  341.27   20.90
   1   6 -11  347.57   25.30
  -1   6 -11  329.97   23.30
  -1  -6  11  343.07   18.10
   1   6  11  357.06   21.90
  -1  -6  11  352.26   18.70
   1  -6 -11  358.66   18.30
   2   6 -11  305.07   34.10
  -2   6  11  279.07   18.40
   2   6 -11  245.08   23.80
  -2  -6 -11  301.77   15.70
   2  -6  11  290.27   16.30
   2   6 -11  270.97   15.80
   2  -6  11  297.27   17.30
   2  -6  11  259.07   16.80
  -2   6 -11  276.57   21.90
   2  -6 -11  306.07   15.40
   2   6  11  286.97   17.60
  -2  -6  11  276.07   15.40
   2  -6 -11  339.87   35.00
   2   6  11  304.77   16.20
   2   6  11  291.17   19.90
  -2  -6  11  324.17   16.70
   3  -6  11  267.87   17.50
   3  -6  11  304.47   17.40
   3   6 -11  284.07   16.10
  -3  -6 -11  296.37   15.60
   3   6 -11  286.37   36.40
   3   6  11  277.07   17.40
  -3   6 -11  274.97   19.40
   3  -6 -11  286.67   15.20
  -3  -6  11  298.07   15.40
   3   6  11  288.57   16.00
   3  -6 -11  264.97   35.50
   4  -6  11  135.29    9.00
   4   6 -11  135.99    8.40
   4   6 -11  154.08    8.70
  -4  -6 -11  146.99    8.30
   4  -6  11  141.99   10.00
  -4  -6  11  134.19    8.20
  -4   6 -11  142.89   12.00
   4   6  11  137.19   10.10
   4   6  11  144.69    9.00
   5   6 -11   88.29    5.30
   5  -6  11   79.89    5.80
   5  -6  11   90.99    7.00
  -5  -6 -11   74.39    4.90
   5   6  11   73.99    6.40
  -5  -6  11   79.29    5.10
   5   6  11   82.89    5.70
   6  -6  11   37.50    3.60
   6  -6  11   37.60    3.80
   6   6 -11   37.50    2.60
   6   6  11   36.50    2.90
   6   6  11   40.60    3.60
  -6  -6  11   34.50    3.10
   0  -7  11    2.60    1.30
   0  -7 -11    5.00    1.20
   0   7 -11   -0.50    2.40
  -1  -7 -11   25.90    3.30
   1  -7  11   22.80    2.10
  -1   7 -11   26.90    6.60
   1   7  11   24.20    3.60
  -1  -7  11   24.70    3.00
   1  -7 -11   25.50    3.20
   2   7 -11  223.88   13.40
  -2  -7 -11  258.77   13.40
   2  -7  11  245.68   14.90
   2  -7  11  254.27   13.90
   2   7 -11  231.98   19.40
  -2   7 -11  238.08   18.10
  -2  -7  11  246.48   13.20
   2  -7 -11  238.08   12.90
   2   7  11  235.68   14.90
   2   7  11  255.77   14.00
  -3  -7 -11  278.77   14.80
   3  -7  11  291.47   15.50
   3   7 -11  271.77   14.90
   3  -7  11  295.17   17.20
   3   7  11  266.77   16.40
   3   7  11  286.17   15.70
  -3   7 -11  246.38   18.80
  -3  -7  11  277.67   14.70
   4   7 -11    9.50    1.70
   4  -7  11    9.20    1.90
   4  -7  11    9.00    1.60
  -4  -7 -11    9.50    1.50
   4   7  11   10.50    1.70
   4   7  11   10.50    2.00
  -4  -7  11   11.20    1.40
  -5  -7 -11  191.28    9.60
   5  -7  11  180.88   11.00
   5  -7  11  164.28   10.30
   5   7  11  173.88   10.70
   5   7  11  189.88   10.30
  -5  -7  11  200.18    9.90
   6  -7  11   52.99    3.50
   6  -7  11   56.59    4.00
   6   7  11   60.09    3.60
  -6  -7  11   60.79    3.40
   6   7  11   59.69    3.80
   0  -8 -11  143.39    8.20
   0  -8  11  149.09    7.80
   0   8  11  139.89    9.20
   0   8 -11  128.29   12.90
   1   8 -11  148.09   14.30
  -1  -8 -11  177.38    9.60
   1   8 -11  170.88   10.00
  -1   8 -11  162.38   14.40
   1   8  11  166.18   10.00
   1  -8 -11  181.78    9.40
  -1  -8  11  172.68    9.20
   1   8  11  160.38   10.50
   2  -8  11    7.20    1.50
   2   8 -11    6.50    4.60
  -2  -8 -11    7.10    1.30
   2   8 -11    5.80    1.20
   2  -8  11    6.60    1.70
   2   8 -11    9.30    1.70
  -2  -8  11    6.10    1.20
   2   8  11    6.80    1.70
   2  -8 -11    7.10    1.20
  -2   8 -11    4.60    3.10
   2   8  11    7.00    1.80
   3  -8  11  291.77   15.70
  -3  -8 -11  318.77   15.90
   3  -8  11  292.57   16.80
   3   8 -11  290.57   15.30
  -3  -8  11  277.57   15.20
   3   8  11  297.47   16.30
   3   8  11  311.37   16.20
   4  -8  11   54.39    4.40
   4  -8  11   48.70    3.50
  -4  -8 -11   53.09    3.30
  -4  -8  11   53.49    3.50
   4   8  11   55.89    3.90
   4   8  11   51.39    3.90
   5  -8  11  299.07   15.20
  -5  -8  11  301.47   14.40
   5   8  11  265.87   14.60
   0   9  11  193.18   11.30
   0   9 -11  225.28   12.30
   0  -9 -11  222.48   11.10
   1  -9  11   31.40    3.00
  -1  -9 -11   28.70    2.20
   1   9 -11   31.70    2.50
   1  -9 -11   26.00    2.30
   1   9  11   25.30    2.40
   1  -9 -11   29.50    2.10
   1   9  11   31.50    2.70
  -1  -9  11   29.90    2.20
   2  -9  11  182.58   11.30
  -2  -9 -11  208.68   10.40
   2   9  11  208.48   11.00
  -2  -9  11  196.08   10.20
   3  -9  11   11.50    1.60
  -3  -9 -11   12.00    1.20
   3   9  11   10.40    1.30
  -3  -9  11   12.30    1.20
   0   0 -12 1608.64   74.59
   0   0 -12 1382.16   90.89
   0   0  12 1597.54   73.79
   1   0  12    2.30    1.20
  -1   0  12    4.80    1.00
   1   0 -12    5.90    5.40
   1   0  12    1.80    1.00
  -2   0  12    2.50    1.00
  -2   0  12    2.30    0.80
  -2   0 -12    0.10    0.90
   3   0 -12    6.80    6.40
   3   0  12    9.60    2.30
   3   0  12   13.90    2.30
   3   0  12   14.90    2.90
  -3   0  12   10.70    1.60
   3   0 -12   10.70    1.70
  -3   0 -12   17.00    3.40
  -4   0  12    7.90    1.70
   4   0  12    4.00    2.30
   4   0  12    6.20    1.70
   4   0  12    3.90    1.60
   4   0  12    2.50    2.30
   4   0  12    9.00    2.30
   5   0  12   39.10    4.70
  -5   0  12   33.80    3.10
   5   0 -12   37.00    3.80
   5   0  12   35.50    4.40
   5   0 -12   37.80   11.20
   5   0  12   36.80    3.70
   5   0  12   38.70    4.10
  -6   0  12  115.79    7.10
   6   0  12  106.89    8.60
   6   0  12  121.19    8.00
   6   0 -12  120.59    7.70
   6   0  12  101.99    7.60
   7   0 -12   73.69    5.00
  -7   0  12   77.39    4.70
   7   0  12   59.39    5.70
   7   0  12   70.49    5.00
   7   0  12   66.69    5.20
   8   0  12    1.40    0.80
   8   0 -12    1.70    0.60
   0  -1 -12    9.60    7.10
   0   1  12   12.60    1.70
   0   1 -12   11.50    3.50
   0  -1  12   13.20    1.60
   0   1  12   12.70    1.80
   1  -1  12  986.00   47.90
   1   1 -12  985.40   48.20
  -1  -1 -12  968.70   48.20
  -1   1  12  969.90   47.10
   1   1 -12  890.31   63.89
   1  -1  12 1067.39   48.50
  -1  -1  12 1006.80   47.60
  -1   1 -12  955.30   50.89
   1  -1 -12 1000.30   48.10
   1   1  12  955.10   49.10
  -1  -1  12  971.30   47.40
   1   1  12 1001.30   47.90
   1  -1 -12  909.81   64.29
   2   1 -12 1754.72  112.59
   2  -1  12 1928.51   95.29
  -2   1  12 2065.09   94.79
   2  -1  12 1839.02   95.99
   2   1 -12 1997.20   95.29
  -2  -1 -12 1900.81   95.29
   2  -1  12 2196.38   95.99
   2  -1 -12 1884.91  113.49
  -2  -1  12 2095.19   94.89
   2   1  12 2066.69   97.09
  -2   1 -12 1871.11   97.49
   2  -1 -12 1986.70   95.09
  -2  -1  12 2059.99   94.39
   3  -1  12  899.91   44.80
   3  -1  12  861.81   45.70
   3   1 -12  810.82   61.09
  -3   1  12  923.31   44.20
   3  -1  12  979.10   45.50
  -3  -1 -12  844.32   44.50
   3   1 -12  889.11   44.20
   3  -1 -12  856.41   61.49
   3   1  12  966.70   46.90
  -3  -1  12  925.71   44.30
   3   1  12  880.71   45.60
   3   1  12  884.81   44.80
   3  -1 -12  927.11   44.30
   3   1  12  971.00   46.10
   3   1  12  836.32   45.80
   4  -1  12  339.17   20.50
   4  -1  12  328.17   20.20
   4   1 -12  324.07   33.60
   4  -1  12  377.36   21.30
   4  -1  12  412.96   20.60
  -4   1  12  361.16   19.30
  -4  -1  12  381.36   19.40
   4  -1 -12  359.16   33.80
   4  -1 -12  363.26   19.90
   4   1  12  368.26   20.70
   4   1  12  395.46   22.10
   4   1  12  408.26   21.30
   5   1 -12  269.17   16.00
   5   1 -12  268.47   27.70
   5  -1  12  265.37   16.80
   5  -1  12  303.37   16.30
   5  -1  12  283.47   17.30
   5  -1  12  283.97   16.10
  -5   1  12  279.57   15.30
   5   1  12  272.27   17.60
   5   1  12  284.37   16.10
   5  -1 -12  282.07   15.80
  -5  -1  12  280.77   15.20
   5   1  12  300.57   15.10
   5  -1 -12  284.97   28.10
   5   1  12  274.87   17.10
   5   1  12  284.47   17.10
   6   1 -12   92.39    6.70
  -6   1  12  100.99    6.20
   6  -1  12   93.89    6.50
   6  -1  12   99.29    6.90
   6  -1  12   89.19    7.60
   6   1  12   82.69    6.60
   6   1  12   95.29    5.90
   6  -1 -12   93.49    6.40
   6   1  12   92.69    7.60
  -6  -1  12   95.49    6.00
   6   1  12   99.19    7.40
   7  -1  12  366.06   18.00
   7  -1  12  333.37   19.70
   7  -1  12  322.57   18.50
   7   1 -12  344.17   18.40
  -7   1  12  375.26   18.00
   7   1  12  363.96   17.50
  -7  -1  12  374.16   17.90
   7   1  12  299.27   19.10
   7  -1 -12  359.06   18.20
   8   1 -12  785.22   35.90
   8  -1  12  636.84   36.60
   8  -1 -12  771.62   35.70
   8   1  12  754.92   35.80
   0   2  12  149.88    9.70
   0  -2  12  145.99    8.20
   0   2 -12  143.09   11.70
   0   2  12  150.18    8.10
   0  -2 -12  130.89   19.10
   0   2 -12  124.69   19.00
   0   2  12  141.59    8.10
   0  -2  12  123.89    8.20
   0  -2 -12  130.39    9.70
   1   2 -12  118.79   11.30
   1  -2  12  120.89    7.80
  -1   2  12  128.69    7.70
   1   2 -12  131.19   19.40
   1  -2  12  137.79    8.10
  -1   2 -12  134.69   10.80
  -1  -2  12  136.39    7.70
   1  -2 -12  122.29   18.60
  -1  -2  12  146.09    7.80
   1   2  12  122.99    7.80
   2   2 -12  156.98    9.40
   2   2 -12  147.29   20.30
  -2  -2 -12  154.68    9.20
   2  -2  12  150.58    9.90
   2  -2  12  163.28    9.50
  -2   2  12  155.18    9.00
   2   2  12  159.28   11.00
  -2  -2  12  153.68    8.70
   2  -2 -12  154.88   20.60
   2   2  12  161.78    9.60
   2  -2 -12  152.78    9.10
  -2   2 -12  142.99   11.40
  -2  -2  12  157.58    8.90
   3  -2  12  752.82   37.80
   3   2 -12  740.83   37.00
   3  -2  12  744.33   37.40
   3   2 -12  685.63   54.29
  -3  -2 -12  714.03   37.00
  -3   2  12  789.52   37.00
   3  -2  12  748.33   38.60
   3   2  12  762.82   37.00
   3  -2 -12  750.52   36.70
   3   2  12  744.53   38.70
   3   2  12  722.63   38.10
   3   2  12  742.53   39.80
  -3  -2  12  767.42   36.90
   3  -2 -12  707.93   37.10
   3  -2 -12  740.63   54.39
  -3   2 -12  682.03   39.40
   3   2  12  764.92   38.00
  -3  -2  12  759.72   36.40
   4  -2  12  135.99    8.80
   4   2 -12  120.79   19.40
   4  -2  12  130.99    9.70
   4  -2  12  129.89    9.10
  -4   2  12  120.59    8.00
  -4  -2 -12  121.89    8.20
   4   2  12  140.89    9.40
   4   2  12  138.09   10.70
   4   2  12  140.29    9.50
   4  -2 -12  126.19    8.20
   4   2  12  138.49    9.80
   4  -2 -12  147.79   20.20
  -4  -2  12  138.49    8.10
   4   2  12  134.39    8.50
   5   2 -12  990.80   67.39
   5  -2  12 1049.70   52.89
   5   2 -12  998.50   51.89
  -5   2  12 1039.20   51.09
   5  -2  12 1067.19   53.49
  -5  -2  12 1029.60   50.89
   5   2  12 1014.10   52.69
   5   2  12 1017.80   54.39
   5   2  12 1031.10   52.89
   5   2  12 1059.49   50.99
   5   2  12 1067.29   53.29
   5  -2 -12 1038.60   51.19
   5  -2 -12 1091.29   67.59
   6   2 -12   55.99    4.70
  -6   2  12   57.69    4.30
   6  -2  12   58.99    4.90
   6  -2  12   67.99    6.40
   6   2  12   56.19    5.30
  -6  -2  12   59.89    4.20
   6   2  12   54.09    4.10
   6  -2 -12   54.99    4.30
   6   2  12   57.79    5.40
   7  -2  12   53.99    5.00
   7   2 -12   49.20    3.90
   7  -2  12   51.39    4.00
   7  -2 -12   51.39    3.50
   7   2  12   46.00    4.60
   7   2  12   48.10    3.60
  -7  -2  12   48.70    3.40
   8   2 -12   96.89    5.90
   8  -2  12   83.29    6.20
   8  -2 -12   90.39    5.10
   8   2  12   93.79    5.40
   0   3 -12   61.39    7.50
   0  -3 -12   67.79    4.90
   0   3 -12   55.39   13.80
   0  -3  12   67.29    4.50
   0   3  12   67.19    6.00
   0  -3  12   70.29    4.90
   0   3  12   70.79    4.70
  -1   3  12   15.90    1.90
  -1  -3 -12   16.70    2.10
   1   3 -12   19.50    9.20
   1  -3  12   14.40    2.10
   1   3  12   18.10    2.40
  -1   3 -12   15.00    3.70
  -1  -3  12   16.10    2.00
  -1  -3  12   16.10    1.80
   1   3  12   15.10    2.90
   1  -3 -12   23.50   10.00
   2   3 -12    1.80    1.10
   2   3 -12    2.20    5.70
  -2  -3 -12    2.40    1.00
  -2   3  12    1.60    0.80
   2   3 -12    1.70    2.10
   2  -3  12    2.00    1.00
   2   3  12    0.30    1.30
   2  -3 -12    0.90    0.80
  -2  -3  12    4.70    1.10
  -2  -3  12    2.60    1.10
   2   3  12    0.30    1.20
  -2   3 -12    2.00    2.00
  -3   3  12  152.68    9.00
   3   3 -12  145.99   20.80
  -3  -3 -12  146.19    9.00
   3  -3  12  149.69    9.30
   3  -3  12  157.08    9.60
   3  -3  12  133.99   11.60
   3   3 -12  142.89    8.80
  -3  -3  12  154.68    8.80
  -3  -3  12  156.38    8.60
  -3   3 -12  145.69   11.60
   3   3  12  152.58   10.60
   3   3  12  154.28   12.20
   3  -3 -12  126.09    8.50
   3  -3 -12  141.59   19.90
   3  -3 -12  141.69    8.40
   3   3  12  153.88    9.00
   3   3  12  145.39   10.10
  -4   3  12  276.77   15.40
   4   3 -12  253.77   29.00
   4  -3  12  295.27   16.60
   4  -3  12  311.87   16.20
  -4  -3 -12  266.37   15.30
   4  -3  12  280.77   17.30
   4   3  12  280.17   16.60
  -4   3 -12  263.57   18.30
   4  -3 -12  277.27   29.80
   4   3  12  302.87   15.70
   4   3  12  274.07   17.40
   4  -3 -12  277.67   15.20
   4   3  12  288.67   16.50
  -4  -3  12  300.77   15.40
   4   3  12  277.07   18.60
   5  -3  12  112.39    9.10
   5   3 -12   89.69   16.80
  -5   3  12  109.99    7.20
   5   3 -12  115.39    7.90
   5  -3 -12  115.59   17.30
   5   3  12  122.39    9.20
  -5  -3  12  107.89    7.00
   5  -3 -12  113.29    7.40
   6  -3  12   44.50    4.90
  -6   3  12   44.70    3.60
   6   3 -12   50.99    4.20
   6  -3  12   50.59    4.10
   6   3  12   44.50    3.50
   6   3  12   42.90    4.60
  -6  -3  12   42.70    3.40
   6  -3 -12   44.60    3.30
   7  -3  12   35.30    3.00
   7   3 -12   37.40    3.00
   7  -3  12   43.10    4.10
   7   3  12   29.60    3.30
   7  -3 -12   43.20    2.70
   7   3  12   34.70    2.60
  -7  -3  12   36.50    2.60
   0  -4  12  114.89    7.40
   0  -4  12  125.49    7.00
   0   4 -12  114.89   11.10
   0  -4 -12  116.59    7.40
   0   4  12  111.79    8.90
  -1  -4 -12  144.99    8.90
   1  -4  12  144.89    9.10
   1  -4  12  151.88    8.30
  -1   4  12  144.29   10.40
   1   4 -12  136.09   13.20
  -1  -4  12  151.88    8.60
   1  -4 -12  154.68   21.90
   1  -4 -12  152.88    8.90
  -1   4 -12  141.69   12.40
  -1  -4  12  147.29    8.80
   1   4  12  147.79   11.20
  -2   4  12   53.49    4.00
   2  -4  12   45.80    4.90
   2   4 -12   49.30    8.10
   2  -4  12   49.10    4.40
   2   4 -12   42.70   12.60
  -2  -4 -12   49.80    5.10
  -2   4 -12   52.69    6.60
   2  -4 -12   56.69   14.40
   2   4  12   41.00    5.70
  -2  -4  12   54.09    3.90
   2   4  12   52.19    4.10
   2  -4 -12   42.60    4.50
  -2  -4  12   50.59    4.00
   3   4 -12   21.80   10.50
   3  -4  12   25.50    3.50
   3  -4  12   19.80    2.80
   3  -4  12   26.70    3.40
  -3   4  12   28.90    2.80
  -3  -4 -12   26.40    2.80
  -3  -4  12   23.60    2.90
   3   4  12   25.30    2.80
   3  -4 -12   23.00    2.30
  -3  -4  12   22.90    2.40
   3  -4 -12   31.60   10.90
   3   4  12   22.40    4.70
   3   4  12   22.30    3.40
  -3   4 -12   23.10    4.50
   4  -4  12  233.68   13.50
   4   4 -12  219.88   26.70
  -4  -4 -12  228.58   12.70
   4  -4  12  236.68   14.20
  -4   4  12  213.38   12.70
   4  -4  12  234.68   14.70
   4   4  12  218.78   14.90
   4   4  12  241.48   13.20
   4  -4 -12  224.98   26.00
  -4  -4  12  233.78   12.70
   4   4  12  238.18   16.80
  -4   4 -12  215.08   16.00
   5  -4  12   41.50    4.00
   5   4 -12   46.10    4.20
   5  -4  12   48.90    5.30
  -5  -4  12   44.40    3.60
   5  -4 -12   47.80   18.50
   5   4  12   48.30    5.30
   5   4  12   44.40    3.90
   6  -4  12  201.98   12.10
   6   4 -12  221.48   12.00
   6  -4  12  214.18   13.50
  -6  -4  12  209.98   11.40
   6   4  12  212.58   11.70
   6   4  12  209.38   13.20
   7  -4  12  170.78   10.00
   7   4 -12  177.48    9.10
   7  -4  12  148.69    8.90
  -7  -4  12  156.98    8.40
   7   4  12  156.38    9.60
   7   4  12  157.98    8.40
   0  -5  12    1.00    0.70
   0  -5  12    0.10    1.10
   0  -5 -12    3.10    1.00
   0   5 -12    1.50    2.10
   0   5  12    3.30    2.50
  -1  -5 -12  217.38   12.70
   1   5 -12  229.78   19.00
  -1   5  12  232.38   15.00
   1  -5  12  236.78   12.10
   1   5 -12  189.78   31.10
   1  -5  12  235.88   13.30
   1  -5 -12  238.88   12.70
  -1  -5  12  235.18   12.50
   1  -5 -12  224.68   30.50
  -1   5 -12  217.58   17.10
   1   5  12  228.28   15.60
  -1  -5  12  218.28   12.80
   2   5 -12 1231.98   68.69
  -2   5  12 1263.67   62.39
   2  -5  12 1179.38   61.29
  -2  -5 -12 1221.78   59.99
   2  -5  12 1217.38   60.59
  -2  -5  12 1271.17   59.69
   2   5  12 1188.18   62.09
   2  -5 -12 1065.99   87.69
   2   5  12 1296.47   60.29
   2  -5 -12 1253.37   59.69
  -2   5 -12 1228.08   65.09
  -2  -5  12 1259.97   60.09
   3  -5  12  430.06   23.40
   3   5 -12  398.76   39.90
   3  -5  12  430.36   22.10
   3  -5  12  385.46   24.20
  -3  -5 -12  420.76   21.60
  -3   5  12  375.86   25.30
   3   5 -12  404.26   21.30
  -3   5 -12  369.46   27.40
  -3  -5  12  392.56   22.80
  -3  -5  12  413.76   21.40
   3   5  12  422.36   28.30
   3   5  12  442.76   22.10
   3  -5 -12  430.16   20.90
   3  -5 -12  455.35   40.50
  -4  -5 -12  219.38   12.30
   4  -5  12  221.28   14.40
   4  -5  12  222.88   13.10
   4   5 -12  239.18   13.20
   4  -5 -12  231.98   34.20
   4   5  12  227.38   14.70
  -4   5 -12  206.68   16.10
   4   5  12  232.48   13.00
  -4  -5  12  224.68   12.40
   5   5 -12  343.37   17.50
  -5  -5 -12  298.97   16.60
   5  -5  12  307.27   17.60
   5  -5  12  323.87   19.00
   5   5  12  317.27   19.40
  -5  -5  12  342.37   17.10
   5   5  12  345.57   17.50
   6   5 -12  242.88   12.30
   6  -5  12  218.68   12.40
   6  -5  12  237.98   14.00
  -6  -5  12  230.88   12.00
   6   5  12  212.28   13.70
   7  -5  12  199.78   11.00
   7  -5  12  211.18   12.20
   7   5  12  234.48   10.90
   0  -6  12  255.17   13.40
   0  -6 -12  244.58   13.70
   0   6  12  245.68   16.70
   0  -6  12  261.87   14.60
   0   6 -12  243.08   20.20
   1  -6  12   22.90    2.00
  -1   6  12   15.50    5.00
   1   6 -12   18.40    6.00
   1  -6  12   17.30    3.30
  -1  -6 -12   23.00    2.40
   1  -6 -12   20.10    2.20
  -1   6 -12   15.20    5.00
  -1  -6  12   22.40    2.20
  -1  -6  12   19.00    3.30
   1   6  12   10.90    4.80
   2  -6  12    8.20    2.40
  -2  -6 -12   15.50    1.90
   2   6 -12   19.80   13.90
   2  -6  12    8.70    2.20
   2  -6 -12   12.90    1.60
   2   6  12   12.60    1.90
  -2  -6  12   12.40    3.20
   2   6  12   11.70    2.40
   2  -6 -12   20.90   13.70
  -2  -6  12   11.10    1.60
   2   6  12   11.50    4.10
  -2   6 -12    7.30    3.40
  -3  -6 -12  207.08   11.30
   3  -6  12  198.98   11.70
   3  -6  12  197.88   13.20
   3   6  12  211.68   11.90
  -3   6 -12  183.08   15.10
   3   6  12  204.88   13.40
  -3  -6  12  202.58   11.20
   3  -6 -12  196.48   10.50
   4   6 -12   27.10    2.50
  -4  -6 -12   19.70    2.10
   4  -6  12   25.40    3.40
   4  -6  12   19.80    2.40
  -4  -6  12   18.10    2.10
   4   6  12   21.90    3.10
  -4   6 -12   16.00    5.80
   4   6  12   20.50    2.50
   5  -6  12    6.90    2.10
   5  -6  12    7.40    1.30
   5   6 -12    8.70    1.30
   5   6  12    7.20    1.40
   5   6  12    5.50    1.60
  -5  -6  12    5.30    1.20
   6  -6  12  289.87   15.90
   6  -6  12  276.87   14.40
  -6  -6  12  291.57   14.20
   6   6  12  312.27   14.60
   6   6  12  235.98   15.20
   0  -7  12  285.87   14.70
   0   7 -12  277.77   21.20
   1   7 -12  201.88   17.90
   1   7 -12  215.28   12.30
  -1  -7 -12  239.68   12.40
   1  -7 -12  229.08   12.10
  -1  -7  12  222.78   12.00
   1   7  12  229.58   14.00
  -1   7 -12  215.08   17.40
   2   7 -12   37.30    7.30
   2  -7  12   44.00    4.50
   2   7 -12   45.70    3.60
   2   7 -12   41.80    3.80
  -2  -7 -12   41.30    3.50
   2   7  12   52.79    4.10
   2  -7 -12   53.89    3.40
   2   7  12   44.90    4.60
  -2  -7  12   43.90    3.40
  -2   7 -12   37.80    6.70
   3   7 -12  268.27   13.50
   3  -7  12  263.77   15.30
   3  -7  12  269.67   14.00
  -3  -7 -12  254.77   13.60
  -3  -7  12  250.27   13.50
   3   7  12  263.87   14.20
  -3   7 -12  225.38   17.70
   3   7  12  239.18   15.10
   4  -7  12  261.97   15.20
   4  -7  12  287.67   16.00
  -4  -7 -12  288.17   14.40
   4   7  12  276.47   15.20
  -4  -7  12  288.37   14.40
   4   7  12  251.87   16.80
   5  -7  12  137.09    8.40
  -5  -7 -12  123.89    6.90
   5  -7  12  119.59    7.10
  -5  -7  12  146.49    7.30
   5   7  12  122.79    8.50
   5   7  12  139.39    7.70
   0   8 -12  106.99    6.90
   0  -8 -12  113.99    6.80
   0   8 -12  117.99   11.70
   0   8  12  116.99    7.80
   0  -8  12  121.89    6.40
   1  -8  12  129.89    8.30
   1   8 -12   99.59   11.30
  -1  -8 -12  110.69    6.70
  -1   8  12  110.09    8.30
   1  -8 -12  116.39    6.50
   1   8  12  107.49    7.50
   1   8  12  119.29    7.20
  -1   8 -12   98.39   10.50
  -2  -8 -12  118.79    6.80
   2  -8  12  122.19    8.00
   2   8  12  110.09    7.10
  -2  -8  12  107.09    6.50
   2  -8 -12  119.49    6.10
   2   8  12  107.39    7.50
   3  -8  12  158.88    9.70
  -3  -8 -12  146.89    8.30
   3   8  12  154.28    9.20
   3   8  12  156.58    8.80
  -3  -8  12  142.89    8.20
  -4  -8 -12   52.99    3.40
   4   8  12   55.69    3.90
   4   8  12   54.39    3.70
  -4  -8  12   61.09    3.90
   0  -9 -12   88.69    4.90
   0  -9  12   80.79    5.70
   0   9  12   90.99    5.40
   1   9 -12   75.89    4.40
   1  -9  12   97.89    5.80
  -1  -9 -12   83.99    4.80
   1   9  12   67.19    5.00
  -1  -9  12   80.09    4.40
   1  -9 -12   86.39    4.70
   1   9  12   86.09    5.20
  -2  -9 -12   77.09    4.60
   2  -9  12   80.69    5.60
  -2  -9  12   76.39    4.50
   2   9  12   80.29    4.90
   3  -9  12   63.29    4.30
   3   9  12   67.69    4.00
  -3  -9  12   63.39    3.60
   0   0  13    1.90    0.90
   0   0 -13    1.20    0.90
   0   0 -13   -2.20    7.50
   0   0  13    6.20    1.80
   1   0  13    6.10    1.30
  -1   0  13    5.50    1.30
  -1   0 -13    4.30    1.20
   1   0  13    5.10    1.70
   1   0 -13    8.80    6.70
   1   0  13    9.00    1.80
   2   0  13   -0.70    0.80
   2   0 -13    1.00    0.70
   2   0  13    3.30    1.50
   2   0  13    1.40    1.60
  -2   0 -13    3.10    1.00
   2   0 -13    0.60    6.10
   2   0  13    1.40    1.30
  -2   0  13    1.80    0.70
   3   0  13  324.07   17.30
  -3   0  13  321.47   16.90
   3   0  13  311.47   17.90
   3   0  13  322.77   18.40
   3   0  13  338.67   18.40
   3   0 -13  272.57   30.90
  -3   0 -13  308.17   17.40
   3   0  13  340.57   18.90
   3   0 -13  321.67   17.00
   4   0  13  800.02   41.20
  -4   0  13  718.33   36.20
   4   0  13  734.83   38.10
   4   0 -13  675.43   54.89
   4   0 -13  687.03   37.00
  -4   0 -13  677.93   36.60
   4   0  13  782.22   37.90
   4   0  13  722.03   37.80
   5   0  13   58.89    6.10
   5   0  13   66.99    6.00
  -5   0  13   64.19    4.60
   5   0  13   63.89    5.40
   5   0  13   57.19    5.00
   5   0 -13   56.49    5.00
   5   0 -13   56.59   13.60
   6   0  13   10.60    2.30
  -6   0  13    7.70    1.60
   6   0 -13   11.40    2.00
   6   0  13    9.70    1.80
   6   0  13    6.10    1.60
   7   0 -13  569.74   27.00
   7   0  13  487.55   26.50
  -7   0  13  524.15   26.30
   8   0 -13  206.78   10.50
   0  -1  13  119.29    7.00
   0   1  13  123.09    7.10
   0   1  13  126.49    8.60
   0   1 -13  112.49   10.20
   0  -1 -13  128.19   20.40
   0   1 -13  100.19   17.90
   0   1 -13  121.29    7.80
   0   1  13  116.69    7.20
   0  -1 -13  121.49    7.60
   0  -1  13  120.89    7.30
   1  -1  13  133.79    8.50
  -1   1  13  121.79    7.10
   1  -1  13  121.89    7.10
   1   1 -13  125.39    8.00
   1   1 -13  102.39   19.20
   1  -1  13  118.39    7.70
  -1   1  13  128.79    7.50
  -1  -1 -13  133.79    8.10
   1   1  13  125.99    8.90
   1  -1 -13  131.89    7.90
  -1  -1  13  134.09    7.50
  -1  -1  13  125.79    7.60
   1   1  13  121.19    7.70
  -1   1 -13  118.69   10.10
   1  -1 -13  109.49   19.20
   1   1  13  124.39    7.30
  -2   1  13  241.68   12.40
   2  -1  13  218.88   12.90
   2   1 -13  198.88   25.60
   2   1 -13  234.08   12.80
  -2  -1 -13  233.68   12.90
   2  -1  13  218.28   13.40
   2  -1  13  182.38   16.30
   2  -1 -13  201.18   25.90
   2  -1 -13  221.68   12.50
  -2  -1  13  222.68   12.30
   2   1  13  243.18   13.80
   2   1  13  229.38   13.00
  -2  -1  13  235.18   12.00
   2   1  13  233.48   14.30
  -3   1  13  900.41   43.50
   3  -1  13  938.81   44.60
   3   1 -13  855.71   43.40
   3   1 -13  773.42   61.59
   3  -1  13  821.02   44.30
   3  -1  13  848.62   44.90
  -3  -1 -13  878.31   43.90
   3  -1  13  889.91   43.80
  -3   1 -13  863.01   44.00
   3  -1 -13  878.51   63.09
   3  -1 -13  886.21   43.40
  -3  -1  13  909.41   43.50
   3   1  13  934.11   46.30
   3   1  13  939.11   45.30
   3   1  13  869.51   44.50
   3   1  13  877.61   44.80
   4  -1  13  423.26   23.40
   4  -1  13  444.96   22.90
  -4  -1 -13  394.66   22.00
   4  -1  13  413.46   23.70
   4  -1  13  431.96   22.50
  -4   1  13  413.66   21.90
   4   1  13  424.76   23.50
   4   1  13  432.16   23.60
   4   1  13  420.76   23.40
  -4   1 -13  406.36   22.20
   4  -1 -13  409.26   22.50
   4   1  13  428.66   24.60
   4   1  13  431.76   22.60
  -4  -1  13  447.16   22.10
   4  -1 -13  429.86   53.89
   5   1 -13  238.68   26.90
  -5   1  13  273.67   15.00
   5  -1  13  277.87   15.50
   5  -1  13  287.97   15.80
   5  -1  13  264.27   16.70
   5   1 -13  271.87   15.70
  -5  -1  13  275.57   14.90
   5   1  13  280.47   16.50
   5   1  13  281.57   17.00
   5  -1 -13  303.07   28.80
   5   1  13  264.17   16.50
   5  -1 -13  279.87   15.40
  -6   1  13  250.97   13.90
   6   1 -13  250.97   14.40
   6  -1  13  247.68   14.40
   6  -1  13  240.18   15.50
   6   1  13  272.37   15.10
  -6  -1  13  267.17   13.80
   6   1  13  259.37   15.50
   6  -1 -13  262.17   14.20
   7   1 -13   69.89    4.90
   7  -1  13   62.99    4.60
  -7   1  13   66.79    4.70
   7  -1  13   61.19    5.40
   7   1  13   66.39    4.80
  -7  -1  13   66.39    4.70
   7  -1 -13   71.89    4.50
   7   1  13   62.29    5.10
   0   2  13 1057.49   51.09
   0   2  13 1006.50   52.89
   0   2 -13 1013.70   55.99
   0   2  13 1071.79   51.09
   0  -2  13 1068.99   50.89
   0  -2  13 1026.80   51.19
   0  -2 -13 1079.59   51.59
  -1  -2 -13  229.78   12.40
   1  -2  13  207.88   12.10
   1   2 -13  208.88   26.80
  -1   2  13  222.78   11.90
   1  -2  13  232.98   11.70
   1  -2  13  178.28   14.80
   1   2 -13  224.48   12.50
   1   2 -13  209.68   16.50
  -1  -2  13  226.28   11.90
   1   2  13  210.58   13.70
   1   2  13  219.28   12.20
  -1   2 -13  206.78   15.30
   1   2  13  187.18   12.20
   1  -2 -13  223.98   26.90
   1  -2 -13  221.18   12.20
  -1  -2  13  226.98   11.90
  -2  -2 -13  113.79    7.50
   2   2 -13  115.69    7.60
   2   2 -13  125.19   19.60
   2  -2  13  113.99    8.20
   2  -2  13  106.89    7.60
   2  -2 -13  122.89    7.50
  -2  -2  13  110.69    7.10
   2   2  13  122.59    8.10
   2   2  13  122.99    9.40
  -2  -2  13  125.49    7.20
   2  -2 -13  115.99   18.00
  -2   2 -13  116.09    9.90
   3   2 -13  414.06   40.60
   3  -2  13  490.75   24.70
  -3   2  13  463.95   24.20
   3  -2  13  431.86   29.70
   3  -2  13  462.55   25.10
  -3  -2 -13  491.45   24.60
   3   2 -13  502.65   24.40
  -3  -2  13  474.55   24.20
   3   2  13  463.15   32.90
   3   2  13  488.15   25.90
   3  -2 -13  488.05   24.10
   3  -2 -13  504.25   47.50
   3   2  13  502.75   26.20
   3   2  13  461.45   25.30
  -3   2 -13  435.06   27.20
   3  -2 -13  459.65   24.50
   4  -2  13  426.06   22.70
  -4   2  13  416.36   22.20
   4  -2  13  423.86   23.60
   4  -2  13  402.26   23.90
  -4  -2 -13  411.46   22.30
   4   2 -13  391.96   38.20
   4   2  13  426.86   23.50
  -4  -2  13  431.56   22.10
   4   2  13  433.96   25.40
   4  -2 -13  441.76   38.90
   4   2  13  426.86   23.60
   4  -2 -13  424.06   22.40
   4   2  13  455.15   22.10
   4   2  13  453.05   24.30
  -5   2  13  159.08    9.80
   5   2 -13  134.89   19.90
   5  -2  13  148.19   10.90
   5  -2  13  149.29   10.00
   5   2 -13  148.09    9.80
   5   2  13  140.69   11.90
  -5  -2  13  167.98    9.80
   5  -2 -13  150.28   19.90
   5   2  13  145.29   10.80
   5   2  13  164.48    9.00
   5  -2 -13  163.18   11.10
   6  -2  13  216.68   14.40
   6  -2  13  236.98   13.20
   6   2 -13  223.58   13.20
  -6   2  13  239.78   12.70
   6  -2 -13  229.78   12.60
   6   2  13  235.78   14.10
   6   2  13  227.48   12.60
  -6  -2  13  244.98   12.50
   6   2  13  223.28   13.70
   7  -2  13   37.10    3.80
   7  -2  13   36.60    3.10
   7   2 -13   37.70    3.10
   7   2  13   38.50    3.40
  -7  -2  13   42.50    2.80
   0  -3  13  552.14   26.70
   0   3  13  537.55   29.20
   0   3 -13  483.15   31.60
   0   3  13  540.85   26.80
   0  -3  13  538.75   27.20
   1   3 -13 1265.27   68.49
   1  -3  13 1229.18   62.19
   1  -3  13 1220.38   62.89
   1  -3  13 1357.56   61.39
  -1   3  13 1292.17   61.99
  -1  -3 -13 1303.57   62.39
  -1   3  13 1388.76   64.99
   1   3 -13 1184.68   83.59
  -1  -3  13 1235.68   61.89
  -1  -3  13 1319.57   61.79
  -1   3 -13 1165.48   66.39
   1   3  13 1236.28   64.59
   1   3  13 1284.17   62.19
   1  -3 -13 1258.67   62.19
   1  -3 -13 1333.77   86.39
   2  -3  13  870.81   43.60
   2   3 -13  788.72   61.49
  -2  -3 -13  873.71   42.50
   2  -3  13  759.12   45.10
  -2   3  13  870.41   43.60
   2   3 -13  877.61   42.60
   2   3  13  893.21   42.20
  -2  -3  13  868.71   42.00
  -2   3 -13  808.22   46.10
   2  -3 -13  864.11   42.30
  -2  -3  13  827.82   43.20
   2   3  13  838.32   48.70
   2  -3 -13  915.91   64.89
   2   3  13  836.62   42.70
  -3   3  13  627.24   31.60
   3   3 -13  616.34   31.50
   3  -3  13  627.04   33.20
   3   3 -13  549.35   49.50
   3  -3  13  640.04   32.30
   3  -3  13  656.33   32.60
  -3  -3 -13  619.64   31.70
  -3  -3  13  611.94   31.20
   3  -3 -13  621.14   31.10
   3   3  13  671.13   31.70
   3   3  13  601.84   32.40
   3   3  13  640.64   33.60
   3  -3 -13  641.74   50.69
   3   3  13  628.34   35.20
  -3   3 -13  584.44   35.30
  -4   3  13  107.49    7.00
   4  -3  13   86.49    9.10
  -4  -3 -13   97.49    6.80
   4  -3  13  108.39    7.30
   4  -3  13  113.09    8.40
   4   3 -13   94.49   18.60
   4  -3 -13  121.19   19.50
   4   3  13  110.99    7.70
   4   3  13  110.69    8.60
   4   3  13  117.39   10.60
   4  -3 -13   94.49    6.50
   4   3  13  110.99    7.00
   4   3  13   99.69   12.00
  -4  -3  13  111.09    6.90
  -5   3  13  204.58   11.30
   5   3 -13  201.98   12.00
   5   3 -13  166.48   23.40
   5  -3  13  178.18   11.50
   5  -3  13  203.48   13.20
   5   3  13  202.38   11.10
   5  -3 -13  199.88   10.90
   5   3  13  193.78   12.00
  -5  -3  13  195.98   11.10
   5  -3 -13  202.48   22.90
   5   3  13  208.18   13.20
   6   3 -13  178.98   10.80
   6  -3  13  177.48   10.70
   6  -3  13  177.48   12.10
   6  -3 -13  191.28    9.90
  -6  -3  13  187.68   10.20
   6   3  13  191.58   10.10
   6   3  13  190.28   11.90
   7   3 -13  167.98    9.00
   7  -3  13  151.98    8.90
   7  -3  13  165.38   10.00
  -7  -3  13  170.68    8.60
   7   3  13  149.99    9.40
   0   4  13   36.30    4.70
   0  -4  13   29.40    3.60
   0  -4  13   31.80    3.30
   0   4 -13   30.20    7.20
   0  -4 -13   35.80    3.30
  -1  -4 -13  254.57   14.30
   1  -4  13  255.97   13.40
  -1   4  13  262.77   16.20
   1   4 -13  238.88   19.40
   1  -4  13  244.88   14.40
   1   4 -13  242.78   31.30
   1  -4 -13  271.07   32.80
   1  -4 -13  275.17   14.30
   1   4  13  268.87   17.10
  -1  -4  13  256.87   13.80
  -1  -4  13  253.67   14.20
  -1   4 -13  251.07   18.60
   2  -4  13 1580.34   79.39
   2   4 -13 1540.55  102.19
  -2  -4 -13 1629.74   78.29
  -2   4  13 1629.84   80.59
   2   4 -13 1660.13   78.49
   2   4 -13 1594.94   86.19
   2  -4  13 1544.05   78.59
  -2   4  13 1579.44   77.99
   2  -4 -13 1707.33  103.99
   2   4  13 1767.42   78.19
  -2  -4  13 1603.74   77.99
   2  -4 -13 1581.64   77.79
  -2   4 -13 1528.75   82.69
   2   4  13 1580.74   81.99
   2   4  13 1612.74   80.29
   3   4 -13  925.41   45.40
  -3  -4 -13  967.50   45.80
   3  -4  13  891.81   47.20
  -3   4  13  964.90   45.70
   3  -4  13  919.31   46.50
   3   4 -13  832.92   65.99
   3  -4  13  965.40   46.00
   3   4  13  899.11   47.80
   3   4  13  980.60   45.80
   3  -4 -13  961.30   67.29
   3  -4 -13  916.71   44.90
  -3  -4  13  913.61   45.50
  -3  -4  13  948.51   45.40
   3   4  13  851.11   49.30
  -3   4 -13  853.81   49.50
  -4  -4 -13   57.49    4.50
   4  -4  13   65.39    6.00
   4  -4  13   63.49    4.90
   4   4 -13   86.69   16.60
  -4   4  13   58.39    4.60
   4   4 -13   65.29    5.30
   4   4  13   68.49    6.60
  -4  -4  13   61.29    4.60
  -4   4 -13   57.39    8.10
   4  -4 -13   57.59   14.10
   4   4  13   53.99    5.30
   5  -4  13  109.09    7.20
   5  -4  13  112.39    8.40
  -5  -4 -13   88.59    7.60
   5   4 -13  117.19    7.50
   5   4  13  114.79    7.00
   5   4  13  106.59    8.50
  -5  -4  13  110.79    6.80
   6  -4  13   72.19    6.20
   6  -4  13   76.19    5.20
  -6  -4  13   79.19    4.90
   6   4  13   79.39    4.90
   6   4  13   82.69    6.40
   7  -4  13   18.00    2.20
   7  -4  13   18.20    1.60
   7   4 -13   21.40    2.10
   7   4  13   19.30    2.10
  -7  -4  13   15.40    1.40
   0   5 -13   84.99   10.20
   0  -5 -13   98.19    6.30
   0  -5  13   90.39    5.80
   0   5  13   88.99    8.40
   0  -5  13   94.89    6.70
   1  -5  13 1248.38   59.39
  -1  -5 -13 1232.08   60.39
   1   5 -13 1205.98   67.99
  -1   5  13 1243.98   63.19
   1  -5  13 1276.97   60.99
   1   5  13 1194.08   63.79
  -1  -5  13 1239.58   59.89
  -1   5 -13 1118.89   65.79
   1  -5 -13 1276.97   60.19
  -1  -5  13 1281.67   60.59
  -2   5  13  616.84   34.40
   2   5 -13  564.54   51.29
  -2  -5 -13  623.64   30.70
   2   5 -13  620.44   30.90
   2   5 -13  670.43   41.60
   2  -5  13  614.54   32.00
  -2  -5  13  613.74   31.50
   2   5  13  559.04   32.50
   2   5  13  620.84   30.80
   2  -5 -13  600.64   30.30
   2  -5 -13  593.64   52.39
  -2   5 -13  560.84   37.40
   2   5  13  578.34   35.40
   3   5 -13  350.46   18.60
   3  -5  13  376.56   19.10
   3   5 -13  311.57   37.30
  -3  -5 -13  348.47   19.00
   3  -5  13  383.46   20.70
   3   5  13  375.26   19.60
   3  -5 -13  356.36   18.90
  -3  -5  13  358.76   18.60
  -3   5 -13  340.87   24.50
   3  -5 -13  311.37   39.50
   4  -5  13  678.43   37.90
   4  -5  13  745.03   36.60
   4   5 -13  764.62   36.80
  -4  -5 -13  755.22   36.00
  -4   5 -13  640.04   40.20
   4   5  13  718.53   38.70
   4   5  13  741.73   36.50
  -4  -5  13  750.62   36.10
   5   5 -13   15.10    1.90
  -5  -5 -13   12.30    1.50
   5  -5  13   14.60    1.70
   5  -5  13   12.00    2.40
   5   5  13   12.10    1.70
  -5  -5  13   11.10    1.50
   5   5  13   10.40    2.30
   6  -5  13   38.40    3.80
   6  -5  13   35.90    3.10
   6   5 -13   48.60    4.00
  -6  -5  13   40.90    2.90
   6   5  13   43.30    4.00
   6   5  13   40.20    2.80
   0  -6  13  430.56   20.80
   0   6 -13  377.66   27.10
   0  -6  13  419.66   22.90
   0  -6 -13  432.96   21.30
   0   6  13  363.66   28.60
   1   6 -13  130.89   13.80
  -1  -6 -13  149.09    8.80
  -1  -6  13  154.58    8.60
   1  -6 -13  147.39    8.70
  -1   6 -13  148.89   13.60
   2  -6  13  733.53   37.70
   2   6 -13  710.53   36.20
  -2  -6 -13  743.43   36.20
   2   6 -13  693.03   43.60
   2  -6 -13  751.42   35.80
   2   6  13  791.82   36.60
  -2   6 -13  688.83   41.60
   2   6  13  669.03   38.10
  -3  -6 -13  415.56   21.20
   3   6 -13  437.16   21.70
   3  -6  13  428.26   21.50
   3  -6  13  410.46   22.80
  -3  -6  13  405.16   21.10
   3   6  13  389.96   23.30
  -3   6 -13  378.66   25.70
   3   6  13  434.36   21.70
   3  -6 -13  393.36   20.30
   4  -6  13  523.65   27.00
   4  -6  13  465.05   25.00
   4   6 -13  526.25   25.30
  -4  -6 -13  478.65   24.80
   4   6  13  470.85   26.90
   4   6  13  500.45   25.40
  -4  -6  13  500.65   25.00
   5  -6  13  412.46   21.90
   5   6 -13  424.86   20.10
  -5  -6 -13  378.86   19.70
   5  -6  13  362.66   21.00
   5   6  13  396.76   21.70
   5   6  13  395.46   20.30
  -5  -6  13  420.96   20.20
  -6  -6  13  444.66   21.30
   6   6  13  402.86   21.30
   6   6  13  464.55   23.50
   0   7 -13   11.70    4.30
   0  -7 -13    9.90    1.50
   0  -7  13   11.90    1.40
   1   7 -13  180.78   15.90
   1  -7  13  194.98   11.70
  -1  -7 -13  191.58   10.50
   1  -7 -13  179.18   10.20
   1   7  13  183.38   11.90
  -1  -7  13  190.18   10.20
  -1   7 -13  170.58   15.20
   1   7  13  187.18   10.70
  -2  -7 -13  267.37   13.60
   2  -7  13  244.78   14.70
   2   7 -13  258.97   13.40
   2   7  13  265.07   13.90
   2   7  13  248.68   15.10
  -2   7 -13  212.08   19.90
  -2  -7  13  248.18   13.30
   3  -7  13  262.77   15.80
   3   7 -13  293.47   14.70
  -3  -7 -13  277.57   14.40
   3   7  13  256.97   15.70
  -3  -7  13  273.97   14.30
   3   7  13  273.47   14.80
   4  -7  13   36.40    3.60
  -4  -7 -13   37.00    2.70
   4   7  13   36.20    3.00
  -4  -7  13   35.80    2.70
   4   7  13   38.00    3.60
   5  -7  13  281.87   14.80
  -5   7 -13  256.97   13.90
   5   7  13  274.87   15.10
  -5  -7  13  282.97   13.70
   5   7  13  261.47   13.70
   0  -8 -13  108.39    6.30
   0   8  13  106.19    7.20
   0  -8  13  109.39    5.80
  -1   8  13  193.98   11.70
   1   8 -13  214.38   11.10
  -1  -8 -13  202.48   11.00
   1  -8  13  199.98   12.00
   1   8  13  193.98   11.80
  -1  -8  13  213.38   10.60
   1   8  13  210.68   11.70
   2  -8  13  140.69    8.50
  -2  -8 -13  138.39    7.50
   2   8  13  137.39    7.80
  -2  -8  13  125.79    7.20
   2   8  13  121.69    8.10
   2  -8 -13  125.69    6.80
   3  -8  13   16.80    2.20
  -3  -8 -13   16.60    1.60
   3   8  13   16.80    2.00
   3   8  13   15.90    1.90
  -3  -8  13   21.10    1.70
  -4  -8 -13  100.49    5.30
   4   8  13  105.09    5.60
   4   8  13   88.29    5.60
   0   9 -13  130.19    7.50
   0  -9  13  138.39    8.00
   0   9  13  148.59    7.60
   0  -9 -13  132.19    7.20
  -1   9  13  111.19    6.00
  -1  -9 -13  104.39    5.70
   1  -9  13  110.59    6.50
  -1  -9  13   92.39    6.10
   1   9  13  104.19    6.10
   2  -9  13   80.39    5.20
  -2  -9 -13   83.09    4.50
  -2  -9  13   71.99    4.30
  -2  -9  13   80.29    4.80
   2   9  13   83.79    4.70
   0   0 -14  117.19    7.50
   0   0  14  106.89    8.00
   0   0  14  114.69    6.80
   0   0  14  111.19    7.10
   1   0  14  193.78   11.90
   1   0  14  178.98   10.20
  -1   0  14  188.98   10.40
   1   0 -14  191.28   11.10
  -1   0  14  185.98   10.70
   1   0  14  189.28   10.90
   1   0 -14  179.28   26.00
  -1   0 -14  183.98   11.10
   2   0  14 1420.26   66.69
  -2   0  14 1399.26   65.29
   2   0 -14 1360.16   65.59
   2   0 -14 1228.68   87.09
   2   0  14 1360.06   67.09
   2   0  14 1285.17   65.99
  -2   0 -14 1334.67   65.89
   3   0 -14  101.09    6.60
   3   0  14   95.69    8.20
   3   0 -14   95.29   19.20
   3   0  14  104.89    7.70
   3   0  14   99.39    7.70
  -3   0 -14  105.89    9.30
  -3   0  14  113.09    6.70
   3   0  14  107.19   10.00
   4   0  14 1771.72   79.69
   4   0 -14 1526.05   78.89
  -4   0  14 1604.14   78.19
   4   0 -14 1543.15   99.69
   4   0  14 1673.93   78.69
  -4   0 -14 1628.04   78.49
   4   0  14 1557.04   79.79
   4   0  14 1592.94   79.89
   5   0  14  349.57   19.10
   5   0  14  331.17   18.40
   5   0 -14  336.37   18.70
   5   0  14  332.07   19.60
  -5   0  14  355.96   18.10
   6   0  14  209.88   13.80
   6   0 -14  237.78   13.00
   6   0  14  239.28   13.70
  -6   0  14  233.28   12.50
  -7   0  14   69.69    4.30
   7   0  14   64.89    5.10
   7   0 -14   75.29    4.60
   7   0  14   64.59    4.40
   0   1  14   -0.40    1.10
   0   1 -14    0.70    0.90
   0  -1  14    0.00    0.90
   0  -1 -14    0.90    0.70
   0  -1  14   -1.60    1.10
   0   1  14    0.50    0.70
   0   1  14    2.70    1.40
   1   1 -14   59.59    4.60
   1   1 -14   42.40   13.10
  -1  -1 -14   49.20    4.30
   1  -1  14   42.50    4.40
  -1   1  14   47.50    3.80
   1  -1  14   55.49    4.80
   1  -1  14   50.89    3.60
  -1  -1  14   51.59    3.80
   1  -1 -14   51.59    4.20
  -1  -1  14   51.89    4.10
  -1   1 -14   49.60    4.20
   1   1  14   54.99    3.80
   1   1  14   43.80    5.80
   1   1  14   49.00    4.20
   1  -1 -14   55.39   14.80
  -2  -1 -14  270.57   14.90
   2   1 -14  223.78   28.50
   2  -1  14  257.67   15.00
   2   1 -14  262.57   14.80
   2  -1  14  252.47   15.30
  -2   1  14  274.37   14.40
   2   1  14  280.87   16.60
   2  -1 -14  270.77   14.70
   2   1  14  269.27   15.10
   2   1  14  292.27   15.90
   2  -1 -14  258.97   31.10
  -2  -1  14  264.67   14.40
  -2   1 -14  259.37   14.90
   3  -1  14  438.26   24.30
  -3   1  14  459.95   22.90
  -3  -1 -14  457.45   23.30
   3   1 -14  440.26   22.80
   3  -1  14  432.06   23.90
   3   1 -14  374.56   38.70
   3   1  14  465.65   24.50
   3  -1 -14  445.46   41.10
   3   1  14  412.66   23.80
   3   1  14  465.85   25.60
   3  -1 -14  446.56   22.70
  -3  -1  14  445.96   22.80
   3   1  14  439.56   24.00
  -3   1 -14  442.66   23.30
   4  -1  14  219.48   13.50
   4  -1  14  215.08   13.50
  -4   1  14  223.58   12.10
   4  -1  14  218.08   12.20
   4   1 -14  195.58   26.50
  -4  -1 -14  195.38   11.90
   4  -1 -14  198.98   12.20
   4   1  14  212.98   13.50
   4   1  14  223.18   13.40
   4   1  14  205.88   13.10
  -4  -1  14  202.88   11.80
   4   1  14  197.88   14.30
   4  -1 -14  214.88   26.40
  -4   1 -14  212.78   12.20
  -5   1  14  454.55   22.60
   5  -1  14  424.46   22.80
   5  -1  14  434.96   24.40
   5   1 -14  424.46   23.20
   5   1  14  415.86   24.00
  -5  -1  14  436.16   22.40
   5  -1 -14  438.56   22.90
   5  -1 -14  462.65   50.89
   6   1 -14    3.70    1.20
   6  -1  14    2.70    1.10
  -6   1  14    3.30    1.00
   6  -1 -14    1.30    0.70
  -6  -1  14    5.40    1.20
   6   1  14    2.20    1.20
   7   1 -14  147.19    8.10
   7  -1  14  124.89    8.60
  -7   1  14  139.49    7.60
   7   1  14  138.79    8.10
   7  -1 -14  149.39    8.20
  -7  -1  14  134.79    7.70
   0   2 -14   18.90    4.40
   0   2  14   23.90    2.40
   0  -2 -14   23.40    2.60
   0   2  14   25.80    4.20
   0   2 -14   21.20    2.60
   0   2  14   21.40    3.40
   0  -2  14   18.90    2.60
   0  -2  14   20.60    3.10
   1   2 -14  257.67   14.00
   1  -2  14  232.98   14.10
   1  -2  14  242.38   12.70
   1  -2  14  241.08   13.70
  -1  -2 -14  245.88   13.70
  -1   2  14  261.37   13.40
   1   2 -14  226.58   29.90
   1  -2 -14  224.68   29.00
   1   2  14  251.67   15.60
  -1  -2  14  232.98   14.00
  -1  -2  14  247.38   13.20
  -1   2 -14  212.58   16.70
   1   2  14  252.37   13.90
   1  -2 -14  245.58   13.60
   2  -2  14   33.80    3.70
   2  -2  14   28.60    3.60
   2   2 -14   28.50    3.80
  -2   2  14   34.20    3.10
   2   2 -14   21.20   10.60
   2   2  14   28.40    5.40
  -2   2 -14   30.50    5.90
   2  -2 -14   36.00   13.30
   2   2  14   34.00    3.80
   2  -2 -14   35.30    3.70
  -2  -2  14   33.10    3.00
  -2  -2  14   38.60    3.50
  -3  -2 -14  228.68   13.00
   3  -2  14  231.28   13.90
   3   2 -14  213.38   27.60
   3  -2  14  227.58   14.20
   3   2 -14  227.28   12.70
   3  -2 -14  227.28   13.00
   3  -2 -14  226.58   12.60
  -3  -2  14  237.08   12.80
   3  -2 -14  212.28   27.60
   3   2  14  244.68   15.90
   3   2  14  240.38   14.50
   3   2  14  226.18   14.00
   4  -2  14  592.74   31.50
   4  -2  14  614.94   30.10
   4   2 -14  530.75   47.60
  -4   2  14  593.74   29.90
  -4  -2 -14  567.74   29.80
   4   2  14  571.64   30.70
   4  -2 -14  614.04   49.20
   4   2  14  625.64   31.80
   4   2  14  590.74   33.50
   4   2  14  569.14   31.30
   4  -2 -14  576.04   29.80
  -4  -2  14  589.94   29.70
  -4   2 -14  574.84   30.00
   5   2 -14  494.75   25.90
  -5   2  14  509.95   25.30
   5   2 -14  406.66   45.20
   5  -2 -14  421.46   43.60
   5   2  14  473.75   26.00
  -5  -2  14  505.65   25.00
   5  -2 -14  523.25   25.20
   5   2  14  538.35   27.00
   6   2 -14   42.10    3.60
  -6   2  14   37.60    3.10
   6  -2  14   34.70    3.90
   6  -2  14   39.40    4.10
   6   2  14   43.10    4.00
   6   2  14   32.00    3.90
  -6  -2  14   40.00    3.00
   7  -2  14   33.50    3.30
   7   2 -14   41.60    3.00
   7  -2  14   32.40    2.90
   7   2  14   33.40    2.90
   7  -2 -14   41.50    2.50
   0  -3  14  318.07   17.80
   0  -3  14  336.37   16.90
   0  -3  14  311.67   17.50
   0  -3 -14  339.57   17.60
   0   3 -14  303.07   22.10
   0   3  14  327.97   19.60
   1   3 -14   73.09    9.50
  -1   3  14   76.39    5.50
   1   3 -14   80.29   19.50
   1  -3  14   78.59    4.90
   1  -3  14   76.39    6.10
  -1  -3 -14   78.59    5.70
   1  -3  14   79.59    5.90
   1   3 -14   83.79    6.10
  -1   3  14   73.09    7.00
   1  -3 -14   83.09    5.70
   1  -3 -14   69.49   19.90
  -1  -3  14   80.09    6.00
  -1  -3  14   86.59    5.40
  -1   3 -14   68.99    8.30
   1   3  14   78.99    7.50
   1   3  14   93.89    6.70
  -2   3  14  317.77   16.60
   2  -3  14  284.17   17.40
   2   3 -14  303.97   16.80
  -2  -3 -14  313.27   16.80
   2  -3  14  310.67   17.20
   2   3 -14  295.87   34.10
   2  -3 -14  298.87   16.40
   2   3  14  307.97   16.50
  -2  -3  14  315.07   16.30
  -2   3 -14  295.47   20.60
   2   3  14  301.57   19.30
  -2  -3  14  304.47   16.40
   2   3  14  312.97   18.20
   2   3  14  302.77   17.10
   3  -3  14   28.60    3.80
   3   3 -14   25.70   11.20
  -3  -3 -14   23.60    2.80
   3   3 -14   24.70    2.70
   3  -3  14   25.70    3.40
  -3   3  14   26.60    2.90
   3   3  14   27.90    5.00
   3   3  14   26.30    3.70
  -3   3 -14   31.20    6.10
   3   3  14   28.00    3.90
   3   3  14   27.50    3.00
   3  -3 -14   25.90    3.10
  -3  -3  14   24.30    2.70
   3  -3 -14   31.10    2.70
   3  -3 -14   29.20   11.40
  -4  -3 -14  261.07   15.70
   4   3 -14  239.88   30.10
   4  -3  14  265.17   15.00
   4  -3  14  258.07   16.00
  -4   3  14  253.27   14.50
   4   3  14  275.17   14.40
  -4  -3  14  257.27   14.30
   4   3  14  274.67   16.50
   4  -3 -14  271.27   14.30
   4  -3 -14  273.07   29.80
   5  -3  14  180.38   10.30
   5   3 -14  170.88   10.50
  -5   3  14  180.08   10.10
   5  -3  14  173.78   11.50
   5   3  14  163.08   11.40
  -5  -3  14  175.48    9.90
  -5   3 -14  169.58   10.10
   5  -3 -14  171.38    9.50
   5   3  14  169.08    9.50
   6  -3  14   46.90    3.60
   6  -3  14   51.19    4.70
   6   3 -14   52.09    4.00
   6   3  14   50.39    4.50
   6   3  14   44.70    3.90
  -6  -3  14   54.39    3.60
   7   3 -14  473.95   22.10
   7  -3  14  426.36   21.80
   7  -3  14  413.46   22.80
   7   3  14  476.95   22.70
  -7  -3  14  428.56   21.70
   0  -4  14    8.80    2.00
   0   4 -14    8.00    3.40
   0  -4 -14   10.50    1.70
   0   4  14   10.20    3.00
   0  -4  14   10.50    1.60
  -1   4  14   22.30    4.10
   1  -4  14   32.30    2.50
   1   4 -14   26.60    5.70
   1  -4  14   25.00    3.20
  -1  -4 -14   29.40    3.00
   1  -4  14   19.90    3.00
   1   4  14   26.50    2.70
  -1  -4  14   31.50    3.30
   1  -4 -14   27.80    2.80
  -1  -4  14   24.70    2.50
  -1   4 -14   19.80    4.90
   1   4  14   26.70    4.50
  -2   4  14   79.89    7.40
  -2   4  14   76.49    5.60
   2   4 -14   80.99    6.00
   2  -4  14   88.29    6.90
  -2  -4 -14   86.49    6.00
   2  -4  14   89.69    6.60
   2   4  14   90.09    5.90
  -2  -4  14   88.09    5.70
   2   4  14   77.39    8.50
   2  -4 -14   81.39   19.30
  -2  -4  14   79.59    6.10
   2  -4 -14   84.29    5.60
   2   4  14   89.49    7.50
  -2   4 -14   70.89    8.70
   3  -4  14   13.10    2.60
  -3   4  14   10.40    3.30
  -3   4  14   13.40    2.00
   3   4 -14   13.80    1.90
  -3  -4 -14   14.90    2.00
   3   4 -14   15.90   11.40
   3  -4  14   10.70    2.60
   3   4  14   14.40    1.90
  -3   4 -14   11.00    4.20
   3  -4 -14    5.50   10.30
   3   4  14   14.20    2.80
   3   4  14    9.80    4.20
   3  -4 -14   12.60    1.70
  -3  -4  14   14.80    1.90
   4   4 -14  117.99    8.00
   4  -4  14  123.69    7.50
   4  -4  14  114.79    8.70
  -4  -4 -14  107.49    7.10
   4   4  14  123.39    7.40
   4   4  14  118.39    9.20
  -4  -4  14  113.39    7.20
  -5  -4 -14  261.77   14.70
   5  -4  14  279.87   15.70
   5  -4  14  299.17   17.10
   5   4 -14  306.77   15.90
   5   4  14  311.97   17.50
  -5  -4  14  271.27   15.00
  -5   4 -14  290.87   15.30
   5   4  14  273.77   15.50
   6  -4  14  101.49    6.50
   6   4 -14  118.59    6.60
   6  -4  14  107.99    7.40
   6   4  14   93.99    7.20
   6   4  14  105.89    5.80
  -6  -4  14  113.79    6.20
   0  -5  14   23.70    4.50
   0  -5  14   17.10    1.90
   0   5  14   13.30    4.60
   0   5 -14   13.30    7.20
   1  -5  14  117.49    6.60
  -1   5  14  122.09   10.00
   1  -5  14  104.69    8.00
   1  -5  14  120.39    8.10
  -1  -5 -14  116.29    7.50
   1   5 -14  105.69   12.00
   1  -5 -14  120.99    7.30
  -1  -5  14  116.29    7.10
  -1   5 -14   98.59   11.10
   1   5  14  123.79    7.40
  -1  -5  14  115.59    7.90
   1   5  14  130.49   10.60
   2   5 -14  137.89   31.30
   2  -5  14  148.49   10.20
  -2  -5 -14  148.39    9.10
   2   5 -14  159.98    9.30
   2  -5 -14  151.98    8.80
  -2   5 -14  132.99   12.80
  -2  -5  14  158.78    8.90
   2  -5 -14  155.38   32.70
   2   5  14  154.38    9.60
   2   5  14  152.08   11.00
   3   5 -14  133.09    7.70
   3  -5  14  134.49    9.50
  -3  -5 -14  144.19    8.30
   3   5  14  139.49    8.40
  -3   5 -14  112.79   11.60
  -3  -5  14  133.79    8.10
   3  -5 -14  135.69    7.50
   3   5  14  144.19   10.80
  -4  -5 -14  487.05   24.50
   4   5 -14  508.25   25.20
   4  -5  14  472.45   26.30
  -4  -5  14  443.86   24.40
   4   5  14  514.45   24.80
   4   5  14  476.15   26.90
  -5  -5 -14   88.99    5.80
   5  -5  14   99.69    7.40
   5   5 -14  106.49    6.30
   5  -5  14   92.89    5.80
   5   5  14  106.19    6.00
   5   5  14   91.59    7.20
  -5  -5  14  101.69    6.20
  -5   5 -14  100.19    6.10
   6   5 -14   79.79    4.80
   6  -5  14   77.19    5.70
   6   5  14   69.19    6.30
  -6  -5  14   77.29    4.40
   0  -6 -14  585.04   29.70
   0   6 -14  574.94   36.30
   0  -6  14  603.54   29.20
   1   6 -14  224.48   19.30
  -1  -6 -14  247.48   13.70
   1  -6  14  255.17   14.90
   1  -6 -14  267.77   13.70
   1   6  14  266.57   13.90
  -1   6 -14  237.88   18.70
  -1  -6  14  250.77   13.40
   2   6 -14  868.71   43.40
  -2  -6 -14  915.91   43.50
  -2   6 -14  780.52   48.50
   2  -6 -14  864.61   42.90
   2   6  14  926.81   43.70
   2   6  14  914.41   45.90
  -2  -6  14  882.31   43.20
   3   6 -14  259.07   13.60
  -3  -6 -14  252.77   13.20
   3  -6  14  220.78   14.30
   3   6  14  246.88   13.40
   3   6  14  237.08   15.10
  -3  -6  14  240.58   13.10
  -4  -6 -14   19.60    1.90
   4   6 -14   25.00    2.20
   4  -6  14   24.60    3.00
  -4  -6  14   19.20    2.00
   4   6  14   21.40    2.20
   4   6  14   21.30    3.00
   5  -6  14  156.38    9.50
  -5  -6 -14  136.19    8.30
   5   6 -14  167.18    8.30
  -5  -6  14  167.08    8.50
   5   6  14  155.98    8.40
  -5   6 -14  152.88    8.50
   5   6  14  157.28    9.50
   0  -7  14  164.58    8.70
   0   7  14  162.78   10.40
   0  -7 -14  160.48    9.00
   0   7 -14  136.89   14.90
  -1  -7 -14   78.09    5.10
   1   7 -14   64.49   10.20
   1  -7  14   76.29    5.90
   1   7  14   80.09    6.30
   1   7  14   84.09    5.40
  -1  -7  14   79.39    4.80
  -1   7 -14   71.09    9.10
   1  -7 -14   79.99    4.90
   2   7 -14   23.90    2.20
  -2  -7 -14   26.40    2.40
   2  -7  14   23.20    3.00
   2   7 -14   28.30    2.40
   2   7  14   25.50    2.50
   2   7  14   30.90    3.40
  -2  -7  14   23.90    2.20
   2  -7 -14   26.10    2.00
   3  -7  14   11.80    2.00
  -3  -7 -14   11.60    1.40
   3   7  14   16.30    2.30
  -3  -7  14   11.80    1.60
   3   7  14   10.60    1.50
  -4  -7 -14   70.39    4.20
   4  -7  14   72.39    5.10
   4   7  14   72.09    4.40
  -4  -7  14   70.19    4.20
   4   7  14   61.79    4.90
   0   8  14  706.33   34.40
   0  -8 -14  689.03   34.00
   0  -8  14  699.43   35.00
  -1  -8 -14  239.48   12.40
  -1   8  14  219.68   13.00
   1  -8  14  242.98   13.30
   1   8 -14  237.58   12.80
   1  -8 -14  234.48   12.10
   1   8  14  238.08   13.30
   1   8  14  252.37   12.70
  -1  -8  14  236.68   11.90
  -2  -8 -14   57.19    3.50
   2  -8  14   54.69    4.20
  -2   8  14   46.90    3.80
   2   8  14   54.89    3.80
   2   8  14   54.39    4.20
  -2  -8  14   52.79    3.60
   3  -8  14    6.60    1.20
  -3   8  14    6.40    1.00
  -3  -8  14    6.40    0.80
   3   8  14    5.20    1.00
   3   8  14    5.70    0.90
   0   9  14   11.90    1.20
   0  -9  14   13.20    1.40
   0  -9 -14   12.50    1.00
   0   9 -14   11.20    1.10
   0   0  15    7.10    1.70
   0   0  15    0.50    1.50
   0   0 -15    6.80    1.60
   1   0  15  661.33   32.80
   1   0  15  619.94   30.40
   1   0  15  618.74   31.40
   1   0 -15  575.34   53.39
  -1   0  15  550.64   31.00
  -1   0 -15  638.24   31.70
   2   0 -15  110.59    7.30
   2   0 -15   80.09   19.30
  -2   0  15  109.69    7.00
   2   0  15  115.49    7.90
  -2   0 -15  109.49    7.50
   2   0  15  110.99    8.80
   2   0  15  121.89    8.10
   3   0  15    6.10    1.80
   3   0  15    7.70    1.80
   3   0 -15    5.70    1.40
   3   0  15    4.20    2.00
  -3   0  15    4.70    1.10
  -4   0  15  165.88    9.70
  -4   0 -15  168.78    9.90
   4   0 -15  158.68   10.20
   4   0  15  165.08   10.50
   4   0  15  165.88   10.80
   4   0 -15  173.58   25.10
   4   0  15  152.88   11.10
   5   0  15   62.69    4.90
  -5   0  15   55.89    4.30
   5   0 -15   62.99    4.80
   5   0  15   53.69    5.20
   6   0  15  122.49    8.80
  -6   0  15  134.39    7.70
   6   0 -15  138.89    8.00
   6   0  15  127.29    8.00
  -7   0  15   61.29    3.60
   7   0 -15   61.59    3.70
   7   0  15   47.30    4.20
   0  -1  15  865.31   43.90
   0   1 -15  927.11   45.30
   0  -1 -15  820.32   45.50
   0   1  15  868.11   43.50
   0  -1  15  925.71   43.50
   0   1  15  842.32   43.80
   0   1  15  903.21   45.70
   0  -1  15  930.71   45.00
  -1  -1 -15   25.80    3.80
   1   1 -15   31.80   12.90
  -1   1  15   32.50    3.60
   1  -1  15   34.00    3.40
   1  -1  15   32.50    2.60
   1   1 -15   31.10    3.20
   1  -1 -15   19.90   12.00
   1   1  15   29.50    4.20
   1   1  15   24.60    2.50
   1   1  15   27.30    3.60
   1  -1 -15   28.20    3.00
  -1  -1  15   24.00    3.00
  -1   1 -15   28.20    3.90
   2   1 -15   20.90   13.90
   2  -1  15   24.50    3.40
   2  -1  15   25.20    3.40
  -2   1  15   38.70    3.30
  -2  -1 -15   29.90    3.10
   2   1 -15   39.00    3.40
   2   1  15   29.80    4.40
  -2   1 -15   29.00    3.20
   2   1  15   35.40    3.80
  -2  -1  15   31.20    2.90
   2  -1 -15   29.50    3.00
   3  -1  15 1119.99   56.39
   3   1 -15  984.10   76.69
  -3  -1 -15 1123.29   55.39
   3   1 -15 1101.69   54.79
  -3   1  15 1144.29   55.09
   3  -1  15 1120.09   56.29
   3   1  15 1198.38   56.69
  -3   1 -15 1143.89   55.49
   3   1  15 1121.29   57.79
  -3  -1  15 1171.48   54.99
   3  -1 -15 1134.99   78.79
   3   1  15 1082.29   56.29
   3  -1 -15 1113.19   54.79
   4  -1  15  213.08   13.70
   4   1 -15  211.88   27.60
  -4  -1 -15  223.68   12.90
  -4   1  15  215.18   12.50
   4  -1  15  211.68   14.00
   4   1  15  235.58   13.80
  -4  -1  15  214.38   12.40
   4   1  15  222.68   14.30
   4  -1 -15  230.18   12.90
  -4   1 -15  232.18   13.20
   4   1  15  226.18   14.60
   4  -1 -15  228.38   27.80
   5  -1  15  113.39    7.20
   5   1 -15  109.79    7.50
   5  -1  15  109.99    8.20
  -5   1  15  115.39    7.10
   5  -1 -15  119.19    7.30
   5   1  15  113.39    7.90
   5   1  15  104.89    7.70
  -5  -1  15  110.09    7.00
  -6   1  15   30.40    3.10
   6   1 -15   30.20    2.80
   6  -1  15   23.60    3.80
   6   1  15   24.50    2.80
   6   1  15   26.50    2.70
   6  -1 -15   30.70    3.90
   7   1 -15  110.69    6.20
   7  -1  15   89.39    6.60
  -7  -1  15  107.69    5.90
   7  -1 -15  117.09    5.90
   7   1  15  105.89    6.70
   0  -2  15  675.03   32.20
   0   2  15  654.83   34.20
   0   2 -15  638.54   32.40
   0   2  15  559.14   34.30
   0  -2  15  596.14   33.50
   0  -2 -15  647.24   32.20
   1   2 -15   77.29   20.40
   1  -2  15   74.39    5.80
  -1   2  15   75.59    5.30
   1   2 -15   81.59    5.80
  -1  -2 -15   68.19    5.40
   1  -2  15   76.49    4.80
   1  -2  15   65.69    5.70
  -1   2  15   73.29    6.90
  -1  -2  15   81.49    5.20
   1   2  15   76.99    6.00
  -1   2 -15   72.69    8.60
   1  -2 -15   77.89    5.60
   1  -2 -15   63.29   26.00
   1   2  15   74.49    7.20
  -1   2 -15   74.49    5.70
  -1  -2  15   77.39    5.60
  -2   2  15   43.80    3.80
   2  -2  15   38.70    4.20
   2   2 -15   43.10   15.40
   2  -2  15   40.70    4.40
  -2  -2 -15   44.40    3.90
   2   2 -15   42.60    3.90
   2   2  15   37.80    5.50
   2   2  15   48.40    4.70
  -2  -2  15   47.50    3.70
   2  -2 -15   54.99    4.10
   2  -2 -15   55.79   16.10
  -2   2 -15   40.80    3.90
   2   2  15   46.30    4.70
  -3  -2 -15  197.48   11.60
  -3   2  15  190.08   11.30
   3   2 -15  194.38   27.90
   3  -2  15  201.68   12.60
   3   2 -15  196.78   11.20
   3  -2  15  203.38   12.50
  -3  -2  15  205.18   11.30
   3   2  15  189.78   14.10
   3   2  15  190.98   12.50
   3   2  15  209.48   12.90
   3  -2 -15  194.78   11.40
   3  -2 -15  195.18   11.00
   3  -2 -15  193.98   26.80
  -3   2 -15  196.58   11.70
   4   2 -15  397.56   22.00
   4   2 -15  320.97   42.10
   4  -2  15  416.36   23.40
  -4   2  15  411.26   21.30
  -4  -2 -15  404.66   20.90
   4  -2  15  402.26   20.80
  -4  -2  15  410.36   21.20
   4  -2 -15  416.66   21.00
   4   2  15  361.46   21.20
  -4   2 -15  404.66   21.10
   4  -2 -15  416.16   41.00
   5  -2  15   99.59    6.40
   5  -2  15   99.39    7.70
   5   2 -15   97.29    6.90
  -5   2  15   99.69    6.50
   5   2  15   98.89    7.40
  -5  -2  15   97.59    6.20
   5   2  15   99.99    6.90
   5  -2 -15   99.59    6.20
  -6   2  15  101.39    6.10
   6  -2  15   97.09    7.00
   6   2 -15   98.79    6.40
   6   2  15   98.09    6.70
   6  -2 -15   97.99    5.80
  -6  -2  15   98.29    5.90
   7   2 -15  156.48    7.90
   7  -2  15  139.59    8.40
  -7  -2  15  144.19    7.60
   7   2  15  136.19    7.80
   0  -3  15    4.10    1.60
   0   3 -15    1.70    2.20
   0  -3  15    2.80    1.40
   0   3  15    3.50    2.30
   0  -3 -15    3.00    1.00
  -1   3  15   37.10    4.90
   1  -3  15   38.10    3.00
   1   3 -15   41.70    3.90
   1  -3  15   41.00    4.10
  -1  -3 -15   36.80    3.70
  -1   3  15   41.00    3.50
   1  -3  15   36.60    4.10
   1  -3 -15   49.90    3.90
  -1  -3  15   41.00    3.40
   1   3  15   43.60    5.40
  -1  -3  15   41.30    3.90
   2   3 -15  769.22   37.10
  -2   3  15  746.43   36.80
   2  -3  15  747.63   37.60
   2   3 -15  679.53   59.19
   2  -3  15  751.82   38.00
  -2  -3 -15  747.03   37.10
   2   3  15  711.03   37.50
   2   3  15  766.02   40.60
   2  -3 -15  731.63   59.99
  -2  -3  15  725.33   36.50
   2   3  15  769.22   38.70
  -2   3 -15  671.73   41.10
  -2  -3  15  702.23   36.60
   2  -3 -15  723.33   36.60
  -3  -3 -15  201.88   11.40
   3   3 -15  189.88   10.90
   3   3 -15  179.98   26.10
   3  -3  15  200.48   12.60
   3  -3  15  189.08   12.20
  -3   3  15  200.88   11.30
   3   3  15  190.58   12.50
  -3  -3  15  190.88   11.00
   3   3  15  182.78   14.30
   3  -3 -15  232.48   29.10
   3  -3 -15  192.58   10.70
   3   3  15  198.88   12.90
  -4  -3 -15  174.88   10.10
   4   3 -15  169.08   10.80
  -4   3  15  164.88   10.10
   4  -3  15  170.88   11.50
   4   3  15  186.28   11.80
  -4   3 -15  181.08   10.40
   4  -3 -15  180.38    9.80
  -4  -3  15  167.08   10.00
   5   3 -15  315.27   17.20
   5  -3  15  340.47   16.60
  -5   3  15  316.17   16.60
   5  -3  15  288.07   17.80
  -5   3 -15  317.57   16.60
   5  -3 -15  318.97   16.30
   5   3  15  319.37   18.10
  -5  -3  15  297.87   16.40
   6   3 -15   27.60    2.50
   6  -3  15   21.90    2.70
   6  -3  15   22.70    2.10
   6   3  15   25.00    2.70
  -6  -3  15   24.60    2.10
   0   4 -15  417.66   28.40
   0  -4 -15  456.95   23.00
   0  -4  15  450.45   23.30
   0  -4  15  444.16   22.10
   0  -4  15  413.26   23.20
   0   4  15  431.86   25.80
   1  -4  15  112.39    8.00
   1   4 -15  119.19    7.80
  -1   4  15  116.49    9.90
   1   4 -15  105.09   12.40
   1  -4  15  113.49    8.10
  -1  -4 -15  121.09    7.60
  -1  -4  15  112.79    7.80
  -1  -4  15  114.79    7.00
   1   4  15  110.79    7.00
   1   4  15  110.99   10.20
   1  -4 -15  118.89    7.40
  -1   4 -15  111.09   11.80
   2  -4  15  330.47   18.80
   2   4 -15  346.57   18.00
  -2  -4 -15  335.37   17.80
  -2   4  15  312.87   19.90
   2   4 -15  302.47   38.50
   2  -4  15  337.37   18.70
   2  -4 -15  336.17   39.30
  -2  -4  15  315.87   17.90
   2   4  15  340.37   17.40
   2  -4 -15  329.87   17.40
  -2   4 -15  291.07   21.80
   2   4  15  338.57   19.70
   2   4  15  322.07   21.40
  -2  -4  15  352.86   17.50
   3   4 -15  389.56   41.80
  -3  -4 -15  443.16   22.40
   3  -4  15  425.26   23.80
   3   4 -15  423.96   21.90
   3   4  15  437.86   22.10
  -3  -4  15  429.26   22.20
   3  -4 -15  456.85   43.40
   3  -4 -15  429.06   21.60
   4   4 -15   17.80    2.40
  -4  -4 -15   19.00    2.00
   4  -4  15   17.30    2.60
   4   4  15   14.40    1.90
   4   4  15   21.70    3.20
  -4  -4  15   15.00    1.90
   5  -4  15  162.08   10.40
   5   4 -15  171.38    9.60
  -5  -4 -15  148.79    8.90
  -5   4 -15  175.18    9.40
   5   4  15  142.79    9.00
   5   4  15  170.28   10.70
  -5  -4  15  165.48    9.10
   6  -4  15   86.29    6.40
   6   4  15   86.09    6.00
  -6  -4  15   90.49    5.10
   0   5 -15    5.90    3.60
   0  -5 -15    7.40    1.50
   0  -5  15    5.40    1.90
  -1  -5 -15   26.40    3.50
   1  -5  15   27.80    3.20
   1   5 -15   23.90    8.10
  -1   5 -15   24.00    6.30
   1  -5 -15   25.10    3.00
   1   5  15   28.00    2.70
  -1  -5  15   30.30    3.00
  -2  -5 -15  297.67   15.80
   2  -5  15  298.57   17.00
   2   5 -15  298.27   15.90
  -2   5 -15  256.87   20.10
   2   5  15  290.07   17.70
  -2  -5  15  292.37   15.50
   2   5  15  302.07   15.70
  -3  -5 -15   22.30    2.30
   3  -5  15   22.00    3.00
   3  -5 -15   21.00    1.80
   3   5  15   23.50    3.70
   3   5  15   20.00    2.30
  -3  -5  15   19.90    2.20
   4   5 -15  210.98   11.80
  -4  -5 -15  214.08   11.30
   4  -5  15  201.08   12.60
   4   5  15  208.48   11.20
  -4  -5  15  202.28   11.30
  -5  -5 -15   30.90    2.40
   5  -5  15   39.50    3.60
   5   5 -15   40.50    3.00
  -5   5 -15   39.90    2.80
   5   5  15   35.90    2.50
   5   5  15   36.00    3.60
  -5  -5  15   34.00    2.70
   6   5 -15    9.30    1.00
   6  -5  15    6.10    1.20
  -6  -5  15    7.30    0.90
   6   5  15    7.00    1.10
   0   6 -15    2.90    2.90
   0  -6  15    0.90    0.70
   0  -6 -15    3.10    1.00
   0  -6  15    1.20    0.70
  -1  -6 -15   67.79    4.50
   1   6 -15   66.99    4.80
   1  -6  15   62.79    5.20
   1   6 -15   58.39    8.50
  -1  -6  15   56.79    4.10
   1   6  15   58.89    5.70
   1   6  15   60.99    4.40
  -1   6 -15   51.49    7.90
   1  -6 -15   59.19    4.30
  -2  -6 -15   81.59    5.50
   2  -6  15   84.09    6.50
   2   6 -15   92.79    5.60
   2   6  15   85.99    5.60
   2   6  15   77.29    6.70
  -2  -6  15   82.19    5.40
   2  -6 -15   88.19    5.20
   3  -6  15   12.50    2.00
  -3  -6 -15   12.30    1.60
   3   6  15   11.80    2.10
  -3  -6  15    9.70    1.40
   3   6  15    9.90    1.50
   4  -6  15   85.69    6.10
   4   6 -15   89.99    5.50
  -4  -6 -15   77.79    5.50
   4   6  15   84.19    5.00
   4   6  15   87.59    6.40
  -4  -6  15   78.09    5.00
   5   6 -15   14.80    1.80
   5  -6  15   12.20    1.70
   5   6  15   12.60    1.70
  -5  -6  15   13.60    1.30
   0   7  15  100.49    7.30
   0  -7 -15  101.19    6.10
   0   7  15  110.69    6.30
   0  -7  15   96.99    7.00
  -1  -7 -15   81.99    5.10
   1  -7  15   85.59    6.30
  -1  -7  15   83.09    4.80
   1  -7 -15   77.19    4.90
   1   7  15   75.19    6.10
   1   7  15   84.69    5.20
  -1  -7  15   76.69    5.50
  -2  -7 -15   57.49    3.70
   2  -7  15   47.80    4.20
   2   7 -15   54.19    3.50
   2   7 -15   39.50    3.30
   2  -7 -15   44.30    3.40
   2   7  15   48.90    4.40
   2   7  15   49.20    3.60
  -2  -7  15   57.69    3.40
   3  -7  15   77.69    5.60
  -3  -7 -15   87.89    4.80
   3   7 -15   80.89    4.50
  -3  -7  15   67.29    4.60
  -3  -7  15   81.99    4.70
   3   7  15   80.49    4.90
   3   7  15   76.39    5.70
  -4  -7 -15   16.80    1.40
   4  -7  15   17.30    2.00
  -4   7 -15   17.90    1.60
  -4  -7  15   20.20    1.60
   4   7  15   19.60    2.10
   0   8  15  116.29    6.20
   0  -8 -15  109.29    5.90
   0   8 -15  106.99    6.50
   0   8  15  104.69    6.70
   0  -8  15   97.89    6.50
   1  -8  15   57.29    4.20
  -1  -8 -15   63.19    3.70
  -1   8  15   64.59    3.80
  -1   8  15   55.99    4.20
   1   8 -15   56.19    3.40
   1  -8 -15   59.19    3.50
   1   8  15   62.99    3.90
   1   8  15   56.99    4.30
  -1  -8  15   57.39    4.20
  -2  -8 -15   77.09    4.30
  -2   8  15   76.09    4.20
  -2   8  15   67.59    4.60
   2  -8  15   76.79    4.90
   2   8  15   77.59    4.30
   2   8  15   66.79    4.80
  -2  -8  15   73.09    4.00
  -2  -8  15   69.29    4.30
   0   0  16   43.00    3.50
   0   0  16   51.79    5.10
   0   0  16   49.99    4.80
   0   0 -16   47.20    4.30
   1   0  16  938.61   47.00
   1   0  16  970.50   48.40
   1   0  16  921.61   46.20
   1   0 -16  937.01   46.70
  -1   0  16  899.61   46.00
   1   0  16  954.00   47.10
  -1   0 -16  926.41   46.80
   2   0  16 4988.70  258.57
   2   0 -16 5710.53  258.17
   2   0  16 5390.16  260.17
   2   0  16 5587.34  258.87
   2   0 -16 5438.66  306.27
  -3   0 -16   26.80    2.90
   3   0 -16   16.10   11.70
   3   0 -16   29.80    2.80
   3   0  16   24.50    3.20
  -3   0  16   31.30    2.90
   3   0  16   24.00    3.90
   3   0  16   30.40    3.40
  -4   0 -16  189.28   11.00
   4   0  16  187.68   11.70
   4   0 -16  182.88   25.80
  -4   0  16  191.58   10.90
   4   0  16  196.38   11.50
   4   0 -16  190.88   11.50
  -5   0  16   20.80    2.20
   5   0  16   22.80    2.40
   5   0  16   17.70    2.60
   5   0 -16   21.20    2.40
   6   0  16   10.70    1.90
  -6   0  16   15.80    1.60
   6   0 -16   12.10    1.60
  -7   0  16   95.29    5.40
   7   0 -16  105.49    5.50
   0   1  16  772.42   40.70
   0  -1  16  767.32   38.20
   0  -1  16  770.62   39.00
   0   1 -16  785.62   39.30
   0  -1 -16  745.03   39.00
   0  -1  16  793.12   40.10
   0   1  16  786.22   38.40
  -1   1  16  360.06   20.20
   1  -1  16  328.37   17.20
   1  -1  16  340.77   24.30
   1   1 -16  320.97   18.40
  -1  -1 -16  344.67   18.50
   1  -1  16  337.17   18.60
  -1   1  16  334.37   17.90
   1   1  16  353.36   20.50
   1  -1 -16  326.97   18.30
  -1   1 -16  332.17   18.60
   1   1  16  311.87   18.50
  -1  -1  16  366.26   17.80
  -2   1  16 1140.99   56.39
   2   1 -16 1191.78   56.69
   2  -1  16 1121.49   57.39
  -2  -1 -16 1186.28   56.89
   2   1  16 1186.68   59.39
  -2  -1  16 1122.39   56.19
   2   1  16 1161.78   57.69
  -2   1 -16 1121.89   56.89
   2  -1 -16 1125.89   56.59
   2   1  16 1140.79   57.49
   3   1 -16  780.52   64.99
   3   1 -16  868.51   42.20
  -3   1  16  837.12   42.30
   3  -1  16  841.42   43.40
  -3  -1 -16  888.41   42.70
   3  -1  16  799.62   43.60
   3   1  16  835.42   43.80
   3   1  16  889.61   43.90
  -3   1 -16  892.31   42.90
   3  -1 -16  854.41   42.10
   3   1  16  862.51   45.30
   3  -1 -16  855.21   65.99
  -3  -1  16  863.91   42.20
  -4  -1 -16  477.95   24.50
   4   1 -16  495.95   25.30
   4   1 -16  460.25   44.40
   4  -1  16  469.65   25.70
  -4   1 -16  505.35   24.70
  -4  -1  16  472.15   24.30
   4  -1 -16  492.25   48.30
   4   1  16  416.56   24.70
   4  -1 -16  487.55   24.80
   5  -1  16   52.09    4.70
  -5   1  16   55.39    4.20
   5   1 -16   53.89    4.40
   5   1  16   55.09    4.80
   5   1  16   57.19    4.70
  -5  -1  16   55.49    4.10
   5  -1 -16   57.89    4.30
  -6   1  16   52.89    3.50
   6   1 -16   45.40    3.50
   6  -1  16   39.80    3.70
   6   1  16   38.70    3.60
   6  -1 -16   53.09    3.40
  -6  -1  16   49.99    3.40
   6   1  16   43.80    3.40
   0   2 -16 3182.28  151.88
   0  -2  16 3270.87  151.68
   0   2  16 2988.90  150.68
   0  -2 -16 3227.58  151.68
   0  -2  16 3136.99  150.58
   1   2 -16 1642.24   77.19
   1  -2  16 1586.94   77.19
  -1  -2 -16 1564.44   76.99
  -1   2  16 1483.05   78.69
  -1   2  16 1556.24   76.49
   1   2  16 1649.83   79.79
  -1  -2  16 1578.74   76.79
  -1  -2  16 1547.75   76.19
   1  -2 -16 1620.44   76.99
  -1   2 -16 1546.25   77.09
   2   2 -16  152.48   28.10
   2  -2  16  188.48   11.80
   2  -2  16  187.48   11.70
  -2   2  16  190.88   11.00
   2   2 -16  197.78   11.20
  -2  -2 -16  188.48   11.20
  -2  -2  16  202.48   10.70
   2   2  16  170.08   11.80
  -2   2 -16  185.18   11.20
   2   2  16  194.08   12.30
   2  -2 -16  177.38   10.80
   2   2  16  198.08   13.80
   2  -2 -16  164.28   28.80
  -3  -2 -16   97.99    6.70
   3  -2  16   98.29    7.50
   3   2 -16   79.59   21.00
   3   2 -16   97.99    6.40
  -3   2  16  101.29    6.60
   3  -2  16   97.79   11.10
   3  -2 -16  111.29   21.90
  -3  -2  16   96.99    6.30
   3  -2 -16   92.49    6.10
   3  -2 -16   91.69    7.80
  -3   2 -16   99.09    6.80
   3   2  16  104.89    7.80
  -4  -2 -16   78.59    6.00
   4  -2  16   71.89    6.10
  -4   2  16   79.59    5.40
   4   2  16   71.29    6.10
   4  -2 -16   71.49    5.00
  -4   2 -16   75.39    5.30
  -4  -2  16   67.39    5.00
   5   2 -16   77.79    5.60
   5  -2  16   68.59    5.90
  -5   2  16   79.19    5.30
  -5   2 -16   71.79    5.50
   5  -2 -16   82.79    5.20
  -5  -2  16   81.99    5.20
   5   2  16   77.89    5.90
   6   2 -16  157.98    8.80
   6  -2  16  134.19    9.10
  -6   2  16  155.18    8.50
  -6  -2  16  159.18    8.40
   6   2  16  142.99    9.10
   6  -2 -16  163.98    8.10
   0  -3 -16   70.19    5.60
   0   3  16   75.99    7.50
   0   3 -16   78.29    5.90
   0  -3  16   82.79    6.10
   0  -3  16   83.49    5.10
  -1  -3 -16 1624.44   77.49
  -1   3  16 1511.15   80.19
   1  -3  16 1567.34   77.89
   1  -3  16 1612.94   78.19
   1   3 -16 1734.43   77.89
  -1   3  16 1562.94   76.89
  -1   3 -16 1565.54   77.69
   1  -3 -16 1587.04   77.29
  -1   3 -16 1481.45   83.79
  -1  -3  16 1599.94   76.79
  -1  -3  16 1597.04   77.69
   1   3  16 1624.44   80.79
   2   3 -16  592.64   29.00
   2  -3  16  572.04   29.80
   2   3 -16  501.85   50.69
  -2  -3 -16  587.94   29.00
  -2   3  16  550.84   28.50
  -2   3  16  563.94   31.30
   2  -3  16  571.54   29.70
  -2   3 -16  467.95   32.50
   2   3  16  623.04   30.80
   2  -3 -16  572.04   55.29
  -2   3 -16  546.15   29.10
   2  -3 -16  567.94   28.50
   2   3  16  564.84   32.40
  -3  -3 -16  228.48   12.80
   3   3 -16  235.18   12.30
  -3   3  16  225.88   12.70
   3   3 -16  208.98   30.90
   3  -3  16  218.78   13.60
  -3   3 -16  226.68   12.90
   3  -3 -16  239.98   32.80
   3   3  16  229.08   14.20
   3  -3 -16  227.78   12.00
  -3  -3  16  206.68   12.30
   4  -3  16   60.99    5.50
  -4   3  16   65.59    4.80
  -4  -3 -16   59.19    4.50
  -4   3 -16   70.39    4.90
   4   3  16   74.99    6.00
  -4  -3  16   63.39    4.60
   5   3 -16  392.66   20.10
   5  -3  16  345.67   21.30
  -5   3 -16  393.46   19.50
  -5  -3  16  388.26   19.40
   5   3  16  381.76   20.70
   6   3 -16  341.17   17.30
   6  -3  16  320.17   17.80
   6   3  16  346.57   17.70
  -6  -3  16  339.07   16.90
   0   4 -16  144.69   14.00
   0   4  16  166.68   13.40
   0  -4  16  150.88   11.10
   0  -4  16  163.78    9.00
   0   4 -16  185.48   10.40
   0  -4 -16  159.18    9.70
   1  -4  16  688.23   41.90
   1   4 -16  833.82   39.90
  -1  -4 -16  840.92   39.70
   1  -4 -16  826.92   39.40
  -1   4 -16  746.83   49.50
  -1  -4  16  763.92   39.50
  -1  -4  16  812.52   39.00
   2   4 -16   98.49    6.70
  -2  -4 -16   96.49    6.60
   2  -4  16  100.59    7.40
  -2   4 -16   85.39   10.20
  -2  -4  16  100.09    6.30
   2   4  16  117.59    8.60
   2  -4 -16  100.99    6.30
  -3  -4 -16   74.89    5.10
   3   4 -16   66.19    4.50
   3  -4  16   67.09    5.80
  -3  -4  16   74.89    5.10
   3   4  16   75.09    6.50
   3  -4 -16   69.69    4.40
   4   4 -16  107.39    7.00
   4  -4  16  100.29    7.40
  -4  -4  16  102.29    6.40
   4   4  16   99.59    7.90
  -4   4 -16  112.09    6.90
  -5  -4 -16   32.50    2.70
   5   4 -16   44.00    3.30
   5  -4  16   36.30    3.60
   5   4  16   40.10    3.80
  -5  -4  16   40.80    3.00
  -5   4 -16   44.50    3.00
   6  -4  16    2.00    0.70
   6   4 -16    2.20    0.70
   6   4  16    1.50    0.60
  -6  -4  16    2.20    0.50
   0   5 -16   72.09    9.70
   0  -5  16   85.39    5.10
   0  -5  16   83.99    6.20
   0  -5 -16   89.09    5.80
   1   5 -16  266.67   14.50
   1  -5  16  262.37   15.10
  -1  -5 -16  236.38   14.00
   1   5  16  283.07   16.70
  -1  -5  16  261.17   14.60
  -1   5 -16  225.78   18.70
  -1  -5  16  271.37   13.80
   1  -5 -16  267.67   14.10
   2   5 -16   80.69    5.30
   2  -5  16   81.89    6.20
  -2  -5 -16   80.79    5.40
   2  -5 -16   78.09    5.00
   2   5  16   77.49    6.90
  -2  -5  16   80.09    5.20
  -2  -5  16   74.99    6.60
   2   5  16   70.79    5.10
   3  -5  16   79.39    6.10
  -3  -5 -16   76.39    5.10
   3   5  16   70.19    4.80
  -3  -5  16   78.19    5.00
   3   5  16   79.29    6.70
   4   5 -16    4.00    1.00
  -4  -5 -16    2.10    0.80
   4  -5  16    1.80    1.00
   4   5  16    3.40    1.60
  -4   5 -16    1.70    0.90
   5   5 -16   73.89    4.40
   5  -5  16   66.39    4.90
  -5  -5  16   75.49    4.50
   5   5  16   69.19    5.10
  -5   5 -16   69.09    4.30
   0  -6  16   31.80    2.30
   0   6 -16   32.00    3.20
   0  -6 -16   31.40    2.80
   0   6  16   35.20    3.00
   0   6 -16   29.10    6.30
   0  -6  16   37.70    3.40
   1  -6  16  181.18   10.90
  -1  -6 -16  175.78   10.00
   1   6 -16  185.58   10.30
   1  -6 -16  180.58    9.90
   1   6  16  172.38   11.60
  -1  -6  16  187.08   11.70
  -1   6 -16  148.29   14.30
  -1  -6  16  182.88    9.60
   1   6  16  187.28    9.90
  -2  -6 -16   21.80    2.20
   2   6 -16   20.60    2.00
   2  -6  16   20.90    2.70
   2   6  16   22.90    2.20
  -2  -6  16   22.80    2.00
   2  -6 -16   23.90    2.00
  -2  -6  16   23.90    2.40
   2   6  16   24.50    3.20
  -3  -6 -16  286.27   14.40
   3  -6  16  269.27   15.40
   3   6 -16  282.37   14.60
   3   6  16  263.67   14.40
  -3  -6  16  279.47   14.30
   3   6  16  277.97   16.30
   4  -6  16   19.90    2.60
  -4  -6 -16   23.00    1.90
   4   6 -16   25.30    2.30
  -4   6 -16   23.80    2.20
   4   6  16   31.10    3.00
  -4  -6  16   31.10    2.20
   0  -7  16   21.20    2.40
   0   7  16   22.30    2.00
   0  -7 -16   22.60    2.00
   0   7 -16   25.00    2.30
   0   7  16   25.20    2.80
   1  -7  16  269.07   14.50
   1   7 -16  265.07   13.80
  -1   7  16  262.77   13.60
   1   7  16  275.47   13.70
  -1  -7  16  261.07   13.20
  -1   7 -16  268.97   14.20
   1   7  16  252.97   14.90
  -1  -7  16  259.07   14.10
   1  -7 -16  275.77   13.60
   2   7 -16  148.89    7.10
  -2  -7 -16  135.09    7.20
   2  -7  16  123.89    7.90
   2   7  16  130.49    7.00
  -2  -7  16  121.69    7.10
   2   7  16  114.39    8.10
  -3  -7 -16  244.08   12.10
   3  -7  16  203.38   12.60
   3   7  16  233.28   13.00
  -3   7 -16  252.87   12.50
  -3  -7  16  245.58   11.90
   0  -8  16   47.30    3.30
   0   8  16   48.60    3.60
   0  -8 -16   50.79    3.00
   0   8 -16   50.39    3.10
  -1  -8 -16   65.79    3.70
   1  -8  16   57.39    3.80
  -1   8  16   52.79    3.70
  -1   8 -16   63.89    3.90
  -1  -8  16   45.30    3.50
   1   8  16   52.99    3.80
   0   0  17    2.70    2.50
   0   0 -17    0.40    0.80
   0   0  17   -0.40    0.60
   1   0  17 1490.85   79.19
   1   0 -17 1677.23   78.99
  -1   0  17 1604.04   80.59
  -1   0 -17 1664.33   79.19
   1   0  17 1636.14   79.29
   1   0  17 1639.64   80.89
  -2   0  17    6.30    1.40
  -2   0 -17    9.50    2.10
   2   0  17    5.90    2.00
   2   0  17    4.80    2.80
   2   0 -17    3.70    1.20
   2   0 -17    8.60   15.70
  -3   0  17  210.18   13.90
   3   0 -17  224.38   12.00
   3   0  17  199.38   12.60
   3   0 -17  221.88   31.30
  -3   0 -17  235.38   12.70
   4   0  17  471.85   25.50
   4   0 -17  497.25   25.40
  -4   0 -17  514.05   25.10
  -4   0  17  466.15   24.80
   5   0  17   71.79    5.20
   5   0 -17   75.39    5.10
  -5   0  17   74.59    5.00
  -6   0  17    9.20    1.20
   6   0  17    6.60    1.50
   0  -1  17   74.39    6.50
   0   1  17   77.29    5.20
   0  -1  17   74.29    8.20
   0   1  17   76.49    7.30
   0  -1  17   88.39    5.30
   0  -1 -17   79.19    5.90
   0   1 -17   75.89    5.90
  -1  -1 -17  376.76   20.70
   1  -1  17  384.16   21.20
  -1   1  17  384.06   20.10
  -1   1  17  380.36   22.30
   1   1 -17  379.46   20.80
  -1   1 -17  375.16   20.80
   1  -1 -17  390.36   20.60
  -1  -1  17  387.56   22.00
   1   1  17  398.56   21.50
   1   1  17  409.96   23.20
  -1  -1  17  380.76   20.00
   2  -1  17  427.16   23.90
  -2   1  17  426.06   22.70
  -2  -1 -17  451.65   23.20
   2   1 -17  457.85   23.00
   2   1 -17  387.96   45.50
   2  -1 -17  450.05   23.00
   2   1  17  452.55   23.90
   2   1  17  451.35   26.00
   2   1  17  418.36   24.00
  -2  -1  17  444.06   22.60
  -2   1 -17  443.86   23.30
   2  -1 -17  414.36   46.10
  -3  -1 -17  504.25   25.90
   3  -1  17  511.25   26.50
  -3   1  17  489.55   25.70
   3   1 -17  507.85   25.40
   3   1 -17  469.25   48.30
  -3   1 -17  513.95   26.10
   3  -1 -17  491.95   26.00
  -3  -1  17  478.85   25.50
   3  -1 -17  498.35   25.30
   3  -1 -17  497.45   48.80
   3   1  17  537.85   27.00
   4  -1  17    7.20    1.90
   4   1 -17    6.50    1.70
  -4   1  17    8.50    1.50
  -4  -1 -17    9.90    1.60
  -4  -1  17   10.60    1.60
   4   1  17    7.50    2.00
   4  -1 -17    7.60    1.60
  -4   1 -17   10.10    1.80
   5  -1  17   17.60    2.30
   5   1 -17   15.60    2.10
   5   1  17   16.00    2.00
   5  -1 -17   19.90    2.00
  -5  -1  17   20.00    2.10
   6   1 -17   35.30    2.70
  -6   1  17   34.30    2.80
   6  -1  17   29.80    2.60
   6  -1 -17   36.10    2.40
  -6  -1  17   29.70    2.60
   0   2  17  364.46   23.50
   0  -2  17  352.76   17.80
   0  -2 -17  348.37   18.80
   0  -2  17  315.47   19.80
   1  -2  17  713.53   38.30
   1   2 -17  817.02   38.30
  -1   2  17  757.02   37.40
  -1   2  17  701.43   39.90
  -1  -2 -17  798.92   38.20
  -1   2 -17  733.53   38.10
   1   2  17  766.82   40.90
  -1  -2  17  731.23   37.20
   1  -2 -17  744.73   37.90
  -2   2  17  242.48   13.20
   2  -2  17  231.08   13.80
   2   2 -17  243.38   13.30
  -2  -2 -17  240.98   13.50
   2  -2 -17  237.78   13.10
   2   2  17  234.08   14.40
  -2  -2  17  238.08   12.90
   2  -2 -17  215.98   14.40
  -2   2 -17  230.58   13.60
   3  -2  17  313.77   18.30
  -3  -2 -17  336.97   17.90
   3   2 -17  322.57   17.10
  -3   2  17  347.67   17.80
  -3  -2  17  321.47   17.40
   3   2  17  341.07   19.00
   3  -2 -17  322.07   17.40
   3  -2 -17  353.36   17.20
  -3   2 -17  322.87   17.90
  -4  -2 -17   71.29    4.90
   4   2 -17   68.79    5.30
  -4   2  17   67.09    5.00
   4  -2  17   66.19    5.50
   4   2  17   73.49    5.90
  -4   2 -17   75.39    5.10
  -4  -2  17   64.49    4.70
   4  -2 -17   78.09    4.90
   5  -2  17  255.87   14.30
  -5   2  17  251.57   13.80
   5   2 -17  253.07   13.90
  -5   2 -17  245.18   13.20
   5  -2 -17  271.37   13.30
  -5  -2  17  260.97   13.70
   5   2  17  249.68   14.20
   6   2 -17  112.39    6.40
   6  -2  17   82.89    5.80
   6   2  17   93.79    5.70
  -6  -2  17  109.09    5.70
   0  -3  17   13.50    1.70
   0  -3 -17   16.20    2.10
   0   3 -17   13.40    2.20
   1  -3  17   15.10    2.80
  -1  -3 -17   20.10    2.40
   1   3 -17   18.00    2.50
   1  -3 -17   19.60    2.30
  -1  -3  17   21.40    2.20
  -1   3 -17   17.40    2.40
  -2   3  17    8.90    1.50
  -2  -3 -17   11.10    1.90
   2  -3  17   11.10    2.10
   2   3 -17   10.20    1.70
   2  -3 -17   13.20    1.70
   2   3  17   11.30    2.80
  -2  -3  17    9.90    1.50
  -2   3 -17    9.90    2.10
   3   3 -17   46.80    3.30
  -3  -3 -17   55.79    4.10
   3  -3  17   46.50    4.30
  -3   3  17   41.80    3.70
  -3   3 -17   45.20    3.90
   3  -3 -17   45.20    3.20
   3   3  17   50.59    4.80
   4   3 -17  503.85   25.40
  -4   3  17  499.25   24.80
   4  -3  17  483.05   25.80
  -4  -3 -17  479.25   24.70
  -4  -3  17  485.05   24.60
   4   3  17  501.75   26.20
  -4   3 -17  465.65   26.00
   5   3 -17   59.99    4.20
   5  -3  17   53.49    4.40
  -5   3 -17   52.29    3.50
   5   3  17   54.29    4.30
  -5  -3  17   59.79    3.80
   6  -3  17  121.79    7.50
  -6  -3  17  151.88    7.30
   6   3  17  131.49    7.50
   0  -4 -17  829.42   41.00
   0  -4  17  841.12   41.30
   0   4 -17  794.82   41.30
   1  -4  17   29.40    3.30
   1   4 -17   34.00    3.20
  -1  -4 -17   30.70    3.00
  -1  -4  17   32.10    2.70
  -1   4 -17   29.10    6.30
   1   4  17   32.30    3.90
   1  -4 -17   29.90    2.90
  -1   4 -17   30.30    3.30
   2  -4  17  306.37   16.70
   2   4 -17  300.07   15.70
  -2  -4 -17  296.87   15.90
   2   4  17  284.57   17.20
  -2   4 -17  297.57   16.20
  -2  -4  17  278.87   15.30
   2  -4 -17  286.27   15.40
   3  -4  17   87.89    6.60
  -3  -4 -17   99.39    6.00
   3  -4 -17   93.19    5.20
   3   4  17   88.29    7.10
  -3   4 -17   90.59    6.20
   4   4 -17  139.39    8.10
  -4  -4 -17  128.19    7.40
   4  -4  17  131.69    8.40
  -4  -4  17  123.19    7.40
  -4   4 -17  129.59    7.70
   4   4  17  135.89    9.30
   5  -4  17   38.10    3.30
   5   4 -17   44.00    3.10
  -5   4 -17   36.70    3.10
   5   4  17   36.60    3.40
  -5  -4  17   41.60    2.80
   0   5 -17    4.30    1.30
   0  -5  17    4.40    1.30
   0  -5  17    4.80    1.00
   1  -5  17  143.19    9.00
  -1  -5 -17  147.89    8.50
   1   5 -17  143.99    8.60
  -1  -5  17  141.99    8.70
   1   5  17  134.29    9.80
   1  -5 -17  146.89    8.30
  -1   5 -17  144.59    8.90
  -1  -5  17  140.09    7.80
  -1   5 -17  122.89   12.40
  -2  -5 -17  189.28   10.50
   2  -5  17  192.78   11.30
   2   5 -17  175.88   10.20
   2  -5 -17  183.18   10.00
   2   5  17  192.98   12.20
  -2   5 -17  189.38   10.80
  -2  -5  17  179.48   10.10
  -3  -5 -17    2.90    0.90
   3   5 -17    3.30    1.20
   3  -5  17    1.00    0.80
   3   5  17    1.50    1.00
  -3  -5  17    1.10    0.60
  -3   5 -17    0.60    0.70
  -4  -5 -17  108.99    6.10
   4   5 -17  115.19    6.50
   4   5  17  101.19    7.20
  -4   5 -17  108.99    6.40
  -4  -5  17  108.69    6.20
   5  -5  17  165.28    9.30
   5   5 -17  182.98    8.80
  -5  -5  17  172.28    8.70
   5   5  17  154.78    9.40
   0   6 -17  385.96   21.50
   0  -6  17  441.66   21.90
   0   6  17  443.56   23.10
   0  -6 -17  407.16   21.20
   1   6 -17   41.10    3.50
  -1  -6 -17   46.60    3.40
   1  -6  17   49.50    3.90
  -1   6 -17   46.00    3.70
  -1  -6  17   44.10    2.90
   1  -6 -17   41.00    3.90
  -1  -6  17   45.10    3.50
   1   6  17   50.59    4.50
   2   6 -17   58.59    4.00
  -2  -6 -17   69.69    4.40
   2  -6  17   66.99    5.00
  -2  -6  17   67.99    4.10
   2   6  17   73.49    5.70
  -2   6 -17   63.99    4.60
   2  -6 -17   66.29    4.20
   3   6 -17   54.49    3.60
   3  -6  17   50.59    4.00
  -3  -6 -17   51.29    3.60
  -3   6 -17   60.49    3.90
  -3  -6  17   54.79    3.40
   3   6  17   51.99    4.50
   4   6 -17   33.70    2.60
   4  -6  17   26.00    2.40
  -4  -6 -17   31.80    2.00
   4   6  17   27.90    2.90
  -4   6 -17   30.60    2.20
   0   7 -17   19.80    1.90
   0   7  17   22.00    2.40
   0  -7 -17   20.70    1.70
   0  -7  17   19.30    1.90
  -1   7  17   91.49    6.00
   1   7 -17   86.89    5.10
  -1  -7 -17   89.69    5.20
   1  -7  17   86.99    5.60
   1   7 -17   96.29    5.10
  -1   7 -17   91.49    5.50
   1  -7 -17   91.69    4.90
   1   7  17   81.89    5.90
  -2   7  17   28.00    2.60
  -2  -7 -17   32.70    2.20
   2  -7  17   27.90    2.40
   2   7  17   29.30    2.70
  -2   7 -17   32.70    2.40
  -2  -7  17   27.60    1.80
   0   0  18  120.89    7.20
   0   0 -18  122.59    8.00
  -1   0 -18   85.89    6.40
  -1   0  18   90.69    5.90
   1   0 -18   95.19    6.40
   2   0 -18  202.18   11.70
  -2   0 -18  209.88   12.00
  -2   0  18  203.78   11.50
  -3   0 -18   11.50    2.10
  -3   0  18    9.20    1.70
   3   0 -18    8.60    1.40
   4   0 -18  433.96   21.90
  -4   0  18  390.26   21.40
  -4   0 -18  434.66   22.40
  -5   0  18   96.69    6.00
   5   0 -18  100.79    6.10
   6   0 -18   59.19    3.50
  -6   0  18   58.29    3.70
   0  -1  18    3.10    1.00
   0  -1 -18    0.50    0.70
   0   1 -18    1.90    0.90
   0   1  18    1.30    1.00
  -1  -1 -18  866.81   43.00
  -1   1  18  801.12   43.00
   1   1 -18  877.71   42.90
   1  -1 -18  871.51   42.90
  -1  -1  18  828.62   42.40
  -1   1 -18  877.01   43.20
   1   1  18  881.41   44.40
  -2   1  18   97.09    6.40
  -2  -1 -18  100.99    6.80
   2   1 -18   93.69    6.40
  -2  -1  18  101.19    6.30
   2   1  18   97.09    7.10
   2  -1 -18   95.99    6.40
  -2   1 -18   97.89    6.80
  -3   1  18  237.28   13.40
   3   1 -18  239.58   12.90
  -3  -1 -18  258.77   13.70
  -3   1 -18  256.67   13.80
   3   1  18  243.78   14.00
  -3  -1  18  237.98   13.30
   3  -1 -18  248.38   13.60
   3  -1 -18  234.68   12.80
  -4  -1 -18   41.60    3.30
  -4   1  18   36.50    3.30
   4   1 -18   42.20    3.60
  -4   1 -18   44.10    3.50
   4  -1 -18   40.90    3.30
  -4  -1  18   39.60    3.30
   4   1  18   38.90    3.50
  -5   1  18  309.57   15.50
   5   1 -18  315.47   15.70
   5  -1  18  253.27   15.20
  -5  -1  18  307.47   15.40
   5  -1 -18  333.77   16.50
   5   1  18  267.27   15.10
   6   1 -18   40.20    2.70
  -6  -1  18   37.30    2.60
   0  -2  18   85.19    5.30
  -1   2  18   39.10    3.40
  -1  -2 -18   45.20    4.00
   1   2 -18   48.10    4.10
   1   2  18   50.79    4.70
  -1   2 -18   47.50    4.10
  -1  -2  18   45.30    3.50
   1  -2 -18   43.50    3.80
   2   2 -18  176.98   10.70
  -2  -2 -18  180.28   11.00
  -2   2  18  194.28   10.80
   2   2  18  198.68   12.00
  -2  -2  18  191.78   10.60
  -2   2 -18  187.58   11.20
   2  -2 -18  191.18   10.70
   2  -2 -18  183.58   10.60
   3  -2  18   13.80    2.90
  -3   2  18   12.60    1.70
   3   2 -18   13.90    1.60
  -3  -2 -18   11.50    1.80
   3  -2 -18   12.80    1.50
  -3  -2  18   12.40    1.70
   3   2  18   13.70    2.20
   3  -2 -18   13.00    1.90
  -3   2 -18   15.80    1.90
   4  -2  18   19.20    2.30
  -4   2  18   21.40    2.20
   4   2 -18   20.90    2.40
  -4  -2 -18   17.30    1.90
  -4   2 -18   22.70    2.10
  -4  -2  18   18.00    1.90
   4   2  18   15.80    2.30
   5   2 -18  208.28   11.30
   5  -2  18  187.78   11.20
  -5   2  18  222.38   11.10
  -5  -2  18  216.68   11.00
   5   2  18  199.28   11.60
   0   3 -18   54.39    4.50
   0  -3 -18   52.89    4.30
   0  -3  18   51.39    3.50
   1  -3 -18  791.02   40.20
   1   3  18  825.12   41.70
  -1  -3  18  806.52   39.60
   2  -3  18  137.29    8.80
   2   3 -18  148.99    8.40
  -2  -3 -18  142.79    8.60
   2   3  18  146.29    9.60
  -2  -3  18  130.29    8.00
   2  -3 -18  137.09    8.20
  -2   3 -18  139.89    8.70
   3  -3  18   96.99    6.80
  -3  -3 -18  102.59    6.40
  -3   3 -18  101.79    6.60
   3  -3 -18   98.89    5.60
  -3  -3  18  100.29    6.20
   3   3  18  107.39    7.50
   4   3 -18    8.80    1.50
  -4  -3 -18   10.30    1.30
   4  -3  18    7.90    1.90
  -4   3 -18    7.90    1.40
  -4  -3  18    8.00    1.30
   4   3  18    8.40    1.50
   5   3 -18   58.89    3.90
   5  -3  18   54.19    3.90
   5   3  18   61.99    4.30
  -5  -3  18   53.79    3.60
   0  -4 -18    0.80    0.60
   0   4 -18    0.30    0.60
   0  -4  18    0.40    0.80
   1  -4  18  263.17   14.30
   1   4 -18  255.87   14.20
  -1  -4 -18  256.37   14.10
   1   4  18  283.67   15.70
   1  -4 -18  258.87   13.90
  -1  -4  18  257.97   13.50
  -1   4 -18  233.78   14.30
   2   4 -18  210.48   11.70
   2  -4  18  232.98   12.60
  -2  -4 -18  219.78   12.10
  -2  -4  18  203.78   11.50
  -2   4 -18  205.68   12.30
   2  -4 -18  223.88   11.60
   2   4  18  227.18   13.50
  -3  -4 -18  174.38    9.70
   3  -4  18  175.08   10.30
  -3  -4  18  168.58    9.40
   3   4  18  168.08   10.80
  -3   4 -18  173.58   11.10
   4  -4  18  128.59    8.00
   4   4 -18  136.79    7.90
  -4  -4 -18  122.29    7.20
  -4  -4  18  143.39    7.50
   4   4  18  143.59    8.50
  -4   4 -18  128.99    7.50
   5   4 -18   89.19    5.10
   5  -4  18   70.29    5.00
  -5  -4  18   90.09    5.20
   0   5 -18  186.08   10.70
   0  -5 -18  188.88   10.40
   1  -5  18  111.59    7.00
  -1  -5 -18  114.79    6.70
   1   5 -18  101.39    6.60
   1  -5 -18   99.09    6.30
  -1   5 -18  101.79    6.80
   1   5  18  111.99    8.00
  -1  -5  18  110.59    6.00
   2  -5  18  139.99    8.90
   2   5 -18  137.89    7.70
  -2   5 -18  147.49    9.40
  -2  -5  18  142.19    7.80
   2  -5 -18  143.09    7.60
   2   5  18  143.79    9.60
  -3  -5 -18   -0.20    0.40
   3   5 -18    1.00    0.60
   3  -5  18    1.10    0.80
  -3  -5  18    0.80    0.50
   4   5 -18  130.79    7.30
  -4  -5 -18  111.69    6.10
   4  -5  18  112.49    6.70
  -4  -5  18  115.49    6.30
   4   5  18  106.39    7.00
  -4   5 -18  117.49    6.40
   0  -6 -18  502.35   23.00
   0  -6  18  405.66   23.80
   0   6  18  496.35   24.70
   0   6 -18  436.06   23.10
  -1  -6 -18  105.69    6.20
   1   6 -18  109.09    6.20
   1  -6  18  101.99    6.40
   1   6  18  116.99    7.70
  -1   6 -18  109.89    6.60
   1  -6 -18  105.59    6.00
   2  -6  18   86.49    5.90
   2   6 -18  107.79    5.90
  -2  -6 -18  102.89    5.80
   2   6  18  101.69    6.80
  -2  -6  18   97.59    5.40
  -2   6 -18  102.59    6.10
   3  -6  18   18.50    1.90
   3   6 -18   23.30    1.70
  -3  -6 -18   21.00    1.70
  -3  -6  18   20.20    1.50
  -3   6 -18   18.90    1.90
   3   6  18   19.20    2.20
   0   7 -18  922.01   45.50
   0   7  18  973.20   46.70
  -1  -7 -18    1.70    0.50
  -1   7  18    3.70    1.10
   1   7  18    0.80    0.80
  -1   7 -18    2.40    0.60
   0   0 -19    0.70    0.80
   0   0  19    0.30    0.80
   0   0  19   -1.20    1.30
  -1   0  19   81.29    5.30
   1   0 -19   82.99    5.80
  -1   0 -19   84.49    6.00
  -2   0  19   37.60    3.10
   2   0 -19   35.20    3.10
  -2   0 -19   37.20    3.40
   3   0 -19   11.10    1.40
  -3   0 -19   13.30    1.80
   3   0 -19   12.80    1.80
  -3   0  19   12.90    1.70
   4   0 -19  309.87   16.20
  -4   0  19  314.87   16.20
  -4   0 -19  303.37   16.00
  -5   0  19    2.30    0.60
   5   0 -19    1.90    0.60
   0  -1 -19    0.10    0.70
   0   1 -19    0.70    0.70
   0  -1  19    1.10    0.70
   0   1  19    0.80    1.00
  -1  -1 -19  101.49    6.90
   1   1 -19   98.29    6.70
  -1   1  19   97.29    6.20
  -1   1 -19  108.19    7.00
  -1  -1  19   96.09    6.10
   1  -1 -19  101.79    6.80
   1   1  19  106.79    7.20
   2   1 -19   29.60    2.60
  -2  -1 -19   30.20    2.90
  -2   1  19   24.90    2.50
  -2  -1  19   24.90    2.40
  -2   1 -19   25.70    2.80
   2   1  19   25.80    3.00
   2  -1 -19   28.80    2.60
  -3   1  19   59.49    4.40
  -3  -1 -19   70.69    4.70
   3   1 -19   61.39    3.90
   3   1 -19   60.39    4.70
  -3   1 -19   67.29    4.70
   3   1  19   61.69    4.70
   3  -1 -19   62.19    3.90
   3  -1 -19   62.29    4.70
  -3  -1  19   63.39    4.40
  -4   1  19  180.78   10.80
   4   1 -19  207.38   11.00
  -4  -1 -19  194.28   10.50
   4  -1 -19  200.28   10.50
   4   1  19  179.08   10.50
  -4   1 -19  198.18   10.60
  -4  -1  19  203.58   11.40
  -5   1  19  170.08    9.80
   5   1 -19  192.38    9.90
   5  -1 -19  189.68    9.40
  -5  -1  19  183.38    9.90
   0  -2  19   23.50    2.10
   0  -2 -19   26.50    2.80
   0   2 -19   26.00    2.80
  -1  -2 -19   19.80    2.30
   1   2 -19   14.20    2.00
   1  -2 -19   12.80    2.20
  -1  -2  19   11.30    1.60
   1   2  19   13.70    2.30
   1  -2 -19   15.30    2.00
  -1   2 -19   17.80    2.30
  -2   2  19  128.29    8.20
   2   2 -19  142.89    8.30
  -2  -2 -19  149.49    8.70
   2   2  19  144.99    9.30
  -2   2 -19  151.68    8.80
  -2  -2  19  134.89    8.10
   2  -2 -19  146.39    8.10
   2  -2 -19  146.79    8.30
  -3  -2 -19   69.09    4.70
  -3   2  19   70.79    4.70
   3   2  19   69.39    5.40
  -3   2 -19   64.79    4.70
  -3  -2  19   66.29    4.50
   4   2 -19   46.60    3.60
  -4   2  19   46.60    3.30
  -4  -2 -19   43.90    3.20
  -4  -2  19   41.70    3.20
   4   2  19   39.70    3.50
  -4   2 -19   49.00    3.60
   5   2 -19  131.29    7.30
  -5  -2  19  128.69    7.10
   0  -3 -19    6.80    1.50
   1   3 -19   21.10    2.40
  -1  -3 -19   23.90    2.50
   1   3  19   22.40    3.00
  -1   3 -19   24.00    2.60
  -1  -3  19   23.70    2.00
   1  -3 -19   22.30    2.40
   2   3 -19   66.29    4.40
  -2  -3 -19   66.29    4.60
   2  -3 -19   63.59    4.20
  -2   3 -19   62.29    4.70
  -2  -3  19   58.09    4.10
   2   3  19   65.69    5.30
  -3  -3 -19  105.89    6.50
  -3   3 -19  109.89    6.80
   3   3  19  119.59    7.50
  -3  -3  19  100.69    6.30
   4   3 -19   99.19    6.10
  -4  -3 -19   92.99    5.90
  -4  -3  19   96.99    5.70
   4   3  19   99.69    6.40
  -4   3 -19  102.09    6.00
   5   3 -19  231.68   11.40
  -5  -3  19  207.88   11.10
   0  -4 -19    3.70    1.00
   0   4 -19    2.50    0.90
   1   4 -19   16.60    1.90
  -1  -4 -19   15.60    1.90
  -1  -4  19   15.40    1.50
  -1   4 -19   17.50    2.10
   1   4  19   17.60    2.40
   1  -4 -19   14.90    1.70
   2   4 -19  247.48   13.10
  -2  -4 -19  273.97   14.50
  -2  -4  19  256.87   13.10
   2  -4 -19  239.38   12.90
   3  -4  19  140.89    9.50
  -3  -4 -19  181.18    9.30
   3   4 -19  173.28    9.70
  -3  -4  19  167.28    9.00
   3   4  19  179.98   10.30
  -3   4 -19  176.88    9.50
   4   4 -19   10.80    1.30
  -4  -4 -19    8.30    1.00
  -4   4 -19   11.40    1.30
   4   4  19    8.00    1.50
  -4  -4  19   12.20    1.10
   0   5  19  242.68   13.90
   0   5 -19  229.28   12.80
   0  -5 -19  240.28   12.50
   1   5 -19   68.59    4.40
  -1  -5 -19   71.29    4.50
   1   5  19   67.39    5.30
  -1  -5  19   64.79    3.70
   1  -5 -19   69.49    4.20
  -1   5 -19   70.69    4.70
  -2  -5 -19   95.79    5.40
   2   5 -19   77.69    5.00
   2  -5 -19   89.29    4.80
  -2   5 -19   91.99    5.60
   2   5  19   94.89    6.40
  -2  -5  19   93.39    5.10
  -3  -5 -19   12.50    1.40
  -3   5 -19   14.40    1.50
   3   5  19   18.10    2.00
  -3  -5  19   12.60    1.20
   0   6  19    2.60    1.00
   0  -6 -19    3.70    0.70
   0   6 -19    5.40    1.00
   1   6 -19  176.18    9.10
  -1   6  19  174.88   10.30
   1   6  19  179.58   10.40
  -1   6 -19  181.28    9.70
   1  -6 -19  182.98    9.10
  -2   6  19    5.20    1.10
  -2  -6 -19    4.90    0.80
   2   6 -19    5.00    0.80
  -2   6 -19    3.40    1.00
   0   0 -20    5.80    1.50
  -1   0  20   66.79    4.50
  -1   0 -20   71.19    5.10
   1   0 -20   78.79    5.20
   2   0 -20    8.00    1.20
  -2   0  20    9.00    1.30
  -3   0  20   38.10    3.20
  -3   0 -20   46.40    3.40
   3   0 -20   41.80    3.30
  -4   0 -20  223.58   12.20
  -4   0  20  229.78   12.00
   4   0 -20  232.88   12.00
   5   0 -20  183.58    9.50
  -5   0  20  188.58    9.60
   0   1 -20   39.30    3.50
   0   1  20   42.80    3.90
   0  -1 -20   41.80    3.60
   1   1 -20  262.07   14.10
  -1  -1 -20  269.97   14.30
   1   1  20  257.27   14.40
  -1  -1  20  247.68   13.40
  -1   1 -20  252.27   14.20
   1  -1 -20  260.97   14.00
  -2   1  20  442.46   23.60
  -2  -1 -20  480.45   24.20
   2   1 -20  468.15   23.70
  -2  -1  20  457.45   23.60
   2  -1 -20  470.95   23.70
   2   1  20  469.45   24.10
   2  -1 -20  510.45   24.00
  -2   1 -20  470.75   24.10
  -3   1  20  142.09    8.70
   3   1 -20  148.19    8.60
  -3  -1 -20  157.38    8.50
  -3   1 -20  149.29    8.50
  -3  -1  20  139.59    8.90
  -4  -1 -20   13.80    1.50
   4   1 -20   16.10    1.70
  -4   1  20   17.80    1.70
   4  -1 -20   13.60    1.40
  -4  -1  20   14.70    1.50
  -4   1 -20   13.80    1.50
   0   2 -20    5.10    1.20
   0  -2 -20    2.80    0.90
   0   2  20    3.40    1.20
   1   2 -20  162.98    9.30
  -1  -2 -20  164.18    9.50
  -1   2 -20  155.58    9.40
   1   2  20  161.88   10.20
   1  -2 -20  162.08    9.30
  -2  -2 -20   33.30    2.80
   2   2 -20   29.90    2.50
   2   2  20   29.10    3.00
  -2   2 -20   29.40    2.80
  -2  -2  20   30.40    2.50
   2  -2 -20   28.70    2.50
  -3  -2 -20   22.60    2.10
   3   2 -20   24.80    2.30
  -3   2 -20   21.30    2.20
   3   2  20   21.10    2.30
  -3  -2  20   21.20    1.90
  -4  -2 -20  303.07   16.20
  -4   2 -20  328.27   16.40
  -4  -2  20  345.37   16.50
   0  -3 -20   48.60    3.70
   0   3 -20   42.50    3.60
   0   3  20   52.69    4.50
   1   3 -20  320.97   17.40
  -1  -3 -20  341.97   17.60
  -1   3 -20  331.37   17.70
   1   3  20  351.36   19.40
   1  -3 -20  332.87   17.30
  -1  -3  20  338.27   16.70
   2   3 -20  376.56   20.10
  -2  -3 -20  412.56   20.60
   2  -3 -20  404.46   20.10
  -2   3 -20  421.76   20.90
  -2  -3  20  406.66   20.10
  -3  -3 -20    7.20    1.10
   3   3 -20    7.20    1.20
  -3   3 -20    6.60    1.10
   3   3  20    6.10    1.30
  -3  -3  20    6.60    1.00
   4   3 -20   10.20    1.20
  -4  -3 -20   11.50    1.20
   4   3  20   10.20    1.40
  -4  -3  20   12.90    1.20
  -4   3 -20   11.20    1.20
   0  -4 -20  200.88   10.70
   0   4 -20  195.98   10.90
   0   4  20  196.68   11.60
  -1  -4 -20   95.79    5.70
   1   4 -20   97.39    5.60
  -1   4 -20   81.49    5.70
   1   4  20   91.59    6.30
   1  -4 -20   90.99    5.40
  -2  -4 -20   81.09    4.70
   2   4 -20   69.29    4.10
  -2  -4  20   75.49    4.30
   2   4  20   74.69    5.30
   2  -4 -20   71.29    4.10
  -2   4 -20   78.49    4.90
  -3  -4 -20   11.10    1.30
   3   4 -20   11.60    1.40
  -3   4 -20   10.40    1.20
   3   4  20   10.70    1.70
  -3  -4  20    8.40    1.00
   0   5  20   87.49    5.90
   0   5 -20   81.79    5.30
   0  -5 -20   87.49    5.00
  -1  -5 -20  123.29    6.60
   1   5 -20  121.29    6.60
  -1   5  20  117.29    7.70
  -1   5 -20  111.79    6.70
   1  -5 -20  116.19    6.20
   1   5  20  101.69    8.00
   2   5 -20  113.49    6.40
  -2  -5 -20  109.39    6.10
   2   5  20  106.59    6.70
  -2   5 -20  112.79    6.30
   0   0 -21    0.60    0.60
   1   0 -21   35.00    2.90
  -1   0 -21   35.90    3.10
   2   0 -21   25.50    2.20
  -2   0  21   17.00    1.70
   2   0 -21   21.00    1.80
  -2   0 -21   20.30    2.10
   3   0 -21  190.18    9.90
  -3   0 -21  191.38   10.60
  -3   0  21  178.78    9.80
  -4   0 -21  206.98   10.60
  -4   0  21  184.08   10.50
   4   0 -21  220.38   10.90
   0  -1 -21   58.59    4.10
   0   1  21   54.29    4.70
   0   1 -21   54.39    4.00
  -1  -1 -21   36.10    3.00
   1   1 -21   36.20    3.00
   1  -1 -21   37.80    2.80
   1  -1 -21   31.90    2.90
  -1  -1  21   33.50    2.40
  -1   1 -21   38.00    3.10
  -2   1  21   29.00    2.60
   2   1 -21   29.10    2.30
  -2  -1 -21   33.00    2.70
   2  -1 -21   40.30    3.50
  -2   1 -21   36.90    2.90
   2  -1 -21   30.50    2.30
  -2  -1  21   30.10    2.30
   3   1 -21  166.08    9.30
  -3  -1 -21  165.78    9.10
  -3   1 -21  146.19    9.20
  -3  -1  21  163.08    8.60
  -4  -1 -21   26.00    1.90
   4   1 -21   30.80    2.20
  -4   1 -21   27.60    2.00
  -4  -1  21   30.50    2.10
   0   2  21  565.14   27.90
   0   2 -21  546.45   27.90
   0  -2 -21  533.85   27.60
   1   2 -21    5.80    1.20
  -1  -2 -21    5.60    1.40
  -1   2  21    5.90    1.30
   1  -2 -21    6.50    1.00
  -1   2 -21    6.80    1.50
  -1  -2  21    7.80    1.40
   1   2  21    6.10    1.40
  -2  -2 -21  100.39    5.90
   2   2 -21   93.39    5.40
   2   2  21   94.99    5.90
   2  -2 -21   92.69    5.40
  -2   2 -21  104.99    6.00
  -3  -2 -21  360.16   18.00
  -3   2 -21  367.46   18.10
  -3  -2  21  349.57   17.80
   0   3 -21    1.40    0.60
   0  -3 -21    2.50    0.70
   0   3  21    0.50    0.60
  -1   3  21   92.29    6.40
  -1  -3 -21   97.89    5.80
   1   3 -21   94.99    5.70
  -1   3 -21  102.69    6.00
   1  -3 -21   98.09    5.60
   2   3 -21  118.89    6.70
  -2  -3 -21  136.39    7.30
  -2  -3  21  131.69    6.80
   2  -3 -21  128.39    6.60
   2   3  21  125.69    8.20
  -2   3 -21  141.89    7.50
  -3  -3 -21  101.99    5.70
   3   3 -21  106.09    6.00
  -3  -3  21   99.99    5.50
  -3   3 -21  108.79    5.90
   0   4  21    5.20    1.30
   0   4 -21    7.20    1.10
   0  -4 -21    6.00    0.90
  -1   4  21    9.00    1.30
  -1  -4 -21   10.50    1.30
   1  -4 -21    8.00    1.00
  -1   4 -21    9.60    1.20
   1   4  21    7.70    1.30
  -2  -4 -21   36.90    2.50
   2   4 -21   38.30    2.80
  -2   4  21   31.90    2.70
  -2   4 -21   43.70    2.80
   2   4  21   38.10    2.90
   0   5 -21   21.60    1.70
   0   5  21   25.80    2.20
   0  -5 -21   24.30    1.70
   0   0 -22   33.70    2.70
   1   0 -22    2.20    1.10
  -1   0 -22    2.30    0.70
   1   0 -22    1.60    0.60
  -2   0 -22    3.10    0.80
   2   0 -22    3.70    0.70
   2   0 -22    3.40    0.80
  -3   0 -22   45.50    3.00
   0   1 -22    8.10    1.20
   0  -1 -22    8.60    1.20
   1   1 -22  217.88   11.60
  -1  -1 -22  231.28   11.90
   1  -1 -22  218.58   11.60
  -1   1 -22  229.48   12.00
   2   1 -22  195.58   11.10
  -2  -1 -22  225.58   12.00
  -2   1 -22  222.98   11.90
   3   1 -22  134.89    7.00
  -3  -1 -22  130.89    7.10
  -3   1 -22  132.19    7.10
   0   2  22   93.89    6.20
   0   2 -22  106.19    6.00
   0  -2 -22  107.99    6.00
  -1  -2 -22   48.70    3.20
   1   2 -22   40.90    2.90
  -1   2  22   41.80    3.30
   1  -2 -22   44.90    2.90
  -1   2 -22   46.20    3.20
   2   2 -22   85.19    5.10
  -2  -2 -22   87.79    5.00
  -2   2 -22   86.29    5.10
   0   3  22    1.30    0.70
   0  -3 -22    1.70    0.50
   0   3 -22    1.90    0.50
   1   3 -22  136.59    6.90
  -1  -3 -22  137.19    7.10
  -1   3  22  122.19    7.20
   1   3  22  119.99    7.70
   1  -3 -22  138.89    6.80
   2   3 -22   90.59    5.00
  -2  -3 -22   78.49    4.70
  -2   3 -22   81.29    4.80
   0   0 -23    0.00    0.30
   1   0 -23    3.30    0.60
  -1   0 -23    4.10    0.80
   0   1 -23   84.19    4.70
   0  -1 -23   77.79    4.60
  -1  -1 -23   16.10    1.40
   1   1 -23   14.20    1.30
   1   1 -23   13.60    1.20
   1  -1 -23   14.30    1.20
   0  -2 -23    4.40    0.70
   0   2 -23    5.50    0.70
   0   0   0    0.00    0.00

_computing_structure_solution     'SHELXT 2014/5 (Sheldrick, 2014)'
;
_shelx_hkl_checksum                     59550
